# Supplementary material for: Russian Doll-like 3d–4f Cluster Wheels with Slow Relaxation of Magnetization
Source: MDPI journal article supplement (doi:10.3390/molecules28155906), 2023-08-06

## checkCIF/PLATON report

You have not supplied any structure factors. As a result the full set of tests cannot be run.

THIS REPORT IS FOR GUIDANCE ONLY. IF USED AS PART OF A REVIEW PROCEDURE FOR PUBLICATION, IT SHOULD NOT REPLACE THE EXPERTISE OF AN EXPERIENCED CRYSTALLOGRAPHIC REFEREE.

No syntax errors found.      CIF dictionary      Interpreting this report

### Datablock: 20191011-CZL-PY-2-2

---

|                        |                                          |                                          |                          |
|------------------------|------------------------------------------|------------------------------------------|--------------------------|
| Bond precision:        | C-C = 0.0187 Å                           | Wavelength=0.71073                       |                          |
| Cell:                  | a=20.5601(7)<br>alpha=90                 | b=20.5601(7)<br>beta=90                  | c=32.526(3)<br>gamma=120 |
| Temperature:           | 153 K                                    |                                          |                          |
|                        | Calculated                               | Reported                                 |                          |
| Volume                 | 11907.3(14)                              | 11907.2(13)                              |                          |
| Space group            | R -3                                     | R -3 :H                                  |                          |
| Hall group             | -R 3                                     | -R 3                                     |                          |
| Moiety formula         | C144 H114 Cl13 N12 Ni6 O30<br>Tb7, 2(C1) | C144 H114 Cl13 N12 Ni6 O30<br>Tb7, 2(C1) |                          |
| Sum formula            | C144 H114 Cl15 N12 Ni6 O30<br>Tb7        | C144 H114 Cl15 N12 Ni6 O30<br>Tb7        |                          |
| Mr                     | 4488.88                                  | 4488.92                                  |                          |
| Dx, g cm <sup>-3</sup> | 1.878                                    | 1.878                                    |                          |
| Z                      | 3                                        | 3                                        |                          |
| Mu (mm <sup>-1</sup> ) | 4.090                                    | 4.090                                    |                          |
| F000                   | 6540.0                                   | 6540.0                                   |                          |
| F000'                  | 6551.35                                  |                                          |                          |
| h, k, lmax             | 24, 24, 38                               | 24, 22, 38                               |                          |
| Nref                   | 4684                                     | 4671                                     |                          |
| Tmin, Tmax             | 0.374, 0.479                             | 0.374, 0.479                             |                          |
| Tmin'                  | 0.346                                    |                                          |                          |

Correction method= # Reported T Limits: Tmin=0.374 Tmax=0.479

AbsCorr = MULTII-SCAN

Data completeness= 0.997

Theta(max)= 25.019

R(reflections)= 0.0595( 3601)

wR2(reflections)=  
0.1639( 4671)

S = 1.038

Npar= 358

The following ALERTS were generated. Each ALERT has the format

**test-name\_ALERT\_alert-type\_alert-level.**

Click on the hyperlinks for more details of the test.

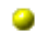

### Alert level C

|                   |                    |                          |                                 |                     |       |         |              |
|-------------------|--------------------|--------------------------|---------------------------------|---------------------|-------|---------|--------------|
| PLAT220_ALERT_2_C | NonSolvent         | Resd 1                   | C                               | Ueq(max)/Ueq(min)   | Range | 5.0     | Ratio        |
| PLAT220_ALERT_2_C | NonSolvent         | Resd 1                   | Cl                              | Ueq(max)/Ueq(min)   | Range | 5.4     | Ratio        |
| PLAT222_ALERT_3_C | NonSolvent         | Resd 1                   | H                               | Uiso(max)/Uiso(min) | Range | 6.7     | Ratio        |
| PLAT230_ALERT_2_C | Hirshfeld Test     | Diff for                 | O3                              | --C13               | .     | 5.3     | s.u.         |
| PLAT232_ALERT_2_C | Hirshfeld Test     | Diff (M-X)               | Ni1                             | --N1                | .     | 5.7     | s.u.         |
| PLAT234_ALERT_4_C | Large Hirshfeld    | Difference               | N1                              | --C14               | .     | 0.24    | Ang.         |
| PLAT241_ALERT_2_C | High               | 'MainMol'                | Ueq as Compared to Neighbors of |                     | C14   | Check   |              |
| PLAT242_ALERT_2_C | Low                | 'MainMol'                | Ueq as Compared to Neighbors of |                     | O3    | Check   |              |
| PLAT242_ALERT_2_C | Low                | 'MainMol'                | Ueq as Compared to Neighbors of |                     | N1    | Check   |              |
| PLAT242_ALERT_2_C | Low                | 'MainMol'                | Ueq as Compared to Neighbors of |                     | C22   | Check   |              |
| PLAT260_ALERT_2_C | Large Average      | Ueq of Residue Including |                                 |                     | Cl4   | 0.252   | Check        |
| PLAT260_ALERT_2_C | Large Average      | Ueq of Residue Including |                                 |                     | Cl4'  | 0.251   | Check        |
| PLAT303_ALERT_2_C | Full Occupancy     | Atom H13C                | with # Connections              |                     |       | 1.13    | Check        |
| PLAT342_ALERT_3_C | Low Bond Precision | on C-C Bonds             | .....                           |                     |       | 0.01865 | Ang.         |
| PLAT420_ALERT_2_C | D-H Bond Without   | Acceptor                 | Cl3                             | --H13C              | .     |         | Please Check |

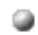

### Alert level G

|                   |                                                   |                |        |       |
|-------------------|---------------------------------------------------|----------------|--------|-------|
| PLAT002_ALERT_2_G | Number of Distance or Angle Restraints on AtSite  | 8              | Note   |       |
| PLAT003_ALERT_2_G | Number of Uiso or Uij Restrainted non-H Atoms ... | 39             | Report |       |
| PLAT007_ALERT_5_G | Number of Unrefined Donor-H Atoms .....           | 3              | Report |       |
| PLAT066_ALERT_1_G | Predicted and Reported Tmin&Tmax Range Identical  | ?              | Check  |       |
| PLAT083_ALERT_2_G | SHELXL Second Parameter in WGHT Unusually Large   | 397.96         | Why ?  |       |
| PLAT172_ALERT_4_G | The CIF-Embedded .res File Contains DFIX Records  | 5              | Report |       |
| PLAT177_ALERT_4_G | The CIF-Embedded .res File Contains DELU Records  | 3              | Report |       |
| PLAT178_ALERT_4_G | The CIF-Embedded .res File Contains SIMU Records  | 5              | Report |       |
| PLAT186_ALERT_4_G | The CIF-Embedded .res File Contains ISOR Records  | 5              | Report |       |
| PLAT188_ALERT_3_G | A Non-default SIMU Restraint Value has been used  | 0.0100         | Report |       |
| PLAT188_ALERT_3_G | A Non-default SIMU Restraint Value has been used  | 0.0100         | Report |       |
| PLAT188_ALERT_3_G | A Non-default SIMU Restraint Value has been used  | 0.0100         | Report |       |
| PLAT188_ALERT_3_G | A Non-default SIMU Restraint Value has been used  | 0.0100         | Report |       |
| PLAT192_ALERT_3_G | A Non-default DELU Restraint Value for First Par  | 0.0200         | Report |       |
| PLAT192_ALERT_3_G | A Non-default DELU Restraint Value for First Par  | 0.0200         | Report |       |
| PLAT192_ALERT_3_G | A Non-default DELU Restraint Value for SecondPar  | 0.0200         | Report |       |
| PLAT300_ALERT_4_G | Atom Site Occupancy of Tb2                        | Constrained at | 0.5    | Check |
| PLAT300_ALERT_4_G | Atom Site Occupancy of Cl3                        | Constrained at | 0.1333 | Check |
| PLAT300_ALERT_4_G | Atom Site Occupancy of Cl3'                       | Constrained at | 0.1    | Check |
| PLAT300_ALERT_4_G | Atom Site Occupancy of O5                         | Constrained at | 0.5    | Check |
| PLAT300_ALERT_4_G | Atom Site Occupancy of O5'                        | Constrained at | 0.5    | Check |
| PLAT300_ALERT_4_G | Atom Site Occupancy of H51                        | Constrained at | 0.5    | Check |
| PLAT300_ALERT_4_G | Atom Site Occupancy of H52                        | Constrained at | 0.5    | Check |
| PLAT300_ALERT_4_G | Atom Site Occupancy of Cl4                        | Constrained at | 0.1667 | Check |
| PLAT300_ALERT_4_G | Atom Site Occupancy of Cl4'                       | Constrained at | 0.1667 | Check |
| PLAT301_ALERT_3_G | Main Residue Disorder .....                       | (Resd 1 )      | 8%     | Note  |
| PLAT302_ALERT_4_G | Anion/Solvent/Minor-Residue Disorder (Resd 2 )    |                | 100%   | Note  |

|                   |                                                         |              |
|-------------------|---------------------------------------------------------|--------------|
| PLAT302_ALERT_4_G | Anion/Solvent/Minor-Residue Disorder (Resd 3 )          | 100% Note    |
| PLAT304_ALERT_4_G | Non-Integer Number of Atoms in ..... (Resd 2 )          | 0.17 Check   |
| PLAT304_ALERT_4_G | Non-Integer Number of Atoms in ..... (Resd 3 )          | 0.17 Check   |
| PLAT480_ALERT_4_G | Long H...A H-Bond Reported H13C ..05' .                 | 2.65 Ang.    |
| PLAT480_ALERT_4_G | Long H...A H-Bond Reported H13C ..CL3 .                 | 2.88 Ang.    |
| PLAT710_ALERT_4_G | Delete 1-2-3 or 2-3-4 Linear Torsion Angle ... #        | 35 Do !      |
|                   | NI1 -N1 -C14 -C15 -101.00 20.00 1_555 1_555 1_555 1_555 |              |
| PLAT764_ALERT_4_G | Overcomplete CIF Bond List Detected (Rep/Expd) .        | 1.11 Ratio   |
| PLAT790_ALERT_4_G | Centre of Gravity not Within Unit Cell: Resd. #         | 3 Note       |
|                   | C1                                                      |              |
| PLAT860_ALERT_3_G | Number of Least-Squares Restraints .....                | 311 Note     |
| PLAT883_ALERT_1_G | No Info/Value for _atom_sites_solution_primary .        | Please Do !  |
| PLAT941_ALERT_3_G | Average HKL Measurement Multiplicity .....              | 3.3 Low      |
| PLAT951_ALERT_5_G | Calculated (ThMax) and CIF-Reported Kmax Differ         | 2 Units      |
| PLAT965_ALERT_2_G | The SHELXL WEIGHT Optimisation has not Converged        | Please Check |
| PLAT967_ALERT_5_G | Note: Two-Theta Cutoff Value in Embedded .res ..        | 50.0 Degree  |

---

0 **ALERT level A** = Most likely a serious problem - resolve or explain  
 0 **ALERT level B** = A potentially serious problem, consider carefully  
 15 **ALERT level C** = Check. Ensure it is not caused by an omission or oversight  
 41 **ALERT level G** = General information/check it is not something unexpected

2 ALERT type 1 CIF construction/syntax error, inconsistent or missing data  
 16 ALERT type 2 Indicator that the structure model may be wrong or deficient  
 12 ALERT type 3 Indicator that the structure quality may be low  
 23 ALERT type 4 Improvement, methodology, query or suggestion  
 3 ALERT type 5 Informative message, check

---



---

It is advisable to attempt to resolve as many as possible of the alerts in all categories. Often the minor alerts point to easily fixed oversights, errors and omissions in your CIF or refinement strategy, so attention to these fine details can be worthwhile. In order to resolve some of the more serious problems it may be necessary to carry out additional measurements or structure refinements. However, the purpose of your study may justify the reported deviations and the more serious of these should normally be commented upon in the discussion or experimental section of a paper or in the "special\_details" fields of the CIF. checkCIF was carefully designed to identify outliers and unusual parameters, but every test has its limitations and alerts that are not important in a particular case may appear. Conversely, the absence of alerts does not guarantee there are no aspects of the results needing attention. It is up to the individual to critically assess their own results and, if necessary, seek expert advice.

### **Publication of your CIF in IUCr journals**

A basic structural check has been run on your CIF. These basic checks will be run on all CIFs submitted for publication in IUCr journals (*Acta Crystallographica*, *Journal of Applied Crystallography*, *Journal of Synchrotron Radiation*); however, if you intend to submit to *Acta Crystallographica Section C* or *E* or *IUCrData*, you should make sure that full publication checks are run on the final version of your CIF prior to submission.

### **Publication of your CIF in other journals**

Please refer to the *Notes for Authors* of the relevant journal for any special instructions relating to CIF submission.

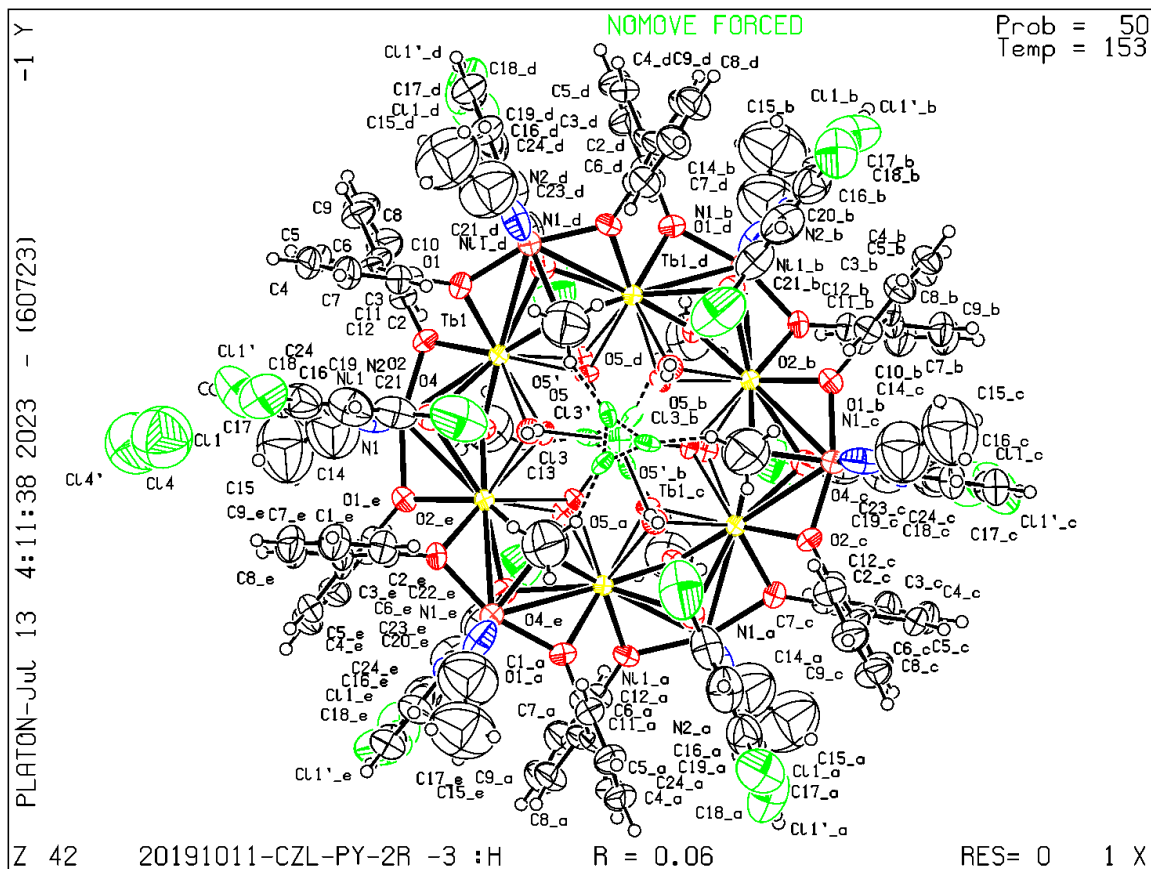

Supplement: s1 [file s1]
