# Supplementary material for: Russian Doll-like 3d–4f Cluster Wheels with Slow Relaxation of Magnetization
Source: MDPI journal article supplement (doi:10.3390/molecules28155906), 2023-08-06

## checkCIF/PLATON report

Structure factors have been supplied for datablock(s) 106-Pa-3

THIS REPORT IS FOR GUIDANCE ONLY. IF USED AS PART OF A REVIEW PROCEDURE FOR PUBLICATION, IT SHOULD NOT REPLACE THE EXPERTISE OF AN EXPERIENCED CRYSTALLOGRAPHIC REFEREE.

No syntax errors found.      CIF dictionary      Interpreting this report

### Datablock: 106-Pa-3

---

|                 |                                                     |                                                     |
|-----------------|-----------------------------------------------------|-----------------------------------------------------|
| Bond precision: | C-C = 0.0068 A                                      | Wavelength=0.71073                                  |
| Cell:           | a=25.0221 (2)                                       | b=25.0221 (2)      c=25.0221 (2)                    |
|                 | alpha=90                                            | beta=90      gamma=90                               |
| Temperature:    | 153 K                                               |                                                     |
|                 | Calculated                                          | Reported                                            |
| Volume          | 15666.5 (4)                                         | 15666.5 (4)                                         |
| Space group     | P a -3                                              | P a -3                                              |
| Hall group      | -P 2ac 2ab                                          | -P 2ac 2ab                                          |
| Moiety formula  | C144 H114 Cl13 Co6 Dy7 N12<br>O30, 2 (Cl), 3 (H2 O) | C144 H114 Cl13 Co6 Dy7 N12<br>O30, 2 (Cl), 3 (H2 O) |
| Sum formula     | C144 H120 Cl15 Co6 Dy7 N12<br>O33                   | C144 H120 Cl15 Co6 Dy7 N12<br>O33                   |
| Mr              | 4569.42                                             | 4569.34                                             |
| Dx, g cm-3      | 1.937                                               | 1.937                                               |
| Z               | 4                                                   | 4                                                   |
| Mu (mm-1)       | 4.240                                               | 4.240                                               |
| F000            | 8844.1                                              | 8844.0                                              |
| F000'           | 8859.18                                             |                                                     |
| h, k, lmax      | 29, 29, 29                                          | 29, 29, 29                                          |
| Nref            | 4615                                                | 4622                                                |
| Tmin, Tmax      | 0.357, 0.466                                        | 0.365, 0.474                                        |
| Tmin'           | 0.319                                               |                                                     |

Correction method= # Reported T Limits: Tmin=0.365 Tmax=0.474

AbsCorr = MULTII-SCAN

Data completeness= 1.002

Theta (max)= 25.007

R(reflections)= 0.0377( 3962)

wR2(reflections)=  
0.1108( 4622)

S = 1.069

Npar= 314

The following ALERTS were generated. Each ALERT has the format

**test-name\_ALERT\_alert-type\_alert-level.**

Click on the hyperlinks for more details of the test.

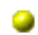

### Alert level C

|                   |                                        |                    |                                 |       |          |
|-------------------|----------------------------------------|--------------------|---------------------------------|-------|----------|
| PLAT220_ALERT_2_C | NonSolvent                             | Resd 1 C1          | Ueq(max)/Ueq(min) Range         | 4.1   | Ratio    |
| PLAT230_ALERT_2_C | Hirshfeld Test Diff for                | O3                 | --C13                           | 5.7   | s.u.     |
| PLAT242_ALERT_2_C | Low                                    | 'MainMol'          | Ueq as Compared to Neighbors of | C14   | Check    |
| PLAT260_ALERT_2_C | Large Average Ueq of Residue Including | O7                 |                                 | 0.117 | Check    |
| PLAT303_ALERT_2_C | Full Occupancy Atom H13B               |                    | with # Connections              | 1.11  | Check    |
| PLAT369_ALERT_2_C | Long                                   | C(sp2)-C(sp2) Bond | C6 - C7                         | 1.53  | Ang.     |
| PLAT701_ALERT_1_C | Bond Calc                              | 1.6252(7), Rep     | 1.626(2), Dev..                 | 1.14  | Sigma    |
|                   | DY2                                    | -DY2               | 1_555 13_655 .....              | #     | 20 Check |
| PLAT972_ALERT_2_C | Check Calcd Resid. Dens.               | 0.81Ang From Dy2   |                                 | -1.70 | eA-3     |
| PLAT975_ALERT_2_C | Check Calcd Resid. Dens.               | 1.07Ang From O7    |                                 | 1.21  | eA-3     |

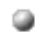

### Alert level G

|                   |                                                  |                          |             |
|-------------------|--------------------------------------------------|--------------------------|-------------|
| PLAT002_ALERT_2_G | Number of Distance or Angle Restraints on AtSite | 8                        | Note        |
| PLAT003_ALERT_2_G | Number of Uiso or Uij Restrained non-H Atoms ... | 8                        | Report      |
| PLAT007_ALERT_5_G | Number of Unrefined Donor-H Atoms .....          | 4                        | Report      |
| PLAT068_ALERT_1_G | Reported F000 Differs from Calcd (or Missing)... | Please                   | Check       |
| PLAT083_ALERT_2_G | SHELXL Second Parameter in WGHT Unusually Large  | 91.85                    | Why ?       |
| PLAT171_ALERT_4_G | The CIF-Embedded .res File Contains EADP Records | 1                        | Report      |
| PLAT172_ALERT_4_G | The CIF-Embedded .res File Contains DFIX Records | 3                        | Report      |
| PLAT177_ALERT_4_G | The CIF-Embedded .res File Contains DELU Records | 2                        | Report      |
| PLAT178_ALERT_4_G | The CIF-Embedded .res File Contains SIMU Records | 2                        | Report      |
| PLAT186_ALERT_4_G | The CIF-Embedded .res File Contains ISOR Records | 3                        | Report      |
| PLAT300_ALERT_4_G | Atom Site Occupancy of Dy2                       | Constrained at           | 0.5 Check   |
| PLAT300_ALERT_4_G | Atom Site Occupancy of O5                        | Constrained at           | 0.5 Check   |
| PLAT300_ALERT_4_G | Atom Site Occupancy of O5'                       | Constrained at           | 0.5 Check   |
| PLAT300_ALERT_4_G | Atom Site Occupancy of H51                       | Constrained at           | 0.5 Check   |
| PLAT300_ALERT_4_G | Atom Site Occupancy of H52                       | Constrained at           | 0.5 Check   |
| PLAT300_ALERT_4_G | Atom Site Occupancy of O7                        | Constrained at           | 0.5 Check   |
| PLAT300_ALERT_4_G | Atom Site Occupancy of H71                       | Constrained at           | 0.5 Check   |
| PLAT300_ALERT_4_G | Atom Site Occupancy of H72                       | Constrained at           | 0.5 Check   |
| PLAT301_ALERT_3_G | Main Residue Disorder .....                      | (Resd 1 )                | 5% Note     |
| PLAT302_ALERT_4_G | Anion/Solvent/Minor-Residue Disorder (Resd 3 )   | 100%                     | Note        |
| PLAT304_ALERT_4_G | Non-Integer Number of Atoms in .....             | (Resd 2 )                | 0.33 Check  |
| PLAT304_ALERT_4_G | Non-Integer Number of Atoms in .....             | (Resd 3 )                | 1.50 Check  |
| PLAT480_ALERT_4_G | Long H...A H-Bond Reported H16                   | ..CL4                    | 2.91 Ang.   |
| PLAT764_ALERT_4_G | Overcomplete CIF Bond List Detected (Rep/Expd)   |                          | 1.15 Ratio  |
| PLAT779_ALERT_4_G | Suspect or Irrelevant (Bond) Angle(s) in CIF ... | 43.70                    | Deg.        |
|                   | DY2 -O5 -DY2                                     | 1_555 1_555 13_655 ..... | # 236 Check |
| PLAT794_ALERT_5_G | Tentative Bond Valency for Co1                   | (II)                     | 2.11 Info   |
| PLAT860_ALERT_3_G | Number of Least-Squares Restraints .....         |                          | 75 Note     |
| PLAT883_ALERT_1_G | No Info/Value for _atom_sites_solution_primary   |                          | Please Do ! |
| PLAT909_ALERT_3_G | Percentage of I>2sig(I) Data at Theta(Max) Still | 75%                      | Note        |
| PLAT910_ALERT_3_G | Missing # of FCF Reflection(s) Below Theta(Min). | 2                        | Note        |
| PLAT913_ALERT_3_G | Missing # of Very Strong Reflections in FCF .... | 2                        | Note        |

|                   |                                                  |              |
|-------------------|--------------------------------------------------|--------------|
| PLAT965_ALERT_2_G | The SHELXL WEIGHT Optimisation has not Converged | Please Check |
| PLAT967_ALERT_5_G | Note: Two-Theta Cutoff Value in Embedded .res .. | 50.0 Degree  |
| PLAT978_ALERT_2_G | Number C-C Bonds with Positive Residual Density. | 0 Info       |
| PLAT996_ALERT_1_G | Non-Standard SHELXL LIST 4 Style FCF Supplied .. | ! Check      |

---

```

0 ALERT level A = Most likely a serious problem - resolve or explain
0 ALERT level B = A potentially serious problem, consider carefully
9 ALERT level C = Check. Ensure it is not caused by an omission or oversight
35 ALERT level G = General information/check it is not something unexpected

4 ALERT type 1 CIF construction/syntax error, inconsistent or missing data
13 ALERT type 2 Indicator that the structure model may be wrong or deficient
5 ALERT type 3 Indicator that the structure quality may be low
19 ALERT type 4 Improvement, methodology, query or suggestion
3 ALERT type 5 Informative message, check

```

---

It is advisable to attempt to resolve as many as possible of the alerts in all categories. Often the minor alerts point to easily fixed oversights, errors and omissions in your CIF or refinement strategy, so attention to these fine details can be worthwhile. In order to resolve some of the more serious problems it may be necessary to carry out additional measurements or structure refinements. However, the purpose of your study may justify the reported deviations and the more serious of these should normally be commented upon in the discussion or experimental section of a paper or in the "special\_details" fields of the CIF. checkCIF was carefully designed to identify outliers and unusual parameters, but every test has its limitations and alerts that are not important in a particular case may appear. Conversely, the absence of alerts does not guarantee there are no aspects of the results needing attention. It is up to the individual to critically assess their own results and, if necessary, seek expert advice.

### Publication of your CIF in IUCr journals

A basic structural check has been run on your CIF. These basic checks will be run on all CIFs submitted for publication in IUCr journals (*Acta Crystallographica*, *Journal of Applied Crystallography*, *Journal of Synchrotron Radiation*); however, if you intend to submit to *Acta Crystallographica Section C* or *E* or *IUCrData*, you should make sure that full publication checks are run on the final version of your CIF prior to submission.

### Publication of your CIF in other journals

Please refer to the *Notes for Authors* of the relevant journal for any special instructions relating to CIF submission.

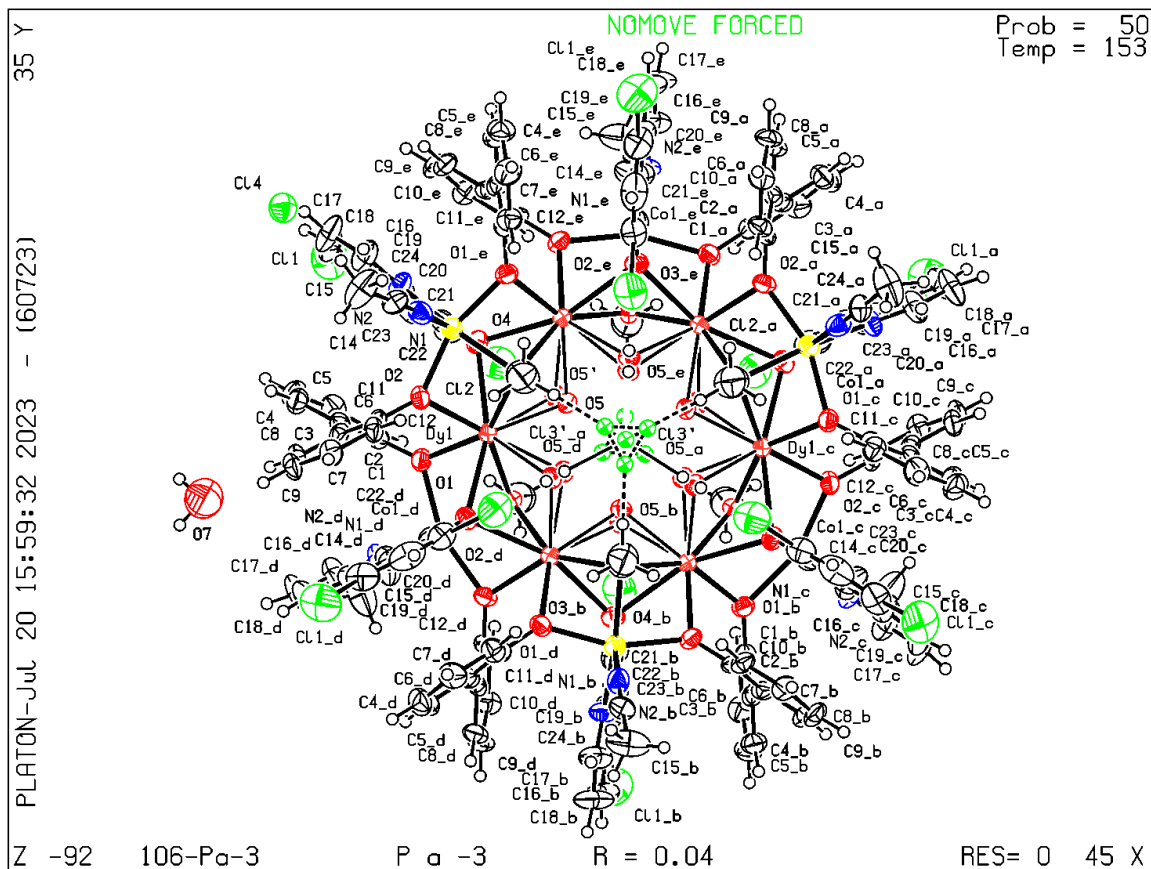

Supplement: s1 [file s1]
