# Supplementary material for: Russian Doll-like 3d–4f Cluster Wheels with Slow Relaxation of Magnetization
Source: MDPI journal article supplement (doi:10.3390/molecules28155906), 2023-08-06
Supplement: s1 [file s1]

## Supplementary Materials

# Russian Doll-like 3d–4f Cluster Wheels with Slow Relaxation of Magnetization <sup>†</sup>

Lan Liu <sup>1,‡</sup>, Panpan Yang <sup>1,‡</sup>, Zhihui Qiu <sup>1,\*</sup>, Kai Wang <sup>2,\*</sup>, Dongcheng Liu <sup>1</sup>, Yuning Liang <sup>1</sup>, Huancheng Hu <sup>1</sup>, Huahong Zou <sup>1</sup>, Fupei Liang <sup>1,2</sup> and Zilu Chen <sup>1,\*</sup>

<sup>1</sup> School of Chemistry and Pharmaceutical Sciences, Guangxi Normal University, Guilin 541004, China

<sup>2</sup> Guangxi Key Laboratory of Electrochemical and Magnetochemical Functional Materials, College of Chemistry and Bioengineering, Guilin University of Technology, Guilin 541004, China

\* Correspondence: zhihuiqiu@mailbox.gxnu.edu.cn (Z.Q.); kaiwang@glut.edu.cn (K.W.); zlchen@mailbox.gxnu.edu.cn (Z.C.)

<sup>†</sup> Electronic supplementary information (ESI) available: General materials and methods, crystallography details, PXRD patterns, additional figures for structural and magnetic properties. CCDC 2252491-2252493 respectively correspond to 1–3.

<sup>‡</sup> These authors contributed equally to this work.

## Contents

|                               |     |
|-------------------------------|-----|
| 1. Experimental Section ..... | S3  |
| 2. Supporting Figures .....   | S4  |
| 3. Supporting Tables .....    | S11 |

## Experimental Section

### X-ray Data Collection and Structure Refinement

The diffraction intensity data of these complexes were collected on SuperNova (**1** and **3**) and Synergy Custom DW (**2**) diffractometers. Their single-crystal structures were solved by the direct method using SHELXS and then refined using the program of SHELXL. All non-hydrogen atoms (C, N, O, Cl, Co, Ni, Dy, Tb) in the complexes were located from difference Fourier maps and subsequently refined with anisotropic displacement parameters. The central metal ion (Dy(III) for **1** and **2**, and Tb(III) for **3**) is disordered over two symmetry-related positions in an occupancy ratio of 0.5 : 0.5. The coordinated  $\text{Cl}^-$  and  $\mu_3\text{-OH}^-$  ligands in the three titled complexes are both disordered. In addition, the  $\text{CH}_3\text{CN}$  ligands, the two Cl atoms on  $(\text{L}^2)^-$  ligand, and the free  $\text{Cl}^-$  ion in **2** are also modelled as disorder. In **3**, one Cl atom on  $(\text{L}^2)^-$  ligand, and the free  $\text{Cl}^-$  ion are also modelled as disorder. The H atoms attached on C atoms were refined at the geometrical sites. The H atoms attached on the O atoms were located on a difference Fourier map. The detailed parameters for these structures are listed in Table S1. The selected bond lengths and bond angles of the complexes are presented in Table S2-S4, respectively, in the Supporting information.

## Supporting Figures

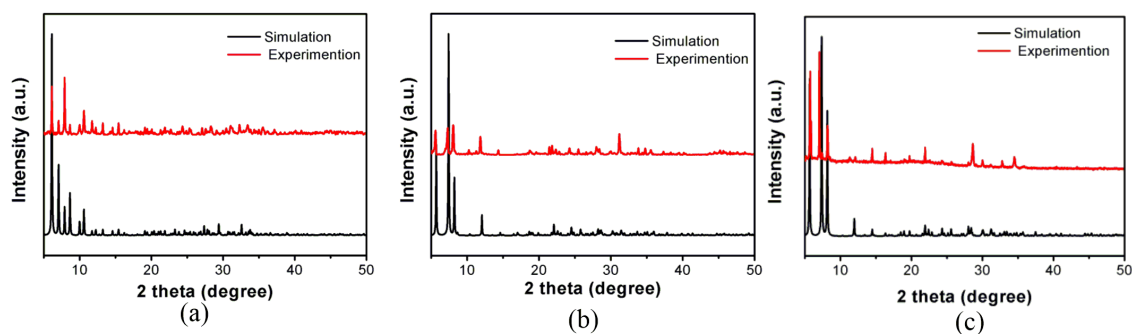

**Figure S1.** (a), (b), (c) correspond to the powder diffraction patterns of complexes **1-3**, respectively.

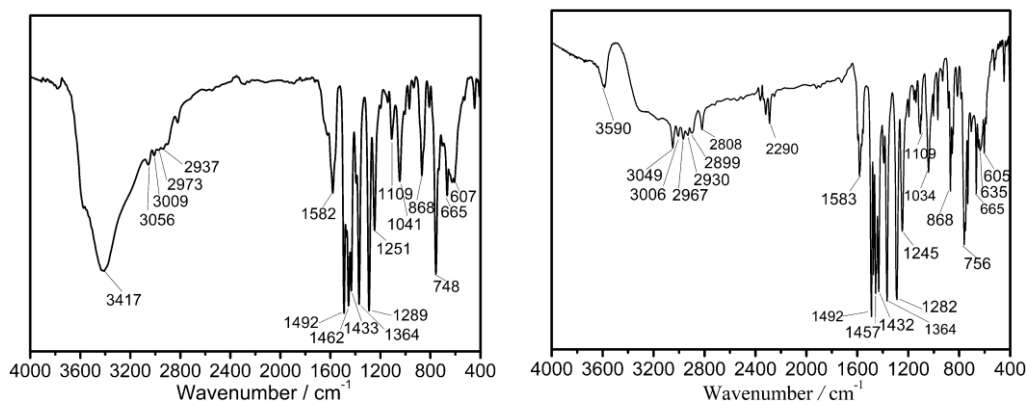

**Figure S2.** Infrared spectra of complexes **2** (left) and **3** (right).

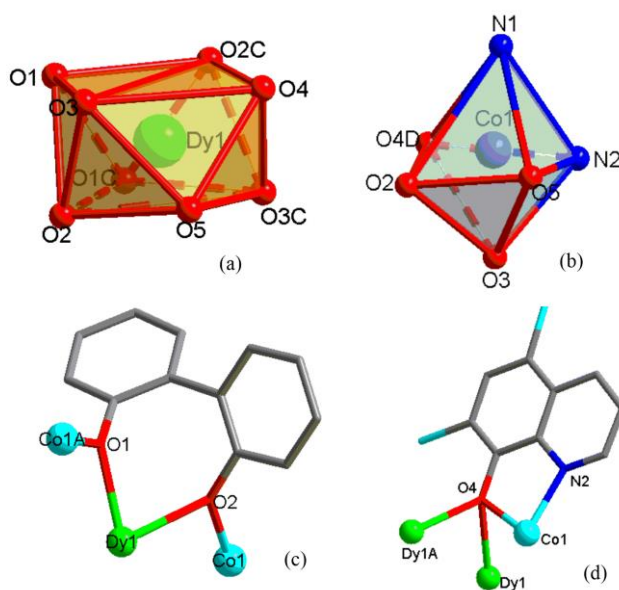

**Figure S3.** (a) Coordination mode diagram of Dy(III); (b) Coordination mode diagram of Co(II); (c) Ligand ( $L^1$ )<sup>2-</sup> coordination pattern diagram; (d) Coordination pattern of ligand ( $L^2$ )<sup>-</sup>.

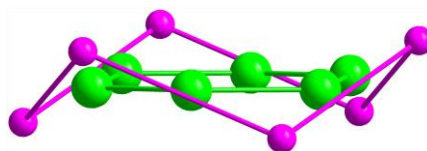

**Figure S4.** Metal skeleton of Co<sub>6</sub>Dy<sub>6</sub> metallacrown ether in **1**.

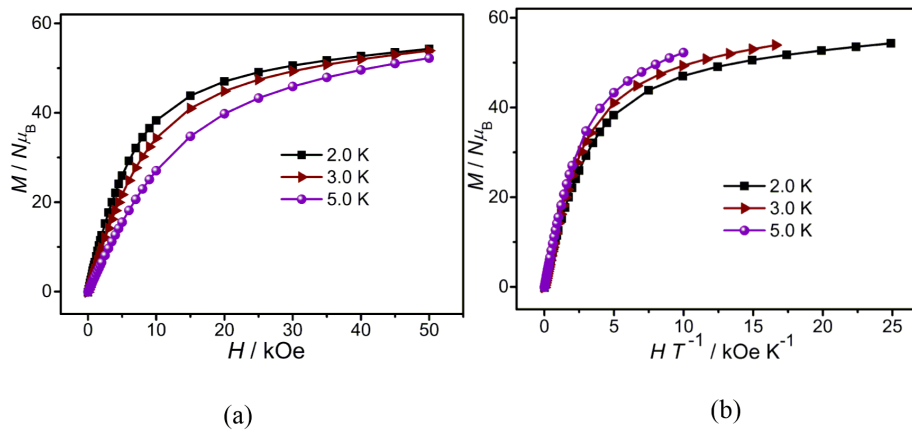

**Figure S5.**  $M$ - $H$  (a) and  $M$ - $HT^{-1}$  (b) curves of **1**.

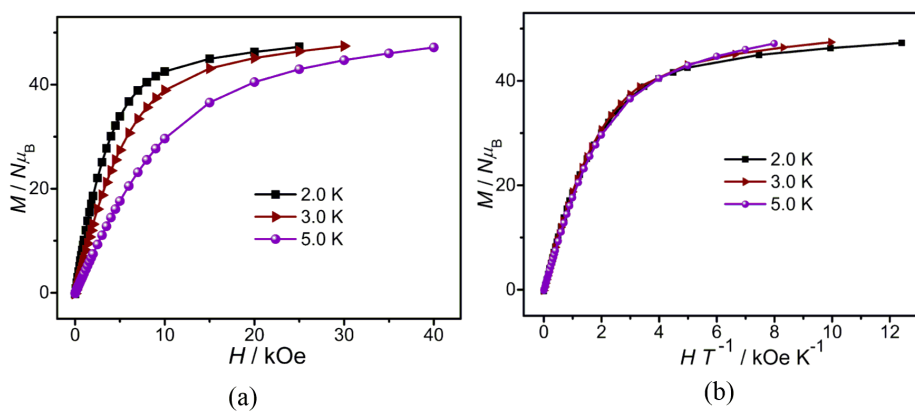

**Figure S6.**  $M$ - $H$  (a) and  $M$ - $HT^{-1}$  (b) curves of **2**.

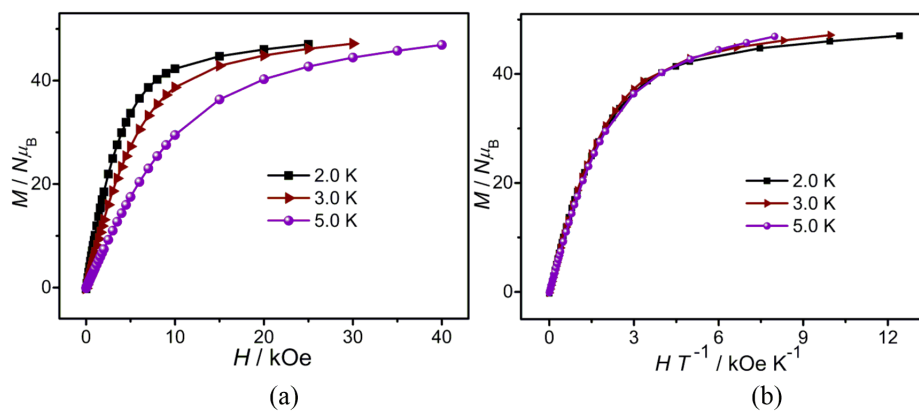

**Figure S7.**  $M$ - $H$  (a) and  $M$ - $HT^{-1}$  (b) curves of **3**.

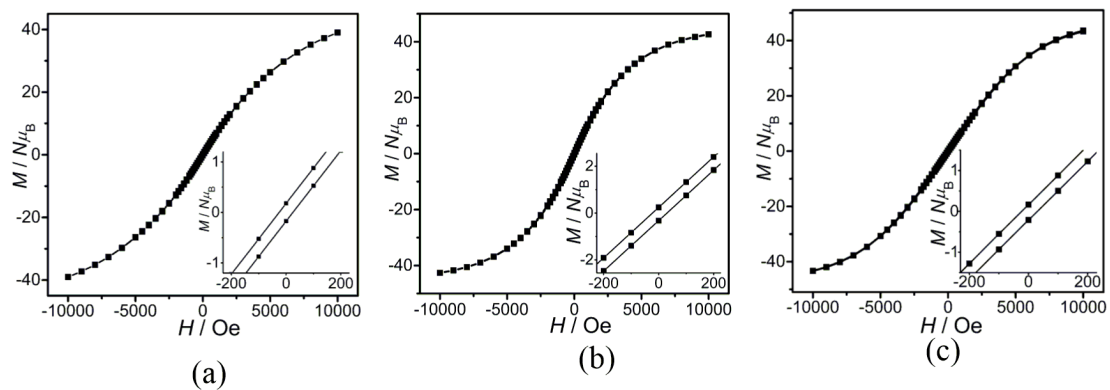

**Figure S8.** Hysteresis curves measured at 2 K for **1** (a), **2** (b), **3** (c) with the scan rate of 200 Oe/s.

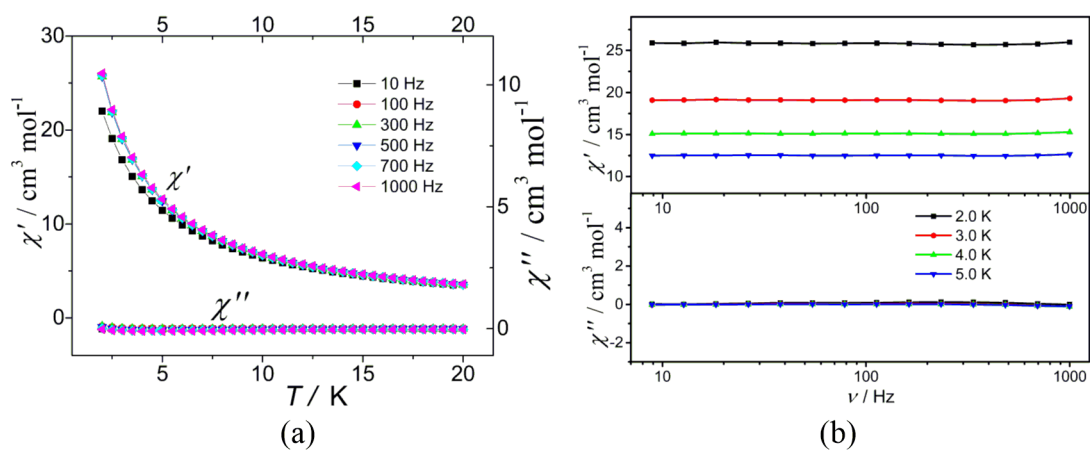

**Figure S9.** Temperature-dependent (a) and frequency-dependent (b) ac magnetic susceptibilities under zero dc field for **1**.

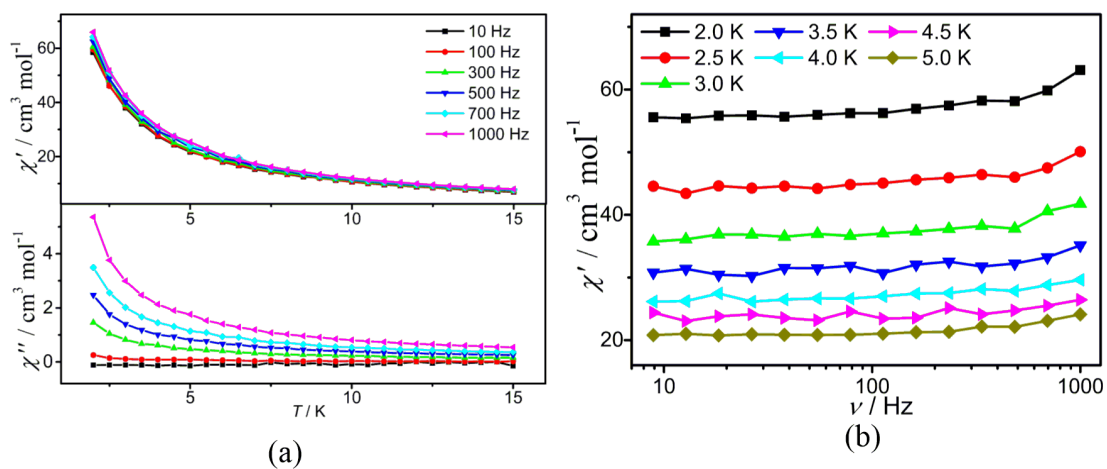

**Figure S10.** Temperature-dependent (a) and frequency-dependent (b) ac magnetic susceptibilities under zero dc field for **2**.

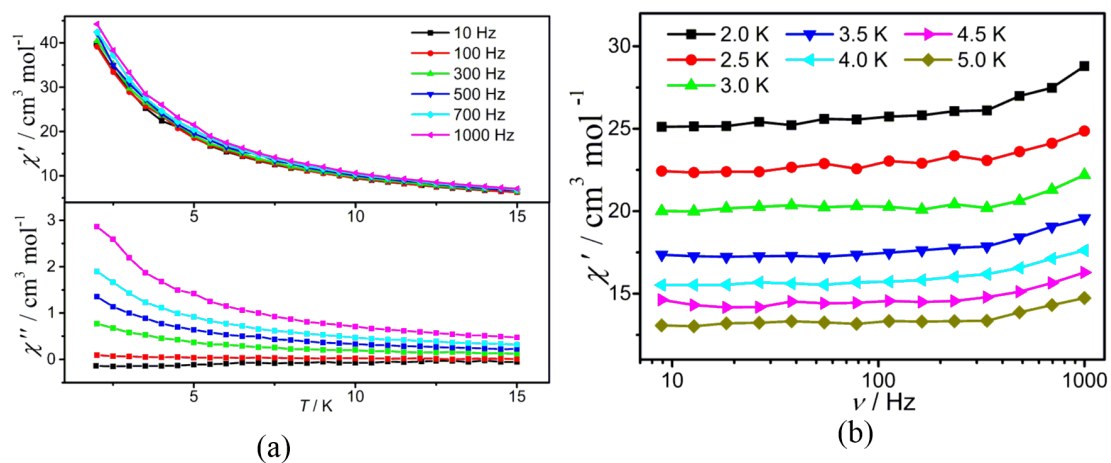

**Figure S11.** Temperature-dependent (a) and frequency-dependent (b) ac magnetic susceptibilities under zero dc field for **3**.

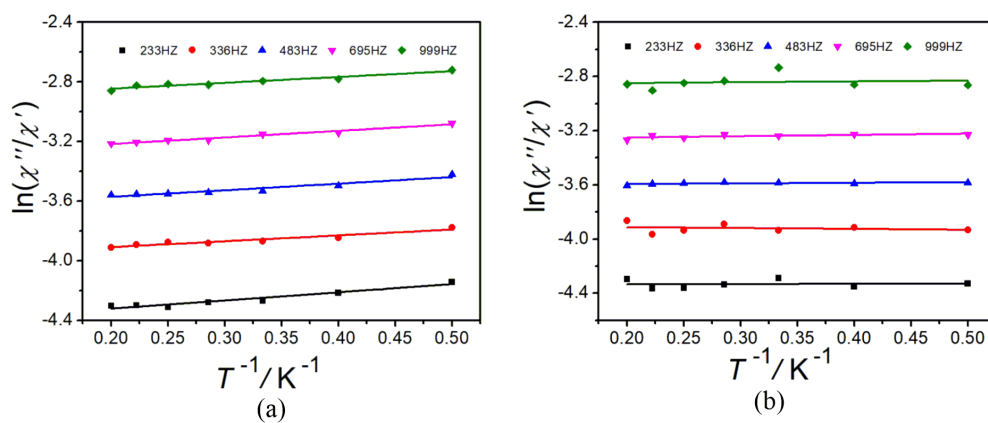

**Figure S12.** (a) and (b) correspond to  $\ln(\chi''/\chi')$  versus  $1/T$  plots for complexes **2** and **3**, respectively.

## Supporting Tables

**Table S1.** Crystal data and structural refining parameters for **1-3**.

| complex                                             | <b>1</b>                                                                                                           | <b>2</b>                                                                                                           | <b>3</b>                                                                                                           |
|-----------------------------------------------------|--------------------------------------------------------------------------------------------------------------------|--------------------------------------------------------------------------------------------------------------------|--------------------------------------------------------------------------------------------------------------------|
| Formula                                             | C <sub>144</sub> H <sub>120</sub> N <sub>12</sub> O <sub>33</sub> Cl <sub>15</sub> Co <sub>6</sub> Dy <sub>7</sub> | C <sub>144</sub> H <sub>114</sub> N <sub>12</sub> O <sub>30</sub> Cl <sub>15</sub> Ni <sub>6</sub> Dy <sub>7</sub> | C <sub>144</sub> H <sub>114</sub> N <sub>12</sub> O <sub>30</sub> Cl <sub>15</sub> Ni <sub>6</sub> Tb <sub>7</sub> |
| Fw                                                  | 4569.34                                                                                                            | 4513.98                                                                                                            | 4488.92                                                                                                            |
| <i>T</i> / K                                        | 153(2)                                                                                                             | 153(2)                                                                                                             | 153(2)                                                                                                             |
| $\lambda$ / Å                                       | 0.71073                                                                                                            | 0.71073                                                                                                            | 0.71073                                                                                                            |
| Crystal system                                      | Cubic                                                                                                              | Trigonal                                                                                                           | Trigonal                                                                                                           |
| Space group                                         | <i>Pa</i> -3                                                                                                       | <i>R</i> -3                                                                                                        | <i>R</i> -3                                                                                                        |
| <i>a</i> / Å                                        | 25.0221(2)                                                                                                         | 20.4123(4)                                                                                                         | 20.5601(7)                                                                                                         |
| <i>b</i> / Å                                        | 25.0221(2)                                                                                                         | 20.4123(4)                                                                                                         | 20.5601(7)                                                                                                         |
| <i>c</i> / Å                                        | 25.0221(2)                                                                                                         | 32.2304(8)                                                                                                         | 32.526(3)                                                                                                          |
| $\alpha$ / °                                        | 90.00                                                                                                              | 90.00                                                                                                              | 90.00                                                                                                              |
| $\beta$ / °                                         | 90.00                                                                                                              | 90.00                                                                                                              | 90.00                                                                                                              |
| $\gamma$ / °                                        | 90.00                                                                                                              | 120.00                                                                                                             | 120.00                                                                                                             |
| <i>V</i> / Å <sup>3</sup>                           | 15666.5(4)                                                                                                         | 11630.1(5)                                                                                                         | 11907.2(13)                                                                                                        |
| <i>Z</i>                                            | 4                                                                                                                  | 3                                                                                                                  | 3                                                                                                                  |
| <i>D</i> <sub>c</sub> / g cm <sup>-3</sup>          | 1.937                                                                                                              | 1.934                                                                                                              | 1.878                                                                                                              |
| $\mu$ / mm <sup>-1</sup>                            | 4.240                                                                                                              | 4.368                                                                                                              | 4.090                                                                                                              |
| <i>F</i> (000)                                      | 8844                                                                                                               | 6561                                                                                                               | 6540                                                                                                               |
| $\theta$ / °                                        | 1.820 to 25.007                                                                                                    | 1.995 to 25.011                                                                                                    | 3.393 to 25.019                                                                                                    |
| Reflns collected                                    | 23685                                                                                                              | 15007                                                                                                              | 15569                                                                                                              |
| Reflns unique                                       | 4622                                                                                                               | 4561                                                                                                               | 4671                                                                                                               |
| <i>R</i> <sub>int</sub>                             | 0.0331                                                                                                             | 0.0275                                                                                                             | 0.0435                                                                                                             |
| GOOF on <i>F</i> <sup>2</sup>                       | 1.069                                                                                                              | 1.105                                                                                                              | 1.038                                                                                                              |
| <i>R</i> <sub>1</sub> [ <i>I</i> > 2σ( <i>I</i> )]  | 0.0377                                                                                                             | 0.0489                                                                                                             | 0.0595                                                                                                             |
| <i>wR</i> <sub>2</sub> [ <i>I</i> > 2σ( <i>I</i> )] | 0.1020                                                                                                             | 0.1313                                                                                                             | 0.1435                                                                                                             |
| <i>R</i> <sub>1</sub> (all data)                    | 0.0475                                                                                                             | 0.0549                                                                                                             | 0.0796                                                                                                             |
| <i>wR</i> <sub>2</sub> (all data)                   | 0.1108                                                                                                             | 0.1383                                                                                                             | 0.1639                                                                                                             |



**Table S2** Selected bond lengths (Å) and angles (°) for complex **1**

|            |            |              |            |               |            |
|------------|------------|--------------|------------|---------------|------------|
| Co1-O2     | 2.053(4)   | O1-Dy1-O2    | 75.83(15)  | Dy2C-Dy2-O5'E | 100.7(3)   |
| Co1-O1A    | 2.061(4)   | O1-Dy1-O5    | 132.6(3)   | O5'D-Dy2-O5'E | 116.66(18) |
| Co1-N1     | 2.065(6)   | O2-Dy1-O5    | 133.1(3)   | Dy2C-Dy2-O5'  | 100.7(3)   |
| Co1-N2     | 2.099(6)   | O1-Dy1-O3    | 145.23(15) | O5'D-Dy2-O5'  | 116.66(18) |
| Co1-O3     | 2.110(4)   | O2-Dy1-O3    | 71.68(15)  | O5'E-Dy2-O5'  | 116.66(18) |
| Co1-O4     | 2.154(4)   | O5-Dy1-O3    | 67.9(3)    | Dy2C-Dy2-O5B  | 51.9(3)    |
| Dy1-O1     | 2.265(4)   | O1-Dy1-O3B   | 69.72(15)  | O5D-Dy2-O5B   | 136.3(2)   |
| Dy1-O2     | 2.277(4)   | O2-Dy1-O3B   | 142.68(14) | O5E-Dy2-O5B   | 63.1(3)    |
| Dy1-O5     | 2.338(11)  | O5-Dy1-O3B   | 82.5(3)    | O5-Dy2-O5B    | 63.1(3)    |
| Dy1-O3     | 2.345(4)   | O3-Dy1-O3B   | 144.7(2)   | Dy2C-Dy2-O5C  | 51.9(3)    |
| Dy1-O3B    | 2.364(4)   | O1-Dy1-O5B   | 133.3(3)   | O5D-Dy2-O5C   | 63.1(3)    |
| Dy1-O5B    | 2.372(11)  | O2-Dy1-O5B   | 136.8(3)   | O5E-Dy2-O5C   | 63.1(3)    |
| Dy1-O5'    | 2.377(11)  | O5-Dy1-O5B   | 56.6(5)    | O5-Dy2-O5C    | 136.3(2)   |
| Dy1-O5'B   | 2.442(11)  | O3-Dy1-O5B   | 80.5(3)    | O5B-Dy2-O5C   | 85.9(4)    |
| Dy1-O4B    | 2.513(4)   | O3B-Dy1-O5B  | 67.0(3)    | Dy2C-Dy2-O5A  | 51.9(3)    |
| Dy1-O4     | 2.573(4)   | O1-Dy1-O5'   | 116.9(3)   | O5D-Dy2-O5A   | 63.1(3)    |
| Dy2-O5D    | 1.852(10)  | O2-Dy1-O5'   | 130.1(3)   | O5E-Dy2-O5A   | 136.3(2)   |
| Dy2-O5E    | 1.852(10)  | O3-Dy1-O5'   | 77.1(3)    | O5-Dy2-O5A    | 63.1(3)    |
| Dy2-O5     | 1.852(10)  | O3B-Dy1-O5'  | 79.8(3)    | O5B-Dy2-O5A   | 85.9(4)    |
| Dy2-O5'D   | 2.253(10)  | O1-Dy1-O5'B  | 132.4(3)   | O5C-Dy2-O5A   | 85.9(4)    |
| Dy2-O5'E   | 2.253(10)  | O2-Dy1-O5'B  | 121.4(3)   | O5D-Dy2-Cl3   | 95.6(4)    |
| Dy2-O5'    | 2.253(10)  | O3-Dy1-O5'B  | 76.9(3)    | O5E-Dy2-Cl3   | 95.6(4)    |
| Dy2-O5B    | 2.341(11)  | O3B-Dy1-O5'B | 75.5(3)    | O5-Dy2-Cl3    | 95.6(4)    |
| Dy2-O5C    | 2.341(11)  | O5'-Dy1-O5'B | 86.7(5)    | O5B-Dy2-Cl3   | 128.1(3)   |
| Dy2-O5A    | 2.341(11)  | O1-Dy1-O4B   | 74.38(15)  | O5C-Dy2-Cl3   | 128.1(3)   |
| Dy2-Cl3    | 2.598(15)  | O2-Dy1-O4B   | 92.16(15)  | O5A-Dy2-Cl3   | 128.1(3)   |
| Dy2-Cl3'   | 2.701(8)   | O5-Dy1-O4B   | 127.6(3)   | Dy2C-Dy2-Cl3' | 165.9(3)   |
| O1-Co1B    | 2.061(4)   | O3-Dy1-O4B   | 118.39(14) | O5'D-Dy2-Cl3' | 72.4(4)    |
| O3-Dy1A    | 2.364(4)   | O3B-Dy1-O4B  | 65.39(14)  | O5'E-Dy2-Cl3' | 72.7(4)    |
| O4-Dy1A    | 2.513(4)   | O5B-Dy1-O4B  | 72.6(3)    | O5'-Dy2-Cl3'  | 93.5(4)    |
| O5-Dy2C    | 2.342(11)  | O5'-Dy1-O4B  | 137.2(3)   | Co1B-O1-Dy1   | 94.22(16)  |
| O5-Dy1A    | 2.372(11)  | O5'B-Dy1-O4B | 61.9(3)    | Co1-O2-Dy1    | 95.51(16)  |
| O5'-Dy1A   | 2.442(11)  | O1-Dy1-O4    | 92.90(15)  | Co1-O3-Dy1    | 92.03(16)  |
| O2-Co1-O1A | 159.08(17) | O2-Dy1-O4    | 69.95(14)  | Co1-O3-Dy1A   | 90.13(15)  |
| O2-Co1-N1  | 95.8(2)    | O5-Dy1-O4    | 72.0(3)    | Dy1-O3-Dy1A   | 102.41(17) |
| O1A-Co1-N1 | 96.2(2)    | O3-Dy1-O4    | 64.67(14)  | Co1-O4-Dy1A   | 85.31(15)  |
| O2-Co1-N2  | 99.5(2)    | O3B-Dy1-O4   | 124.72(14) | Co1-O4-Dy1    | 85.04(15)  |
| O1A-Co1-N2 | 96.5(2)    | O5B-Dy1-O4   | 126.0(3)   | Dy1A-O4-Dy1   | 92.38(14)  |
| N1-Co1-N2  | 94.8(2)    | O5'-Dy1-O4   | 61.8(3)    | Dy2-O5-Dy1    | 126.4(5)   |
| O2-Co1-O3  | 81.09(16)  | O5'B-Dy1-O4  | 134.1(3)   | Dy2-O5-Dy2C   | 43.7(2)    |
| O1A-Co1-O3 | 78.78(16)  | O4B-Dy1-O4   | 160.39(15) | Dy1-O5-Dy2C   | 107.4(4)   |
| N1-Co1-O3  | 109.4(2)   | Dy2C-Dy2-O5D | 84.4(4)    | Dy2-O5-Dy1A   | 125.9(5)   |

|            |           |               |            |              |          |
|------------|-----------|---------------|------------|--------------|----------|
| N2-Co1-O3  | 155.6(2)  | Dy2C-Dy2-O5E  | 84.4(4)    | Dy1-O5-Dy1A  | 102.4(4) |
| O2-Co1-O4  | 83.08(17) | O5D-Dy2-O5E   | 119.05(12) | Dy2C-O5-Dy1A | 105.2(4) |
| O1A-Co1-O4 | 86.72(17) | Dy2C-Dy2-O5   | 84.4(4)    | Dy2-O5'-Dy1  | 108.0(4) |
| N1-Co1-O4  | 173.9(2)  | O5D-Dy2-O5    | 119.05(12) | Dy2-O5'-Dy1A | 106.8(4) |
| N2-Co1-O4  | 79.47(19) | O5E-Dy2-O5    | 119.06(12) | Dy1-O5'-Dy1A | 99.2(4)  |
| O3-Co1-O4  | 76.40(17) | Dy2C-Dy2-O5'D | 100.7(3)   |              |          |

Symmetry transformations used to generate equivalent atoms: A)  $y + 1/2, z, -x + 1/2$ ; B)  $-z + 1/2, x - 1/2, y$ ; C)  $-x + 1, -y, -z$ ; D)  $z + 1/2, -x + 1/2, -y$ ; E)  $-y + 1/2, -z, x - 1/2$

**Table S3** Selected bond lengths (Å) and angles (°) for complex **2**

|           |            |              |            |              |           |
|-----------|------------|--------------|------------|--------------|-----------|
| Dy1-O2    | 2.250(5)   | O3A-Dy1-O5B  | 81.4(3)    | O5C-Dy2-O5E  | 56.8(2)   |
| Dy1-O1    | 2.251(5)   | O2-Dy1-O3    | 69.71(19)  | O5D-Dy2-O5E  | 56.8(2)   |
| Dy1-O5    | 2.322(8)   | O1-Dy1-O3    | 143.63(18) | O5-Dy2-O5E   | 124.8(3)  |
| Dy1-O3A   | 2.340(6)   | O5-Dy1-O3    | 83.4(3)    | O5A-Dy2-O5E  | 84.3(3)   |
| Dy1-O5B   | 2.343(9)   | O3A-Dy1-O3   | 143.1(3)   | O5B-Dy2-O5E  | 84.3(3)   |
| Dy1-O3    | 2.386(6)   | O5B-Dy1-O3   | 63.8(3)    | O5C-Dy2-Cl3C | 98.1(4)   |
| Dy1-O4    | 2.451(5)   | O2-Dy1-O4    | 73.00(17)  | O5D-Dy2-Cl3C | 98.1(4)   |
| Dy1-O5'   | 2.475(10)  | O1-Dy1-O4    | 92.19(18)  | O5-Dy2-Cl3C  | 121.3(4)  |
| Dy1-O5'B  | 2.533(10)  | O5-Dy1-O4    | 127.4(3)   | O5A-Dy2-Cl3C | 135.3(3)  |
| Dy1-O4A   | 2.592(5)   | O3A-Dy1-O4   | 120.43(19) | O5B-Dy2-Cl3C | 135.4(3)  |
| Dy1-Ni1   | 3.1578(10) | O5B-Dy1-O4   | 75.8(3)    | O5E-Dy2-Cl3C | 114.0(3)  |
| Dy1-Ni1A  | 3.2016(10) | O3-Dy1-O4    | 64.44(19)  | N2-Ni1-O2    | 96.87(19) |
| Dy1-H(51) | 2.4715     | O2-Dy1-O5'   | 110.9(3)   | N2-Ni1-O3    | 157.1(3)  |
| Dy2-O5C   | 1.896(9)   | O1-Dy1-O5'   | 130.3(3)   | O2-Ni1-O3    | 80.2(2)   |
| Dy2-O5D   | 1.896(9)   | O3A-Dy1-O5'  | 80.5(3)    | N2-Ni1-O1B   | 95.9(2)   |
| Dy2-O5    | 1.896(9)   | O3-Dy1-O5'   | 77.1(3)    | O2-Ni1-O1B   | 159.7(2)  |
| Dy2-Dy2E  | 2.010(3)   | O4-Dy1-O5'   | 137.5(3)   | O3-Ni1-O1B   | 81.9(2)   |
| Dy2-Cl3'  | 2.09(3)    | O2-Dy1-O5'B  | 133.9(2)   | N2-Ni1-N1'   | 95.3(7)   |
| Dy2-O5'D  | 2.282(10)  | O1-Dy1-O5'B  | 117.1(3)   | O2-Ni1-N1'   | 96.7(6)   |
| Dy2-O5'C  | 2.282(10)  | O3A-Dy1-O5'B | 73.7(3)    | O3-Ni1-N1'   | 107.6(7)  |
| Dy2-O5'   | 2.282(9)   | O3-Dy1-O5'B  | 78.4(3)    | O1B-Ni1-N1'  | 97.7(7)   |
| Dy2-O5A   | 2.351(10)  | O4-Dy1-O5'B  | 63.3(2)    | N2-Ni1-O4    | 80.6(2)   |
| Dy2-O5B   | 2.351(10)  | O5'-Dy1-O5'B | 92.7(5)    | O2-Ni1-O4    | 84.6(2)   |
| Dy2-O5E   | 2.351(10)  | O2-Dy1-O4A   | 93.99(17)  | O3-Ni1-O4    | 76.5(3)   |
| Dy2-Cl3C  | 2.741(10)  | O1-Dy1-O4A   | 68.53(16)  | O1B-Ni1-O4   | 82.1(2)   |
| Ni1-N2    | 2.037(4)   | O5-Dy1-O4A   | 73.4(3)    | N1'-Ni1-O4   | 175.9(7)  |
| Ni1-O2    | 2.057(5)   | O3A-Dy1-O4A  | 62.82(18)  | N2-Ni1-N1    | 102.7(8)  |
| Ni1-O3    | 2.061(5)   | O5B-Dy1-O4A  | 124.2(2)   | O2-Ni1-N1    | 94.7(7)   |
| Ni1-O1B   | 2.069(5)   | O3-Dy1-O4A   | 127.19(19) | O3-Ni1-N1    | 100.2(8)  |
| Ni1-N1'   | 2.08(2)    | O4-Dy1-O4A   | 159.05(18) | O1B-Ni1-N1   | 97.8(8)   |
| Ni1-O4    | 2.106(5)   | O5'-Dy1-O4A  | 62.1(2)    | O4-Ni1-N1    | 176.7(8)  |
| Ni1-N1    | 2.29(3)    | O5'B-Dy1-O4A | 132.1(2)   | Ni1A-O1-Dy1  | 95.56(19) |
| Ni1-Dy1B  | 3.2017(10) | O5C-Dy2-O5D  | 112.7(3)   | Ni1-O2-Dy1   | 94.20(19) |

|            |            |               |            |              |           |
|------------|------------|---------------|------------|--------------|-----------|
| O1-Ni1A    | 2.069(5)   | O5C-Dy2-O5    | 112.7(3)   | Ni1-O3-Dy1   | 90.2(2)   |
| O3-Dy1B    | 2.340(6)   | O5D-Dy2-O5    | 112.7(3)   | Dy1B-O3-Dy1  | 101.9(3)  |
| O4-Dy1B    | 2.592(5)   | Cl3'-Dy2-O5'D | 79.4(3)    | Ni1-O4-Dy1   | 87.39(19) |
| O5-Dy1A    | 2.342(9)   | Cl3'-Dy2-O5'C | 79.4(3)    | Ni1-O4-Dy1B  | 85.26(19) |
| O5-Dy2E    | 2.351(10)  | O5'D-Dy2-O5'C | 116.71(18) | Dy1-O4-Dy1B  | 93.41(19) |
| O5'-Dy1A   | 2.533(10)  | Cl3'-Dy2-O5'  | 79.4(3)    | Dy2-O5-Dy1   | 127.7(4)  |
| O2-Dy1-O1  | 77.15(18)  | O5'D-Dy2-O5'  | 116.71(18) | Dy2-O5-Dy1A  | 128.3(4)  |
| O2-Dy1-O5  | 134.4(3)   | O5'C-Dy2-O5'  | 116.71(18) | Dy1-O5-Dy1A  | 103.8(3)  |
| O1-Dy1-O5  | 132.0(3)   | O5C-Dy2-O5A   | 124.8(3)   | Dy2-O5-Dy2E  | 55.2(3)   |
| O2-Dy1-O3A | 146.69(18) | O5D-Dy2-O5A   | 56.8(2)    | Dy1-O5-Dy2E  | 109.7(4)  |
| O1-Dy1-O3A | 72.26(19)  | O5-Dy2-O5A    | 56.8(2)    | Dy1A-O5-Dy2E | 107.8(4)  |
| O5-Dy1-O3A | 64.8(3)    | O5C-Dy2-O5B   | 56.8(2)    | Dy2-O5'-Dy1  | 105.6(4)  |
| O2-Dy1-O5B | 131.7(2)   | O5D-Dy2-O5B   | 124.8(3)   | Dy2-O5'-Dy1A | 104.9(4)  |
| O1-Dy1-O5B | 140.1(3)   | O5-Dy2-O5B    | 56.8(2)    | Dy1-O5'-Dy1A | 94.3(4)   |
| O5-Dy1-O5B | 52.4(4)    | O5A-Dy2-O5B   | 84.3(3)    |              |           |

Symmetry transformations used to generate equivalent atoms: A)  $y + 1/3$ ,  $-x + y + 2/3$ ,  $-z + 2/3$ ; B)  $x - y + 1/3$ ,  $x - 1/3$ ,  $-z + 2/3$ ; C)  $-y + 1$ ,  $x - y$ ,  $z$ ; D)  $-x + y + 1$ ,  $-x + 1$ ,  $z$ ; E)  $-x + 4/3$ ,  $-y + 2/3$ ,  $-z + 2/3$ .

**Table S4** Selected bond lengths (Å) and angles (°) for complex **3**

|          |            |              |          |              |          |
|----------|------------|--------------|----------|--------------|----------|
| Tb1-O2   | 2.254(6)   | O3A-Tb1-O5B  | 81.9(3)  | O5-Tb2-O5B   | 57.5(3)  |
| Tb1-O1   | 2.262(6)   | O2-Tb1-O3    | 69.9(2)  | O5A-Tb2-O5B  | 84.5(4)  |
| Tb1-O5   | 2.330(11)  | O1-Tb1-O3    | 143.6(2) | O5C-Tb2-O5E  | 57.5(3)  |
| Tb1-O3A  | 2.351(7)   | O5-Tb1-O3    | 83.2(3)  | O5D-Tb2-O5E  | 57.5(3)  |
| Tb1-O5B  | 2.364(11)  | O3A-Tb1-O3   | 143.6(3) | O5-Tb2-O5E   | 126.0(3) |
| Tb1-O3   | 2.401(7)   | O5B-Tb1-O3   | 64.0(3)  | O5A-Tb2-O5E  | 84.5(4)  |
| Tb1-O5'  | 2.469(13)  | O2-Tb1-O5'   | 112.9(4) | O5B-Tb2-O5E  | 84.5(4)  |
| Tb1-O4   | 2.482(7)   | O1-Tb1-O5'   | 130.0(3) | O5C-Tb2-Cl3C | 96.8(5)  |
| Tb1-O5'B | 2.519(13)  | O3A-Tb1-O5'  | 79.6(4)  | O5D-Tb2-Cl3C | 97.1(5)  |
| Tb1-O4A  | 2.596(7)   | O3-Tb1-O5'   | 77.6(3)  | O5-Tb2-Cl3C  | 120.2(5) |
| Tb1-Ni1  | 3.1758(13) | O2-Tb1-O4    | 71.9(2)  | O5A-Tb2-Cl3C | 135.4(4) |
| Tb1-Ni1A | 3.2112(13) | O1-Tb1-O4    | 92.8(2)  | O5B-Tb2-Cl3C | 135.1(4) |
| Tb2-O5C  | 1.908(11)  | O5-Tb1-O4    | 127.3(3) | O5E-Tb2-Cl3C | 113.8(4) |
| Tb2-O5D  | 1.908(11)  | O3A-Tb1-O4   | 121.3(2) | N2-Ni1-O2    | 96.6(3)  |
| Tb2-O5   | 1.908(11)  | O5B-Tb1-O4   | 75.1(3)  | N2-Ni1-O1B   | 96.0(3)  |
| Tb2-Tb2E | 1.987(4)   | O3-Tb1-O4    | 63.9(2)  | O2-Ni1-O1B   | 159.9(3) |
| Tb2-Cl3' | 2.11(4)    | O5'-Tb1-O4   | 137.1(3) | N2-Ni1-O3    | 157.5(3) |
| Tb2-O5'D | 2.298(13)  | O2-Tb1-O5'B  | 132.7(3) | O2-Ni1-O3    | 80.6(2)  |
| Tb2-O5'C | 2.298(13)  | O1-Tb1-O5'B  | 118.1(4) | O1B-Ni1-O3   | 81.7(3)  |
| Tb2-O5'  | 2.298(13)  | O3A-Tb1-O5'B | 75.0(3)  | N2-Ni1-O4    | 80.8(3)  |
| Tb2-O5A  | 2.374(13)  | O3-Tb1-O5'B  | 77.7(4)  | O2-Ni1-O4    | 84.3(3)  |
| Tb2-O5B  | 2.374(13)  | O5'-Tb1-O5'B | 91.8(6)  | O1B-Ni1-O4   | 82.4(3)  |
| Tb2-O5E  | 2.374(13)  | O4-Tb1-O5'B  | 63.1(3)  | O3-Ni1-O4    | 76.7(3)  |

|            |            |               |          |              |          |
|------------|------------|---------------|----------|--------------|----------|
| Tb2-Cl3C   | 2.716(14)  | O2-Tb1-O4A    | 94.2(2)  | N2-Ni1-N1    | 99.1(4)  |
| Ni1-N2     | 2.031(6)   | O1-Tb1-O4A    | 68.4(2)  | O2-Ni1-N1    | 95.7(3)  |
| Ni1-O2     | 2.059(6)   | O5-Tb1-O4A    | 73.5(3)  | O1B-Ni1-N1   | 97.6(3)  |
| Ni1-O1B    | 2.070(6)   | O3A-Tb1-O4A   | 62.8(2)  | O3-Ni1-N1    | 103.5(5) |
| Ni1-O3     | 2.071(7)   | O5B-Tb1-O4A   | 125.0(3) | O4-Ni1-N1    | 179.8(4) |
| Ni1-O4     | 2.096(7)   | O3-Tb1-O4A    | 126.8(2) | Ni1A-O1-Tb1  | 95.6(2)  |
| Ni1-N1     | 2.144(13)  | O5'-Tb1-O4A   | 62.2(3)  | Ni1-O2-Tb1   | 94.7(2)  |
| Ni1-Tb1B   | 3.2112(13) | O4-Tb1-O4A    | 159.2(2) | Ni1-O3-Tb1B  | 92.9(3)  |
| O1-Ni1A    | 2.070(6)   | O5'B-Tb1-O4A  | 133.0(3) | Ni1-O3-Tb1   | 90.2(2)  |
| O3-Tb1B    | 2.351(7)   | O5C-Tb2-O5D   | 113.6(3) | Tb1B-O3-Tb1  | 102.1(3) |
| O4-Tb1B    | 2.596(7)   | O5C-Tb2-O5    | 113.6(3) | Ni1-O4-Tb1   | 87.4(3)  |
| O5-Tb1A    | 2.364(11)  | O5D-Tb2-O5    | 113.6(3) | Ni1-O4-Tb1B  | 85.7(2)  |
| O5-Tb2E    | 2.374(13)  | Cl3'-Tb2-O5'D | 80.1(4)  | Tb1-O4-Tb1B  | 93.4(2)  |
| O5'-Tb1A   | 2.518(13)  | Cl3'-Tb2-O5'C | 80.1(4)  | Tb2-O5-Tb1   | 128.1(5) |
| O2-Tb1-O1  | 76.5(2)    | O5'D-Tb2-O5'C | 117.1(2) | Tb2-O5-Tb1A  | 127.6(6) |
| O2-Tb1-O5  | 135.0(4)   | Cl3'-Tb2-O5'  | 80.1(4)  | Tb1-O5-Tb1A  | 103.9(4) |
| O1-Tb1-O5  | 132.1(3)   | O5'D-Tb2-O5'  | 117.1(2) | Tb2-O5-Tb2E  | 54.0(3)  |
| O2-Tb1-O3A | 146.0(2)   | O5'C-Tb2-O5'  | 117.1(2) | Tb1-O5-Tb2E  | 109.4(5) |
| O1-Tb1-O3A | 71.9(2)    | O5C-Tb2-O5A   | 126.0(3) | Tb1A-O5-Tb2E | 107.3(5) |
| O5-Tb1-O3A | 65.3(4)    | O5D-Tb2-O5A   | 57.5(3)  | Tb2-O5'-Tb1  | 106.3(5) |
| O2-Tb1-O5B | 131.6(3)   | O5-Tb2-O5A    | 57.5(3)  | Tb2-O5'-Tb1A | 105.6(5) |
| O1-Tb1-O5B | 139.8(4)   | O5C-Tb2-O5B   | 57.5(3)  | Tb1-O5'-Tb1A | 95.7(5)  |
| O5-Tb1-O5B | 53.1(5)    | O5D-Tb2-O5B   | 126.0(3) |              |          |

Symmetry transformations used to generate equivalent atoms: A)  $y + 1/3, -x + y + 2/3, -z + 2/3$ ; B)  $x - y + 1/3, x - 1/3, -z + 2/3$ ; C)  $-y + 1, x - y, z$ ; D)  $-x + y + 1, -x + 1, z$ ; E)  $-x + 4/3, -y + 2/3, -z + 2/3$ .
