# Supplementary material for: Russian Doll-like 3d–4f Cluster Wheels with Slow Relaxation of Magnetization
Source: Molecules. 2023 Aug 6;28(15):5906. doi: 10.3390/molecules28155906 (PMC10421525; doi:10.3390/molecules28155906)
Supplement: Supplementary file 1 [file molecules-28-05906-s001.zip]

Archive with 7 entries (7 files):
- CCDC 2252491.cif
- CCDC 2252492.cif
- CCDC 2252493.cif
- checkcif of 1.pdf
- checkcif of 2.pdf
- checkcif of 3.pdf
- Supplementary materials of molecules-2547928.pdf
