# Supplementary material for: Russian Doll-like 3d–4f Cluster Wheels with Slow Relaxation of Magnetization
Source: Molecules. 2023 Aug 6;28(15):5906. doi: 10.3390/molecules28155906 (PMC10421525; doi:10.3390/molecules28155906)
Supplement: Supplementary file 1 [file molecules-28-05906-s001.zip › CCDC 2252491.cif]

 
data_106-Pa-3
 
_audit_creation_method            'SHELXL-2014/7'
_shelx_SHELXL_version_number      '2014/7'
_chemical_name_systematic         ?
_chemical_name_common             ?
_chemical_melting_point           ?
_chemical_formula_moiety          
 'C144 H114 Cl13 Co6 Dy7 N12 O30, 2(Cl), 3(H2 O)'
_chemical_formula_sum
 'C144 H120 Cl15 Co6 Dy7 N12 O33' 
_chemical_formula_weight          4569.34

loop_
 _atom_type_symbol
 _atom_type_description
 _atom_type_scat_dispersion_real
 _atom_type_scat_dispersion_imag
 _atom_type_scat_source
 'C'  'C'   0.0033   0.0016
 'International Tables Vol C Tables 4.2.6.8 and 6.1.1.4'
 'H'  'H'   0.0000   0.0000
 'International Tables Vol C Tables 4.2.6.8 and 6.1.1.4'
 'N'  'N'   0.0061   0.0033
 'International Tables Vol C Tables 4.2.6.8 and 6.1.1.4'
 'O'  'O'   0.0106   0.0060
 'International Tables Vol C Tables 4.2.6.8 and 6.1.1.4'
 'Cl'  'Cl'   0.1484   0.1585
 'International Tables Vol C Tables 4.2.6.8 and 6.1.1.4'
 'Co'  'Co'   0.3494   0.9721
 'International Tables Vol C Tables 4.2.6.8 and 6.1.1.4'
 'Dy'  'Dy'  -0.1892   4.4098
 'International Tables Vol C Tables 4.2.6.8 and 6.1.1.4'
 
_space_group_crystal_system       cubic
_space_group_IT_number            205
_space_group_name_H-M_alt         'P a -3'
_space_group_name_Hall            '-P 2ac 2ab 3'
 
_shelx_space_group_comment
;
The symmetry employed for this shelxl refinement is uniquely defined
by the following loop, which should always be used as a source of
symmetry information in preference to the above space-group names.
They are only intended as comments.
;
 
loop_
 _space_group_symop_operation_xyz
 'x, y, z'
 '-x+1/2, -y, z+1/2'
 '-x, y+1/2, -z+1/2'
 'x+1/2, -y+1/2, -z'
 'z, x, y'
 'z+1/2, -x+1/2, -y'
 '-z+1/2, -x, y+1/2'
 '-z, x+1/2, -y+1/2'
 'y, z, x'
 '-y, z+1/2, -x+1/2'
 'y+1/2, -z+1/2, -x'
 '-y+1/2, -z, x+1/2'
 '-x, -y, -z'
 'x-1/2, y, -z-1/2'
 'x, -y-1/2, z-1/2'
 '-x-1/2, y-1/2, z'
 '-z, -x, -y'
 '-z-1/2, x-1/2, y'
 'z-1/2, x, -y-1/2'
 'z, -x-1/2, y-1/2'
 '-y, -z, -x'
 'y, -z-1/2, x-1/2'
 '-y-1/2, z-1/2, x'
 'y-1/2, z, -x-1/2'
 
_cell_length_a                    25.0221(2)
_cell_length_b                    25.0221(2)
_cell_length_c                    25.0221(2)
_cell_angle_alpha                 90
_cell_angle_beta                  90
_cell_angle_gamma                 90
_cell_volume                      15666.5(4)
_cell_formula_units_Z             4
_cell_measurement_temperature     153(2)
_cell_measurement_reflns_used     11536
_cell_measurement_theta_min       2.0060
_cell_measurement_theta_max       31.0120
 
_exptl_crystal_description        block
_exptl_crystal_colour             ?
_exptl_crystal_density_meas       ?
_exptl_crystal_density_method     ?
_exptl_crystal_density_diffrn     1.937          
_exptl_crystal_F_000              8844
_exptl_transmission_factor_min    ?
_exptl_transmission_factor_max    ?
_exptl_crystal_size_max           0.260
_exptl_crystal_size_mid           0.210
_exptl_crystal_size_min           0.180
_exptl_absorpt_coefficient_mu     4.240
_shelx_estimated_absorpt_T_min    0.405
_shelx_estimated_absorpt_T_max    0.516
_exptl_absorpt_correction_type    multi-scan
_exptl_absorpt_correction_T_min   0.365
_exptl_absorpt_correction_T_max   0.474
_exptl_absorpt_process_details
;
CrysAlisPro 1.171.38.43 (Rigaku Oxford Diffraction, 2015)
Empirical absorption correction using spherical harmonics,
 implemented in SCALE3 ABSPACK scaling algorithm.
;
_exptl_absorpt_special_details    ?
_diffrn_ambient_temperature       153(2)
_diffrn_radiation_wavelength      0.71073
_diffrn_radiation_type            MoK\a
_diffrn_source                    'Rotating-anode X-ray tube'
_diffrn_measurement_device_type   'ROD, Synergy Custom DW system, HyPix'
_diffrn_measurement_method        '\w scans'
_diffrn_detector_area_resol_mean  ?
_diffrn_reflns_number             23685
_diffrn_reflns_av_unetI/netI      0.0237
_diffrn_reflns_av_R_equivalents   0.0331
_diffrn_reflns_limit_h_min        -19
_diffrn_reflns_limit_h_max        29
_diffrn_reflns_limit_k_min        -29
_diffrn_reflns_limit_k_max        29
_diffrn_reflns_limit_l_min        -29
_diffrn_reflns_limit_l_max        16
_diffrn_reflns_theta_min          1.820
_diffrn_reflns_theta_max          25.007
_diffrn_reflns_theta_full         25.007
_diffrn_measured_fraction_theta_max   1.000
_diffrn_measured_fraction_theta_full  1.000
_diffrn_reflns_Laue_measured_fraction_max    1.000
_diffrn_reflns_Laue_measured_fraction_full   1.000
_diffrn_reflns_point_group_measured_fraction_max   1.000
_diffrn_reflns_point_group_measured_fraction_full  1.000
_reflns_number_total              4622
_reflns_number_gt                 3962
_reflns_threshold_expression      'I > 2\s(I)'
_reflns_Friedel_coverage          0.000
_reflns_Friedel_fraction_max      .
_reflns_Friedel_fraction_full     .
 
_reflns_special_details
;
 Reflections were merged by SHELXL according to the crystal
 class for the calculation of statistics and refinement.
 
 _reflns_Friedel_fraction is defined as the number of unique
 Friedel pairs measured divided by the number that would be
 possible theoretically, ignoring centric projections and
 systematic absences.
;
 
_computing_data_collection        'CrysAlisPro 1.171.38.43 (Rigaku OD, 2015)'
_computing_cell_refinement        'CrysAlisPro 1.171.38.43 (Rigaku OD, 2015)'
_computing_data_reduction         'CrysAlisPro 1.171.38.43 (Rigaku OD, 2015)'
_computing_structure_solution     'SHELXS-97 (Sheldrick, 2008)'
_computing_structure_refinement   'SHELXL-2014/7 (Sheldrick, 2014)'
_computing_molecular_graphics     ?
_computing_publication_material   ?
_refine_special_details           ?
_refine_ls_structure_factor_coef  Fsqd
_refine_ls_matrix_type            full
_refine_ls_weighting_scheme       calc
_refine_ls_weighting_details
'w=1/[\s^2^(Fo^2^)+(0.0533P)^2^+91.8458P] where P=(Fo^2^+2Fc^2^)/3'
_atom_sites_solution_primary      ?
_atom_sites_solution_secondary    ?
_atom_sites_solution_hydrogens    mixed
_refine_ls_hydrogen_treatment     constr
_refine_ls_extinction_method      none
_refine_ls_extinction_coef        .
_refine_ls_number_reflns          4622
_refine_ls_number_parameters      314
_refine_ls_number_restraints      75
_refine_ls_R_factor_all           0.0475
_refine_ls_R_factor_gt            0.0377
_refine_ls_wR_factor_ref          0.1108
_refine_ls_wR_factor_gt           0.1020
_refine_ls_goodness_of_fit_ref    1.069
_refine_ls_restrained_S_all       1.066
_refine_ls_shift/su_max           0.001
_refine_ls_shift/su_mean          0.000
 
loop_
 _atom_site_label
 _atom_site_type_symbol
 _atom_site_fract_x
 _atom_site_fract_y
 _atom_site_fract_z
 _atom_site_U_iso_or_equiv
 _atom_site_adp_type
 _atom_site_occupancy
 _atom_site_site_symmetry_order  
 _atom_site_calc_flag
 _atom_site_refinement_flags_posn
 _atom_site_refinement_flags_adp
 _atom_site_refinement_flags_occupancy
 _atom_site_disorder_assembly
 _atom_site_disorder_group
Co1 Co 0.63182(3) 0.15168(3) 0.10137(3) 0.0326(2) Uani 1 1 d . . . . .
Dy1 Dy 0.51050(2) 0.11035(2) 0.09598(2) 0.03075(12) Uani 1 1 d . . . . .
Dy2 Dy 0.48125(2) 0.01875(2) -0.01875(2) 0.0293(2) Uani 0.5 3 d DS T P . .
O1 O 0.46165(17) 0.17941(17) 0.12825(17) 0.0350(10) Uani 1 1 d . . . . .
O2 O 0.56749(17) 0.15357(17) 0.15228(17) 0.0345(10) Uani 1 1 d . . . . .
C1 C 0.47049(16) 0.23225(11) 0.13781(17) 0.0352(14) Uani 1 1 d G . . . .
C2 C 0.44559(16) 0.26933(16) 0.10478(15) 0.0415(16) Uani 1 1 d G . . . .
H2 H 0.4226 0.2576 0.0770 0.050 Uiso 1 1 calc R U . . .
C3 C 0.45436(19) 0.32365(14) 0.11243(18) 0.0503(18) Uani 1 1 d G . . . .
H3 H 0.4373 0.3490 0.0899 0.060 Uiso 1 1 calc R U . . .
C4 C 0.48803(19) 0.34088(11) 0.1531(2) 0.0516(19) Uani 1 1 d G . . . .
H4 H 0.4940 0.3780 0.1583 0.062 Uiso 1 1 calc R U . . .
C5 C 0.51293(17) 0.30380(16) 0.18614(16) 0.0462(17) Uani 1 1 d G . . . .
H5 H 0.5359 0.3156 0.2140 0.055 Uiso 1 1 calc R U . . .
C6 C 0.50416(16) 0.24949(14) 0.17849(15) 0.0349(14) Uani 1 1 d DG . . . .
C7 C 0.52946(16) 0.21126(14) 0.21913(13) 0.0340(14) Uani 1 1 d DG . . . .
C8 C 0.52246(16) 0.22366(14) 0.27282(15) 0.0415(16) Uani 1 1 d G . . . .
H8 H 0.5018 0.2539 0.2828 0.050 Uiso 1 1 calc R U . . .
C9 C 0.54572(18) 0.19182(18) 0.31195(11) 0.0433(16) Uani 1 1 d G . . . .
H9 H 0.5409 0.2003 0.3486 0.052 Uiso 1 1 calc R U . . .
C10 C 0.57598(17) 0.14757(16) 0.29738(13) 0.0415(16) Uani 1 1 d G . . . .
H10 H 0.5919 0.1258 0.3241 0.050 Uiso 1 1 calc R U . . .
C11 C 0.58298(16) 0.13517(14) 0.24368(15) 0.0377(15) Uani 1 1 d G . . . .
H11 H 0.6037 0.1049 0.2337 0.045 Uiso 1 1 calc R U . . .
C12 C 0.55972(16) 0.16701(15) 0.20456(11) 0.0324(13) Uani 1 1 d G . . . .
O3 O 0.59703(17) 0.07754(17) 0.08121(17) 0.0344(10) Uani 1 1 d . U . . .
C13 C 0.6259(5) 0.0378(4) 0.1127(4) 0.084(3) Uani 1 1 d . U . . .
H13A H 0.6643 0.0409 0.1055 0.126 Uiso 1 1 calc R U . . .
H13B H 0.6136 0.0020 0.1029 0.126 Uiso 1 1 calc R U . . .
H13C H 0.6192 0.0440 0.1508 0.126 Uiso 1 1 calc R U . . .
N1 N 0.6886(2) 0.1403(2) 0.1601(2) 0.0429(13) Uani 1 1 d . U . . .
C14 C 0.7179(3) 0.1449(3) 0.1931(3) 0.0427(15) Uani 1 1 d . U . . .
C15 C 0.7558(4) 0.1504(4) 0.2370(4) 0.081(3) Uani 1 1 d . U . . .
H15A H 0.7758 0.1838 0.2329 0.121 Uiso 1 1 calc R U . . .
H15B H 0.7806 0.1201 0.2367 0.121 Uiso 1 1 calc R U . . .
H15C H 0.7363 0.1510 0.2710 0.121 Uiso 1 1 calc R U . . .
N2 N 0.6460(2) 0.2340(2) 0.0938(2) 0.0442(14) Uani 1 1 d . . . . .
C16 C 0.6839(4) 0.2627(3) 0.1164(3) 0.060(2) Uani 1 1 d D . . . .
H16 H 0.7111 0.2448 0.1359 0.073 Uiso 1 1 calc R U . . .
C17 C 0.6857(4) 0.3181(3) 0.1127(4) 0.074(3) Uani 1 1 d D . . . .
H17 H 0.7140 0.3375 0.1290 0.089 Uiso 1 1 calc R U . . .
C18 C 0.6462(4) 0.3445(3) 0.0853(3) 0.072(3) Uani 1 1 d D . . . .
H18 H 0.6456 0.3824 0.0839 0.086 Uiso 1 1 calc R U . . .
C19 C 0.6066(2) 0.31422(16) 0.0593(2) 0.058(2) Uani 1 1 d DG . . . .
C20 C 0.60817(17) 0.25889(17) 0.06401(17) 0.0429(16) Uani 1 1 d G . . . .
C21 C 0.57110(18) 0.22764(13) 0.03690(18) 0.0391(15) Uani 1 1 d G . . . .
C22 C 0.53243(17) 0.2517(2) 0.00512(18) 0.0511(19) Uani 1 1 d G . . . .
C23 C 0.53083(19) 0.3071(2) 0.0004(2) 0.065(2) Uani 1 1 d G . . . .
H23 H 0.5044 0.3235 -0.0213 0.078 Uiso 1 1 calc R U . . .
C24 C 0.5679(2) 0.33831(14) 0.0275(2) 0.064(2) Uani 1 1 d G . . . .
Cl1 Cl 0.56369(15) 0.40810(10) 0.02205(12) 0.0976(10) Uani 1 1 d . . . . .
Cl2 Cl 0.48739(9) 0.21489(12) -0.03028(9) 0.0783(7) Uani 1 1 d . . . . .
O4 O 0.57258(17) 0.17247(18) 0.04247(17) 0.0363(10) Uani 1 1 d . . . . .
O5 O 0.5204(4) 0.0744(4) 0.0103(4) 0.033(2) Uani 0.5 1 d . U P . 1
H51 H 0.4996 0.0942 -0.0102 0.050 Uiso 0.5 1 d R U P . 1
O5' O 0.5136(4) 0.1003(4) 0.0016(4) 0.033(2) Uani 0.5 1 d . U P . 2
H52 H 0.4977 0.1247 -0.0144 0.049 Uiso 0.5 1 d R U P . 2
Cl3 Cl 0.4213(3) 0.0787(3) -0.0787(3) 0.024(2) Uani 0.165(7) 3 d S T P . 1
Cl3' Cl 0.4085(4) 0.0578(6) -0.0883(4) 0.024(2) Uani 0.112(2) 1 d D U P . 2
Cl4 Cl 0.78705(9) 0.28705(9) 0.21295(9) 0.0602(9) Uani 1 3 d S T P . .
O7 O 0.4226(6) 0.3473(7) 0.2909(8) 0.117(6) Uani 0.5 1 d . . P . .
H71 H 0.4020 0.3537 0.3225 0.176 Uiso 0.5 1 d R U P . .
H72 H 0.4305 0.3840 0.2894 0.176 Uiso 0.5 1 d R U P . .
 
loop_
 _atom_site_aniso_label
 _atom_site_aniso_U_11
 _atom_site_aniso_U_22
 _atom_site_aniso_U_33
 _atom_site_aniso_U_23
 _atom_site_aniso_U_13
 _atom_site_aniso_U_12
Co1 0.0317(4) 0.0361(5) 0.0298(4) -0.0028(3) -0.0021(3) -0.0037(4)
Dy1 0.02976(17) 0.03158(18) 0.03091(18) -0.00885(12) 0.00457(11) -0.00499(12)
Dy2 0.0293(2) 0.0293(2) 0.0293(2) -0.0069(3) 0.0069(3) -0.0069(3)
O1 0.034(2) 0.032(2) 0.039(2) -0.0068(19) -0.0012(19) 0.0003(18)
O2 0.035(2) 0.037(2) 0.031(2) -0.0093(18) -0.0017(18) 0.0030(19)
C1 0.030(3) 0.034(3) 0.041(4) -0.006(3) 0.005(3) -0.002(3)
C2 0.040(4) 0.038(4) 0.046(4) -0.002(3) -0.003(3) 0.003(3)
C3 0.058(5) 0.038(4) 0.054(4) 0.003(3) 0.001(4) 0.012(3)
C4 0.053(4) 0.032(4) 0.071(5) -0.005(4) 0.004(4) -0.003(3)
C5 0.043(4) 0.038(4) 0.057(4) -0.013(3) 0.000(3) -0.002(3)
C6 0.032(3) 0.035(3) 0.037(3) -0.007(3) 0.002(3) 0.005(3)
C7 0.024(3) 0.030(3) 0.049(4) -0.011(3) -0.003(3) 0.000(2)
C8 0.037(4) 0.046(4) 0.041(4) -0.019(3) -0.002(3) 0.006(3)
C9 0.040(4) 0.059(4) 0.031(3) -0.020(3) -0.003(3) 0.004(3)
C10 0.036(3) 0.051(4) 0.037(4) -0.005(3) -0.011(3) 0.006(3)
C11 0.031(3) 0.042(4) 0.040(4) -0.015(3) -0.007(3) 0.005(3)
C12 0.030(3) 0.035(3) 0.031(3) -0.011(3) -0.004(3) -0.004(3)
O3 0.035(2) 0.034(2) 0.034(2) -0.0031(18) 0.0093(18) -0.0027(18)
C13 0.099(8) 0.071(6) 0.082(7) 0.005(5) 0.016(6) 0.005(5)
N1 0.037(3) 0.060(4) 0.032(3) -0.003(3) 0.000(2) -0.001(3)
C14 0.042(4) 0.038(3) 0.048(4) 0.006(3) -0.004(3) -0.004(3)
C15 0.094(7) 0.054(5) 0.095(7) 0.016(5) -0.053(6) -0.011(5)
N2 0.053(4) 0.038(3) 0.041(3) -0.001(3) -0.013(3) -0.014(3)
C16 0.077(6) 0.051(5) 0.053(5) 0.001(4) -0.021(4) -0.019(4)
C17 0.105(8) 0.046(5) 0.071(6) -0.004(4) -0.035(6) -0.028(5)
C18 0.117(8) 0.035(4) 0.063(5) -0.005(4) -0.013(6) -0.013(5)
C19 0.086(6) 0.044(4) 0.043(4) 0.002(4) 0.006(4) 0.003(4)
C20 0.054(4) 0.039(4) 0.036(4) 0.001(3) -0.003(3) -0.003(3)
C21 0.041(4) 0.047(4) 0.030(3) 0.003(3) 0.001(3) 0.006(3)
C22 0.041(4) 0.071(5) 0.041(4) 0.008(4) -0.006(3) 0.003(4)
C23 0.064(5) 0.079(6) 0.052(5) 0.023(5) 0.006(4) 0.028(5)
C24 0.090(7) 0.049(5) 0.054(5) 0.013(4) 0.008(5) 0.014(5)
Cl1 0.146(3) 0.0541(14) 0.0929(19) 0.0254(13) -0.0015(19) 0.0231(16)
Cl2 0.0513(12) 0.126(2) 0.0578(13) 0.0076(13) -0.0241(10) -0.0031(13)
O4 0.035(2) 0.040(2) 0.034(2) -0.0038(19) -0.0061(19) -0.0043(19)
O5 0.033(5) 0.036(5) 0.030(5) -0.003(5) 0.000(4) -0.008(5)
O5' 0.034(5) 0.034(5) 0.030(5) -0.003(4) -0.001(4) -0.006(5)
Cl3 0.024(2) 0.024(2) 0.024(2) -0.0049(19) 0.0049(19) -0.0049(19)
Cl3' 0.024(2) 0.024(2) 0.024(2) -0.0049(19) 0.0049(19) -0.0049(19)
Cl4 0.0602(9) 0.0602(9) 0.0602(9) -0.0029(10) -0.0029(10) 0.0029(10)
O7 0.085(11) 0.111(13) 0.155(17) -0.025(12) -0.001(11) 0.012(10)
 
_geom_special_details
;
 All esds (except the esd in the dihedral angle between two l.s. planes)
 are estimated using the full covariance matrix.  The cell esds are taken
 into account individually in the estimation of esds in distances, angles
 and torsion angles; correlations between esds in cell parameters are only
 used when they are defined by crystal symmetry.  An approximate (isotropic)
 treatment of cell esds is used for estimating esds involving l.s. planes.
;
 
loop_
 _geom_bond_atom_site_label_1
 _geom_bond_atom_site_label_2
 _geom_bond_distance
 _geom_bond_site_symmetry_2
 _geom_bond_publ_flag
Co1 O2 2.053(4) . ?
Co1 O1 2.061(4) 24_656 ?
Co1 N1 2.065(6) . ?
Co1 N2 2.099(6) . ?
Co1 O3 2.110(4) . ?
Co1 O4 2.154(4) . ?
Co1 Dy1 3.1729(9) 24_656 ?
Co1 Dy1 3.2096(9) . ?
Dy1 O1 2.265(4) . ?
Dy1 O2 2.277(4) . ?
Dy1 O5 2.338(11) . ?
Dy1 O3 2.345(4) . ?
Dy1 O3 2.364(4) 18_655 ?
Dy1 O5 2.372(11) 18_655 ?
Dy1 O5' 2.377(11) . ?
Dy1 O5' 2.442(11) 18_655 ?
Dy1 O4 2.513(4) 18_655 ?
Dy1 O4 2.573(4) . ?
Dy1 Co1 3.1729(9) 18_655 ?
Dy2 Dy2 1.626(2) 13_655 ?
Dy2 O5 1.852(10) 6 ?
Dy2 O5 1.852(10) 12_554 ?
Dy2 O5 1.852(10) . ?
Dy2 O5' 2.253(10) 6 ?
Dy2 O5' 2.253(10) 12_554 ?
Dy2 O5' 2.253(10) . ?
Dy2 O5 2.341(11) 18_655 ?
Dy2 O5 2.341(11) 13_655 ?
Dy2 O5 2.341(11) 24_656 ?
Dy2 Cl3 2.598(15) . ?
Dy2 Cl3' 2.701(8) . ?
Dy2 H51 1.9535 . ?
O1 C1 1.362(5) . ?
O1 Co1 2.061(4) 18_655 ?
O2 C12 1.364(5) . ?
C1 C2 1.3900 . ?
C1 C6 1.3900 . ?
C2 C3 1.3900 . ?
C2 H2 0.9500 . ?
C3 C4 1.3900 . ?
C3 H3 0.9500 . ?
C4 C5 1.3900 . ?
C4 H4 0.9500 . ?
C5 C6 1.3900 . ?
C5 H5 0.9500 . ?
C6 C7 1.533(4) . ?
C7 C8 1.3900 . ?
C7 C12 1.3900 . ?
C8 C9 1.3900 . ?
C8 H8 0.9500 . ?
C9 C10 1.3900 . ?
C9 H9 0.9500 . ?
C10 C11 1.3900 . ?
C10 H10 0.9500 . ?
C11 C12 1.3900 . ?
C11 H11 0.9500 . ?
O3 C13 1.459(11) . ?
O3 Dy1 2.364(4) 24_656 ?
C13 H13A 0.9800 . ?
C13 H13B 0.9800 . ?
C13 H13C 0.9800 . ?
N1 C14 1.109(9) . ?
C14 C15 1.458(11) . ?
C15 H15A 0.9800 . ?
C15 H15B 0.9800 . ?
C15 H15C 0.9800 . ?
N2 C16 1.317(9) . ?
N2 C20 1.356(7) . ?
C16 C17 1.391(8) . ?
C16 H16 0.9500 . ?
C17 C18 1.373(8) . ?
C17 H17 0.9500 . ?
C18 C19 1.406(7) . ?
C18 H18 0.9500 . ?
C19 C20 1.3900 . ?
C19 C24 1.3900 . ?
C20 C21 1.3900 . ?
C21 O4 1.388(5) . ?
C21 C22 1.3900 . ?
C22 C23 1.3900 . ?
C22 Cl2 1.704(4) . ?
C23 C24 1.3900 . ?
C23 H23 0.9500 . ?
C24 Cl1 1.755(4) . ?
O4 Dy1 2.513(4) 24_656 ?
O5 Dy2 2.342(11) 13_655 ?
O5 Dy1 2.372(11) 24_656 ?
O5 H51 0.8823 . ?
O5' Dy1 2.442(11) 24_656 ?
O5' H52 0.8318 . ?
Cl3' Cl3' 1.14(3) 6 ?
Cl3' Cl3' 1.14(3) 12_554 ?
O7 H71 0.9570 . ?
O7 H72 0.9395 . ?
 
loop_
 _geom_angle_atom_site_label_1
 _geom_angle_atom_site_label_2
 _geom_angle_atom_site_label_3
 _geom_angle
 _geom_angle_site_symmetry_1
 _geom_angle_site_symmetry_3
 _geom_angle_publ_flag
O2 Co1 O1 159.08(17) . 24_656 ?
O2 Co1 N1 95.8(2) . . ?
O1 Co1 N1 96.2(2) 24_656 . ?
O2 Co1 N2 99.5(2) . . ?
O1 Co1 N2 96.5(2) 24_656 . ?
N1 Co1 N2 94.8(2) . . ?
O2 Co1 O3 81.09(16) . . ?
O1 Co1 O3 78.78(16) 24_656 . ?
N1 Co1 O3 109.4(2) . . ?
N2 Co1 O3 155.6(2) . . ?
O2 Co1 O4 83.08(17) . . ?
O1 Co1 O4 86.72(17) 24_656 . ?
N1 Co1 O4 173.9(2) . . ?
N2 Co1 O4 79.47(19) . . ?
O3 Co1 O4 76.40(17) . . ?
O2 Co1 Dy1 115.14(12) . 24_656 ?
O1 Co1 Dy1 45.40(12) 24_656 24_656 ?
N1 Co1 Dy1 133.15(17) . 24_656 ?
N2 Co1 Dy1 112.33(16) . 24_656 ?
O3 Co1 Dy1 48.18(12) . 24_656 ?
O4 Co1 Dy1 52.12(12) . 24_656 ?
O2 Co1 Dy1 44.94(12) . . ?
O1 Co1 Dy1 115.00(12) 24_656 . ?
N1 Co1 Dy1 129.52(16) . . ?
N2 Co1 Dy1 118.17(17) . . ?
O3 Co1 Dy1 46.89(11) . . ?
O4 Co1 Dy1 53.01(12) . . ?
Dy1 Co1 Dy1 70.203(19) 24_656 . ?
O1 Dy1 O2 75.83(15) . . ?
O1 Dy1 O5 132.6(3) . . ?
O2 Dy1 O5 133.1(3) . . ?
O1 Dy1 O3 145.23(15) . . ?
O2 Dy1 O3 71.68(15) . . ?
O5 Dy1 O3 67.9(3) . . ?
O1 Dy1 O3 69.72(15) . 18_655 ?
O2 Dy1 O3 142.68(14) . 18_655 ?
O5 Dy1 O3 82.5(3) . 18_655 ?
O3 Dy1 O3 144.7(2) . 18_655 ?
O1 Dy1 O5 133.3(3) . 18_655 ?
O2 Dy1 O5 136.8(3) . 18_655 ?
O5 Dy1 O5 56.6(5) . 18_655 ?
O3 Dy1 O5 80.5(3) . 18_655 ?
O3 Dy1 O5 67.0(3) 18_655 18_655 ?
O1 Dy1 O5' 116.9(3) . . ?
O2 Dy1 O5' 130.1(3) . . ?
O3 Dy1 O5' 77.1(3) . . ?
O3 Dy1 O5' 79.8(3) 18_655 . ?
O1 Dy1 O5' 132.4(3) . 18_655 ?
O2 Dy1 O5' 121.4(3) . 18_655 ?
O3 Dy1 O5' 76.9(3) . 18_655 ?
O3 Dy1 O5' 75.5(3) 18_655 18_655 ?
O5' Dy1 O5' 86.7(5) . 18_655 ?
O1 Dy1 O4 74.38(15) . 18_655 ?
O2 Dy1 O4 92.16(15) . 18_655 ?
O5 Dy1 O4 127.6(3) . 18_655 ?
O3 Dy1 O4 118.39(14) . 18_655 ?
O3 Dy1 O4 65.39(14) 18_655 18_655 ?
O5 Dy1 O4 72.6(3) 18_655 18_655 ?
O5' Dy1 O4 137.2(3) . 18_655 ?
O5' Dy1 O4 61.9(3) 18_655 18_655 ?
O1 Dy1 O4 92.90(15) . . ?
O2 Dy1 O4 69.95(14) . . ?
O5 Dy1 O4 72.0(3) . . ?
O3 Dy1 O4 64.67(14) . . ?
O3 Dy1 O4 124.72(14) 18_655 . ?
O5 Dy1 O4 126.0(3) 18_655 . ?
O5' Dy1 O4 61.8(3) . . ?
O5' Dy1 O4 134.1(3) 18_655 . ?
O4 Dy1 O4 160.39(15) 18_655 . ?
O1 Dy1 Co1 40.38(11) . 18_655 ?
O2 Dy1 Co1 101.55(10) . 18_655 ?
O5 Dy1 Co1 124.2(3) . 18_655 ?
O3 Dy1 Co1 160.58(11) . 18_655 ?
O3 Dy1 Co1 41.69(10) 18_655 18_655 ?
O5 Dy1 Co1 93.8(3) 18_655 18_655 ?
O5' Dy1 Co1 118.9(3) . 18_655 ?
O5' Dy1 Co1 92.3(2) 18_655 18_655 ?
O4 Dy1 Co1 42.58(10) 18_655 18_655 ?
O4 Dy1 Co1 131.22(10) . 18_655 ?
O1 Dy1 Co1 104.45(11) . . ?
O2 Dy1 Co1 39.55(11) . . ?
O5 Dy1 Co1 93.6(3) . . ?
O3 Dy1 Co1 41.08(10) . . ?
O3 Dy1 Co1 166.30(11) 18_655 . ?
O5 Dy1 Co1 121.5(3) 18_655 . ?
O5' Dy1 Co1 92.6(3) . . ?
O5' Dy1 Co1 115.7(3) 18_655 . ?
O4 Dy1 Co1 126.02(10) 18_655 . ?
O4 Dy1 Co1 41.96(9) . . ?
Co1 Dy1 Co1 139.59(2) 18_655 . ?
Dy2 Dy2 O5 84.4(4) 13_655 6 ?
Dy2 Dy2 O5 84.4(4) 13_655 12_554 ?
O5 Dy2 O5 119.05(12) 6 12_554 ?
Dy2 Dy2 O5 84.4(4) 13_655 . ?
O5 Dy2 O5 119.05(12) 6 . ?
O5 Dy2 O5 119.06(12) 12_554 . ?
Dy2 Dy2 O5' 100.7(3) 13_655 6 ?
Dy2 Dy2 O5' 100.7(3) 13_655 12_554 ?
O5' Dy2 O5' 116.66(18) 6 12_554 ?
Dy2 Dy2 O5' 100.7(3) 13_655 . ?
O5' Dy2 O5' 116.66(18) 6 . ?
O5' Dy2 O5' 116.66(18) 12_554 . ?
Dy2 Dy2 O5 51.9(3) 13_655 18_655 ?
O5 Dy2 O5 136.3(2) 6 18_655 ?
O5 Dy2 O5 63.1(3) 12_554 18_655 ?
O5 Dy2 O5 63.1(3) . 18_655 ?
Dy2 Dy2 O5 51.9(3) 13_655 13_655 ?
O5 Dy2 O5 63.1(3) 6 13_655 ?
O5 Dy2 O5 63.1(3) 12_554 13_655 ?
O5 Dy2 O5 136.3(2) . 13_655 ?
O5 Dy2 O5 85.9(4) 18_655 13_655 ?
Dy2 Dy2 O5 51.9(3) 13_655 24_656 ?
O5 Dy2 O5 63.1(3) 6 24_656 ?
O5 Dy2 O5 136.3(2) 12_554 24_656 ?
O5 Dy2 O5 63.1(3) . 24_656 ?
O5 Dy2 O5 85.9(4) 18_655 24_656 ?
O5 Dy2 O5 85.9(4) 13_655 24_656 ?
Dy2 Dy2 Cl3 180.0(5) 13_655 . ?
O5 Dy2 Cl3 95.6(4) 6 . ?
O5 Dy2 Cl3 95.6(4) 12_554 . ?
O5 Dy2 Cl3 95.6(4) . . ?
O5 Dy2 Cl3 128.1(3) 18_655 . ?
O5 Dy2 Cl3 128.1(3) 13_655 . ?
O5 Dy2 Cl3 128.1(3) 24_656 . ?
Dy2 Dy2 Cl3' 165.9(3) 13_655 . ?
O5' Dy2 Cl3' 72.4(4) 6 . ?
O5' Dy2 Cl3' 72.7(4) 12_554 . ?
O5' Dy2 Cl3' 93.5(4) . . ?
Dy2 Dy2 H51 111.0 13_655 . ?
O5 Dy2 H51 120.1 6 . ?
O5 Dy2 H51 119.9 12_554 . ?
O5 Dy2 H51 26.6 . . ?
O5 Dy2 H51 81.5 18_655 . ?
O5 Dy2 H51 162.9 13_655 . ?
O5 Dy2 H51 81.7 24_656 . ?
Cl3 Dy2 H51 69.0 . . ?
C1 O1 Co1 129.4(3) . 18_655 ?
C1 O1 Dy1 135.7(3) . . ?
Co1 O1 Dy1 94.22(16) 18_655 . ?
C12 O2 Co1 135.4(3) . . ?
C12 O2 Dy1 128.4(3) . . ?
Co1 O2 Dy1 95.51(16) . . ?
O1 C1 C2 118.1(3) . . ?
O1 C1 C6 121.9(3) . . ?
C2 C1 C6 120.0 . . ?
C3 C2 C1 120.0 . . ?
C3 C2 H2 120.0 . . ?
C1 C2 H2 120.0 . . ?
C2 C3 C4 120.0 . . ?
C2 C3 H3 120.0 . . ?
C4 C3 H3 120.0 . . ?
C5 C4 C3 120.0 . . ?
C5 C4 H4 120.0 . . ?
C3 C4 H4 120.0 . . ?
C4 C5 C6 120.0 . . ?
C4 C5 H5 120.0 . . ?
C6 C5 H5 120.0 . . ?
C5 C6 C1 120.0 . . ?
C5 C6 C7 117.0(3) . . ?
C1 C6 C7 122.9(3) . . ?
C8 C7 C12 120.0 . . ?
C8 C7 C6 116.7(3) . . ?
C12 C7 C6 123.2(3) . . ?
C7 C8 C9 120.0 . . ?
C7 C8 H8 120.0 . . ?
C9 C8 H8 120.0 . . ?
C10 C9 C8 120.0 . . ?
C10 C9 H9 120.0 . . ?
C8 C9 H9 120.0 . . ?
C11 C10 C9 120.0 . . ?
C11 C10 H10 120.0 . . ?
C9 C10 H10 120.0 . . ?
C10 C11 C12 120.0 . . ?
C10 C11 H11 120.0 . . ?
C12 C11 H11 120.0 . . ?
O2 C12 C11 118.3(3) . . ?
O2 C12 C7 121.7(3) . . ?
C11 C12 C7 120.0 . . ?
C13 O3 Co1 105.4(5) . . ?
C13 O3 Dy1 127.6(5) . . ?
Co1 O3 Dy1 92.03(16) . . ?
C13 O3 Dy1 125.9(5) . 24_656 ?
Co1 O3 Dy1 90.13(15) . 24_656 ?
Dy1 O3 Dy1 102.41(17) . 24_656 ?
O3 C13 H13A 109.5 . . ?
O3 C13 H13B 109.5 . . ?
H13A C13 H13B 109.5 . . ?
O3 C13 H13C 109.5 . . ?
H13A C13 H13C 109.5 . . ?
H13B C13 H13C 109.5 . . ?
C14 N1 Co1 165.9(6) . . ?
N1 C14 C15 179.0(9) . . ?
C14 C15 H15A 109.5 . . ?
C14 C15 H15B 109.5 . . ?
H15A C15 H15B 109.5 . . ?
C14 C15 H15C 109.5 . . ?
H15A C15 H15C 109.5 . . ?
H15B C15 H15C 109.5 . . ?
C16 N2 C20 119.2(6) . . ?
C16 N2 Co1 128.1(5) . . ?
C20 N2 Co1 112.5(4) . . ?
N2 C16 C17 122.6(8) . . ?
N2 C16 H16 118.7 . . ?
C17 C16 H16 118.7 . . ?
C18 C17 C16 119.2(8) . . ?
C18 C17 H17 120.4 . . ?
C16 C17 H17 120.4 . . ?
C17 C18 C19 118.7(7) . . ?
C17 C18 H18 120.7 . . ?
C19 C18 H18 120.7 . . ?
C20 C19 C24 120.0 . . ?
C20 C19 C18 118.5(5) . . ?
C24 C19 C18 121.4(5) . . ?
N2 C20 C19 121.6(4) . . ?
N2 C20 C21 118.4(4) . . ?
C19 C20 C21 120.0 . . ?
O4 C21 C22 120.5(3) . . ?
O4 C21 C20 119.5(3) . . ?
C22 C21 C20 120.0 . . ?
C21 C22 C23 120.0 . . ?
C21 C22 Cl2 121.5(3) . . ?
C23 C22 Cl2 118.4(3) . . ?
C24 C23 C22 120.0 . . ?
C24 C23 H23 120.0 . . ?
C22 C23 H23 120.0 . . ?
C23 C24 C19 120.0 . . ?
C23 C24 Cl1 118.8(3) . . ?
C19 C24 Cl1 121.2(3) . . ?
C21 O4 Co1 109.1(3) . . ?
C21 O4 Dy1 135.6(3) . 24_656 ?
Co1 O4 Dy1 85.31(15) . 24_656 ?
C21 O4 Dy1 129.6(3) . . ?
Co1 O4 Dy1 85.04(15) . . ?
Dy1 O4 Dy1 92.38(14) 24_656 . ?
Dy2 O5 Dy1 126.4(5) . . ?
Dy2 O5 Dy2 43.7(2) . 13_655 ?
Dy1 O5 Dy2 107.4(4) . 13_655 ?
Dy2 O5 Dy1 125.9(5) . 24_656 ?
Dy1 O5 Dy1 102.4(4) . 24_656 ?
Dy2 O5 Dy1 105.2(4) 13_655 24_656 ?
Dy2 O5 H51 83.1 . . ?
Dy1 O5 H51 104.8 . . ?
Dy2 O5 H51 126.8 13_655 . ?
Dy1 O5 H51 107.8 24_656 . ?
Dy2 O5' Dy1 108.0(4) . . ?
Dy2 O5' Dy1 106.8(4) . 24_656 ?
Dy1 O5' Dy1 99.2(4) . 24_656 ?
Dy2 O5' H52 112.6 . . ?
Dy1 O5' H52 112.6 . . ?
Dy1 O5' H52 116.6 24_656 . ?
Cl3' Cl3' Cl3' 60.000(3) 6 12_554 ?
Cl3' Cl3' Dy2 77.8(3) 6 . ?
Cl3' Cl3' Dy2 77.8(3) 12_554 . ?
H71 O7 H72 88.9 . . ?
 
loop_
 _geom_torsion_atom_site_label_1
 _geom_torsion_atom_site_label_2
 _geom_torsion_atom_site_label_3
 _geom_torsion_atom_site_label_4
 _geom_torsion
 _geom_torsion_site_symmetry_1
 _geom_torsion_site_symmetry_2
 _geom_torsion_site_symmetry_3
 _geom_torsion_site_symmetry_4
 _geom_torsion_publ_flag
Co1 O1 C1 C2 -82.6(4) 18_655 . . . ?
Dy1 O1 C1 C2 109.1(4) . . . . ?
Co1 O1 C1 C6 98.7(4) 18_655 . . . ?
Dy1 O1 C1 C6 -69.5(5) . . . . ?
O1 C1 C2 C3 -178.7(4) . . . . ?
C6 C1 C2 C3 0.0 . . . . ?
C1 C2 C3 C4 0.0 . . . . ?
C2 C3 C4 C5 0.0 . . . . ?
C3 C4 C5 C6 0.0 . . . . ?
C4 C5 C6 C1 0.0 . . . . ?
C4 C5 C6 C7 -175.4(4) . . . . ?
O1 C1 C6 C5 178.7(4) . . . . ?
C2 C1 C6 C5 0.0 . . . . ?
O1 C1 C6 C7 -6.3(5) . . . . ?
C2 C1 C6 C7 175.1(4) . . . . ?
C5 C6 C7 C8 47.7(4) . . . . ?
C1 C6 C7 C8 -127.5(3) . . . . ?
C5 C6 C7 C12 -130.1(3) . . . . ?
C1 C6 C7 C12 54.7(4) . . . . ?
C12 C7 C8 C9 0.0 . . . . ?
C6 C7 C8 C9 -177.9(4) . . . . ?
C7 C8 C9 C10 0.0 . . . . ?
C8 C9 C10 C11 0.0 . . . . ?
C9 C10 C11 C12 0.0 . . . . ?
Co1 O2 C12 C11 -67.0(5) . . . . ?
Dy1 O2 C12 C11 101.0(4) . . . . ?
Co1 O2 C12 C7 113.0(4) . . . . ?
Dy1 O2 C12 C7 -79.0(4) . . . . ?
C10 C11 C12 O2 180.0(4) . . . . ?
C10 C11 C12 C7 0.0 . . . . ?
C8 C7 C12 O2 180.0(4) . . . . ?
C6 C7 C12 O2 -2.2(5) . . . . ?
C8 C7 C12 C11 0.0 . . . . ?
C6 C7 C12 C11 177.8(4) . . . . ?
C20 N2 C16 C17 2.6(13) . . . . ?
Co1 N2 C16 C17 -173.0(7) . . . . ?
N2 C16 C17 C18 1.1(16) . . . . ?
C16 C17 C18 C19 -3.3(15) . . . . ?
C17 C18 C19 C20 2.1(11) . . . . ?
C17 C18 C19 C24 -175.0(7) . . . . ?
C16 N2 C20 C19 -3.9(9) . . . . ?
Co1 N2 C20 C19 172.3(3) . . . . ?
C16 N2 C20 C21 174.8(6) . . . . ?
Co1 N2 C20 C21 -9.0(6) . . . . ?
C24 C19 C20 N2 178.7(5) . . . . ?
C18 C19 C20 N2 1.6(7) . . . . ?
C24 C19 C20 C21 0.0 . . . . ?
C18 C19 C20 C21 -177.1(7) . . . . ?
N2 C20 C21 O4 2.2(6) . . . . ?
C19 C20 C21 O4 -179.1(5) . . . . ?
N2 C20 C21 C22 -178.7(5) . . . . ?
C19 C20 C21 C22 0.0 . . . . ?
O4 C21 C22 C23 179.1(5) . . . . ?
C20 C21 C22 C23 0.0 . . . . ?
O4 C21 C22 Cl2 -2.8(5) . . . . ?
C20 C21 C22 Cl2 178.1(4) . . . . ?
C21 C22 C23 C24 0.0 . . . . ?
Cl2 C22 C23 C24 -178.2(4) . . . . ?
C22 C23 C24 C19 0.0 . . . . ?
C22 C23 C24 Cl1 -178.4(4) . . . . ?
C20 C19 C24 C23 0.0 . . . . ?
C18 C19 C24 C23 177.0(7) . . . . ?
C20 C19 C24 Cl1 178.4(4) . . . . ?
C18 C19 C24 Cl1 -4.6(6) . . . . ?
C22 C21 O4 Co1 -173.6(2) . . . . ?
C20 C21 O4 Co1 5.5(4) . . . . ?
C22 C21 O4 Dy1 83.1(5) . . . 24_656 ?
C20 C21 O4 Dy1 -97.8(4) . . . 24_656 ?
C22 C21 O4 Dy1 -74.0(5) . . . . ?
C20 C21 O4 Dy1 105.1(4) . . . . ?
Dy2 Dy2 O5 Dy1 -76.4(6) 13_655 . . . ?
O5 Dy2 O5 Dy1 -156.79(11) 6 . . . ?
O5 Dy2 O5 Dy1 4.0(12) 12_554 . . . ?
O5 Dy2 O5 Dy1 -26.6(3) 18_655 . . . ?
O5 Dy2 O5 Dy1 -76.4(6) 13_655 . . . ?
O5 Dy2 O5 Dy1 -126.3(10) 24_656 . . . ?
Cl3 Dy2 O5 Dy1 103.6(6) . . . . ?
O5 Dy2 O5 Dy2 -80.4(6) 6 . . 13_655 ?
O5 Dy2 O5 Dy2 80.4(6) 12_554 . . 13_655 ?
O5 Dy2 O5 Dy2 49.8(4) 18_655 . . 13_655 ?
O5 Dy2 O5 Dy2 -0.003(0) 13_655 . . 13_655 ?
O5 Dy2 O5 Dy2 -49.8(4) 24_656 . . 13_655 ?
Cl3 Dy2 O5 Dy2 180.0 . . . 13_655 ?
Dy2 Dy2 O5 Dy1 73.2(6) 13_655 . . 24_656 ?
O5 Dy2 O5 Dy1 -7.1(12) 6 . . 24_656 ?
O5 Dy2 O5 Dy1 153.62(14) 12_554 . . 24_656 ?
O5 Dy2 O5 Dy1 123.1(10) 18_655 . . 24_656 ?
O5 Dy2 O5 Dy1 73.2(6) 13_655 . . 24_656 ?
O5 Dy2 O5 Dy1 23.4(3) 24_656 . . 24_656 ?
Cl3 Dy2 O5 Dy1 -106.8(6) . . . 24_656 ?
 
loop_
 _geom_hbond_atom_site_label_D 
 _geom_hbond_atom_site_label_H 
 _geom_hbond_atom_site_label_A 
 _geom_hbond_distance_DH 
 _geom_hbond_distance_HA 
 _geom_hbond_distance_DA 
 _geom_hbond_angle_DHA 
 _geom_hbond_site_symmetry_A 
C13 H13B Cl3  0.98 2.28 3.259(12) 175.6 13_655
C13 H13B Cl3'  0.98 1.63 2.614(18) 177.9 13_655
C13 H13B Cl3'  0.98 2.67 3.639(17) 168.9 18_655
C13 H13B Cl3'  0.98 2.67 3.626(17) 164.9 24_656
C15 H15A Cl4  0.98 2.65 3.559(10) 155.1 .
C16 H16 Cl4  0.95 2.91 3.588(8) 129.7 .
O5' H52 Cl2  0.83 2.31 3.048(12) 148.7 .
O5' H52 Cl3'  0.83 2.55 2.958(15) 111.7 6
O5' H52 Cl3'  0.83 2.54 2.949(15) 111.3 12_554
O7 H71 Cl3'  0.96 2.79 3.39(2) 122.0 23_665
O7 H72 Cl2  0.94 2.77 3.702(19) 171.3 19_656
 
_refine_diff_density_max    1.191
_refine_diff_density_min   -1.402
_refine_diff_density_rms    0.135

_shelx_res_file
;

    106-Pa-3.res created by SHELXL-2014/7


TITL 106-Pa-3 in Pa-3
CELL 0.71073  25.0221  25.0221  25.0221  90.000  90.000  90.000
ZERR  4.00   0.0002   0.0002   0.0002   0.000   0.000   0.000
LATT 1
SYMM 0.5-X, -Y, 0.5+Z
SYMM -X, 0.5+Y, 0.5-Z
SYMM 0.5+X, 0.5-Y, -Z
SYMM Z, X, Y
SYMM 0.5+Z, 0.5-X, -Y
SYMM 0.5-Z, -X, 0.5+Y
SYMM -Z, 0.5+X, 0.5-Y
SYMM Y, Z, X
SYMM -Y, 0.5+Z, 0.5-X
SYMM 0.5+Y, 0.5-Z, -X
SYMM 0.5-Y, -Z, 0.5+X
SFAC C  H  N  O  Cl Co Dy
UNIT 576  480  48  132  60  24  28

omit -3 50.04
ACTA
L.S. 16
BOND $H
CONF
HTAB
EQIV $1 -x+1, -y, -z
HTAB C13 Cl3_$1
HTAB C13 Cl3'_$1
EQIV $2 -z+1/2, x-1/2, y
HTAB C13 Cl3'_$2
EQIV $3 y+1/2, z, -x+1/2
HTAB C13 Cl3'_$3
HTAB C15 Cl4
HTAB C16 Cl4
HTAB O5' Cl2
EQIV $4 z+1/2, -x+1/2, -y
HTAB O5' Cl3'_$4
EQIV $5 -y+1/2, -z, x-1/2
HTAB O5' Cl3'_$5
EQIV $6 -y+1/2, z+1/2, x
HTAB O7 Cl3'_$6
EQIV $7 z+1/2, x, -y+1/2
HTAB O7 Cl2_$7
delu N1 C14 C15
delu O3 C13
FMAP 2
PLAN 20
size 0.26 0.21 0.18
TEMP -120
DFIX 1.39 0.01 C16 C17 C17 C18 C18 C19
DFIX 1.52 0.01 C6 C7
simu N1 C14 C15
isor 0.01 0.02 O5 O5' C14 N1 C15
simu O3 C13
isor 0.01 0.02 O3 C13
WGHT    0.053300   91.845802
FVAR       0.26807   0.33098   0.50000
MOLE 1
CO1   6    0.631815    0.151683    0.101369    11.00000    0.03172    0.03612 =
         0.02984   -0.00285   -0.00207   -0.00366
DY1   7    0.510505    0.110354    0.095979    11.00000    0.02976    0.03158 =
         0.03091   -0.00885    0.00457   -0.00499
DY2   7    0.481245    0.018755   -0.018755    10.16667    0.02930    0.02930 =
         0.02930   -0.00695    0.00695   -0.00695
O1    4    0.461651    0.179406    0.128251    11.00000    0.03389    0.03246 =
         0.03859   -0.00685   -0.00118    0.00034
O2    4    0.567487    0.153565    0.152284    11.00000    0.03501    0.03723 =
         0.03123   -0.00927   -0.00167    0.00302
AFIX  66
C1    1    0.470491    0.232249    0.137807    11.00000    0.03027    0.03390 =
         0.04147   -0.00603    0.00452   -0.00173
C2    1    0.445593    0.269331    0.104778    11.00000    0.04004    0.03816 =
         0.04617   -0.00195   -0.00280    0.00328
AFIX  43
H2    2    0.422581    0.257551    0.076973    11.00000   -1.20000
AFIX  65
C3    1    0.454364    0.323648    0.112433    11.00000    0.05843    0.03808 =
         0.05426    0.00348    0.00101    0.01185
AFIX  43
H3    2    0.437347    0.348992    0.089859    11.00000   -1.20000
AFIX  65
C4    1    0.488034    0.340884    0.153116    11.00000    0.05257    0.03166 =
         0.07066   -0.00538    0.00368   -0.00307
AFIX  43
H4    2    0.494029    0.378008    0.158347    11.00000   -1.20000
AFIX  65
C5    1    0.512933    0.303803    0.186145    11.00000    0.04303    0.03828 =
         0.05718   -0.01255   -0.00015   -0.00180
AFIX  43
H5    2    0.535944    0.315583    0.213950    11.00000   -1.20000
AFIX  65
C6    1    0.504162    0.249486    0.178491    11.00000    0.03191    0.03545 =
         0.03727   -0.00696    0.00213    0.00465
AFIX  66

C7    1    0.529459    0.211262    0.219128    11.00000    0.02361    0.02988 =
         0.04852   -0.01126   -0.00276   -0.00044
C8    1    0.522460    0.223664    0.272822    11.00000    0.03747    0.04623 =
         0.04088   -0.01877   -0.00215    0.00585
AFIX  43
H8    2    0.501778    0.253906    0.282780    11.00000   -1.20000
AFIX  65
C9    1    0.545719    0.191818    0.311946    11.00000    0.03999    0.05892 =
         0.03089   -0.01995   -0.00305    0.00351
AFIX  43
H9    2    0.540935    0.200295    0.348644    11.00000   -1.20000
AFIX  65
C10   1    0.575979    0.147569    0.297377    11.00000    0.03598    0.05127 =
         0.03724   -0.00452   -0.01071    0.00602
AFIX  43
H10   2    0.591876    0.125804    0.324116    11.00000   -1.20000
AFIX  65
C11   1    0.582979    0.135166    0.243683    11.00000    0.03143    0.04167 =
         0.04004   -0.01472   -0.00665    0.00523
AFIX  43
H11   2    0.603660    0.104924    0.233725    11.00000   -1.20000
AFIX  65
C12   1    0.559720    0.167012    0.204558    11.00000    0.03018    0.03547 =
         0.03142   -0.01137   -0.00364   -0.00358
AFIX   0
O3    4    0.597028    0.077543    0.081212    11.00000    0.03498    0.03416 =
         0.03418   -0.00306    0.00934   -0.00274
C13   1    0.625881    0.037834    0.112663    11.00000    0.09930    0.07070 =
         0.08170    0.00514    0.01588    0.00514
AFIX 137
H13A  2    0.664265    0.040889    0.105505    11.00000   -1.50000
H13B  2    0.613586    0.001966    0.102854    11.00000   -1.50000
H13C  2    0.619176    0.043970    0.150759    11.00000   -1.50000
AFIX   0
N1    3    0.688630    0.140264    0.160128    11.00000    0.03710    0.05965 =
         0.03209   -0.00297    0.00022   -0.00056
C14   1    0.717890    0.144869    0.193108    11.00000    0.04166    0.03849 =
         0.04789    0.00591   -0.00377   -0.00381
C15   1    0.755758    0.150415    0.237034    11.00000    0.09413    0.05378 =
         0.09486    0.01594   -0.05336   -0.01115
AFIX 137
H15A  2    0.775801    0.183803    0.232856    11.00000   -1.50000
H15B  2    0.780611    0.120146    0.236745    11.00000   -1.50000
H15C  2    0.736320    0.151023    0.271030    11.00000   -1.50000
AFIX   0
N2    3    0.645971    0.234003    0.093787    11.00000    0.05340    0.03849 =
         0.04057   -0.00053   -0.01289   -0.01446
C16   1    0.683895    0.262652    0.116362    11.00000    0.07720    0.05087 =
         0.05333    0.00123   -0.02104   -0.01909
AFIX  43
H16   2    0.711077    0.244756    0.135917    11.00000   -1.20000
AFIX   0
C17   1    0.685727    0.318092    0.112706    11.00000    0.10537    0.04585 =
         0.07146   -0.00419   -0.03489   -0.02821
AFIX  43
H17   2    0.714015    0.337482    0.128992    11.00000   -1.20000
AFIX   0
C18   1    0.646184    0.344475    0.085288    11.00000    0.11674    0.03541 =
         0.06278   -0.00487   -0.01281   -0.01303
AFIX  43
H18   2    0.645598    0.382411    0.083884    11.00000   -1.20000
AFIX  66
C19   1    0.606577    0.314222    0.059334    11.00000    0.08600    0.04444 =
         0.04313    0.00182    0.00597    0.00299
C20   1    0.608172    0.258892    0.064013    11.00000    0.05358    0.03949 =
         0.03553    0.00125   -0.00256   -0.00312
C21   1    0.571096    0.227645    0.036904    11.00000    0.04080    0.04655 =
         0.02995    0.00284    0.00051    0.00559
C22   1    0.532425    0.251727    0.005116    11.00000    0.04142    0.07058 =
         0.04130    0.00778   -0.00564    0.00258
C23   1    0.530829    0.307058    0.000437    11.00000    0.06405    0.07913 =
         0.05160    0.02297    0.00597    0.02807
AFIX  43
H23   2    0.504400    0.323517   -0.021289    11.00000   -1.20000
AFIX  65
C24   1    0.567905    0.338306    0.027545    11.00000    0.09005    0.04903 =
         0.05384    0.01299    0.00805    0.01376
AFIX   0

CL1   5    0.563694    0.408096    0.022046    11.00000    0.14587    0.05406 =
         0.09291    0.02543   -0.00151    0.02312
CL2   5    0.487390    0.214885   -0.030278    11.00000    0.05129    0.12566 =
         0.05780    0.00757   -0.02410   -0.00307
O4    4    0.572584    0.172469    0.042469    11.00000    0.03477    0.04012 =
         0.03402   -0.00382   -0.00606   -0.00427
PART 1
O5    4    0.520409    0.074429    0.010306    10.50000    0.03340    0.03609 =
         0.03040   -0.00305    0.00010   -0.00808
AFIX   3
H51   2    0.499576    0.094157   -0.010190    10.50000   -1.50000
AFIX   0
PART 2
O5'   4    0.513598    0.100273    0.001553    10.50000    0.03390    0.03407 =
         0.02962   -0.00337   -0.00110   -0.00579
AFIX   3
H52   2    0.497665    0.124678   -0.014433    10.50000   -1.50000
AFIX   0
PART 0
DFIX 2.72 0.01 Dy2 CL3'
isor 0.01 CL3'
EADP CL3 CL3'
PART 1
CL3   5    0.421299    0.078701   -0.078701    20.16667    0.02442    0.02442 =
         0.02442   -0.00492    0.00492   -0.00492
PART 2
CL3'  5    0.408504    0.057751   -0.088297   -20.16667    0.02442    0.02442 =
         0.02442   -0.00492    0.00492   -0.00492
PART 0
CL4   5    0.787047    0.287047    0.212953    10.33333    0.06019    0.06019 =
         0.06019   -0.00293   -0.00293    0.00293
O7    4    0.422588    0.347288    0.290881    10.50000    0.08492    0.11113 =
         0.15527   -0.02458   -0.00147    0.01183
AFIX   3
H71   2    0.401984    0.353693    0.322458    10.50000   -1.50000
H72   2    0.430461    0.383972    0.289425    10.50000   -1.50000
AFIX   0
HKLF 4

REM  106-Pa-3 in Pa-3
REM R1 =  0.0377 for    3962 Fo > 4sig(Fo)  and  0.0475 for all    4622 data
REM    314 parameters refined using     75 restraints

END

WGHT      0.0536     91.4930

REM Instructions for potential hydrogen bonds
HTAB C13 Cl3_$1
HTAB C13 Cl3'_$1
HTAB C13 Cl3'_$2
HTAB C13 Cl3'_$3
HTAB C15 Cl4
HTAB C16 Cl4
HTAB O5' Cl2
HTAB O5' Cl3'_$4
HTAB O5' Cl3'_$5
HTAB O7 Cl3'_$6
HTAB O7 Cl2_$7

REM Highest difference peak  1.191,  deepest hole -1.402,  1-sigma level  0.135
Q1    1   0.4198  0.0551 -0.0789  11.00000  0.05    1.19
Q2    1   0.4755  0.3507  0.3186  11.00000  0.05    1.17
Q3    1   0.4096  0.3096  0.2986  11.00000  0.05    1.12
Q4    1   0.4631  0.0369 -0.0369  10.33333  0.05    1.10
Q5    1   0.3835  0.3805  0.3125  11.00000  0.05    1.10
Q6    1   0.4042  0.0424 -0.0924  11.00000  0.05    1.07
Q7    1   0.4111  0.0889 -0.0889  10.33333  0.05    1.04
Q8    1   0.6971  0.1033  0.1603  11.00000  0.05    0.68
Q9    1   0.4086  0.3956  0.3456  11.00000  0.05    0.64
Q10   1   0.3506  0.3506  0.3506  10.33333  0.05    0.61
Q11   1   0.4308  0.3531  0.2807  11.00000  0.05    0.59
Q12   1   0.4431  0.3229  0.3385  11.00000  0.05    0.58
Q13   1   0.5648  0.2128  0.0392  11.00000  0.05    0.58
Q14   1   0.7989  0.2841  0.1640  11.00000  0.05    0.55
Q15   1   0.8445  0.2926  0.2085  11.00000  0.05    0.51
Q16   1   0.4295  0.3357  0.3333  11.00000  0.05    0.50
Q17   1   0.5306  0.3951  0.0085  11.00000  0.05    0.50
Q18   1   0.5957  0.3973  0.0375  11.00000  0.05    0.49
Q19   1   0.5556  0.3934 -0.0135  11.00000  0.05    0.49
Q20   1   0.6566  0.1395  0.1201  11.00000  0.05    0.49
;
_shelx_res_checksum   76604

_shelx_hkl_file
;
  -1  -2   0 10.5206 4.36656   1
  -2  -1  -1 29236.9 662.340   1
  -1  -2  -1 30305.6 664.292   1
  -1  -1  -2 28483.7 661.693   1
   0  -2  -1 32987.4 744.955   1
   1   2   1 27359.1 239.451   1
   2   1   1 5937.73 213.973   1
  -2  -2  -2 5239.95 131.604   1
  -1  -2  -2 27738.9 645.857   1
  -2  -2  -1 29099.0 646.759   1
   2   2   0 11376.7 268.568   1
  -2  -2   0 11562.2 268.340   1
   2   1   2 26917.5 630.927   1
   1   2   2 28234.5 633.158   1
   2   2   1 28448.1 633.917   1
   2   2   2 4897.72 123.961   1
   0  -3   0 5.17067 4.58244   1
   1  -3   0 4.81152 4.47729   1
   1   3   0 6.12493 6.47676   1
   2   3   0 3883.99 100.720   1
   3   0   2 3771.75 94.7287   1
  -2  -3   0 3853.85 100.829   1
  -2  -3  -1 7514.79 184.558   1
  -1  -3  -1 11.8928 6.82031   1
   0  -3   1 6.71393 4.67952   1
   0   3   1 7.17320 5.72225   1
   0  -3  -1 9.48187 5.04991   1
   3   1   1 55.8276 8.05995   1
   1   3   1 16.9639 7.70423   1
   3   1   2 7585.92 187.543   1
   2   3   1 8133.97 191.912   1
  -2  -3  -2 10476.8 251.922   1
  -3  -2  -1 4296.92 110.837   1
  -1  -3  -2 4241.70 111.223   1
   1   3   2 4284.81 111.512   1
   2   1   3 4258.40 108.313   1
   3   2   1 4367.94 111.740   1
   2   3   2 10553.6 260.303   1
   2   2   3 10923.0 258.313   1
   3   2   2 11064.0 259.767   1
  -2  -3  -3 3406.10 95.0374   1
  -3  -3  -2 3419.88 95.4355   1
  -3  -3  -1 3593.09 98.9324   1
  -1  -3  -3 3642.43 98.0846   1
   3   3   0 35.3907 10.0807   1
   3   0   3 30.4799 6.92021   1
   3   3   1 3621.33 97.5326   1
   3   1   3 3456.65 92.7862   1
   3   2   3 3364.64 94.2385   1
   2   3   3 3448.02 95.7738   1
   3   3   2 3521.68 97.0257   1
   3   3   3 344.747 23.2215   1
   0  -4   0 10429.8 247.886   1
   1  -4   0 3.73162 6.44490   1
  -1  -4   0 0.97013 7.29322   1
  -2  -4   0 3018.20 86.2647   1
   2   4   0 2946.06 85.8038   1
   4   0   2 3144.61 80.5874   1
   4   0   3 33.7075 8.60176   1
   3   4   0 25.3011 11.4423   1
  -3  -4   0 7.52673 10.7886   1
   4  -1   3 4172.83 101.255   1
  -3  -4  -1 4070.03 113.353   1
   3   4  -1 3974.26 111.718   1
  -2  -4  -1 1380.72 49.6779   1
   2  -4   1 1470.17 41.4382   1
  -1  -4  -1 2739.62 77.9456   1
   1  -4   1 2700.39 71.6351   1
   0  -4   1 63.7445 8.99092   1
   0  -4  -1 51.4502 9.48809   1
  -1  -4   1 2674.69 73.9836   1
   1   4   1 2573.42 75.1249   1
   1  -4  -1 2583.66 72.7980   1
   4   1   2 1439.51 45.8835   1
   2   4   1 1381.40 49.2015   1
   4   1   3 4413.91 112.067   1
   3   4   1 4057.81 115.806   1
  -3  -4  -2 9642.28 238.906   1
  -2  -4  -2 58.0148 12.7075   1
  -1  -4  -2 5310.90 138.008   1
   1  -4   2 5301.56 128.316   1
   0  -4  -2 1569.78 51.4399   1
   4   2   1 5258.20 135.348   1
   1   4   2 5199.07 135.993   1
   2   4   2 53.2499 13.0570   1
   4   2   2 53.4091 11.8071   1
   3   4   2 9400.98 234.850   1
   4   2   3 9453.40 231.420   1
  -3  -4  -3 8365.63 211.523   1
  -2  -4  -3 13126.2 316.893   1
  -1  -4  -3 1227.95 45.7973   1
  -4  -3  -1 1215.25 45.6704   1
   4   3   0 79.5380 13.9096   1
   3   1   4 1229.32 42.1595   1
   4   3   1 1340.38 48.1084   1
   2   4   3 12914.1 315.846   1
   4   3   2 13183.4 316.148   1
   3   2   4 13238.0 312.827   1
   4   3   3 8415.95 214.690   1
   3   4   3 8735.08 216.839   1
   3   3   4 8470.34 213.686   1
  -4  -4  -2 3481.83 101.857   1
  -2  -4  -4 3501.85 101.334   1
  -4  -4  -1 19131.8 457.357   1
  -1  -4  -4 19844.9 457.339   1
   4  -1   4 19298.4 442.883   1
   4   4   0 13284.9 319.122   1
   4   0   4 13111.3 308.285   1
   4   1   4 19055.3 438.812   1
   4   4   1 19838.6 447.590   1
  -4   1  -4 18341.7 430.379   1
   4   4   2 3447.99 104.344   1
   2   4   4 3416.70 103.048   1
   3   4   4 3885.15 113.290   1
   4   3   4 4011.00 112.965   1
   4   4   3 3903.56 114.900   1
   4   4   4 72522.4 1648.19   1
   0  -5   0 4.30511 8.52921   1
   1  -5   0 18.5643 9.52855   1
  -1  -5   0 13.0198 9.50227   1
   2  -5   0 1889.34 56.5493   1
   5   0   2 1899.40 56.6651   1
  -2  -5   0 1878.53 62.5317   1
   5   0   3 7.29723 8.42358   1
   3   5   0 1.45952 11.4387   1
   5   0   4 260.353 17.4338   1
  -4  -5   0 227.576 21.8756   1
   4   5   0 253.594 23.3090   1
  -5   0  -4 250.216 16.9818   1
   4   5  -1 3067.37 92.8031   1
   5  -1   4 2900.64 78.6782   1
  -4  -5  -1 2984.94 92.0496   1
   3  -5   1 3542.23 88.8838   1
  -3  -5  -1 3416.41 100.955   1
   5  -1   3 3314.12 88.3215   1
   2  -5   1 834.149 30.2615   1
  -2  -5  -1 837.937 37.8772   1
  -1  -5  -1 10207.2 246.070   1
   1  -5   1 9889.33 239.308   1
   0  -5   1 8.81861 9.15071   1
   0  -5  -1 19.9412 11.4354   1
  -1  -5   1 10173.6 247.828   1
   1  -5  -1 10317.0 247.566   1
   2   5   1 846.642 38.4663   1
   5   1   2 888.876 35.3632   1
  -2  -5   1 899.324 37.3575   1
   3   5   1 2791.54 92.4339   1
   5   1   3 3389.42 89.5575   1
   5   1   4 2957.50 86.6882   1
   4   5   1 3127.88 94.9536   1
  -5   1  -4 3004.48 79.0478   1
  -4  -5  -2 693.008 37.1182   1
   5  -2   4 654.428 23.2186   1
   3  -5   2 1555.99 45.1919   1
   5  -2   3 1592.75 44.8771   1
  -2  -5  -2 3595.78 102.952   1
   2  -5   2 3482.09 89.7091   1
   1  -5   2 7577.14 181.941   1
  -1  -5  -2 7471.59 191.695   1
   0  -5  -2 12.5870 10.8706   1
   0  -5   2 4.61351 8.88174   1
   1   5   2 7334.90 193.069   1
   5   2   1 7995.11 193.406   1
   5   2   2 3527.29 90.0069   1
   2   5   2 3344.98 92.5355   1
   3   5   2 1863.10 63.6948   1
   5   2   3 1511.58 56.1874   1
   5   2   4 696.661 34.6299   1
   4   5   2 690.022 37.8763   1
  -4  -5  -3 10572.7 266.769   1
  -3  -5  -3 16436.7 396.393   1
  -2  -5  -3 99.4874 15.9220   1
  -1  -5  -3 65.2902 14.3302   1
   0  -5  -3 17.8527 12.4140   1
   5   3   1 74.7962 14.7037   1
   1   5   3 59.1929 14.7023   1
  -1   5  -3 56.1789 9.01239   1
   2   5   3 112.847 16.9334   1
   5   3   2 129.549 17.6085   1
   5   3   3 17094.3 393.393   1
   3   3   5 16387.4 390.347   1
   4   5   3 10537.8 263.711   1
   3   4   5 10060.7 259.182   1
   5   3   4 10480.6 260.168   1
  -3  -5  -4 1787.84 66.1840   1
  -2  -5  -4 8356.74 215.320   1
  -5  -4  -1 3555.44 105.674   1
  -1  -5  -4 3646.63 106.377   1
   5   4   0 8.05359 12.6178   1
  -4   0  -5 38.4127 9.60669   1
   4   1   5 3745.95 102.513   1
  -4   1  -5 3795.35 96.1701   1
   5   4   1 3706.76 110.190   1
   2   5   4 8505.19 215.393   1
   5   4   2 8541.89 216.724   1
  -4   2  -5 8353.42 195.653   1
   4   2   5 8201.59 209.467   1
   4   3   5 1667.84 62.2676   1
   3   5   4 1782.84 65.8588   1
   5   4   3 1875.01 67.0606   1
   5   4   4 35.2503 18.5356   1
   4   4   5 17.5983 15.0507   1
   4   5   4 47.8220 21.0417   1
  -2  -5  -5 7350.22 189.690   1
  -5  -5  -2 7175.06 190.337   1
   5  -2   5 7043.25 168.659   1
  -5  -1  -5 1892.50 60.9169   1
   5  -1   5 1876.36 54.8098   1
  -5  -5  -1 1842.87 68.2824   1
  -1  -5  -5 1897.63 67.3157   1
   5   5  -1 1840.66 68.2484   1
   5   5   0 19.6828 15.2082   1
  -5   0  -5-1.99542 9.48332   1
   5   0   5 31.5536 10.7118   1
   5   1   5 1972.38 62.4181   1
   5   5   1 1784.57 68.2229   1
  -5   1  -5 1895.42 55.0855   1
   5   5   2 7327.40 197.345   1
   5   2   5 7253.88 190.361   1
  -5   2  -5 7501.96 175.224   1
   5   5   3 37605.1 887.412   1
   3   5   5 38470.9 885.956   1
   5   3   5 38514.4 883.256   1
   5   5   4 1938.23 73.3089   1
   4   5   5 1797.53 70.4676   1
   5   4   5 1877.63 70.9350   1
   5   5   5 74366.8 1696.59   1
   0  -6   0 2041.50 65.9221   1
   1  -6   0 9.58152 10.6124   1
  -1  -6   0 5.58878 11.6792   1
   2  -6   0 112.326 13.7540   1
  -2  -6   0 110.815 17.0347   1
  -3  -6   0 9.93132 13.8377   1
   6   0   3 15.1682 10.0717   1
   6   0   4 7778.40 195.013   1
   4   6   0 7670.35 205.524   1
  -4  -6   0 7824.52 205.896   1
  -6   0  -4 8050.47 193.651   1
   6   0   5 62.9416 12.8180   1
   5   6   0 47.7225 17.9785   1
  -6  -1  -5 23.4224 11.3025   1
   6  -1   5 5.75815 8.72139   1
  -5  -6  -1 23.9314 14.9974   1
   5   6  -1 43.1699 15.7476   1
  -6  -1  -4 551.789 29.0422   1
   6  -1   4 625.996 26.7250   1
  -4  -6  -1 644.495 35.2137   1
   3  -6   1 1933.89 56.1111   1
   6  -1   3 1823.67 55.7032   1
  -3  -6  -1 1720.13 65.4273   1
   2  -6   1 1212.59 42.1892   1
  -2  -6  -1 1199.86 49.1641   1
   1  -6   1 20987.9 479.607   1
  -1  -6  -1 20151.9 485.837   1
   0  -6   1 9466.88 235.673   1
   0  -6  -1 9868.41 239.980   1
   1  -6  -1 20585.1 484.777   1
  -1  -6   1 20855.9 485.846   1
   2  -6  -1 1136.62 43.4701   1
  -2   6  -1 1079.06 38.8681   1
   6   1   2 1183.96 44.4035   1
  -2  -6   1 1151.16 45.9252   1
   6   1   3 1809.85 59.6518   1
   3   6   1 1755.65 65.4675   1
  -3  -6   1 1781.97 63.6557   1
   6   1   4 616.722 31.2564   1
   4   6   1 552.597 34.4514   1
   5   6   1 16.2393 15.5772   1
   6   1   5 11.2984 11.6070   1
  -6   1  -5 12.2655 9.08951   1
  -5  -6  -2 6009.03 170.262   1
   6  -2   5 6204.84 150.021   1
  -6  -2  -5 6127.79 162.515   1
   4  -6   2 7400.07 173.894   1
   6  -2   4 7209.83 173.357   1
  -3  -6  -2 14465.0 356.380   1
   3  -6   2 14650.6 339.667   1
   2  -6   2 6541.32 163.133   1
  -2  -6  -2 6734.23 176.567   1
  -1  -6  -2 2472.40 79.5119   1
   1  -6   2 2396.87 70.1735   1
   0  -6   2 10753.8 261.208   1
   0  -6  -2 10897.4 267.452   1
  -1   6  -2 2178.60 65.6657   1
   1  -6  -2 2293.28 72.7362   1
  -1  -6   2 2264.38 70.5343   1
  -2   6  -2 6570.98 159.966   1
   2   6   2 6391.40 174.035   1
   6   2   2 6587.02 170.502   1
   6   2   3 14640.5 350.729   1
   3   6   2 14415.6 356.492   1
   6   2   4 7072.25 183.879   1
   4   6   2 6958.71 190.186   1
   6   2   5 6118.66 166.408   1
   5   6   2 6343.05 175.149   1
   5  -6   3 296.219 14.0262   1
   6  -3   5 270.338 13.1812   1
  -5  -6  -3 315.804 29.1066   1
   4  -6   3 24210.5 547.753   1
   6  -3   4 24113.7 546.699   1
  -4  -6  -3 23691.7 572.838   1
   3  -6   3 2668.70 70.1010   1
  -3  -6  -3 2578.59 87.1614   1
   2  -6   3 2626.60 71.6133   1
  -2  -6  -3 2614.25 85.8042   1
  -1  -6  -3 1588.57 59.5722   1
   0   6  -3 17439.0 409.701   1
   0  -6  -3 17622.7 418.855   1
   6   3   1 1471.59 57.0191   1
  -1   6  -3 1572.11 48.9719   1
   1   6   3 1511.47 57.9899   1
   2   6   3 2550.98 84.3068   1
  -2   6  -3 2583.65 70.4281   1
   6   3   2 2598.74 83.6872   1
   3   6   3 2968.30 92.1860   1
   6   3   3 2520.40 85.8465   1
   6   3   4 23553.5 564.920   1
   4   6   3 24386.2 571.365   1
   5   6   3 300.474 29.2828   1
   6   3   5 235.146 25.4009   1
  -4  -6  -4 68838.5 1573.44   1
  -3  -6  -4 861.700 44.9924   1
  -2  -6  -4 7509.79 199.620   1
  -4  -1  -6 5926.02 155.406   1
  -1  -6  -4 6210.76 165.252   1
   0  -6  -4 601.251 33.8242   1
   0   6  -4 589.170 27.5218   1
  -4   0  -6 546.384 26.3321   1
   6   4   0 620.262 36.0452   1
  -4   1  -6 6139.57 150.576   1
  -1   6  -4 6040.30 151.064   1
   6   4   1 6041.07 165.524   1
  -4   2  -6 7429.13 134.090   1
   2   6   4 7303.28 159.611   1
   6   4   2 7361.15 160.083   1
  -4   3  -6 733.584 23.4033   1
   3   6   4 683.875 39.7232   1
   4   3   6 718.542 38.0278   1
   6   4   3 682.003 39.3302   1
   4   4   6 70749.1 1653.86   1
   6   4   4 73709.0 1657.22   1
   4   6   4 73848.2 1660.04   1
   6   4   5 3868.46 119.919   1
   5   6   4 4005.56 123.382   1
   4   5   6 3736.38 118.688   1
  -3  -6  -5 5735.75 162.967   1
  -5  -2  -6 825.727 39.4964   1
  -2  -6  -5 883.744 44.2963   1
  -5  -1  -6 6304.43 161.534   1
  -1  -6  -5 6118.50 169.684   1
  -5   0  -6 24918.8 573.510   1
   6   5   0 24657.9 588.782   1
   5   1   6 5888.20 170.170   1
   6   5   1 6135.38 180.739   1
   5   2   6 741.212 34.6668   1
   6   5   2 800.787 40.2454   1
  -5   2  -6 803.268 23.7024   1
   6   5   3 5858.35 169.139   1
   5   3   6 5799.11 162.881   1
   3   6   5 5849.01 167.810   1
  -5   3  -6 6146.00 142.330   1
   6   5   4 3335.11 110.302   1
   4   6   5 3364.88 109.692   1
   5   4   6 3437.44 107.786   1
   5   6   5 4007.19 125.035   1
   6   5   5 3863.97 122.738   1
   5   5   6 3765.31 120.720   1
  -6  -3  -6 15632.9 381.096   1
  -2  -6  -6 5871.31 163.302   1
  -6  -6  -2 5610.29 163.529   1
  -6  -2  -6 5756.42 155.884   1
  -1  -6  -6 1466.59 60.7503   1
  -6  -6  -1 1544.00 63.7537   1
   6  -1   6 1461.36 48.3649   1
   6   6  -1 1547.11 63.2265   1
  -6  -1  -6 1465.96 53.8323   1
   6   0   6 3826.63 108.079   1
   6   6   0 3733.34 121.236   1
   6   1   6 1337.97 52.1188   1
   6   6   1 1440.72 62.8498   1
  -6   1  -6 1499.74 47.5765   1
   6   6   2 5540.27 165.401   1
  -6   2  -6 5914.91 141.972   1
   6   2   6 5652.28 156.813   1
   6   6   3 16202.2 398.277   1
  -6   3  -6 15956.5 364.760   1
   6   3   6 15783.8 389.019   1
   6   4   6 30413.3 722.143   1
   4   6   6 29524.7 723.904   1
   6   6   5 8306.27 227.238   1
   6   5   6 8278.31 224.704   1
   5   6   6 8259.53 225.490   1
   6   6   6 8742.65 237.706   1
   0  -7   0 44.1795 14.5073   1
   1  -7   0 28.5519 13.0300   1
  -1  -7   0 12.8951 13.0966   1
   2  -7   0 30750.5 708.527   1
  -2  -7   0 30653.7 715.557   1
   7   0   3 5.08939 9.56580   1
  -3  -7   0 7.41363 11.8416   1
   3  -7   0 4.92252 10.8489   1
   7   0   4 8456.57 208.513   1
  -4  -7   0 8135.46 219.723   1
   5   7   0 13.0826 14.8433   1
   7   0   5 17.4029 11.4442   1
  -7   0  -5 12.0958 10.0604   1
  -5  -7   0 34.4266 15.1356   1
   6   7   0 349.550 30.9264   1
   7   0   6 320.702 22.9874   1
  -7   0  -6 357.306 22.8005   1
   6   7  -1 4097.12 127.681   1
  -1  -6  -7 3978.82 125.332   1
  -7  -1  -6 4117.89 115.370   1
   7  -1   6 4018.11 110.156   1
  -6  -7  -1 4204.71 128.231   1
  -5  -7  -1 24.1564 16.5148   1
  -7  -1  -5 19.8443 12.3121   1
   7  -1   5 17.9063 10.6419   1
   7  -1   4 98.5447 13.1019   1
   4  -7   1 83.3410 11.9229   1
  -7  -1  -4 69.7680 13.2110   1
   7  -1   3 2251.71 68.2478   1
   3  -7   1 2317.50 68.8473   1
  -3  -7  -1 2230.52 79.8867   1
  -2  -7  -1 959.384 44.9820   1
   2  -7   1 910.895 37.8646   1
   1  -7   1 8648.79 215.717   1
  -1  -7  -1 8638.11 222.538   1
   0  -7   1 12.6688 12.1619   1
   0  -7  -1 24.4096 13.5305   1
  -1  -7   1 8555.50 215.069   1
   1  -7  -1 8767.12 215.093   1
  -1   7  -1 8048.69 208.464   1
  -2  -7   1 914.201 43.8756   1
  -2   7  -1 946.826 37.7009   1
   7   1   2 983.969 42.2872   1
   2  -7  -1 1026.84 42.1892   1
  -3  -7   1 2310.78 78.0397   1
   7   1   3 2235.29 73.3689   1
   4   7   1 96.6838 19.7780   1
   7   1   4 62.6954 15.1141   1
   7   1   5 37.4323 13.2060   1
   5   7   1 33.6830 16.7826   1
   6   7   1 4202.13 128.803   1
   7   1   6 3932.95 116.617   1
  -7   1  -6 4067.91 108.347   1
  -7  -2  -6 754.296 39.2838   1
   7  -2   6 833.603 31.9950   1
  -6  -7  -2 882.502 48.7451   1
  -5  -7  -2 31030.6 739.860   1
   5  -7   2 31710.4 716.290   1
  -7  -2  -5 31618.4 729.413   1
   7  -2   5 31106.7 716.356   1
  -4  -7  -2 6509.63 186.177   1
   7  -2   4 6884.48 167.568   1
   4  -7   2 6809.77 167.773   1
  -7  -2  -4 6849.87 178.850   1
  -3  -7  -2 24331.8 571.668   1
   3  -7   2 23817.0 552.862   1
   2  -7   2 30502.6 692.840   1
  -2  -7  -2 29612.5 706.771   1
   1  -7   2 1483.23 51.1116   1
  -1  -7  -2 1436.70 57.5264   1
   0  -7   2-2.66154 11.7903   1
   0   7  -2-7.89699 12.5048   1
   1  -7  -2 1458.80 56.1127   1
  -1  -7   2 1511.88 55.1853   1
  -1   7  -2 1412.06 50.0770   1
   2  -7  -2 30335.3 696.659   1
   7   2   2 29639.6 697.720   1
  -2   7  -2 29921.0 686.489   1
   7   2   3 25099.1 583.945   1
   3   7   2 24524.2 590.353   1
   4   7   2 7243.67 194.448   1
   7   2   4 6896.60 186.143   1
   5   7   2 31484.5 728.871   1
   7   2   5 30210.8 717.171   1
   7   2   6 748.272 41.1272   1
   6   7   2 902.367 49.4524   1
  -6  -7  -3 2266.83 86.5539   1
   6  -7   3 2397.51 64.0835   1
  -7  -3  -6 2376.08 81.5569   1
   7  -3   6 2254.83 62.5464   1
   7  -3   5 25882.2 586.718   1
  -5  -7  -3 24928.1 613.890   1
  -7  -3  -5 24918.1 606.616   1
   5  -7   3 26237.9 587.680   1
  -4  -7  -3 10230.2 273.443   1
   4  -7   3 10666.4 250.550   1
   7  -3   4 10675.6 249.358   1
  -3  -7  -3 1232.80 56.2174   1
   3  -7   3 1204.11 40.8166   1
  -2  -7  -3 3621.33 113.530   1
   2  -7   3 3693.35 98.5945   1
   1   7  -3 12621.3 308.521   1
  -1  -7  -3 12793.1 316.799   1
   1  -7   3 12732.5 303.578   1
   0   7  -3-1.25174 10.5219   1
   0  -7  -3 25.0581 15.2931   1
   1  -7  -3 13519.5 324.016   1
   7   3   1 13276.7 325.013   1
  -1   7  -3 12839.3 312.691   1
  -2   7  -3 3544.52 94.7108   1
   7   3   2 3525.25 107.581   1
   2   7   3 3444.97 109.244   1
  -3   7  -3 1194.66 38.6709   1
   3   7   3 1151.44 54.2743   1
   7   3   3 1188.81 51.7983   1
   4   7   3 10175.2 270.210   1
   7   3   4 10564.2 266.031   1
   5   7   3 24463.2 601.266   1
   7   3   5 25595.3 595.669   1
   7   3   6 2205.58 80.7765   1
   6   7   3 2293.59 87.5788   1
  -7  -4  -6 1898.06 73.1659   1
   6  -7   4 1958.11 52.0361   1
  -5  -7  -4 21901.5 544.088   1
   5  -7   4 22639.7 511.277   1
   4  -7   4 42.6044 7.86490   1
  -4  -7  -4 29.9260 16.8419   1
  -3  -7  -4 13359.2 336.355   1
  -4  -2  -7 2505.28 79.4444   1
  -2  -7  -4 2565.84 88.3771   1
   2   7  -4 2423.51 80.1063   1
  -4  -1  -7 211.591 19.2573   1
   1   7  -4 238.398 20.8314   1
  -1  -7  -4 220.764 22.6999   1
   7   4   0-1.97219 14.5141   1
   0   7  -4 9.76638 10.7072   1
  -4   0  -7 2.26907 9.15758   1
   0  -7  -4-1.90480 14.9996   1
  -1   7  -4 210.267 16.6791   1
  -4   1  -7 244.677 16.8109   1
   1  -7  -4 185.040 21.1476   1
   7   4   1 268.523 26.4937   1
   7   4   2 2460.33 86.1399   1
  -2   7  -4 2567.54 71.2547   1
   2   7   4 2438.79 86.4481   1
   7   4   3 13403.3 329.282   1
   3   7   4 12811.1 329.468   1
   7   4   4 44.9657 19.0037   1
   4   7   4 57.9669 22.0581   1
   5   7   4 22177.7 533.160   1
   7   4   5 21670.8 528.073   1
   7   4   6 1891.87 74.6093   1
   6   7   4 1802.96 77.1228   1
  -4  -7  -5 3547.69 116.130   1
  -3  -7  -5 3934.74 128.528   1
  -5  -3  -7 4476.51 126.189   1
  -5  -2  -7 3411.49 100.307   1
  -2  -7  -5 3140.37 105.957   1
  -5  -1  -7 9362.61 233.222   1
  -1  -7  -5 9323.69 244.549   1
   7   5   0 19.4379 15.6654   1
   0   7  -5 14.8101 10.4923   1
   0  -7  -5 16.2272 14.9308   1
  -5   0  -7 8.51873 11.2607   1
  -5   1  -7 9238.89 224.387   1
  -1   7  -5 9359.99 225.350   1
   7   5   1 9117.18 243.143   1
   7   5   2 2999.01 102.377   1
  -2   7  -5 3162.29 83.8010   1
  -5   2  -7 3033.21 82.4553   1
  -5   3  -7 4170.06 104.349   1
   3   7   5 4220.61 130.285   1
   7   5   3 4351.33 131.657   1
   4   7   5 3398.91 112.820   1
   7   5   4 3477.57 113.361   1
   5   4   7 3317.27 108.190   1
   5   5   7 4375.53 136.907   1
   7   5   5 4767.55 142.276   1
   5   7   5 4453.58 140.893   1
   7   5   6 1955.80 79.1933   1
   6   7   5 2048.29 83.8919   1
   5   6   7 1888.61 78.4393   1
  -6  -4  -7 2977.64 98.9205   1
  -6  -3  -7 8781.08 228.179   1
  -3  -7  -6 8714.34 235.756   1
  -2  -7  -6 3428.09 113.178   1
  -6  -2  -7 3579.22 106.433   1
  -1  -7  -6 3613.93 118.002   1
   7   6  -1 3856.82 121.710   1
  -6  -1  -7 3866.43 109.451   1
  -6   0  -7 14.1600 9.81224   1
   0  -7  -6 13.0977 15.5934   1
   7   6   0-9.34649 16.0362   1
   6   1   7 3539.75 106.519   1
  -6   1  -7 3845.58 100.965   1
   7   6   1 3586.91 118.128   1
  -2   7  -6 3661.89 96.0234   1
   7   6   2 3356.05 116.308   1
  -6   2  -7 3669.99 95.6177   1
   6   2   7 3624.53 108.969   1
   6   3   7 8716.76 227.565   1
  -6   3  -7 8664.28 205.029   1
   7   6   3 8855.92 236.843   1
   6   4   7 2930.35 98.6534   1
   4   7   6 2926.48 102.066   1
   7   6   4 2808.79 102.513   1
   5   7   6 546.999 41.0136   1
   6   5   7 513.772 37.5475   1
   7   6   5 489.159 40.1691   1
   7   6   6 806.279 49.6804   1
   6   6   7 805.621 48.1494   1
   6   7   6 848.624 51.2601   1
  -7  -5  -7 750.907 45.2092   1
   7  -7   4 2426.81 62.5392   1
  -7  -4  -7 2327.34 85.7887   1
  -7  -3  -7 4.02422 16.1427   1
   7   7  -2 8533.10 232.705   1
  -2  -7  -7 8507.31 230.830   1
  -7  -7  -2 8255.18 231.286   1
  -7  -2  -7 8745.48 221.972   1
  -7  -1  -7 6.28530 12.6096   1
  -1  -7  -7 2.34325 14.3859   1
   7  -1   7 14.1652 10.4098   1
   7   0   7 7.07208 11.0685   1
   7   7   0 2.51702 16.9838   1
  -7   0  -7 12.1906 12.2979   1
   7   7   1 15.3633 18.8443   1
   7   1   7-9.88325 14.2993   1
  -7   1  -7 12.4903 9.49137   1
   7   7   2 8883.64 236.353   1
   7   2   7 8231.32 222.026   1
  -7   2  -7 8604.02 206.974   1
  -7   3  -7 18.7042 7.65864   1
   7   3   7-4.18162 16.7787   1
   7   4   7 2455.41 87.5393   1
   7   7   4 2240.31 91.0705   1
   5   7   7 717.222 46.3291   1
   7   5   7 755.562 46.2978   1
   7   7   5 733.512 49.0752   1
   6   7   7 535.543 42.1020   1
   7   6   7 643.378 45.5075   1
   7   7   6 654.504 46.8984   1
   7   7   7 11156.6 299.931   1
   0  -8   0 71958.7 1635.82   1
  -1   8   0 30.1013 16.2365   1
   1  -8   0 37.7532 17.1593   1
  -1  -8   0 25.5926 16.7672   1
  -2  -8   0 15692.8 388.446   1
   2  -8   0 16051.1 382.166   1
  -3  -8   0 16.5369 17.6658   1
   3  -8   0 15.9014 12.4896   1
   8   0   3 21.9430 13.2867   1
   4  -8   0 481.421 28.4625   1
  -4  -8   0 456.957 34.6304   1
   8   0   4 468.599 28.5069   1
   8   0   5-3.00873 12.9220   1
  -5  -8   0 7.05301 18.0383   1
   6   8   0 729.096 46.3297   1
  -8   0  -6 783.151 36.7723   1
  -8   0  -7 2.88044 12.7669   1
   8   0   7 25.0616 14.4946   1
  -7  -8  -1 5020.88 153.032   1
   7   8  -1 4858.71 151.610   1
   8  -1   7 4858.15 132.093   1
  -1  -7  -8 4773.19 148.240   1
  -8  -1  -7 5045.96 137.970   1
  -6  -8  -1 9017.06 244.791   1
   8  -1   6 8990.27 224.878   1
  -8  -1  -6 9119.71 229.640   1
  -5  -8  -1 36.0402 18.3287   1
  -8  -1  -5 36.9648 14.2030   1
   8  -1   5 55.6311 12.4763   1
   5  -8   1 22.1287 9.95453   1
   8  -1   4 8141.85 200.374   1
  -4  -8  -1 7562.19 214.009   1
   4  -8   1 8015.11 199.722   1
  -3  -8  -1 11682.2 305.041   1
   3  -8   1 12322.5 293.328   1
  -2  -8  -1 10456.3 264.779   1
   2  -8   1 10171.9 254.751   1
   1  -8   1 4545.56 127.492   1
  -1  -8  -1 4623.28 134.308   1
   0  -8  -1 7806.55 204.984   1
   0   8  -1 7420.17 200.139   1
   0  -8   1 8073.03 201.684   1
  -1   8  -1 4631.41 126.885   1
   1  -8  -1 4718.19 132.195   1
  -1  -8   1 4491.23 130.977   1
  -2   8  -1 10248.5 256.527   1
  -2  -8   1 10596.3 266.767   1
   2  -8  -1 10707.6 263.177   1
   8   1   3 12372.9 301.075   1
   3  -8  -1 11889.9 299.510   1
  -3  -8   1 12348.8 307.503   1
  -4  -8   1 8204.58 216.354   1
   8   1   4 7871.05 207.105   1
   8   1   5 30.9426 15.4763   1
   5   8   1 41.7721 19.9674   1
   8   1   6 8924.05 230.421   1
   6   8   1 8984.29 243.658   1
   7   8   1 4842.59 153.796   1
  -8   1  -7 4933.88 130.994   1
   8   1   7 4969.20 140.521   1
  -7  -8  -2 47016.4 1127.07   1
  -8  -2  -7 49643.3 1114.11   1
   8  -2   7 48258.2 1098.64   1
  -6  -8  -2 924.875 50.7669   1
   8  -2   6 880.886 36.4447   1
  -8  -2  -6 944.849 45.4305   1
  -8  -2  -5 330.263 27.4317   1
   5  -8   2 337.671 21.0060   1
  -5  -8  -2 353.699 32.3951   1
   8  -2   5 362.976 21.7161   1
  -4  -8  -2 34.8503 16.6034   1
   8  -2   4 21.7882 10.4528   1
   4  -8   2 20.7016 9.68038   1
  -3  -8  -2 22659.0 543.455   1
   3  -8   2 22556.0 525.849   1
  -2  -8  -2 3234.83 106.226   1
   2  -8   2 3275.16 94.3513   1
  -1  -8  -2 668.049 38.7162   1
   1   8  -2 609.388 35.1347   1
   1  -8   2 618.901 32.3279   1
   0  -8   2 6432.43 166.484   1
   0   8  -2 6001.85 164.908   1
   0  -8  -2 6363.01 172.200   1
   1  -8  -2 664.214 37.1877   1
  -1  -8   2 635.844 35.6356   1
  -1   8  -2 613.037 32.0928   1
   8   2   2 3216.15 101.459   1
  -2  -8   2 3386.76 102.711   1
  -2   8  -2 3205.43 92.4067   1
   2  -8  -2 3197.05 99.7141   1
   8   2   3 22163.4 526.831   1
   8   2   4 27.9965 16.4641   1
   4   8   2 26.3618 17.7745   1
   5   8   2 373.823 33.7386   1
   8   2   5 408.535 31.0626   1
   6   8   2 1041.01 56.2314   1
   8   2   6 921.339 47.4392   1
  -8   2  -7 49127.2 1093.19   1
   7   8   2 47480.4 1125.79   1
   8   2   7 46879.0 1110.84   1
  -8  -3  -7 1951.01 73.8633   1
  -7  -8  -3 1983.75 81.0694   1
   8  -3   7 1843.87 55.5395   1
   8  -3   6 6795.38 164.678   1
  -8  -3  -6 6927.54 184.471   1
   6  -8   3 6651.01 165.019   1
  -6  -8  -3 6263.25 190.688   1
   5  -8   3 355.954 20.1780   1
  -5  -8  -3 291.347 31.1774   1
  -8  -3  -5 362.298 29.3550   1
   8  -3   5 360.790 19.5788   1
  -4  -8  -3 34737.2 859.795   1
  -8  -3  -4 36390.1 851.918   1
   4  -8   3 37381.3 835.996   1
   8  -3   4 36903.0 834.402   1
  -3  -8  -3 558.245 37.9652   1
   3  -8   3 568.492 27.2801   1
  -2  -8  -3 1054.96 51.9633   1
   2   8  -3 992.857 46.8205   1
   2  -8   3 1094.89 41.3913   1
  -1  -8  -3 3847.95 116.728   1
   1  -8   3 3720.79 104.846   1
   1   8  -3 3554.95 108.463   1
   0   8  -3 116.630 16.3439   1
   0  -8   3 108.474 16.3354   1
   0  -8  -3 135.302 21.4806   1
  -1   8  -3 3700.48 103.787   1
   8   3   1 3554.08 112.446   1
   1  -8  -3 3676.29 112.937   1
   2  -8  -3 1032.78 48.9684   1
   8   3   2 1126.12 51.4961   1
  -2   8  -3 1001.21 39.5098   1
  -3   8  -3 545.701 25.9123   1
   8   3   3 573.273 36.9427   1
   3   8   3 643.153 40.5846   1
   4   8   3 36004.9 846.239   1
   8   3   4 35903.7 839.281   1
   5   8   3 468.185 38.3734   1
   8   3   5 407.437 33.1703   1
   6   8   3 6485.44 187.777   1
   8   3   6 6207.10 178.005   1
   8   3   7 1816.12 73.8284   1
   7   8   3 1931.10 82.4797   1
  -8  -4  -7 195.036 26.0399   1
   7  -8   4 255.879 14.4727   1
   6  -8   4 1648.73 47.4424   1
   8  -4   6 1565.52 45.7334   1
  -8  -4  -6 1675.44 68.1186   1
  -6  -8  -4 1569.14 71.1087   1
   5  -8   4 173.512 12.5421   1
   8  -4   5 156.163 11.9935   1
  -5  -8  -4 142.789 24.6095   1
  -8  -4  -5 163.749 23.2691   1
  -4  -8  -4 5166.35 157.117   1
   4  -8   4 5275.98 132.128   1
   3   8  -4 4707.93 140.586   1
   3  -8   4 5044.40 126.387   1
  -3  -8  -4 4700.17 146.790   1
  -4  -3  -8 4933.29 140.187   1
  -2  -8  -4 5858.45 171.356   1
   2   8  -4 5938.21 163.715   1
  -4  -2  -8 6129.63 162.039   1
   1   8  -4 55.0224 15.0036   1
  -1  -8  -4 66.7176 19.5568   1
  -4  -1  -8 71.2455 15.2539   1
   0   8  -4 5409.58 143.011   1
   0  -8  -4 5288.22 153.457   1
  -4   0  -8 5290.78 140.518   1
  -1   8  -4 86.5145 13.8400   1
   1  -8  -4 82.0712 18.3772   1
   8   4   1 106.839 21.4298   1
   2   8   4 5635.88 165.839   1
  -2   8  -4 5901.43 149.201   1
   8   4   2 5869.32 166.348   1
  -3   8  -4 4951.20 125.796   1
   8   4   3 5037.22 147.195   1
   3   8   4 4790.18 147.502   1
   4   8   4 5229.30 156.505   1
   8   4   4 5155.92 153.732   1
   8   4   5 160.571 24.2899   1
   5   8   4 153.160 26.6335   1
   8   4   6 1972.74 76.6786   1
   6   8   4 1652.80 77.1016   1
   7   8   4 270.157 32.4360   1
   8   4   7 300.463 30.5959   1
  -8  -5  -7 4795.98 147.144   1
  -8  -5  -6 242.929 29.4577   1
  -5  -8  -5 2104.21 86.1649   1
   8  -5   5 2226.70 57.7445   1
  -4  -8  -5 560.183 39.8010   1
  -5  -4  -8 560.401 36.7216   1
  -3  -8  -5 1594.71 70.2110   1
  -5  -3  -8 1663.70 64.8233   1
   2   8  -5 17.5931 15.1150   1
  -2  -8  -5 31.5595 17.9975   1
  -5  -2  -8 1.73872 14.1217   1
   1   8  -5 2879.78 89.6746   1
  -5  -1  -8 2901.36 88.9157   1
  -1  -8  -5 2875.05 99.0617   1
  -5   0  -8 6889.31 170.651   1
   0   8  -5 6750.60 171.860   1
   0  -8  -5 6462.24 183.256   1
  -1   8  -5 2779.36 72.9458   1
   1  -8  -5 2896.03 88.7949   1
   8   5   2 14.2609 16.9922   1
  -2   8  -5 36.7700 10.5135   1
  -5   2  -8 33.7385 9.19885   1
   3   8   5 1541.64 67.0638   1
  -5   3  -8 1520.76 45.6619   1
  -5   4  -8 586.851 21.8546   1
   8   5   4 614.922 41.9273   1
   4   8   5 552.214 41.9364   1
   8   5   5 2305.23 87.9364   1
   5   8   5 2111.02 87.4744   1
   6   8   5 209.948 31.2878   1
   8   5   6 420.026 36.1076   1
   7   8   5 4801.00 152.928   1
   8   5   7 4461.96 144.917   1
  -8  -6  -7 456.416 38.0475   1
  -6  -5  -8 49.1883 22.3543   1
  -6  -4  -8 1156.96 54.3456   1
  -4  -8  -6 1067.22 58.2096   1
  -6  -3  -8 4357.55 129.823   1
  -3  -8  -6 4317.23 138.197   1
  -6  -2  -8 2917.76 93.1477   1
  -2  -8  -6 2766.56 100.412   1
  -6  -1  -8 1677.70 61.3245   1
  -1  -8  -6 1563.27 68.5404   1
   8   6  -1 1614.32 71.0673   1
   0  -8  -6 3666.06 117.150   1
   0   8  -6 3573.75 103.267   1
   8   6   0 3413.22 117.682   1
  -6   0  -8 3630.50 103.627   1
  -1   8  -6 1630.73 54.9534   1
   8   6   1 1501.91 69.3242   1
  -6   1  -8 1612.12 54.3862   1
  -2   8  -6 2855.30 81.3361   1
   8   6   2 2815.40 102.020   1
  -6   2  -8 2915.33 81.0034   1
   8   6   3 3958.46 132.748   1
  -6   3  -8 4236.25 106.530   1
  -6   4  -8 1084.00 32.8314   1
   8   6   4 1028.50 56.8246   1
   4   8   6 1130.10 57.9705   1
   6   4   8 992.590 52.5842   1
   5   8   6 8.42671 20.6744   1
   8   6   5 28.0221 18.2468   1
   6   5   8 9.98998 17.8425   1
   8   6   6 3324.60 116.191   1
   6   6   8 3057.12 110.377   1
   6   8   6 3147.20 114.197   1
   6   7   8 366.312 36.3300   1
   8   6   7 442.463 39.4441   1
   7   8   6 343.375 38.3709   1
  -7  -6  -8 2163.92 87.1972   1
  -7  -5  -8 9703.95 259.951   1
  -7  -4  -8 8580.96 230.951   1
  -3  -8  -7 8347.95 231.555   1
  -7  -3  -8 8314.44 222.378   1
  -2  -8  -7 1348.12 65.1379   1
   8   7  -2 1502.13 68.2355   1
  -7  -2  -8 1347.77 58.0653   1
   8   7  -1 17109.1 428.871   1
  -7  -1  -8 17092.5 411.336   1
  -1  -8  -7 17087.7 426.134   1
   8   7   0 910.360 53.3378   1
   0  -8  -7 914.072 50.8527   1
  -7   0  -8 945.555 41.7334   1
   7   1   8 16438.8 409.000   1
   8   7   1 17684.6 428.411   1
  -7   1  -8 17111.7 401.642   1
   7   2   8 1276.42 55.7577   1
  -7   2  -8 1261.84 44.8062   1
   8   7   2 1231.10 63.4923   1
  -2   8  -7 1361.00 46.1902   1
   7   3   8 8378.11 223.949   1
  -7   3  -8 8350.88 200.730   1
   8   7   3 8443.07 235.294   1
  -7   4  -8 8561.44 198.581   1
   8   7   4 8519.59 238.431   1
   7   4   8 8139.69 228.243   1
   5   8   7 8816.29 250.289   1
   7   5   8 8784.73 245.211   1
   7   6   8 2285.56 91.2051   1
   6   8   7 2283.17 93.4414   1
   8   7   6 2252.19 93.4657   1
   7   8   7 9359.27 261.703   1
   8   7   7 9231.31 260.671   1
   7   7   8 9389.82 259.221   1
  -8  -7  -8 42.5141 23.7799   1
  -8  -6  -8 1595.70 73.3859   1
  -8  -5  -8 350.056 33.6488   1
  -8  -4  -8 6690.70 188.906   1
  -8  -3  -8-2.17604 17.7742   1
  -8  -8  -2 5493.44 165.994   1
  -8  -2  -8 5321.74 152.409   1
  -2  -8  -8 5286.40 163.295   1
   8   8  -2 5330.06 166.026   1
  -1  -8  -8 752.968 46.8632   1
   8   8  -1 706.870 49.6301   1
  -8  -1  -8 641.520 37.9115   1
   8  -1   8 628.982 33.5155   1
  -8   0  -8 15872.0 381.133   1
   8   8   0 15755.0 404.538   1
   8   0   8 15914.7 382.915   1
  -8   1  -8 674.183 33.3439   1
   8   1   8 720.069 40.7321   1
   8   8   1 689.629 49.6937   1
  -8   2  -8 5640.25 141.402   1
   8   8   2 5642.01 171.936   1
   8   8   3-6.13873 25.3663   1
  -8   3  -8 14.9588 9.54885   1
   8   3   8 32.2265 20.9000   1
   8   8   4 6348.28 191.497   1
   8   4   8 6259.91 182.520   1
   8   5   8 390.088 36.8904   1
   8   8   5 389.366 40.3622   1
   8   6   8 1569.75 73.8768   1
   6   8   8 1465.54 73.0048   1
   8   8   6 1524.56 76.4327   1
   7   8   8 22.6882 21.8896   1
   8   8   7 69.9248 26.5671   1
   8   7   8 44.5013 24.8898   1
   8   8   8 183.276 33.8661   1
   0  -9   0 29.2973 20.9910   1
   0   9   0 31.1784 20.0441   1
  -1   9   0 25.5099 18.7103   1
  -1  -9   0 24.5297 20.7394   1
   1  -9   0 42.7069 20.4261   1
   2  -9   0 14957.2 367.541   1
  -2  -9   0 15226.8 374.754   1
   9   0   3 39.5761 14.7571   1
  -3  -9   0-4.56150 19.9027   1
   3  -9   0-5.02479 15.2800   1
   9   0   4 28393.1 674.580   1
  -4  -9   0 29669.7 688.975   1
   4  -9   0 28860.0 672.970   1
   5  -9   0 3.15022 13.3850   1
  -5  -9   0 2.56488 20.1973   1
   9   0   5-1.66688 14.1648   1
  -6  -9   0 1237.27 62.0010   1
   9   0   6 1285.51 53.6476   1
   9   0   7-13.9722 17.7104   1
  -9   0  -7-4.65200 16.2556   1
   7   9   0 17.4179 22.8599   1
   8   9   0 15783.5 409.495   1
   9   0   8 15592.0 386.566   1
  -9   0  -8 16362.2 385.021   1
   8   9  -1 8955.23 252.161   1
  -1  -8  -9 8618.10 246.353   1
   9  -1   8 8894.88 227.375   1
  -9  -1  -8 9436.84 234.477   1
  -9  -1  -7 10250.9 260.593   1
  -7  -9  -1 10638.9 280.275   1
   9  -1   7 10176.3 256.462   1
   9  -1   6 8086.72 211.991   1
  -6  -9  -1 8696.50 233.954   1
  -9  -1  -6 8491.59 216.628   1
  -5  -9  -1 85.8507 23.4910   1
   9  -1   5 94.8026 16.5876   1
   5  -9   1 103.376 15.7181   1
   9  -1   4 231.268 21.5698   1
  -4  -9  -1 200.976 27.5221   1
   4  -9   1 207.678 20.8755   1
  -3  -9  -1 9693.53 264.415   1
   3  -9   1 10425.3 254.019   1
   2  -9   1 4711.60 131.482   1
  -2  -9  -1 4522.52 139.141   1
   1  -9   1 76879.1 1720.42   1
  -1   9   1 75690.9 1721.55   1
  -1  -9  -1 75208.0 1727.20   1
   1   9  -1 74867.8 1723.46   1
   0  -9  -1 6.16731 17.9471   1
   0  -9   1 38.6000 21.2404   1
   0   9  -1 37.4725 19.1760   1
   1  -9  -1 78897.7 1779.99   1
  -1   9  -1 77169.0 1773.03   1
  -1  -9   1 78738.5 1779.80   1
  -2   9  -1 4381.14 127.079   1
   2  -9  -1 4822.82 134.833   1
  -2  -9   1 4586.66 136.643   1
   3  -9  -1 10472.3 263.303   1
  -3  -9   1 10641.1 271.362   1
   9   1   3 10131.6 263.153   1
   9   1   4 207.556 23.5396   1
   4  -9  -1 135.907 20.4694   1
  -4  -9   1 168.727 25.3643   1
   9   1   5 85.0305 19.3268   1
   6   9   1 7869.04 223.964   1
   9   1   6 7940.95 210.525   1
   9   1   7 10411.5 266.078   1
   7   9   1 10323.3 281.808   1
  -9   1  -8 9360.44 231.655   1
   8   9   1 9057.14 258.746   1
   9   1   8 9249.70 241.656   1
  -9  -2  -8 2538.19 89.8232   1
   9  -2   8 2531.80 78.3317   1
  -9  -2  -7 534.458 36.1570   1
  -7  -9  -2 422.815 39.4385   1
   9  -2   7 445.430 27.4189   1
   6  -9   2 1360.35 48.9669   1
   9  -2   6 1436.60 50.3724   1
  -9  -2  -6 1312.07 56.8053   1
  -6  -9  -2 1281.02 64.5268   1
   9  -2   5 14241.2 335.582   1
  -5  -9  -2 13510.2 357.633   1
   5  -9   2 14051.8 335.914   1
   9  -2   4 3357.91 96.2514   1
   4  -9   2 3371.49 97.3196   1
  -4  -9  -2 3248.56 112.078   1
   3  -9   2 9306.13 233.232   1
  -3  -9  -2 9313.19 249.318   1
  -2  -9  -2 19360.9 477.072   1
   2  -9   2 19957.2 463.871   1
   2   9  -2 19224.1 471.895   1
   1  -9   2 16468.2 398.833   1
  -1  -9  -2 16339.5 408.713   1
   1   9  -2 16901.9 404.169   1
   0   9  -2 12.0577 18.2505   1
   0  -9   2 3.50977 17.5912   1
   0  -9  -2 12.9994 20.2241   1
   1  -9  -2 16967.4 404.551   1
  -1   9  -2 15907.1 395.295   1
  -1  -9   2 16700.0 401.353   1
  -2   9  -2 19292.8 460.850   1
   2  -9  -2 19081.5 470.832   1
  -2  -9   2 19698.4 472.673   1
   9   2   2 20329.9 473.359   1
   9   2   3 10349.0 259.065   1
   3  -9  -2 9725.84 255.960   1
   9   2   4 3357.90 107.301   1
   5   9   2 13787.0 357.988   1
   9   2   5 14013.3 347.739   1
   6   9   2 1342.64 67.9625   1
   9   2   6 1398.75 62.0457   1
   7   9   2 454.614 42.9515   1
   9   2   7 493.215 37.1009   1
   9   2   8 2554.04 90.9488   1
   8   9   2 2487.73 102.292   1
  -8  -9  -3 21789.6 561.616   1
  -9  -3  -8 23585.8 549.726   1
   9  -3   7 693.055 29.6375   1
  -9  -3  -7 681.834 42.0524   1
   7  -9   3 644.351 29.2473   1
  -7  -9  -3 675.839 47.5529   1
  -6  -9  -3 11235.7 314.381   1
   6  -9   3 12114.8 287.450   1
   9  -3   6 12158.7 286.719   1
  -9  -3  -6 12092.6 305.055   1
  -5  -9  -3 1312.83 65.7159   1
  -9  -3  -5 1367.76 59.9142   1
   5  -9   3 1481.26 49.9037   1
   9  -3   5 1453.35 48.9677   1
   4  -9   3 1282.77 46.3325   1
  -4  -9  -3 1174.84 60.1996   1
   3  -9   3 191.081 18.3003   1
   3   9  -3 215.075 26.3303   1
  -3  -9  -3 221.120 28.6653   1
  -2  -9  -3 17468.3 432.949   1
   2  -9   3 17511.7 415.395   1
   2   9  -3 17477.3 424.822   1
   1  -9   3 398.345 27.8558   1
  -1  -9  -3 440.446 35.7607   1
   1   9  -3 420.564 30.5021   1
   0  -9   3 3.38302 17.9367   1
   0  -9  -3 54.3365 20.1725   1
   0   9  -3 56.3295 17.0080   1
  -1   9  -3 422.836 29.4914   1
   1  -9  -3 456.701 34.6274   1
   2  -9  -3 17249.8 418.326   1
  -2   9  -3 16861.6 405.047   1
   9   3   2 17280.0 420.465   1
  -3   9  -3 205.391 17.8339   1
   9   3   3 190.087 25.8470   1
   4   9   3 1175.42 60.8095   1
   9   3   4 1315.39 59.3378   1
   5   9   3 1416.11 68.7258   1
   9   3   5 1406.59 63.3253   1
   6   9   3 11766.0 312.270   1
   9   3   6 11636.0 302.238   1
   7   9   3 626.614 48.5650   1
   9   3   7 749.412 46.0102   1
   9   3   8 23198.2 554.663   1
   8   9   3 22474.0 568.418   1
   8  -9   4 7750.38 187.876   1
  -9  -4  -8 7746.39 214.763   1
  -7  -9  -4 2380.22 97.8538   1
   9  -4   7 2491.42 68.5040   1
   7  -9   4 2574.39 71.2803   1
  -9  -4  -7 2554.08 92.0778   1
  -6  -9  -4 78.5379 23.8232   1
   6  -9   4 74.9837 11.2636   1
  -9  -4  -6 70.0680 20.6621   1
   9  -4   6 83.4672 11.3942   1
   9  -4   5 1716.57 51.1023   1
   5  -9   4 1607.27 51.4920   1
  -9  -4  -5 1616.19 68.2008   1
   4   9  -4 18.3817 18.7755   1
  -4  -4  -9 36.9201 16.4480   1
   4  -9   4 21.1497 9.43058   1
  -4  -9  -4 24.5859 21.1058   1
  -3  -9  -4 273.670 30.2059   1
   3   9  -4 267.797 28.0382   1
  -4  -3  -9 309.310 27.2109   1
   3  -9   4 306.603 20.8539   1
  -4  -2  -9 3754.43 112.506   1
   2  -9   4 3682.88 105.094   1
  -2  -9  -4 3836.15 123.271   1
   2   9  -4 3614.62 113.399   1
  -4  -1  -9 3727.62 109.465   1
  -1  -9  -4 3728.77 121.177   1
   1   9  -4 3684.62 111.587   1
   0  -9  -4-2.33348 16.0139   1
   0   9  -4-3.19178 14.6937   1
   9   4   1 3615.18 117.976   1
  -1   9  -4 3586.69 105.078   1
   1  -9  -4 3728.26 117.613   1
   9   4   2 4021.32 122.912   1
   2  -9  -4 3748.14 119.335   1
  -2   9  -4 3621.01 104.760   1
   9   4   3 308.894 30.6606   1
  -3   9  -4 325.840 20.8811   1
   3   9   4 288.778 32.1745   1
   9   4   4 2.44679 18.1378   1
   4   9   4 16.3053 18.8053   1
   5   9   4 1422.41 70.6242   1
   9   4   5 1584.41 68.8897   1
   6   9   4 64.0547 21.9172   1
   9   4   6 171.661 26.8795   1
   7   9   4 2605.03 104.845   1
   9   4   7 2698.42 98.5695   1
   8   9   4 7917.36 232.011   1
   9   4   8 7900.86 221.359   1
  -9  -5  -8 1053.96 57.8303   1
   8  -9   5 1089.31 33.3167   1
  -9  -5  -7 1016.79 54.6956   1
   7  -9   5 874.914 28.9466   1
  -9  -5  -6 207.849 28.6630   1
  -6  -9  -5 239.768 32.1091   1
   6  -9   5 254.428 14.2193   1
   9  -5   6 244.355 13.6099   1
  -9  -5  -5 8316.71 227.228   1
   9  -5   5 8368.66 197.841   1
  -5  -9  -5 7906.10 232.210   1
  -5  -5  -9 8297.90 226.295   1
  -4  -9  -5 169.249 27.6482   1
  -5  -4  -9 183.306 25.0193   1
   4   9  -5 167.403 24.1779   1
  -5  -3  -9 7986.03 211.141   1
  -3  -9  -5 7904.42 221.955   1
   3   9  -5 7750.44 212.019   1
  -2  -9  -5 3169.75 108.240   1
  -5  -2  -9 3037.88 97.0801   1
   2   9  -5 2961.62 98.4133   1
  -1  -9  -5 10777.6 286.330   1
  -5  -1  -9 11219.2 272.999   1
   1   9  -5 10723.5 273.804   1
   9   5   0-10.1360 17.3919   1
   0  -9  -5 22.0848 18.1910   1
   0   9  -5 18.7838 14.5473   1
  -5   0  -9 13.0467 12.1190   1
  -1   9  -5 10806.2 268.169   1
  -5   1  -9 11075.6 266.058   1
   9   5   1 10690.6 286.566   1
   1  -9  -5 11047.9 285.061   1
  -2   9  -5 3019.49 89.0310   1
   9   5   2 3006.04 107.188   1
  -5   2  -9 3196.16 87.4192   1
   9   5   3 8272.41 224.297   1
  -5   3  -9 8149.95 195.662   1
   3   9   5 7817.04 223.485   1
  -3   9  -5 7935.48 197.889   1
   4   9   5 156.668 27.3732   1
   9   5   4 155.146 26.5119   1
   5   9   5 8302.99 232.417   1
   9   5   5 8010.36 228.306   1
   6   9   5 223.789 31.5862   1
   9   5   6 242.620 31.0507   1
   7   9   5 928.460 57.8943   1
   9   5   7 885.352 53.6203   1
   8   9   5 1150.73 66.1917   1
   9   5   8 1042.22 58.6106   1
  -9  -6  -8 11.5784 19.8660   1
  -9  -6  -7 166.173 28.3635   1
  -9  -6  -6 1830.41 79.1587   1
  -6  -6  -9 1983.79 81.7459   1
  -6  -5  -9 327.541 33.1844   1
  -5  -9  -6 317.599 34.6527   1
  -4  -9  -6 235.258 30.3599   1
  -6  -4  -9 276.226 30.3422   1
  -6  -3  -9 662.806 40.6569   1
  -3  -9  -6 596.084 44.3577   1
  -2  -9  -6 9232.37 249.049   1
   2   9  -6 8891.03 234.598   1
  -6  -2  -9 9063.08 235.472   1
   9   6  -1 11364.7 301.988   1
  -1  -9  -6 11583.8 301.370   1
   1   9  -6 11187.4 286.506   1
  -6  -1  -9 11770.0 286.764   1
   0   9  -6 15.7037 14.3264   1
   0  -9  -6 5.12920 18.3202   1
   9   6   0 21.8054 20.7747   1
  -6   0  -9 7.62271 12.6731   1
  -1   9  -6 10926.5 274.681   1
  -6   1  -9 11296.7 274.016   1
   1  -9  -6 11165.5 293.569   1
   9   6   1 11852.9 299.737   1
   9   6   2 9030.10 248.743   1
  -6   2  -9 9185.80 222.666   1
  -2   9  -6 9004.99 223.889   1
   9   6   3 571.869 43.3874   1
  -3   9  -6 633.705 28.4298   1
  -6   3  -9 650.153 27.4207   1
   9   6   4 268.159 33.3421   1
   4   9   6 250.826 31.0058   1
  -6   4  -9 267.639 15.7271   1
   5   9   6 389.005 38.9228   1
   9   6   5 388.932 38.1725   1
  -6   5  -9 428.189 16.9879   1
   9   6   6 1965.88 86.2152   1
   6   9   6 2072.85 88.9471   1
   7   9   6 149.502 28.7566   1
   9   6   7 169.821 30.6671   1
   8   9   6 42.0487 24.2771   1
   9   6   8 68.2804 25.2309   1
  -9  -7  -8 3270.53 118.780   1
  -7  -7  -9 27.4981 20.0895   1
  -9  -7  -7 42.3805 21.8017   1
  -7  -6  -9 5039.48 157.745   1
  -7  -5  -9 14008.2 358.356   1
  -4  -9  -7 177.304 33.0750   1
  -7  -4  -9 244.882 29.2952   1
  -7  -3  -9 10276.2 265.671   1
  -3  -9  -7 10028.9 277.031   1
  -7  -2  -9 7066.81 191.761   1
  -2  -9  -7 7055.43 204.909   1
  -7  -1  -9 3720.17 111.262   1
   9   7  -1 3497.16 124.339   1
  -1  -9  -7 3734.15 124.821   1
   0  -9  -7 67.3252 23.5041   1
   0   9  -7 7.92642 13.7712   1
  -7   0  -9 33.2471 15.1810   1
   9   7   0 5.78815 22.6510   1
  -1   9  -7 3560.56 102.235   1
  -7   1  -9 3631.44 101.967   1
   9   7   2 6803.51 201.728   1
  -7   2  -9 6983.94 173.898   1
  -2   9  -7 6814.05 174.687   1
   9   7   3 10032.3 277.064   1
  -3   9  -7 10105.9 243.731   1
  -7   3  -9 10175.3 242.478   1
  -7   4  -9 270.017 15.4641   1
   9   7   4 278.748 35.5511   1
   5   9   7 12901.4 342.786   1
   7   5   9 12987.5 336.315   1
   9   7   5 12980.1 344.950   1
   9   7   6 5175.65 165.560   1
   7   6   9 5031.63 159.791   1
   6   9   7 5010.21 162.924   1
   7   7   9 21.9976 21.7750   1
   9   7   7 46.2846 24.1805   1
   9   7   8 3326.10 122.103   1
   7   8   9 3149.04 121.407   1
   8   9   7 3382.15 126.251   1
  -9  -8  -8 3901.87 137.158   1
  -8  -8  -9 3929.89 138.148   1
  -8  -7  -9 269.826 34.3475   1
  -8  -6  -9 1708.92 77.2557   1
   9  -8   5 49.2713 7.36144   1
  -8  -5  -9 48.8803 21.5468   1
  -8  -4  -9 1715.18 73.6480   1
  -3  -9  -8 274.129 35.6567   1
  -8  -3  -9 340.902 32.4125   1
  -2  -9  -8 15549.4 397.841   1
  -8  -2  -9 15587.4 383.240   1
   9   8  -2 15316.4 398.926   1
   9   8  -1 852.897 56.5463   1
  -1  -9  -8 799.574 53.1082   1
  -8  -1  -9 865.805 44.7757   1
   9   8   0 6.13758 26.7797   1
  -8   0  -9 9.83122 17.4239   1
   0  -9  -8 36.8756 23.3083   1
  -8   1  -9 813.392 39.1947   1
   9   8   1 997.576 60.1372   1
  -8   2  -9 15538.3 369.021   1
   9   8   2 15530.5 403.182   1
   8   2   9 15552.2 385.404   1
  -2   9  -8 15718.8 370.260   1
   9   8   3 339.417 38.7330   1
  -8   3  -9 299.009 19.3567   1
  -3   9  -8 322.155 20.3529   1
   8   3   9 308.558 30.6878   1
   9   8   4 1632.81 80.2155   1
  -8   4  -9 1674.65 48.8019   1
   8   4   9 1733.09 74.3575   1
  -5   9  -8 56.4289 7.72286   1
   9   8   5 84.7085 25.6796   1
   8   5   9 39.3675 21.7553   1
   6   9   8 1663.00 80.6359   1
   8   6   9 1694.18 78.6812   1
   8   7   9 272.276 36.3925   1
   7   9   8 348.599 39.2714   1
   9   8   7 298.484 40.4168   1
   8   9   8 4126.48 145.856   1
   8   8   9 4055.07 143.111   1
   9   8   8 4049.31 144.159   1
  -9  -9  -9 14202.4 379.105   1
  -9  -9  -8 575.259 49.9771   1
  -9  -8  -9 693.106 52.1966   1
  -8  -9  -9 549.589 49.4974   1
  -9  -7  -9 589.180 47.9294   1
  -9  -6  -9 164.365 29.3537   1
  -9  -5  -9 119.403 25.6465   1
   9  -9   5 147.330 11.4604   1
  -9  -4  -9 20.5126 20.9486   1
  -9  -3  -9 89.2518 22.3066   1
   9   9  -2 7168.12 214.013   1
  -2  -9  -9 6987.35 210.664   1
  -9  -2  -9 7390.62 198.078   1
  -9  -1  -9 40269.3 924.017   1
  -1  -9  -9 39400.8 943.250   1
   9   9  -1 39644.8 946.743   1
   9   0   9 32.5643 19.3694   1
  -9   0  -9 3.38637 22.2015   1
   9   9   0-9.77387 31.3560   1
   0  -9  -9 20.9939 26.4397   1
   9   9   1 39522.0 937.161   1
   9   1   9 39246.6 913.979   1
  -9   1  -9 39337.1 904.138   1
   9   9   2 7865.20 226.039   1
   9   2   9 7468.59 206.373   1
  -9   2  -9 7457.49 189.659   1
  -3   9  -9 81.6672 13.0514   1
  -9   3  -9 85.0173 13.5545   1
   9   3   9 122.451 25.2149   1
   9   4   9 2.72655 21.2048   1
   9   9   4 66.6929 26.7582   1
   9   9   5 144.049 31.8906   1
  -5   9  -9 144.609 10.5545   1
   9   9   6 150.503 30.0053   1
   9   6   9 158.667 29.6875   1
   9   9   7 624.333 52.7701   1
   7   9   9 657.554 52.8385   1
   9   7   9 596.776 48.7626   1
   9   8   9 551.301 50.2687   1
   8   9   9 700.319 55.8294   1
   9   9   8 538.493 50.6524   1
   9   9   9 13860.7 374.953   1
   0 -10   0 86006.8 1923.42   1
   0  10   0 83044.6 1919.91   1
   1 -10   0 29.0092 23.4604   1
  -1  10   0 62.3924 24.8666   1
  -1 -10   0 38.4224 24.6274   1
   1  10   0 59.6140 26.7695   1
   2 -10   0 26042.4 604.556   1
  -2 -10   0 24842.8 609.922   1
  10   0   3 44.4295 17.2283   1
   3 -10   0 41.9821 17.9975   1
  -3 -10   0 42.3810 22.5447   1
  -4 -10   0 263.656 31.5538   1
  10   0   4 258.556 24.7658   1
   4 -10   0 276.798 25.2287   1
  10   0   5 5.52848 15.4045   1
   5 -10   0 14.0774 14.1195   1
  -5 -10   0 13.8889 18.2528   1
  10   0   6 9.43338 15.2310   1
  -6 -10   0 20.3557 19.6228   1
  10   0   7-7.71695 20.4400   1
 -10   0  -8 7309.60 193.460   1
  10   0   8 7260.56 197.002   1
   8  10   0 7493.85 218.623   1
 -10   0  -9 5.33806 19.2459   1
   9  10   0 6.91765 30.9505   1
  10   0   9 32.9722 20.3347   1
  -1  -9 -10 81.9190 28.6337   1
  10  -1   9 64.0622 19.9144   1
   9  10  -1 78.9790 33.9027   1
 -10  -1  -9 29.8598 22.4166   1
 -10  -1  -8 1338.31 58.2552   1
  10  -1   8 1303.96 55.1488   1
 -10  -1  -7 7331.99 194.611   1
  -7 -10  -1 7249.28 211.758   1
  10  -1   7 7182.85 191.844   1
  -6 -10  -1 998.891 57.4442   1
  10  -1   6 1116.06 48.6570   1
   6 -10   1 1054.49 45.9905   1
  -5 -10  -1 860.941 53.1039   1
   5 -10   1 977.084 42.9927   1
  10  -1   5 866.303 42.5334   1
   4 -10   1 162.420 19.6650   1
  10  -1   4 184.956 21.2342   1
  -4 -10  -1 177.820 27.0729   1
   3 -10   1 5112.81 142.954   1
  -3 -10  -1 4947.91 153.715   1
   2  10  -1 2199.52 84.7862   1
   2 -10   1 2226.73 78.6762   1
  -2 -10  -1 2276.99 86.5404   1
  -1 -10  -1 995.853 53.7704   1
  -1  10   1 947.357 50.5200   1
   1  10  -1 964.178 52.6726   1
   1 -10   1 996.246 50.5695   1
   0 -10  -1 4697.77 139.085   1
   0  10   1 4392.64 135.032   1
   0 -10   1 4444.46 134.388   1
   0  10  -1 4560.02 134.841   1
  -1 -10   1 1033.69 53.0973   1
   1 -10  -1 975.734 51.5570   1
  -1  10  -1 939.092 47.6712   1
   2 -10  -1 2309.21 83.6764   1
  -2 -10   1 2299.69 85.8411   1
  -2  10  -1 2337.16 78.3616   1
   3 -10  -1 4964.68 145.572   1
  10   1   3 5192.15 147.667   1
  -3 -10   1 5099.53 153.651   1
  10   1   4 160.543 23.1064   1
   4 -10  -1 156.801 21.6387   1
  -4 -10   1 226.856 27.6839   1
  10   1   5 943.128 47.3574   1
   5 -10  -1 900.772 45.1013   1
  10   1   6 1089.89 52.2629   1
  10   1   7 7449.87 200.497   1
   7  10   1 7081.23 214.354   1
  10   1   8 1294.64 60.8983   1
   8  10   1 1365.56 74.7638   1
   9  10   1 38.5484 33.4589   1
 -10   1  -9 18.6712 19.6741   1
  10  -2   9 2589.60 82.5975   1
 -10  -2  -9 2858.35 96.6599   1
  -8 -10  -2 10267.7 285.160   1
  10  -2   8 10351.2 254.938   1
 -10  -2  -8 10201.0 266.733   1
  10  -2   7 13231.3 321.355   1
  -7 -10  -2 13303.5 349.644   1
 -10  -2  -7 13248.7 331.426   1
   7 -10   2 13144.6 320.020   1
  10  -2   6 5503.39 148.203   1
   6 -10   2 5509.83 147.771   1
  -6 -10  -2 5668.26 171.833   1
   5 -10   2 4906.32 133.990   1
  10  -2   5 4785.01 133.326   1
  -5 -10  -2 4886.03 154.151   1
  -4 -10  -2 2697.53 101.620   1
  10  -2   4 2896.31 86.6159   1
   4 -10   2 2644.16 86.1423   1
   3 -10   2 11678.3 298.627   1
  -3 -10  -2 12318.6 316.447   1
   3  10  -2 12559.9 312.628   1
   2  10  -2 11609.0 294.657   1
  -2 -10  -2 11437.2 298.852   1
   2 -10   2 11295.6 285.541   1
   1  10  -2 11378.1 295.403   1
   1 -10   2 11894.4 292.763   1
  -1 -10  -2 11633.6 302.419   1
   0 -10  -2 46711.3 1090.81   1
   0 -10   2 47891.6 1083.45   1
   0  10  -2 46274.7 1081.85   1
  -1 -10   2 11441.7 292.178   1
  -1  10  -2 11339.5 285.839   1
   1 -10  -2 11500.7 294.853   1
   2 -10  -2 11806.9 301.505   1
  -2 -10   2 11944.2 302.338   1
  10   2   2 11617.5 300.562   1
  -2  10  -2 11772.4 290.523   1
   3 -10  -2 12300.3 308.009   1
  10   2   3 11895.5 308.678   1
  -3 -10   2 12206.6 312.589   1
  10   2   4 2919.69 98.4649   1
   4 -10  -2 2834.74 96.0305   1
  10   2   5 4952.01 147.564   1
   6  10   2 5240.55 170.362   1
  10   2   6 5706.61 162.078   1
  10   2   7 13387.1 338.980   1
   7  10   2 13123.6 351.982   1
   8  10   2 10454.8 286.344   1
  10   2   8 9975.47 268.554   1
   9  10   2 2458.74 108.774   1
  10   2   9 2712.11 97.0449   1
 -10  -3  -9 10876.0 276.542   1
  -9 -10  -3 9892.56 289.053   1
 -10  -3  -8 2195.07 83.2720   1
   8 -10   3 2158.89 67.0224   1
  10  -3   8 2091.95 66.1673   1
  -8 -10  -3 1998.56 91.2887   1
   7 -10   3 5778.74 146.838   1
 -10  -3  -7 5521.35 162.303   1
  10  -3   7 5627.66 146.015   1
  10  -3   6 123.875 15.8209   1
 -10  -3  -6 69.7390 20.6317   1
  -6 -10  -3 88.6610 25.3550   1
   6 -10   3 87.1475 15.3511   1
   5 -10   3 647.862 31.8207   1
  10  -3   5 630.553 30.8083   1
  -5 -10  -3 552.246 43.4268   1
  -4 -10  -3 246.895 30.7032   1
   4 -10   3 262.512 21.8308   1
   4  10  -3 252.463 29.1526   1
  -3  -4 -10 252.763 28.0971   1
  -3 -10  -3 2863.46 104.437   1
   3 -10   3 2749.89 87.5959   1
   3  10  -3 2982.02 100.482   1
   2 -10   3 3032.36 95.1822   1
  -2 -10  -3 3155.14 109.471   1
   2  10  -3 3076.50 102.466   1
   1 -10   3 38.8464 17.9372   1
   1  10  -3 62.1415 20.5862   1
  -1 -10  -3 46.4654 20.7377   1
   0 -10  -3 7641.69 207.979   1
   0  10  -3 7030.76 196.296   1
   0 -10   3 7645.26 199.059   1
  -1  10  -3 66.3300 17.7797   1
  -1 -10   3 20.4840 21.0984   1
   1 -10  -3 7.13546 19.7809   1
   2 -10  -3 2994.08 102.544   1
  -2  10  -3 3031.74 92.2562   1
  10   3   2 2925.91 102.707   1
  -3  10  -3 2772.56 84.3987   1
  10   3   3 2847.27 98.8073   1
   3 -10  -3 2780.54 97.0432   1
  10   3   4 306.456 31.2898   1
   5  10   3 630.481 46.3583   1
  10   3   5 601.188 41.6846   1
   6  10   3 89.4582 25.7278   1
  10   3   6 108.805 24.7592   1
  10   3   7 5514.50 164.170   1
   7  10   3 5267.64 173.342   1
   8  10   3 2249.90 98.1608   1
  10   3   8 2114.80 86.5079   1
   9  10   3 10853.1 300.403   1
  10   3   9 10402.8 281.387   1
   9 -10   4 2151.77 64.2588   1
 -10  -4  -9 2012.68 84.6434   1
  -8 -10  -4 922.101 60.7500   1
  10  -4   8 1022.92 36.3815   1
 -10  -4  -8 979.439 55.2591   1
   8 -10   4 1017.00 38.4225   1
  10  -4   7 8229.56 196.094   1
  -7 -10  -4 7650.52 230.476   1
 -10  -4  -7 7901.62 220.553   1
   7 -10   4 7926.03 197.108   1
 -10  -4  -6 1425.70 65.4985   1
  -6 -10  -4 1391.95 71.7583   1
  10  -4   6 1448.50 48.2197   1
   6 -10   4 1448.26 49.2833   1
   5  10  -4 1485.29 67.9419   1
  10  -4   5 1377.74 47.9407   1
  -4  -5 -10 1397.05 64.3448   1
   5 -10   4 1429.94 49.6778   1
  -5 -10  -4 1270.46 67.7346   1
   4  10  -4 4561.35 140.923   1
  -4  -4 -10 4719.52 139.132   1
  -4 -10  -4 4481.80 145.890   1
   4 -10   4 4433.58 122.376   1
   3  10  -4 5852.74 172.350   1
   3 -10   4 6139.85 158.762   1
  -4  -3 -10 6169.33 170.324   1
  -3 -10  -4 5791.52 179.042   1
  -2 -10  -4 247.085 31.3124   1
  -4  -2 -10 301.445 27.4730   1
   2 -10   4 295.679 23.9337   1
   2  10  -4 231.878 26.5121   1
   1  10  -4 4312.58 128.799   1
  -1 -10  -4 4353.60 138.597   1
   0 -10  -4 2053.72 82.8661   1
   0  10  -4 2047.78 73.3632   1
  10   4   1 4296.41 137.349   1
  -1  10  -4 4375.06 124.792   1
   1 -10  -4 4381.73 136.798   1
   2 -10  -4 241.216 29.4255   1
  10   4   2 287.091 30.7815   1
  -2  10  -4 265.071 23.1688   1
  -3  10  -4 5990.81 155.951   1
  10   4   3 6115.54 176.485   1
   3 -10  -4 5908.62 173.181   1
   4  10   4 4411.95 142.712   1
  10   4   4 4234.95 137.249   1
  10   4   5 1415.03 66.8308   1
   5  10   4 1363.59 69.7598   1
  10   4   6 1385.68 67.7526   1
   6  10   4 1402.40 71.9991   1
  10   4   7 7770.11 221.055   1
   7  10   4 7795.15 229.552   1
   8  10   4 995.494 64.6793   1
  10   4   8 1007.85 57.5466   1
  10   4   9 2220.04 91.3267   1
   9  10   4 2176.41 99.3930   1
 -10  -5  -9 11746.0 310.654   1
   9 -10   5 11708.2 274.597   1
   8 -10   5 565.919 23.6512   1
 -10  -5  -8 528.193 41.9658   1
 -10  -5  -7 4376.43 141.869   1
   7 -10   5 4622.76 114.418   1
  10  -5   7 4509.80 111.931   1
   6 -10   5 636.869 27.3602   1
   6  10  -5 541.298 44.1472   1
  -6 -10  -5 639.080 49.9007   1
 -10  -5  -6 592.438 43.3508   1
  10  -5   6 746.067 27.5750   1
  -5  -6 -10 645.993 46.0908   1
  -5  -5 -10 490.747 37.9921   1
  -5 -10  -5 457.338 42.3980   1
 -10  -5  -5 553.458 40.3821   1
   5  10  -5 413.297 37.6669   1
   5 -10   5 491.534 24.6071   1
  10  -5   5 500.126 24.2061   1
  -5  -4 -10 408.108 34.1636   1
  -4 -10  -5 387.814 37.3967   1
   4  10  -5 311.139 32.3665   1
  -3 -10  -5 1389.44 67.7309   1
   3  10  -5 1259.22 59.9752   1
  -5  -3 -10 1385.09 59.8498   1
  -5  -2 -10 975.241 48.7670   1
  -2 -10  -5 1119.80 59.2338   1
   2  10  -5 999.294 50.6928   1
  -1 -10  -5 902.502 52.6652   1
  -5  -1 -10 913.840 43.5912   1
   1  10  -5 869.802 45.2692   1
   0  10  -5 2713.75 88.7107   1
   0 -10  -5 2761.53 100.304   1
  -5   0 -10 2751.06 85.9212   1
  10   5   0 2642.26 100.165   1
   1 -10  -5 964.773 53.1897   1
  10   5   1 995.939 54.9460   1
  -5   1 -10 898.710 40.0228   1
  -1  10  -5 874.102 42.2763   1
  10   5   2 1007.88 56.0056   1
  -2  10  -5 991.012 42.6171   1
   2 -10  -5 928.571 53.0552   1
  10   5   3 1269.76 64.8933   1
   3  10   5 1221.26 64.0171   1
  -3  10  -5 1390.65 49.1322   1
  10   5   4 353.212 37.7661   1
  -4  10  -5 414.543 22.6932   1
   4  10   5 392.778 37.4888   1
   5  10   5 410.019 39.5598   1
  10   5   5 510.996 41.9303   1
  10   5   6 716.811 48.4842   1
   6  10   5 669.462 51.0945   1
   7  10   5 4216.24 150.419   1
  10   5   7 4750.44 149.241   1
   8  10   5 597.787 51.0505   1
  10   5   8 658.119 48.3994   1
  10   5   9 11675.7 311.430   1
   9  10   5 11444.6 322.416   1
 -10  -6  -9 30.7612 24.8382   1
 -10  -6  -8 2031.15 86.5815   1
  -6  -7 -10 34.1895 23.2170   1
 -10  -6  -7 37.9353 19.7058   1
  -6 -10  -6 887.699 59.4386   1
 -10  -6  -6 1032.24 57.5593   1
  10  -6   6 1036.81 32.3130   1
  -6  -6 -10 1012.23 57.9905   1
  -5 -10  -6 686.140 51.5227   1
 -10  -6  -5 702.239 47.5742   1
  -6  -5 -10 785.517 48.5284   1
  -6  -4 -10 16218.5 394.245   1
   4  10  -6 15361.4 391.881   1
  -4 -10  -6 15383.2 403.190   1
   3  10  -6 5134.73 155.118   1
  -3 -10  -6 5378.07 168.410   1
  -6  -3 -10 5440.23 156.003   1
   2  10  -6 3998.73 125.764   1
  -2 -10  -6 4229.96 138.527   1
  -6  -2 -10 4196.32 126.229   1
  -6  -1 -10 5709.42 156.466   1
   1  10  -6 5419.55 155.936   1
  -1 -10  -6 5618.10 170.325   1
   0 -10  -6 682.964 45.7517   1
  -6   0 -10 662.149 36.0746   1
  10   6   0 614.930 47.3361   1
   0  10  -6 690.836 37.7728   1
  -6   1 -10 5730.01 147.844   1
  10   6   1 5515.18 169.055   1
   1 -10  -6 5489.40 166.307   1
  -1  10  -6 5219.11 148.478   1
  -6   2 -10 4132.61 114.198   1
   2 -10  -6 4248.32 136.531   1
  10   6   2 4003.34 137.559   1
  -2  10  -6 4297.05 117.185   1
  10   6   3 5015.14 159.405   1
  -6   3 -10 5253.29 131.531   1
   3  10   6 4719.09 158.436   1
  -3  10  -6 4994.93 133.570   1
   4  10   6 14516.1 348.025   1
  10   6   4 14879.0 348.427   1
  10   6   5 678.333 49.0872   1
  -6   5 -10 717.925 26.1548   1
   5  10   6 663.114 49.1754   1
   6  10   6 1002.86 62.5170   1
  10   6   6 1076.31 62.2549   1
  -6   6 -10 1058.64 31.5887   1
  10   6   7 29.2839 22.8946   1
   7  10   6 42.2650 23.5721   1
  10   6   8 1941.52 87.8416   1
   8  10   6 1989.41 93.4657   1
  10   6   9 16.5869 27.5732   1
   9  10   6 15.4351 29.2115   1
 -10  -7  -9-9.84998 26.8195   1
  -7  -9 -10-10.7580 31.6119   1
  -7  -8 -10 3243.47 119.810   1
 -10  -7  -8 2893.18 114.546   1
 -10  -7  -7 588.928 46.7682   1
  -7  -7 -10 522.969 47.1137   1
 -10  -7  -6 587.596 45.2334   1
  -7  -6 -10 579.469 45.0207   1
  -7  -5 -10 49.6102 21.8531   1
  -5 -10  -7 9.97791 28.2734   1
  -4 -10  -7 4318.26 147.300   1
  -7  -4 -10 4313.38 137.071   1
  -7  -3 -10 3697.04 118.073   1
  -3 -10  -7 3426.48 126.728   1
  -7  -2 -10 12976.2 325.054   1
   2  10  -7 12817.2 324.889   1
  -2 -10  -7 12887.1 340.267   1
   1  10  -7 2044.63 75.9413   1
  -1 -10  -7 1988.42 87.0439   1
  -7  -1 -10 2114.92 76.3249   1
  10   7   0 24870.6 625.713   1
  -7   0 -10 26402.6 603.912   1
   0  10  -7 25365.1 603.173   1
   0 -10  -7 25655.3 623.522   1
  -7   1 -10 2180.32 70.8992   1
   1 -10  -7 1987.67 85.2439   1
  -1  10  -7 2111.60 71.4871   1
  10   7   1 1912.26 86.6119   1
  10   7   2 12615.4 339.164   1
  -2  10  -7 12554.7 309.680   1
  -7   2 -10 13132.3 309.182   1
  10   7   3 3408.29 122.823   1
  -7   3 -10 3211.81 92.0128   1
  -3  10  -7 3443.21 94.7153   1
  10   7   4 4406.50 151.257   1
  -7   4 -10 4595.74 116.621   1
   5  10   7 29.8499 23.1435   1
  10   7   5 19.9324 26.3304   1
  -7   5 -10 24.1781 7.42702   1
   6  10   7 632.550 49.9942   1
  10   7   6 603.545 48.5031   1
   7  10   7 534.267 48.9138   1
  10   7   7 534.945 47.0773   1
   8  10   7 3205.71 124.461   1
  10   7   8 3107.07 121.200   1
   9  10   7-19.6174 30.8970   1
  10   7   9-7.07043 26.2061   1
  -8  -9 -10 396.324 45.9171   1
 -10  -8  -9 451.034 44.9242   1
  -8  -8 -10 4627.17 153.892   1
 -10  -8  -8 4247.25 150.090   1
 -10  -8  -7 3856.45 136.291   1
  -8  -7 -10 3848.13 136.023   1
  -8  -6 -10 633.989 47.5765   1
  -8  -5 -10 1023.86 57.5242   1
  -8  -4 -10 11893.0 304.883   1
  -4 -10  -8 11158.5 313.851   1
  -3 -10  -8 1878.06 88.3190   1
  -8  -3 -10 1909.44 77.3760   1
  -8  -2 -10 2411.18 87.2601   1
  10   8  -2 2287.68 99.1888   1
  -2 -10  -8 2524.97 100.190   1
  -1 -10  -8 560.349 46.7375   1
  10   8  -1 630.363 51.0378   1
  -8  -1 -10 568.900 39.3302   1
  10   8   0 36212.7 864.206   1
   0 -10  -8 37124.8 861.990   1
   0  10  -8 35428.7 836.827   1
  -8   0 -10 36189.7 837.238   1
  -8   1 -10 560.930 34.5238   1
  -1  10  -8 647.013 35.8001   1
  10   8   1 633.731 51.4046   1
   1 -10  -8 568.862 48.6257   1
  -2  10  -8 2355.21 75.0935   1
  -8   2 -10 2385.50 74.6741   1
  10   8   2 2411.62 100.780   1
  10   8   3 2049.48 91.3569   1
  -3  10  -8 1869.12 60.7200   1
  -8   3 -10 1883.48 59.6601   1
  10   8   4 11920.1 323.984   1
  -8   4 -10 11808.8 278.411   1
  10   8   5 1135.61 66.3385   1
  -8   5 -10 1112.91 33.5302   1
  10   8   6 593.409 51.9722   1
   6  10   8 692.592 53.7573   1
   7  10   8 3662.10 137.694   1
  10   8   7 3850.97 139.357   1
   8   7  10 3799.41 135.298   1
   8  10   8 4731.71 162.359   1
   8   8  10 4606.35 158.154   1
  10   8   8 4532.19 159.449   1
   9  10   8 528.675 51.5412   1
  10   8   9 461.616 48.6878   1
   8   9  10 458.794 49.0508   1
 -10  -9  -9 1565.35 82.9419   1
  -9  -9 -10 1711.61 87.8966   1
  -9 -10  -9 1577.15 84.7961   1
 -10  -9  -8 2689.07 111.744   1
  -9  -8 -10 2660.27 110.083   1
 -10  -9  -7 1345.05 73.6980   1
  -9  -7 -10 1211.51 68.8484   1
  -9  -6 -10 11378.1 306.625   1
  10  -9   5 545.769 22.8372   1
  -9  -5 -10 552.681 44.8909   1
  -9  -4 -10 11840.4 311.405   1
  -3 -10  -9 216.265 34.7734   1
  -9  -3 -10 224.313 29.1753   1
  10   9  -3 253.645 38.3918   1
  10   9  -2 4492.43 151.997   1
  -9  -2 -10 4295.59 133.867   1
  -2 -10  -9 4392.31 148.750   1
  10   9  -1 11581.7 317.775   1
  -9  -1 -10 11683.0 295.557   1
  -1 -10  -9 11593.5 314.691   1
  -9   0 -10 1804.35 69.1258   1
   0 -10  -9 2007.23 87.7873   1
  10   9   0 1930.70 91.5126   1
  10   9   1 11077.4 312.176   1
  -9   1 -10 11457.6 281.897   1
  -1  10  -9 11425.3 282.337   1
  -2  10  -9 4091.22 117.662   1
  10   9   2 4067.34 146.914   1
  -9   2 -10 4390.80 117.452   1
   9   3  10 321.856 34.1489   1
  -3  10  -9 285.697 20.9308   1
  -9   3 -10 237.511 19.8862   1
  10   9   3 216.666 36.8082   1
  -9   4 -10 11203.8 267.498   1
   9   4  10 11708.2 302.432   1
  10   9   4 11357.0 315.604   1
  10   9   5 489.986 48.4406   1
   9   5  10 520.480 45.0795   1
   9   6  10 11739.9 314.621   1
  10   9   6 11431.4 323.115   1
   7  10   9 1316.88 75.1472   1
  10   9   7 1197.89 73.8630   1
   9   7  10 1322.64 72.7166   1
   8  10   9 2433.03 109.714   1
  10   9   8 2621.89 112.636   1
   9   8  10 2674.61 110.715   1
   9   9  10 1764.19 89.0528   1
  10   9   9 1742.32 90.4951   1
   9  10   9 1544.59 86.1467   1
 -10 -10 -10 28920.3 716.653   1
 -10 -10  -9 192.053 43.1977   1
 -10  -9 -10 181.833 41.3613   1
  -9 -10 -10 248.599 43.7674   1
  -8 -10 -10 5077.78 178.470   1
 -10 -10  -8 5275.08 179.779   1
 -10  -7 -10 8061.50 235.696   1
 -10  -6 -10 3230.69 119.438   1
 -10  -5 -10 5238.00 165.153   1
  10 -10   5 5274.87 130.990   1
 -10  -4 -10 223.638 30.8732   1
 -10  -3 -10 4807.70 148.274   1
 -10  -2 -10 23221.9 560.547   1
  -2 -10 -10 22703.6 577.690   1
  10  10  -2 23926.6 583.879   1
  -1 -10 -10 12391.9 339.765   1
 -10  -1 -10 12892.1 321.546   1
  10  10  -1 12806.6 346.449   1
  10  10   0 26188.0 657.799   1
   0 -10 -10 27705.3 656.100   1
 -10   0 -10 26314.4 627.829   1
  10  10   1 12784.2 348.388   1
  10   1  10 12318.2 323.000   1
 -10   1 -10 13127.6 315.156   1
 -10   2 -10 23966.5 562.106   1
  10   2  10 24082.0 581.377   1
  10  10   2 24359.2 604.390   1
  10  10   3 4432.09 161.504   1
  10   3  10 4551.40 146.308   1
  -3  10 -10 4743.09 125.058   1
  10  10   4 205.688 39.0075   1
  10   4  10 198.929 31.1023   1
  10  10   5 4983.65 173.973   1
  10   5  10 5203.53 164.582   1
  10   6  10 3207.32 121.498   1
  10  10   6 3139.16 129.694   1
  10  10   7 7400.80 230.064   1
  10   7  10 7324.45 222.382   1
   8  10  10 5400.79 184.310   1
  10  10   8 5546.65 187.017   1
  10   8  10 5531.69 182.486   1
   9  10  10 255.131 43.9754   1
  10  10   9 276.150 46.8034   1
  10   9  10 245.948 43.8367   1
  10  10  10 29557.1 734.106   1
   0  11   0 4.44677 20.3766   1
   0 -11   0 9.57022 19.5433   1
   1  11   0 14.4122 21.4938   1
  -1  11   0 16.6619 18.4533   1
   1 -11   0 9.23960 19.7365   1
  -1 -11   0-2.47143 21.1165   1
   2  11   0 11736.2 312.166   1
  -2 -11   0 12101.3 313.342   1
   2 -11   0 12237.6 307.282   1
  11   0   3-4.10446 16.1605   1
  -3 -11   0 5.41339 20.2061   1
   3 -11   0 8.55205 16.6215   1
   4 -11   0 1153.12 53.2879   1
  -4 -11   0 1245.46 62.3375   1
  11   0   4 1096.20 52.1672   1
   5 -11   0 11.8305 15.0273   1
  -5 -11   0-2.99162 22.0162   1
  11   0   5-6.08792 17.0562   1
  -6 -11   0 722.909 50.1217   1
  11   0   6 666.047 40.0879   1
   6 -11   0 681.972 39.9236   1
  11   0   7-12.5591 24.0383   1
  11   0   8 18573.1 452.405   1
   9  11   0-10.9287 28.3209   1
  11   0   9 10.4657 17.8839   1
 -11   0  -9-14.9505 22.3367   1
  10  11   0 1147.37 72.6334   1
  11   0  10 1122.12 53.6445   1
 -11   0 -10 1173.68 54.0306   1
   0 -10 -11 1064.20 67.9854   1
 -11  -1 -10 1104.64 55.3504   1
  11  -1  10 1113.26 50.4509   1
  10  11  -1 1020.18 68.9419   1
  -1 -10 -11 963.062 64.2811   1
 -11  -1  -9 10239.1 270.737   1
  11  -1   9 10774.9 268.442   1
  11  -1   8 239.327 26.6875   1
 -11  -1  -8 217.674 29.5644   1
   7 -11   1 280.600 24.9797   1
  11  -1   7 296.453 28.3454   1
  -7 -11  -1 306.035 36.2922   1
  11  -1   6 37.0018 16.8869   1
  -6 -11  -1 15.8596 21.0386   1
   6 -11   1 26.8217 14.2711   1
  11  -1   5 19713.7 477.701   1
  -5 -11  -1 19770.2 497.459   1
   5 -11   1 20362.8 479.628   1
  -4 -11  -1 180.352 27.8073   1
  11  -1   4 244.840 24.6877   1
   4 -11   1 209.517 23.1035   1
  -3 -11  -1 918.140 53.3552   1
   3  11  -1 896.892 51.9200   1
   3 -11   1 893.908 45.9158   1
  -2 -11  -1 4547.88 140.938   1
   2 -11   1 4294.69 131.060   1
   2  11  -1 4316.21 138.239   1
   1 -11   1 15399.0 376.006   1
  -1  11   1 14875.3 376.085   1
  -1 -11  -1 14993.1 381.906   1
   1  11  -1 15100.8 378.165   1
   0  11  -1 54.2459 22.1020   1
   0 -11  -1 27.5442 22.8553   1
   0  11   1 30.0066 22.1352   1
   0 -11   1 36.3286 20.5310   1
  -1  11  -1 14867.6 371.055   1
   1  11   1 14433.9 377.150   1
  -1 -11   1 15269.9 378.065   1
   1 -11  -1 15614.3 379.207   1
   2 -11  -1 4283.85 135.236   1
  -2  11  -1 4479.48 129.720   1
  -2 -11   1 4411.36 138.813   1
   3 -11  -1 965.632 50.3120   1
  11   1   3 922.860 49.5948   1
  -3 -11   1 973.423 54.2581   1
  -4 -11   1 164.811 26.6146   1
   4 -11  -1 204.395 25.4647   1
  11   1   4 172.538 24.0201   1
   5 -11  -1 20525.8 496.078   1
  11   1   5 20731.5 499.042   1
  -5 -11   1 20439.7 510.790   1
  11   1   6-2.27652 19.1340   1
  11   1   7 283.176 31.7531   1
  11   1   8 300.115 32.8056   1
   8  11   1 224.135 40.4451   1
  11   1   9 10501.2 271.981   1
   9  11   1 10112.2 292.242   1
 -11   1 -10 1036.71 48.2417   1
  11   1  10 1008.93 54.4557   1
  10  11   1 993.069 68.7931   1
 -11  -2 -10 979.957 53.5966   1
  -9 -11  -2 13019.8 341.362   1
 -11  -2  -9 12942.8 320.320   1
   8 -11   2 1529.69 57.6290   1
 -11  -2  -8 1490.40 66.0091   1
  -8 -11  -2 1502.57 78.4957   1
  11  -2   8 1496.66 58.6768   1
  11  -2   7 63.7911 17.3480   1
  -7 -11  -2 87.1014 24.8875   1
   7 -11   2 78.2109 15.8341   1
  -6 -11  -2 118.065 26.8960   1
   6 -11   2 96.6626 17.7111   1
  11  -2   6 73.5014 17.6021   1
  -5 -11  -2 37.1683 22.1614   1
  11  -2   5 55.9938 17.2503   1
   5 -11   2 71.3117 16.7178   1
  11  -2   4 711.966 38.1664   1
  -4 -11  -2 691.707 47.6529   1
   4 -11   2 788.185 40.1834   1
   4  11  -2 710.542 47.5620   1
   3  11  -2 13936.2 359.086   1
   3 -11   2 14103.2 347.798   1
  -3 -11  -2 14244.1 364.329   1
   2 -11   2 133.344 22.1971   1
   2  11  -2 200.720 29.0709   1
   1 -11   2 4910.66 143.039   1
  -1 -11  -2 4857.23 151.951   1
   1  11  -2 4883.50 147.056   1
   0 -11   2 17.4863 21.0410   1
   0  11  -2 21.1425 20.2662   1
   0  11   2-9.69205 21.2560   1
   0 -11  -2 62.6266 24.0299   1
  -1  11  -2 4921.28 140.938   1
   1 -11  -2 4806.89 149.098   1
  -1 -11   2 4852.63 146.469   1
   2 -11  -2 165.587 26.6974   1
  -2  11  -2 171.807 20.7545   1
  -2 -11   2 140.635 27.0430   1
  11   2   2 211.712 28.6134   1
  11   2   3 13849.1 356.368   1
   3 -11  -2 14167.3 355.432   1
  -3 -11   2 14382.4 361.261   1
   4 -11  -2 826.936 46.6582   1
  11   2   4 816.671 47.3020   1
  11   2   5 48.6971 21.3758   1
   5 -11  -2 38.4255 16.9002   1
  11   2   6 102.289 24.5203   1
   7  11   2 31.1115 28.7487   1
  11   2   7 58.6328 23.8179   1
  11   2   8 1507.71 69.6220   1
   8  11   2 1590.37 83.2663   1
  11   2   9 13182.7 338.224   1
   9  11   2 13001.2 357.489   1
  10  11   2 1021.86 70.0553   1
  11   2  10 1010.45 56.7411   1
 -10 -11  -3 41.5721 32.2988   1
 -11  -3 -10 31.2382 22.3738   1
 -11  -3  -9 11779.2 303.831   1
  11  -3   9 11301.6 281.877   1
   9 -11   3 11951.8 284.347   1
  -9 -11  -3 11367.7 319.445   1
 -11  -3  -8 2875.02 103.507   1
  11  -3   8 2926.96 88.6435   1
   8 -11   3 3068.47 89.6936   1
  -8 -11  -3 2845.20 116.607   1
  -7 -11  -3 1211.95 69.7262   1
  11  -3   7 1340.84 51.0673   1
   7 -11   3 1287.16 50.7924   1
 -11  -3  -7 1417.52 64.0607   1
  11  -3   6 5567.26 148.210   1
  -6 -11  -3 5306.28 173.568   1
   6 -11   3 5603.87 149.748   1
  -3  -5 -11 11554.6 304.829   1
   5 -11   3 11741.4 288.319   1
   5  11  -3 11374.9 308.588   1
  11  -3   5 11684.6 286.373   1
  -5 -11  -3 11928.4 315.168   1
  -4 -11  -3 2841.27 106.434   1
   4  11  -3 2889.05 103.031   1
   4 -11   3 2691.01 87.7122   1
   3  11  -3 1414.68 65.2143   1
   3 -11   3 1447.20 57.1662   1
  -3 -11  -3 1302.18 67.0453   1
   2  11  -3 10042.5 262.870   1
  -2 -11  -3 10073.9 271.760   1
   2 -11   3 9777.22 253.744   1
  -1 -11  -3 1316.10 65.4770   1
   1 -11   3 1349.51 57.3753   1
   1  11  -3 1337.40 60.5684   1
   0 -11  -3 27.1952 18.9898   1
   0 -11   3 57.3988 19.8608   1
   0  11  -3 28.7469 20.3562   1
  -1 -11   3 1361.21 61.7285   1
   1 -11  -3 1467.15 66.9601   1
  -1  11  -3 1289.40 56.3878   1
  11   3   2 9897.26 261.844   1
  -2  11  -3 9688.18 246.508   1
   2 -11  -3 9519.20 258.882   1
  -3  11  -3 1431.66 56.3012   1
   3 -11  -3 1562.69 68.7195   1
  11   3   3 1590.81 69.7606   1
  11   3   4 2747.57 102.119   1
   4 -11  -3 2990.61 102.200   1
  11   3   5 11826.0 309.538   1
  11   3   6 5750.85 171.195   1
   6  11   3 5540.84 179.297   1
  11   3   7 1201.11 62.9695   1
   7  11   3 1251.80 72.2477   1
  11   3   8 3067.03 110.893   1
   8  11   3 3008.72 121.174   1
   9  11   3 11723.2 316.305   1
  11   3   9 10707.2 294.955   1
  10  11   3-8.08344 36.8776   1
  11   3  10 74.0853 26.8508   1
  10 -11   4 6788.68 170.948   1
 -11  -4 -10 6551.68 196.205   1
  -9 -11  -4 696.940 57.3231   1
 -11  -4  -9 835.277 51.6213   1
   9 -11   4 821.488 35.5242   1
   8 -11   4 26328.3 615.360   1
  -8 -11  -4 26546.6 656.465   1
 -11  -4  -8 26859.2 642.385   1
  11  -4   8 26783.5 612.942   1
  11  -4   7 565.111 29.1711   1
 -11  -4  -7 491.852 40.3067   1
   7 -11   4 555.822 29.8370   1
  -7 -11  -4 528.291 49.0198   1
   6 -11   4 27968.8 640.796   1
   6  11  -4 26783.5 669.275   1
  -4  -6 -11 27734.8 667.299   1
  11  -4   6 27821.1 638.968   1
  -6 -11  -4 27293.8 675.708   1
   5  11  -4 1303.92 66.4455   1
  11  -4   5 1402.14 51.1389   1
  -5 -11  -4 1328.65 71.8047   1
  -4  -5 -11 1438.39 66.4904   1
   5 -11   4 1379.66 51.8102   1
  -4 -11  -4 570.253 46.6787   1
   4 -11   4 652.961 33.8809   1
  -4  -4 -11 565.634 39.3923   1
   4  11  -4 567.498 42.5794   1
  -3 -11  -4 6779.37 204.238   1
   3  11  -4 6925.19 196.133   1
   3 -11   4 7197.44 183.431   1
  -4  -3 -11 6711.02 191.185   1
  -2 -11  -4 4303.16 144.948   1
   2 -11   4 4615.25 129.570   1
   2  11  -4 4421.49 136.671   1
  -1 -11  -4 8684.85 244.324   1
   1 -11   4 9131.82 229.460   1
   1  11  -4 8410.72 231.630   1
   0  11  -4 25.9550 18.9700   1
   0 -11  -4-8.44569 20.2639   1
  -1  11  -4 8397.39 220.124   1
   1 -11  -4 8523.54 234.285   1
  11   4   1 8347.84 234.297   1
   2 -11  -4 4459.81 141.385   1
  -2  11  -4 4575.80 128.414   1
  11   4   2 4325.00 142.721   1
   3 -11  -4 7164.19 199.022   1
  -3  11  -4 6711.29 180.060   1
  11   4   3 7126.23 202.125   1
  11   4   4 597.915 45.1035   1
  11   4   5 1333.99 67.4835   1
   5  11   4 1376.50 72.3510   1
  11   4   6 28041.3 660.311   1
   6  11   4 26253.0 667.560   1
  11   4   7 561.753 45.5611   1
   7  11   4 471.377 49.2503   1
   8  11   4 26087.6 658.887   1
  11   4   8 26938.1 647.404   1
  11   4   9 802.143 55.3421   1
   9  11   4 813.237 63.7719   1
  10  11   4 6622.84 216.568   1
  11   4  10 6954.27 202.979   1
 -11  -5 -10 257.183 35.7642   1
  10 -11   5 305.391 20.0356   1
   9 -11   5 944.403 36.2376   1
 -11  -5  -9 1024.06 59.6364   1
 -11  -5  -8 2806.27 105.825   1
  11  -5   8 2762.51 74.7136   1
   8 -11   5 2761.96 77.8474   1
  -8 -11  -5 2631.95 111.445   1
  -7 -11  -5 7786.80 236.314   1
   7 -11   5 8254.46 197.929   1
 -11  -5  -7 8074.05 228.242   1
   7  11  -5 7823.23 231.723   1
  -5  -7 -11 8307.80 234.126   1
  11  -5   7 7947.29 195.934   1
  -5  -6 -11 330.832 34.9508   1
  11  -5   6 312.529 20.7129   1
  -6 -11  -5 322.023 40.4145   1
   6 -11   5 359.660 22.0159   1
   6  11  -5 313.519 38.1606   1
  -5 -11  -5 2089.91 92.7100   1
  -5  -5 -11 1995.35 83.0239   1
   5 -11   5 2118.47 66.2292   1
   5  11  -5 1936.24 84.9068   1
  -4 -11  -5 2543.79 102.449   1
   4 -11   5 2464.57 77.5318   1
   4  11  -5 2522.64 95.1941   1
  -5  -4 -11 2479.45 92.5640   1
  -5  -3 -11 2138.90 79.6992   1
   3  11  -5 1908.63 79.5324   1
  -3 -11  -5 2018.86 89.2895   1
   2  11  -5 258.405 29.3009   1
  -2 -11  -5 233.513 33.1826   1
  -5  -2 -11 303.899 28.6695   1
  -1 -11  -5 1245.25 64.9994   1
  -5  -1 -11 1196.57 53.7153   1
   1  11  -5 1181.52 56.0005   1
  11   5   0-2.93062 22.9325   1
   0  11  -5 1.94688 16.3658   1
   0 -11  -5 34.8540 23.4452   1
  -5   0 -11 22.4818 16.2172   1
  -1  11  -5 1185.15 51.4807   1
   1 -11  -5 1097.77 60.2849   1
  11   5   1 1142.98 62.3766   1
  11   5   2 239.440 32.1422   1
  -2  11  -5 252.022 24.0471   1
   2 -11  -5 228.670 31.7226   1
  11   5   3 1953.18 84.4941   1
  -3  11  -5 2004.15 66.2895   1
   3 -11  -5 1872.45 80.4223   1
  11   5   4 2574.80 101.042   1
  -4  11  -5 2633.85 78.3793   1
   4  11   5 2562.73 102.787   1
   5  11   5 1818.87 87.0228   1
  11   5   5 2081.37 88.4740   1
   6  11   5 304.468 37.7316   1
  11   5   6 259.649 36.6770   1
  11   5   7 8199.48 234.870   1
   7  11   5 8004.34 240.477   1
   8  11   5 2862.81 117.677   1
  11   5   8 2813.70 111.460   1
  11   5   9 933.050 61.0426   1
   9  11   5 937.550 67.4706   1
  11   5  10 251.290 37.4780   1
  10  11   5 335.512 46.3948   1
 -11  -6 -10 2563.88 104.015   1
  -6  -9 -11 12187.4 337.469   1
 -11  -6  -9 12441.3 331.289   1
   8  11  -6 5528.84 178.842   1
  -6  -8 -11 5511.57 178.244   1
 -11  -6  -8 5653.48 175.148   1
  -7 -11  -6 522.676 50.9007   1
  11  -6   7 558.643 22.5152   1
   7  11  -6 512.760 45.6956   1
 -11  -6  -7 593.666 46.9477   1
  -6  -7 -11 572.450 48.9282   1
   6  11  -6 19558.2 506.539   1
  -6  -6 -11 20831.9 509.396   1
 -11  -6  -6 19831.9 506.433   1
  11  -6   6 20702.2 469.847   1
  -6 -11  -6 20211.2 516.524   1
  -6  -5 -11 1136.98 61.4626   1
   5  11  -6 1290.61 64.9186   1
  -5 -11  -6 1158.21 68.4924   1
  -6  -4 -11-2.58219 20.0761   1
   4  11  -6-5.28672 26.1845   1
  -4 -11  -6-30.1942 31.4569   1
  -6  -3 -11 9831.11 258.904   1
  -3 -11  -6 9663.21 272.989   1
   3  11  -6 9769.71 260.606   1
  -6  -2 -11 9951.60 257.257   1
   2  11  -6 9819.93 258.524   1
  -2 -11  -6 9685.81 272.506   1
  -1 -11  -6 19847.4 503.438   1
  -6  -1 -11 19891.5 484.101   1
   1  11  -6 20619.4 487.130   1
   0 -11  -6-11.9873 22.3727   1
   0  11  -6-13.2872 19.5407   1
  11   6   0-24.8680 26.1275   1
  -6   0 -11 3.51437 15.2547   1
  -6   1 -11 21153.7 484.923   1
   1 -11  -6 19837.0 506.471   1
  -1  11  -6 20043.8 486.717   1
  11   6   1 20471.3 511.304   1
  -6   2 -11 9907.45 243.674   1
  11   6   2 9957.20 273.128   1
  -2  11  -6 9530.67 246.415   1
   2 -11  -6 10009.3 268.580   1
  11   6   3 10304.2 277.949   1
  -3  11  -6 9811.04 247.288   1
  -6   3 -11 10081.2 244.734   1
  -6   4 -11-1.01655 10.5798   1
  -4  11  -6-3.41251 10.4731   1
   4  11   6 39.5458 24.9455   1
  11   6   4-3.20491 27.5291   1
  11   6   5 1125.01 66.7294   1
  -6   5 -11 1224.33 40.7040   1
   5  11   6 1220.08 68.5785   1
  -6   6 -11 19885.3 458.525   1
  11   6   6 20484.2 506.195   1
   6  11   6 20156.2 509.099   1
   7  11   6 626.042 51.9312   1
  11   6   7 535.991 48.0218   1
  11   6   8 5713.50 184.525   1
   8  11   6 5972.44 192.401   1
   9  11   6 13646.2 365.451   1
  11   6   9 12766.8 351.536   1
  10  11   6 2496.44 114.060   1
  11   6  10 2613.91 108.175   1
 -11  -7 -10 1227.78 71.0029   1
  -7 -10 -11 1239.55 75.2644   1
  -7  -9 -11 3536.22 135.162   1
 -11  -7  -9 3613.25 131.324   1
  -7  -8 -11 1299.06 73.7665   1
 -11  -7  -8 1192.63 67.2426   1
  -7  -7 -11 2662.09 108.747   1
 -11  -7  -7 2904.29 110.619   1
  -6 -11  -7 2270.80 101.021   1
  -7  -6 -11 2203.91 93.9445   1
  11  -7   6 2297.14 61.8207   1
 -11  -7  -6 2186.92 95.1488   1
 -11  -7  -5 1640.48 80.3797   1
   5  11  -7 1747.13 78.6835   1
  -7  -5 -11 1927.54 81.8558   1
  -5 -11  -7 1738.22 86.5759   1
  -4 -11  -7 306.447 43.1477   1
   4  11  -7 256.781 32.6844   1
  -7  -4 -11 242.655 32.5744   1
  -3 -11  -7 6851.63 202.381   1
  -7  -3 -11 6342.43 185.363   1
   3  11  -7 6388.91 185.716   1
  -2 -11  -7 4776.33 160.704   1
   2  11  -7 4958.82 147.608   1
  -7  -2 -11 4968.58 147.012   1
  11   7  -1 1230.62 70.0469   1
  -7  -1 -11 1382.35 59.4835   1
  -1 -11  -7 1289.90 70.7252   1
   1  11  -7 1243.39 58.2278   1
  11   7   0 32.8684 27.4754   1
  -7   0 -11 9.19222 19.0696   1
   0  11  -7 22.7714 19.7548   1
   0 -11  -7 24.9884 28.0889   1
  -1  11  -7 1281.99 54.3551   1
  -7   1 -11 1378.66 54.6788   1
   1 -11  -7 1326.20 70.0633   1
  11   7   1 1244.45 69.9382   1
   2 -11  -7 4810.14 155.672   1
  -7   2 -11 5014.88 132.551   1
  11   7   2 4746.63 158.924   1
  -2  11  -7 4580.38 132.811   1
  -3  11  -7 6335.41 168.242   1
  -7   3 -11 6542.86 166.676   1
  11   7   3 6875.77 202.342   1
  -4  11  -7 259.185 19.8000   1
  -7   4 -11 318.039 20.1519   1
  11   7   4 367.841 40.7140   1
  -7   5 -11 1876.82 55.4419   1
   5  11   7 2034.26 92.2905   1
  11   7   5 1801.74 88.4077   1
   6  11   7 2264.39 100.549   1
  11   7   6 2310.60 99.9938   1
  -7   6 -11 2309.64 60.7050   1
   7  11   7 2637.73 112.963   1
  11   7   7 2830.45 113.141   1
   8  11   7 1269.07 75.5544   1
  11   7   8 1269.85 73.8503   1
   9  11   7 3519.46 139.216   1
  11   7   9 3774.40 137.660   1
  10  11   7 977.180 71.6880   1
  11   7  10 1052.10 68.4153   1
  -8 -10 -11 76.1166 36.5817   1
 -11  -8 -10 76.8809 34.2148   1
 -11  -8  -9 10678.2 296.218   1
  -8  -9 -11 10381.7 298.299   1
 -11  -8  -8 228.155 37.0679   1
  -8  -8 -11 178.048 34.4186   1
  -8  -7 -11 3391.68 125.534   1
 -11  -8  -7 3384.00 126.549   1
  -8  -6 -11 773.492 54.3262   1
 -11  -8  -6 768.958 55.8296   1
  -5 -11  -8 5741.98 189.429   1
  -8  -5 -11 6195.83 182.969   1
  -4 -11  -8 608.608 52.3896   1
  -8  -4 -11 624.307 45.8046   1
  -8  -3 -11 24383.5 585.145   1
  -3 -11  -8 23943.9 601.379   1
   2  11  -8 542.029 40.2990   1
  11   8  -2 424.944 47.6231   1
  -2 -11  -8 422.573 45.1281   1
  -8  -2 -11 489.730 37.8504   1
  11   8  -1 30758.5 760.894   1
  -1 -11  -8 31672.9 759.168   1
  -8  -1 -11 31480.2 737.941   1
   1  11  -8 31480.7 738.589   1
   0 -11  -8-16.2194 28.5980   1
  -8   0 -11 20.6056 21.2570   1
  11   8   0 58.5455 31.2670   1
   0  11  -8 22.8551 22.5792   1
  11   8   1 31880.6 778.192   1
  -1  11  -8 32310.1 747.579   1
   1 -11  -8 31224.4 772.498   1
  -8   1 -11 32476.8 746.402   1
  -8   2 -11 549.123 32.0564   1
  -2  11  -8 490.854 32.4366   1
  11   8   2 512.239 48.7389   1
  -3  11  -8 24234.9 564.369   1
  11   8   3 23804.6 602.191   1
  -8   3 -11 24386.0 562.624   1
  -8   4 -11 755.085 31.5994   1
  11   8   4 702.695 55.5411   1
  -8   5 -11 6050.57 147.233   1
  11   8   5 6092.50 194.364   1
  11   8   6 924.995 62.9864   1
   6  11   8 803.730 60.2216   1
  11   8   7 3749.19 138.295   1
   7  11   8 3441.22 135.409   1
  11   8   8 211.161 38.3727   1
   8  11   8 192.548 37.0358   1
  11   8   9 10901.0 304.960   1
   9  11   8 10432.7 306.394   1
  11   8  10 83.3732 33.1977   1
  10  11   8 4.30751 35.8134   1
 -11  -9 -10 391.217 46.9330   1
 -10 -11  -9 364.294 50.5928   1
  -9 -10 -11 377.384 48.5680   1
 -11  -9  -9 10492.0 298.300   1
  -9  -9 -11 10441.2 298.326   1
 -11  -9  -8 342.742 44.4875   1
  -9  -8 -11 362.774 45.1091   1
  -9  -7 -11 229.136 36.6120   1
 -11  -9  -7 243.102 38.1396   1
 -11  -9  -6 54.6048 27.6079   1
  -9  -6 -11 102.649 30.7870   1
  -9  -5 -11 8575.53 242.017   1
  -9  -4 -11 208.708 30.3723   1
  -4 -11  -9 77.7055 32.1201   1
  -3 -11  -9 968.310 64.0632   1
  11   9  -3 940.127 63.4373   1
  -9  -3 -11 937.772 54.1095   1
  -9  -2 -11 2853.01 100.242   1
  -2 -11  -9 2739.47 112.657   1
  11   9  -2 2683.58 113.681   1
   1  11  -9 29867.0 697.421   1
  11   9  -1 28616.6 721.865   1
  -9  -1 -11 29607.6 697.533   1
  -1 -11  -9 29734.2 720.533   1
  11   9   0 80.1738 39.1494   1
   0  11  -9 28.9671 24.3831   1
  -9   0 -11 13.4267 22.7427   1
   0 -11  -9 6.74164 30.4605   1
   1 -11  -9 30677.3 721.845   1
  -9   1 -11 29988.1 691.047   1
  -1  11  -9 28490.7 690.576   1
  11   9   1 29888.2 725.701   1
  -2  11  -9 2816.63 87.6931   1
  -9   2 -11 2715.48 85.6405   1
  11   9   2 2942.84 117.294   1
  -3  11  -9 972.330 41.0841   1
  11   9   3 959.605 64.9817   1
  -9   3 -11 933.388 39.0918   1
  11   9   4 142.492 35.8281   1
  -9   4 -11 177.828 15.8518   1
  11   9   5 8137.60 246.326   1
  11   9   6 56.0742 34.7907   1
  11   9   7 308.962 44.6816   1
   7  11   9 247.211 40.8951   1
   8  11   9 351.344 47.5603   1
  11   9   8 349.702 47.6078   1
   9  11   9 10111.1 297.363   1
  11   9   9 10370.8 297.688   1
  11   9  10 448.042 54.3962   1
  10  11   9 557.309 57.8221   1
 -10 -10 -11 32.8290 33.9239   1
 -11 -10 -10 77.6553 36.0408   1
 -10 -11 -10 21.0969 32.8158   1
 -10  -9 -11 1434.90 81.9886   1
 -11 -10  -9 1354.70 82.0547   1
  -9 -11 -10 1391.41 82.8328   1
 -10  -8 -11 1184.11 71.3812   1
 -11 -10  -8 992.590 68.5578   1
 -11 -10  -7 3587.94 139.818   1
 -10  -7 -11 4007.46 139.873   1
 -10  -6 -11 1698.51 82.2264   1
  11 -10   5 5658.35 142.115   1
 -10  -5 -11 5891.81 177.923   1
 -10  -4 -11 1207.95 64.1185   1
  11  10  -3 2248.45 102.041   1
  -3 -11 -10 2017.49 98.2154   1
 -10  -2 -11 2608.98 94.1738   1
  -2 -11 -10 2637.82 109.626   1
  11  10  -2 2404.08 107.966   1
 -10  -1 -11 11286.0 298.105   1
  11  10  -1 11850.0 326.033   1
  -1 -11 -10 12240.9 323.531   1
   0 -11 -10 24.5283 28.7901   1
  11  10   0 22.9216 32.1097   1
 -10   0 -11-3.89727 20.8613   1
 -10   1 -11 11670.5 292.700   1
  11  10   1 11642.8 328.403   1
   1 -11 -10 11908.5 323.525   1
  -1  11 -10 11855.8 294.172   1
  -2  11 -10 2698.25 84.0776   1
  11  10   2 2623.50 114.647   1
 -10   2 -11 2497.00 81.7902   1
 -10   3 -11 2437.38 74.3565   1
  11  10   3 2479.19 111.032   1
  -3  11 -10 2404.65 75.8989   1
  11  10   4 1177.46 75.9652   1
  10   5  11 5783.77 181.611   1
  11  10   5 5869.11 195.232   1
  10   6  11 1409.83 76.8757   1
  11  10   6 1386.46 83.5223   1
  11  10   7 3915.90 150.236   1
  10   7  11 3820.15 141.783   1
  11  10   8 1099.58 74.5636   1
  10   8  11 1020.23 68.6684   1
   8  11  10 1053.46 73.0356   1
   9  11  10 1458.23 86.6882   1
  10   9  11 1415.34 82.4977   1
  11  10   9 1423.75 85.1556   1
  11  10  10 83.5814 38.8057   1
  10  10  11 91.1712 39.4407   1
  10  11  10 26.6721 37.1834   1
 -11 -11 -11 6379.89 211.785   1
 -11 -11 -10 85.9501 37.7226   1
 -10 -11 -11 77.6596 36.2948   1
 -11 -10 -11 45.8637 35.0773   1
 -11  -9 -11 9217.37 269.929   1
 -11 -11  -9 9041.83 272.553   1
  -9 -11 -11 9126.61 275.037   1
  -8 -11 -11 13353.2 368.708   1
 -11  -8 -11 13661.0 362.441   1
 -11 -11  -8 12839.5 366.219   1
 -11  -7 -11 543.938 50.2653   1
 -11  -6 -11 8154.06 236.889   1
 -11  -5 -11 3221.81 119.463   1
  11 -11   5 3216.41 87.6700   1
 -11  -4 -11 2955.12 109.754   1
 -11  -3 -11 213.865 31.9566   1
 -11  -2 -11 27537.3 660.513   1
  11  11  -2 27725.2 686.102   1
  11  11  -1 6040.51 198.024   1
  -1 -11 -11 5996.16 192.673   1
 -11  -1 -11 6034.93 173.114   1
 -11   0 -11 4.00434 19.4315   1
  11  11   0-12.0618 33.4153   1
   0 -11 -11-7.32319 29.0154   1
 -11   1 -11 5995.40 163.884   1
  11  11   1 5847.28 196.574   1
 -11   2 -11 27777.9 652.240   1
  -2  11 -11 28315.7 653.730   1
  11   2  11 27749.0 672.679   1
  11  11   2 28113.2 698.857   1
  -3  11 -11 192.847 20.6147   1
  11   3  11 229.682 31.8837   1
  11  11   3 231.094 42.8561   1
  11  11   4 3083.96 128.450   1
  11   4  11 3080.16 114.927   1
  11  11   5 3436.47 139.173   1
  11   5  11 3282.06 123.840   1
  11   6  11 8018.75 237.432   1
  11  11   6 7889.02 249.258   1
  11  11   7 451.983 56.6412   1
  11   7  11 491.893 51.8733   1
  11  11   8 13492.1 380.823   1
  11   8  11 13902.8 375.193   1
  11  11   9 9012.29 274.712   1
  11   9  11 9019.27 270.520   1
  10  11  11 59.4268 38.6666   1
  11  11  10 83.0050 40.6808   1
  11  10  11 71.4828 36.5267   1
  11  11  11 5849.92 202.259   1
   0  12   0 20226.0 494.715   1
   0 -12   0 20178.2 496.615   1
  -1  12   0 38.7113 19.9860   1
   1 -12   0 22.6406 21.1572   1
  -1 -12   0 51.1565 23.9849   1
   1  12   0 25.8257 22.4310   1
  -2 -12   0 4271.56 140.715   1
   2  12   0 4276.38 140.038   1
   2 -12   0 4470.40 136.538   1
   3 -12   0 9.45994 18.0244   1
   3  12   0-26.3778 26.4805   1
  -3 -12   0 2.91998 21.3329   1
  -4 -12   0 20111.5 502.987   1
   4 -12   0 20150.3 489.942   1
  12   0   4 20143.8 489.513   1
   5 -12   0 10.9830 18.1522   1
  12   0   5 6.66751 18.2604   1
  -5 -12   0-9.60042 27.0461   1
   6 -12   0 21566.7 520.408   1
  -6 -12   0 21443.8 540.581   1
  12   0   6 21773.9 522.233   1
   7 -12   0-14.7377 20.3489   1
  12   0   7-2.27185 21.8652   1
  12   0   8 29.9721 18.7328   1
  12   0   9 13.7357 18.1434   1
  12   0  10 894.190 48.1017   1
  10  12   0 834.096 64.3360   1
  11  12   0-12.6315 34.3918   1
   0 -11 -12-22.8526 28.6327   1
 -12   0 -11-4.18186 18.1505   1
  12   0  11 13.9199 17.6813   1
 -12  -1 -11 849.697 49.0411   1
  11  12  -1 816.497 63.7781   1
  12  -1  10 6598.12 181.625   1
 -12  -1 -10 6619.85 185.875   1
  12  -1   9 8.11517 16.1778   1
  12  -1   8 284.588 28.9736   1
  -8 -12  -1 283.769 39.6925   1
   8 -12   1 353.240 28.8466   1
  -7 -12  -1 2556.58 107.294   1
  12  -1   7 2701.72 93.3982   1
   7 -12   1 2853.36 92.5100   1
  12  -1   6 188.696 24.4697   1
   6 -12   1 211.290 25.8601   1
  -6 -12  -1 213.302 33.7056   1
  -5 -12  -1 1578.83 78.5900   1
  12  -1   5 1752.40 68.3320   1
   5 -12   1 1747.60 69.0455   1
  12  -1   4 2975.27 98.4278   1
   4  12  -1 3080.43 112.137   1
   4 -12   1 2874.09 98.6751   1
  -4 -12  -1 2907.53 110.842   1
   3  12  -1 22.6975 21.3673   1
  -3 -12  -1 89.7087 25.4432   1
   3 -12   1 71.0991 20.9642   1
   2  12  -1 1796.32 78.2344   1
   2 -12   1 1716.05 71.5692   1
  -2 -12  -1 1784.87 79.1379   1
   1  12  -1-10.0871 20.1096   1
   1 -12   1 28.6746 19.9742   1
  -1 -12  -1 22.4820 23.3578   1
   0  12  -1 665.634 43.9755   1
   0 -12   1 547.031 41.7732   1
   0 -12  -1 628.107 44.7405   1
   0  12   1 691.246 45.5401   1
  -1 -12   1 18.2504 21.4281   1
  -1  12  -1 35.0455 19.8925   1
   1 -12  -1 21.0053 22.5605   1
   1  12   1 23.7651 22.0772   1
   2 -12  -1 1916.46 78.6328   1
   2  12   1 1863.43 81.0329   1
  -2 -12   1 1922.84 80.6298   1
  -2  12  -1 1751.73 70.7810   1
  12   1   3 51.0336 21.1173   1
   3 -12  -1 27.1420 19.6981   1
  -3 -12   1 57.4294 24.1538   1
  12   1   4 3177.74 106.321   1
  -4 -12   1 3069.06 112.333   1
   4 -12  -1 2910.25 102.888   1
  12   1   5 1667.94 71.4124   1
  -5 -12   1 1791.71 81.7532   1
   5 -12  -1 1753.03 71.8847   1
   6 -12  -1 190.991 27.1647   1
  12   1   6 165.016 25.8445   1
  12   1   7 2713.13 98.0839   1
  12   1   8 274.264 31.7692   1
  12   1   9 37.9857 20.4484   1
   9  12   1 3.93210 30.7725   1
  10  12   1 6889.86 220.145   1
  12   1  10 6968.65 196.749   1
 -12   1 -11 802.199 44.1928   1
  12   1  11 915.759 52.3783   1
 -12  -2 -11 692.269 46.6515   1
  12  -2  10 3215.32 98.8379   1
 -12  -2 -10 3099.57 109.298   1
 -12  -2  -9 2.41047 25.5419   1
  -9 -12  -2 19.0778 29.0832   1
  12  -2   9 17.5938 16.2056   1
   9 -12   2 34.9583 14.5344   1
   8 -12   2 1850.74 67.2972   1
  12  -2   8 1692.62 66.7383   1
  -8 -12  -2 1922.36 89.6713   1
   7 -12   2 571.782 34.5368   1
  12  -2   7 521.479 34.2170   1
  -7 -12  -2 456.209 46.9325   1
  12  -2   6 10877.3 278.246   1
   6 -12   2 11161.5 279.577   1
  -6 -12  -2 11114.8 303.656   1
   5 -12   2 1778.56 68.4780   1
  -5 -12  -2 1672.26 82.0416   1
  12  -2   5 1812.58 67.4146   1
   5  12  -2 1730.18 80.7606   1
   4  12  -2 11385.8 303.191   1
   4 -12   2 11311.6 287.266   1
  -4 -12  -2 11234.7 306.040   1
  12  -2   4 11234.2 284.765   1
  -3 -12  -2 721.053 53.2628   1
   3  12  -2 752.680 49.9686   1
   3 -12   2 698.565 42.3307   1
   2 -12   2 1309.74 59.5252   1
   2  12  -2 1252.00 64.1876   1
   1 -12   2 275.771 29.4308   1
  -1 -12  -2 294.368 35.0418   1
   1  12  -2 223.268 31.7077   1
   0 -12   2 12178.5 307.289   1
   0  12   2 11555.0 309.876   1
   0  12  -2 12039.2 305.453   1
   0 -12  -2 11592.3 312.705   1
   1  12   2 299.642 35.0573   1
   1 -12  -2 218.268 31.9948   1
  -1 -12   2 286.550 32.1624   1
  -1  12  -2 263.820 29.0894   1
  -2 -12   2 1365.51 66.4034   1
  -2  12  -2 1395.69 58.9825   1
   2 -12  -2 1330.56 65.7123   1
  12   2   2 1422.80 66.3097   1
  12   2   3 661.059 46.4707   1
  -3 -12   2 705.089 48.1723   1
   3 -12  -2 772.200 47.8037   1
  12   2   4 11085.2 300.020   1
   4 -12  -2 11881.5 300.619   1
   5 -12  -2 1795.68 74.3102   1
  12   2   5 1749.56 75.7961   1
  12   2   6 10749.9 290.869   1
   6 -12  -2 11230.3 287.804   1
  12   2   7 517.064 42.0991   1
  12   2   8 1837.57 79.9598   1
   8  12   2 1850.82 91.0416   1
   9  12   2 44.2414 34.1824   1
  12   2   9 16.6034 22.2079   1
  12   2  10 3243.16 115.345   1
  10  12   2 3301.69 133.359   1
  12   2  11 554.217 44.3433   1
  11  12   2 612.159 57.8393   1
 -12  -3 -11 999.634 57.1078   1
 -10 -12  -3 8637.83 259.257   1
  10 -12   3 8929.36 222.052   1
 -12  -3 -10 8373.52 238.751   1
 -12  -3  -9 3143.25 114.363   1
  -9 -12  -3 3349.53 132.613   1
   9 -12   3 3538.80 102.201   1
  12  -3   9 3411.93 100.682   1
  12  -3   8 715.258 37.1238   1
   8 -12   3 676.172 36.8968   1
 -12  -3  -8 708.067 46.0180   1
  -8 -12  -3 662.459 54.7621   1
   7 -12   3 18926.8 448.842   1
  12  -3   7 18410.6 447.493   1
  -7 -12  -3 19246.9 482.651   1
  12  -3   6 359.358 27.9721   1
   6 -12   3 356.788 28.0609   1
  -6 -12  -3 356.806 40.8202   1
  -3  -6 -12 336.103 37.1901   1
   6  12  -3 354.626 41.4812   1
  -5 -12  -3 232.945 35.6491   1
  12  -3   5 255.818 24.2870   1
  -3  -5 -12 273.223 32.5827   1
   5  12  -3 208.487 32.9840   1
   5 -12   3 208.312 23.7132   1
   4  12  -3 8650.89 240.550   1
  -4 -12  -3 8376.60 244.987   1
   4 -12   3 8676.93 224.158   1
   3 -12   3 2881.72 94.8591   1
  -3 -12  -3 2761.76 109.351   1
   3  12  -3 2888.02 105.221   1
   2  12  -3 11014.1 284.982   1
  -2 -12  -3 10265.7 290.833   1
   2 -12   3 10880.3 276.277   1
   1 -12   3 291.263 29.7660   1
  -1 -12  -3 273.933 33.4687   1
   1  12  -3 273.196 31.7523   1
   0 -12  -3 3389.97 120.317   1
   0  12  -3 3302.70 111.494   1
   0 -12   3 3474.77 112.978   1
   1 -12  -3 264.762 32.8236   1
  -1  12  -3 232.529 27.8393   1
  -1 -12   3 298.501 32.1318   1
  12   3   2 10811.2 287.883   1
  -2  12  -3 10501.1 272.441   1
   2 -12  -3 11047.4 288.343   1
   3 -12  -3 2921.19 105.944   1
  12   3   3 3055.05 109.073   1
  -3  12  -3 2912.73 94.0418   1
   4 -12  -3 8157.86 231.133   1
  12   3   4 8715.47 236.043   1
  12   3   5 242.562 32.6238   1
   5 -12  -3 231.114 30.3693   1
  12   3   6 377.930 38.4981   1
  12   3   7 18734.2 466.040   1
   7  12   3 18292.2 478.861   1
  12   3   8 741.383 51.0594   1
   8  12   3 689.331 58.5139   1
   9  12   3 3325.17 132.485   1
  12   3   9 3265.56 118.682   1
  12   3  10 8800.00 248.226   1
  10  12   3 8942.62 267.645   1
  -3  11 -12 989.288 43.4700   1
  11  12   3 827.547 67.3744   1
  12   3  11 964.566 58.0338   1
  11 -12   4 1533.00 54.5704   1
 -12  -4 -11 1412.35 71.5163   1
 -12  -4 -10 406.420 40.1780   1
  10 -12   4 420.493 26.3015   1
 -12  -4  -9 128.509 27.7506   1
   9 -12   4 130.830 17.9151   1
  -9 -12  -4 164.646 35.0232   1
  12  -4   9 121.667 15.9383   1
  12  -4   8 1429.76 52.6746   1
  -8 -12  -4 1498.78 81.1791   1
  -4  -8 -12 1347.89 73.0439   1
   8 -12   4 1482.35 54.1548   1
 -12  -4  -8 1495.62 70.9136   1
   7  12  -4 690.776 52.9762   1
  -7 -12  -4 570.411 51.1981   1
   7 -12   4 546.601 32.7679   1
  12  -4   7 608.960 33.6836   1
  -4  -7 -12 629.581 50.0181   1
  -6 -12  -4 804.413 58.4912   1
  12  -4   6 856.958 40.2084   1
  -4  -6 -12 917.255 56.2880   1
   6 -12   4 922.093 41.7840   1
   6  12  -4 822.140 56.7077   1
  -5 -12  -4 107.087 29.5804   1
  12  -4   5 78.6562 17.4823   1
   5  12  -4 83.7657 29.2221   1
   5 -12   4 86.4242 17.7637   1
  -4  -5 -12 107.459 26.9252   1
  -4 -12  -4 33.8559 26.3281   1
   4  12  -4 28.2096 23.3202   1
  -4  -4 -12 30.8859 20.4057   1
   4 -12   4 25.6585 16.4749   1
  -3 -12  -4 1308.48 71.0355   1
  -4  -3 -12 1220.91 58.8875   1
   3  12  -4 1130.25 61.0637   1
   3 -12   4 1197.56 53.4045   1
   2 -12   4 1984.98 73.5714   1
  -2 -12  -4 1887.36 87.2121   1
   2  12  -4 1911.47 79.7344   1
   1 -12   4 253.149 27.5395   1
   1  12  -4 241.310 30.9537   1
  -1 -12  -4 269.298 36.0802   1
   0  12  -4 642.619 41.2049   1
   0 -12  -4 712.966 50.9739   1
  -1  12  -4 263.231 27.0737   1
  12   4   1 266.392 34.2954   1
   1 -12  -4 262.660 34.9883   1
  12   4   2 1948.83 85.1421   1
   2 -12  -4 1874.23 81.5540   1
  -2  12  -4 1907.93 70.9450   1
   3 -12  -4 1320.77 66.0458   1
  12   4   3 1218.84 65.0267   1
  -3  12  -4 1124.35 49.8031   1
  12   4   4 20.9166 23.8279   1
   4 -12  -4 8.28881 21.7591   1
  12   4   5 108.984 29.3588   1
  12   4   6 894.871 57.6016   1
   6  12   4 876.106 61.6215   1
   7  12   4 548.786 53.4542   1
  12   4   7 643.733 50.6950   1
  12   4   8 1561.43 75.5680   1
   8  12   4 1305.48 80.5614   1
   9  12   4 124.882 33.8781   1
  12   4   9 87.1721 27.9731   1
  12   4  10 400.733 41.3331   1
  10  12   4 337.091 45.7377   1
  12   4  11 1612.17 77.7297   1
  11  12   4 1505.55 88.6334   1
  11 -12   5 87.0606 13.8824   1
 -12  -5 -11 105.712 26.8509   1
 -12  -5 -10 1495.38 75.0586   1
  10 -12   5 1525.90 51.1474   1
  -5  -9 -12 10107.4 290.484   1
   9 -12   5 10371.1 249.898   1
 -12  -5  -9 10298.1 282.695   1
   8 -12   5 405.620 24.7924   1
  12  -5   8 430.494 23.8405   1
   8  12  -5 377.559 43.3491   1
  -8 -12  -5 428.370 47.6729   1
 -12  -5  -8 430.672 42.2872   1
  -5  -8 -12 428.352 46.2380   1
 -12  -5  -7 38553.1 919.540   1
   7  12  -5 38641.8 927.387   1
   7 -12   5 39946.0 889.584   1
  -5  -7 -12 38761.1 925.024   1
  12  -5   7 38520.6 887.618   1
  -7 -12  -5 37676.6 932.300   1
  -6 -12  -5 3223.66 123.149   1
   6 -12   5 3169.62 91.4243   1
  12  -5   6 3017.17 89.5947   1
   6  12  -5 2932.76 114.765   1
  -5  -6 -12 3159.86 115.381   1
  -5  -5 -12 6736.19 196.712   1
   5 -12   5 6730.82 175.425   1
  -5 -12  -5 6517.51 205.836   1
   5  12  -5 6959.49 201.032   1
  -5  -4 -12 110.015 25.6727   1
   4 -12   5 159.475 19.8598   1
  -4 -12  -5 170.577 31.8053   1
  -5  -3 -12 16787.5 414.462   1
   3  12  -5 16640.4 417.887   1
  -3 -12  -5 16442.9 430.125   1
  -5  -2 -12 2622.94 93.2971   1
   2  12  -5 2596.30 96.0742   1
  -2 -12  -5 2722.20 108.119   1
   1  12  -5 11034.9 287.538   1
  -5  -1 -12 10962.8 282.705   1
  -1 -12  -5 11267.2 302.783   1
   0  12  -5 14.9240 20.2682   1
  -5   0 -12 41.6573 18.2370   1
  12   5   0 68.9890 27.3717   1
   0 -12  -5 9.45965 25.7657   1
  12   5   1 10456.1 295.619   1
   1 -12  -5 11134.9 296.769   1
  -1  12  -5 11102.8 278.943   1
   2 -12  -5 2818.47 104.671   1
  12   5   2 2637.34 104.959   1
  -2  12  -5 2588.72 87.6826   1
   3 -12  -5 16616.4 419.903   1
  12   5   3 16185.4 421.434   1
  -3  12  -5 16552.8 396.151   1
  -4  12  -5 133.453 19.0224   1
  12   5   4 162.369 31.9430   1
   4 -12  -5 142.970 27.6594   1
  12   5   5 6381.78 194.573   1
   5  12   5 6217.88 196.533   1
   6  12   5 3323.07 127.111   1
  12   5   6 3106.75 121.007   1
  12   5   7 38843.1 917.374   1
   7  12   5 37864.8 924.115   1
   8  12   5 372.599 46.3425   1
  12   5   8 401.622 43.7647   1
   9  12   5 10612.6 304.617   1
  12   5   9 10302.7 291.388   1
  12   5  10 1642.54 81.8313   1
  10  12   5 1663.14 91.2705   1
  11  12   5 105.169 36.7502   1
  12   5  11 94.6571 28.7203   1
  11 -12   6 926.616 30.8397   1
 -12  -6 -11 881.815 59.7930   1
  -6 -10 -12 226.806 41.4911   1
  10  12  -6 261.439 42.0457   1
  10 -12   6 188.661 14.0992   1
 -12  -6 -10 172.817 33.7238   1
  -6  -9 -12 233.257 37.5493   1
   9  12  -6 168.897 36.5651   1
   9 -12   6 219.389 15.1437   1
 -12  -6  -9 150.607 33.0118   1
  12  -6   8 2238.70 61.3246   1
 -12  -6  -8 2152.81 94.1937   1
   8  12  -6 2296.53 101.668   1
  -6  -8 -12 2367.18 101.154   1
  12  -6   7 26.5658 11.4292   1
  -7 -12  -6 7.62416 29.0554   1
  -6  -7 -12 9.96500 27.9209   1
   7  12  -6-3.38159 29.2032   1
 -12  -6  -7-3.16541 25.3978   1
   6  12  -6 5595.18 177.889   1
  -6 -12  -6 5679.06 185.583   1
  -6  -6 -12 5444.48 175.905   1
  12  -6   6 5773.72 145.454   1
  -5 -12  -6 1686.61 84.8718   1
   5  12  -6 1635.04 78.6734   1
  -6  -5 -12 1713.17 78.3456   1
   4  12  -6 4708.06 147.745   1
  -4 -12  -6 4413.28 156.092   1
  -6  -4 -12 4621.57 145.991   1
   3  12  -6 3369.96 116.405   1
  -6  -3 -12 3435.33 114.612   1
  -3 -12  -6 3233.10 126.627   1
   2  12  -6 1283.30 62.6821   1
  -2 -12  -6 1348.78 74.1201   1
  -6  -2 -12 1347.18 62.2818   1
  -6  -1 -12 557.213 38.0710   1
   1  12  -6 618.474 41.4073   1
   0 -12  -6 1235.15 70.4409   1
  12   6   0 1261.24 70.8376   1
   0  12  -6 1301.55 60.0620   1
  -6   0 -12 1332.94 57.0463   1
  -6   1 -12 529.774 34.4798   1
  12   6   1 461.128 44.9232   1
  -1  12  -6 559.104 37.9305   1
   1 -12  -6 608.442 49.2871   1
  -6   2 -12 1379.12 54.4755   1
  -2  12  -6 1384.05 57.5662   1
  12   6   2 1338.43 72.5538   1
   2 -12  -6 1421.09 72.4159   1
  -6   3 -12 3503.47 101.976   1
   3 -12  -6 3757.58 128.770   1
  -3  12  -6 3501.83 105.446   1
  12   6   3 3563.95 130.250   1
   4  12   6 4606.68 157.618   1
  12   6   4 4811.23 157.843   1
  -4  12  -6 4760.73 126.494   1
  -6   4 -12 4473.88 123.397   1
   5  12   6 1533.98 80.9952   1
  12   6   5 1529.64 80.3680   1
  12   6   6 5404.64 176.667   1
   6  12   6 5389.26 179.845   1
   7  12   6 27.3450 30.5709   1
  12   6   7 21.5914 29.3985   1
   8  12   6 2193.67 103.230   1
  12   6   8 2246.22 100.043   1
   9  12   6 235.886 41.9827   1
  -6   9 -12 174.066 12.0618   1
  12   6   9 161.866 36.3613   1
  -6  10 -12 174.021 11.3089   1
  12   6  10 198.817 39.6129   1
  10  12   6 217.449 43.2512   1
  12   6  11 926.200 63.7593   1
  11  12   6 901.428 70.1989   1
  -6  11 -12 799.990 26.3567   1
  -7 -11 -12 161.170 40.9901   1
 -12  -7 -11 173.841 36.9158   1
 -12  -7 -10 23599.1 583.832   1
  -7 -10 -12 23049.6 591.221   1
  -7  -9 -12 145.609 37.4320   1
 -12  -7  -9 100.926 33.3083   1
   9  12  -7 105.757 35.1908   1
 -12  -7  -8 3124.32 119.669   1
  -7  -8 -12 3026.36 121.038   1
   8  12  -7 3051.60 121.224   1
   7  12  -7 7226.78 217.767   1
  12  -7   7 7269.34 173.684   1
  -7  -7 -12 7324.93 219.851   1
 -12  -7  -7 7458.08 218.966   1
 -12  -7  -6 781.791 55.7011   1
  -6 -12  -7 826.798 60.2569   1
   6  12  -7 811.404 57.0813   1
  12  -7   6 860.082 32.6856   1
  -7  -6 -12 932.055 59.6179   1
   5  12  -7 5035.02 165.168   1
  -5 -12  -7 5337.63 177.263   1
  -7  -5 -12 5453.91 167.048   1
  -4 -12  -7 3073.38 122.344   1
  -7  -4 -12 3292.78 114.580   1
   4  12  -7 3031.71 112.733   1
  -7  -3 -12 859.247 52.5768   1
  -3 -12  -7 886.522 63.0819   1
   3  12  -7 829.468 52.1248   1
  -7  -2 -12 13886.1 347.191   1
  -2 -12  -7 13498.8 365.924   1
   2  12  -7 13566.8 347.586   1
   1  12  -7 3550.95 115.216   1
  -7  -1 -12 3635.30 114.425   1
  12   7  -1 3370.67 129.116   1
  -1 -12  -7 3386.02 129.585   1
  -7   0 -12 45176.2 1037.39   1
   0  12  -7 45045.5 1038.57   1
   0 -12  -7 45374.1 1062.44   1
  12   7   0 43685.4 1062.98   1
  -1  12  -7 3369.99 109.382   1
   1 -12  -7 3727.47 131.145   1
  12   7   1 3651.11 132.119   1
  -7   1 -12 3585.80 108.776   1
  12   7   2 13804.0 364.269   1
  -7   2 -12 13237.5 330.175   1
   2 -12  -7 13289.7 357.936   1
  -2  12  -7 14021.7 334.279   1
  -3  12  -7 851.402 41.4832   1
  12   7   3 954.197 62.3326   1
   3 -12  -7 783.087 56.3773   1
  -7   3 -12 892.944 39.4189   1
  -7   4 -12 3144.07 89.6030   1
  12   7   4 3231.66 124.551   1
  -4  12  -7 3102.32 91.1487   1
  12   7   5 5195.50 171.341   1
  -7   5 -12 5101.43 129.679   1
   5  12   7 4775.55 168.215   1
   6  12   7 891.370 61.8656   1
  12   7   6 902.738 61.5726   1
  -7   6 -12 802.976 30.3683   1
   7  12   7 7193.09 231.790   1
  12   7   7 7521.89 231.104   1
  -7   7 -12 7668.95 178.645   1
   8  12   7 3040.86 127.399   1
  12   7   8 3206.36 125.876   1
   9  12   7 111.832 38.7024   1
  12   7   9 35.0368 32.3877   1
  10  12   7 22807.0 598.715   1
  12   7  10 23886.3 591.486   1
  12   7  11 102.917 35.5876   1
  11  12   7 238.921 44.6438   1
 -12  -8 -11 464.211 50.6783   1
  -8 -11 -12 414.532 50.8329   1
 -12  -8 -10 1781.36 90.0700   1
  -8 -10 -12 1800.77 92.9264   1
  -8  -9 -12 3105.34 125.683   1
 -12  -8  -9 3053.22 122.546   1
  -8  -8 -12 1088.43 67.6820   1
 -12  -8  -8 948.026 64.6112   1
 -12  -8  -7 640.033 52.8412   1
  -8  -7 -12 705.937 53.8841   1
  -8  -6 -12 524.547 47.9183   1
  12  -8   6 587.776 24.4788   1
   5  12  -8 1851.12 84.7069   1
  -8  -5 -12 2029.50 88.4356   1
  -5 -12  -8 1984.88 95.0808   1
  -8  -4 -12 3576.57 124.542   1
  -4 -12  -8 3381.42 134.461   1
   4  12  -8 3743.25 126.275   1
  -3 -12  -8 5243.48 175.986   1
  -8  -3 -12 5372.97 161.098   1
   3  12  -8 5138.91 159.814   1
  -2 -12  -8-7.28499 31.3017   1
  12   8  -2 3.65796 38.3569   1
   2  12  -8 68.4663 21.8991   1
  -8  -2 -12 70.3361 23.7524   1
  -1 -12  -8 81.3736 33.2480   1
  -8  -1 -12 110.865 25.4847   1
   1  12  -8 120.460 26.1657   1
  12   8  -1 62.4092 36.8655   1
   0  12  -8 18611.8 451.382   1
   0 -12  -8 18406.4 474.670   1
  -8   0 -12 18938.3 450.813   1
  12   8   0 17987.7 476.187   1
  -8   1 -12 88.1341 21.8663   1
  -1  12  -8 74.2956 23.3422   1
  12   8   1 106.626 37.0417   1
   1 -12  -8 61.2789 31.3969   1
   2 -12  -8 10.1231 25.7321   1
  -8   2 -12 60.1074 17.8032   1
  12   8   2 51.6764 30.8636   1
  -2  12  -8 28.5412 18.1776   1
  12   8   3 5339.36 176.082   1
  -3  12  -8 5043.33 141.323   1
  -8   3 -12 5294.59 139.944   1
  -8   4 -12 3677.87 102.791   1
  -4  12  -8 3843.28 105.275   1
  12   8   4 3836.50 141.429   1
  -8   5 -12 1955.54 58.4817   1
  12   8   5 1995.81 96.0746   1
  12   8   6 620.283 54.9726   1
  -8   6 -12 568.528 21.7119   1
  12   8   7 739.179 58.6434   1
   7  12   8 715.179 60.0580   1
   8  12   8 1193.11 75.8240   1
  12   8   8 1064.60 71.8685   1
  12   8   9 3042.43 126.804   1
   9  12   8 3049.17 129.920   1
  12   8  10 1719.11 92.7654   1
  10  12   8 1750.92 96.8264   1
  11  12   8 487.695 56.9602   1
  12   8  11 564.114 56.7563   1
 -12  -9 -11 185.904 41.1229   1
 -11 -12  -9 249.753 44.2768   1
  -9 -11 -12 235.886 43.7228   1
 -12  -9 -10 3619.16 140.063   1
  -9 -10 -12 3685.04 142.624   1
 -12  -9  -9 811.834 63.2951   1
  -9  -9 -12 920.495 66.5234   1
  -9  -8 -12 5844.56 186.815   1
 -12  -9  -8 5470.17 186.336   1
  -9  -7 -12 451.774 45.3268   1
 -12  -9  -7 392.755 47.1524   1
  -9  -6 -12 1032.80 64.2269   1
 -12  -9  -6 955.457 65.3590   1
  -9  -5 -12 793.760 55.4436   1
  -9  -4 -12 391.635 39.1983   1
  -4 -12  -9 353.560 45.0822   1
  -3 -12  -9 30.5911 26.6807   1
   3  12  -9 45.1291 23.2885   1
  -9  -3 -12 13.4379 22.7200   1
  12   9  -3 3.83676 30.7855   1
  -9  -2 -12 5712.54 168.194   1
  12   9  -2 5443.84 185.421   1
   2  12  -9 5476.58 167.100   1
  -9  -1 -12 735.921 47.0585   1
   1  12  -9 734.514 45.9704   1
  -1 -12  -9 796.911 60.7926   1
  12   9  -1 812.717 62.2433   1
  12   9   0 41516.1 972.338   1
   0 -12  -9 40466.5 967.192   1
   0  12  -9 40550.1 939.745   1
  -9   0 -12 39748.5 938.925   1
  -1  12  -9 776.072 43.3503   1
   1 -12  -9 784.369 58.8713   1
  -9   1 -12 808.998 43.5538   1
  12   9   1 708.229 61.2754   1
  -2  12  -9 5575.54 151.793   1
  -9   2 -12 5485.61 150.210   1
   2 -12  -9 5398.11 178.430   1
  12   9   2 5390.69 181.932   1
  -9   3 -12 57.3812 14.9331   1
  -3  12  -9 37.8793 15.0224   1
  -4  12  -9 368.463 24.2876   1
  12   9   4 346.625 44.4500   1
  -9   4 -12 424.624 24.2005   1
  -9   5 -12 863.654 32.2840   1
  12   9   5 927.025 66.0163   1
  12   9   6 1064.07 72.0842   1
   7  12   9 503.059 53.5362   1
  12   9   7 484.131 52.8823   1
   8  12   9 5449.87 189.275   1
  12   9   8 5592.94 190.267   1
   9  12   9 905.253 68.7749   1
  12   9   9 791.967 65.9903   1
  10  12   9 3866.68 151.760   1
  12   9  10 3647.81 145.047   1
  12   9  11 272.727 42.9290   1
  11  12   9 261.123 46.2704   1
 -10 -11 -12 678.703 62.4821   1
 -12 -10 -11 583.133 58.3010   1
 -11 -12 -10 644.794 59.9878   1
 -12 -10 -10 2886.13 124.550   1
 -10 -12 -10 2982.00 127.651   1
 -10 -10 -12 2968.69 125.799   1
 -12 -10  -9 1130.53 74.8371   1
 -10  -9 -12 1201.09 75.6054   1
 -12 -10  -8 321.470 46.3352   1
 -10  -8 -12 262.438 41.3587   1
 -12 -10  -7 3446.96 135.897   1
 -10  -7 -12 3378.94 129.631   1
 -12 -10  -6 7354.95 228.684   1
  12 -10   6 7340.26 173.787   1
 -10  -6 -12 7531.42 221.460   1
 -10  -5 -12 189.964 35.2894   1
  12  10  -4 18331.8 488.784   1
 -10  -4 -12 19259.9 474.462   1
  12  10  -3 1203.24 74.8901   1
 -10  -3 -12 1257.69 64.1889   1
  -3 -12 -10 1169.22 73.6563   1
  -2 -12 -10 1211.34 74.4945   1
 -10  -2 -12 1307.08 63.7114   1
  12  10  -2 1210.78 74.9063   1
   1  12 -10 5939.98 172.278   1
  12  10  -1 6098.46 197.931   1
 -10  -1 -12 5966.13 172.040   1
  -1 -12 -10 5962.31 193.478   1
   0 -12 -10 7345.67 225.893   1
   0  12 -10 7470.05 203.507   1
  12  10   0 7434.56 232.293   1
 -10   0 -12 7650.65 203.428   1
   1 -12 -10 6000.12 192.074   1
  12  10   1 6021.20 198.272   1
  -1  12 -10 6056.74 166.260   1
 -10   1 -12 5876.38 164.650   1
  -2  12 -10 1353.55 54.3269   1
 -10   2 -12 1257.80 52.0495   1
   2 -12 -10 1214.38 72.6531   1
  12  10   2 1293.47 78.1718   1
 -10   3 -12 1180.34 46.9922   1
  12  10   3 1308.56 77.9083   1
  -3  12 -10 1166.97 48.7409   1
  12  10   4 20078.3 482.280   1
 -10   4 -12 19365.6 422.107   1
  12  10   5 133.200 40.0359   1
  12  10   6 7488.03 238.508   1
  12  10   7 3490.41 142.395   1
  12  10   8 351.089 50.5671   1
   8  12  10 345.862 47.4526   1
  12  10   9 1121.43 78.6807   1
   9  12  10 1222.89 79.9881   1
  12  10  10 3032.64 132.239   1
  10  12  10 3246.41 136.667   1
  11  12  10 582.460 59.8855   1
  12  10  11 576.523 59.3550   1
 -11 -12 -11 3403.71 141.103   1
 -12 -11 -11 3578.70 142.253   1
 -11 -11 -12 3207.21 136.823   1
 -10 -12 -11 2764.04 121.219   1
 -12 -11 -10 2644.21 119.770   1
 -11 -10 -12 2411.15 114.689   1
  -9 -12 -11 188.354 43.3436   1
 -11  -9 -12 214.474 38.3193   1
 -12 -11  -9 133.673 39.3490   1
 -12 -11  -8 1636.99 90.7364   1
 -11  -8 -12 1575.15 85.3216   1
 -12 -11  -7 25.3887 37.4995   1
 -11  -7 -12 50.8122 31.5183   1
 -11  -6 -12 2352.67 98.7888   1
  12 -11   6 2214.25 59.7160   1
 -11  -5 -12 1813.10 83.4124   1
  12 -11   5 1831.85 56.8501   1
 -11  -4 -12-17.9269 24.4080   1
  12  11  -3 87.8003 36.3421   1
 -11  -3 -12 82.9541 26.1099   1
  -2 -12 -11 7.88947 31.2619   1
 -11  -2 -12-2.54946 22.3642   1
  12  11  -2 86.9925 35.0129   1
 -11  -1 -12 1035.89 54.8815   1
  12  11  -1 1073.53 72.1046   1
  12  11   0 314.795 44.7540   1
   0  12 -11 279.524 29.3402   1
 -11   0 -12 384.378 31.6547   1
   0 -12 -11 335.153 41.4599   1
 -11   1 -12 1122.86 51.4634   1
  12  11   1 1096.72 73.5097   1
   1 -12 -11 1085.72 68.9340   1
  -1  12 -11 1093.37 51.5534   1
  12  11   2 21.4771 32.3093   1
 -11   2 -12 63.2918 17.9329   1
  -2  12 -11 42.5853 16.9745   1
  12  11   3 83.2477 36.8950   1
  -3  12 -11 100.140 18.8165   1
 -11   3 -12 106.200 17.3343   1
  -4  12 -11-1.22332 10.8921   1
  12  11   4 13.3418 32.7288   1
  12  11   5 1781.17 97.1466   1
  12  11   6 2194.00 111.270   1
  -6  12 -11 2288.61 59.5595   1
  12  11   7 60.5662 39.3980   1
  11   8  12 1640.46 89.2977   1
  12  11   8 1716.48 96.8477   1
  11   9  12 148.783 39.4833   1
  12  11   9 145.636 42.9779   1
  10  12  11 2717.07 124.107   1
  11  10  12 2558.41 119.869   1
  12  11  10 2603.02 122.359   1
  11  12  11 3452.02 147.182   1
  12  11  11 3631.51 148.648   1
  11  11  12 3566.95 148.185   1
 -12 -12 -12 1888.39 105.256   1
 -11 -12 -12 3525.50 144.925   1
 -12 -11 -12 3335.55 141.195   1
 -12 -12 -11 3351.59 142.329   1
 -10 -12 -12 101.641 37.7864   1
 -12 -10 -12 77.9783 32.3976   1
 -12 -12 -10 83.1647 35.9707   1
 -12 -12  -9 1877.43 99.1026   1
  -9 -12 -12 1877.79 99.7946   1
 -12  -9 -12 1743.26 92.9141   1
  -8 -12 -12 240.742 44.3095   1
 -12  -8 -12 140.701 39.7318   1
 -12 -12  -8 233.410 43.7914   1
 -12  -7 -12 6372.80 201.357   1
  12 -12   6 55.7031 10.0785   1
 -12  -6 -12 59.1728 27.4379   1
 -12  -5 -12 52.2570 26.9934   1
  12 -12   5 15.1637 10.9925   1
 -12  -4 -12 423.861 42.2964   1
  12 -12   4 536.388 29.6907   1
 -12  -3 -12 8384.25 235.961   1
  12  12  -2 605.216 57.6212   1
 -12  -2 -12 522.239 42.2886   1
 -12  -1 -12 2792.43 98.0165   1
  12  12  -1 2746.23 121.059   1
  -1 -12 -12 2615.34 116.197   1
   0 -12 -12-11.9642 28.2669   1
  12  12   0-4.38810 31.5842   1
 -12   0 -12 30.2873 18.4848   1
  12  12   1 2760.25 121.717   1
 -12   1 -12 2629.55 90.7113   1
  -1  12 -12 2770.37 91.9758   1
   1 -12 -12 2747.27 116.231   1
 -12   2 -12 496.519 33.2396   1
  12  12   2 534.474 55.3441   1
  -2  12 -12 610.423 36.0503   1
  -3  12 -12 8293.64 212.514   1
  12  12   3 8452.77 260.971   1
  12  12   4 454.960 55.5205   1
  12   4  12 545.354 47.2345   1
  -4  12 -12 437.070 26.4418   1
  12  12   5 18.9385 36.3330   1
  12   5  12 35.9210 26.4436   1
  12   6  12 30.6031 29.9676   1
  12  12   6 91.3881 37.9040   1
  -6  12 -12 67.1976 8.99434   1
  12   7  12 5685.76 191.615   1
  12  12   7 5851.15 203.581   1
  12  12   8 200.575 45.8765   1
  12   8  12 196.043 42.1077   1
  12  12   9 1930.96 103.195   1
  12   9  12 1792.91 96.3447   1
  12  10  12 56.3959 35.6226   1
  12  12  10 119.513 41.8946   1
  12  12  11 3403.66 145.698   1
  11  12  12 3136.76 140.766   1
  12  11  12 3122.46 139.591   1
  12  12  12 2258.99 117.174   1
   0 -13   0 2.81008 19.4445   1
   0  13   0 2.60593 20.2592   1
   1  13   0-13.7526 20.0949   1
   1 -13   0-5.46760 20.1191   1
  -1  13   0-7.40218 19.9157   1
  -1 -13   0 14.5157 20.8957   1
   2 -13   0 5249.56 157.222   1
   2  13   0 4983.67 160.270   1
  -2 -13   0 5021.39 161.041   1
  -3 -13   0 6.26984 22.7346   1
   3  13   0 9.34581 23.9029   1
   3 -13   0 7.75569 20.8673   1
   4  13   0 189.794 33.0513   1
   4 -13   0 160.756 26.1746   1
  13   0   4 181.510 27.0119   1
  -4 -13   0 215.870 35.2493   1
   5 -13   0 2.43906 19.5678   1
  13   0   5-2.43264 18.4142   1
  -5 -13   0 10.2389 25.4785   1
  -6 -13   0 9209.22 259.645   1
  13   0   6 8907.61 240.829   1
   6 -13   0 8821.55 239.844   1
   7 -13   0 2.31334 19.5517   1
  13   0   7-14.7326 23.6314   1
  13   0   8 86.7302 22.3670   1
   8 -13   0 89.1126 22.1700   1
  13   0   9-7.42136 18.9811   1
  13   0  10 2465.23 91.2180   1
  11  13   0-30.8777 35.1735   1
  13   0  11-7.32315 18.0964   1
  12  13   0 124.063 36.9657   1
 -13   0 -12 131.121 22.7019   1
   0 -12 -13 103.593 34.3518   1
 -13  -1 -12 4570.35 141.865   1
  12  13  -1 4461.77 167.160   1
  13  -1  11 262.832 28.4785   1
 -13  -1 -11 181.896 26.8505   1
  13  -1  10 382.156 32.7986   1
   9 -13   1 219.149 24.9782   1
  13  -1   9 191.658 24.8477   1
   8 -13   1 68.1451 18.3486   1
  -8 -13  -1 30.7827 33.2581   1
  13  -1   8 78.5477 21.0912   1
  13  -1   7 3654.29 116.828   1
   7 -13   1 3620.55 115.397   1
  -7 -13  -1 3567.59 134.852   1
   6 -13   1 324.859 29.9481   1
  13  -1   6 306.073 30.8735   1
   5 -13   1 19817.3 481.556   1
  -5 -13  -1 19194.4 499.051   1
   5  13  -1 19941.3 500.166   1
  13  -1   5 19861.0 479.869   1
  13  -1   4 482.188 37.3840   1
   4  13  -1 564.166 46.9064   1
  -4 -13  -1 540.288 48.0421   1
   4 -13   1 578.146 41.0514   1
   3 -13   1 4541.18 142.605   1
   3  13  -1 4662.88 151.253   1
  -3 -13  -1 4681.97 153.785   1
   2 -13   1 108.859 24.0880   1
  -2 -13  -1 139.707 26.7938   1
   2  13  -1 103.973 25.7193   1
   1  13  -1 196.149 29.9757   1
   1 -13   1 112.093 23.1470   1
  -1 -13  -1 217.494 31.3046   1
   0  13  -1 15.1506 20.2628   1
   0 -13  -1 8.80720 20.1515   1
   0  13   1 21.4928 19.6326   1
   0 -13   1 37.9577 22.1503   1
   1  13   1 167.582 28.5255   1
  -1 -13   1 124.614 27.1993   1
   1 -13  -1 142.175 28.6677   1
  -1  13  -1 125.919 23.1671   1
   2 -13  -1 158.412 27.9202   1
  -2  13  -1 132.996 24.3293   1
   2  13   1 131.391 29.2662   1
  -2 -13   1 134.731 27.0202   1
  -3 -13   1 4664.60 152.390   1
   3 -13  -1 4765.74 147.438   1
   3  13   1 4499.91 151.795   1
  13   1   3 4474.66 144.270   1
  -4 -13   1 572.796 46.7537   1
  13   1   4 557.145 41.7243   1
   4 -13  -1 583.797 42.6332   1
  -5 -13   1 19974.4 509.442   1
   5 -13  -1 20164.7 495.449   1
  13   1   5 20432.7 497.072   1
  13   1   6 249.917 31.9025   1
   6 -13  -1 318.870 32.6026   1
  13   1   7 3631.41 124.141   1
   7 -13  -1 3786.33 121.743   1
   8 -13  -1 66.7293 22.1627   1
  13   1   8 65.0668 23.8233   1
  13   1   9 195.123 29.6288   1
  10  13   1 383.519 48.6977   1
  13   1  10 364.694 36.5084   1
  11  13   1 211.217 41.9577   1
  13   1  11 283.394 33.0206   1
  12  13   1 4259.23 164.932   1
   1 -12 -13 4544.21 161.818   1
 -13  -2 -12 2669.35 100.636   1
  11 -13   2 6760.03 181.330   1
 -13  -2 -11 6447.98 191.123   1
 -13  -2 -10 317.646 33.6686   1
  13  -2  10 380.244 30.4675   1
  10 -13   2 319.298 27.5126   1
  -9 -13  -2 1529.97 84.4714   1
   9 -13   2 1425.07 59.3075   1
  13  -2   9 1390.94 59.7515   1
  -8 -13  -2 799.857 61.0431   1
  13  -2   8 724.542 41.4686   1
   8 -13   2 813.279 43.1415   1
  -7 -13  -2 271.971 41.9927   1
  13  -2   7 356.907 30.9752   1
  13  -2   6 5206.86 151.349   1
   6  13  -2 5240.41 172.975   1
   6 -13   2 5248.61 152.363   1
  -6 -13  -2 5452.53 175.371   1
  13  -2   5 57.7255 19.4226   1
   5  13  -2-13.1567 28.8522   1
  -5 -13  -2 24.6942 30.4671   1
   5 -13   2 12.8867 20.8507   1
  -4 -13  -2 5677.22 179.694   1
   4 -13   2 5563.02 162.268   1
  13  -2   4 5673.95 160.373   1
   4  13  -2 5567.71 175.584   1
   3  13  -2 7624.37 220.942   1
  -3 -13  -2 7860.52 227.742   1
   3 -13   2 7697.06 211.203   1
   2 -13   2 3609.54 116.773   1
  -2 -13  -2 3300.92 124.434   1
   2  13  -2 3569.04 121.894   1
   1 -13   2 3831.41 127.181   1
  -1 -13  -2 4105.43 138.032   1
   1  13  -2 4086.00 132.047   1
   0 -13  -2-6.07274 22.5080   1
   0  13  -2 42.3344 22.2832   1
   0  13   2 36.5609 24.4140   1
   0 -13   2-10.4518 17.7829   1
   1 -13  -2 3969.35 135.621   1
  -1 -13   2 4185.62 134.149   1
   1  13   2 3847.24 133.549   1
  -1  13  -2 4007.37 126.759   1
  13   2   2 3256.92 117.722   1
  -2 -13   2 3360.15 118.230   1
   2 -13  -2 3371.96 119.378   1
  -2  13  -2 3473.14 110.057   1
   2  13   2 3295.34 120.542   1
  13   2   3 8089.53 222.858   1
  -3 -13   2 7517.30 222.514   1
   3 -13  -2 7833.55 221.475   1
   4 -13  -2 5466.22 167.424   1
  13   2   4 5623.47 169.503   1
   5 -13  -2 31.9706 19.7561   1
  13   2   5 16.8757 20.7063   1
   6 -13  -2 5415.40 161.086   1
  13   2   6 5215.49 164.350   1
  13   2   7 441.022 41.5810   1
   7 -13  -2 496.716 39.3288   1
  13   2   8 719.289 49.8981   1
   9  13   2 1296.34 79.2052   1
  13   2   9 1417.09 69.9930   1
  13   2  10 327.881 36.3233   1
  10  13   2 337.913 45.7760   1
  11  13   2 6949.29 223.568   1
  13   2  11 6622.75 197.907   1
  12  13   2 2554.58 119.489   1
  13   2  12 2612.47 102.256   1
  12 -13   3 6999.69 184.407   1
 -13  -3 -12 6759.88 201.898   1
  11 -13   3 32.8766 16.8673   1
 -13  -3 -11-14.2735 27.0063   1
  10 -13   3 529.213 33.3143   1
 -10 -13  -3 566.834 53.6669   1
  13  -3  10 568.622 33.3857   1
 -13  -3 -10 453.260 41.3789   1
   9 -13   3-3.55646 15.9896   1
  13  -3   9-10.1297 16.0408   1
  -9 -13  -3-4.08518 33.1716   1
  -8 -13  -3 67.2539 29.6157   1
  -3  -8 -13 89.4825 30.5714   1
   8 -13   3 140.186 20.5852   1
  13  -3   8 81.1478 19.5206   1
   7  13  -3 4065.50 143.585   1
  13  -3   7 3936.59 117.251   1
  -3  -7 -13 3905.62 136.764   1
  -7 -13  -3 3546.48 139.393   1
   7 -13   3 3912.47 117.450   1
   6 -13   3 926.890 46.9857   1
   6  13  -3 784.901 57.2237   1
  -3  -6 -13 928.325 58.0482   1
  13  -3   6 879.308 44.1604   1
  -6 -13  -3 898.469 62.1582   1
  -5 -13  -3 642.721 54.7467   1
  13  -3   5 676.682 38.8058   1
   5  13  -3 563.578 48.3632   1
   5 -13   3 706.680 41.5345   1
  -4 -13  -3 5911.01 188.898   1
   4 -13   3 6029.10 169.156   1
   4  13  -3 6036.61 184.250   1
   3  13  -3 221.594 33.7111   1
  -3 -13  -3 184.388 35.9742   1
   3 -13   3 218.608 27.5227   1
   2  13  -3 647.896 47.5247   1
   2 -13   3 637.693 41.9843   1
  -2 -13  -3 551.701 47.8143   1
   1 -13   3 416.018 35.8058   1
   1  13  -3 471.185 38.3475   1
  -1 -13  -3 406.898 42.4694   1
   0 -13  -3 28.4786 26.6079   1
   0  13  -3 68.1229 24.3046   1
   0 -13   3 17.8666 20.6172   1
  -1  13  -3 430.141 34.3094   1
   1  13   3 452.309 42.3953   1
   1 -13  -3 404.540 40.7707   1
  -1 -13   3 419.796 37.7619   1
  13   3   2 622.217 47.8794   1
  -2  13  -3 630.007 40.4023   1
   2 -13  -3 609.684 48.0546   1
  13   3   3 205.993 32.8546   1
   3 -13  -3 240.571 32.6334   1
  -3  13  -3 205.350 26.1745   1
  13   3   4 6048.23 184.233   1
   4 -13  -3 6079.19 181.669   1
  13   3   5 664.898 49.1367   1
   5 -13  -3 704.084 48.0668   1
  13   3   6 813.424 54.3708   1
   6 -13  -3 940.247 54.0773   1
  13   3   7 4145.09 140.255   1
   8  13   3 53.7283 32.4075   1
  13   3   8 129.776 29.8850   1
  13   3   9-6.35546 25.0250   1
   9  13   3-30.0063 34.3914   1
  10  13   3 457.641 51.9581   1
  13   3  10 660.881 49.4988   1
  11  13   3 18.4202 32.9038   1
  13   3  11 51.1191 27.3101   1
  12  13   3 6711.77 223.959   1
  13   3  12 6778.51 202.271   1
  -3  12 -13 6639.47 177.080   1
  12 -13   4 1090.12 47.6225   1
 -13  -4 -12 1323.08 67.6496   1
  11 -13   4 2584.81 82.8408   1
 -13  -4 -11 2688.91 106.049   1
 -13  -4 -10 316.506 38.3816   1
  10 -13   4 352.272 25.9293   1
 -10 -13  -4 396.244 47.6404   1
  -9 -13  -4 136.418 35.6404   1
   9 -13   4 121.850 18.7683   1
  -4  -9 -13 143.875 30.2881   1
 -13  -4  -9 144.475 27.9365   1
  13  -4   9 147.169 18.6220   1
  13  -4   8 20136.8 467.761   1
  -8 -13  -4 18962.5 506.736   1
   8 -13   4 19642.7 469.022   1
  -4  -8 -13 19997.2 502.648   1
   8  13  -4 19365.7 504.438   1
  13  -4   7 4.73204 17.3982   1
  -4  -7 -13-3.29255 27.0517   1
   7 -13   4 3.31731 17.4493   1
   7  13  -4 14.1385 32.2410   1
  -7 -13  -4-27.2618 33.6302   1
   6  13  -4 12206.4 327.675   1
  13  -4   6 11911.7 298.989   1
   6 -13   4 12214.9 300.019   1
  -6 -13  -4 12091.2 333.761   1
  -4  -6 -13 11891.5 321.935   1
   5  13  -4 901.987 60.3846   1
  -4  -5 -13 826.904 55.4400   1
   5 -13   4 872.888 45.0942   1
  -5 -13  -4 904.823 61.3631   1
  13  -4   5 892.355 43.5302   1
   4 -13   4 9277.33 239.643   1
  -4 -13  -4 8940.38 264.468   1
  -4  -4 -13 9248.30 252.590   1
   4  13  -4 9342.36 257.860   1
  -3 -13  -4 144.012 36.4094   1
   3  13  -4 123.202 30.8121   1
   3 -13   4 131.602 24.8856   1
   2 -13   4 5912.86 166.128   1
   2  13  -4 5680.92 172.674   1
  -2 -13  -4 5647.58 182.532   1
  -1 -13  -4 8149.82 241.883   1
   1 -13   4 8286.21 226.375   1
   1  13  -4 8666.08 231.942   1
   0  13  -4 16.6650 21.1974   1
   0 -13  -4-13.1169 29.6280   1
   1 -13  -4 8291.88 241.484   1
  13   4   1 8548.67 242.246   1
  -1  13  -4 8487.90 226.457   1
  13   4   2 5356.21 173.281   1
  -2  13  -4 5617.30 157.086   1
   2 -13  -4 5486.69 173.059   1
  -3  13  -4 120.045 23.4519   1
  13   4   3 119.643 33.5818   1
   3 -13  -4 123.512 29.4818   1
   4 -13  -4 9138.39 255.596   1
  13   4   4 9252.44 259.350   1
  13   4   5 970.355 61.5335   1
   5 -13  -4 931.251 56.7894   1
  13   4   6 12122.8 327.017   1
   7  13   4-20.0952 33.4022   1
  13   4   7 23.2291 28.0457   1
   8  13   4 20486.4 522.689   1
  13   4   8 19737.2 506.340   1
  13   4   9 201.227 33.7794   1
   9  13   4 174.568 40.4052   1
  13   4  10 363.071 38.7528   1
  10  13   4 357.909 49.9756   1
  11  13   4 2695.86 123.605   1
  -4  11 -13 2662.82 80.8423   1
  13   4  11 2784.75 110.230   1
  -4  12 -13 1144.29 46.2929   1
  13   4  12 1254.01 70.8209   1
  12  13   4 1254.38 84.2490   1
 -13  -5 -12 280.270 39.5813   1
  12 -13   5 312.552 22.6280   1
 -13  -5 -11 489.483 45.1068   1
  11 -13   5 396.490 25.0641   1
  10 -13   5-12.3502 14.0577   1
  -5 -10 -13-8.04196 31.8644   1
  10  13  -5-8.24078 33.2587   1
 -13  -5 -10-19.3839 25.4414   1
  -9 -13  -5 95.4716 30.7922   1
  -5  -9 -13 30.3499 27.9452   1
  13  -5   9 55.6878 13.2360   1
   9 -13   5 45.6685 14.3995   1
   9  13  -5 58.6062 32.6780   1
 -13  -5  -9 63.2940 25.7254   1
 -13  -5  -8 789.838 54.3150   1
  13  -5   8 827.892 36.9796   1
  -5  -8 -13 773.235 57.6116   1
   8  13  -5 908.918 64.1170   1
  -8 -13  -5 794.768 62.2311   1
   8 -13   5 844.575 38.1532   1
  -7 -13  -5 5843.19 196.194   1
  -5  -7 -13 6474.61 192.628   1
  13  -5   7 6004.42 159.544   1
   7 -13   5 6229.17 161.653   1
   7  13  -5 5897.03 192.056   1
   6  13  -5 56.9723 33.8720   1
  -5  -6 -13 31.3938 29.1930   1
   6 -13   5 52.1717 17.9167   1
  -6 -13  -5 42.2914 31.2389   1
  13  -5   6 57.8590 18.4279   1
  -5 -13  -5 30283.7 732.471   1
   5  13  -5 29492.4 719.471   1
   5 -13   5 30022.2 693.919   1
  -5  -5 -13 29040.2 716.073   1
  -4 -13  -5 665.608 55.9384   1
   4 -13   5 598.475 38.1235   1
  -5  -4 -13 589.416 46.2103   1
   4  13  -5 638.080 50.2594   1
  -3 -13  -5 20461.0 515.646   1
  -5  -3 -13 20323.6 497.590   1
   3  13  -5 19965.9 501.085   1
   2  13  -5 76.4833 27.9218   1
  -5  -2 -13 116.816 27.5369   1
  -2 -13  -5 84.9117 32.0339   1
  -1 -13  -5 2520.27 104.433   1
   1  13  -5 2382.25 91.3942   1
  -5  -1 -13 2398.80 87.6375   1
   0  13  -5-13.8715 24.0625   1
   0 -13  -5-3.36972 28.7911   1
  13   5   1 2398.19 101.261   1
  -1  13  -5 2331.21 85.2953   1
   1 -13  -5 2361.00 100.244   1
   2 -13  -5 98.8464 32.0071   1
  -2  13  -5 49.1155 22.6928   1
  13   5   2 113.606 32.8764   1
  -3  13  -5 20279.2 481.866   1
  13   5   3 19828.5 508.326   1
   3 -13  -5 20345.3 506.434   1
  -4  13  -5 635.259 36.5772   1
  13   5   4 632.823 54.8742   1
   4 -13  -5 638.757 52.0226   1
   5 -13  -5 30205.1 730.446   1
  13   5   5 30287.7 735.888   1
  13   5   6 17.4409 31.5403   1
   6  13   5 112.522 37.6773   1
  13   5   7 6342.96 198.130   1
   7  13   5 6259.40 205.150   1
   8  13   5 813.394 64.7887   1
  13   5   8 871.856 62.1053   1
  13   5   9 58.1892 28.2893   1
   9  13   5 22.0569 32.9453   1
  13   5  10-21.7082 25.8462   1
  10  13   5-13.7945 35.2822   1
  13   5  11 531.122 47.2230   1
  11  13   5 454.573 55.0924   1
  12  13   5 227.820 49.0413   1
  13   5  12 308.623 44.0015   1
 -13  -6 -12 2200.77 97.8611   1
  12 -13   6 2052.18 59.2753   1
  11  13  -6 2611.81 118.276   1
 -13  -6 -11 2679.52 109.094   1
  -6 -11 -13 2713.64 121.064   1
  11 -13   6 2676.32 73.0652   1
  10  13  -6 442.847 51.0318   1
 -13  -6 -10 440.963 45.0295   1
  10 -13   6 422.507 21.9240   1
  -6 -10 -13 409.557 48.2518   1
   9  13  -6 7033.49 224.002   1
  -6  -9 -13 7145.54 223.767   1
   9 -13   6 7276.77 177.501   1
 -13  -6  -9 7130.95 216.257   1
   8  13  -6 12434.6 342.797   1
  -6  -8 -13 12781.2 342.485   1
   8 -13   6 12731.6 298.087   1
  13  -6   8 12276.5 295.324   1
  -8 -13  -6 11926.6 346.304   1
 -13  -6  -8 12940.0 337.932   1
   7  13  -6 158.927 36.8756   1
  -6  -7 -13 152.061 33.8158   1
  13  -6   7 202.730 18.6661   1
  -7 -13  -6 250.006 41.7313   1
  -6  -6 -13 16466.0 414.417   1
  -6 -13  -6 15470.5 422.141   1
   6  13  -6 16146.6 414.394   1
  13  -6   6 15832.3 378.884   1
  -6  -5 -13 195.814 34.7690   1
   5  13  -6 182.163 36.2170   1
  -6  -4 -13 5782.55 178.654   1
   4  13  -6 6170.40 183.997   1
  -4 -13  -6 6091.77 196.171   1
  -3 -13  -6 3603.25 139.879   1
   3  13  -6 3684.55 127.732   1
  -6  -3 -13 4016.14 127.706   1
   2  13  -6 23872.2 583.862   1
  -6  -2 -13 24499.3 581.971   1
  -2 -13  -6 23786.5 601.312   1
  -1 -13  -6 7356.99 223.469   1
  -6  -1 -13 7416.49 203.366   1
   1  13  -6 7411.89 207.009   1
   0  13  -6-15.9289 22.6330   1
   0 -13  -6-20.9674 30.3371   1
  -6   0 -13-10.1809 19.3490   1
  13   6   0-24.5639 31.2467   1
  13   6   1 7360.24 225.115   1
  -6   1 -13 7557.01 200.772   1
  -1  13  -6 7398.33 204.176   1
   1 -13  -6 7995.51 227.024   1
  13   6   2 23913.6 591.166   1
  -2  13  -6 23747.6 563.350   1
   2 -13  -6 23654.6 586.958   1
  -6   2 -13 23531.4 558.649   1
  -3  13  -6 3586.85 109.985   1
   3 -13  -6 3566.88 131.170   1
  13   6   3 3478.91 132.688   1
  -6   3 -13 3757.68 107.045   1
  -4  13  -6 6224.14 167.138   1
  13   6   4 6509.50 201.363   1
   4 -13  -6 6500.15 195.551   1
   5  13   6 293.921 42.9244   1
  13   6   5 240.878 42.5777   1
   6  13   6 15704.5 418.209   1
  13   6   6 15598.9 414.332   1
  13   6   7 203.441 37.2505   1
   7  13   6 168.152 38.6778   1
   8  13   6 13268.3 361.376   1
  13   6   8 12527.0 351.394   1
  13   6   9 7057.80 223.065   1
   9  13   6 7490.53 234.066   1
  13   6  10 457.462 51.2531   1
  10  13   6 419.060 51.7032   1
  -6  10 -13 412.641 19.2702   1
  13   6  11 2772.92 116.828   1
  11  13   6 2820.41 128.584   1
  -6  11 -13 2735.51 71.6513   1
  13   6  12 2253.62 103.115   1
  12  13   6 2145.42 111.822   1
  -6  12 -13 2073.73 57.1735   1
 -13  -7 -12 9377.40 269.324   1
  12  13  -7 8935.68 279.619   1
  -7 -12 -13 9402.17 282.344   1
 -13  -7 -11 1402.34 79.9921   1
  -7 -11 -13 1572.45 89.5877   1
  11  13  -7 1529.88 89.1527   1
  -7 -10 -13 4.15638 33.1494   1
 -13  -7 -10 76.7846 34.4433   1
  10  13  -7 33.0511 34.1482   1
  -7  -9 -13 1019.03 71.0843   1
 -13  -7  -9 1128.16 70.1427   1
  13  -7   8 2418.50 64.1669   1
 -13  -7  -8 2581.73 107.088   1
   8  13  -7 2533.16 108.951   1
  -7  -8 -13 2592.84 109.078   1
  -7 -13  -7 664.089 56.3624   1
  13  -7   7 656.399 27.9531   1
  -7  -7 -13 701.494 54.8428   1
  -6 -13  -7 199.266 37.9995   1
  -7  -6 -13 169.084 33.4727   1
   6  13  -7 238.049 38.9369   1
  13  -7   6 166.618 18.1358   1
   5  13  -7 1744.70 81.9350   1
  -7  -5 -13 1703.87 81.4706   1
  -5 -13  -7 1646.39 88.8167   1
  -4 -13  -7 3981.39 146.843   1
   4  13  -7 3914.97 134.919   1
  -7  -4 -13 3994.34 134.453   1
  -3 -13  -7 4218.22 153.216   1
   3  13  -7 4317.82 140.100   1
  -7  -3 -13 4154.54 136.738   1
  -2 -13  -7 598.749 53.3040   1
   2  13  -7 622.859 46.1039   1
  -7  -2 -13 545.524 41.8671   1
  13   7  -1 11.0751 31.5486   1
  -7  -1 -13 52.5386 23.1732   1
   1  13  -7 40.8307 23.1249   1
  -1 -13  -7 3.67628 31.9195   1
  -7   0 -13 12.4549 19.8075   1
   0  13  -7-22.2754 26.4773   1
   0 -13  -7-7.16411 28.9124   1
  13   7   0 51.8086 31.2757   1
   1 -13  -7 38.3877 28.3417   1
  -7   1 -13 20.6417 18.6690   1
  13   7   1 40.4169 31.0574   1
  -1  13  -7 10.3096 24.7177   1
  -7   2 -13 576.148 35.1914   1
   2 -13  -7 565.533 48.7078   1
  -2  13  -7 508.294 36.6219   1
  13   7   2 568.312 52.1313   1
   3 -13  -7 4376.09 150.947   1
  13   7   3 4553.41 157.030   1
  -3  13  -7 4384.91 126.827   1
  -7   3 -13 4441.28 124.393   1
  -4  13  -7 4132.62 116.169   1
  -7   4 -13 4173.19 113.925   1
   4 -13  -7 3992.36 142.544   1
  13   7   4 3805.86 145.247   1
   5  13   7 1651.61 88.8772   1
  -7   5 -13 1725.06 56.2208   1
  13   7   5 1693.84 88.1174   1
   6  13   7 181.590 37.2821   1
  13   7   6 183.978 37.8087   1
  -7   6 -13 223.351 17.1113   1
   7  13   7 720.526 60.1205   1
  -7   7 -13 689.778 26.7864   1
  13   7   7 701.481 58.3688   1
   8  13   7 2430.16 112.754   1
  13   7   8 2562.05 112.669   1
  -7   8 -13 2485.61 63.9895   1
  13   7   9 996.128 72.7455   1
   9  13   7 1211.94 78.8011   1
  10  13   7 37.3905 34.1525   1
  13   7  10 24.3985 30.9986   1
  11  13   7 1664.76 95.3564   1
  13   7  11 1455.89 84.9122   1
  13   7  12 9883.12 282.879   1
  12  13   7 9080.37 290.972   1
  12  13  -8 9.15750 35.5974   1
 -13  -8 -12-4.00601 33.1055   1
  -8 -12 -13 37.0264 34.3082   1
 -13  -8 -11 7477.14 229.530   1
  -8 -11 -13 7542.34 237.836   1
  11  13  -8 7305.21 235.241   1
 -13  -8 -10 23.1851 32.3034   1
  -8 -10 -13 12.5930 33.8872   1
  10  13  -8 54.1174 36.5161   1
 -13  -8  -9 14343.3 380.948   1
   9  13  -8 14095.5 382.106   1
  -8  -9 -13 13745.2 381.651   1
  -8  -8 -13 7.60330 30.3156   1
 -13  -8  -8-41.2918 35.0408   1
   8  13  -8-18.7860 31.7565   1
   7  13  -8 46.1966 28.5438   1
  -8  -7 -13 46.6253 28.6322   1
 -13  -8  -7 18.4927 29.1581   1
  13  -8   7 73.6181 10.1386   1
   6  13  -8 3267.28 126.016   1
  13  -8   6 3508.70 93.0548   1
  -6 -13  -8 3245.43 133.948   1
  -8  -6 -13 3407.13 127.719   1
  -8  -5 -13 651.264 52.1595   1
   5  13  -8 725.697 53.6745   1
  -8  -4 -13 1018.25 59.8391   1
  -4 -13  -8 1051.26 69.6334   1
   4  13  -8 1004.91 60.0347   1
   3  13  -8 472.008 41.2547   1
  -3 -13  -8 499.250 50.9268   1
  -8  -3 -13 486.858 40.0769   1
  -2 -13  -8 5478.24 180.711   1
   2  13  -8 5480.54 163.294   1
  -8  -2 -13 5394.15 161.685   1
  13   8  -2 5083.69 177.565   1
  13   8  -1 18840.2 487.967   1
  -1 -13  -8 18782.1 486.156   1
  -8  -1 -13 19213.5 462.431   1
   1  13  -8 18432.3 462.469   1
  -8   0 -13 6.41526 20.1396   1
   0 -13  -8 11.0110 29.2659   1
   0  13  -8 8.82441 22.3707   1
  13   8   0-7.72260 29.6264   1
   1 -13  -8 19040.3 479.651   1
  -8   1 -13 18090.6 448.404   1
  13   8   1 18636.7 482.940   1
  -1  13  -8 18801.3 451.481   1
  -2  13  -8 5435.05 153.051   1
  -8   2 -13 5360.30 150.461   1
  13   8   2 5703.52 184.208   1
   2 -13  -8 5432.67 177.820   1
  13   8   3 427.351 48.1376   1
  -8   3 -13 515.780 31.2770   1
  -3  13  -8 464.822 31.7921   1
  -8   4 -13 1120.84 44.0549   1
  -4  13  -8 1062.13 44.7755   1
  13   8   4 1038.09 70.0707   1
  -8   5 -13 818.843 34.0578   1
  13   8   5 808.433 61.5665   1
  -8   6 -13 3362.10 88.9226   1
  13   8   6 3273.51 132.804   1
   6  13   8 3425.63 135.370   1
  -8   7 -13 69.2105 7.95919   1
   7  13   8 42.6413 31.1873   1
  13   8   7 33.5931 32.0365   1
   8  13   8-44.1564 36.0809   1
  13   8   9 14637.1 401.621   1
   9  13   8 14839.9 406.799   1
  10  13   8 61.2866 39.6386   1
  13   8  10 38.5289 35.3932   1
  11  13   8 7500.28 245.103   1
  13   8  11 7556.42 237.644   1
  12  13   8 25.4305 38.7719   1
  13   8  12 48.2566 35.2054   1
 -13  -9 -12 908.000 67.7124   1
 -12 -13  -9 917.983 72.2819   1
 -13  -9 -11 70.0919 35.0682   1
  -9 -11 -13 62.6555 36.5856   1
 -13  -9 -10 565.568 54.5427   1
  -9 -10 -13 551.044 55.9834   1
 -13  -9  -9 531.129 53.8779   1
  -9  -9 -13 452.860 52.4007   1
  -9  -8 -13 1895.68 94.2324   1
 -13  -9  -8 1811.72 93.5823   1
 -13  -9  -7 1349.54 78.8569   1
  -9  -7 -13 1443.39 78.9943   1
   7  13  -9 1325.93 74.2307   1
   6  13  -9 301.345 40.7953   1
  -9  -6 -13 297.326 39.2279   1
   5  13  -9 13343.2 357.345   1
  -9  -5 -13 13737.9 358.938   1
  -5 -13  -9 13546.6 374.504   1
  -9  -4 -13 36.0062 23.7908   1
  -4 -13  -9 53.7605 31.9507   1
   4  13  -9 26.9940 24.9409   1
  13   9  -3 2193.39 105.295   1
  -3 -13  -9 2471.47 109.149   1
   3  13  -9 2325.35 93.6229   1
  -9  -3 -13 2464.48 94.4552   1
  -2 -13  -9 15.9329 27.7876   1
  13   9  -2-24.2559 35.8165   1
  -9  -2 -13 2.57975 21.9228   1
   2  13  -9 26.0880 21.6824   1
   1  13  -9 59.9105 23.6355   1
  13   9  -1 137.446 35.5142   1
  -9  -1 -13 85.2438 23.6371   1
  -1 -13  -9 131.792 34.7439   1
   0 -13  -9-7.59483 28.3485   1
   0  13  -9 17.6851 21.1848   1
  -9   0 -13 8.61038 20.1830   1
  13   9   0-20.0906 31.6410   1
  -1  13  -9 74.2674 20.6506   1
  -9   1 -13 69.6418 19.9808   1
  13   9   1 101.306 34.4742   1
   1 -13  -9 60.1040 29.4386   1
  -9   2 -13-6.88321 18.6097   1
  -2  13  -9 3.64929 17.0316   1
  13   9   2-24.5000 31.5381   1
   2 -13  -9 7.43282 25.7159   1
  13   9   3 2354.32 109.290   1
  -3  13  -9 2447.79 79.9937   1
   3 -13  -9 2484.13 106.430   1
  -9   3 -13 2359.66 77.1447   1
  13   9   4 21.0356 32.2815   1
  -4  13  -9 8.20801 13.3917   1
  -9   4 -13 23.4442 13.4381   1
  13   9   5 13864.5 385.108   1
  -9   5 -13 14016.3 329.202   1
  13   9   6 282.019 47.3315   1
  -9   6 -13 332.692 16.8534   1
  13   9   7 1436.87 86.6130   1
   7  13   9 1425.57 85.1366   1
   8  13   9 1877.39 100.228   1
  13   9   8 1995.06 102.465   1
  13   9   9 472.332 54.9419   1
   9  13   9 408.452 53.7236   1
  10  13   9 575.676 62.8381   1
  13   9  10 602.241 57.1390   1
  13   9  11 82.0713 36.6645   1
  11  13   9 158.788 45.9656   1
  12  13   9 1081.65 82.4960   1
  13   9  12 1244.56 79.9760   1
 -10 -12 -13 114.125 41.7510   1
 -12 -13 -10 33.8290 40.4391   1
 -13 -10 -12 124.280 39.7626   1
 -13 -10 -11-26.0349 35.6518   1
 -10 -11 -13-13.6282 38.6043   1
 -11 -13 -10 4.72431 35.2692   1
 -13 -10 -10 980.512 70.1226   1
 -10 -10 -13 965.692 69.4812   1
 -10  -9 -13 1036.55 69.6100   1
 -13 -10  -9 1000.26 71.6029   1
 -13 -10  -8 506.966 53.9880   1
 -10  -8 -13 573.336 53.6605   1
 -10  -7 -13 6847.42 212.320   1
 -13 -10  -7 6832.38 218.663   1
 -10  -6 -13 59.1967 29.9397   1
 -10  -5 -13 101.347 29.1962   1
  13  10  -4 122.543 37.1109   1
  -4 -13 -10 63.9991 31.4583   1
 -10  -4 -13 88.6550 28.4715   1
   4  13 -10 81.6391 27.5175   1
  13  10  -3 134.918 36.1118   1
 -10  -3 -13 88.0269 25.4102   1
  -3 -13 -10 87.3781 31.1653   1
   3  13 -10 155.545 28.4608   1
 -10  -2 -13 230.824 29.7481   1
   2  13 -10 295.336 32.4394   1
  -2 -13 -10 265.571 41.1792   1
  13  10  -2 214.994 39.5734   1
   1  13 -10 4326.58 139.477   1
 -10  -1 -13 4533.89 140.652   1
  13  10  -1 4568.14 163.760   1
  -1 -13 -10 4821.43 164.383   1
  13  10   0 4.23137 30.2247   1
   0  13 -10-19.9100 20.6503   1
   0 -13 -10-3.94148 27.0497   1
 -10   0 -13-6.55136 18.2536   1
  -1  13 -10 4562.86 136.799   1
  13  10   1 4927.62 170.040   1
 -10   1 -13 4596.25 135.546   1
   1 -13 -10 4643.08 162.481   1
 -10   2 -13 211.369 22.9121   1
   2 -13 -10 224.186 37.7912   1
  -2  13 -10 229.566 24.5584   1
 -10   3 -13 120.787 18.6410   1
  13  10   3 91.3519 33.6981   1
  -3  13 -10 119.747 20.2707   1
  -4  13 -10 90.6656 17.6210   1
 -10   4 -13 84.5417 16.3397   1
 -10   5 -13 91.9039 13.4750   1
  13  10   5 116.240 39.0673   1
  13  10   6-22.8414 45.7927   1
  13  10   7 6667.61 221.040   1
  13  10   8 498.789 56.7905   1
   8  13  10 487.368 56.8544   1
  13  10   9 936.573 72.3286   1
   9  13  10 929.673 72.4835   1
  10  13  10 899.808 73.2840   1
  13  10  10 1049.31 76.8638   1
  13  10  11 9.54470 36.3718   1
  11  13  10-25.0941 42.1832   1
  12  13  10 51.8329 41.8633   1
  13  10  12 82.1869 39.0502   1
 -11 -12 -13 3854.16 153.409   1
 -12 -13 -11 3581.57 150.280   1
 -13 -11 -12 3577.42 147.589   1
 -11 -13 -11 2925.04 130.103   1
 -11 -11 -13 2837.43 127.302   1
 -13 -11 -11 2795.44 126.358   1
 -13 -11 -10 564.636 58.3892   1
 -11 -10 -13 584.804 57.7272   1
 -10 -13 -11 652.286 61.8516   1
 -13 -11  -9 1745.00 96.3735   1
 -11  -9 -13 1674.28 90.5287   1
 -13 -11  -8 4745.83 172.612   1
 -11  -8 -13 4722.85 166.367   1
 -11  -7 -13 149.103 37.8270   1
 -13 -11  -7 177.344 40.8966   1
 -13 -11  -6-8.56727 34.9925   1
 -11  -6 -13-14.0610 30.3587   1
  13 -11   6 29.5867 9.43173   1
 -11  -5 -13 6614.42 201.189   1
 -11  -4 -13 1336.96 71.5241   1
  13  11  -4 1361.90 81.6980   1
  13  11  -3 8370.74 261.440   1
  -3 -13 -11 8417.54 261.798   1
 -11  -3 -13 8834.61 241.807   1
 -11  -2 -13 1594.28 72.3977   1
  13  11  -2 1603.56 89.3779   1
   2  13 -11 1613.34 71.8020   1
  -2 -13 -11 1565.42 86.4536   1
 -11  -1 -13 111.547 24.2088   1
   1  13 -11 93.6489 23.3066   1
  13  11  -1 78.9738 31.6500   1
  -1 -13 -11 86.1529 31.7571   1
   0 -13 -11-8.13591 26.7286   1
   0  13 -11 9.03999 18.5688   1
 -11   0 -13-8.78841 17.7344   1
  13  11   0-35.1516 33.9374   1
  -1  13 -11 111.577 21.7046   1
  13  11   1 79.6396 36.0083   1
 -11   1 -13 119.405 21.5188   1
   1 -13 -11 104.533 30.7379   1
   2 -13 -11 1598.22 85.1596   1
  13  11   2 1536.77 87.6895   1
 -11   2 -13 1459.52 59.4895   1
  -2  13 -11 1581.48 61.8322   1
  13  11   3 8705.53 266.657   1
  -3  13 -11 8497.58 220.643   1
 -11   3 -13 8745.36 218.712   1
  -4  13 -11 1433.71 53.1542   1
 -11   4 -13 1358.16 49.8811   1
  13  11   5 6867.88 226.923   1
  13  11   6-23.8540 40.1017   1
  13  11   7 154.715 43.3981   1
  13  11   8 5081.57 186.083   1
  13  11   9 1589.47 95.2157   1
  13  11  10 502.039 59.8415   1
  10  13  11 634.423 63.3797   1
  13  11  11 2788.99 130.107   1
  11  13  11 2867.35 132.519   1
  13  11  12 3609.78 151.284   1
  12  13  11 3554.83 153.249   1
 -13 -12 -12 6576.11 221.067   1
 -12 -12 -13 6274.75 217.604   1
 -12 -13 -12 6554.62 222.313   1
 -11 -13 -12 1942.15 105.653   1
 -12 -11 -13 1846.50 100.523   1
 -13 -12 -11 1971.52 106.618   1
 -12 -10 -13 2373.55 111.578   1
 -13 -12 -10 2229.84 112.280   1
 -10 -13 -12 2218.33 115.005   1
 -13 -12  -9-4.66585 34.8345   1
 -12  -9 -13 54.7014 33.1377   1
  -9 -13 -12 14.3991 37.0736   1
 -13 -12  -8 1670.09 95.2180   1
 -12  -8 -13 1778.56 92.2803   1
 -12  -7 -13 260.922 41.8802   1
 -13 -12  -7 377.213 48.4771   1
 -12  -6 -13 1284.19 73.8006   1
  13 -12   6 1211.27 39.2426   1
 -12  -5 -13 201.469 35.4048   1
  13 -12   5 220.911 18.8358   1
 -12  -4 -13 2758.04 106.975   1
 -12  -3 -13 230.427 34.6653   1
  13  12  -3 308.743 46.9178   1
  13  12  -2 3768.13 147.993   1
  -2 -13 -12 3810.67 147.622   1
 -12  -2 -13 3653.47 125.111   1
  -1 -13 -12 543.513 55.2767   1
 -12  -1 -13 614.970 43.4841   1
  13  12  -1 647.223 60.1756   1
   1  13 -12 687.605 44.3654   1
   0  13 -12 22.9528 19.5054   1
 -12   0 -13 13.4070 17.1451   1
  13  12   0-18.3519 32.5183   1
 -12   1 -13 679.482 40.1702   1
  -1  13 -12 637.407 40.6570   1
  13  12   1 569.728 57.1002   1
   1 -13 -12 717.744 58.1664   1
  13  12   2 3646.54 148.940   1
 -12   2 -13 3747.92 112.563   1
   2 -13 -12 3643.44 142.030   1
  -2  13 -12 3770.43 114.061   1
  -3  13 -12 231.999 24.8379   1
  13  12   3 219.470 44.2239   1
  13  12   4 2838.04 125.821   1
  -4  13 -12 2545.72 80.7254   1
  13  12   5 186.578 43.0440   1
  13  12   6 1050.78 79.6367   1
  -6  13 -12 1204.05 36.8156   1
  13  12   7 438.317 56.2468   1
  13  12   8 1802.85 102.132   1
  13  12   9 5.08629 42.7500   1
  13  12  10 2002.62 110.534   1
  13  12  11 1828.38 106.589   1
  13  12  12 6398.34 224.999   1
  12  13  12 6503.89 227.711   1
 -13 -13 -13 107.975 48.9092   1
 -13 -13 -12 1355.11 91.5922   1
 -12 -13 -13 1374.11 92.5021   1
 -13 -12 -13 1370.64 90.0144   1
 -13 -13 -11 1069.79 81.2630   1
 -13 -11 -13 1219.25 81.5980   1
 -11 -13 -13 1161.63 84.3493   1
 -13 -13 -10-29.4395 44.3325   1
 -13 -10 -13-4.49637 36.9439   1
 -10 -13 -13-14.8583 43.8806   1
 -13 -13  -9 1902.93 105.668   1
 -13  -9 -13 2021.91 101.431   1
  -9 -13 -13 1987.85 106.942   1
  -8 -13 -13 286.421 50.2868   1
 -13 -13  -8 313.741 50.1849   1
 -13  -8 -13 191.233 39.8852   1
 -13  -7 -13 42.4507 34.7124   1
 -13  -6 -13 2695.42 112.990   1
  13 -13   6 2681.14 73.7633   1
  13 -13   5 244.654 21.7204   1
 -13  -5 -13 220.076 38.4222   1
 -13  -4 -13 401.498 42.3869   1
  13 -13   4 371.108 28.1040   1
 -13  -3 -13 232.198 34.4737   1
 -13  -2 -13 764.949 51.6861   1
  13  13  -2 822.199 69.1033   1
  13  13  -1 1301.69 83.8748   1
 -13  -1 -13 1386.96 65.6269   1
  -1 -13 -13 1331.32 82.4635   1
   0 -13 -13-8.68362 30.7768   1
  13  13   0-28.6463 36.1433   1
 -13   0 -13-23.0393 22.0838   1
  -1  13 -13 1360.18 61.4089   1
  13  13   1 1501.02 90.2539   1
 -13   1 -13 1463.96 61.5921   1
   1 -13 -13 1363.29 82.5753   1
  -2  13 -13 770.897 44.0344   1
  13  13   2 874.349 72.7939   1
   2 -13 -13 810.984 64.7898   1
  -3  13 -13 184.880 23.6438   1
  13  13   3 270.045 48.5383   1
  -4  13 -13 351.145 26.6145   1
  13  13   4 382.141 54.5935   1
  13  13   5 123.009 45.4915   1
  13  13   6 2659.48 129.805   1
  -6  13 -13 2717.53 71.5837   1
  13  13   7 57.4725 42.9329   1
  13   7  13 17.1068 33.6850   1
  13   8  13 238.806 45.3331   1
  13  13   8 268.915 55.1623   1
  13   9  13 2095.74 106.745   1
  13  13   9 1804.11 106.939   1
  13  10  13 34.6895 39.7680   1
  13  13  10 48.1742 44.7475   1
  13  11  13 1159.04 83.8026   1
  13  13  11 1020.63 85.7014   1
  13  13  12 1427.20 96.9039   1
  13  12  13 1434.62 96.3482   1
  13  13  13 134.783 51.0720   1
   0  14   0 3332.07 115.473   1
   0 -14   0 3147.07 116.607   1
   1 -14   0 17.7496 21.2926   1
  -1 -14   0 6.25314 21.2771   1
  -1  14   0 18.6192 20.5441   1
   1  14   0-17.6313 19.1315   1
   2  14   0 3919.72 134.097   1
  -2 -14   0 3857.44 135.664   1
   2 -14   0 3795.35 129.599   1
  -3 -14   0 3.34663 21.5854   1
   3 -14   0-11.1505 22.6353   1
   3  14   0 29.6578 26.4373   1
   4  14   0 5031.79 165.413   1
  -4 -14   0 4780.95 162.448   1
  14   0   4 4943.12 152.233   1
   4 -14   0 4882.58 153.689   1
  -5 -14   0-10.8796 27.2627   1
  14   0   5 18.4131 23.0703   1
   5 -14   0-2.66187 22.1228   1
   5  14   0-3.63347 27.6917   1
  14   0   6 13047.7 347.218   1
  -6 -14   0 14022.1 368.684   1
   6 -14   0 13807.0 348.977   1
   7 -14   0 22.6351 18.7751   1
  14   0   7-29.0802 24.5648   1
  -7 -14   0-3.87464 35.0075   1
   8 -14   0 8363.58 225.298   1
  14   0   8 7938.42 225.903   1
   9 -14   0-9.85224 21.2692   1
  14   0   9 5.33221 19.3343   1
  14   0  10 31.4839 21.5784   1
  10 -14   0 54.7685 19.8744   1
  14   0  11-5.19567 19.6649   1
  12  14   0 90.9915 36.8375   1
  14   0  12 131.623 27.0240   1
  13  14   0-24.8983 38.9671   1
   0 -13 -14-22.4049 34.3848   1
  13  14  -1 4799.52 183.369   1
 -14  -1 -13 5062.03 153.500   1
  11 -14   1 2.31555 17.5289   1
  14  -1  11 16.2767 18.6556   1
  10 -14   1 761.414 44.9805   1
  14  -1  10 792.575 46.4529   1
   9 -14   1 106.258 21.8509   1
  14  -1   9 161.907 25.4067   1
   8 -14   1 7.00693 18.6259   1
  -8 -14  -1-8.11392 33.7187   1
  14  -1   8 31.4734 19.1872   1
  -7 -14  -1 8982.71 264.978   1
   7 -14   1 9315.94 242.788   1
  14  -1   7 8662.60 241.357   1
  14  -1   6 3608.12 119.257   1
   6  14  -1 3650.93 137.756   1
   6 -14   1 3724.88 120.898   1
  -6 -14  -1 3469.67 135.577   1
   5  14  -1 11031.9 306.219   1
  14  -1   5 11411.1 288.508   1
  -5 -14  -1 10693.2 306.363   1
   5 -14   1 10852.7 289.073   1
   4  14  -1 207.833 34.6733   1
   4 -14   1 208.922 29.0976   1
  -4 -14  -1 301.740 39.4967   1
  14  -1   4 235.997 29.7355   1
   3 -14   1 2684.60 100.015   1
   3  14  -1 2684.69 107.701   1
  -3 -14  -1 2804.89 110.009   1
  -2 -14  -1 351.469 39.0645   1
   2  14  -1 395.657 39.4865   1
   2 -14   1 361.849 35.0659   1
   1  14  -1 1359.76 68.3149   1
  -1 -14  -1 1416.04 72.8797   1
   1 -14   1 1329.12 66.0896   1
   0 -14   1 227.822 30.0235   1
   0  14   1 199.228 29.1329   1
   0  14  -1 200.630 29.5357   1
   0 -14  -1 268.002 34.1094   1
   1  14   1 1409.30 71.3889   1
   1 -14  -1 1522.26 72.8457   1
  -1  14  -1 1482.51 66.8854   1
  -1 -14   1 1335.69 69.3324   1
   2  14   1 392.909 40.1321   1
  -2 -14   1 436.751 41.1516   1
   2 -14  -1 337.719 37.1199   1
  -3 -14   1 2875.08 111.103   1
   3  14   1 2545.40 106.706   1
   3 -14  -1 2754.64 104.675   1
  14   1   3 2863.89 104.030   1
   4 -14  -1 200.084 29.3518   1
  14   1   4 217.719 31.8289   1
  -4 -14   1 305.566 37.1309   1
   4  14   1 253.483 37.4114   1
  14   1   5 10942.4 292.661   1
   5 -14  -1 11196.6 293.025   1
  -5 -14   1 10677.7 302.902   1
  14   1   6 3657.64 126.709   1
   6 -14  -1 3761.69 125.024   1
  14   1   7 8961.29 247.594   1
   7 -14  -1 8879.57 244.004   1
  14   1   8 31.6908 21.9598   1
   8 -14  -1 2.63470 22.0241   1
  14   1   9 142.344 29.3134   1
   9 -14  -1 159.350 26.9372   1
  14   1  10 702.241 48.8280   1
  14   1  11 2.85925 22.0844   1
  11  14   1-28.1679 34.7993   1
  14   1  12 43.1927 25.3888   1
   1 -12 -14 8.66226 31.8785   1
  12  14   1 4.87290 34.8102   1
   1 -13 -14 5068.65 181.714   1
  13  14   1 5134.73 189.667   1
 -14  -2 -13 11449.2 304.274   1
 -14  -2 -12 373.070 39.2730   1
  12 -14   2 420.374 33.6765   1
  11 -14   2 4207.76 130.578   1
  14  -2  11 4439.53 130.614   1
  14  -2  10 2860.35 98.2177   1
  10 -14   2 3064.44 99.7037   1
   9 -14   2 2505.25 88.6707   1
  14  -2   9 2480.24 89.1777   1
  -9 -14  -2 2518.63 112.979   1
  -2  -8 -14 43.0859 25.0496   1
   8 -14   2 24.1067 17.5851   1
  14  -2   8 24.0677 17.7693   1
  -7 -14  -2 614.332 57.7028   1
   7 -14   2 741.912 44.5340   1
   7  14  -2 692.974 57.5876   1
  14  -2   7 713.650 44.1422   1
   6  14  -2 299.715 42.8998   1
  14  -2   6 366.652 33.8081   1
   6 -14   2 388.758 33.2954   1
  -6 -14  -2 257.253 43.1618   1
   5  14  -2 3544.18 134.901   1
  -5 -14  -2 3653.04 138.420   1
   5 -14   2 3814.57 122.519   1
  14  -2   5 3847.96 120.810   1
  14  -2   4 169.218 26.9738   1
   4  14  -2 116.245 32.1291   1
  -4 -14  -2 140.833 33.0988   1
   4 -14   2 146.712 26.3774   1
   3  14  -2 2223.79 93.0465   1
  -3 -14  -2 2016.59 93.8649   1
   3 -14   2 2104.34 83.5210   1
   2 -14   2 871.393 50.9553   1
   2  14  -2 838.577 54.2083   1
  -2 -14  -2 851.104 58.7677   1
   1 -14   2 73.3897 21.8273   1
   1  14  -2 36.8862 21.2029   1
  -1 -14  -2 13.3886 23.5564   1
   0  14   2 10354.0 283.892   1
   0 -14   2 10315.6 280.477   1
   0 -14  -2 10777.7 290.048   1
   0  14  -2 10181.1 277.188   1
   1 -14  -2 57.3628 25.1225   1
  -1  14  -2 49.7576 22.4008   1
  -1 -14   2 80.1980 23.7133   1
   1  14   2 24.8221 23.8355   1
  14   2   2 809.197 54.0367   1
  -2 -14   2 908.431 55.5758   1
   2  14   2 829.723 56.0211   1
   2 -14  -2 807.068 55.9159   1
  -2  14  -2 823.500 47.8070   1
  -3 -14   2 2090.34 91.4893   1
  14   2   3 2277.20 92.1711   1
   3 -14  -2 2124.51 90.5727   1
   3  14   2 2063.09 93.3240   1
  14   2   4 173.448 30.7217   1
   4 -14  -2 199.163 30.8799   1
   5 -14  -2 3857.74 129.313   1
  14   2   5 3613.07 128.658   1
  14   2   6 338.994 38.0457   1
   6 -14  -2 312.532 35.7122   1
   7 -14  -2 762.018 48.5043   1
  14   2   7 692.077 51.0974   1
   8 -14  -2 8.45285 20.1338   1
  14   2   8 56.0147 25.1242   1
  14   2   9 2340.51 96.0772   1
  14   2  10 3077.26 115.729   1
  10  14   2 3121.68 132.608   1
  14   2  11 4223.22 141.838   1
  11  14   2 4057.46 160.453   1
  12  14   2 357.132 52.0294   1
  14   2  12 348.048 39.8669   1
  13  14   2 11277.8 331.319   1
  -2  13 -14 10957.9 280.616   1
  13 -14   3 594.210 37.7572   1
 -14  -3 -13 560.742 47.7069   1
 -14  -3 -12 125.908 31.6140   1
  12 -14   3 85.4712 22.1146   1
  11 -14   3 1851.95 69.3060   1
 -14  -3 -11 1720.64 80.5406   1
  10 -14   3 328.284 29.0192   1
  14  -3  10 299.304 27.7044   1
 -10 -14  -3 255.688 40.7718   1
   9 -14   3 987.105 47.9921   1
  -9 -14  -3 893.653 66.7648   1
   9  14  -3 900.504 66.2149   1
  -3  -9 -14 888.865 62.7155   1
  14  -3   9 924.893 46.3476   1
  -8 -14  -3 4.17031 34.2687   1
   8 -14   3 42.3367 17.4195   1
  -3  -8 -14-10.7366 28.1885   1
  14  -3   8 37.0543 16.4935   1
   8  14  -3 27.4860 30.3333   1
  -3  -7 -14 9890.11 277.925   1
  -7 -14  -3 10269.1 289.193   1
   7  14  -3 9852.34 283.098   1
   7 -14   3 9530.08 255.610   1
  14  -3   7 10031.5 255.593   1
  14  -3   6 3663.01 116.695   1
  -3  -6 -14 3774.12 134.244   1
   6  14  -3 3839.51 139.609   1
  -6 -14  -3 3802.06 142.864   1
   6 -14   3 3763.92 118.974   1
  -5 -14  -3 531.805 53.5204   1
   5 -14   3 440.798 38.2087   1
   5  14  -3 519.582 49.9544   1
  14  -3   5 603.068 39.7022   1
   4  14  -3 3549.79 128.409   1
   4 -14   3 3498.94 114.029   1
  -4 -14  -3 3271.23 129.675   1
   3  14  -3 1545.07 77.6187   1
   3 -14   3 1672.00 71.2809   1
  -2 -14  -3 109.688 31.2901   1
   2 -14   3 122.235 23.2080   1
   2  14  -3 100.352 25.2047   1
   1  14  -3 75.6301 25.6274   1
   1 -14   3 86.6978 23.7058   1
  -1 -14  -3 110.934 29.6854   1
   0  14  -3 635.095 44.6846   1
   0 -14   3 735.836 47.1472   1
   0 -14  -3 604.610 50.7136   1
   1 -14  -3 23.2267 30.0273   1
  -1 -14   3 86.5533 23.3490   1
   1  14   3 83.9483 26.1164   1
  -1  14  -3 98.6867 22.9316   1
  -2 -14   3 127.142 26.7842   1
  -2  14  -3 125.504 23.7722   1
  14   3   2 57.4887 29.0858   1
   2 -14  -3 74.4100 29.0392   1
   2  14   3 116.441 29.4173   1
  -3  14  -3 1574.34 66.9819   1
   3 -14  -3 1741.97 80.3427   1
  14   3   3 1711.76 81.6444   1
   4 -14  -3 3657.96 128.730   1
  14   3   4 3626.00 129.874   1
  14   3   5 546.404 48.5449   1
   5 -14  -3 561.596 47.1999   1
   6 -14  -3 3951.56 133.214   1
  14   3   6 3737.50 134.808   1
  14   3   7 9707.88 274.522   1
   7 -14  -3 9894.25 269.744   1
  14   3   8 93.6586 28.1915   1
   9  14   3 814.657 66.0419   1
  14   3   9 935.429 59.8806   1
  10  14   3 223.722 44.6926   1
  14   3  10 309.704 40.4674   1
  14   3  11 1980.45 88.6013   1
  11  14   3 1664.14 97.7605   1
  12  14   3 164.567 44.4650   1
  -3  12 -14 88.7441 20.5208   1
  14   3  12 121.300 35.1477   1
  13  14   3 459.927 60.0327   1
  -3  13 -14 512.880 35.1378   1
 -14  -4 -13 519.422 49.6546   1
  13 -14   4 539.133 34.5106   1
 -14  -4 -12 1052.41 65.5517   1
  12 -14   4 1121.02 49.3951   1
 -11 -14  -4 407.722 50.2693   1
 -14  -4 -11 388.272 41.6013   1
  11 -14   4 370.981 28.9882   1
  10 -14   4 3473.27 102.359   1
 -14  -4 -10 3091.43 117.838   1
  -4 -10 -14 3295.11 131.376   1
 -10 -14  -4 2938.30 131.747   1
  14  -4  10 3317.57 97.7552   1
  10  14  -4 3169.01 133.126   1
   9 -14   4 204.982 23.5544   1
  14  -4   9 240.185 24.1119   1
  -9 -14  -4 321.785 43.5511   1
   9  14  -4 208.487 38.6749   1
  -4  -9 -14 233.327 38.9813   1
  -8 -14  -4 37.6940 31.9288   1
  -4  -8 -14-7.26273 30.7000   1
  14  -4   8 73.4414 19.5107   1
   8  14  -4 42.8570 30.2988   1
   8 -14   4 19.7143 19.2666   1
  14  -4   7 1104.28 50.5827   1
   7 -14   4 1105.71 51.8037   1
  -7 -14  -4 1158.86 74.9653   1
   7  14  -4 1126.70 71.0506   1
  -4  -7 -14 1059.21 66.1230   1
  14  -4   6 21049.2 505.373   1
  -6 -14  -4 21326.7 543.190   1
   6 -14   4 20930.7 507.086   1
   6  14  -4 21390.6 536.022   1
  -4  -6 -14 21442.1 529.945   1
  14  -4   5 858.672 46.5377   1
   5  14  -4 775.515 59.3268   1
   5 -14   4 752.375 46.1028   1
  -5 -14  -4 831.724 64.3413   1
  -4  -5 -14 902.701 58.7453   1
  -4 -14  -4 19602.7 504.918   1
  -4  -4 -14 19986.1 491.136   1
   4  14  -4 19383.3 495.551   1
   4 -14   4 19607.3 476.745   1
   3  14  -4 1240.67 70.0575   1
   3 -14   4 1392.03 62.9674   1
  -3 -14  -4 1225.81 76.2870   1
   2 -14   4 845.815 49.9862   1
  -2 -14  -4 964.067 63.6382   1
   2  14  -4 956.682 58.9897   1
   1 -14   4 661.258 44.9099   1
   1  14  -4 761.625 49.1106   1
  -1 -14  -4 736.924 56.1098   1
   0 -14  -4 1655.70 84.6631   1
   0  14  -4 1799.82 75.2543   1
   1 -14  -4 683.937 54.6171   1
  -1  14  -4 696.116 45.0144   1
  -2  14  -4 858.566 47.4000   1
  14   4   2 774.880 58.4057   1
   2 -14  -4 857.236 58.6161   1
  14   4   3 1341.74 74.6346   1
  -3  14  -4 1259.78 58.0559   1
   3 -14  -4 1339.16 73.4710   1
   4 -14  -4 19971.9 493.810   1
  14   4   4 19082.4 493.758   1
   5 -14  -4 766.890 57.7641   1
  14   4   5 801.332 60.5173   1
  14   4   6 21322.8 535.469   1
   6 -14  -4 21187.5 529.797   1
  14   4   7 1298.01 76.6192   1
  14   4   8 110.517 30.3510   1
   8  14   4 43.7376 35.7728   1
  14   4   9 319.925 39.5467   1
   9  14   4 260.160 43.0998   1
  14   4  10 3308.84 126.590   1
  10  14   4 3210.02 137.323   1
  11  14   4 402.297 54.2121   1
  14   4  11 344.855 44.6290   1
  -4  12 -14 1165.55 47.2645   1
  14   4  12 1206.10 71.2217   1
  -4  13 -14 525.726 33.8304   1
  14   4  13 636.332 56.9061   1
  13  14   4 467.666 62.9180   1
 -14  -5 -13 5778.84 183.457   1
  13 -14   5 5604.45 149.775   1
 -14  -5 -12 62.0116 34.1668   1
  12 -14   5 80.4310 18.7876   1
 -14  -5 -11 4311.94 144.987   1
  -5 -11 -14 4102.75 156.131   1
  11 -14   5 4136.81 114.640   1
 -14  -5 -10 1144.15 65.2289   1
  10  14  -5 1073.47 73.6782   1
  -5 -10 -14 1027.93 71.0891   1
  10 -14   5 1065.71 44.8217   1
 -10 -14  -5 1157.44 77.2069   1
  -5  -9 -14 6469.55 209.163   1
  14  -5   9 6431.48 168.392   1
  -9 -14  -5 6380.70 214.538   1
   9 -14   5 6741.35 172.250   1
   9  14  -5 6656.14 211.486   1
  14  -5   8 92.9645 18.2660   1
  -5  -8 -14 73.4766 31.4535   1
  -8 -14  -5 55.7499 30.9322   1
   8 -14   5 110.518 19.2899   1
   8  14  -5 81.9469 33.0414   1
   7  14  -5 12853.2 352.193   1
  -5  -7 -14 13444.1 351.347   1
   7 -14   5 12938.1 318.279   1
  14  -5   7 12858.8 316.346   1
  -7 -14  -5 12682.3 358.231   1
  -5  -6 -14 269.253 39.6355   1
   6  14  -5 235.283 41.8917   1
   6 -14   5 188.758 24.4482   1
  -6 -14  -5 251.863 42.6936   1
  14  -5   6 190.853 25.4372   1
   5  14  -5 296.563 43.9738   1
   5 -14   5 269.458 30.1075   1
  -5  -5 -14 305.364 39.7599   1
  -5 -14  -5 326.225 46.6827   1
  -4 -14  -5 183.883 41.3493   1
   4  14  -5 189.740 37.1683   1
  -5  -4 -14 187.839 34.0036   1
   4 -14   5 162.577 26.7303   1
   3  14  -5 7672.17 221.686   1
  -5  -3 -14 7643.46 216.067   1
  -3 -14  -5 7549.87 233.191   1
  -5  -2 -14 2734.51 100.387   1
  -2 -14  -5 2914.24 116.717   1
   2  14  -5 2735.85 104.161   1
  -5  -1 -14 1962.86 78.1218   1
   1  14  -5 1845.43 79.6754   1
  -1 -14  -5 1941.93 91.6641   1
   0  14  -5 2822.18 100.939   1
   0 -14  -5 2726.51 112.674   1
   1 -14  -5 1814.66 87.8933   1
  -1  14  -5 2040.96 78.5935   1
  14   5   1 1898.30 90.1887   1
  -2  14  -5 2944.85 98.8121   1
   2 -14  -5 2718.81 112.713   1
  14   5   2 2961.65 116.896   1
   3 -14  -5 7517.52 223.798   1
  -3  14  -5 7757.30 203.273   1
  14   5   3 7259.38 226.220   1
   4 -14  -5 222.230 37.7057   1
  14   5   4 203.499 43.0537   1
   5 -14  -5 295.475 43.3905   1
  14   5   5 259.560 44.4586   1
   6 -14  -5 234.373 37.5182   1
  14   5   6 183.481 39.8290   1
   7  14   5 12471.5 347.312   1
  14   5   7 12269.9 338.788   1
   8  14   5 57.6775 31.5119   1
  14   5   8 132.390 34.7249   1
  14   5   9 6442.71 206.417   1
   9  14   5 6660.01 218.100   1
  10  14   5 1122.53 78.5789   1
  14   5  10 1145.15 71.1460   1
  14   5  11 4042.78 149.443   1
  11  14   5 4287.18 166.218   1
  14   5  12 50.1343 34.6983   1
  12  14   5 67.1613 44.8636   1
  13  14   5 5865.51 212.186   1
  14   5  13 5863.55 193.814   1
 -14  -6 -13 6142.43 193.583   1
  13 -14   6 5888.64 147.914   1
  12 -14   6 1999.73 61.1453   1
  -6 -12 -14 2171.74 107.902   1
 -14  -6 -12 2031.31 96.3428   1
  12  14  -6 2153.64 109.051   1
 -14  -6 -11 5238.21 175.843   1
  -6 -11 -14 5276.90 186.717   1
  11  14  -6 5271.24 188.717   1
  11 -14   6 5411.90 136.507   1
  10 -14   6 435.547 24.8885   1
  10  14  -6 407.240 54.1677   1
 -14  -6 -10 509.344 48.1858   1
  -6 -10 -14 354.357 49.1064   1
   9 -14   6 2743.09 79.0139   1
  -9 -14  -6 2431.74 115.145   1
   9  14  -6 2626.36 116.096   1
 -14  -6  -9 2681.07 110.578   1
  14  -6   9 2597.29 74.9429   1
  -6  -9 -14 2779.86 118.309   1
  -6  -8 -14 45.4733 30.7717   1
   8 -14   6 28.0373 14.5509   1
   8  14  -6-7.72426 30.7968   1
  -8 -14  -6-21.6983 31.4723   1
  14  -6   8 10.5672 13.6860   1
  14  -6   7 1987.07 66.3697   1
  -7 -14  -6 2010.35 100.228   1
   7  14  -6 1985.31 94.5748   1
  -6  -7 -14 1987.54 92.9274   1
  -6  -6 -14 8456.37 243.746   1
   6  14  -6 8313.80 245.297   1
  -6 -14  -6 8464.03 255.656   1
  14  -6   6 8323.95 213.597   1
  -5 -14  -6 996.911 70.9905   1
   5  14  -6 948.230 63.8744   1
  -6  -5 -14 1009.96 62.3640   1
  -4 -14  -6 12775.5 355.088   1
   4  14  -6 13129.7 342.980   1
  -6  -4 -14 12696.1 338.020   1
   3  14  -6 593.827 46.2042   1
  -6  -3 -14 559.579 44.5721   1
  -3 -14  -6 553.682 54.4953   1
  -2 -14  -6 2350.19 104.674   1
   2  14  -6 2286.85 91.8073   1
  -6  -2 -14 2126.51 86.1063   1
  -6  -1 -14 982.914 53.1594   1
   1  14  -6 1051.35 57.1930   1
  -1 -14  -6 947.232 65.8334   1
  14   6   0 126.454 32.3643   1
   0 -14  -6 140.834 32.7487   1
   0  14  -6 58.9243 23.1309   1
  -6   0 -14 113.162 24.4925   1
  -6   1 -14 1004.06 49.8940   1
   1 -14  -6 1049.05 65.9725   1
  -1  14  -6 895.741 50.3326   1
  14   6   1 941.348 64.9651   1
  14   6   2 2005.86 96.8029   1
  -6   2 -14 2178.52 77.0318   1
   2 -14  -6 2148.87 96.5767   1
  -2  14  -6 2202.00 80.7111   1
  -3  14  -6 529.003 36.4450   1
   3 -14  -6 495.946 49.1215   1
  14   6   3 607.854 53.4953   1
  -4  14  -6 12946.9 313.938   1
  14   6   4 12713.2 347.438   1
   4 -14  -6 12294.0 340.746   1
   5 -14  -6 1100.25 67.3084   1
  14   6   5 944.793 68.9062   1
   6  14   6 8242.51 252.509   1
  14   6   6 8383.40 249.881   1
  14   6   7 2028.40 99.5557   1
   7  14   6 2210.86 104.661   1
  14   6   8 36.0892 35.0005   1
   8  14   6 44.5707 36.2021   1
   9  14   6 2867.94 126.516   1
  14   6   9 2850.24 121.546   1
  -6  10 -14 404.686 21.1234   1
  10  14   6 373.262 52.4974   1
  14   6  10 436.645 51.3294   1
  14   6  11 5223.13 178.041   1
  11  14   6 5148.50 190.612   1
  -6  11 -14 5162.22 128.245   1
  14   6  12 2097.76 102.947   1
  12  14   6 2157.86 114.753   1
  -6  12 -14 1960.26 56.5450   1
  13  14   6 6127.07 214.420   1
  14   6  13 6077.96 198.071   1
  -6  13 -14 5740.54 142.141   1
  13  14  -7 898.374 72.5721   1
  -7 -13 -14 794.957 72.4297   1
  -7 -12 -14 84.5956 42.0664   1
 -14  -7 -12 54.2325 36.1747   1
  12  14  -7 14.1907 38.4247   1
  11  14  -7 1503.64 88.9590   1
 -14  -7 -11 1571.37 84.9861   1
  -7 -11 -14 1535.39 90.8171   1
 -14  -7 -10 6924.73 211.673   1
  10  14  -7 6630.27 217.473   1
  -7 -10 -14 6528.86 217.498   1
 -14  -7  -9 18.4721 29.6398   1
   9  14  -7 4.10490 31.7052   1
  -7  -9 -14 4.07439 31.8809   1
  14  -7   8 1996.33 58.5355   1
  -7  -8 -14 2123.17 98.1572   1
  -8 -14  -7 1858.52 98.7407   1
   8  14  -7 1805.96 92.6192   1
  14  -7   7 3189.33 90.4376   1
  -7 -14  -7 3223.48 132.965   1
  -7  -7 -14 3370.44 127.043   1
   7  14  -7 3115.49 124.912   1
   6  14  -7 4467.92 154.744   1
  -7  -6 -14 4529.96 154.203   1
  -6 -14  -7 4375.21 163.271   1
  14  -7   6 4539.27 123.253   1
  -7  -5 -14 923.900 60.0125   1
  -5 -14  -7 890.927 66.3085   1
   5  14  -7 846.580 59.1433   1
   4  14  -7 6809.35 203.531   1
  -7  -4 -14 6952.34 203.188   1
  -4 -14  -7 6540.84 215.992   1
  -3 -14  -7 3284.54 131.923   1
  -7  -3 -14 3386.82 118.057   1
   3  14  -7 3308.32 118.858   1
  -2 -14  -7 420.335 46.6076   1
   2  14  -7 447.057 39.2932   1
  -7  -2 -14 526.707 39.9113   1
  -1 -14  -7 1799.19 92.7480   1
  -7  -1 -14 1952.97 78.6649   1
  14   7  -1 2115.95 97.1513   1
   1  14  -7 1927.60 79.6324   1
  -7   0 -14 25687.2 597.885   1
   0  14  -7 24581.9 600.273   1
  14   7   0 24533.7 625.821   1
   0 -14  -7 24787.4 625.311   1
   1 -14  -7 1888.91 91.5895   1
  -7   1 -14 2023.84 75.7205   1
  14   7   1 2146.44 98.7171   1
  -1  14  -7 1940.51 77.4592   1
  14   7   2 551.785 52.0329   1
   2 -14  -7 465.381 46.0879   1
  -7   2 -14 505.188 33.8357   1
  -2  14  -7 409.365 34.4552   1
   3 -14  -7 3339.27 127.647   1
  -3  14  -7 3293.71 104.058   1
  -7   3 -14 3297.59 101.389   1
  14   7   3 3479.97 133.526   1
  14   7   4 7078.20 220.771   1
  -4  14  -7 7105.23 184.331   1
  -7   4 -14 6898.17 181.508   1
   4 -14  -7 6989.60 214.755   1
  -7   5 -14 848.646 37.6621   1
   5 -14  -7 867.194 60.9958   1
   5  14   7 890.159 65.2528   1
  14   7   5 877.699 65.4669   1
  14   7   6 4653.19 162.370   1
  -7   6 -14 4333.26 117.025   1
   6  14   7 4473.53 163.027   1
  14   7   7 3387.94 134.314   1
   7  14   7 3294.03 135.786   1
  -7   7 -14 3267.23 88.9290   1
   8  14   7 1892.78 99.2372   1
  -7   8 -14 1822.59 53.0178   1
  14   7   8 1867.26 96.5907   1
  -7   9 -14 10.9722 7.31216   1
  14   7   9 4.24523 35.4828   1
   9  14   7 14.0455 34.4559   1
  10  14   7 7087.49 232.748   1
  14   7  10 6871.33 223.046   1
  14   7  11 1441.94 84.4117   1
  11  14   7 1394.54 93.1336   1
  14   7  12 125.279 41.8186   1
  12  14   7 84.0064 46.1101   1
  14   7  13 771.938 65.4685   1
  13  14   7 782.936 75.3859   1
  -8 -13 -14 8954.76 274.346   1
 -14  -8 -13 8661.59 262.742   1
  13  14  -8 8533.42 272.875   1
  -8 -12 -14 1713.13 97.6604   1
 -14  -8 -12 1701.33 90.6776   1
  12  14  -8 1464.41 92.3426   1
  11  14  -8 678.845 64.1151   1
 -14  -8 -11 721.711 59.8564   1
  -8 -11 -14 737.792 66.4642   1
  -8 -10 -14 1598.15 89.7783   1
 -14  -8 -10 1417.60 82.3781   1
  10  14  -8 1486.43 87.1113   1
  -8  -9 -14 131.939 37.3800   1
   9  14  -8 193.810 41.2868   1
 -14  -8  -9 105.320 34.6965   1
 -14  -8  -8 127.268 35.6603   1
   8  14  -8 141.506 33.9234   1
  -8  -8 -14 180.320 39.2762   1
  -7 -14  -8 31.1464 31.5364   1
  14  -8   7 14.9218 10.2876   1
  -8  -7 -14 3.71344 25.6954   1
  -6 -14  -8 2695.38 120.279   1
  14  -8   6 2755.00 79.5015   1
   6  14  -8 2573.02 109.951   1
  -8  -6 -14 2517.98 108.665   1
  -5 -14  -8 276.241 44.8259   1
   5  14  -8 202.185 37.3857   1
  -8  -5 -14 329.641 39.3053   1
  -4 -14  -8 283.051 41.8453   1
  -8  -4 -14 209.957 34.1368   1
   4  14  -8 233.433 35.5997   1
  -3 -14  -8 2519.37 113.727   1
   3  14  -8 2505.43 100.411   1
  -8  -3 -14 2667.92 101.341   1
  -2 -14  -8 24.5897 30.5951   1
   2  14  -8 19.2058 21.7423   1
  14   8  -2-16.3316 32.1515   1
  -8  -2 -14 5.34421 20.7744   1
  -1 -14  -8 245.029 39.4891   1
   1  14  -8 283.746 33.4172   1
  -8  -1 -14 316.306 32.6395   1
  14   8  -1 265.398 41.4073   1
  -8   0 -14 408.496 35.4566   1
  14   8   0 411.501 49.1627   1
   0  14  -8 479.854 38.9248   1
   0 -14  -8 486.482 49.6557   1
  14   8   1 324.663 44.2877   1
  -1  14  -8 308.572 30.4793   1
  -8   1 -14 306.240 29.7273   1
   1 -14  -8 314.500 41.5012   1
  -8   2 -14 3.70084 17.0372   1
  -2  14  -8-8.01521 19.9276   1
   2 -14  -8 34.1445 25.8177   1
  14   8   2-4.08374 30.2706   1
  -8   3 -14 2615.64 84.7285   1
  -3  14  -8 2501.44 85.9249   1
   3 -14  -8 2778.07 112.904   1
  14   8   3 2578.17 114.173   1
   4 -14  -8 248.256 38.1102   1
  -8   4 -14 253.249 23.0530   1
  -4  14  -8 249.427 23.6691   1
  14   8   4 237.483 40.1423   1
  -5  14  -8 254.955 21.9411   1
  -8   5 -14 254.733 22.3270   1
   6  14   8 2531.49 117.460   1
  14   8   6 2377.13 114.185   1
  -8   6 -14 2751.84 76.5748   1
  14   8   7-61.3938 38.2644   1
  -8   7 -14 2.82694 9.74057   1
   7  14   8-4.47424 34.7839   1
  14   8   8 177.639 42.3909   1
   8  14   8 189.193 41.2895   1
  14   8   9 196.763 42.6327   1
   9  14   8 119.234 42.8204   1
  14   8  10 1490.63 89.4830   1
  10  14   8 1443.32 92.3980   1
  11  14   8 807.160 71.7837   1
  14   8  11 841.681 68.1759   1
  12  14   8 1367.97 94.2775   1
  14   8  12 1763.47 94.4452   1
  13  14   8 9153.27 288.483   1
  14   8  13 8783.48 273.078   1
  13  14  -9 5361.39 194.094   1
 -14  -9 -13 5365.11 186.111   1
  -9 -13 -14 5408.34 195.597   1
 -13 -14  -9 5238.56 195.564   1
 -14  -9 -12 94.2350 37.5844   1
  -9 -12 -14 14.4085 40.6066   1
  12  14  -9 42.8283 37.0122   1
  -9 -11 -14 32.3088 37.0498   1
  11  14  -9 91.0422 35.6399   1
 -14  -9 -11 46.7278 31.7364   1
  -9 -10 -14 1015.48 73.6953   1
  10  14  -9 1206.90 77.8589   1
 -14  -9 -10 985.347 69.4464   1
  -9  -9 -14 1642.88 89.3671   1
 -14  -9  -9 1493.46 85.9214   1
   9  14  -9 1477.02 85.3435   1
   8  14  -9 1693.24 87.2161   1
  -9  -8 -14 1535.75 85.0238   1
 -14  -9  -8 1502.24 86.4805   1
  -9  -7 -14 59.8926 30.4007   1
  14  -9   7 23.0553 8.78260   1
   7  14  -9 26.1630 26.9076   1
  -6 -14  -9 80.8144 35.7106   1
   6  14  -9 163.218 33.4109   1
  -9  -6 -14 162.712 32.8629   1
  -5 -14  -9 3998.71 155.463   1
   5  14  -9 4180.71 145.070   1
  -9  -5 -14 4193.81 145.104   1
   4  14  -9 2907.55 113.468   1
  -4 -14  -9 2934.62 126.024   1
  -9  -4 -14 3042.67 115.001   1
  -9  -3 -14 377.581 37.7172   1
   3  14  -9 519.551 42.6102   1
  -3 -14  -9 515.972 50.5005   1
  14   9  -3 396.156 45.7364   1
   2  14  -9 57.8391 23.1965   1
  14   9  -2 89.2889 32.2189   1
  -9  -2 -14 54.3539 21.9856   1
  -2 -14  -9 83.8747 30.4484   1
   1  14  -9 308.516 33.0449   1
  -1 -14  -9 367.761 43.9955   1
  14   9  -1 242.405 43.8147   1
  -9  -1 -14 298.349 32.2881   1
  14   9   0 13278.3 369.937   1
   0  14  -9 13568.6 341.876   1
  -9   0 -14 13448.2 340.711   1
   0 -14  -9 13364.4 368.072   1
  -9   1 -14 400.356 32.5643   1
  14   9   1 273.030 44.5243   1
  -1  14  -9 359.123 32.1801   1
   1 -14  -9 234.374 37.1382   1
  -2  14  -9 49.5382 18.8655   1
  14   9   2 59.9625 31.0838   1
   2 -14  -9 70.5922 31.1010   1
  -9   2 -14 51.8113 19.2968   1
  -9   3 -14 521.357 32.5088   1
  -3  14  -9 484.008 33.1096   1
  14   9   3 501.070 52.7223   1
   3 -14  -9 547.179 50.8606   1
   4 -14  -9 3069.10 123.723   1
  -4  14  -9 3074.68 93.4516   1
  14   9   4 3099.11 130.411   1
  -9   4 -14 3032.50 91.3855   1
  14   9   5 4509.27 157.334   1
  -9   5 -14 4268.13 105.013   1
  -9   6 -14 103.069 13.4462   1
  14   9   6 112.717 40.6060   1
   7  14   9 18.4561 33.7122   1
  14   9   7 22.9840 35.2725   1
  14   9   8 1715.28 96.1630   1
   8  14   9 1558.40 92.8273   1
   9  14   9 1417.02 90.7726   1
  14   9   9 1609.35 92.6414   1
  14   9  10 1198.03 80.5464   1
  10  14   9 1018.48 79.1382   1
  14   9  11 37.7968 34.5206   1
  11  14   9 5.15925 46.1663   1
  14   9  12 33.3455 36.7997   1
  12  14   9 31.8694 45.6304   1
  14   9  13 5518.01 193.123   1
  13  14   9 5093.31 197.379   1
 -14 -10 -13 223.886 45.2038   1
 -10 -13 -14 197.777 50.7075   1
 -13 -14 -10 302.874 55.5800   1
 -10 -12 -14 296.344 51.4999   1
 -14 -10 -12 364.301 51.9073   1
 -12 -14 -10 377.381 57.0815   1
 -14 -10 -11 31.2163 34.4691   1
 -10 -11 -14 102.123 41.5564   1
 -14 -10 -10 3947.18 152.407   1
 -10 -10 -14 3934.52 152.959   1
 -10  -9 -14 3668.26 143.076   1
 -14 -10  -9 3537.01 143.012   1
 -14 -10  -8 1917.94 97.8067   1
 -10  -8 -14 2035.89 98.6466   1
   8  14 -10 1890.27 96.4601   1
   7  14 -10 349.892 44.8669   1
 -10  -7 -14 330.734 45.5714   1
 -10  -6 -14 3884.28 142.304   1
   6  14 -10 4053.07 144.244   1
 -10  -5 -14 734.457 54.9880   1
   5  14 -10 693.403 54.3858   1
  -5 -14 -10 719.174 62.8304   1
 -10  -4 -14 6064.98 185.749   1
  14  10  -4 5647.92 198.997   1
  -4 -14 -10 5937.07 202.739   1
   4  14 -10 6208.39 187.155   1
   3  14 -10 5.94840 22.3588   1
 -10  -3 -14-11.8339 28.8319   1
  14  10  -3-26.5590 32.5760   1
  -3 -14 -10 44.0182 31.4413   1
   2  14 -10 2667.87 102.968   1
  -2 -14 -10 3077.76 126.341   1
 -10  -2 -14 2855.68 105.297   1
  14  10  -2 2971.97 126.175   1
   1  14 -10 5.12168 20.4194   1
  14  10  -1 26.3670 30.1579   1
  -1 -14 -10 4.23177 26.2444   1
 -10  -1 -14-2.52196 21.5475   1
   0  14 -10 5215.40 153.054   1
  14  10   0 5036.88 179.588   1
   0 -14 -10 5004.74 175.959   1
 -10   0 -14 4998.35 151.215   1
 -10   1 -14 10.3685 16.3311   1
  14  10   1 4.42969 29.6303   1
   1 -14 -10 24.6076 32.5003   1
  -1  14 -10 8.63559 16.4552   1
   2 -14 -10 2879.53 121.052   1
  14  10   2 2839.44 124.501   1
  -2  14 -10 3143.21 98.6014   1
 -10   2 -14 2792.69 93.8213   1
 -10   3 -14 12.6722 15.3734   1
  14  10   3 22.5965 31.2715   1
   3 -14 -10-4.05753 28.7584   1
  -3  14 -10-6.94176 18.1924   1
 -10   4 -14 5702.94 152.979   1
  -4  14 -10 5878.80 156.658   1
  14  10   4 6165.62 204.321   1
  14  10   5 860.855 67.3365   1
 -10   5 -14 665.112 30.9985   1
 -10   6 -14 3946.65 100.121   1
  14  10   6 4027.97 158.029   1
  14  10   7 336.884 49.9251   1
  14  10   8 2263.65 113.663   1
   9  14  10 3448.37 148.383   1
  14  10   9 3585.15 148.689   1
  10  14  10 3664.35 154.277   1
  14  10  10 3819.39 154.714   1
  11  14  10 83.5662 43.4575   1
  14  10  11 103.861 44.0852   1
  12  14  10 301.748 57.4098   1
  14  10  12 393.826 58.7697   1
  14  10  13 187.423 49.5812   1
  13  14  10 232.999 56.8694   1
 -14 -11 -13 731.617 67.0988   1
 -13 -14 -11 611.467 66.4092   1
 -11 -13 -14 544.865 63.5734   1
 -14 -11 -12 1093.39 79.2009   1
 -11 -12 -14 1210.84 84.4869   1
 -12 -14 -11 979.747 78.6528   1
 -14 -11 -11 686.708 65.2825   1
 -11 -14 -11 652.324 66.9749   1
 -11 -11 -14 728.372 65.5122   1
 -14 -11 -10 471.397 57.7483   1
 -11 -10 -14 562.302 57.7703   1
 -11  -9 -14 102.508 39.6176   1
 -14 -11  -9 173.215 45.7854   1
 -14 -11  -8 31.4567 36.9229   1
 -11  -8 -14 4.06869 31.6329   1
 -11  -7 -14 590.281 55.3078   1
 -11  -6 -14 2728.85 114.044   1
   5  14 -11 756.820 57.6791   1
  14  11  -5 780.285 65.6607   1
 -11  -5 -14 665.314 53.4431   1
 -11  -4 -14 5130.03 164.659   1
  14  11  -4 5029.02 181.667   1
   4  14 -11 5134.25 164.329   1
  -4 -14 -11 4888.96 180.244   1
  14  11  -3 386.895 50.5336   1
  -3 -14 -11 377.887 48.5879   1
   3  14 -11 422.816 41.3835   1
 -11  -3 -14 489.941 44.1885   1
 -11  -2 -14 1508.68 70.8035   1
   2  14 -11 1445.23 69.8769   1
  14  11  -2 1308.62 83.5409   1
  -2 -14 -11 1345.39 82.1837   1
  14  11  -1 453.106 51.2578   1
   1  14 -11 393.677 36.0609   1
  -1 -14 -11 399.051 47.7410   1
 -11  -1 -14 377.257 35.1593   1
   0  14 -11 28.4946 20.6150   1
   0 -14 -11 55.6290 32.1706   1
 -11   0 -14-9.21698 18.6015   1
  14  11   0 13.7893 34.3149   1
  -1  14 -11 441.343 34.9456   1
   1 -14 -11 465.857 50.4941   1
 -11   1 -14 427.593 33.6295   1
  -2  14 -11 1416.82 59.5509   1
   2 -14 -11 1367.75 80.7120   1
  14  11   2 1317.78 84.9486   1
 -11   2 -14 1335.39 56.4318   1
   3 -14 -11 435.361 48.7835   1
 -11   3 -14 415.179 29.3657   1
  -3  14 -11 353.314 29.7132   1
  14  11   3 475.549 53.3771   1
  -4  14 -11 4942.56 137.151   1
 -11   4 -14 5022.52 133.941   1
  14  11   4 5072.73 183.218   1
  14  11   5 689.841 64.0952   1
  14  11   6 2682.80 126.678   1
  14  11   7 644.083 64.9677   1
  14  11   8-5.05058 41.7364   1
  14  11   9 122.201 44.5118   1
  14  11  10 534.148 65.2007   1
  10  14  11 556.772 64.6989   1
  11  14  11 589.466 67.4153   1
  14  11  11 777.774 71.5691   1
  14  11  12 1012.25 78.9341   1
  12  14  11 1079.30 84.9191   1
  14  11  13 808.513 71.7032   1
  13  14  11 571.705 67.4300   1
 -14 -12 -13 1568.58 96.9558   1
 -13 -14 -12 1543.47 98.1902   1
 -12 -13 -14 1460.52 96.2852   1
 -12 -14 -12 233.281 49.4425   1
 -14 -12 -12 211.710 47.3805   1
 -12 -12 -14 148.004 44.1394   1
 -12 -11 -14 9.46515 36.0683   1
 -14 -12 -11 4.88752 43.3013   1
 -11 -14 -12-15.3078 43.8297   1
 -12 -10 -14 6287.71 210.861   1
 -14 -12 -10 6273.56 215.961   1
 -10 -14 -12 6308.80 218.663   1
 -12  -9 -14 17.2015 33.6526   1
 -14 -12  -9 33.4046 42.2819   1
 -12  -8 -14 2861.72 122.073   1
 -14 -12  -8 2837.87 127.996   1
 -12  -7 -14 1650.87 88.0591   1
 -14 -12  -7 1712.58 95.8461   1
  14 -12   6 238.290 17.6043   1
 -12  -6 -14 186.725 39.3955   1
 -12  -5 -14 3152.95 121.805   1
  14  12  -4 1615.72 94.9516   1
 -12  -4 -14 1511.46 77.0987   1
  14  12  -3-4.75820 33.7246   1
  -3 -14 -12-13.8939 34.5735   1
 -12  -3 -14-3.01035 25.4420   1
   3  14 -12 3.02986 24.8935   1
   2  14 -12 1307.16 66.8378   1
  -2 -14 -12 1302.64 81.4930   1
  14  12  -2 1231.94 81.2738   1
 -12  -2 -14 1389.76 68.6418   1
  -1 -14 -12 89.0891 34.1922   1
  14  12  -1 76.2503 35.8404   1
 -12  -1 -14 28.1541 22.0081   1
   1  14 -12 34.1943 23.2088   1
   0  14 -12 3492.45 115.128   1
  14  12   0 3115.29 139.686   1
   0 -14 -12 3568.88 141.245   1
 -12   0 -14 3508.91 114.356   1
  14  12   1 28.8868 34.6885   1
 -12   1 -14 83.5487 21.2394   1
   1 -14 -12 87.5780 33.1845   1
  -1  14 -12 67.7630 21.2737   1
  14  12   2 1373.99 85.5330   1
   2 -14 -12 1184.07 76.7300   1
  -2  14 -12 1340.31 57.8128   1
 -12   2 -14 1254.64 54.6504   1
 -12   3 -14 1.57774 15.3759   1
   3 -14 -12-4.39372 31.8626   1
  -3  14 -12 3.44993 18.7171   1
  14  12   3-9.90828 35.9267   1
  -4  14 -12 1632.14 59.4380   1
  14  12   4 1549.73 94.9975   1
  14  12   5 3160.11 139.950   1
  -6  14 -12 210.476 16.3809   1
  14  12   6 237.418 50.7291   1
  14  12   7 1923.13 107.667   1
  14  12   8 3021.24 141.110   1
  14  12   9-47.5145 49.5113   1
  14  12  10 6017.23 215.107   1
  14  12  11 32.1541 44.5445   1
  14  12  12 324.203 54.1665   1
  12  14  12 133.823 48.1409   1
  14  12  13 1535.94 99.8593   1
  13  14  12 1575.20 101.187   1
 -13 -13 -14 3822.77 161.297   1
 -13 -14 -13 3798.17 161.532   1
 -14 -13 -13 3921.35 162.117   1
 -14 -13 -12 20.5415 43.6483   1
 -12 -14 -13 36.8778 43.5439   1
 -13 -12 -14 59.9972 41.3257   1
 -11 -14 -13 1431.51 94.7414   1
 -13 -11 -14 1469.84 91.7936   1
 -14 -13 -11 1534.81 97.2237   1
 -14 -13 -10 1156.29 84.5673   1
 -10 -14 -13 1217.98 86.7600   1
 -13 -10 -14 1253.72 82.7098   1
 -14 -13  -9 1845.33 105.856   1
 -13  -9 -14 2172.96 105.690   1
  -9 -14 -13 2012.96 110.696   1
 -13  -8 -14 269.749 45.2969   1
 -14 -13  -8 402.512 57.1514   1
 -13  -7 -14 9674.75 275.986   1
 -14 -13  -7 8919.82 283.883   1
 -13  -6 -14 70.6655 33.5372   1
  14 -13   6 123.237 16.0272   1
  14 -13   5 112.050 19.0076   1
 -13  -5 -14 112.113 34.2351   1
 -13  -4 -14 3517.72 128.964   1
 -13  -3 -14 6649.15 200.895   1
  14  13  -3 6845.62 228.018   1
  -2 -14 -13 3426.23 143.698   1
  14  13  -2 3550.31 148.487   1
 -13  -2 -14 3536.88 122.800   1
   2  14 -13 3489.73 122.535   1
  14  13  -1 3253.13 143.636   1
   1  14 -13 3571.86 119.689   1
 -13  -1 -14 3521.74 118.441   1
  -1 -14 -13 3315.31 142.354   1
  14  13   0 3419.09 146.535   1
 -13   0 -14 3430.54 114.785   1
   0  14 -13 3585.49 117.328   1
   0 -14 -13 3435.12 140.768   1
 -13   1 -14 3343.54 108.375   1
   1 -14 -13 3327.42 137.651   1
  -1  14 -13 3347.58 110.201   1
  14  13   1 3127.72 141.229   1
  -2  14 -13 3476.00 110.013   1
 -13   2 -14 3382.60 107.673   1
   2 -14 -13 3625.78 142.680   1
  14  13   2 3426.40 147.582   1
  14  13   3 6473.79 227.864   1
  -3  14 -13 6831.51 181.424   1
   3 -14 -13 6782.65 221.936   1
  14  13   4 3497.07 151.029   1
  -4  14 -13 3557.40 104.699   1
  14  13   5 100.833 47.0713   1
  -6  14 -13 93.9612 14.0065   1
  14  13   6 97.0219 43.0299   1
  14  13   7 9888.30 307.660   1
  14  13   8 432.354 65.5835   1
  14  13   9 2057.83 116.728   1
  14  13  10 1209.32 90.2804   1
  14  13  11 1635.73 105.575   1
  14  13  12 28.0817 43.9498   1
  14  13  13 3983.19 168.422   1
 -14 -14 -14 689.469 74.4155   1
 -14 -14 -13 48.7042 48.8938   1
 -14 -13 -14-10.6085 46.7578   1
 -13 -14 -14-16.2636 45.3111   1
 -14 -14 -12-10.6917 46.8870   1
 -14 -12 -14-15.2943 41.8873   1
 -12 -14 -14-16.0572 48.3600   1
 -14 -14 -11 58.4313 43.6514   1
 -11 -14 -14 15.9072 42.2878   1
 -14 -11 -14 43.9766 41.3053   1
 -14 -14 -10 26.3056 42.2156   1
 -14 -10 -14 18.6778 39.0358   1
 -10 -14 -14 73.9237 48.6225   1
  -9 -14 -14 981.388 81.8172   1
 -14 -14  -9 1169.91 85.8332   1
  14  14  -9 1178.66 83.7238   1
 -14  -9 -14 944.796 73.5099   1
 -14 -14  -8 15.3573 45.3563   1
 -14  -8 -14 59.2938 37.5268   1
  -8 -14 -14-10.3594 45.1997   1
  14  14  -8 30.8937 39.5099   1
 -14  -7 -14 4876.16 170.945   1
  14 -14   6 4105.05 107.471   1
 -14  -6 -14 4149.68 149.995   1
 -14  -5 -14 284.770 44.0269   1
  14 -14   5 364.680 27.1656   1
  14 -14   4 5145.79 144.696   1
 -14  -4 -14 5317.81 170.034   1
 -14  -3 -14 708.684 52.9611   1
 -14  -2 -14 1921.21 83.6397   1
  14  14  -2 1815.44 106.092   1
  14  14  -1 40.9765 40.8888   1
 -14  -1 -14 125.856 28.5368   1
  -1 -14 -14 56.7759 42.1726   1
  14  14   0 693.451 71.6013   1
 -14   0 -14 801.718 49.0384   1
   0 -14 -14 752.222 68.3201   1
   0  14 -14 853.249 50.8069   1
  -1  14 -14 109.371 25.9349   1
  14  14   1 115.680 46.8633   1
   1 -14 -14 46.6621 36.3353   1
  -2  14 -14 1775.95 71.6287   1
   2 -14 -14 1876.66 100.086   1
  14  14   2 1921.42 107.251   1
  -3  14 -14 678.997 40.3241   1
  14  14   3 683.184 69.9014   1
  14  14   4 5480.06 200.397   1
  -4  14 -14 5175.41 142.949   1
  14  14   5 286.667 56.2655   1
  14  14   6 4480.08 176.881   1
  -6  14 -14 4179.51 106.283   1
  14  14   7 5043.67 194.651   1
  14  14   8 33.9967 46.8290   1
  14  14   9 1077.51 86.7279   1
  14  14  10 34.2778 45.8396   1
  14  14  11 92.1989 50.0633   1
  14  14  12-17.4982 45.6403   1
  14  14  13 29.7563 50.5770   1
   0  15   0 11.9054 23.1389   1
   0 -15   0-12.9509 25.1708   1
  -1  15   0-2.85811 21.6348   1
  -1 -15   0 16.7278 22.1807   1
   1 -15   0-12.6679 20.8083   1
   1  15   0 3.13077 23.5358   1
   2  15   0 1056.54 63.6203   1
   2 -15   0 1133.93 62.6599   1
  -2 -15   0 1102.38 65.4065   1
  -3 -15   0-14.2206 23.7817   1
   3  15   0 6.99167 25.7286   1
   3 -15   0 42.1506 21.9979   1
  15   0   4 4370.62 142.257   1
   4 -15   0 4461.35 143.956   1
  -4 -15   0 4071.98 151.045   1
   4  15   0 4398.52 152.825   1
  -5 -15   0-11.5196 29.4617   1
   5 -15   0 8.69918 24.2362   1
   5  15   0-11.5380 33.9031   1
  15   0   5 2.82632 23.7550   1
  15   0   6 5017.08 158.696   1
   6  15   0 4975.83 175.115   1
   6 -15   0 5320.37 160.712   1
  -6 -15   0 5019.69 174.079   1
   7 -15   0-5.53342 20.6555   1
  15   0   7-31.2429 25.0385   1
  -7 -15   0 28.5929 33.9488   1
  15   0   8 488.021 43.0538   1
   8 -15   0 502.699 40.3864   1
   9 -15   0 42.6759 22.5578   1
  15   0   9 31.4479 24.9599   1
  15   0  10 1115.34 59.8335   1
  10 -15   0 1084.92 58.3924   1
  15   0  11-5.54071 24.7884   1
  11 -15   0 2.66465 22.2714   1
  15   0  12 21111.4 519.734   1
  13  15   0 15.6383 47.7730   1
   0 -14 -15 20600.5 532.357   1
  14  15   0 19370.8 538.451   1
  14  15  -1 1555.26 100.435   1
  12 -15   1 5071.60 150.966   1
  15  -1  12 4808.90 150.020   1
  11 -15   1 575.702 41.1547   1
  15  -1  11 509.776 40.0818   1
  15  -1  10 7.67772 19.7672   1
  10 -15   1 7.44743 19.4250   1
  15  -1   9 5196.12 159.559   1
   9 -15   1 5355.41 158.685   1
  15  -1   8 1005.02 56.6527   1
   8 -15   1 1006.24 54.7750   1
  -8 -15  -1 1015.83 70.8773   1
  -7 -15  -1 7750.92 239.763   1
   7 -15   1 7792.24 217.235   1
  15  -1   7 7553.59 216.112   1
   7  15  -1 7920.49 239.900   1
   6  15  -1 3.90423 31.5132   1
   6 -15   1 2.67980 22.2724   1
  15  -1   6-20.9435 26.4454   1
  -6 -15  -1-8.05344 35.6753   1
   5  15  -1 1338.21 77.3750   1
   5 -15   1 1221.77 63.3840   1
  -5 -15  -1 1271.72 76.5296   1
  15  -1   5 1319.82 65.1102   1
  15  -1   4 4001.08 129.498   1
   4  15  -1 3848.98 140.047   1
  -4 -15  -1 3928.26 142.930   1
   4 -15   1 3655.46 128.625   1
   3 -15   1 2.88212 22.1146   1
  -3 -15  -1-3.64083 26.9885   1
   3  15  -1 41.2657 26.9082   1
   2 -15   1 548.025 42.7272   1
   2  15  -1 538.837 46.0227   1
  -2 -15  -1 516.575 47.0732   1
   1  15  -1 5369.86 170.124   1
  -1 -15  -1 5439.19 175.862   1
   1 -15   1 5511.63 169.975   1
   0  15   1 12.2884 22.4456   1
   0  15  -1-14.5207 20.5851   1
   0 -15   1 34.5238 24.2421   1
   0 -15  -1 23.6344 23.9317   1
   1 -15  -1 5257.59 171.183   1
  -1  15  -1 5472.87 165.557   1
   1  15   1 5486.97 171.606   1
  -1 -15   1 5342.96 171.413   1
   2 -15  -1 496.764 44.1965   1
   2  15   1 510.070 46.9851   1
  -2 -15   1 589.049 48.2389   1
   3  15   1 28.2363 27.6185   1
   3 -15  -1-9.45820 27.9332   1
  15   1   3 9.16122 26.3712   1
  -3 -15   1 24.6009 25.1042   1
   4 -15  -1 3929.09 135.696   1
  15   1   4 3927.11 134.302   1
  -4 -15   1 4207.76 144.003   1
  -5 -15   1 1251.23 73.9625   1
  15   1   5 1235.87 67.3032   1
   5 -15  -1 1314.33 68.4839   1
   5  15   1 1268.86 77.8135   1
   6 -15  -1 20.6389 23.8045   1
  15   1   6 30.1874 25.7977   1
   7 -15  -1 7377.95 214.330   1
  15   1   7 7577.45 218.456   1
   8 -15  -1 871.383 54.0123   1
  15   1   8 887.319 56.5550   1
  15   1   9 4898.54 160.272   1
   9 -15  -1 5131.96 157.695   1
  10 -15  -1 22.7503 19.6821   1
  15   1  10 12.3204 24.7142   1
  15   1  11 571.261 46.9673   1
  15   1  12 4777.26 155.007   1
  12  15   1 4790.40 183.089   1
  13  15   1 394.856 59.6851   1
   1 -13 -15 518.011 60.6288   1
  -1  14 -15 1633.45 71.0299   1
   1 -14 -15 1592.36 96.6250   1
  14  15   1 1754.13 105.734   1
  14 -15   2 5412.22 156.404   1
 -15  -2 -14 5068.87 163.119   1
  13 -15   2 1048.15 52.7887   1
  12 -15   2 1811.48 73.5190   1
  15  -2  11 97.4425 22.9499   1
  11 -15   2 63.7514 21.7046   1
  10 -15   2 180.394 27.4080   1
  15  -2  10 137.027 25.5933   1
  -9 -15  -2 173.357 37.8454   1
   9 -15   2 202.573 28.0619   1
  15  -2   9 195.857 27.6404   1
   9  15  -2 244.388 42.2486   1
  -2  -9 -15 230.506 38.3492   1
  15  -2   8 1891.87 75.4112   1
  -8 -15  -2 1748.49 94.8595   1
   8 -15   2 1713.71 73.3091   1
   8  15  -2 1696.82 91.1915   1
  -2  -8 -15 1768.07 88.8632   1
  -7 -15  -2 2622.78 117.547   1
   7 -15   2 2676.34 98.4515   1
  15  -2   7 2910.42 99.8569   1
   7  15  -2 2750.42 117.970   1
  -6 -15  -2 1823.73 94.8631   1
  15  -2   6 1916.57 78.7242   1
   6  15  -2 2031.08 96.9339   1
   6 -15   2 2006.25 81.4465   1
  -5 -15  -2 24872.5 627.031   1
  15  -2   5 25435.1 603.097   1
   5 -15   2 24847.4 604.419   1
   5  15  -2 24761.0 623.670   1
  -4 -15  -2 842.549 62.0017   1
   4  15  -2 772.053 57.8703   1
  15  -2   4 807.805 50.6371   1
   4 -15   2 904.268 53.8004   1
   3  15  -2 11058.8 303.643   1
  -3 -15  -2 10680.5 307.043   1
   3 -15   2 11269.9 294.411   1
   2  15  -2 369.043 39.6642   1
  -2 -15  -2 407.344 43.8860   1
   2 -15   2 411.888 38.3531   1
   1 -15   2 52.9777 24.0481   1
   1  15  -2 39.4441 25.6504   1
  -1 -15  -2-3.57210 26.2952   1
   0 -15   2 9.10942 21.1855   1
   0  15  -2 8.46826 22.5104   1
   0 -15  -2 38.3308 24.7003   1
  -1 -15   2 28.6570 22.5851   1
  -1  15  -2 58.5764 22.7657   1
   1 -15  -2 54.3701 26.6035   1
   1  15   2 19.8288 23.4399   1
  -2 -15   2 415.577 43.2359   1
  -2  15  -2 505.479 38.8179   1
   2 -15  -2 350.970 44.2591   1
   2  15   2 402.689 42.8891   1
  15   2   2 337.716 41.0832   1
   3  15   2 11075.1 308.442   1
  -3 -15   2 11226.1 307.348   1
  15   2   3 11028.4 302.900   1
   3 -15  -2 11079.8 303.933   1
   4  15   2 811.851 62.2609   1
   4 -15  -2 885.594 58.0253   1
  15   2   4 816.960 57.9303   1
   5 -15  -2 24328.4 598.336   1
  15   2   5 24252.1 598.586   1
   6 -15  -2 1946.39 86.9339   1
  15   2   6 1936.33 88.6707   1
  15   2   7 2665.76 107.463   1
   7 -15  -2 2707.54 105.228   1
   8 -15  -2 1682.49 78.1621   1
  15   2   8 1780.74 84.0618   1
  15   2   9 216.661 34.9666   1
   9 -15  -2 257.819 35.4312   1
  15   2  10 149.529 33.3433   1
  15   2  11 39.2764 25.2935   1
  11  15   2 34.6396 36.1625   1
  12  15   2 1614.80 98.3440   1
  15   2  12 1783.94 84.4638   1
  13  15   2 826.901 77.7023   1
  15   2  13 996.501 63.2165   1
   2 -14 -15 4833.32 184.370   1
  -2  14 -15 5268.15 150.824   1
  14  15   2 5211.92 196.049   1
  14 -15   3 2035.35 75.9373   1
 -15  -3 -14 1882.54 87.9268   1
  13 -15   3 6688.64 183.872   1
 -15  -3 -13 6639.00 199.565   1
  12 -15   3 1905.06 73.9076   1
  15  -3  11 3028.62 98.7186   1
  11 -15   3 3063.18 101.469   1
  -3 -10 -15 408.740 49.0098   1
 -10 -15  -3 355.866 49.5437   1
  15  -3  10 369.486 32.3490   1
  10  15  -3 362.813 50.4607   1
  10 -15   3 415.573 33.8135   1
  -3  -9 -15 10046.2 289.840   1
  15  -3   9 10097.5 261.144   1
  -9 -15  -3 10012.7 297.393   1
   9 -15   3 10003.2 261.858   1
   9  15  -3 10024.2 294.781   1
  15  -3   8 164.095 25.3029   1
  -8 -15  -3 184.076 40.6726   1
   8 -15   3 147.558 24.2804   1
  -3  -8 -15 93.3327 33.7292   1
   8  15  -3 148.581 38.6649   1
  -7 -15  -3 1745.02 92.2506   1
  -3  -7 -15 1557.31 82.6660   1
   7 -15   3 1701.94 71.6944   1
  15  -3   7 1818.58 71.9784   1
   7  15  -3 1694.05 89.9441   1
  15  -3   6 139.341 25.9070   1
   6  15  -3 76.0955 33.9523   1
  -3  -6 -15 95.2337 33.3600   1
  -6 -15  -3 115.934 35.4482   1
   6 -15   3 74.8506 25.7329   1
   5  15  -3 8534.51 250.905   1
  -5 -15  -3 8319.86 254.826   1
   5 -15   3 8432.26 231.012   1
  15  -3   5 8667.84 229.969   1
   4  15  -3 5745.93 182.283   1
  -4 -15  -3 5588.86 187.046   1
   4 -15   3 5509.54 166.254   1
   3  15  -3 1419.71 73.6890   1
   3 -15   3 1302.42 64.0477   1
  -3 -15  -3 1228.55 74.7426   1
  -2 -15  -3 395.361 45.2779   1
   2  15  -3 418.643 41.7285   1
   2 -15   3 327.084 35.6082   1
   1  15  -3 5049.09 157.646   1
  -1 -15  -3 4782.48 164.433   1
   1 -15   3 4719.22 152.157   1
   0 -15   3 38.7401 22.2502   1
   0 -15  -3 28.6996 26.2124   1
   0  15  -3-2.79561 19.6632   1
  -1 -15   3 4850.94 157.243   1
   1 -15  -3 4702.53 162.473   1
  -1  15  -3 4959.06 150.772   1
   1  15   3 4957.61 163.097   1
   2  15   3 398.322 43.9955   1
  15   3   2 279.496 40.8408   1
  -2 -15   3 352.800 38.3296   1
   2 -15  -3 330.317 41.8586   1
  -2  15  -3 408.875 36.0408   1
  15   3   3 1309.66 73.3625   1
   3 -15  -3 1302.35 73.1675   1
   3  15   3 1342.77 77.1684   1
   4 -15  -3 5598.35 179.863   1
  15   3   4 5628.33 180.552   1
  15   3   5 8580.57 247.452   1
   5 -15  -3 8501.86 245.982   1
   6 -15  -3 31.9267 27.6051   1
  15   3   6 106.230 32.5874   1
   7 -15  -3 1481.88 76.7369   1
  15   3   7 1653.57 82.3103   1
  15   3   8 140.566 33.1332   1
   8 -15  -3 170.492 31.0924   1
  15   3   9 9846.23 279.162   1
  15   3  10 466.348 48.2954   1
  10  15   3 394.385 55.5893   1
  11  15   3 2801.99 130.455   1
  15   3  11 2898.51 115.679   1
  15   3  12 1907.78 88.2804   1
  12  15   3 1739.66 101.824   1
  15   3  13 6949.47 210.831   1
  -3  13 -15 6780.69 182.431   1
  13  15   3 6729.45 232.974   1
  -3  14 -15 2108.71 76.6382   1
  14  15   3 2098.45 116.822   1
  14 -15   4 750.409 41.3972   1
 -15  -4 -14 680.238 56.8121   1
 -15  -4 -13 275.521 42.9126   1
  13 -15   4 253.914 28.8548   1
  12 -15   4 2445.24 84.2308   1
 -15  -4 -12 2545.25 103.203   1
  11  15  -4 153.396 42.7456   1
  11 -15   4 169.001 24.2157   1
  -4 -11 -15 118.349 38.6056   1
 -11 -15  -4 177.312 41.0959   1
  -4 -10 -15 403.799 48.9051   1
  10 -15   4 439.402 32.9625   1
  10  15  -4 391.753 50.1954   1
 -10 -15  -4 449.712 51.9023   1
  15  -4  10 447.276 32.6095   1
   9 -15   4 46.3365 20.1918   1
  -9 -15  -4 31.9276 34.0644   1
  -4  -9 -15 19.8506 32.8232   1
   9  15  -4 68.3479 36.1166   1
  15  -4   9 51.0557 19.8768   1
  15  -4   8 7593.74 202.713   1
   8  15  -4 7552.02 234.687   1
   8 -15   4 7369.92 202.994   1
  -4  -8 -15 7663.97 231.521   1
  -8 -15  -4 8030.05 242.933   1
   7 -15   4 3083.28 101.348   1
  15  -4   7 2978.44 99.7004   1
  -4  -7 -15 3181.67 121.463   1
   7  15  -4 3267.71 127.424   1
  -7 -15  -4 2869.88 126.602   1
  -6 -15  -4 2375.91 108.217   1
   6  15  -4 2024.02 98.5399   1
  15  -4   6 2222.12 81.6921   1
   6 -15   4 2301.75 83.8129   1
  -4  -6 -15 2258.15 98.1103   1
  15  -4   5 5081.97 145.847   1
  -4  -5 -15 4913.70 159.888   1
  -5 -15  -4 4557.22 168.850   1
   5  15  -4 4530.35 162.425   1
   5 -15   4 5003.90 146.688   1
  -4  -4 -15 2086.26 90.3997   1
   4 -15   4 2233.59 84.2404   1
  -4 -15  -4 2086.44 101.050   1
   4  15  -4 2060.27 95.4630   1
   3 -15   4 5188.19 158.123   1
   3  15  -4 5261.77 169.880   1
  -3 -15  -4 5300.22 179.322   1
   2  15  -4 2848.06 107.618   1
  -2 -15  -4 2570.16 113.661   1
   2 -15   4 2820.70 101.768   1
   1  15  -4 620.590 46.9029   1
  -1 -15  -4 547.892 51.1045   1
   1 -15   4 574.044 43.9004   1
   0  15  -4 10.9855 20.5024   1
   0 -15  -4-7.45599 31.5072   1
   1 -15  -4 534.870 49.7517   1
  -1  15  -4 536.150 41.0775   1
  15   4   1 496.313 48.8922   1
   2 -15  -4 2627.21 109.683   1
   2  15   4 2547.88 110.376   1
  -2  15  -4 2733.63 95.9934   1
  15   4   2 2667.47 110.481   1
   3 -15  -4 5099.86 172.551   1
  15   4   3 5417.14 176.275   1
  -3  15  -4 5372.98 155.374   1
   4 -15  -4 2292.77 98.9228   1
  15   4   4 2036.46 96.3179   1
   5 -15  -4 5102.04 166.666   1
  15   4   5 4946.44 168.090   1
  15   4   6 2132.45 99.4579   1
   6 -15  -4 2214.76 96.8203   1
  15   4   7 3125.51 123.143   1
   7 -15  -4 3059.49 117.754   1
  15   4   8 7236.61 224.981   1
   8 -15  -4 7539.99 220.337   1
   9  15   4 66.3315 37.8046   1
  15   4   9 60.4690 31.0825   1
  10  15   4 453.751 54.2399   1
  15   4  10 432.462 48.3072   1
  15   4  11 108.874 34.0342   1
  11  15   4 148.639 41.2143   1
  15   4  12 2604.84 110.526   1
  12  15   4 2398.13 122.339   1
  -4  12 -15 2492.31 80.3965   1
  15   4  13 423.555 48.7053   1
  13  15   4 344.418 59.7584   1
  -4  13 -15 290.377 27.2292   1
  -4  14 -15 806.635 40.8683   1
  14  15   4 717.938 73.6597   1
 -15  -5 -14 21.9319 35.6230   1
  14 -15   5-2.97690 19.7366   1
  13 -15   5 5753.43 152.849   1
 -15  -5 -13 5477.14 181.932   1
  12 -15   5 2228.72 74.0676   1
  12  15  -5 2101.39 110.925   1
 -15  -5 -12 2217.74 100.565   1
  -5 -12 -15 2152.31 110.483   1
 -11 -15  -5 1500.27 91.7253   1
 -15  -5 -11 1485.78 79.0255   1
  11 -15   5 1525.51 57.5139   1
  11  15  -5 1523.16 91.6255   1
  -5 -11 -15 1442.56 87.8865   1
  15  -5  10 2.70382 14.4725   1
 -10 -15  -5 23.6825 32.2327   1
  10  15  -5-17.8528 35.1458   1
  -5 -10 -15-38.3397 35.8048   1
  10 -15   5-3.15833 17.4184   1
  -5  -9 -15 4410.05 157.932   1
   9  15  -5 4302.72 159.559   1
   9 -15   5 4339.59 124.364   1
  -9 -15  -5 4239.47 162.948   1
  15  -5   9 4318.15 122.513   1
  15  -5   8 4421.07 128.824   1
  -8 -15  -5 4565.80 167.641   1
   8 -15   5 4412.85 129.722   1
  -5  -8 -15 4656.52 160.345   1
   8  15  -5 4647.89 163.363   1
  -7 -15  -5 3637.61 143.308   1
   7 -15   5 3708.76 111.782   1
  15  -5   7 3589.22 110.025   1
  -5  -7 -15 3679.05 135.039   1
   7  15  -5 3384.92 135.806   1
  15  -5   6 1033.82 48.6009   1
  -5  -6 -15 875.358 60.6503   1
  -6 -15  -5 863.884 66.9869   1
   6 -15   5 952.356 48.6180   1
   6  15  -5 879.895 62.5687   1
  -5  -5 -15 20459.8 516.654   1
   5 -15   5 20758.5 497.340   1
  -5 -15  -5 20542.7 532.409   1
   5  15  -5 20464.2 521.884   1
   4  15  -5 1672.12 81.9711   1
   4 -15   5 1608.95 68.7753   1
  -5  -4 -15 1526.15 76.4509   1
  -4 -15  -5 1634.06 88.9809   1
   3  15  -5 4855.46 157.871   1
  -3 -15  -5 4706.73 167.321   1
  -5  -3 -15 4584.44 151.041   1
   3 -15   5 4759.77 145.029   1
  -2 -15  -5 2999.56 124.479   1
  -5  -2 -15 3022.41 108.663   1
   2  15  -5 2978.74 111.793   1
  -1 -15  -5 328.025 41.3145   1
   1  15  -5 271.528 34.4164   1
   0  15  -5-16.2274 24.2009   1
   0 -15  -5-3.85548 31.4929   1
   1 -15  -5 165.636 35.3186   1
  15   5   1 211.072 38.8191   1
  -1  15  -5 262.481 30.1936   1
  15   5   2 2971.62 121.774   1
  -2  15  -5 3026.99 103.877   1
   2 -15  -5 3196.12 123.419   1
   3 -15  -5 4811.61 163.591   1
  15   5   3 4490.72 162.446   1
  -3  15  -5 5022.99 143.533   1
   4 -15  -5 1511.91 81.9233   1
  15   5   4 1677.11 86.2434   1
  15   5   5 21057.8 538.062   1
   5 -15  -5 21202.3 533.414   1
  15   5   6 866.307 63.1812   1
   6 -15  -5 950.693 61.9779   1
   7 -15  -5 3948.27 139.115   1
  15   5   7 3635.91 140.720   1
  15   5   8 4387.08 157.643   1
   8  15   5 4451.05 167.201   1
   9  15   5 4373.85 170.071   1
  15   5   9 4653.01 162.932   1
  15   5  10-32.2143 32.3059   1
  10  15   5 44.8622 36.4173   1
  11  15   5 1521.10 94.2045   1
  15   5  11 1487.26 84.0326   1
  15   5  12 2295.83 107.037   1
  12  15   5 2236.30 119.161   1
  13  15   5 5560.70 207.709   1
  15   5  13 5823.32 191.943   1
  14  15   5 34.4089 47.3966   1
  14 -15   6 687.814 30.0494   1
 -15  -6 -14 569.504 55.9463   1
  -6 -13 -15 179.998 48.8514   1
  13  15  -6 130.939 48.1808   1
  13 -15   6 167.583 18.3998   1
 -15  -6 -13 110.583 36.8630   1
  12  15  -6 2803.19 128.535   1
 -15  -6 -12 2812.62 116.727   1
  12 -15   6 2685.02 79.1508   1
  -6 -12 -15 2880.55 128.604   1
  -6 -11 -15 191.242 42.4612   1
  11  15  -6 166.421 42.5162   1
 -15  -6 -11 132.609 36.2238   1
  11 -15   6 160.892 18.5924   1
 -10 -15  -6 71.6633 35.9733   1
  10 -15   6 98.8204 17.0759   1
  -6 -10 -15 69.1808 35.1679   1
  10  15  -6 101.927 38.9206   1
   9 -15   6 3625.64 104.048   1
  -9 -15  -6 3665.99 148.574   1
   9  15  -6 3403.35 140.322   1
  15  -6   9 3639.84 101.411   1
  -6  -9 -15 3776.07 143.616   1
  15  -6   8 5662.38 148.290   1
   8  15  -6 5289.82 184.298   1
  -6  -8 -15 5260.14 182.445   1
   8 -15   6 5576.13 149.392   1
  -8 -15  -6 5589.61 194.160   1
  -6  -7 -15 3.68558 26.3275   1
  -7 -15  -6 35.7101 31.8855   1
  15  -6   7 20.1326 15.0962   1
   7  15  -6-3.85821 32.2490   1
  15  -6   6 193.232 24.4357   1
  -6  -6 -15 186.641 35.8409   1
  -6 -15  -6 205.594 41.7843   1
   6  15  -6 194.549 38.0329   1
  -6  -5 -15 2404.87 101.051   1
   5  15  -6 2396.24 103.487   1
  -5 -15  -6 2393.19 111.006   1
   4  15  -6 901.874 61.5755   1
  -6  -4 -15 878.067 57.6424   1
  -4 -15  -6 919.283 68.2227   1
  -3 -15  -6 960.515 69.3692   1
   3  15  -6 1077.43 62.2826   1
  -6  -3 -15 991.853 59.5348   1
  -2 -15  -6 2813.69 121.303   1
   2  15  -6 3184.09 114.756   1
  -6  -2 -15 3036.87 108.425   1
   1  15  -6 5522.56 170.780   1
  -6  -1 -15 5580.74 166.058   1
  -1 -15  -6 5716.12 189.584   1
  -6   0 -15-11.6435 19.0212   1
   0  15  -6-10.5531 24.9567   1
   0 -15  -6 3.95438 27.5859   1
  15   6   0 23.6042 28.3154   1
  15   6   1 5775.45 191.162   1
  -1  15  -6 5656.67 169.778   1
   1 -15  -6 5989.80 192.528   1
  -6   1 -15 5906.23 166.395   1
  15   6   2 3227.75 127.735   1
   2 -15  -6 3007.66 122.991   1
  -6   2 -15 3065.97 100.967   1
  -2  15  -6 3100.40 104.721   1
  -3  15  -6 966.687 48.7231   1
   3 -15  -6 976.575 65.7124   1
  15   6   3 818.801 63.5811   1
  -4  15  -6 902.591 46.0072   1
  15   6   4 921.248 66.7784   1
   4 -15  -6 963.983 64.2979   1
   5 -15  -6 2614.98 108.096   1
  15   6   5 2264.49 106.384   1
  15   6   6 240.345 42.8629   1
   6 -15  -6 225.019 38.1247   1
  15   6   7 12.3381 30.9190   1
   7  15   6 13.5442 35.0999   1
   8  15   6 5585.45 195.044   1
  15   6   8 5406.81 187.123   1
   9  15   6 3476.80 146.105   1
  15   6   9 3707.18 142.358   1
  15   6  10 50.8974 36.6489   1
  10  15   6 65.4339 36.5244   1
  11  15   6 167.410 46.2388   1
  15   6  11 101.213 36.5708   1
  -6  11 -15 157.701 16.2224   1
  12  15   6 2934.57 136.153   1
  -6  12 -15 2737.64 75.3731   1
  15   6  12 2746.25 121.964   1
  -6  13 -15 150.129 15.5451   1
  15   6  13 137.546 43.0521   1
  13  15   6 223.673 53.2375   1
  14  15   6 681.441 74.5789   1
  -6  14 -15 666.776 28.0366   1
 -15  -7 -14 216.834 43.6537   1
  14  15  -7 238.369 51.9686   1
  13  15  -7 1790.65 102.742   1
  -7 -13 -15 1710.64 100.696   1
 -15  -7 -13 1712.42 91.0413   1
 -15  -7 -12 4370.90 161.765   1
  12  15  -7 4708.75 175.830   1
  -7 -12 -15 4720.47 175.731   1
  11  15  -7 708.042 65.8161   1
  -7 -11 -15 801.536 67.8857   1
 -15  -7 -11 739.735 60.9650   1
  10  15  -7 1071.01 76.0150   1
 -15  -7 -10 1185.22 74.0958   1
  -7 -10 -15 1256.64 80.0050   1
  -9 -15  -7 512.123 56.9248   1
  -7  -9 -15 457.049 51.2662   1
   9  15  -7 389.688 47.6566   1
  15  -7   9 503.092 23.0586   1
   8  15  -7 1133.77 73.0687   1
  15  -7   8 1142.59 42.6364   1
  -8 -15  -7 1110.32 76.1813   1
  -7  -8 -15 1106.95 71.5322   1
   7  15  -7 188.808 36.1770   1
  15  -7   7 189.938 19.6809   1
  -7 -15  -7 122.647 35.9815   1
  -7  -7 -15 161.575 35.1320   1
   6  15  -7 562.782 51.0449   1
  15  -7   6 491.033 30.8564   1
  -6 -15  -7 529.580 55.8030   1
  -7  -6 -15 644.989 52.2803   1
  -5 -15  -7 379.546 49.8820   1
   5  15  -7 458.416 47.8545   1
  -7  -5 -15 522.943 47.8612   1
  -4 -15  -7 1876.94 99.7834   1
  -7  -4 -15 1911.79 87.2607   1
   4  15  -7 2109.95 92.6752   1
   3  15  -7 1916.02 86.7065   1
  -7  -3 -15 2013.32 86.1197   1
  -3 -15  -7 2065.77 100.573   1
  -7  -2 -15 3402.56 116.041   1
   2  15  -7 3381.50 119.207   1
  -7  -1 -15 437.152 36.5287   1
  -1 -15  -7 406.114 47.6088   1
  15   7  -1 411.907 47.8938   1
   1  15  -7 490.570 41.1611   1
   0 -15  -7 28.3334 28.9119   1
   0  15  -7 10.3684 19.8890   1
  -7   0 -15-2.34006 18.1930   1
  15   7   0 8.25866 28.3384   1
   1 -15  -7 430.037 46.9329   1
  15   7   1 328.718 45.6967   1
  -1  15  -7 453.634 38.0051   1
  -7   1 -15 433.524 34.4935   1
   2 -15  -7 3229.44 127.849   1
  -7   2 -15 3155.40 102.644   1
  -2  15  -7 3173.81 106.201   1
  15   7   2 3200.96 129.014   1
  15   7   3 1964.98 97.9465   1
  -3  15  -7 2030.19 75.3725   1
   3 -15  -7 2211.84 99.0424   1
  -7   3 -15 1954.51 72.2638   1
  -7   4 -15 2125.51 72.3064   1
  -4  15  -7 2079.23 74.0582   1
   4 -15  -7 2013.25 97.6998   1
  15   7   4 2108.99 102.100   1
  15   7   5 410.740 50.1017   1
   5 -15  -7 405.400 46.2919   1
  -7   5 -15 489.635 29.3339   1
  15   7   6 543.522 54.3600   1
  -7   6 -15 560.180 30.2008   1
   6 -15  -7 601.883 53.0748   1
   6  15   7 475.147 55.8872   1
  -7   7 -15 223.048 17.9866   1
  15   7   7 155.826 38.4493   1
   7  15   7 219.975 43.7975   1
  15   7   8 1083.95 75.1084   1
  -7   8 -15 1204.24 40.6436   1
   8  15   7 1226.65 82.3271   1
  -7   9 -15 485.160 21.6291   1
  15   7   9 430.949 53.3226   1
   9  15   7 537.787 57.6602   1
  15   7  10 1210.98 78.2440   1
  10  15   7 1206.14 82.5588   1
  -7  10 -15 1054.04 33.1358   1
  -7  10 -15 1121.65 32.9517   1
  11  15   7 723.359 72.0116   1
  15   7  11 798.521 66.7900   1
  12  15   7 4594.56 181.746   1
  15   7  12 4550.18 169.121   1
  13  15   7 1874.08 110.479   1
  15   7  13 1714.88 95.0396   1
  14  15   7 180.228 51.9204   1
  -8 -14 -15 5264.63 192.088   1
 -15  -8 -14 4796.34 175.664   1
  14  15  -8 4876.19 187.778   1
 -15  -8 -13 2018.37 101.295   1
  13  15  -8 1994.04 109.699   1
  -8 -13 -15 2068.80 111.009   1
  -8 -12 -15 398.357 54.3963   1
 -15  -8 -12 352.189 49.1890   1
 -15  -8 -11 4.12267 35.0337   1
  -8 -11 -15-9.32124 34.2990   1
  11  15  -8-9.38503 38.1030   1
  10  15  -8 116.414 39.9988   1
  -8 -10 -15 173.705 42.2574   1
 -15  -8 -10 150.264 37.8765   1
   9  15  -8 1813.41 95.5854   1
  -8  -9 -15 1902.17 97.6665   1
  15  -8   8 38.7840 11.1002   1
   8  15  -8 24.4006 30.5791   1
  -8  -8 -15-4.04599 28.9070   1
  -8 -15  -8 9.45148 34.2766   1
   7  15  -8 77.0343 31.1241   1
  -8  -7 -15 38.4344 30.1096   1
  15  -8   7 74.9445 14.2661   1
  -7 -15  -8 46.4514 29.7134   1
  15  -8   6 175.521 19.1980   1
   6  15  -8 109.599 31.4008   1
  -8  -6 -15 152.435 32.3370   1
  -6 -15  -8 133.459 37.0792   1
  -5 -15  -8 9263.75 285.549   1
   5  15  -8 9242.04 270.670   1
  -8  -5 -15 10075.8 272.996   1
   4  15  -8 230.131 35.6088   1
  -4 -15  -8 235.137 44.2785   1
  -8  -4 -15 263.181 37.3609   1
  -3 -15  -8 4973.43 177.547   1
   3  15  -8 5031.01 160.400   1
  -8  -3 -15 4979.92 159.462   1
  15   8  -2 8.59933 32.3236   1
   2  15  -8-5.82222 21.5793   1
  -2 -15  -8-13.0369 30.0704   1
  -8  -2 -15-16.7490 24.6082   1
  15   8  -1 515.573 52.5514   1
   1  15  -8 537.232 41.8021   1
  -1 -15  -8 442.333 49.5304   1
  -8  -1 -15 495.984 40.4117   1
   0  15  -8-2.55648 20.2583   1
   0 -15  -8 8.36339 26.9715   1
  15   8   0-4.29001 29.4406   1
  -8   0 -15-9.58729 19.6925   1
  15   8   1 553.722 53.7192   1
  -1  15  -8 540.947 40.2351   1
  -8   1 -15 558.162 38.3983   1
   1 -15  -8 559.121 52.5958   1
  -8   2 -15 27.9504 17.5104   1
  -2  15  -8-8.71065 20.1430   1
   2 -15  -8 16.0317 28.6281   1
  15   8   2-25.7079 32.8747   1
   3 -15  -8 4988.94 172.875   1
  15   8   3 5144.86 179.063   1
  -8   3 -15 5086.05 143.372   1
  -3  15  -8 4967.37 144.970   1
  -4  15  -8 241.690 24.6694   1
  -8   4 -15 244.613 25.3331   1
  15   8   4 174.447 39.1879   1
   4 -15  -8 271.411 42.1506   1
   5 -15  -8 9560.02 274.591   1
  -8   5 -15 9251.11 232.511   1
  15   8   5 9358.23 281.248   1
   6  15   8 141.781 40.6457   1
  -8   6 -15 154.223 16.6873   1
  15   8   6 90.1073 36.9389   1
  15   8   7 31.8423 33.0133   1
   7  15   8 46.8665 34.5147   1
  -8   7 -15 63.0705 12.1890   1
   8  15   8-4.80354 34.5803   1
  15   8   8-18.5559 38.9960   1
  -8   8 -15 37.3192 9.37613   1
  15   8   9 1684.91 94.8644   1
   9  15   8 1574.91 95.8518   1
  10  15   8 46.2017 41.4754   1
  15   8  10 116.752 39.7275   1
  11  15   8-31.6507 46.7356   1
  15   8  11 9.32053 34.5445   1
  15   8  12 451.969 55.6399   1
  12  15   8 549.637 65.2564   1
  13  15   8 1981.93 116.449   1
  15   8  13 2137.77 108.117   1
  14  15   8 5057.48 198.192   1
 -15  -9 -14 22.5077 39.0773   1
  14  15  -9 53.4116 42.5895   1
 -14 -15  -9-32.4665 46.7270   1
  -9 -14 -15 15.9870 43.7842   1
  13  15  -9 717.503 69.7618   1
  -9 -13 -15 854.741 76.0509   1
 -15  -9 -13 736.211 66.9158   1
  12  15  -9 417.757 57.7790   1
 -15  -9 -12 392.308 53.5561   1
  -9 -12 -15 374.424 56.4154   1
  -9 -11 -15-42.2007 41.1268   1
  11  15  -9-32.9395 41.4831   1
 -15  -9 -11 26.0634 34.4245   1
  10  15  -9 481.999 54.1873   1
 -15  -9 -10 453.452 52.3994   1
  -9 -10 -15 524.245 55.2106   1
   9  15  -9 4571.09 166.058   1
  -9  -9 -15 4550.02 166.026   1
   8  15  -9 1651.28 89.6657   1
  -9  -8 -15 1686.56 88.9453   1
   7  15  -9 3588.46 138.218   1
  15  -9   7 3667.06 96.9161   1
  -7 -15  -9 3527.20 147.770   1
  -9  -7 -15 3755.36 139.493   1
   6  15  -9 66.3226 29.5834   1
  -6 -15  -9 23.5154 33.6136   1
  -9  -6 -15 62.4926 27.2735   1
  -5 -15  -9 180.472 39.9510   1
   5  15  -9 187.510 35.1713   1
  -9  -5 -15 173.118 33.9808   1
  -9  -4 -15 26.0678 26.3006   1
   4  15  -9-22.9569 26.6298   1
  -4 -15  -9 9.12182 29.4172   1
  15   9  -3 554.876 53.6068   1
  -9  -3 -15 533.519 45.5337   1
   3  15  -9 596.155 47.6810   1
  -3 -15  -9 545.163 54.2491   1
   2  15  -9 845.799 53.7741   1
  -9  -2 -15 951.160 56.1093   1
  15   9  -2 893.338 66.7211   1
  -2 -15  -9 879.027 68.0778   1
  -9  -1 -15 2818.48 101.438   1
   1  15  -9 2741.47 101.567   1
  15   9  -1 2740.74 120.946   1
  -1 -15  -9 2551.00 117.222   1
   0 -15  -9-4.28259 27.6221   1
  15   9   0 13.2629 30.3393   1
  -9   0 -15 12.1115 17.6970   1
   0  15  -9-7.56099 18.9469   1
  -9   1 -15 2756.27 95.9541   1
   1 -15  -9 2636.01 117.266   1
  15   9   1 2763.92 122.788   1
  -1  15  -9 2836.88 98.2347   1
  -2  15  -9 909.961 49.5339   1
  15   9   2 1046.64 72.0500   1
   2 -15  -9 913.813 65.6549   1
  -9   2 -15 1015.99 49.1207   1
  -3  15  -9 505.649 35.3909   1
   3 -15  -9 570.624 51.4759   1
  -9   3 -15 561.384 35.2163   1
  15   9   3 608.411 57.9143   1
  15   9   4-4.58137 30.6447   1
   4 -15  -9 8.19720 29.5006   1
  -4  15  -9-3.27955 15.8492   1
  -9   4 -15-19.9624 18.7042   1
  15   9   5 218.368 43.6062   1
  -9   5 -15 201.576 20.4446   1
   5 -15  -9 243.226 43.3007   1
  -5  15  -9 195.091 21.1879   1
  15   9   6-4.69222 39.0004   1
  -9   6 -15 28.3477 12.3418   1
  15   9   7 3426.94 145.126   1
  -9   7 -15 3506.78 90.3779   1
   7  15   9 3787.22 150.144   1
   8  15   9 1548.49 93.9195   1
  15   9   8 1504.45 92.5206   1
   9  15   9 4462.38 175.005   1
  15   9   9 4611.01 173.006   1
  15   9  10 492.010 57.3227   1
  10  15   9 487.955 59.9011   1
  11  15   9-5.35603 42.9714   1
  15   9  11-24.3772 41.4323   1
  12  15   9 303.876 57.2799   1
  15   9  12 443.970 55.5716   1
  13  15   9 572.537 70.8368   1
  15   9  13 771.698 69.8254   1
  14  15   9 40.8922 46.3043   1
  15   9  14 55.9972 41.5956   1
 -14 -15 -10 6908.65 235.938   1
 -15 -10 -14 6519.30 223.048   1
  14  15 -10 6541.12 230.671   1
 -10 -14 -15 6826.71 232.637   1
  13  15 -10 1041.13 82.5138   1
 -13 -15 -10 1095.67 84.6442   1
 -10 -13 -15 1126.96 85.2373   1
 -15 -10 -13 1113.71 81.3057   1
  12  15 -10 3149.55 139.858   1
 -15 -10 -12 3439.44 140.050   1
 -10 -12 -15 3058.93 138.849   1
 -15 -10 -11 1277.48 82.1670   1
  11  15 -10 1139.43 81.7092   1
 -10 -11 -15 1008.46 77.0297   1
 -10 -10 -15 104.464 40.8952   1
  10  15 -10 130.792 41.1946   1
 -15 -10 -10 62.7594 36.6792   1
 -10  -9 -15 13.0213 33.9726   1
   9  15 -10 56.0973 37.6623   1
 -15 -10  -9 53.2651 38.5403   1
 -10  -8 -15 91.2061 34.4979   1
   8  15 -10 61.7246 35.7615   1
 -10  -7 -15 62.8163 34.5281   1
   7  15 -10 66.6319 32.3044   1
  15 -10   7 128.012 12.3896   1
   6  15 -10 3304.66 129.093   1
  -6 -15 -10 3606.22 146.221   1
 -10  -6 -15 3460.24 132.633   1
   5  15 -10 3202.04 124.023   1
  -5 -15 -10 3258.90 137.181   1
 -10  -5 -15 3256.47 125.195   1
 -10  -4 -15 1425.56 74.9662   1
   4  15 -10 1458.45 76.2063   1
  -4 -15 -10 1396.71 85.0241   1
  15  10  -4 1392.26 85.7465   1
  -3 -15 -10 51.0531 30.8529   1
   3  15 -10 111.286 28.1538   1
 -10  -3 -15 98.3315 27.5871   1
  15  10  -3 171.792 40.5761   1
  15  10  -2 69.6793 34.9432   1
   2  15 -10 67.0743 22.8520   1
  -2 -15 -10 91.1940 36.3783   1
 -10  -2 -15 25.7361 24.5938   1
  -1 -15 -10 205.851 39.8262   1
  15  10  -1 166.184 41.4771   1
   1  15 -10 151.371 27.6687   1
 -10  -1 -15 171.862 29.6861   1
 -10   0 -15 2.43181 19.6285   1
   0 -15 -10 13.1160 31.2285   1
   0  15 -10 7.52888 20.2566   1
  15  10   0-4.62945 33.0674   1
  15  10   1 194.563 40.8393   1
 -10   1 -15 183.696 25.7496   1
   1 -15 -10 133.741 37.2881   1
  -1  15 -10 211.518 27.4001   1
 -10   2 -15 78.7908 20.1890   1
  -2  15 -10 59.4322 20.6617   1
   2 -15 -10 77.0266 33.5213   1
  15  10   2 79.2627 36.2826   1
 -10   3 -15 146.890 21.2901   1
  -3  15 -10 115.212 21.0880   1
  15  10   3 99.0644 37.4869   1
   3 -15 -10 123.021 33.9413   1
  -4  15 -10 1470.27 57.8829   1
  15  10   4 1545.43 90.8834   1
 -10   4 -15 1557.26 56.8523   1
   4 -15 -10 1380.74 83.0552   1
  15  10   5 3178.20 136.798   1
 -10   5 -15 3035.79 87.6156   1
  -5  15 -10 2950.05 88.9641   1
 -10   6 -15 3324.75 89.2716   1
  15  10   6 3412.98 144.435   1
  15  10   7 114.792 42.0266   1
  15  10   8 60.5561 38.2227   1
   9  15  10-36.1988 44.1824   1
  15  10   9 35.5538 39.9957   1
  15  10  10 96.4002 41.9873   1
  10  15  10 105.845 45.7549   1
  15  10  11 1151.68 84.3300   1
  11  15  10 1283.68 89.7455   1
  12  15  10 3351.36 151.549   1
  15  10  12 3326.65 145.126   1
  13  15  10 1074.14 86.3466   1
  15  10  13 880.765 76.8094   1
  14  15  10 6898.21 241.929   1
  15  10  14 6716.59 233.597   1
 -11 -14 -15 939.673 80.3485   1
  14  15 -11 897.769 79.0174   1
 -15 -11 -14 931.798 77.8685   1
 -14 -15 -11 977.934 82.5157   1
 -15 -11 -13 654.725 67.3473   1
  13  15 -11 721.458 72.3360   1
 -11 -13 -15 814.712 75.0465   1
 -13 -15 -11 738.641 72.5268   1
 -15 -11 -12 111.121 42.6117   1
 -12 -15 -11-5.34376 45.1838   1
  12  15 -11 59.7296 42.7771   1
 -11 -12 -15 95.0965 41.6202   1
  11  15 -11 871.988 71.6786   1
 -11 -11 -15 817.672 68.9668   1
 -15 -11 -11 808.367 69.1345   1
  10  15 -11 59.2114 38.4999   1
 -15 -11 -10 32.9521 40.4408   1
 -11 -10 -15 4.59900 33.8519   1
 -11  -9 -15 7935.25 244.929   1
   9  15 -11 7867.64 243.400   1
 -15 -11  -9 7543.22 246.797   1
   8  15 -11-37.2775 34.8138   1
 -11  -8 -15 20.8845 35.6880   1
 -11  -7 -15 1401.12 81.2949   1
   7  15 -11 1492.66 83.5052   1
   6  15 -11 1061.63 69.2795   1
 -11  -6 -15 1093.34 70.2474   1
   5  15 -11 21.2894 30.1533   1
 -11  -5 -15-3.53173 32.5182   1
  15  11  -5 62.8541 36.8493   1
  -5 -15 -11-38.8853 39.2335   1
  15  11  -4 101.226 39.9727   1
   4  15 -11 127.066 32.6238   1
  -4 -15 -11 144.430 40.6014   1
 -11  -4 -15 232.140 38.7882   1
  15  11  -3 144.536 41.9686   1
   3  15 -11 175.524 33.6221   1
  -3 -15 -11 213.391 43.1926   1
 -11  -3 -15 120.869 30.7762   1
   2  15 -11 697.287 48.6478   1
  15  11  -2 518.125 59.0995   1
 -11  -2 -15 585.868 46.8390   1
  -2 -15 -11 625.150 60.4548   1
  -1 -15 -11 6047.26 199.137   1
   1  15 -11 5688.84 172.271   1
  15  11  -1 5443.30 196.638   1
 -11  -1 -15 5587.25 170.718   1
   0  15 -11-5.01119 21.8640   1
  15  11   0-19.2326 34.6074   1
 -11   0 -15-2.42754 20.1764   1
   0 -15 -11-22.4578 33.7664   1
   1 -15 -11 5649.57 196.933   1
  15  11   1 5544.11 199.390   1
 -11   1 -15 5841.31 165.930   1
  -1  15 -11 5899.17 168.311   1
   2 -15 -11 539.174 55.7106   1
 -11   2 -15 604.536 37.7410   1
  15  11   2 491.610 56.6564   1
  -2  15 -11 575.298 39.7352   1
 -11   3 -15 220.959 25.4495   1
   3 -15 -11 224.182 42.5157   1
  -3  15 -11 163.445 23.9944   1
  15  11   3 153.438 42.2735   1
  -4  15 -11 166.585 23.5376   1
   4 -15 -11 119.381 37.3275   1
  15  11   4 210.052 45.5381   1
 -11   4 -15 151.202 19.9857   1
  15  11   5 55.6697 42.5382   1
 -11   5 -15 14.3039 13.3720   1
  15  11   6 1051.17 79.2879   1
  15  11   7 1281.33 89.7582   1
  15  11   8-5.24412 44.8051   1
  15  11   9 7698.96 255.916   1
  15  11  10 121.276 48.7918   1
  10  15  11 21.6936 41.9108   1
  15  11  11 977.830 77.5375   1
  11  15  11 823.433 78.0071   1
  12  15  11 124.733 49.2448   1
  15  11  12 48.2437 37.7321   1
  13  15  11 985.725 81.9367   1
  15  11  13 831.378 77.7059   1
  15  11  14 770.330 77.9434   1
  14  15  11 1020.05 86.8098   1
 -14 -15 -12 233.280 53.5820   1
 -15 -12 -14 370.387 58.3344   1
 -12 -14 -15 234.561 57.1056   1
 -13 -15 -12 350.825 56.7779   1
 -12 -13 -15 235.596 53.4613   1
 -15 -12 -13 270.252 51.0995   1
 -15 -12 -12 85.7579 41.9395   1
 -12 -15 -12 43.1593 43.2952   1
 -12 -12 -15 20.1391 39.6614   1
 -15 -12 -11 739.737 69.4598   1
 -12 -11 -15 743.417 67.2234   1
 -11 -15 -12 750.427 73.7123   1
 -12 -10 -15 133.981 43.4014   1
 -15 -12 -10 108.255 42.1278   1
 -12  -9 -15 246.841 48.4203   1
 -15 -12  -9 213.965 49.3905   1
 -12  -8 -15 3138.78 130.192   1
   7  15 -12 3174.21 127.361   1
 -12  -7 -15 2987.45 125.386   1
 -12  -6 -15 1559.73 82.9846   1
   6  15 -12 1549.25 83.3570   1
  15 -12   6 1431.30 47.9083   1
   5  15 -12 14697.9 390.152   1
  15  12  -5 14320.6 410.672   1
 -12  -5 -15 15022.9 391.435   1
   4  15 -12 33.6770 34.1578   1
  15  12  -4 69.9169 43.3580   1
  -4 -15 -12 24.7217 40.3932   1
 -12  -4 -15 23.3628 32.1294   1
 -12  -3 -15 6970.62 205.662   1
  -3 -15 -12 6962.20 231.221   1
   3  15 -12 6936.53 207.046   1
  15  12  -3 6775.59 230.432   1
  -2 -15 -12 2000.71 107.228   1
  15  12  -2 2136.72 111.473   1
 -12  -2 -15 2142.48 89.6886   1
   2  15 -12 2126.92 90.0449   1
 -12  -1 -15 1252.46 63.5607   1
  -1 -15 -12 1230.84 82.4580   1
   1  15 -12 1317.89 65.7329   1
  15  12  -1 1121.75 82.8123   1
  15  12   0-14.9362 38.2000   1
   0  15 -12 5.06834 22.3396   1
 -12   0 -15-2.43246 21.0054   1
   0 -15 -12-27.7139 36.1418   1
 -12   1 -15 1412.17 63.0145   1
  -1  15 -12 1381.54 63.5889   1
  15  12   1 1265.22 86.2400   1
   1 -15 -12 1426.38 86.0926   1
 -12   2 -15 2185.93 78.7365   1
   2 -15 -12 2157.32 107.566   1
  15  12   2 2279.53 115.018   1
  -2  15 -12 2080.06 79.8976   1
   3 -15 -12 7441.31 230.434   1
 -12   3 -15 6718.60 184.265   1
  -3  15 -12 7043.92 189.181   1
  15  12   3 7190.56 236.608   1
 -12   4 -15 50.9626 17.6853   1
  -4  15 -12 52.4421 20.9672   1
  15  12   4 57.3316 43.8238   1
   4 -15 -12 87.2427 37.3052   1
  15  12   5 15362.3 431.132   1
  15  12   6 1688.35 102.320   1
  15  12   7 3336.64 149.283   1
  15  12   8 3569.58 156.302   1
  15  12   9 180.626 50.5561   1
  15  12  10 103.811 44.6882   1
  15  12  11 785.773 73.0086   1
  15  12  12 77.9843 42.4694   1
  12  15  12 28.9269 44.4048   1
  15  12  13 480.239 65.2605   1
  13  15  12 419.226 61.5962   1
  14  15  12 351.121 63.0356   1
 -15 -13 -14 2512.10 126.923   1
 -13 -14 -15 2290.34 123.877   1
 -14 -15 -13 2185.58 123.291   1
 -13 -15 -13 479.976 64.9365   1
 -15 -13 -13 398.523 59.3290   1
 -13 -13 -15 371.796 59.4907   1
 -15 -13 -12 63.1096 46.1483   1
 -12 -15 -13 60.2245 46.0395   1
 -13 -12 -15 71.4041 43.1295   1
 -15 -13 -11 271.068 54.6117   1
 -11 -15 -13 313.577 55.5919   1
 -13 -11 -15 258.786 52.2851   1
 -15 -13 -10 724.125 72.0311   1
 -10 -15 -13 695.990 72.1746   1
 -13 -10 -15 840.911 72.5754   1
 -13  -9 -15 1627.01 93.7375   1
 -15 -13  -9 1426.93 94.2971   1
 -13  -8 -15 3743.86 146.410   1
 -13  -7 -15 406.943 52.0312   1
 -13  -6 -15 3415.69 132.208   1
  15 -13   6 3390.23 91.7112   1
 -13  -5 -15 1108.59 69.7947   1
  15 -13   5 1221.20 47.8984   1
   5  15 -13 1059.88 70.9764   1
  15  13  -4 519.328 63.4732   1
   4  15 -13 554.248 52.7871   1
 -13  -4 -15 454.980 50.2561   1
 -13  -3 -15 525.924 48.1419   1
  15  13  -3 444.219 61.8964   1
  -3 -15 -13 432.149 58.1358   1
   3  15 -13 437.765 44.9691   1
  -2 -15 -13 107.903 46.0517   1
  15  13  -2 51.4869 44.5275   1
   2  15 -13 155.965 33.2794   1
 -13  -2 -15 99.5825 29.9132   1
  -1 -15 -13 542.489 59.9613   1
   1  15 -13 522.361 44.0434   1
 -13  -1 -15 567.646 43.3339   1
  15  13  -1 462.631 59.8576   1
   0 -15 -13-19.0691 37.0638   1
  15  13   0 5.16835 36.0564   1
   0  15 -13 45.6761 24.9361   1
 -13   0 -15 12.2465 23.5748   1
  15  13   1 427.858 58.9151   1
  -1  15 -13 507.018 39.7133   1
 -13   1 -15 440.246 36.5204   1
  -2  15 -13 66.9010 24.7285   1
   2 -15 -13 103.445 37.3172   1
 -13   2 -15 97.8327 23.9836   1
  15  13   2 143.183 45.1117   1
  -3  15 -13 455.866 35.8052   1
  15  13   3 535.548 64.3889   1
   3 -15 -13 537.522 58.5816   1
 -13   3 -15 477.977 33.4316   1
  15  13   4 535.555 64.1541   1
  -4  15 -13 533.965 34.8000   1
  15  13   5 1077.78 85.8321   1
  15  13   6 3675.38 161.049   1
  -6  15 -13 3671.25 95.7514   1
  15  13   7 241.448 57.6231   1
  15  13   8 3640.49 159.898   1
  15  13   9 1390.99 98.4418   1
  15  13  10 720.187 75.5640   1
  15  13  11 338.223 57.0559   1
  15  13  12 52.0255 47.2309   1
  15  13  13 409.819 65.4254   1
  14  15  13 2773.18 141.394   1
 -15 -14 -14 2243.30 122.212   1
 -14 -15 -14 2147.79 123.457   1
 -14 -14 -15 2213.09 121.772   1
 -14 -13 -15 253.459 57.4043   1
 -15 -14 -13 243.008 56.0667   1
 -13 -15 -14 253.539 59.1137   1
 -14 -12 -15 5377.96 198.443   1
 -15 -14 -12 5510.44 205.736   1
 -12 -15 -14 5424.54 204.054   1
 -15 -14 -11 2349.47 123.285   1
 -14 -11 -15 2221.83 116.975   1
 -11 -15 -14 2369.21 124.189   1
 -15 -14 -10-10.6989 44.9615   1
 -14 -10 -15-14.2110 40.6893   1
 -10 -15 -14 21.9014 42.2892   1
  -9 -15 -14 6112.94 218.643   1
  15  14  -9 5901.66 214.348   1
 -14  -9 -15 6282.33 208.233   1
 -15 -14  -9 5887.28 213.599   1
  -8 -15 -14 893.085 77.6252   1
 -14  -8 -15 925.636 69.4429   1
 -15 -14  -8 915.380 76.6087   1
 -14  -7 -15 1248.30 79.4986   1
  15 -14   6 416.931 24.9313   1
 -14  -6 -15 489.464 53.6172   1
  15 -14   5 3260.89 97.3734   1
 -14  -5 -15 3425.71 129.308   1
 -14  -4 -15 1722.83 86.4360   1
  15 -14   4 1747.28 65.5131   1
  15  14  -3 3329.64 150.896   1
   3  15 -14 3321.19 126.333   1
 -14  -3 -15 3639.48 127.792   1
  15  14  -2 1012.53 85.0174   1
   2  15 -14 1105.64 63.7888   1
 -14  -2 -15 1063.09 62.4866   1
  -2 -15 -14 1058.42 82.7473   1
  -1 -15 -14 5293.65 198.482   1
   1  15 -14 5896.85 175.028   1
  15  14  -1 5628.62 208.409   1
 -14  -1 -15 5834.62 173.313   1
   0 -15 -14 19.6794 39.2342   1
   0  15 -14 31.1116 25.3789   1
  15  14   0 37.5689 45.1137   1
 -14   0 -15 27.5286 24.2966   1
  -1  15 -14 5583.04 165.586   1
   1 -15 -14 5676.36 200.814   1
 -14   1 -15 5765.24 164.358   1
  15  14   1 5586.73 208.027   1
   2 -15 -14 1220.38 83.1416   1
  -2  15 -14 1195.28 57.5508   1
  15  14   2 1263.65 89.8803   1
  15  14   3 3742.02 157.866   1
   3 -15 -14 3588.33 148.355   1
  -3  15 -14 3474.04 110.533   1
  15  14   4 1708.68 104.218   1
  -4  15 -14 1595.72 61.5593   1
  15  14   5 3444.07 154.561   1
  -6  15 -14 456.658 22.9521   1
  15  14   6 474.311 65.2208   1
  15  14   7 1085.96 87.4876   1
  15  14   8 837.173 78.1372   1
  15  14   9 6004.01 221.329   1
  15  14  10 5.86458 42.5293   1
  15  14  11 2349.62 127.612   1
  15  14  12 5461.23 211.025   1
  15  14  13 200.425 62.4479   1
 -15 -15 -15 1710.82 109.539   1
 -15 -15 -14 5.79351 48.9855   1
 -15 -14 -15 129.466 52.3247   1
 -14 -15 -15 69.7695 52.8028   1
 -15 -13 -15 509.551 67.9938   1
 -13 -15 -15 508.600 71.5642   1
 -15 -15 -13 631.911 73.8836   1
 -12 -15 -15 1435.99 97.5936   1
 -15 -12 -15 1501.88 96.8879   1
 -15 -15 -12 1358.26 97.2709   1
  15  15 -11 191.350 50.9980   1
 -15 -11 -15 125.062 49.9016   1
 -15 -15 -11 107.104 52.9971   1
  15  15 -10 22.3647 43.1888   1
 -15 -15 -10 127.858 50.2304   1
 -10 -15 -15 44.7608 44.3416   1
 -15 -10 -15-33.5038 44.4786   1
 -15  -9 -15 4.56775 39.4439   1
  -9 -15 -15-16.6296 41.6718   1
  15  15  -9 27.7967 42.9383   1
 -15 -15  -9-38.4530 44.3390   1
  -8 -15 -15 2675.20 131.648   1
  15  15  -8 2365.03 126.023   1
 -15  -8 -15 2572.41 116.409   1
 -15 -15  -8 2470.08 126.787   1
 -15  -7 -15 685.361 61.4670   1
  -7 -15 -15 586.579 71.0284   1
 -15  -6 -15 1070.48 72.0748   1
  15 -15   6 1181.19 41.6699   1
 -15  -5 -15 3223.68 127.934   1
  15 -15   5 3332.31 99.0264   1
  15 -15   4 992.558 49.5398   1
 -15  -4 -15 1205.24 70.1683   1
  15 -15   3 4049.44 124.828   1
 -15  -3 -15 4053.78 141.592   1
   2  15 -15 2256.17 94.2033   1
 -15  -2 -15 2166.29 92.6571   1
  15  15  -2 2180.05 120.456   1
 -15  -1 -15 771.789 52.8430   1
  15  15  -1 629.436 73.7445   1
  -1 -15 -15 715.966 71.0343   1
   1  15 -15 764.501 52.9659   1
   0  15 -15 82.0140 32.2455   1
  15  15   0-16.6775 48.0196   1
   0 -15 -15 65.7524 44.3764   1
  -1  15 -15 677.275 47.1928   1
   1 -15 -15 708.877 69.3462   1
  15  15   1 627.095 73.7350   1
  -2  15 -15 2081.26 79.9855   1
   2 -15 -15 2042.68 110.224   1
  15  15   2 2106.88 118.451   1
  15  15   3 3920.14 167.418   1
  -3  15 -15 3902.65 119.844   1
   3 -15 -15 4026.10 160.691   1
  -4  15 -15 1058.22 48.4168   1
  15  15   4 918.911 83.0452   1
  15  15   5 3612.25 161.673   1
  15  15   6 1125.95 91.7516   1
  -6  15 -15 1272.33 40.9674   1
  15  15   7 873.181 81.3130   1
  15  15   8 2459.81 131.368   1
  15  15   9 30.1673 44.4072   1
  15  15  10 85.0678 50.2480   1
  15  15  11 251.590 57.2942   1
  15  15  12 1464.73 103.829   1
  15  15  13 605.387 75.3382   1
   0  16   0 12197.5 322.516   1
   0 -16   0 11750.0 325.250   1
  -1  16   0 15.2592 24.1834   1
   1 -16   0-3.37153 27.8611   1
  -1 -16   0-7.10746 27.6275   1
   1  16   0-3.31623 29.8178   1
  -2 -16   0 154.645 36.4413   1
   2 -16   0 119.083 33.2832   1
   2  16   0 121.281 32.9070   1
   3  16   0-25.6834 35.3118   1
  -3 -16   0-3.76686 30.2214   1
   3 -16   0 32.2727 26.3620   1
  16   0   3-40.4647 31.8043   1
  -4 -16   0 2422.85 110.229   1
   4 -16   0 2405.58 99.0658   1
  16   0   4 2446.60 99.7755   1
   4  16   0 2535.78 109.876   1
  16   0   5-9.10086 26.6071   1
  -5 -16   0-16.2448 32.5821   1
   5  16   0-36.2335 39.5582   1
   5 -16   0 18.6401 24.9245   1
  16   0   6 6.04971 25.5650   1
   6  16   0 25.1845 33.4689   1
  -6 -16   0-20.7997 37.5855   1
   6 -16   0 18.3343 22.8121   1
  -7 -16   0-25.7797 32.5276   1
   7 -16   0 5.95758 22.7078   1
   7  16   0-56.7032 39.0313   1
   8  16   0 3540.78 143.947   1
  16   0   8 3754.17 129.019   1
   8 -16   0 3526.55 124.759   1
   9 -16   0 22.9148 22.8414   1
  16   0   9 6.07497 22.9948   1
  16   0  10 781.980 54.4278   1
  10 -16   0 823.859 52.6361   1
  16   0  11 38.1835 29.7936   1
  11 -16   0 31.1735 26.3441   1
  12 -16   0 3066.28 109.643   1
  16   0  12 2823.78 109.081   1
  13 -16   0-26.0140 32.3971   1
  14  16   0 3883.55 167.720   1
   0  15 -16 13.4021 28.8909   1
   0 -15 -16-15.6111 46.1032   1
  15  16   0 40.5990 49.2866   1
  15  16  -1 6515.60 227.147   1
   1  15 -16 5996.04 185.140   1
  14 -16   1 2733.89 102.488   1
  13 -16   1 10908.9 288.665   1
  12 -16   1 13.2635 23.7411   1
  16  -1  12 34.2136 25.5473   1
  11 -16   1 5982.20 175.819   1
  16  -1  11 5812.47 175.007   1
  10 -16   1 134.258 27.3812   1
  16  -1  10 123.936 30.5154   1
   9 -16   1 1323.84 64.5205   1
   9  16  -1 1151.50 80.9685   1
  16  -1   9 1143.75 62.2891   1
  -8 -16  -1 120.915 35.1277   1
  16  -1   8 132.806 27.3055   1
   8 -16   1 100.216 25.7490   1
   8  16  -1 80.3776 36.5573   1
  -7 -16  -1 26.1395 31.3576   1
   7  16  -1-34.1470 36.8592   1
   7 -16   1 34.1110 22.1002   1
  16  -1   7 11.2282 24.6204   1
   6  16  -1 6948.80 218.138   1
   6 -16   1 6701.77 197.684   1
  16  -1   6 6597.86 195.978   1
  -6 -16  -1 6694.51 216.841   1
   5 -16   1 2032.86 87.9556   1
   5  16  -1 1939.86 97.7084   1
  16  -1   5 2035.03 85.7319   1
  -5 -16  -1 1978.50 99.3107   1
  -4 -16  -1 13942.7 376.752   1
   4  16  -1 14172.7 376.144   1
  16  -1   4 13749.8 359.383   1
   4 -16   1 13693.0 361.628   1
  -3 -16  -1 8034.69 245.938   1
   3  16  -1 8296.87 243.535   1
   3 -16   1 8229.19 235.639   1
   2 -16   1 2850.08 112.209   1
  -2 -16  -1 3113.99 123.663   1
   2  16  -1 3290.94 121.710   1
  -1 -16  -1 4207.13 150.062   1
   1 -16   1 4140.82 144.207   1
   1  16  -1 4330.13 145.429   1
   0  16   1 2719.16 110.487   1
   0 -16  -1 3011.29 117.148   1
   0 -16   1 2855.67 112.902   1
   0  16  -1 2937.28 110.452   1
  -1  16  -1 4333.40 141.863   1
   1  16   1 4374.59 148.861   1
   1 -16  -1 4144.53 148.603   1
  -1 -16   1 4283.30 148.646   1
   2 -16  -1 3101.99 118.783   1
  -2 -16   1 3044.72 119.634   1
   2  16   1 2946.52 119.190   1
  -3 -16   1 8054.89 244.991   1
   3  16   1 8364.42 246.359   1
   3 -16  -1 8370.82 242.325   1
  16   1   3 8294.68 239.578   1
   4  16   1 13789.9 374.533   1
   4 -16  -1 13510.4 364.641   1
  16   1   4 13847.1 364.619   1
  -4 -16   1 14108.6 375.268   1
  16   1   5 1782.66 85.3410   1
  -5 -16   1 1930.36 96.0143   1
   5  16   1 1792.54 93.7804   1
   5 -16  -1 1946.06 87.7170   1
   6  16   1 6797.22 224.534   1
  16   1   6 7258.81 212.390   1
   6 -16  -1 7237.65 212.614   1
   7 -16  -1 21.8259 21.9312   1
   7  16   1 13.3102 35.1610   1
  16   1   7 26.0018 25.5985   1
  16   1   8 114.060 30.6987   1
   8 -16  -1 149.432 28.7467   1
  16   1   9 1293.65 69.5538   1
   9 -16  -1 1253.38 66.7516   1
  10 -16  -1 189.655 29.9984   1
  16   1  10 104.031 30.1109   1
  11 -16  -1 6000.41 181.625   1
  16   1  11 5784.02 182.290   1
  16   1  12 3.18058 29.4241   1
  12 -16  -1 45.9378 30.4608   1
  13  16   1 10699.7 326.644   1
  16   1  13 10580.5 291.435   1
  14  16   1 2812.40 139.331   1
   1 -14 -16 2703.55 129.170   1
  -1  15 -16 6138.89 177.659   1
   1 -15 -16 5714.01 212.219   1
  15  16   1 6376.19 226.121   1
  15 -16   2 91.9225 27.6553   1
  14 -16   2 1937.85 79.6032   1
  13 -16   2-7.34512 22.3334   1
  16  -2  12 919.975 50.6126   1
  12 -16   2 926.655 51.8661   1
  16  -2  11 342.462 34.4141   1
  11 -16   2 345.926 34.0945   1
  10  16  -2 1222.56 83.9173   1
  10 -16   2 1300.44 63.5493   1
  16  -2  10 1307.16 63.3060   1
  -2 -10 -16 1294.15 79.6038   1
  -9 -16  -2 670.412 61.8516   1
  16  -2   9 747.540 48.1529   1
  -2  -9 -16 841.988 63.2222   1
   9 -16   2 708.981 46.9783   1
   9  16  -2 735.107 64.9112   1
  -8 -16  -2 1820.52 95.5438   1
  -2  -8 -16 1511.39 85.0141   1
  16  -2   8 1637.36 72.6283   1
   8 -16   2 1599.79 72.1573   1
   8  16  -2 1683.94 92.8116   1
   7  16  -2 1961.97 100.497   1
  16  -2   7 2043.90 82.7780   1
  -7 -16  -2 1929.77 100.145   1
   7 -16   2 1931.17 81.7658   1
   6  16  -2 966.050 68.6112   1
  16  -2   6 965.202 55.2975   1
   6 -16   2 1067.87 59.0999   1
  -6 -16  -2 1091.00 73.2829   1
  16  -2   5 518.295 43.9594   1
   5  16  -2 489.451 53.3735   1
  -5 -16  -2 607.224 58.2667   1
   5 -16   2 505.443 44.9629   1
  16  -2   4 5827.78 173.266   1
   4  16  -2 5659.03 187.476   1
  -4 -16  -2 5579.97 191.067   1
   4 -16   2 5713.16 174.785   1
   3  16  -2 2986.86 119.365   1
  -3 -16  -2 2860.91 122.104   1
   3 -16   2 3073.44 112.038   1
   2 -16   2 1302.45 70.0846   1
  -2 -16  -2 1552.61 84.1978   1
   2  16  -2 1499.32 77.7219   1
   1  16  -2 925.405 58.8820   1
   1 -16   2 890.168 56.5099   1
  -1 -16  -2 937.793 63.9297   1
   0  16  -2 10213.4 279.090   1
   0 -16   2 10343.7 284.318   1
   0 -16  -2 10081.5 289.682   1
   1 -16  -2 871.558 59.4356   1
   1  16   2 813.137 59.0959   1
  -1 -16   2 752.273 55.3680   1
  -1  16  -2 820.403 52.8675   1
  -2  16  -2 1597.48 73.1611   1
   2  16   2 1597.88 82.9975   1
   2 -16  -2 1394.96 79.7087   1
  16   2   2 1614.85 82.1820   1
  -2 -16   2 1634.68 82.2986   1
  16   2   3 2829.16 115.375   1
   3 -16  -2 2808.25 114.862   1
  -3 -16   2 2904.76 117.898   1
   3  16   2 3076.58 121.554   1
   4 -16  -2 5611.35 183.552   1
   4  16   2 5900.25 192.534   1
  16   2   4 5946.26 186.128   1
   5  16   2 577.993 57.5675   1
  16   2   5 511.161 49.0780   1
   5 -16  -2 467.669 46.9060   1
   6 -16  -2 954.490 61.9125   1
  16   2   6 969.027 62.6349   1
  16   2   7 1824.95 88.7891   1
   7 -16  -2 2007.69 88.6175   1
  16   2   8 1743.44 84.7620   1
   8 -16  -2 1522.29 77.3900   1
   9 -16  -2 728.831 53.3984   1
  16   2   9 715.646 54.7977   1
  10 -16  -2 1314.92 69.0818   1
  16   2  10 1235.79 70.6405   1
  11 -16  -2 348.640 39.7373   1
  16   2  11 331.561 41.7489   1
  12  16   2 857.969 75.2937   1
  16   2  12 854.432 59.1937   1
  16   2  13 24.1580 30.4224   1
  13  16   2-49.5563 52.5409   1
  -2  14 -16 1948.59 76.3450   1
  14  16   2 1957.85 114.122   1
   2 -14 -16 1853.99 106.300   1
  15  16   2 106.453 52.9802   1
  -2  15 -16 114.148 27.9652   1
   2 -15 -16 129.771 49.8114   1
  15 -16   3 173.912 28.8485   1
 -16  -3 -15 261.530 40.0427   1
  14 -16   3 3607.59 116.580   1
  13 -16   3-11.1426 20.5197   1
  12 -16   3 1336.90 61.3917   1
  -3 -11 -16 398.911 50.6850   1
  11 -16   3 480.096 36.9464   1
  11  16  -3 427.996 55.8541   1
  16  -3  11 409.552 34.6445   1
  16  -3  10 48.4205 23.2571   1
 -10 -16  -3 48.3294 42.1821   1
  -3 -10 -16 29.9167 36.1336   1
  10 -16   3 57.9996 23.7246   1
  10  16  -3 18.7133 38.0005   1
  -3  -9 -16 110.004 36.0284   1
  -9 -16  -3 146.419 42.7700   1
  16  -3   9 149.543 25.8604   1
   9  16  -3 134.864 41.6797   1
   9 -16   3 108.011 25.3837   1
   8 -16   3 1225.99 58.8131   1
  16  -3   8 1119.30 57.1851   1
   8  16  -3 1113.26 75.6769   1
  -8 -16  -3 1089.65 77.2124   1
  -3  -8 -16 1051.34 70.7343   1
   7 -16   3 1112.44 57.4487   1
  -7 -16  -3 951.671 71.8728   1
  16  -3   7 1109.07 56.6949   1
  -3  -7 -16 1125.28 69.5120   1
   7  16  -3 1003.80 70.2024   1
  16  -3   6 7893.34 216.280   1
   6 -16   3 7864.30 218.049   1
  -6 -16  -3 7609.90 243.415   1
   6  16  -3 7886.32 240.189   1
   5 -16   3 57.3482 25.5349   1
  16  -3   5 43.1094 24.9434   1
  -5 -16  -3 38.0897 33.1351   1
   5  16  -3 72.6931 33.9159   1
   4 -16   3 17585.0 436.526   1
   4  16  -3 17639.8 453.534   1
  -4 -16  -3 16909.3 458.436   1
   3  16  -3 1115.03 69.2691   1
   3 -16   3 1157.50 63.0614   1
  -3 -16  -3 1151.69 74.8928   1
   2  16  -3 3533.10 129.387   1
  -2 -16  -3 3661.61 139.162   1
   2 -16   3 3498.48 124.039   1
  -1 -16  -3 1647.44 88.8803   1
   1 -16   3 1826.10 82.6865   1
   1  16  -3 1811.10 83.5083   1
   0 -16   3 25.5880 28.0533   1
   0  16  -3 2.95028 26.3992   1
   0 -16  -3 3.83120 31.1098   1
   1 -16  -3 1619.57 86.5391   1
  -1 -16   3 1757.19 83.6699   1
  -1  16  -3 1785.06 78.8435   1
  16   3   2 3624.09 134.803   1
  -2  16  -3 3734.19 121.998   1
  -2 -16   3 3534.85 131.000   1
   2 -16  -3 3377.78 132.607   1
   2  16   3 3610.80 135.884   1
  16   3   3 1126.68 71.8319   1
   3  16   3 1140.43 73.7048   1
   3 -16  -3 1240.56 73.6845   1
  16   3   4 17254.0 452.677   1
   4 -16  -3 17365.9 451.825   1
   4  16   3 17935.3 461.434   1
  16   3   5 17.9864 30.7388   1
   5 -16  -3 27.8642 32.5149   1
  16   3   6 7603.42 230.838   1
   6 -16  -3 7759.25 228.281   1
   7 -16  -3 987.713 63.8557   1
  16   3   7 988.115 67.3908   1
  16   3   8 1140.72 70.6727   1
   8 -16  -3 1238.62 69.1212   1
  16   3   9 134.745 35.0684   1
   9 -16  -3 137.437 33.2098   1
  10 -16  -3 91.3383 31.6152   1
  16   3  10 48.4744 32.0673   1
  16   3  11 469.548 49.2919   1
  11  16   3 425.494 59.1768   1
  12  16   3 1187.71 86.8713   1
  16   3  12 1269.50 74.2411   1
  13  16   3-11.2133 41.5606   1
  -3  13 -16-27.5689 24.5360   1
  16   3  13 11.1423 30.8701   1
  -3  14 -16 3791.56 115.610   1
  14  16   3 3604.24 162.623   1
  -3  15 -16 160.531 27.9667   1
   3 -15 -16 235.093 52.1064   1
  15  16   3 184.310 54.8850   1
  15 -16   4 17.6022 21.3798   1
 -16  -4 -15 99.4428 36.8387   1
 -16  -4 -14 3771.86 135.304   1
  14 -16   4 3437.97 110.565   1
  13 -16   4 270.809 30.1243   1
  -4 -12 -16 14.2127 38.0084   1
  12 -16   4 1.99179 21.2497   1
  12  16  -4 25.1739 39.8972   1
 -11 -16  -4-5.00397 36.5579   1
  16  -4  11 8.83454 21.3493   1
  11 -16   4-14.0804 24.1734   1
  -4 -11 -16 45.0514 36.3630   1
  11  16  -4 19.2995 36.5224   1
 -10 -16  -4 14109.4 401.809   1
  -4 -10 -16 14278.4 392.412   1
  10  16  -4 14729.5 398.939   1
  16  -4  10 14267.9 352.990   1
  10 -16   4 14301.1 356.394   1
  -9 -16  -4 1017.48 75.3780   1
  16  -4   9 881.421 48.8653   1
   9  16  -4 1067.72 74.2881   1
  -4  -9 -16 984.172 69.9185   1
   9 -16   4 1008.65 51.3546   1
   8 -16   4 2124.51 80.9763   1
  -8 -16  -4 2142.22 107.918   1
  -4  -8 -16 2023.52 98.2374   1
  16  -4   8 2203.76 80.5370   1
   8  16  -4 2271.38 106.679   1
  16  -4   7 80.5735 21.5972   1
   7  16  -4 20.4935 31.4661   1
   7 -16   4 42.7366 19.9568   1
  -7 -16  -4 40.7239 33.5576   1
  -4  -7 -16 33.4461 27.9579   1
  -6 -16  -4 6224.73 203.934   1
   6 -16   4 5760.84 170.338   1
  16  -4   6 6126.80 170.521   1
   6  16  -4 6000.60 195.728   1
  -4  -6 -16 5526.23 185.400   1
  16  -4   5 77.7334 24.0613   1
   5  16  -4 86.8672 31.6313   1
   5 -16   4 86.0191 25.5653   1
  -4  -5 -16 121.428 33.0685   1
  -5 -16  -4 94.9760 36.7410   1
   4  16  -4 860.945 61.6456   1
  -4 -16  -4 769.121 62.4961   1
   4 -16   4 896.379 51.9794   1
  -3 -16  -4 24.9467 32.3241   1
   3  16  -4 24.0166 27.0178   1
   3 -16   4-10.8097 26.8758   1
   2 -16   4 2746.29 104.168   1
  -2 -16  -4 2734.68 118.668   1
   2  16  -4 2758.03 109.657   1
  -1 -16  -4 60.3099 33.2327   1
   1 -16   4 2.95854 26.8679   1
   1  16  -4 43.4849 26.6893   1
   0 -16  -4 17503.9 453.822   1
   0  16  -4 17094.4 435.825   1
   1 -16  -4 15.5212 31.5165   1
  -1  16  -4 29.6465 23.1623   1
  16   4   1 57.1867 30.9657   1
  16   4   2 2664.27 113.857   1
   2 -16  -4 2775.13 115.606   1
   2  16   4 2685.59 114.797   1
  -2  16  -4 2760.44 99.4642   1
  16   4   3 3.77104 32.2197   1
   3  16   4 19.7701 32.6751   1
  -3  16  -4 16.5509 21.7703   1
   3 -16  -4-11.1818 32.5234   1
   4 -16  -4 854.224 60.7808   1
  16   4   4 823.867 60.5388   1
  16   4   5 68.2227 33.4377   1
   5 -16  -4 53.6415 30.4186   1
   6 -16  -4 6111.80 191.544   1
  16   4   6 5896.63 194.302   1
  16   4   7 66.0037 31.3492   1
   7 -16  -4 17.5637 27.1440   1
  16   4   8 1960.11 97.4227   1
   8 -16  -4 2230.02 96.2932   1
   9 -16  -4 1066.67 67.1582   1
  16   4   9 983.344 70.9111   1
  10  16   4 14623.1 411.151   1
  16   4  10 14468.3 391.535   1
  16   4  11-31.4771 35.7216   1
  11  16   4 21.2180 38.4690   1
  12  16   4-5.50353 40.5033   1
  16   4  12-19.7152 33.6901   1
  13  16   4 295.112 54.6959   1
  -4  13 -16 275.187 26.5214   1
  16   4  13 205.723 40.9877   1
  14  16   4 3677.23 162.004   1
  -4  14 -16 3531.04 106.774   1
  15  16   4 78.4421 51.8372   1
  -4  15 -16 32.5141 20.5897   1
  15 -16   5 1501.51 59.3307   1
 -16  -5 -15 1690.79 87.5884   1
 -16  -5 -14 33.3804 35.8677   1
  14 -16   5 63.4495 19.5643   1
 -16  -5 -13 2848.15 117.751   1
  13  16  -5 2671.82 132.198   1
  13 -16   5 3003.03 91.9294   1
  -5 -13 -16 2832.58 132.031   1
  12  16  -5 876.580 74.1838   1
  12 -16   5 920.356 44.1454   1
 -12 -16  -5 718.981 68.4684   1
  -5 -12 -16 928.146 75.0248   1
  11 -16   5 60.8388 19.3262   1
  -5 -11 -16 110.528 40.2017   1
  11  16  -5 33.6761 37.6612   1
 -11 -16  -5 5.06477 34.4865   1
  16  -5  10 345.966 29.0301   1
 -10 -16  -5 287.102 51.4020   1
  -5 -10 -16 415.268 53.4286   1
  10  16  -5 336.882 51.0473   1
  10 -16   5 394.995 30.2335   1
  -5  -9 -16 306.811 47.6145   1
   9 -16   5 347.669 29.9822   1
  -9 -16  -5 366.004 52.7724   1
  16  -5   9 307.766 29.3797   1
   9  16  -5 345.434 51.9824   1
   8 -16   5 35.0492 19.2924   1
  16  -5   8 11.2514 18.8748   1
  -5  -8 -16 7.88322 30.6462   1
  -8 -16  -5 23.5049 35.0965   1
   8  16  -5 16.9439 30.0263   1
  -5  -7 -16 315.808 42.1349   1
   7 -16   5 287.555 29.0588   1
  -7 -16  -5 266.510 47.2462   1
  16  -5   7 279.872 28.7785   1
   7  16  -5 398.000 46.9743   1
   6  16  -5 27.1968 30.9813   1
   6 -16   5 19.6091 18.6182   1
  -6 -16  -5 17.9928 31.3814   1
  16  -5   6 4.18722 19.1896   1
  -5  -6 -16 21.3608 26.2022   1
   5 -16   5 157.226 27.1736   1
  -5  -5 -16 104.320 30.8295   1
  -5 -16  -5 119.020 36.9556   1
   5  16  -5 123.328 32.9031   1
   4  16  -5 28.4451 28.3582   1
  -5  -4 -16 31.7729 26.7122   1
  -4 -16  -5 65.1218 32.6433   1
   4 -16   5 12.1478 21.3177   1
   3  16  -5 613.054 50.0362   1
  -5  -3 -16 495.927 45.4869   1
  -3 -16  -5 541.767 54.8753   1
   3 -16   5 581.265 42.8584   1
  -5  -2 -16 1125.67 62.1621   1
   2  16  -5 1107.14 64.2102   1
  -2 -16  -5 1070.98 73.1527   1
  -1 -16  -5 592.162 55.2301   1
   1  16  -5 740.803 52.8984   1
   0  16  -5 11107.4 298.625   1
  16   5   0 10968.1 315.661   1
   0 -16  -5 11455.6 319.185   1
   1 -16  -5 600.006 56.1815   1
  16   5   1 553.975 53.5998   1
  -1  16  -5 689.879 47.4066   1
  16   5   2 1160.08 72.6444   1
  -2  16  -5 1184.46 59.4898   1
   2 -16  -5 1157.74 73.0750   1
  -3  16  -5 715.710 43.3141   1
  16   5   3 688.349 56.5393   1
   4 -16  -5 44.9879 28.1954   1
  16   5   4 27.7423 31.0210   1
  16   5   5 163.469 36.4002   1
   5 -16  -5 182.042 36.2614   1
  16   5   6 40.5949 32.3689   1
   6 -16  -5-14.7176 24.3941   1
  16   5   7 263.749 42.3267   1
   7 -16  -5 336.473 40.5106   1
   8 -16  -5 29.4932 27.7157   1
  16   5   8-8.27589 35.3548   1
  16   5   9 268.814 45.5848   1
   9  16   5 324.510 53.6578   1
  10  16   5 357.983 54.7745   1
  16   5  10 356.937 50.6828   1
  16   5  11 20.8432 40.1236   1
  11  16   5 37.4253 40.1973   1
  12  16   5 1048.42 81.2262   1
  16   5  12 863.361 68.7492   1
  16   5  13 2838.32 123.360   1
  13  16   5 2846.57 139.236   1
  16   5  14 102.658 38.6770   1
  14  16   5 23.6747 44.5206   1
  15  16   5 1647.84 108.521   1
  -6 -15 -16 636.216 71.6235   1
  15 -16   6 649.066 30.2197   1
 -16  -6 -15 614.917 59.0666   1
  -6 -14 -16 1505.27 98.4273   1
 -16  -6 -14 1456.38 84.0270   1
  14 -16   6 1562.02 51.5842   1
  14  16  -6 1499.57 97.2033   1
  13  16  -6 1010.47 80.1724   1
 -16  -6 -13 1226.11 74.9031   1
  13 -16   6 1136.59 42.7416   1
  -6 -13 -16 1109.04 82.8740   1
  12 -16   6 158.323 19.1435   1
  12  16  -6 150.646 46.3534   1
  -6 -12 -16 132.010 41.4551   1
 -16  -6 -12 126.146 37.5544   1
  11 -16   6 1594.81 56.1548   1
  -6 -11 -16 1618.96 92.7175   1
  11  16  -6 1500.41 93.0968   1
 -11 -16  -6 1601.06 95.3067   1
  16  -6  10 4303.43 117.682   1
  10  16  -6 4095.65 163.671   1
  -6 -10 -16 4452.58 164.582   1
 -10 -16  -6 4433.96 169.641   1
  10 -16   6 4507.49 122.611   1
   9  16  -6 612.836 59.0509   1
  -9 -16  -6 487.052 57.9665   1
   9 -16   6 609.561 35.0494   1
  16  -6   9 601.787 33.6211   1
  -6  -9 -16 620.537 57.4070   1
  -6  -8 -16 1259.26 76.5951   1
   8 -16   6 1285.59 52.7091   1
   8  16  -6 1248.10 77.5386   1
  -8 -16  -6 1328.75 83.8047   1
  16  -6   8 1163.37 51.2032   1
  16  -6   7 6838.63 186.208   1
   7  16  -6 7316.82 223.293   1
  -7 -16  -6 6845.32 228.204   1
  -6  -7 -16 7136.10 218.514   1
  -6  -6 -16 750.858 56.3383   1
   6  16  -6 801.608 61.2300   1
  -6 -16  -6 705.495 63.5809   1
  16  -6   6 767.178 42.4778   1
  -6  -5 -16 890.462 59.7856   1
   5  16  -6 896.917 62.1662   1
  -5 -16  -6 770.084 65.3052   1
  -6  -4 -16 884.831 58.5930   1
   4  16  -6 948.042 62.7889   1
  -4 -16  -6 894.193 67.5125   1
  -3 -16  -6 5828.50 198.965   1
  -6  -3 -16 5765.10 177.919   1
   3  16  -6 5831.55 183.865   1
   2  16  -6 707.194 53.2676   1
  -6  -2 -16 748.276 50.2046   1
  -2 -16  -6 690.995 58.6310   1
   1  16  -6 1137.83 64.5099   1
  -1 -16  -6 1258.83 78.4899   1
  -6  -1 -16 1364.33 64.5613   1
  16   6   0 4346.73 159.890   1
   0  16  -6 4290.31 142.890   1
   0 -16  -6 4477.39 163.120   1
  -6   0 -16 4557.31 139.501   1
  16   6   1 1281.91 77.4523   1
  -6   1 -16 1263.69 59.9040   1
   1 -16  -6 1315.84 78.8676   1
  -1  16  -6 1286.94 63.7779   1
  16   6   2 709.823 60.7277   1
  -2  16  -6 751.275 46.2848   1
   2 -16  -6 715.704 59.6980   1
   3 -16  -6 5943.13 196.000   1
  16   6   3 5962.55 198.546   1
  -3  16  -6 6109.18 171.662   1
  -4  16  -6 992.606 49.1906   1
  16   6   4 1019.58 70.0507   1
   4 -16  -6 915.396 64.7724   1
   5 -16  -6 839.887 63.0919   1
  16   6   5 827.040 65.4846   1
   6 -16  -6 706.039 58.1217   1
  16   6   6 733.133 60.0690   1
  16   6   7 6972.37 225.804   1
   7 -16  -6 7253.41 220.404   1
   8  16   6 1286.20 85.0922   1
  16   6   8 1207.27 79.4393   1
   9  16   6 581.100 61.2756   1
  16   6   9 587.346 58.6992   1
  10  16   6 4286.67 170.867   1
  16   6  10 4497.36 166.052   1
  11  16   6 1713.05 103.537   1
  16   6  11 1592.82 92.0433   1
  -6  12 -16 185.358 16.8971   1
  12  16   6 224.019 50.2793   1
  16   6  12 146.048 43.3255   1
  13  16   6 1188.04 90.9072   1
  16   6  13 1210.03 79.4791   1
  -6  13 -16 1203.55 40.8792   1
  16   6  14 1291.03 83.9188   1
  -6  14 -16 1436.97 45.6175   1
  14  16   6 1425.42 98.8610   1
  15  16   6 571.338 70.4474   1
  -6  15 -16 629.537 27.0004   1
  15  16  -7 22.5060 44.0248   1
 -16  -7 -15-8.48671 36.4490   1
  -7 -15 -16-16.7060 43.8507   1
 -16  -7 -14 1070.55 73.1616   1
  -7 -14 -16 981.656 81.6650   1
  14  16  -7 1094.19 82.8174   1
 -16  -7 -13 1231.31 78.7267   1
  -7 -13 -16 1304.57 90.3655   1
  13  16  -7 1510.38 93.3064   1
 -16  -7 -12 97.0981 36.6325   1
  12  16  -7 124.808 40.8488   1
  -7 -12 -16 104.343 40.4170   1
  -7 -11 -16 28.4593 34.9136   1
  11  16  -7 33.5775 35.3077   1
 -10 -16  -7-35.2889 35.7335   1
  10  16  -7-23.0106 36.6981   1
  -7 -10 -16-4.52871 37.2105   1
  -9 -16  -7 233.656 44.0939   1
   9  16  -7 207.832 41.7461   1
  -7  -9 -16 246.040 42.6917   1
  16  -7   9 213.227 18.4518   1
  16  -7   8 1128.50 45.7034   1
  -8 -16  -7 1071.64 77.7878   1
  -7  -8 -16 1177.95 74.2621   1
   8  16  -7 1188.79 75.4096   1
   7  16  -7 2747.74 118.050   1
  -7 -16  -7 2950.22 129.361   1
  16  -7   7 2711.24 86.4945   1
  -7  -7 -16 2762.66 116.354   1
   6  16  -7 5100.87 172.468   1
  -6 -16  -7 5082.81 184.391   1
  16  -7   6 5060.73 143.043   1
  -7  -6 -16 5082.81 170.670   1
   5  16  -7 1168.84 70.2384   1
  -7  -5 -16 1185.06 69.1431   1
  -5 -16  -7 1108.56 77.8040   1
  -4 -16  -7 6895.92 221.447   1
   4  16  -7 6477.71 203.929   1
  -7  -4 -16 6658.87 201.785   1
  -3 -16  -7 1293.14 80.9964   1
  -7  -3 -16 1374.69 69.8139   1
   3  16  -7 1261.59 70.4639   1
  -2 -16  -7 398.164 47.4910   1
  -7  -2 -16 356.855 37.9013   1
   2  16  -7 409.698 40.5927   1
   1  16  -7 1085.81 60.9716   1
  -7  -1 -16 960.643 55.4843   1
  -1 -16  -7 1115.05 73.4461   1
  16   7  -1 1092.56 72.6826   1
   0  16  -7 2123.22 87.1660   1
  16   7   0 2316.52 106.508   1
  -7   0 -16 2090.82 83.2621   1
   0 -16  -7 1939.21 100.162   1
   1 -16  -7 1123.09 73.6578   1
  16   7   1 1075.99 73.3409   1
  -7   1 -16 1038.52 52.3814   1
  -1  16  -7 992.423 55.8497   1
  16   7   2 431.064 50.8686   1
   2 -16  -7 410.673 50.2470   1
  -2  16  -7 479.127 38.3581   1
  -7   2 -16 410.959 33.4972   1
   3 -16  -7 1297.88 77.7687   1
  -3  16  -7 1294.72 58.5206   1
  16   7   3 1205.25 78.6108   1
  -7   3 -16 1300.23 56.0621   1
  -7   4 -16 6784.04 179.502   1
  16   7   4 6407.78 214.853   1
  -4  16  -7 6843.98 182.523   1
   4 -16  -7 6357.93 210.652   1
   5 -16  -7 1204.25 74.3300   1
  -7   5 -16 1185.85 49.6839   1
  16   7   5 1047.20 75.1689   1
   6 -16  -7 5082.35 173.131   1
  -7   6 -16 4964.03 135.461   1
  16   7   6 5014.20 179.860   1
   7 -16  -7 2747.94 118.034   1
  16   7   7 2736.86 122.817   1
  -7   7 -16 2871.44 83.7498   1
   7  16   7 2659.62 125.026   1
   8  16   7 942.178 75.0888   1
  16   7   8 1041.19 75.0162   1
  -7   8 -16 1088.65 40.7438   1
  -7   9 -16 239.139 17.8309   1
  16   7   9 198.939 41.9083   1
   9  16   7 188.567 43.1352   1
  -7  10 -16 20.5268 10.0372   1
  10  16   7-20.9460 39.3666   1
  16   7  10-46.5441 39.9805   1
  16   7  11-4.62489 35.9636   1
  -7  11 -16 32.1216 7.28140   1
  11  16   7 64.8808 40.9345   1
  -7  11 -16 40.4385 7.68240   1
  16   7  12 190.932 41.3927   1
  12  16   7 100.852 45.0739   1
  16   7  13 1306.73 84.0492   1
  13  16   7 1354.66 95.6751   1
  16   7  14 1036.23 79.6552   1
  14  16   7 1023.32 89.4880   1
  15  16   7-6.19185 49.6754   1
 -15 -16  -8 672.611 73.2988   1
  -8 -15 -16 710.100 72.3746   1
 -16  -8 -15 659.500 63.2765   1
  15  16  -8 698.548 72.2462   1
  -8 -14 -16 360.839 60.3057   1
 -16  -8 -14 316.715 49.4661   1
  14  16  -8 404.404 60.6006   1
  -8 -13 -16 176.385 51.5395   1
  13  16  -8 147.050 48.0679   1
 -16  -8 -13 203.379 42.8743   1
 -16  -8 -12 1973.75 101.297   1
  12  16  -8 2195.44 112.837   1
  -8 -12 -16 1941.45 107.820   1
 -16  -8 -11 349.306 49.6753   1
  -8 -11 -16 454.759 56.3037   1
  11  16  -8 385.512 54.8730   1
  10  16  -8 87.4350 36.7525   1
  -8 -10 -16 100.730 40.0060   1
   9  16  -8 254.945 43.7558   1
  -9 -16  -8 301.132 47.6256   1
  16  -8   9 252.649 14.8054   1
  -8  -9 -16 337.915 47.3400   1
  16  -8   8 3772.80 102.669   1
   8  16  -8 3643.26 143.862   1
  -8  -8 -16 3963.93 147.941   1
  -8 -16  -8 3852.22 155.349   1
  -8  -7 -16 2347.92 106.414   1
  -7 -16  -8 2363.36 117.543   1
  16  -8   7 2320.51 74.0020   1
   7  16  -8 2313.58 106.267   1
   6  16  -8 306.274 43.3439   1
  -6 -16  -8 337.162 49.1607   1
  16  -8   6 311.346 27.2890   1
  -8  -6 -16 318.966 42.7668   1
  -8  -5 -16 3016.46 120.513   1
   5  16  -8 3175.60 124.333   1
  -5 -16  -8 3146.85 136.006   1
  -4 -16  -8 655.523 61.6320   1
  -8  -4 -16 684.729 51.4522   1
   4  16  -8 648.312 52.1602   1
  -3 -16  -8 110.190 36.9157   1
  -8  -3 -16 112.709 30.4838   1
   3  16  -8 107.484 28.9606   1
  -8  -2 -16 38.1361 23.4171   1
   2  16  -8 36.9676 24.5887   1
  16   8  -2 72.2518 35.8009   1
  -2 -16  -8 81.8019 36.2534   1
  -1 -16  -8 591.664 58.3312   1
  16   8  -1 591.459 57.3548   1
   1  16  -8 640.992 46.6668   1
  -8  -1 -16 605.274 45.4985   1
   0 -16  -8 2714.91 119.181   1
   0  16  -8 2678.79 100.321   1
  16   8   0 2504.75 117.212   1
  -8   0 -16 2640.96 96.5771   1
   1 -16  -8 614.515 55.8272   1
  -1  16  -8 534.156 41.1785   1
  16   8   1 562.976 56.5857   1
  -8   1 -16 588.025 40.2567   1
  -8   2 -16 59.5835 19.9026   1
   2 -16  -8 67.6286 34.3442   1
  -2  16  -8 37.2638 22.0667   1
  16   8   2 85.4566 36.7593   1
  -3  16  -8 102.281 23.9127   1
  -8   3 -16 140.434 23.3435   1
   3 -16  -8 108.903 34.5226   1
  16   8   3 149.125 40.1296   1
   4 -16  -8 586.250 55.0525   1
  16   8   4 588.161 57.2842   1
  -4  16  -8 568.237 36.3318   1
  -8   4 -16 653.526 36.7494   1
   5 -16  -8 2828.65 123.815   1
  -8   5 -16 3132.60 94.6281   1
  16   8   5 3213.16 133.864   1
   6  16   8 373.560 53.4025   1
  16   8   6 257.986 47.3002   1
  -8   6 -16 356.385 25.7421   1
   6 -16  -8 413.584 49.5092   1
  -8   7 -16 2340.19 71.0808   1
   7  16   8 2416.70 117.095   1
  16   8   7 2444.27 116.511   1
   8  16   8 3831.29 157.298   1
  -8   8 -16 3905.13 101.605   1
  16   8   8 3894.33 154.838   1
   9  16   8 293.826 49.1811   1
  16   8   9 295.175 50.7679   1
  -8   9 -16 286.387 14.7041   1
  10  16   8 69.1278 39.7523   1
  16   8  10 121.899 41.2629   1
  16   8  11 483.041 60.8308   1
  11  16   8 460.434 62.3222   1
  12  16   8 2040.80 116.307   1
  16   8  12 1934.74 105.513   1
  16   8  13 259.523 52.4137   1
  13  16   8 290.401 58.9846   1
  14  16   8 342.756 62.7716   1
  16   8  14 309.359 52.7994   1
  15  16   8 672.237 76.4891   1
 -15 -16  -9 2362.19 127.543   1
  15  16  -9 2738.42 134.779   1
  -9 -15 -16 2598.25 132.325   1
 -16  -9 -15 2604.43 121.871   1
 -14 -16  -9 359.940 63.2030   1
  14  16  -9 219.920 55.3209   1
 -16  -9 -14 299.996 50.2161   1
  -9 -14 -16 377.681 60.5699   1
 -16  -9 -13 9790.15 297.203   1
  -9 -13 -16 9782.03 306.475   1
  13  16  -9 10259.5 310.144   1
 -16  -9 -12 1542.86 90.3007   1
  12  16  -9 1453.48 94.5834   1
  -9 -12 -16 1408.82 92.7971   1
  11  16  -9 4091.53 161.494   1
  -9 -11 -16 4104.90 161.088   1
 -16  -9 -11 4004.50 155.354   1
  -9 -10 -16 635.419 60.1628   1
  10  16  -9 553.721 58.0502   1
  -9  -9 -16 17.6180 35.9823   1
   9  16  -9 44.3731 34.5027   1
  -9  -8 -16 577.269 55.4414   1
  -8 -16  -9 548.317 59.2442   1
  16  -9   8 503.503 22.0246   1
   8  16  -9 549.452 54.8422   1
  -9  -7 -16 340.105 44.6481   1
  16  -9   7 344.606 23.3666   1
   7  16  -9 284.470 42.9821   1
  -7 -16  -9 418.134 52.1798   1
  -6 -16  -9 358.446 51.6481   1
   6  16  -9 455.086 47.9776   1
  -9  -6 -16 353.246 43.9550   1
   5  16  -9 1134.79 70.2956   1
  -9  -5 -16 1295.06 74.0209   1
  -5 -16  -9 1354.15 86.2499   1
  -4 -16  -9-9.53869 35.0999   1
   4  16  -9-24.0515 32.3600   1
  -9  -4 -16 3.38785 27.6734   1
   3  16  -9 5526.63 175.290   1
  -3 -16  -9 5600.96 194.827   1
  16   9  -3 5562.76 194.086   1
  -9  -3 -16 5479.89 175.466   1
  -9  -2 -16 312.628 37.4837   1
  -2 -16  -9 369.540 49.9395   1
  16   9  -2 295.277 48.2820   1
   2  16  -9 357.538 39.0952   1
   1  16  -9 1675.94 76.7014   1
  -9  -1 -16 1665.70 74.8846   1
  16   9  -1 1585.48 91.9121   1
  -1 -16  -9 1659.33 93.2926   1
  16   9   0 1946.07 99.2796   1
  -9   0 -16 1723.60 75.2329   1
   0 -16  -9 1752.18 95.4915   1
   0  16  -9 1625.15 74.8652   1
  16   9   1 1680.29 93.7566   1
  -9   1 -16 1642.85 70.8187   1
  -1  16  -9 1666.47 72.5482   1
   1 -16  -9 1635.37 90.7136   1
  16   9   2 462.898 54.1514   1
  -2  16  -9 384.001 34.2130   1
  -9   2 -16 320.872 31.6868   1
   2 -16  -9 361.585 48.8926   1
  16   9   3 5227.53 190.726   1
  -9   3 -16 5475.83 154.512   1
  -3  16  -9 5630.72 157.524   1
   3 -16  -9 5316.75 187.071   1
   4 -16  -9-4.29513 35.6968   1
  16   9   4 4.75565 33.9687   1
  -4  16  -9 14.2473 18.3325   1
  -9   4 -16-6.76951 18.0548   1
   5 -16  -9 1206.24 78.3954   1
  -5  16  -9 1405.22 53.5142   1
  16   9   5 1276.04 84.6185   1
  -9   5 -16 1268.63 51.1374   1
   6 -16  -9 422.701 51.2605   1
  -9   6 -16 380.762 25.3594   1
  16   9   6 338.606 51.9572   1
  -9   7 -16 387.217 21.5137   1
  16   9   7 351.839 51.1571   1
   8  16   9 488.022 58.6264   1
  -9   8 -16 500.542 18.8907   1
  16   9   8 458.344 58.5520   1
   9  16   9-10.5127 41.1296   1
  16   9   9 40.4760 37.2356   1
  10  16   9 801.512 73.9453   1
  16   9  10 523.565 59.7092   1
  11  16   9 4163.36 173.718   1
  16   9  11 4248.48 166.700   1
  16   9  12 1401.76 94.5476   1
  12  16   9 1669.68 104.898   1
  13  16   9 10675.5 329.962   1
  16   9  13 10323.0 317.293   1
  16   9  14 266.243 57.2249   1
  14  16   9 337.841 61.5379   1
  15  16   9 2483.18 134.084   1
 -15 -16 -10 1903.11 113.719   1
  15  16 -10 1873.02 112.200   1
 -10 -15 -16 1733.44 108.802   1
 -16 -10 -15 1852.25 104.604   1
  14  16 -10 801.580 77.8621   1
 -16 -10 -14 894.529 74.7714   1
 -10 -14 -16 773.662 76.2343   1
 -14 -16 -10 670.729 73.6772   1
 -16 -10 -13 425.163 57.9369   1
 -13 -16 -10 428.840 64.7552   1
  13  16 -10 324.008 62.1732   1
 -10 -13 -16 412.142 62.9089   1
 -16 -10 -12 3863.80 155.299   1
  12  16 -10 4031.00 162.721   1
 -10 -12 -16 3904.21 161.205   1
  11  16 -10 44.0424 41.8449   1
 -16 -10 -11 78.9020 42.3697   1
 -10 -11 -16 102.269 38.8686   1
 -10 -10 -16 566.575 59.9654   1
  10  16 -10 674.356 65.4619   1
 -10  -9 -16 75.8743 38.1752   1
   9  16 -10 85.0161 37.0196   1
 -10  -8 -16 1627.54 90.8355   1
   8  16 -10 1606.56 89.6763   1
  16 -10   7 889.048 33.8235   1
 -10  -7 -16 864.329 65.2986   1
  -7 -16 -10 866.035 72.3208   1
   7  16 -10 836.140 64.6840   1
  -6 -16 -10 271.059 47.1395   1
   6  16 -10 229.952 41.6315   1
 -10  -6 -16 209.607 38.1037   1
  -5 -16 -10 2393.14 117.397   1
   5  16 -10 2366.54 103.334   1
 -10  -5 -16 2180.56 100.024   1
  16  10  -4 5834.79 205.843   1
  -4 -16 -10 5948.93 207.334   1
   4  16 -10 5935.39 189.192   1
 -10  -4 -16 6069.92 188.499   1
 -10  -3 -16 35.0563 28.2439   1
   3  16 -10 58.4268 28.7664   1
  -3 -16 -10-4.84656 36.4414   1
  16  10  -3 24.3136 35.7934   1
 -10  -2 -16 369.011 41.8967   1
  -2 -16 -10 440.517 55.4839   1
  16  10  -2 359.740 51.3129   1
   2  16 -10 382.100 40.1665   1
 -10  -1 -16-5.52251 24.5860   1
  16  10  -1-4.82704 34.7431   1
   1  16 -10-2.85295 24.2442   1
  -1 -16 -10-14.0989 37.2412   1
   0 -16 -10 3944.95 153.758   1
   0  16 -10 3821.03 127.902   1
  16  10   0 3761.42 153.552   1
 -10   0 -16 3871.42 126.929   1
   1 -16 -10-13.6016 34.0848   1
 -10   1 -16-18.5857 23.7386   1
  16  10   1-4.84162 33.5029   1
  -1  16 -10-4.94514 21.3529   1
 -10   2 -16 382.610 32.5061   1
  -2  16 -10 399.450 34.2679   1
  16  10   2 374.525 50.2608   1
   2 -16 -10 391.154 50.1835   1
 -10   3 -16 48.7751 19.9184   1
   3 -16 -10 62.5381 35.8614   1
  16  10   3 44.2311 38.7223   1
  -3  16 -10 75.1116 22.1398   1
  -4  16 -10 6205.20 167.910   1
   4 -16 -10 5990.07 205.121   1
  16  10   4 6101.08 214.087   1
 -10   4 -16 6209.80 166.037   1
  16  10   5 2323.85 119.738   1
  -5  16 -10 2405.49 77.5888   1
 -10   5 -16 2471.19 76.6431   1
   5 -16 -10 2369.49 112.543   1
 -10   6 -16 255.908 19.7036   1
  16  10   6 183.116 47.5811   1
 -10   7 -16 814.002 28.4997   1
  16  10   7 910.154 74.8638   1
  16  10   8 1512.12 96.2251   1
   9  16  10 53.7674 42.8959   1
  16  10   9 73.4019 40.5200   1
  10  16  10 712.789 72.0152   1
  16  10  10 717.608 68.4883   1
  11  16  10 101.219 48.6312   1
  16  10  11 136.762 47.8268   1
  12  16  10 3755.68 166.102   1
  16  10  12 3975.94 163.523   1
  16  10  13 422.316 64.5608   1
  13  16  10 516.427 68.7519   1
  16  10  14 637.378 72.0647   1
  14  16  10 982.509 85.7103   1
  15  16  10 2092.80 122.524   1
 -15 -16 -11 473.699 67.3314   1
  15  16 -11 529.697 69.1991   1
 -11 -15 -16 536.636 69.9226   1
 -16 -11 -15 515.695 66.0818   1
 -16 -11 -14 1013.73 81.6359   1
 -11 -14 -16 1071.96 85.8671   1
 -14 -16 -11 980.444 84.4195   1
  14  16 -11 930.427 82.7710   1
 -11 -13 -16 3926.41 163.299   1
 -16 -11 -13 3835.03 160.650   1
  13  16 -11 3910.83 164.352   1
 -13 -16 -11 3938.97 167.071   1
 -16 -11 -12 49.1599 44.8475   1
 -12 -16 -11 94.4341 49.9529   1
  12  16 -11 20.4715 49.0508   1
 -11 -12 -16-5.12650 40.3760   1
 -16 -11 -11 2610.02 122.863   1
  11  16 -11 2634.86 126.369   1
 -11 -11 -16 2540.37 123.327   1
  10  16 -11 89.3057 41.0329   1
 -16 -11 -10 67.1866 36.3492   1
 -11 -10 -16 23.4927 40.3790   1
   9  16 -11 1425.81 86.6352   1
 -11  -9 -16 1382.15 84.9869   1
 -11  -8 -16 380.672 49.8231   1
   8  16 -11 447.133 53.1641   1
 -11  -7 -16 415.383 50.5105   1
   7  16 -11 441.553 50.0507   1
  16 -11   7 465.041 20.4867   1
  -6 -16 -11 5632.04 204.253   1
 -11  -6 -16 5773.61 189.058   1
   6  16 -11 5722.19 189.096   1
  -5 -16 -11 673.045 67.5930   1
   5  16 -11 667.895 58.0218   1
  16  11  -5 703.158 69.3308   1
 -11  -5 -16 667.576 56.4191   1
  16  11  -4 9018.63 284.547   1
  -4 -16 -11 8776.78 282.607   1
   4  16 -11 9145.04 263.000   1
 -11  -4 -16 9561.82 264.741   1
  -3 -16 -11 697.272 64.9933   1
  16  11  -3 689.869 65.3750   1
   3  16 -11 582.827 49.5703   1
 -11  -3 -16 588.981 49.2921   1
 -11  -2 -16 1517.78 76.2522   1
   2  16 -11 1584.49 76.4284   1
  16  11  -2 1624.58 96.7761   1
  -2 -16 -11 1485.13 91.6462   1
 -11  -1 -16 83.2337 25.2120   1
  16  11  -1 29.9434 39.5620   1
   1  16 -11 48.5777 25.2139   1
  -1 -16 -11 9.67428 34.3019   1
  16  11   0 50.1250 36.0815   1
   0 -16 -11 9.50049 33.4081   1
   0  16 -11 31.8169 22.4145   1
 -11   0 -16 12.7427 22.2439   1
  -1  16 -11 27.0537 22.1324   1
   1 -16 -11 37.2953 30.6441   1
  16  11   1 30.2211 37.3463   1
 -11   1 -16 60.3134 22.2487   1
  -2  16 -11 1615.43 68.8481   1
  16  11   2 1573.13 94.6264   1
 -11   2 -16 1600.30 66.4850   1
   2 -16 -11 1715.22 94.2514   1
 -11   3 -16 624.049 38.3128   1
  16  11   3 699.900 68.2641   1
   3 -16 -11 625.889 59.6000   1
  -3  16 -11 601.166 40.2333   1
 -11   4 -16 9038.73 232.000   1
   4 -16 -11 8985.84 278.756   1
  -4  16 -11 9241.32 235.493   1
  16  11   4 9687.59 292.572   1
 -11   5 -16 626.000 32.5317   1
   5 -16 -11 688.746 64.0194   1
  16  11   5 776.016 71.9231   1
  -5  16 -11 632.886 34.3429   1
  16  11   6 5388.90 199.949   1
 -11   6 -16 5407.88 136.012   1
  16  11   7 457.417 62.6320   1
  16  11   8 402.750 59.3439   1
  16  11   9 1410.62 94.1978   1
  16  11  10 71.1798 43.9558   1
  16  11  11 2619.49 128.133   1
  11  16  11 2583.37 132.980   1
  12  16  11 5.86440 44.9981   1
  16  11  12 38.6969 46.4664   1
  13  16  11 4439.86 179.489   1
  16  11  13 3948.63 171.359   1
  14  16  11 1110.16 89.8655   1
  16  11  14 901.695 81.4019   1
  15  16  11 569.889 71.8710   1
  15  16 -12 1772.46 108.598   1
 -15 -16 -12 1827.17 112.630   1
 -16 -12 -15 1840.21 109.366   1
 -12 -15 -16 1769.50 110.969   1
 -12 -14 -16 2269.85 121.299   1
 -16 -12 -14 2196.93 118.427   1
  14  16 -12 2101.35 118.135   1
 -14 -16 -12 2150.65 122.066   1
 -16 -12 -13-15.6087 43.9782   1
  13  16 -12-80.5724 54.8873   1
 -12 -13 -16-21.3837 46.6524   1
 -13 -16 -12 5.68974 48.0924   1
 -12 -16 -12 101.124 49.8290   1
 -16 -12 -12 112.906 45.3022   1
  12  16 -12 113.363 51.2988   1
 -12 -12 -16 97.6073 45.8017   1
  11  16 -12 672.291 68.0961   1
 -11 -16 -12 576.277 68.1595   1
 -12 -11 -16 566.761 64.5886   1
 -16 -12 -11 643.803 67.4097   1
 -16 -12 -10 857.702 74.0260   1
 -12 -10 -16 726.675 68.4872   1
  10  16 -12 709.467 67.2169   1
   9  16 -12 257.100 47.3430   1
 -12  -9 -16 166.676 44.1473   1
   8  16 -12 258.820 46.8845   1
 -12  -8 -16 171.722 41.5806   1
   7  16 -12 785.413 62.4596   1
 -12  -7 -16 885.949 66.7261   1
  16  12  -6 1445.11 97.2717   1
   6  16 -12 1610.70 87.4687   1
 -12  -6 -16 1540.08 86.0595   1
  16  12  -5 318.496 57.8370   1
   5  16 -12 315.331 44.7780   1
  -5 -16 -12 249.414 56.6350   1
 -12  -5 -16 365.500 48.3293   1
  -4 -16 -12 3693.47 154.712   1
  16  12  -4 3678.45 155.413   1
   4  16 -12 3575.91 134.725   1
 -12  -4 -16 3555.39 132.444   1
  16  12  -3-15.5491 43.5630   1
   3  16 -12-9.80769 31.3295   1
  -3 -16 -12 15.2794 38.8164   1
 -12  -3 -16-3.21964 30.9858   1
  -2 -16 -12-25.0133 37.0837   1
   2  16 -12-6.13745 26.7791   1
  16  12  -2-41.2191 41.5888   1
 -12  -2 -16-8.99594 25.3456   1
   1  16 -12 617.685 47.2398   1
  -1 -16 -12 499.311 59.2916   1
 -12  -1 -16 656.251 46.5793   1
  16  12  -1 560.899 63.1539   1
 -12   0 -16 648.940 44.5991   1
  16  12   0 689.564 67.2158   1
   0  16 -12 660.340 46.0237   1
   0 -16 -12 631.656 61.8646   1
  16  12   1 458.642 58.8188   1
   1 -16 -12 605.251 60.1182   1
 -12   1 -16 541.104 39.7820   1
  -1  16 -12 606.853 43.1425   1
   2 -16 -12-14.3349 36.1700   1
  -2  16 -12 2.22187 23.1245   1
 -12   2 -16 2.03892 19.7882   1
  16  12   2-21.0667 41.7343   1
   3 -16 -12 4.75190 35.4738   1
  16  12   3-10.6966 40.4846   1
 -12   3 -16 10.6693 19.4869   1
  -3  16 -12-9.87125 23.1384   1
 -12   4 -16 3474.02 103.001   1
  -4  16 -12 3372.58 106.029   1
   4 -16 -12 3527.17 145.911   1
  16  12   4 3739.12 157.029   1
 -12   5 -16 372.233 26.0591   1
   5 -16 -12 450.847 56.2286   1
  16  12   5 392.031 61.8105   1
  16  12   6 1613.08 102.663   1
  16  12   7 825.669 80.8062   1
  16  12   8 219.808 51.6426   1
  16  12   9 266.965 55.2180   1
  16  12  10 760.126 74.6057   1
  16  12  11 625.622 69.7592   1
  12  16  12 150.107 50.0212   1
  16  12  12 160.820 53.7227   1
  16  12  13-17.3398 46.0873   1
  13  16  12 42.9141 52.6599   1
  16  12  14 2204.72 124.397   1
  14  16  12 2223.28 126.363   1
  15  16  12 1930.59 120.380   1
 -16 -13 -15 365.137 63.0432   1
 -15 -16 -13 327.497 62.2191   1
 -13 -15 -16 337.320 61.4444   1
 -13 -14 -16 4096.45 169.558   1
 -14 -16 -13 3883.96 169.624   1
 -16 -13 -14 3885.70 166.603   1
 -16 -13 -13 633.496 70.8487   1
 -13 -13 -16 593.609 70.2969   1
 -13 -16 -13 614.076 74.0407   1
 -12 -16 -13 2352.96 123.695   1
 -13 -12 -16 2133.18 117.830   1
 -16 -13 -12 2111.74 120.456   1
 -16 -13 -11 15.8150 43.5660   1
 -13 -11 -16-4.96584 44.6530   1
  11  16 -13-74.7213 50.3221   1
 -11 -16 -13-5.61457 47.9727   1
  10  16 -13 224.235 53.1969   1
 -16 -13 -10 188.123 50.9605   1
 -10 -16 -13 255.778 56.6040   1
 -13 -10 -16 233.013 50.4516   1
 -13  -9 -16 777.416 67.2737   1
   9  16 -13 926.031 71.7085   1
   8  16 -13 2532.29 116.491   1
 -13  -8 -16 2425.03 113.329   1
 -13  -7 -16 424.042 52.0805   1
   7  16 -13 434.979 55.2727   1
  16 -13   6 8602.47 210.485   1
 -13  -6 -16 8913.17 260.068   1
   6  16 -13 8576.82 259.265   1
   5  16 -13 347.835 52.5051   1
  16  13  -5 296.393 62.7836   1
 -13  -5 -16 423.672 48.7694   1
 -13  -4 -16 10406.7 287.157   1
   4  16 -13 10210.1 287.045   1
  16  13  -4 10176.2 315.263   1
  -4 -16 -13 9839.04 311.481   1
   3  16 -13 2765.81 112.838   1
  16  13  -3 2802.99 136.620   1
 -13  -3 -16 2945.80 112.369   1
  -3 -16 -13 2822.77 134.946   1
   2  16 -13 3767.21 132.099   1
  16  13  -2 3512.06 156.785   1
 -13  -2 -16 3857.64 131.418   1
  -2 -16 -13 3859.69 159.187   1
 -13  -1 -16 102.883 30.7575   1
   1  16 -13 126.754 31.4476   1
  16  13  -1 106.912 47.4161   1
  -1 -16 -13 60.9012 42.4812   1
   0 -16 -13 1612.43 97.5441   1
   0  16 -13 1759.25 76.6545   1
 -13   0 -16 1628.45 72.8566   1
  16  13   0 1659.71 101.543   1
  16  13   1 108.343 44.5592   1
 -13   1 -16 103.173 25.5422   1
  -1  16 -13 80.4199 25.9976   1
   1 -16 -13 108.955 41.4492   1
  16  13   2 3728.25 158.917   1
 -13   2 -16 3659.58 115.476   1
  -2  16 -13 3526.67 117.406   1
   2 -16 -13 3997.79 156.273   1
  -3  16 -13 2717.30 95.2073   1
   3 -16 -13 3151.55 134.534   1
 -13   3 -16 2752.12 92.0778   1
  16  13   3 3097.16 140.673   1
  16  13   4 10481.6 321.462   1
   4 -16 -13 10517.4 312.313   1
  -4  16 -13 10260.2 261.059   1
  16  13   5 299.449 60.1636   1
   5 -16 -13 402.058 58.5374   1
  16  13   6 9027.66 293.123   1
  16  13   7 388.809 63.7694   1
  16  13   8 2625.05 134.454   1
  16  13   9 816.580 79.8269   1
  16  13  10 222.803 54.4599   1
  16  13  11-17.7084 47.9320   1
  16  13  12 2382.90 129.049   1
  16  13  13 624.285 76.6721   1
  16  13  14 3869.21 171.492   1
  14  16  13 3900.86 173.741   1
  15  16  13 456.090 69.0542   1
 -15 -16 -14 822.060 81.4923   1
 -16 -14 -15 890.298 83.3200   1
 -14 -15 -16 769.693 79.7134   1
 -16 -14 -14 716.216 78.2850   1
 -14 -16 -14 585.842 71.3201   1
 -14 -14 -16 588.406 71.0154   1
 -13 -16 -14 860.643 82.9114   1
 -14 -13 -16 697.673 75.6032   1
 -16 -14 -13 720.779 77.0218   1
 -12 -16 -14 405.033 63.7129   1
 -16 -14 -12 333.493 60.4464   1
 -14 -12 -16 350.617 58.8315   1
 -16 -14 -11 2104.55 116.336   1
 -14 -11 -16 1979.37 111.696   1
 -11 -16 -14 2052.78 116.394   1
 -14 -10 -16 1978.06 106.950   1
 -16 -14 -10 1849.29 110.724   1
 -10 -16 -14 1969.53 114.653   1
  16  14  -9 287.127 57.2141   1
 -14  -9 -16 298.939 52.7118   1
  -9 -16 -14 254.005 56.0376   1
 -14  -8 -16 8.76768 38.8394   1
   7  16 -14 1871.50 99.1103   1
 -14  -7 -16 1950.40 99.4267   1
  16 -14   6 906.362 36.4682   1
   6  16 -14 1002.17 72.7152   1
 -14  -6 -16 1011.45 70.9982   1
   5  16 -14 109.320 39.4107   1
  16 -14   5 69.5199 19.1062   1
 -14  -5 -16 67.2491 36.7479   1
   4  16 -14 577.166 53.9891   1
  16  14  -4 548.561 68.0376   1
 -14  -4 -16 591.886 53.7863   1
 -14  -3 -16 734.216 56.0619   1
  16  14  -3 635.745 72.1005   1
  -3 -16 -14 595.314 67.8352   1
   3  16 -14 722.249 55.6237   1
   2  16 -14 433.538 44.1936   1
 -14  -2 -16 426.262 42.8072   1
  16  14  -2 352.678 59.5165   1
  -2 -16 -14 427.892 60.2872   1
   1  16 -14 66.7579 29.1151   1
 -14  -1 -16 42.0890 27.9273   1
  -1 -16 -14 51.8154 42.5866   1
  16  14  -1 33.2159 47.0572   1
  16  14   0 5206.03 199.775   1
   0 -16 -14 5335.76 195.793   1
   0  16 -14 5343.98 163.279   1
 -14   0 -16 5222.46 159.585   1
   1 -16 -14 45.8690 43.0960   1
 -14   1 -16 74.4171 24.3308   1
  -1  16 -14 73.5674 27.1714   1
  16  14   1 11.2144 44.4546   1
 -14   2 -16 432.414 35.4710   1
  -2  16 -14 398.852 36.1973   1
   2 -16 -14 445.556 57.5489   1
  16  14   2 517.696 65.0627   1
   3 -16 -14 556.076 61.0919   1
  16  14   3 574.523 68.7139   1
  -3  16 -14 574.769 39.7741   1
   4 -16 -14 570.758 64.9943   1
  16  14   4 596.645 70.0617   1
  -4  16 -14 580.038 37.1571   1
  16  14   5 58.7645 48.2988   1
  -6  16 -14 955.362 35.1571   1
  16  14   6 904.942 83.5861   1
  16  14   7 2184.15 124.437   1
  16  14   8 24.1316 49.5693   1
  16  14   9 381.637 63.6182   1
  16  14  10 1927.60 116.978   1
  16  14  11 2182.91 125.503   1
  16  14  12 448.694 73.1355   1
  16  14  13 840.600 86.2672   1
  16  14  14 703.708 82.8923   1
 -15 -15 -16 1006.97 89.2884   1
 -16 -15 -15 1041.82 90.1724   1
 -15 -16 -15 1068.97 90.4469   1
 -16 -15 -14 229.846 57.6545   1
 -14 -16 -15 240.821 58.6460   1
 -15 -14 -16 205.947 58.0060   1
 -16 -15 -13 3059.38 147.878   1
 -13 -16 -15 3372.16 154.772   1
 -15 -13 -16 3020.48 145.981   1
 -12 -16 -15 644.821 73.7118   1
 -16 -15 -12 623.162 73.8415   1
 -15 -12 -16 525.982 64.8557   1
 -15 -11 -16 2627.89 128.393   1
  16  15 -11 2920.75 141.418   1
 -16 -15 -11 2799.91 137.373   1
 -11 -16 -15 2412.42 133.659   1
  16  15 -10 750.029 75.9267   1
 -15 -10 -16 816.056 72.0467   1
 -10 -16 -15 896.811 80.7858   1
 -16 -15 -10 655.276 74.0516   1
  16  15  -9-5.78037 42.5402   1
  -9 -16 -15-22.9751 50.3763   1
 -15  -9 -16-4.65867 37.8288   1
  16  15  -8 398.118 61.2529   1
  -8 -16 -15 473.579 65.8448   1
 -15  -8 -16 435.388 53.8313   1
 -15  -7 -16 105.492 39.9851   1
  16 -15   6 432.104 24.5377   1
 -15  -6 -16 299.405 46.3213   1
   5  16 -15 987.900 70.2828   1
 -15  -5 -16 1163.24 73.1334   1
  16 -15   5 1027.10 46.0323   1
   4  16 -15 608.587 54.6949   1
 -15  -4 -16 638.384 53.9175   1
  16 -15   4 588.528 38.0925   1
   3  16 -15 2093.07 93.6954   1
 -15  -3 -16 2135.45 93.3758   1
  16  15  -3 1882.80 115.416   1
 -15  -2 -16 2143.41 91.7872   1
   2  16 -15 2111.21 93.5729   1
  16  15  -2 2055.91 117.734   1
  -2 -16 -15 2069.72 115.651   1
  -1 -16 -15-42.4681 47.9637   1
 -15  -1 -16 40.0939 28.7078   1
   1  16 -15 32.5417 29.8856   1
  16  15  -1-5.71206 48.8043   1
  16  15   0 3929.95 173.333   1
   0  16 -15 4403.99 138.865   1
   0 -16 -15 4078.23 168.049   1
 -15   0 -16 4182.84 135.348   1
   1 -16 -15 52.3810 43.7826   1
  -1  16 -15 2.49174 25.8426   1
  16  15   1 40.9414 46.9247   1
   2 -16 -15 2087.58 112.935   1
  -2  16 -15 1969.01 78.7416   1
  16  15   2 1968.92 115.912   1
  16  15   3 2052.31 116.423   1
  -3  16 -15 1941.37 75.1565   1
   3 -16 -15 1918.27 108.087   1
  -4  16 -15 549.835 35.7695   1
   4 -16 -15 520.872 61.4984   1
  16  15   4 383.632 64.9708   1
  16  15   5 1114.03 91.2435   1
  -6  16 -15 440.325 22.6812   1
  16  15   6 437.613 66.2584   1
  16  15   7 154.928 50.7366   1
  16  15   8 380.422 62.1079   1
  16  15   9-24.8848 46.4459   1
  16  15  10 761.443 78.6727   1
  16  15  11 2915.93 147.752   1
  16  15  12 635.264 80.2548   1
  16  15  13 3095.57 153.748   1
  16  15  14 131.095 59.2943   1
 -16 -16 -16-18.6709 51.7262   1
 -16 -15 -16 377.945 64.5189   1
 -15 -16 -16 355.445 65.6627   1
 -16 -16 -15 364.140 67.2425   1
 -16 -14 -16 399.650 64.2151   1
 -16 -16 -14 354.596 63.2438   1
 -14 -16 -16 360.074 62.2012   1
  16  16 -13 717.202 74.0765   1
 -16 -16 -13 915.203 83.4125   1
 -13 -16 -16 763.427 79.0772   1
 -16 -13 -16 725.280 74.6604   1
  16  16 -12 217.075 56.8838   1
 -16 -16 -12 125.590 53.8742   1
 -16 -12 -16 96.6776 47.9352   1
 -12 -16 -16 172.969 54.5042   1
  16  16 -11 854.998 80.5747   1
 -16 -16 -11 784.688 80.7591   1
 -11 -16 -16 851.996 83.3174   1
 -16 -11 -16 850.837 77.7501   1
 -16 -10 -16 207.494 50.3607   1
  16  16 -10 268.595 58.1569   1
 -16 -16 -10 275.310 62.7037   1
 -10 -16 -16 195.024 53.1302   1
 -16  -9 -16-23.6038 44.2654   1
  16  16  -9 11.8889 45.3074   1
  -9 -16 -16-52.7704 52.9783   1
  -8 -16 -16 1096.01 89.1180   1
  16  16  -8 956.976 84.0959   1
 -16  -8 -16 1038.17 76.3888   1
  16  16  -7 3155.27 153.098   1
 -16  -7 -16 3573.43 141.877   1
  -7 -16 -16 3519.07 157.027   1
 -16  -6 -16 24.4816 34.4933   1
  16 -16   6 37.2006 15.5833   1
 -16  -5 -16 285.433 45.9526   1
  16 -16   5 304.409 27.2479   1
   4  16 -16 1463.47 79.5024   1
  16 -16   4 1328.58 59.1085   1
 -16  -4 -16 1404.74 78.2169   1
  16 -16   3 3064.42 104.577   1
   3  16 -16 3055.94 120.157   1
 -16  -3 -16 3172.70 119.810   1
 -16  -2 -16 97.1493 32.9287   1
   2  16 -16 148.163 37.9244   1
  16  16  -2 35.2961 47.5352   1
  -1 -16 -16 2069.98 116.298   1
  16  16  -1 2166.14 122.288   1
   1  16 -16 2223.33 93.6186   1
   0  16 -16 381.816 40.4194   1
   0 -16 -16 303.036 56.8978   1
  16  16   0 389.884 63.3965   1
  -1  16 -16 1905.40 81.8246   1
  16  16   1 1955.60 118.253   1
  16  16   2 73.4889 46.3858   1
  -2  16 -16 56.4622 26.8952   1
   2 -16 -16 128.987 48.3520   1
   3 -16 -16 3034.89 142.234   1
  -3  16 -16 3196.67 104.668   1
  16  16   3 3372.79 156.289   1
  -4  16 -16 1388.21 57.6159   1
   4 -16 -16 1313.21 92.6321   1
  16  16   4 1461.51 103.140   1
  16  16   5 201.455 60.2393   1
  16  16   6 38.0910 48.0580   1
  -6  16 -16 20.0402 13.7074   1
  16  16   7 3582.09 166.337   1
  16  16   8 1158.67 92.9755   1
  16  16   9 6.40501 45.3967   1
  16  16  10 238.235 59.7930   1
  16  16  11 813.199 83.5028   1
  16  16  12 196.194 57.5239   1
  16  16  13 803.147 84.6629   1
   0  17   0 36.8763 29.2547   1
   0 -17   0 3.67583 32.8929   1
   1  17   0 3.49824 32.2090   1
   1 -17   0 32.2453 33.7426   1
  -1 -17   0-11.3255 32.9410   1
  -2 -17   0 47130.8 1126.22   1
   2  17   0 47854.0 1123.07   1
   2 -17   0 47115.9 1119.33   1
   3 -17   0 17.2030 30.7998   1
  -3 -17   0 87.8210 39.0744   1
  17   0   3 46.6860 31.2806   1
   3  17   0 30.6598 36.5816   1
   4 -17   0 11058.1 301.569   1
  17   0   4 10658.9 297.460   1
  -4 -17   0 10736.0 312.534   1
   4  17   0 10958.3 311.017   1
   5 -17   0-6.60409 28.3635   1
  17   0   5 12.9646 24.0248   1
  -5 -17   0 4.27366 32.5708   1
   5  17   0-25.1493 33.6275   1
   6 -17   0 5255.78 174.155   1
   6  17   0 5871.66 194.581   1
  17   0   6 5617.16 175.767   1
  -6 -17   0 5447.61 190.581   1
  -7 -17   0 31.5478 29.3416   1
   7  17   0-9.12375 30.5138   1
   7 -17   0 3.21077 22.5787   1
  17   0   7-28.9505 27.3353   1
  17   0   8 110.007 29.9911   1
   8  17   0 47.1965 32.7165   1
   8 -17   0 97.5625 27.1040   1
   9  17   0 19.5178 32.9246   1
   9 -17   0-12.4418 26.8616   1
  17   0   9-35.5759 34.3857   1
  10 -17   0 8241.86 234.407   1
  17   0  10 8175.87 236.077   1
  17   0  11 15.6602 31.6383   1
  11 -17   0-3.02365 28.7274   1
  17   0  12 18145.8 467.026   1
  12 -17   0 18969.2 468.329   1
  13 -17   0-15.0946 34.0468   1
  17   0  13-33.7812 35.4788   1
  14 -17   0 10827.2 294.831   1
   0  15 -17-5.47541 27.1181   1
  15  17   0 47.9354 51.1943   1
  16  17   0 24.7167 48.0524   1
   0 -16 -17 44.5106 43.2700   1
   0  16 -17 67.6688 27.8406   1
  16  17  -1 24.5892 45.2399   1
   1  16 -17-9.13631 30.9992   1
  16 -17   1 5.80845 24.6796   1
  15 -17   1 310.915 39.4365   1
  14 -17   1 96.2551 31.4005   1
  13 -17   1 4930.11 155.691   1
  17  -1  12 55.8661 30.2482   1
  12 -17   1 84.6740 31.2710   1
  11 -17   1 3400.09 121.308   1
  17  -1  11 3444.93 120.865   1
  10 -17   1 34.9247 25.8025   1
  -1 -10 -17 88.7524 38.7329   1
  10  17  -1 50.2467 38.3063   1
  17  -1  10 26.5659 29.1366   1
   9  17  -1 940.305 72.6036   1
   9 -17   1 934.418 58.2030   1
  17  -1   9 787.432 54.4910   1
  -8 -17  -1 595.430 58.4939   1
   8 -17   1 567.351 45.7333   1
  17  -1   8 598.818 46.6046   1
   8  17  -1 500.810 55.8056   1
   7  17  -1 8.96864 33.4835   1
   7 -17   1 27.3639 22.8672   1
  -7 -17  -1 45.6784 31.8729   1
  17  -1   7 39.1256 25.1646   1
   6 -17   1 135.746 30.9282   1
   6  17  -1 125.235 37.7840   1
  17  -1   6 136.376 30.2669   1
  -6 -17  -1 93.6088 35.8698   1
   5 -17   1 353.469 39.7799   1
  17  -1   5 421.475 41.9425   1
  -5 -17  -1 359.021 47.3939   1
   4  17  -1 43.7690 39.5797   1
  -4 -17  -1 37.5864 35.4993   1
  17  -1   4 68.9058 29.2477   1
   4 -17   1 6.46482 28.6504   1
  -3 -17  -1 6950.23 220.655   1
   3 -17   1 6843.41 208.365   1
   3  17  -1 6820.68 215.865   1
   2  17  -1 1789.80 90.6126   1
   2 -17   1 1893.05 89.8538   1
  -2 -17  -1 1876.43 95.0979   1
   1 -17   1 110.874 30.1239   1
   1  17  -1 71.7715 32.5147   1
  -1 -17  -1 34.8016 34.1286   1
   0 -17   1-25.1140 32.4151   1
   0  17  -1 65.0852 31.1858   1
   0 -17  -1-18.9425 32.3684   1
   0  17   1-17.3655 34.4021   1
  -1  17  -1 124.603 32.9122   1
  -1 -17   1 25.7213 29.6862   1
   1  17   1 14.2887 36.5207   1
   1 -17  -1 70.8688 32.9051   1
  -2 -17   1 1720.28 88.6895   1
   2 -17  -1 1762.48 86.5316   1
   2  17   1 1616.00 87.2545   1
   3 -17  -1 7107.96 212.759   1
  -3 -17   1 6957.18 217.549   1
  17   1   3 6501.27 207.568   1
   3  17   1 6847.71 216.446   1
   4  17   1 65.0431 37.9579   1
  17   1   4 58.9608 35.4504   1
  -4 -17   1 48.8034 34.9477   1
   4 -17  -1 17.5613 30.0244   1
   5  17   1 341.908 48.0164   1
   5 -17  -1 283.851 38.4621   1
  -5 -17   1 213.681 43.1176   1
  17   1   5 306.590 39.4787   1
  17   1   6 75.1658 32.4338   1
   6  17   1 137.306 37.7370   1
   6 -17  -1 160.329 33.4925   1
  17   1   7 55.0567 26.4216   1
   7  17   1 36.9305 30.8946   1
   7 -17  -1 43.4647 26.3480   1
   8 -17  -1 570.384 48.8943   1
  17   1   8 534.494 48.9496   1
   8  17   1 577.301 58.9883   1
   9 -17  -1 888.374 58.2929   1
  17   1   9 848.300 60.2607   1
  17   1  10 110.407 31.8369   1
  10 -17  -1 80.3749 30.7504   1
  11 -17  -1 3303.70 122.463   1
  17   1  11 3391.47 126.515   1
  17   1  12 53.6475 36.7483   1
  12 -17  -1 6.39911 32.0754   1
  13 -17  -1 4968.61 163.063   1
  17   1  13 5030.21 165.141   1
  14  17   1 146.654 56.5503   1
   1 -15 -17 447.438 62.6462   1
  -1  15 -17 383.263 40.5330   1
  15  17   1 303.644 62.8549   1
  16  17   1-43.6959 50.0804   1
   1 -16 -17 11.0948 43.4068   1
  -1  16 -17-7.68935 26.5805   1
   2  16 -17 114.364 36.6779   1
  16 -17   2 79.0748 31.4871   1
  15 -17   2 11326.8 298.254   1
  14 -17   2 666.833 48.1048   1
  13 -17   2-10.4542 25.9923   1
  12 -17   2 2442.85 94.5030   1
  17  -2  12 2363.35 90.9695   1
  -2 -11 -17 1197.84 81.5260   1
  17  -2  11 1425.94 66.1746   1
  11 -17   2 1393.80 67.5139   1
  11  17  -2 1314.93 89.1665   1
  10 -17   2 1751.04 78.1363   1
  17  -2  10 1901.53 79.9463   1
  10  17  -2 1809.00 101.222   1
  -2 -10 -17 1786.26 96.0885   1
  -2  -9 -17 186.630 40.5724   1
   9  17  -2 276.371 48.5088   1
  17  -2   9 294.334 34.8174   1
   9 -17   2 273.468 34.4410   1
  -9 -17  -2 326.095 47.2261   1
   8 -17   2 1060.22 58.8318   1
   8  17  -2 913.557 71.4081   1
  17  -2   8 1121.88 59.8235   1
  -8 -17  -2 1007.40 74.8759   1
  -7 -17  -2 1938.79 101.737   1
   7  17  -2 2074.85 103.184   1
  17  -2   7 2043.80 85.7403   1
   7 -17   2 2009.53 85.2877   1
  -6 -17  -2 243.262 43.0718   1
  17  -2   6 245.666 32.8661   1
   6  17  -2 161.343 39.7475   1
   6 -17   2 210.472 32.1894   1
  17  -2   5 14430.4 370.277   1
   5 -17   2 14398.6 371.141   1
   5  17  -2 13796.3 387.672   1
  -5 -17  -2 14516.3 394.247   1
  17  -2   4 1148.93 63.7624   1
   4  17  -2 1113.48 73.8800   1
  -4 -17  -2 1084.06 73.7093   1
   4 -17   2 1154.92 64.7147   1
   3  17  -2 14032.4 381.140   1
   3 -17   2 14185.7 371.146   1
  -3 -17  -2 14244.2 386.785   1
   2  17  -2 2668.12 110.384   1
   2 -17   2 2618.69 106.731   1
  -2 -17  -2 2644.81 116.323   1
   1 -17   2 1512.34 79.7580   1
  -1 -17  -2 1529.64 85.8905   1
   0  17  -2 3.18909 26.9552   1
   0 -17   2-34.8168 31.4593   1
   0 -17  -2-15.7101 35.4873   1
  -1  17  -2 1688.56 77.7592   1
  -1 -17   2 1523.29 81.7904   1
   1  17   2 1408.96 81.3680   1
   1 -17  -2 1743.61 87.5273   1
  -2 -17   2 2702.77 112.622   1
   2 -17  -2 2609.87 111.468   1
   2  17   2 2518.31 111.679   1
  17   2   2 2626.30 110.872   1
  -3 -17   2 14496.8 386.193   1
  17   2   3 13773.9 379.783   1
   3 -17  -2 14246.6 381.804   1
   3  17   2 14565.5 387.359   1
   4 -17  -2 1014.93 69.0548   1
   4  17   2 1219.79 75.5920   1
  17   2   4 1126.86 70.0259   1
   5  17   2 14383.9 389.809   1
  17   2   5 14189.8 377.770   1
   5 -17  -2 13931.8 377.405   1
  17   2   6 199.223 35.8434   1
   6  17   2 238.239 41.9171   1
   6 -17  -2 290.107 40.6125   1
   7 -17  -2 2066.95 93.8699   1
   7  17   2 2108.92 107.271   1
  17   2   7 1992.06 95.6244   1
  17   2   8 1090.67 67.6923   1
   8 -17  -2 1042.97 65.0405   1
   9 -17  -2 295.326 38.7779   1
  17   2   9 325.098 41.3276   1
  10 -17  -2 1896.03 87.3168   1
  17   2  10 1801.13 89.0768   1
  17   2  11 1489.80 80.1598   1
  11 -17  -2 1463.73 76.0210   1
  17   2  12 2576.35 110.203   1
  12 -17  -2 2733.46 109.699   1
  17   2  13 28.7452 34.5853   1
  13  17   2 22.8819 43.6014   1
  14  17   2 689.869 75.9318   1
  -2  14 -17 664.939 45.4301   1
   2 -14 -17 684.753 70.2588   1
  15  17   2 11363.5 353.191   1
  -2  15 -17 11246.2 293.568   1
   2 -15 -17 11800.0 344.242   1
   2 -16 -17 143.607 49.9591   1
  -2  16 -17 82.8380 29.2126   1
  16  17   2 144.271 57.8011   1
  16 -17   3 101.602 28.8682   1
  15 -17   3 1131.13 58.8898   1
  14 -17   3 183.804 30.9919   1
  13 -17   3 1426.50 66.2636   1
  17  -3  12 2.19777 22.0294   1
  12 -17   3-9.73713 23.4276   1
  12  17  -3-5.24550 45.2962   1
  17  -3  11 870.685 48.4257   1
  11  17  -3 863.775 73.9769   1
  11 -17   3 839.139 50.2811   1
  -3 -11 -17 859.774 70.3140   1
 -10 -17  -3-10.0827 38.4228   1
  10 -17   3 7.46521 21.4900   1
  10  17  -3 39.2354 37.8809   1
  -3 -10 -17 17.6688 33.4377   1
  17  -3  10 21.6140 22.3172   1
   9 -17   3 5040.12 153.807   1
  17  -3   9 4778.50 150.873   1
  -9 -17  -3 5033.12 184.759   1
  -3  -9 -17 5220.68 177.898   1
   9  17  -3 4942.08 181.573   1
  -8 -17  -3 462.869 54.6133   1
  -3  -8 -17 558.665 55.2821   1
  17  -3   8 521.096 40.6448   1
   8 -17   3 538.005 41.9977   1
   8  17  -3 526.553 56.5043   1
  -3  -7 -17 679.749 56.4682   1
  17  -3   7 767.992 48.6602   1
  -7 -17  -3 705.877 61.7156   1
   7  17  -3 825.311 64.0855   1
   7 -17   3 745.294 47.8044   1
   6  17  -3 2454.95 111.094   1
  -6 -17  -3 2217.74 110.373   1
  17  -3   6 2360.75 91.7011   1
   6 -17   3 2467.43 94.1361   1
  -5 -17  -3 111.368 36.6869   1
   5 -17   3 110.101 26.4715   1
   5  17  -3 72.2390 39.9909   1
  17  -3   5 145.975 29.5920   1
   4  17  -3 104.240 37.4278   1
   4 -17   3 122.417 28.9045   1
  -4 -17  -3 186.831 42.4449   1
   3  17  -3 174.036 41.2079   1
   3 -17   3 193.485 32.9863   1
  -3 -17  -3 225.649 42.8993   1
  -2 -17  -3 742.361 60.7634   1
   2 -17   3 582.756 48.1684   1
   2  17  -3 734.873 55.2996   1
   1 -17   3 3137.94 121.133   1
  -1 -17  -3 3365.37 133.575   1
   1  17  -3 3258.05 121.838   1
   0 -17   3-27.2581 34.4221   1
   0  17  -3-18.6393 25.5286   1
   1 -17  -3 3386.29 136.391   1
  -1  17  -3 3665.98 125.706   1
  -1 -17   3 3502.74 131.049   1
  -2 -17   3 680.489 55.4885   1
   2  17   3 676.962 59.3715   1
   2 -17  -3 668.068 55.0932   1
  17   3   2 666.728 55.8842   1
  -2  17  -3 712.863 49.5399   1
   3  17   3 225.832 39.6839   1
   3 -17  -3 239.055 39.6305   1
  17   3   3 280.267 42.9732   1
  17   3   4 144.712 38.4744   1
   4  17   3 159.393 40.8541   1
   4 -17  -3 159.172 36.9414   1
   5  17   3 125.911 36.9956   1
  17   3   5 114.056 34.9479   1
   5 -17  -3 126.570 35.3190   1
   6  17   3 2118.19 106.253   1
   6 -17  -3 2131.18 98.0198   1
  17   3   6 2329.02 103.270   1
   7 -17  -3 788.543 59.0507   1
  17   3   7 792.298 60.7223   1
  17   3   8 543.486 50.7848   1
   8 -17  -3 445.801 45.1168   1
   9 -17  -3 5235.40 171.404   1
  17   3   9 5093.86 175.832   1
  10 -17  -3-3.53766 26.7800   1
  17   3  10-19.6516 36.0200   1
  17   3  11 847.306 63.6437   1
  11 -17  -3 811.275 59.3200   1
  12  17   3-61.9347 48.8818   1
  17   3  12-15.4546 34.0680   1
  13  17   3 1463.60 99.0322   1
  17   3  13 1378.61 81.1027   1
  14  17   3 113.609 47.7660   1
  -3  14 -17 126.714 26.7473   1
  17   3  14 152.460 41.8061   1
   3 -15 -17 1228.97 88.5671   1
  -3  15 -17 1185.26 56.1133   1
  15  17   3 1066.65 93.3259   1
  16  17   3 215.652 62.1635   1
  -3  16 -17 143.193 29.0170   1
   3 -16 -17 149.654 50.1975   1
 -17  -4 -16 556.428 52.3911   1
  16 -17   4 535.987 39.9156   1
  15 -17   4 2894.97 98.4612   1
  14 -17   4 5152.85 149.746   1
  -4 -14 -17 4922.83 191.896   1
  13 -17   4 1438.99 62.4878   1
  -4 -13 -17 1267.52 88.8649   1
  13  17  -4 1279.18 93.1526   1
  12 -17   4 416.851 34.5524   1
  12  17  -4 468.924 59.4479   1
  -4 -12 -17 578.774 62.3794   1
  11 -17   4 87.3848 24.9764   1
  11  17  -4 80.3105 40.0941   1
  17  -4  11 107.157 23.6623   1
  -4 -11 -17 190.411 45.6949   1
 -11 -17  -4 125.115 44.1236   1
  -4 -10 -17 836.683 67.2347   1
  10  17  -4 642.800 62.2536   1
  17  -4  10 698.989 43.5250   1
 -10 -17  -4 709.441 69.9049   1
  10 -17   4 676.980 44.7262   1
   9  17  -4 27.8640 36.3405   1
  -4  -9 -17 21.2973 34.9991   1
  -9 -17  -4 69.9708 37.5754   1
  17  -4   9 20.1059 21.8666   1
   9 -17   4 6.87059 20.8957   1
  -8 -17  -4 116.515 40.6468   1
  -4  -8 -17 85.1847 32.0312   1
  17  -4   8 118.303 24.9461   1
   8 -17   4 108.898 25.3679   1
   8  17  -4 98.9447 35.7187   1
  -7 -17  -4 2342.41 115.103   1
   7 -17   4 2569.70 94.0792   1
  17  -4   7 2520.41 92.2287   1
  -4  -7 -17 2581.23 110.945   1
   7  17  -4 2548.58 116.226   1
  -6 -17  -4 830.298 67.6629   1
  -4  -6 -17 867.556 61.7510   1
   6 -17   4 915.285 51.5263   1
  17  -4   6 917.075 50.8831   1
   6  17  -4 853.325 63.6663   1
   5 -17   4 2521.44 93.9834   1
  -5 -17  -4 2283.26 110.548   1
   5  17  -4 2280.06 105.980   1
  17  -4   5 2402.38 91.2624   1
  -4  -5 -17 2187.61 99.1360   1
  -4 -17  -4-4.44348 31.2470   1
   4  17  -4-3.78668 36.4430   1
   4 -17   4-5.57286 21.0925   1
   3 -17   4 1821.35 82.1377   1
  -3 -17  -4 2038.70 100.287   1
   3  17  -4 1790.05 90.4328   1
   2 -17   4 3769.80 131.665   1
   2  17  -4 3815.17 137.848   1
  -2 -17  -4 3759.59 147.204   1
   1 -17   4 1030.52 62.1734   1
   1  17  -4 885.552 59.5740   1
  -1 -17  -4 967.791 69.3992   1
   0 -17  -4-29.0184 35.9869   1
   0  17  -4-6.15582 28.4718   1
   1 -17  -4 1035.41 69.2868   1
  -1  17  -4 948.268 57.6984   1
  17   4   1 920.410 67.4951   1
  17   4   2 3829.59 146.292   1
  -2  17  -4 3940.25 130.542   1
   2 -17  -4 3946.74 147.112   1
  17   4   3 1801.77 93.1384   1
   3  17   4 1979.05 98.9139   1
   4  17   4 12.7885 29.0093   1
  17   4   4-8.01228 28.3941   1
   4 -17  -4-7.80769 26.1122   1
   5 -17  -4 2460.57 106.408   1
  17   4   5 2487.56 107.907   1
   5  17   4 2187.21 109.860   1
   6 -17  -4 882.418 60.9965   1
  17   4   6 861.588 62.6742   1
   7 -17  -4 2475.79 107.061   1
  17   4   7 2530.87 112.453   1
  17   4   8 73.7846 36.0124   1
   8 -17  -4 111.211 33.5583   1
  17   4   9 33.2004 37.6880   1
   9 -17  -4 51.7089 34.0202   1
  10 -17  -4 772.086 58.5725   1
  17   4  10 712.120 61.4275   1
  17   4  11 116.050 37.5464   1
  11  17   4 132.005 45.2722   1
  17   4  12 529.800 54.9295   1
  12  17   4 551.150 64.2091   1
  17   4  13 1426.36 83.0417   1
  -4  13 -17 1288.66 54.5754   1
  13  17   4 1338.47 96.7915   1
  -4  14 -17 5317.84 145.927   1
  14  17   4 5321.26 207.819   1
  17   4  14 4996.55 179.569   1
  -4  15 -17 2893.88 92.2601   1
  15  17   4 2760.58 143.644   1
   4 -16 -17 716.200 71.2825   1
  16  17   4 578.518 74.2812   1
  -4  16 -17 546.362 36.3271   1
 -17  -5 -16 3.89512 30.8659   1
  16 -17   5-1.65494 17.8372   1
  15 -17   5 824.927 42.1621   1
  -5 -15 -17 797.803 76.6106   1
 -17  -5 -15 747.961 61.3238   1
  14 -17   5 117.314 22.0295   1
  14  17  -5 39.0626 45.6280   1
  -5 -14 -17 53.7785 44.2330   1
  -5 -13 -17 41.4047 41.7831   1
  13 -17   5 38.3906 17.3747   1
  13  17  -5 32.2748 42.0979   1
 -12 -17  -5 16.1468 39.3239   1
  12 -17   5 17.8866 18.4853   1
  12  17  -5-10.3912 44.1532   1
  -5 -12 -17 59.5029 39.7834   1
  -5 -11 -17 3152.28 136.268   1
 -11 -17  -5 2954.18 140.393   1
  17  -5  11 3084.62 95.9471   1
  11  17  -5 3298.01 141.208   1
  11 -17   5 3212.47 100.916   1
  17  -5  10 163.092 24.3928   1
  10 -17   5 180.170 26.2108   1
  -5 -10 -17 197.837 43.8127   1
 -10 -17  -5 165.500 45.2976   1
  10  17  -5 192.037 44.7817   1
   9 -17   5 13940.7 342.220   1
  -9 -17  -5 13428.9 389.914   1
  -5  -9 -17 13972.9 379.067   1
   9  17  -5 13671.2 382.809   1
  17  -5   9 13475.1 340.151   1
  17  -5   8 10.4135 20.0443   1
   8 -17   5-10.6762 22.7013   1
   8  17  -5 8.86277 35.1156   1
  -8 -17  -5 29.4642 36.4006   1
  -5  -8 -17 36.7920 33.3915   1
  17  -5   7 880.923 48.4748   1
   7 -17   5 831.720 47.9393   1
  -5  -7 -17 908.101 64.0317   1
   7  17  -5 1011.11 69.1645   1
  -7 -17  -5 886.655 71.7572   1
  17  -5   6 11.5278 19.0645   1
   6  17  -5 36.8822 30.1662   1
  -5  -6 -17 70.4233 28.8231   1
  -6 -17  -5 51.8146 33.1309   1
   6 -17   5 21.4786 19.9582   1
   5  17  -5 325.312 43.3689   1
   5 -17   5 350.130 34.5058   1
  17  -5   5 348.262 33.2699   1
  -5 -17  -5 342.290 47.5407   1
  -5  -5 -17 369.081 42.3804   1
   4  17  -5 139.294 34.1062   1
  -5  -4 -17 103.276 27.3269   1
   4 -17   5 126.959 25.2538   1
  -4 -17  -5 72.6385 33.9836   1
   3  17  -5 563.120 50.4755   1
  -5  -3 -17 531.568 45.6086   1
  -3 -17  -5 592.941 55.8263   1
   2  17  -5 1079.64 66.0751   1
  -5  -2 -17 1081.41 61.2195   1
  -2 -17  -5 1072.96 74.7161   1
  -1 -17  -5 8264.50 257.084   1
   1  17  -5 8528.10 242.148   1
  17   5   0 21.0891 31.0405   1
   0 -17  -5-8.54621 32.3461   1
   0  17  -5 6.06238 26.5855   1
  17   5   1 8087.92 252.630   1
  -1  17  -5 8550.14 234.769   1
   1 -17  -5 8314.72 255.457   1
   2 -17  -5 1094.54 73.0531   1
  17   5   2 1030.67 70.9111   1
  -2  17  -5 1188.95 60.4607   1
  17   5   3 587.105 54.1027   1
  -3  17  -5 627.492 42.7908   1
   3 -17  -5 562.817 53.5501   1
   4  17   5 52.4620 31.2898   1
  17   5   4 112.685 33.7444   1
   4 -17  -5 104.508 31.3115   1
  17   5   5 407.120 47.0645   1
   5 -17  -5 357.642 43.3397   1
  17   5   6 72.3796 30.6701   1
   6 -17  -5 42.8891 27.8781   1
   7 -17  -5 926.402 63.2398   1
  17   5   7 952.554 68.2455   1
   8 -17  -5 30.8263 29.7627   1
  17   5   8-8.64194 41.2319   1
   9 -17  -5 14081.1 380.824   1
  17   5   9 14165.4 390.135   1
  10  17   5 251.870 53.9122   1
  17   5  10 174.936 45.2546   1
  17   5  11 3065.28 131.367   1
  11  17   5 3287.40 147.834   1
  17   5  12 43.4316 38.6705   1
  12  17   5-51.4338 48.2992   1
  17   5  13 17.4301 36.4228   1
  13  17   5 17.7644 45.4349   1
  17   5  14 39.5513 38.9370   1
  14  17   5-6.11032 53.3186   1
  15  17   5 736.375 80.9332   1
  16  17   5-19.5080 54.9590   1
  -6 -16 -17 1879.73 113.726   1
 -17  -6 -16 2106.33 102.366   1
  16  17  -6 1916.70 117.364   1
  16 -17   6 1928.32 60.5984   1
  15  17  -6 3100.69 149.144   1
  15 -17   6 3219.97 90.3427   1
  -6 -15 -17 3195.13 148.616   1
 -17  -6 -15 3397.06 132.150   1
  14  17  -6 916.475 79.9685   1
  14 -17   6 972.075 40.0863   1
  -6 -14 -17 943.964 79.2590   1
 -17  -6 -14 990.246 69.3941   1
  13 -17   6 255.435 21.6679   1
  13  17  -6 182.679 47.6807   1
  -6 -13 -17 267.134 50.7081   1
  12 -17   6 8.19509 14.7710   1
  12  17  -6-25.8334 45.3145   1
 -12 -17  -6 54.3992 37.9490   1
  -6 -12 -17-55.3268 42.7415   1
  11  17  -6 402.494 55.1782   1
  11 -17   6 508.355 31.2682   1
 -11 -17  -6 555.698 63.9111   1
  -6 -11 -17 451.237 54.8827   1
  10 -17   6 57.0840 19.4839   1
  10  17  -6 76.5512 38.8713   1
  17  -6  10 53.5724 17.4905   1
  -6 -10 -17 101.230 37.6072   1
 -10 -17  -6 26.0724 38.9491   1
  -6  -9 -17 923.399 68.0144   1
   9 -17   6 873.152 43.9216   1
  -9 -17  -6 859.212 74.2645   1
   9  17  -6 743.223 65.2463   1
  17  -6   9 779.992 42.3264   1
   8 -17   6 1545.97 63.6247   1
   8  17  -6 1592.89 90.0377   1
  -8 -17  -6 1569.13 96.6150   1
  -6  -8 -17 1650.39 88.8142   1
  17  -6   8 1514.86 62.7441   1
  17  -6   7 321.894 30.6719   1
  -7 -17  -6 244.301 47.7801   1
   7  17  -6 307.728 45.8630   1
  -6  -6 -17 2217.20 98.3122   1
  17  -6   6 1958.83 76.7652   1
  -6 -17  -6 1923.04 103.512   1
   6  17  -6 2037.78 99.8434   1
  -6  -5 -17 3552.42 132.304   1
  -5 -17  -6 3268.34 143.044   1
   4  17  -6 199.852 37.1267   1
  -4 -17  -6 243.114 42.1158   1
  -6  -4 -17 218.271 34.7818   1
  -3 -17  -6 317.315 47.3486   1
  -6  -3 -17 338.553 37.7602   1
   3  17  -6 297.699 41.3154   1
  -6  -2 -17 2182.57 91.5933   1
  -2 -17  -6 2134.59 105.689   1
   2  17  -6 2097.68 94.2785   1
  -1 -17  -6 1410.19 85.6390   1
   1  17  -6 1573.64 77.8091   1
  -6  -1 -17 1553.41 72.6240   1
  -6   0 -17 13.1709 21.6434   1
   0 -17  -6 4.40973 31.7398   1
   0  17  -6 2.98958 27.2701   1
  17   6   0 13.1153 31.2272   1
  -6   1 -17 1512.60 68.1826   1
  17   6   1 1454.47 86.0572   1
   1 -17  -6 1609.12 89.5150   1
  -1  17  -6 1565.31 73.0109   1
   2 -17  -6 2249.48 106.137   1
  17   6   2 2382.93 108.752   1
  17   6   3 270.893 43.7544   1
   3 -17  -6 214.563 40.9840   1
  -3  17  -6 220.894 29.1543   1
  17   6   4 214.331 40.5770   1
   4 -17  -6 230.428 40.5703   1
  17   6   5 3391.95 138.717   1
   5 -17  -6 3375.77 134.200   1
   6 -17  -6 2003.25 98.3809   1
  17   6   6 2032.30 103.505   1
   7 -17  -6 329.442 43.4455   1
  17   6   7 394.040 51.2178   1
   8 -17  -6 1731.65 89.0462   1
  17   6   8 1717.96 95.5645   1
   9 -17  -6 820.721 61.4761   1
  17   6   9 845.030 68.1171   1
  10  17   6 53.6592 44.3588   1
  17   6  10 55.1552 37.3411   1
  17   6  11 583.696 59.7085   1
  11  17   6 446.275 61.6188   1
  12  17   6-17.3040 47.3901   1
  17   6  12 22.8883 38.2606   1
  13  17   6 220.914 51.0109   1
  -6  13 -17 263.171 19.4735   1
  17   6  14 964.953 75.6638   1
  -6  14 -17 1018.78 36.9047   1
  14  17   6 823.439 81.9301   1
  -6  15 -17 3125.63 83.7112   1
  15  17   6 2907.70 149.162   1
  16  17   6 1711.44 116.553   1
  -6  16 -17 1861.06 54.5990   1
  16  17  -7 1645.46 107.941   1
 -17  -7 -16 1719.79 95.3375   1
  -7 -16 -17 1720.77 110.575   1
  -7 -15 -17 17.1215 44.6575   1
 -17  -7 -15 12.8490 36.9865   1
  15  17  -7 23.1742 45.6232   1
  14  17  -7 1200.42 88.6267   1
 -17  -7 -14 1181.00 77.6950   1
  -7 -14 -17 1280.62 91.3540   1
  13  17  -7 37.7459 43.0213   1
  -7 -13 -17 95.2769 42.4912   1
  12  17  -7 72.7156 44.1586   1
  -7 -12 -17 50.9440 46.9248   1
 -11 -17  -7 199.611 45.9821   1
  11  17  -7 134.728 44.7895   1
  -7 -11 -17 146.139 43.7314   1
  17  -7  10 452.691 24.1918   1
 -10 -17  -7 388.277 55.4766   1
  -7 -10 -17 446.457 53.9777   1
  10  17  -7 395.589 53.8041   1
  -7  -9 -17 2627.69 120.907   1
   9  17  -7 2759.79 123.147   1
  -9 -17  -7 2629.20 128.781   1
  17  -7   9 2735.90 82.5851   1
   8  17  -7 2074.24 102.395   1
  -7  -8 -17 1836.61 98.1214   1
  17  -7   8 2009.33 70.5768   1
  17  -7   7 1208.91 53.7866   1
   7  17  -7 1180.52 77.0703   1
  -7 -17  -7 1277.80 86.3689   1
  -7  -7 -17 1185.81 74.5204   1
  -7  -6 -17 3902.85 146.265   1
  17  -7   6 4029.74 121.328   1
   6  17  -7 4047.39 149.733   1
  -6 -17  -7 3827.25 158.163   1
  -7  -5 -17 54.0464 30.9823   1
   5  17  -7 80.3633 33.2496   1
  -5 -17  -7 58.2801 36.2841   1
  -4 -17  -7 119.400 40.6210   1
  -7  -4 -17 74.5947 28.8633   1
   4  17  -7 55.0485 29.6702   1
   3  17  -7 386.603 45.3997   1
  -7  -3 -17 337.874 40.4252   1
  -3 -17  -7 435.293 52.0276   1
   2  17  -7 3271.70 121.460   1
  -2 -17  -7 2957.52 131.448   1
  -7  -2 -17 3139.30 116.100   1
  -1 -17  -7 1302.22 83.2629   1
  17   7  -1 1345.48 83.0753   1
   1  17  -7 1368.58 71.5463   1
  -7  -1 -17 1334.83 67.9345   1
  -7   0 -17-2.63110 20.8510   1
  17   7   0-22.8289 33.1114   1
   0 -17  -7 13.6159 31.4064   1
   0  17  -7-23.5487 26.4684   1
   1 -17  -7 1324.90 81.8608   1
  17   7   1 1393.01 85.3825   1
  -1  17  -7 1383.22 67.1035   1
  -7   1 -17 1282.26 62.5149   1
  -2  17  -7 3294.34 113.019   1
  -7   2 -17 3330.43 109.431   1
  17   7   2 3481.41 140.365   1
   2 -17  -7 3058.86 132.586   1
  -7   3 -17 347.615 32.4191   1
   3 -17  -7 405.497 50.2198   1
  -3  17  -7 354.248 33.9798   1
  17   7   3 439.643 55.0911   1
  -7   4 -17 62.9709 19.7582   1
  -4  17  -7 68.5237 22.7924   1
   4 -17  -7 29.6239 33.5604   1
  17   7   4 63.7489 35.6527   1
   5 -17  -7 63.2615 31.7749   1
  -7   5 -17 108.022 21.4923   1
  17   7   5 96.5204 35.7941   1
  -7   6 -17 3987.52 116.092   1
   6 -17  -7 3972.61 150.180   1
  17   7   6 4032.52 157.324   1
  17   7   7 1325.27 84.1904   1
  -7   7 -17 1238.03 49.8676   1
   7 -17  -7 1188.36 77.8640   1
  17   7   8 1993.11 106.804   1
   8  17   7 2149.30 113.499   1
   8 -17  -7 2059.06 100.615   1
  -7   8 -17 1988.74 65.6604   1
  17   7   9 2665.83 124.943   1
   9  17   7 2639.30 128.073   1
  10  17   7 446.118 57.9786   1
  17   7  10 391.014 51.6215   1
  11  17   7 184.627 49.2238   1
  17   7  11 188.084 42.9046   1
  -7  11 -17 172.951 14.1844   1
  12  17   7 17.2885 43.6250   1
  17   7  12 24.0464 38.1127   1
  13  17   7 47.8866 46.5462   1
  17   7  13 43.4893 47.1026   1
  14  17   7 1354.14 99.3871   1
  17   7  14 1106.11 83.9198   1
  15  17   7-63.7358 55.0557   1
  16  17   7 1688.98 114.516   1
  16  17  -8 389.694 63.0816   1
  -8 -16 -17 308.393 59.6982   1
 -17  -8 -16 331.015 54.8706   1
 -17  -8 -15 108.485 43.4042   1
  15  17  -8 161.846 53.0432   1
  -8 -15 -17 108.464 48.5883   1
  -8 -14 -17 2700.63 133.878   1
 -17  -8 -14 2811.12 125.490   1
  14  17  -8 2700.64 133.613   1
 -17  -8 -13 35.1897 37.5841   1
  13  17  -8 16.0947 48.9375   1
  -8 -13 -17-5.32153 46.4355   1
  -8 -12 -17 4292.26 170.468   1
  12  17  -8 4033.85 166.606   1
  11  17  -8 203.737 52.3707   1
  -8 -11 -17 103.085 40.4527   1
  10  17  -8 937.302 73.0879   1
  -8 -10 -17 947.227 73.5525   1
 -10 -17  -8 1006.39 79.2779   1
   9  17  -8 1000.41 73.1359   1
  -8  -9 -17 1019.59 73.4373   1
  17  -8   9 971.999 36.0531   1
  -9 -17  -8 916.599 76.8042   1
   8  17  -8 1918.12 100.616   1
  -8  -8 -17 2091.40 101.620   1
  -8 -17  -8 1798.93 104.208   1
  17  -8   8 1902.36 63.6277   1
  17  -8   7 5112.23 143.490   1
  -8  -7 -17 5276.96 179.855   1
  -7 -17  -8 5417.33 194.705   1
   7  17  -8 5430.43 184.068   1
   6  17  -8 3115.79 124.309   1
  -8  -6 -17 3018.00 122.923   1
  17  -8   6 2861.78 94.0925   1
  -6 -17  -8 2770.62 132.826   1
  -8  -5 -17 292.542 40.8136   1
   5  17  -8 318.821 42.5926   1
  -5 -17  -8 217.887 45.8082   1
   4  17  -8 1751.45 87.5040   1
  -8  -4 -17 1763.64 86.4356   1
  -4 -17  -8 1839.45 102.262   1
  -8  -3 -17 111.124 34.4306   1
   3  17  -8 158.664 34.4708   1
  -3 -17  -8 206.599 42.0619   1
  -2 -17  -8 11341.7 332.104   1
   2  17  -8 11791.0 312.813   1
  17   8  -2 11385.1 332.495   1
  -8  -2 -17 11139.5 306.328   1
   1  17  -8 2943.04 110.196   1
  -1 -17  -8 2998.41 128.532   1
  -8  -1 -17 2825.04 106.012   1
   0  17  -8 11.5719 25.3733   1
  -8   0 -17-13.2651 21.6706   1
  17   8   0-4.72526 34.7749   1
   0 -17  -8-18.5800 35.4011   1
  -8   1 -17 2657.98 97.0045   1
   1 -17  -8 2636.53 120.885   1
  17   8   1 2739.02 124.886   1
  -1  17  -8 2653.88 100.491   1
  17   8   2 11179.2 332.615   1
   2 -17  -8 11583.6 331.818   1
  -2  17  -8 11661.5 300.391   1
  -8   2 -17 11438.7 295.495   1
  -8   3 -17 166.831 25.3347   1
   3 -17  -8 123.419 40.3612   1
  17   8   3 179.780 44.1032   1
  -3  17  -8 157.484 26.3829   1
  -4  17  -8 1977.61 72.5511   1
   4 -17  -8 1837.97 97.3894   1
  17   8   4 1774.39 98.7016   1
  -8   4 -17 1790.90 68.9804   1
  -8   5 -17 323.881 27.9630   1
   5 -17  -8 317.330 47.9603   1
  17   8   5 227.187 47.5903   1
   6 -17  -8 2812.73 124.201   1
  -8   6 -17 3013.36 91.0560   1
  17   8   6 2998.19 133.522   1
  -8   7 -17 5459.96 143.796   1
   7 -17  -8 5420.63 187.108   1
  17   8   7 5557.40 195.863   1
   7  17   8 5309.91 197.768   1
  17   8   8 1787.65 102.347   1
  -8   8 -17 1942.30 60.1017   1
   8  17   8 1868.46 106.291   1
   8 -17  -8 1882.25 97.6484   1
  -8   9 -17 986.837 34.5666   1
  17   8   9 1077.12 79.6220   1
  10  17   8 1317.89 90.9476   1
  17   8  10 995.132 77.9876   1
  11  17   8 141.899 48.8355   1
  17   8  11 110.716 47.6878   1
  17   8  12 4427.30 170.350   1
  12  17   8 4091.17 175.145   1
  17   8  13 50.6099 46.1712   1
  13  17   8 23.9795 47.8081   1
  14  17   8 2764.06 142.181   1
  17   8  14 2713.21 132.030   1
  15  17   8 191.458 56.7021   1
  16  17   8 295.873 65.4600   1
 -17  -9 -16 1049.38 79.8338   1
  16  17  -9 1114.93 89.5998   1
  -9 -16 -17 949.560 87.4403   1
  -9 -15 -17 191.358 54.8664   1
 -17  -9 -15 194.683 48.2556   1
 -15 -17  -9 189.421 53.9977   1
  -9 -14 -17 2096.58 119.282   1
 -17  -9 -14 2090.96 109.506   1
  14  17  -9 2195.71 119.112   1
  -9 -13 -17 2359.06 122.314   1
 -17  -9 -13 2276.94 113.940   1
  13  17  -9 2447.01 127.805   1
  -9 -12 -17 646.593 70.4641   1
  12  17  -9 592.023 69.3190   1
  11  17  -9 2372.45 118.638   1
  -9 -11 -17 2238.76 115.937   1
  10  17  -9 314.298 51.1557   1
  -9 -10 -17 232.261 45.8174   1
   9  17  -9 205.622 43.1608   1
  -9  -9 -17 118.162 38.5517   1
  -9 -17  -9 127.947 44.6810   1
  17  -9   8 2303.53 67.8560   1
  -9  -8 -17 2541.51 113.441   1
   8  17  -9 2289.97 110.677   1
  -8 -17  -9 2141.05 115.945   1
   7  17  -9-16.7803 37.1667   1
  -9  -7 -17-4.12536 32.8941   1
  17  -9   7 14.8590 15.4195   1
  -7 -17  -9-10.3390 38.5913   1
  17  -9   6 2353.02 80.2784   1
   6  17  -9 2516.34 108.857   1
  -6 -17  -9 2547.59 123.469   1
  -9  -6 -17 2383.68 107.508   1
  -9  -5 -17 738.740 58.9572   1
   5  17  -9 886.209 62.3435   1
  -5 -17  -9 830.950 73.3957   1
  -9  -4 -17 10.5620 31.0358   1
   4  17  -9-7.18956 33.7056   1
  -4 -17  -9 29.9755 35.6855   1
  -9  -3 -17 3414.17 126.344   1
  -3 -17  -9 3461.63 143.464   1
  17   9  -3 3295.39 141.863   1
   3  17  -9 3212.92 125.296   1
  17   9  -2 378.107 53.1399   1
  -9  -2 -17 434.203 43.5783   1
  -2 -17  -9 385.891 53.7470   1
   2  17  -9 388.735 44.1508   1
   1  17  -9 45.8434 28.9289   1
  17   9  -1 34.2772 35.5258   1
  -1 -17  -9 4.83316 33.1843   1
  -9  -1 -17 89.6744 29.2393   1
  -9   0 -17-16.1327 25.3230   1
  17   9   0-9.72303 36.8001   1
   0  17  -9-5.71641 23.3466   1
   0 -17  -9 14.2345 36.1619   1
  17   9   1 29.3242 36.4868   1
  -1  17  -9 15.9761 25.0791   1
   1 -17  -9 4.69039 36.2282   1
  -9   1 -17 14.8841 23.0531   1
   2 -17  -9 276.477 50.4296   1
  -9   2 -17 401.901 35.9810   1
  17   9   2 419.930 56.7502   1
  -2  17  -9 437.805 39.6786   1
   3 -17  -9 3442.22 141.895   1
  17   9   3 3338.56 145.188   1
  -9   3 -17 3466.75 110.779   1
  -3  17  -9 3509.17 113.214   1
  -4  17  -9-13.4825 20.8298   1
   4 -17  -9-4.51947 34.4443   1
  -9   4 -17 9.20148 18.0089   1
  17   9   4-24.7876 38.7905   1
  -9   5 -17 825.049 41.6695   1
   5 -17  -9 673.139 61.6727   1
  17   9   5 830.306 70.2945   1
  -9   6 -17 2328.14 75.3969   1
   6 -17  -9 2240.11 110.094   1
   7 -17  -9-9.02919 33.2253   1
  17   9   7 5.13050 39.8866   1
  -9   7 -17-15.0671 14.9572   1
   8  17   9 2183.95 115.931   1
  -9   8 -17 2227.97 63.0526   1
   9  17   9 130.678 43.7692   1
  17   9   9 115.237 45.0768   1
  10  17   9 317.939 54.6294   1
  17   9  10 184.468 48.6050   1
  11  17   9 2428.12 127.584   1
  17   9  11 2513.56 127.058   1
  12  17   9 755.729 78.0413   1
  17   9  12 700.028 74.7658   1
  17   9  13 2396.11 126.142   1
  13  17   9 2526.10 134.347   1
  17   9  14 2103.93 120.446   1
  14  17   9 2325.76 128.054   1
  15  17   9 249.448 60.2278   1
  16  17   9 1117.87 93.6314   1
 -16 -17 -10 187.978 53.6482   1
 -17 -10 -16 191.090 50.4148   1
  16  17 -10 158.701 49.4784   1
 -10 -16 -17 312.926 59.7828   1
 -15 -17 -10 974.266 86.2787   1
  15  17 -10 987.832 85.4472   1
 -10 -15 -17 1038.98 87.0445   1
 -17 -10 -15 973.827 78.6534   1
 -17 -10 -14 989.230 80.2812   1
  14  17 -10 1071.03 85.6005   1
 -14 -17 -10 932.417 84.6555   1
 -10 -14 -17 1008.20 84.9661   1
 -10 -13 -17 37.7523 45.5808   1
  13  17 -10-5.44898 51.3180   1
 -17 -10 -13-4.83869 44.9614   1
 -10 -12 -17 9577.38 298.119   1
  12  17 -10 9373.42 297.129   1
 -17 -10 -12 9701.86 291.804   1
 -10 -11 -17 670.849 68.0031   1
  11  17 -10 406.810 63.2440   1
 -10 -10 -17 2309.64 113.693   1
  10  17 -10 2183.74 111.286   1
 -10  -9 -17 732.927 65.1885   1
   9  17 -10 860.864 68.4900   1
   8  17 -10 192.158 42.5033   1
  -8 -17 -10 106.912 41.4091   1
 -10  -8 -17 130.367 41.5867   1
  17 -10   7 209.834 19.5083   1
   7  17 -10 204.811 39.2825   1
  -7 -17 -10 265.444 49.0933   1
 -10  -7 -17 149.098 38.9284   1
   6  17 -10 251.951 41.8747   1
  -6 -17 -10 204.250 48.6590   1
 -10  -6 -17 169.176 37.8209   1
  -5 -17 -10 3369.99 147.548   1
   5  17 -10 3543.90 135.112   1
 -10  -5 -17 3514.97 132.631   1
 -10  -4 -17 1833.01 90.5112   1
  17  10  -4 1857.45 105.640   1
   4  17 -10 1867.26 90.8575   1
  -4 -17 -10 1830.32 103.314   1
 -10  -3 -17 3005.51 116.107   1
  17  10  -3 3060.55 138.147   1
   3  17 -10 2981.21 118.872   1
  -3 -17 -10 3067.35 136.363   1
  -2 -17 -10 4503.04 172.863   1
   2  17 -10 4425.24 150.067   1
  17  10  -2 4173.24 168.978   1
 -10  -2 -17 4573.05 149.255   1
 -10  -1 -17 637.789 48.6042   1
  -1 -17 -10 661.857 64.8639   1
   1  17 -10 619.142 48.6520   1
  17  10  -1 675.831 65.5611   1
   0 -17 -10-39.0274 38.9006   1
  17  10   0 10.0814 38.4185   1
 -10   0 -17-18.7797 25.6025   1
   1 -17 -10 591.308 61.2856   1
  17  10   1 581.087 64.8881   1
 -10   1 -17 624.850 44.5799   1
  -1  17 -10 604.453 44.6482   1
   2 -17 -10 4472.07 171.068   1
 -10   2 -17 4573.25 138.405   1
  -2  17 -10 4467.64 140.909   1
  17  10   2 4706.24 177.867   1
 -10   3 -17 3153.07 102.996   1
  -3  17 -10 3149.45 105.571   1
  17  10   3 3197.78 142.163   1
   3 -17 -10 3165.95 137.323   1
 -10   4 -17 1959.70 70.6523   1
   4 -17 -10 1816.40 101.145   1
  -4  17 -10 1860.24 71.1685   1
  17  10   4 1969.86 110.322   1
  -5  17 -10 3465.56 103.778   1
 -10   5 -17 3412.52 101.949   1
   5 -17 -10 3632.78 145.272   1
  17  10   5 3230.40 147.445   1
   6 -17 -10 171.688 44.9199   1
  17  10   6 153.484 49.1941   1
 -10   6 -17 238.920 21.2469   1
   7 -17 -10 107.876 41.9541   1
 -10   7 -17 191.636 16.2183   1
  17  10   7 171.362 45.4364   1
  17  10   8 272.023 50.9152   1
   9  17  10 860.996 76.4493   1
  17  10   9 988.074 79.7719   1
  10  17  10 2085.97 117.836   1
  17  10  10 2190.02 118.178   1
  17  10  11 456.542 65.8223   1
  11  17  10 706.201 74.3854   1
  17  10  12 9790.93 308.410   1
  12  17  10 9949.76 315.099   1
  13  17  10-6.13201 44.1361   1
  17  10  13-16.5424 50.2975   1
  14  17  10 1008.47 89.0829   1
  17  10  14 845.982 81.9648   1
  15  17  10 1087.73 91.2177   1
  16  17  10 285.771 63.1879   1
 -16 -17 -11 544.743 71.2118   1
 -17 -11 -16 603.843 67.3192   1
  16  17 -11 492.290 65.0569   1
 -11 -16 -17 643.450 71.6083   1
 -11 -15 -17 245.198 55.2490   1
  15  17 -11 314.326 58.7608   1
 -15 -17 -11 212.045 56.3007   1
 -17 -11 -15 212.894 52.1268   1
 -17 -11 -14 812.937 73.2231   1
  14  17 -11 861.402 79.7048   1
 -11 -14 -17 756.826 78.3230   1
  13  17 -11 3217.03 150.541   1
 -17 -11 -13 3066.48 142.872   1
 -13 -17 -11 3412.21 153.854   1
 -11 -13 -17 3308.60 148.358   1
 -17 -11 -12-24.9844 43.8302   1
  12  17 -11-73.8724 56.6833   1
 -11 -12 -17 15.6707 42.9221   1
  11  17 -11 1932.43 109.478   1
 -11 -11 -17 1755.95 103.965   1
 -11 -10 -17 72.1693 39.6111   1
  10  17 -11 174.292 47.6386   1
 -11  -9 -17-23.0322 42.4126   1
   9  17 -11 4.63635 33.3711   1
 -11  -8 -17 8.79314 39.3393   1
   8  17 -11-4.41950 36.9386   1
 -11  -7 -17 1233.66 79.0597   1
  17 -11   7 1232.12 42.4360   1
   7  17 -11 1166.12 77.0632   1
  -7 -17 -11 1373.17 91.7706   1
  -6 -17 -11 117.620 44.4968   1
 -11  -6 -17 111.309 35.4742   1
   6  17 -11 91.6965 38.2791   1
 -11  -5 -17 4201.03 152.832   1
  17  11  -5 4162.10 169.654   1
   5  17 -11 4273.56 153.140   1
  -5 -17 -11 4360.06 171.423   1
 -11  -4 -17-10.6566 36.2942   1
  17  11  -4 63.1819 44.7423   1
   4  17 -11-39.7604 38.4285   1
  -4 -17 -11 10.4681 41.4761   1
 -11  -3 -17 2178.99 95.6476   1
  -3 -17 -11 2105.32 112.060   1
   3  17 -11 2219.88 97.7223   1
  17  11  -3 2007.81 112.252   1
 -11  -2 -17 31.2065 25.6411   1
  17  11  -2-5.23039 39.5931   1
   2  17 -11 3.19421 27.2926   1
  -2 -17 -11 20.5238 37.2102   1
 -11  -1 -17 2.89427 25.5140   1
  17  11  -1 5.20132 41.7288   1
  -1 -17 -11-20.2040 37.4406   1
   1  17 -11-15.0019 26.9784   1
 -11   0 -17-16.0412 25.0713   1
   0 -17 -11-9.99589 38.6047   1
   0  17 -11-19.7155 27.6778   1
  17  11   0-36.5631 44.6294   1
 -11   1 -17 2.43909 22.5619   1
  -1  17 -11-15.6219 27.0005   1
   1 -17 -11-19.6630 40.3887   1
  17  11   1-26.1615 42.7387   1
  -2  17 -11-16.6357 29.3263   1
  17  11   2-5.27163 41.2482   1
   2 -17 -11-4.84082 42.2394   1
 -11   2 -17 13.2189 20.8406   1
  -3  17 -11 2123.08 81.0666   1
 -11   3 -17 2220.59 79.8708   1
  17  11   3 2240.64 117.391   1
   3 -17 -11 2230.45 111.729   1
   4 -17 -11-9.59094 37.7627   1
  -4  17 -11 27.3430 20.9957   1
 -11   4 -17-3.33597 19.6614   1
  17  11   4 26.9371 45.2812   1
  17  11   5 4110.43 169.324   1
  -5  17 -11 4187.02 118.348   1
   5 -17 -11 4089.17 163.280   1
 -11   5 -17 4036.30 115.060   1
   6 -17 -11 53.0689 42.8015   1
  17  11   6 32.9414 52.6614   1
 -11   6 -17 118.403 16.5313   1
  17  11   7 1247.63 89.7469   1
  17  11   8-16.8881 45.9828   1
  17  11   9 5.63695 42.6697   1
  17  11  10 147.520 49.8712   1
  11  17  11 1935.94 116.094   1
  17  11  11 1851.80 112.644   1
  17  11  12-11.4215 52.8226   1
  12  17  11 12.1429 45.0041   1
  17  11  13 3296.26 153.005   1
  13  17  11 3234.70 154.763   1
  17  11  14 1076.87 86.3821   1
  14  17  11 1061.12 90.7607   1
  15  17  11 286.913 58.4106   1
  16  17  11 615.460 75.2875   1
  16  17 -12 277.597 60.1135   1
 -17 -12 -16 273.166 56.7055   1
 -12 -16 -17 254.008 58.6998   1
 -16 -17 -12 179.468 53.1503   1
  15  17 -12 1605.77 104.443   1
 -12 -15 -17 1300.14 97.6184   1
 -15 -17 -12 1497.68 103.766   1
 -17 -12 -15 1179.39 91.3179   1
  14  17 -12 154.654 51.1286   1
 -14 -17 -12 210.345 55.1957   1
 -17 -12 -14 122.635 51.6588   1
 -12 -14 -17 169.578 55.4331   1
  13  17 -12 2341.92 122.549   1
 -13 -17 -12 2345.39 126.994   1
 -17 -12 -13 2227.91 119.034   1
 -12 -13 -17 2162.56 120.710   1
 -12 -17 -12 1631.77 107.486   1
 -17 -12 -12 1630.65 102.578   1
 -12 -12 -17 1712.02 104.572   1
  12  17 -12 1750.10 106.689   1
  11  17 -12 381.896 59.2056   1
 -12 -11 -17 346.830 58.4592   1
 -12 -10 -17 1655.24 98.0424   1
  10  17 -12 1514.69 96.3619   1
   9  17 -12 541.959 59.7939   1
 -12  -9 -17 487.553 58.8679   1
   8  17 -12 48.9662 36.8075   1
 -12  -8 -17 66.4874 38.6974   1
  17 -12   7 4015.17 99.3766   1
   7  17 -12 4247.16 156.574   1
 -12  -7 -17 4484.99 157.210   1
  17 -12   7 3814.51 98.6286   1
   6  17 -12-20.1708 38.8246   1
  17  12  -6-10.9279 46.1784   1
  -6 -17 -12 27.3681 39.9891   1
 -12  -6 -17 12.0132 34.9410   1
  17  12  -5 7260.63 247.326   1
  -5 -17 -12 7128.46 247.475   1
 -12  -5 -17 7547.58 226.653   1
   5  17 -12 7393.46 227.622   1
   4  17 -12 21.6493 36.6039   1
  17  12  -4 38.0291 45.9271   1
  -4 -17 -12 16.0852 45.0776   1
 -12  -4 -17 107.165 35.8216   1
   3  17 -12 2869.93 114.200   1
  17  12  -3 2754.51 134.261   1
  -3 -17 -12 2746.66 132.947   1
 -12  -3 -17 2822.57 111.703   1
   2  17 -12-12.7859 29.8393   1
  17  12  -2-26.8268 45.0974   1
 -12  -2 -17-12.4731 28.4464   1
  -2 -17 -12-31.4746 44.5793   1
  -1 -17 -12 414.723 56.7905   1
  17  12  -1 454.488 60.5378   1
   1  17 -12 412.627 42.1952   1
 -12  -1 -17 532.436 45.3896   1
 -12   0 -17-7.93977 25.5874   1
  17  12   0-43.1359 44.3059   1
   0  17 -12-33.4152 29.1983   1
   0 -17 -12-56.2470 41.2778   1
   1 -17 -12 507.047 59.8282   1
 -12   1 -17 566.325 40.9704   1
  17  12   1 520.013 62.1955   1
  -1  17 -12 493.463 42.0319   1
  -2  17 -12-37.5448 27.3474   1
 -12   2 -17-2.14899 22.8508   1
  17  12   2-16.4045 43.8714   1
   3 -17 -12 2758.60 128.473   1
  -3  17 -12 2633.41 94.3354   1
 -12   3 -17 2861.07 92.8063   1
  17  12   3 2697.93 133.413   1
  17  12   4 27.9999 45.4969   1
  -4  17 -12 68.8214 23.7398   1
   4 -17 -12 69.2797 44.3045   1
 -12   4 -17 76.5742 21.3021   1
 -12   5 -17 7058.73 183.537   1
  17  12   5 7411.15 250.615   1
  -5  17 -12 7108.91 186.721   1
  17  12   6-11.4096 49.2666   1
   6 -17 -12-44.9177 50.9973   1
  17  12   7 4329.67 178.538   1
  17  12   8-11.6645 53.4496   1
  17  12   9 369.132 59.9814   1
  17  12  10 2022.53 117.974   1
  17  12  11 351.141 63.1370   1
  17  12  12 1644.45 108.033   1
  13  17  12 2438.75 134.568   1
  17  12  13 2391.01 129.593   1
  17  12  14 54.1684 49.1946   1
  14  17  12 116.249 56.6711   1
  15  17  12 1440.85 105.255   1
 -17 -13 -16 79.5221 51.3273   1
 -13 -16 -17 18.3149 48.6860   1
 -16 -17 -13 25.0584 47.7518   1
 -17 -13 -15 517.465 70.3880   1
  15  17 -13 674.396 74.9032   1
 -15 -17 -13 611.144 72.4003   1
 -13 -15 -17 659.651 73.3982   1
 -14 -17 -13 102.450 50.4215   1
 -17 -13 -14 160.812 56.4903   1
  14  17 -13 149.502 55.3856   1
 -13 -14 -17 34.1282 47.3285   1
  13  17 -13 315.228 60.4947   1
 -13 -13 -17 268.490 60.3347   1
 -17 -13 -13 229.724 57.8416   1
 -13 -17 -13 245.766 60.8367   1
 -17 -13 -12 933.311 82.7777   1
  12  17 -13 935.794 80.2602   1
 -12 -17 -13 1031.70 87.9446   1
 -13 -12 -17 918.464 81.3494   1
 -13 -11 -17 728.696 72.8369   1
  11  17 -13 670.192 70.3209   1
 -11 -17 -13 594.926 73.4862   1
  10  17 -13 137.286 48.0635   1
 -13 -10 -17 116.452 48.5276   1
   9  17 -13 887.264 73.6849   1
 -13  -9 -17 1053.61 76.5437   1
   8  17 -13 71.9650 41.0689   1
 -13  -8 -17 93.1288 37.5260   1
   7  17 -13 853.195 69.9127   1
 -13  -7 -17 810.580 65.6962   1
  17 -13   6 17.5429 14.9879   1
   6  17 -13 8.14015 44.4573   1
 -13  -6 -17 4.00723 35.6802   1
  17  13  -6-33.7471 49.3306   1
  17  13  -5 3534.18 158.987   1
 -13  -5 -17 3964.20 143.467   1
   5  17 -13 3581.50 140.761   1
  -5 -17 -13 3704.77 160.175   1
 -13  -4 -17 642.187 56.6951   1
   4  17 -13 689.048 59.1570   1
  17  13  -4 763.962 76.9030   1
  -4 -17 -13 636.299 70.6949   1
   3  17 -13 20.5233 33.3358   1
  -3 -17 -13-10.8837 43.9243   1
 -13  -3 -17 30.0478 28.5259   1
  17  13  -3-22.1368 49.0310   1
  17  13  -2 189.554 51.0349   1
  -2 -17 -13 182.107 49.0443   1
   2  17 -13 174.335 37.4309   1
 -13  -2 -17 217.784 36.3000   1
   1  17 -13 1918.12 84.5489   1
  17  13  -1 1862.30 108.524   1
 -13  -1 -17 1700.14 80.4139   1
  -1 -17 -13 1746.21 103.825   1
   0 -17 -13-15.7206 40.4732   1
 -13   0 -17 2.63709 25.8059   1
   0  17 -13-13.9265 27.3677   1
  17  13   0 22.3016 45.5406   1
 -13   1 -17 1780.35 75.1690   1
   1 -17 -13 1906.72 106.632   1
  17  13   1 1736.45 107.359   1
  -1  17 -13 1844.72 78.8906   1
  -2  17 -13 205.793 31.2475   1
 -13   2 -17 165.751 26.4375   1
   2 -17 -13 164.660 47.0939   1
  17  13   2 130.759 46.0493   1
  17  13   3-28.7113 53.3584   1
 -13   3 -17 38.9903 20.1501   1
   3 -17 -13 35.7581 38.6698   1
  -3  17 -13 2.08215 25.4303   1
  17  13   4 766.634 80.3615   1
  -4  17 -13 817.531 44.4986   1
   4 -17 -13 936.507 77.4255   1
 -13   4 -17 827.454 41.9961   1
   5 -17 -13 4026.90 163.071   1
  17  13   5 3918.05 169.582   1
   6 -17 -13 20.6785 43.4545   1
  17  13   6 35.6296 47.6447   1
  17  13   7 836.082 80.6842   1
  17  13   8 42.2039 46.8813   1
  17  13   9 861.789 82.5601   1
  17  13  10 121.017 51.7679   1
  17  13  11 811.661 85.2517   1
  17  13  12 887.098 84.8944   1
  17  13  13 362.683 67.6295   1
  17  13  14 99.7959 52.7609   1
  15  17  13 651.886 78.3040   1
 -17 -14 -16 812.919 79.4597   1
 -16 -17 -14 828.339 82.0245   1
 -14 -16 -17 671.016 79.5802   1
 -14 -15 -17 980.901 86.3411   1
  15  17 -14 988.652 86.6690   1
 -17 -14 -15 834.690 82.4639   1
 -15 -17 -14 840.654 80.9750   1
  14  17 -14 354.431 59.5859   1
 -14 -14 -17 235.183 56.1411   1
 -17 -14 -14 334.075 62.9186   1
 -14 -17 -14 397.626 62.9222   1
  13  17 -14 3486.53 155.902   1
 -14 -13 -17 3780.78 161.785   1
 -13 -17 -14 3807.11 166.781   1
 -17 -14 -12 839.460 80.6253   1
 -12 -17 -14 663.810 76.7006   1
  12  17 -14 789.285 77.4541   1
 -14 -12 -17 803.186 74.8624   1
  11  17 -14 46.4146 48.7996   1
 -11 -17 -14 65.0862 51.3772   1
 -14 -11 -17 56.2087 47.9267   1
 -14 -10 -17 142.074 48.8347   1
 -10 -17 -14 246.513 58.0005   1
  10  17 -14 93.8701 46.6485   1
   9  17 -14 28.3054 44.4299   1
 -14  -9 -17-4.68553 40.4613   1
   8  17 -14 989.314 75.5221   1
 -14  -8 -17 916.517 72.1354   1
   7  17 -14 2307.70 112.623   1
 -14  -7 -17 2322.94 109.932   1
  17 -14   6-3.14771 15.3029   1
 -14  -6 -17 4.03625 32.9686   1
   6  17 -14-12.3477 44.3618   1
  17  14  -5 4196.08 177.704   1
 -14  -5 -17 4222.77 155.056   1
   5  17 -14 4480.01 159.297   1
  17 -14   5 4416.52 123.363   1
  17  14  -4 422.066 64.3314   1
   4  17 -14 420.008 49.1114   1
 -14  -4 -17 466.704 48.3171   1
   3  17 -14 2228.33 98.7451   1
  17  14  -3 2200.02 122.689   1
 -14  -3 -17 2218.65 97.1899   1
  -3 -17 -14 2140.87 119.711   1
 -14  -2 -17 264.388 39.0547   1
   2  17 -14 219.692 39.0361   1
  -2 -17 -14 175.566 49.3402   1
  17  14  -2 200.260 55.2877   1
  -1 -17 -14 2020.10 112.455   1
 -14  -1 -17 1966.26 85.8458   1
  17  14  -1 1924.05 113.371   1
   1  17 -14 2008.26 88.1605   1
 -14   0 -17 7.91044 27.0424   1
   0 -17 -14-26.7458 39.9326   1
   0  17 -14 16.7909 28.3774   1
  17  14   0 5.76227 43.9160   1
 -14   1 -17 1991.28 81.1659   1
  -1  17 -14 2000.11 83.6205   1
   1 -17 -14 1917.28 110.295   1
  17  14   1 2052.34 116.128   1
 -14   2 -17 219.394 29.5380   1
  -2  17 -14 303.955 34.6294   1
  17  14   2 312.761 59.8783   1
   2 -17 -14 211.428 48.3183   1
  -3  17 -14 2209.10 82.4665   1
   3 -17 -14 2188.42 116.696   1
  17  14   3 2296.45 124.986   1
  -4  17 -14 396.976 32.8225   1
   4 -17 -14 420.419 58.2714   1
  17  14   4 378.076 62.8622   1
  17  14   5 4591.00 186.815   1
   5 -17 -14 4257.50 172.363   1
  17  14   6 6.12922 45.7560   1
  17  14   7 2407.49 131.004   1
  17  14   8 1005.73 88.4526   1
  17  14   9 6.26109 48.6753   1
  17  14  10 174.722 56.5137   1
  17  14  11 62.6987 52.4228   1
  17  14  12 626.167 76.4656   1
  17  14  13 3625.29 168.460   1
  17  14  14 323.818 64.5553   1
 -15 -16 -17 509.659 70.9883   1
 -17 -15 -16 640.585 76.3227   1
 -16 -17 -15 548.448 73.0000   1
 -15 -15 -17 54.2136 50.3580   1
 -15 -17 -15 56.3682 46.1044   1
 -17 -15 -15 30.2344 49.9805   1
 -14 -17 -15 80.8940 49.9265   1
 -15 -14 -17 17.4662 47.5600   1
 -17 -15 -14-23.8748 57.2024   1
  14  17 -15 46.8583 46.1284   1
 -17 -15 -13 129.585 53.0759   1
 -13 -17 -15 227.066 60.1545   1
 -15 -13 -17 196.483 57.2476   1
  13  17 -15 101.427 49.0369   1
 -15 -12 -17 842.966 78.5231   1
 -12 -17 -15 874.888 83.2968   1
 -17 -15 -12 865.261 81.1644   1
  12  17 -15 969.490 84.0692   1
 -15 -11 -17 1333.35 93.1040   1
  17  15 -11 1435.14 100.919   1
 -11 -17 -15 1478.52 104.985   1
  11  17 -15 1565.58 100.224   1
  10  17 -15-29.9319 48.2146   1
 -15 -10 -17-4.97371 43.8453   1
  17  15 -10 18.1067 47.8283   1
 -10 -17 -15-35.7979 48.4471   1
  -9 -17 -15 2211.66 126.243   1
 -15  -9 -17 2046.29 109.614   1
  17  15  -9 2389.43 127.560   1
   9  17 -15 2173.13 112.985   1
 -15  -8 -17 1358.06 86.3078   1
   8  17 -15 1227.06 82.4858   1
 -15  -7 -17 30.2304 34.0114   1
   7  17 -15 17.3954 38.1453   1
  17 -15   6 1771.10 56.9865   1
 -15  -6 -17 1849.67 94.0181   1
   6  17 -15 1779.86 96.0327   1
   5  17 -15-19.6806 39.9181   1
 -15  -5 -17 46.2815 34.8518   1
  17 -15   5 38.6171 17.8020   1
  17 -15   4 444.390 35.4975   1
 -15  -4 -17 441.582 48.7459   1
  17  15  -4 561.433 68.4982   1
   4  17 -15 555.003 53.2584   1
 -15  -3 -17 67.8514 31.1214   1
   3  17 -15 77.0375 35.3992   1
  17  15  -3 82.4707 51.6834   1
  -3 -17 -15 11.3726 45.0806   1
  17  15  -2 1703.70 108.038   1
 -15  -2 -17 1709.42 81.0598   1
  -2 -17 -15 1408.58 98.9518   1
   2  17 -15 1697.12 82.2574   1
  -1 -17 -15 890.287 80.3954   1
  17  15  -1 854.106 82.2393   1
 -15  -1 -17 917.506 58.0779   1
   1  17 -15 942.404 60.2739   1
 -15   0 -17-5.35686 25.8865   1
   0  17 -15-14.0499 27.2717   1
  17  15   0 11.9381 46.1025   1
   0 -17 -15-5.47295 46.5082   1
  -1  17 -15 719.625 51.1848   1
 -15   1 -17 873.223 51.3230   1
   1 -17 -15 986.068 80.0048   1
  17  15   1 865.254 79.8659   1
  -2  17 -15 1557.47 71.8829   1
  17  15   2 1816.37 113.001   1
   2 -17 -15 1868.10 106.970   1
  -3  17 -15 30.9614 25.6162   1
  17  15   3 18.5397 44.4884   1
   3 -17 -15 81.1902 43.9589   1
  17  15   4 395.944 63.0080   1
  -4  17 -15 448.901 33.4709   1
   4 -17 -15 428.960 59.9085   1
  17  15   5 18.8538 51.3407   1
   5 -17 -15 60.1369 44.9254   1
  17  15   6 1666.50 113.615   1
  17  15   7 44.6348 47.2751   1
  17  15   8 1386.36 102.125   1
  17  15   9 2214.93 128.312   1
  17  15  10-19.2503 53.3314   1
  17  15  11 1432.81 106.213   1
  17  15  12 906.536 86.9090   1
  17  15  13 216.930 65.2931   1
  17  15  14 6.68771 55.5818   1
 -16 -17 -16 456.329 72.1063   1
 -17 -16 -16 586.705 73.8446   1
 -16 -15 -17 48.4506 49.4779   1
 -15 -17 -16 12.6514 54.0540   1
 -17 -16 -15 75.0795 52.0075   1
 -17 -16 -14 444.889 69.1726   1
 -14 -17 -16 650.235 73.6550   1
 -16 -14 -17 676.181 73.2838   1
 -16 -13 -17 16.8617 49.5588   1
 -13 -17 -16 86.9635 47.6730   1
 -17 -16 -13 54.8919 47.7360   1
 -16 -12 -17 828.229 78.2795   1
 -17 -16 -12 756.844 79.6585   1
 -12 -17 -16 868.723 83.1641   1
 -16 -11 -17 842.700 77.7754   1
  17  16 -11 787.869 80.2911   1
 -11 -17 -16 752.852 79.4556   1
 -16 -10 -17 857.301 75.9254   1
 -10 -17 -16 744.351 81.0989   1
  -9 -17 -16 103.019 50.6774   1
  17  16  -9 55.4465 49.1520   1
 -16  -9 -17 71.5228 40.7734   1
  17  16  -8 275.729 61.8188   1
 -16  -8 -17 342.424 57.2086   1
  -8 -17 -16 361.629 62.8958   1
   8  17 -16 290.348 52.4441   1
 -16  -7 -17 945.263 72.8687   1
   7  17 -16 967.332 74.3161   1
   6  17 -16 1146.36 77.2629   1
 -16  -6 -17 1279.89 79.5111   1
  17 -16   6 1135.78 42.2338   1
 -16  -5 -17 27.4117 33.1128   1
   5  17 -16 35.6546 35.6368   1
  17 -16   5 59.4366 20.3054   1
   4  17 -16 1427.85 78.6439   1
 -16  -4 -17 1357.32 76.7032   1
  17 -16   4 1220.16 56.8875   1
  17 -16   3 1656.77 71.8046   1
 -16  -3 -17 1912.05 88.0833   1
   3  17 -16 1741.39 87.2055   1
  -2 -17 -16 34.6421 42.8070   1
 -16  -2 -17 41.6697 30.4675   1
   2  17 -16 29.8761 32.0956   1
  17  16  -2 79.1549 51.4679   1
  17  16  -1 293.813 60.6153   1
 -16  -1 -17 344.980 41.9052   1
   1  17 -16 371.104 43.7041   1
  -1 -17 -16 307.447 57.5642   1
   0 -17 -16-22.4639 46.4085   1
  17  16   0 6.20284 46.6304   1
   0  17 -16 2.84485 26.6736   1
  17  16   1 367.944 61.6373   1
  -1  17 -16 422.270 41.0709   1
   1 -17 -16 336.232 57.9068   1
  17  16   2 18.8903 48.6398   1
  -2  17 -16 9.33097 26.3162   1
   2 -17 -16 128.435 44.8063   1
  17  16   3 1601.00 110.170   1
   3 -17 -16 1835.01 107.909   1
  -3  17 -16 1700.04 70.1233   1
  17  16   4 1491.00 105.914   1
  -4  17 -16 1349.17 56.4167   1
   4 -17 -16 1347.83 94.0093   1
  17  16   5 6.47101 48.9860   1
   5 -17 -16 39.4442 45.2101   1
  17  16   6 1144.15 96.5941   1
  -6  17 -16 1198.13 39.9742   1
  17  16   7 1048.06 92.7113   1
  17  16   8 304.547 64.0770   1
  17  16   9 151.768 52.0712   1
  17  16  10 958.278 90.1985   1
  17  16  11 774.590 83.3549   1
  17  16  12 819.636 85.1025   1
 -17 -17 -17 1208.75 102.712   1
 -16 -17 -17 1127.62 98.9208   1
 -17 -16 -17 1107.59 96.6136   1
 -17 -17 -16 1029.88 96.3957   1
 -17 -17 -15 381.131 68.1353   1
 -15 -17 -17 436.194 72.2829   1
 -17 -15 -17 455.541 66.3520   1
 -17 -17 -14 593.666 73.4779   1
 -17 -14 -17 517.284 69.7910   1
 -14 -17 -17 560.537 75.0412   1
 -17 -17 -13-12.6129 49.9741   1
 -17 -13 -17 17.2094 49.7962   1
 -13 -17 -17-25.2198 45.7231   1
 -17 -12 -17 5.52152 48.9435   1
 -17 -17 -12 100.245 49.3618   1
 -12 -17 -17 119.020 49.0399   1
 -17 -11 -17-5.30652 49.9768   1
 -11 -17 -17 37.3253 48.9875   1
 -17 -10 -17 15.2676 41.8141   1
 -10 -17 -17 6.22063 50.2104   1
  17  17 -10 18.9765 51.0568   1
  -9 -17 -17 148.288 54.7993   1
 -17  -9 -17 97.4086 44.2887   1
  17  17  -9 106.793 51.3746   1
  -8 -17 -17 1468.80 101.974   1
  17  17  -8 1136.95 95.5708   1
 -17  -8 -17 1298.49 87.0748   1
 -17  -7 -17 1723.39 96.1288   1
  17  17  -7 1741.58 112.814   1
  -7 -17 -17 1735.14 112.791   1
   6  17 -17 3575.46 140.704   1
  17 -17   6 3293.27 90.9192   1
 -17  -6 -17 3323.08 135.369   1
 -17  -5 -17 19.8142 33.6767   1
  17 -17   5 11.5729 19.5441   1
   5  17 -17 12.0430 34.8479   1
 -17  -4 -17 3.71436 32.2429   1
   4  17 -17 7.57884 35.3711   1
  17 -17   4-14.4803 24.9277   1
  17 -17   3-4.76976 26.5589   1
 -17  -3 -17 20.8699 31.8769   1
   3  17 -17 7.16446 34.4754   1
   2  17 -17 1759.81 87.9993   1
  17  17  -2 1888.92 115.119   1
  17 -17   2 1817.87 79.5647   1
   1  17 -17 1046.43 64.5022   1
  -1 -17 -17 1105.69 89.9936   1
  17  17  -1 1114.73 94.4484   1
   0 -17 -17-23.0280 48.3887   1
   0  17 -17-11.4411 25.4702   1
  17  17   0-31.9219 44.8970   1
   1 -17 -17 1186.79 91.2961   1
  -1  17 -17 1181.45 63.3702   1
  17  17   1 1318.16 99.7220   1
  17  17   2 1829.22 116.650   1
   2 -17 -17 1948.50 112.055   1
  -2  17 -17 1772.82 76.1159   1
   3 -17 -17 85.8355 45.9091   1
  17  17   3 19.5828 50.7475   1
  -3  17 -17-12.4004 27.5881   1
  -4  17 -17-8.78965 22.2450   1
   4 -17 -17-11.4949 44.6822   1
  17  17   4 46.2875 50.0541   1
  17  17   5-26.8048 54.4133   1
   5 -17 -17 34.8404 45.1430   1
  -6  17 -17 3326.38 87.3279   1
  17  17   6 3619.47 166.587   1
  17  17   7 1897.63 122.762   1
  17  17   8 1498.68 110.608   1
  17  17   9 67.7933 52.3826   1
  17  17  10 61.2381 50.0930   1
   0  18   0 904.624 62.7209   1
   0 -18   0 788.695 62.8208   1
  -1 -18   0 107.903 39.2784   1
   1 -18   0 34.1445 33.4559   1
   1  18   0-3.67018 35.0331   1
  -2 -18   0 3165.51 132.980   1
   2  18   0 3173.78 130.460   1
   2 -18   0 3417.09 131.772   1
   3  18   0 43.8804 42.7164   1
  -3 -18   0 21.0897 40.9490   1
  18   0   3 71.1531 36.7720   1
   3 -18   0 43.9334 37.5615   1
   4  18   0 3189.39 131.961   1
  18   0   4 3197.44 123.257   1
  -4 -18   0 3047.89 130.416   1
   4 -18   0 3165.20 123.248   1
   5  18   0 17.5514 32.2975   1
   5 -18   0 38.8319 30.6501   1
  18   0   5 24.1787 27.0339   1
  -5 -18   0 31.3759 33.7015   1
   6  18   0 2975.44 131.304   1
  -6 -18   0 3302.86 136.714   1
  18   0   6 3105.68 120.505   1
   6 -18   0 3219.98 122.238   1
   7  18   0 33.2667 40.3877   1
  18   0   7 20.5313 29.2401   1
   7 -18   0 17.1062 28.1131   1
  18   0   8 116.673 33.0884   1
   8 -18   0 175.480 34.4151   1
   9  18   0-5.09059 37.7355   1
  18   0   9-20.4745 33.8031   1
   9 -18   0-19.9832 31.3687   1
  18   0  10 795.249 60.3894   1
  10 -18   0 786.752 57.6537   1
  11 -18   0-19.4510 34.3465   1
  18   0  11-3.33194 36.2752   1
  12 -18   0 2529.30 104.412   1
  18   0  12 2562.36 105.582   1
  13 -18   0-25.6590 34.0997   1
  18   0  13 12.8123 32.9726   1
  14 -18   0 669.415 52.9866   1
  15 -18   0 16.0671 26.5570   1
  16  18   0 261.443 61.2380   1
   0  16 -18 320.616 38.2481   1
  16 -18   0 318.525 38.5013   1
   0  17 -18-5.82063 29.2898   1
  17 -18   0-19.8936 32.0484   1
  17  18   0-52.6758 57.1593   1
   0 -17 -18-53.1165 52.8105   1
   1  17 -18 2556.60 104.287   1
  17 -18   1 2539.03 101.113   1
  17  18  -1 2524.46 139.154   1
   1  16 -18 3096.16 116.936   1
  16 -18   1 3015.44 113.796   1
  15 -18   1 47.9846 27.5052   1
  14 -18   1 412.531 42.9555   1
  18  -1  13 6347.99 187.884   1
  13 -18   1 6082.88 188.277   1
  18  -1  12 323.243 42.4550   1
  12 -18   1 349.656 45.0521   1
  18  -1  11 11769.2 313.901   1
  11  18  -1 11098.9 344.766   1
  11 -18   1 11698.1 313.354   1
  -1 -11 -18 11899.4 340.120   1
  10  18  -1 1373.32 92.2499   1
  18  -1  10 1423.08 75.7662   1
  10 -18   1 1351.18 74.5949   1
  -1 -10 -18 1499.64 88.8483   1
  18  -1   9 809.988 57.5191   1
   9  18  -1 906.672 74.6318   1
   9 -18   1 893.916 59.7121   1
  18  -1   8 19.2517 28.8629   1
   8 -18   1 47.9034 29.0049   1
  -8 -18  -1 58.8147 35.8175   1
   8  18  -1 48.5020 37.4707   1
   7 -18   1 6372.54 192.469   1
   7  18  -1 6385.66 212.542   1
  -7 -18  -1 5806.23 208.597   1
  18  -1   7 6246.15 191.661   1
   6 -18   1 644.039 50.8741   1
  -6 -18  -1 598.784 60.9266   1
   6  18  -1 606.430 56.9668   1
  18  -1   6 619.313 50.1792   1
  18  -1   5 2656.45 107.117   1
   5 -18   1 2734.40 110.918   1
   5  18  -1 2862.93 124.615   1
  -5 -18  -1 2755.40 122.988   1
  -4 -18  -1 3256.37 134.062   1
  18  -1   4 3119.07 119.552   1
   4 -18   1 3035.57 119.926   1
   4  18  -1 3215.56 131.679   1
   3  18  -1 16337.0 435.649   1
  -3 -18  -1 16734.8 442.603   1
   3 -18   1 16278.6 426.955   1
  -2 -18  -1 8.37311 35.9659   1
   2  18  -1 41.3383 35.5536   1
   2 -18   1 28.6985 35.8213   1
   1 -18   1 11625.7 323.118   1
  -1 -18  -1 11463.1 329.117   1
   1  18  -1 12002.4 324.038   1
   0 -18   1 5356.28 184.721   1
   0  18  -1 5671.55 181.053   1
   0 -18  -1 5915.66 191.093   1
   1  18   1 11641.4 328.216   1
  -1 -18   1 11832.6 330.588   1
  -1  18  -1 11980.6 320.856   1
   1 -18  -1 11923.4 332.062   1
   2  18   1 19.5271 36.7880   1
  -2 -18   1 24.2063 35.2103   1
   2 -18  -1 58.0417 38.4880   1
   3 -18  -1 17074.3 449.943   1
  -3 -18   1 16909.7 454.940   1
   3  18   1 17876.6 457.167   1
  18   1   3 17097.1 448.458   1
  -4 -18   1 3115.84 131.069   1
   4  18   1 3086.71 129.061   1
  18   1   4 3194.33 125.402   1
   4 -18  -1 3189.93 126.515   1
  -5 -18   1 2689.86 120.367   1
   5  18   1 2639.63 119.528   1
  18   1   5 2702.27 111.770   1
   5 -18  -1 2655.74 111.612   1
   6 -18  -1 548.325 51.2454   1
  18   1   6 591.560 53.3921   1
   6  18   1 647.970 60.7231   1
   7 -18  -1 6061.61 196.010   1
  18   1   7 6356.25 198.224   1
   7  18   1 6319.55 214.207   1
  18   1   8 51.0870 32.6706   1
   8 -18  -1 45.6774 28.7222   1
   8  18   1 59.8087 38.5115   1
   9  18   1 786.060 72.0517   1
  18   1   9 956.386 64.0098   1
   9 -18  -1 874.898 59.3750   1
  10 -18  -1 1347.22 75.4650   1
  18   1  10 1421.86 78.7945   1
  11 -18  -1 11897.6 320.355   1
  18   1  11 11581.4 321.770   1
  12 -18  -1 338.689 46.6774   1
  18   1  12 429.097 50.4769   1
  13 -18  -1 6081.21 191.979   1
  18   1  13 6228.37 194.703   1
  14 -18  -1 545.257 50.1784   1
  -1  15 -18 33.2768 27.7870   1
  15 -18  -1 44.9645 27.4205   1
  15  18   1 18.6628 50.2185   1
  16  18   1 3014.37 149.954   1
   1 -16 -18 3183.32 146.459   1
  -1  16 -18 2946.73 107.981   1
  -1  17 -18 2599.70 99.2071   1
   1 -17 -18 2710.75 135.959   1
   2  17 -18 1089.67 67.9969   1
  17 -18   2 1061.67 61.1408   1
  16 -18   2 46.9602 29.4884   1
  15 -18   2 653.468 48.3388   1
  14 -18   2 409.934 42.4839   1
  -2 -13 -18 545.508 68.0701   1
  13 -18   2 588.092 47.4579   1
  18  -2  12 1655.55 75.7098   1
  -2 -12 -18 1742.36 100.200   1
  12 -18   2 1593.51 76.6815   1
  12  18  -2 1673.99 103.268   1
  -2 -11 -18 459.094 58.5980   1
  18  -2  11 555.662 46.1058   1
  11  18  -2 559.229 65.5117   1
  11 -18   2 467.806 44.5029   1
  10  18  -2 463.293 60.2234   1
  18  -2  10 308.232 38.9378   1
  10 -18   2 373.111 40.4653   1
  -2 -10 -18 442.987 54.0243   1
   9  18  -2 1323.68 87.4552   1
  18  -2   9 1223.58 67.8328   1
   9 -18   2 1467.87 70.9050   1
  -2  -9 -18 1311.65 82.6443   1
  -9 -18  -2 1350.84 87.6693   1
   8 -18   2 506.724 45.4600   1
   8  18  -2 481.984 56.5894   1
  -8 -18  -2 575.541 60.3580   1
  18  -2   8 596.450 46.1336   1
   7 -18   2 321.166 37.3291   1
  -7 -18  -2 330.382 49.8413   1
  18  -2   7 345.906 37.1187   1
   7  18  -2 364.235 50.0966   1
  18  -2   6 21.4848 25.9416   1
   6  18  -2-17.8117 38.0463   1
  -6 -18  -2 14.1813 32.7109   1
   6 -18   2 34.3579 26.2541   1
  18  -2   5 573.157 47.1811   1
  -5 -18  -2 507.712 56.5914   1
   5  18  -2 455.749 56.2523   1
   5 -18   2 503.830 44.0855   1
  -4 -18  -2 396.122 48.0899   1
  18  -2   4 335.008 39.3495   1
   4 -18   2 310.255 38.9779   1
   4  18  -2 291.070 46.3865   1
   3  18  -2 27.4422 34.5907   1
  -3 -18  -2 61.2687 35.5671   1
   3 -18   2 107.491 31.9493   1
   2  18  -2 137.576 39.0263   1
   2 -18   2 195.023 38.6029   1
  -2 -18  -2 183.971 43.2211   1
   1 -18   2 53.4898 34.3339   1
   1  18  -2 59.7696 33.1274   1
  -1 -18  -2 20.9796 36.2470   1
   0  18  -2 16.7799 30.3244   1
   0 -18  -2-33.0630 39.2681   1
   0 -18   2-40.7329 40.8465   1
   1 -18  -2 16.2427 36.1676   1
  -1 -18   2 30.7076 37.1091   1
   1  18   2 19.4689 35.8629   1
  -1  18  -2 105.629 33.8059   1
   2 -18  -2 187.872 41.7909   1
   2  18   2 119.814 38.1511   1
  -2 -18   2 134.495 38.9124   1
  -3 -18   2 97.8631 37.4084   1
   3  18   2 16.5644 31.8192   1
   3 -18  -2 86.1450 37.7233   1
  18   2   3 128.531 36.7215   1
   4  18   2 284.026 43.3757   1
  18   2   4 249.549 41.3873   1
   4 -18  -2 267.919 40.2631   1
   5 -18  -2 475.963 48.2471   1
   5  18   2 405.446 51.5630   1
   6  18   2 65.1883 38.0392   1
  18   2   6 15.3076 29.1738   1
   6 -18  -2 26.3884 30.2512   1
   7 -18  -2 356.328 44.3012   1
   7  18   2 359.848 52.2698   1
  18   2   7 324.472 44.3662   1
   8 -18  -2 515.862 49.6440   1
  18   2   8 451.141 49.6029   1
   8  18   2 526.691 59.1505   1
   9 -18  -2 1451.30 78.1260   1
  18   2   9 1281.42 77.8727   1
  10 -18  -2 439.825 48.2216   1
  18   2  10 493.830 52.2503   1
  18   2  11 492.632 51.7953   1
  11 -18  -2 463.678 49.1929   1
  12 -18  -2 1554.58 83.5420   1
  18   2  12 1630.13 86.8911   1
  13 -18  -2 678.383 56.6812   1
  18   2  13 649.602 58.5570   1
  18   2  14 626.635 56.0627   1
  14 -18  -2 599.324 54.5439   1
  14  18   2 556.107 72.2552   1
  -2  15 -18 791.011 49.4413   1
  15  18   2 647.812 79.4337   1
   2 -15 -18 776.651 73.6891   1
   2 -16 -18 153.398 51.8399   1
  -2  16 -18 39.5658 28.8981   1
  16  18   2 25.8854 55.0081   1
   2 -17 -18 1031.13 87.6841   1
  -2  17 -18 911.129 55.3347   1
   3  17 -18-3.61685 34.8088   1
  17 -18   3-9.95646 27.2779   1
  16 -18   3 4042.26 130.701   1
  15 -18   3 1704.85 75.2559   1
  -3 -14 -18 1367.13 96.1612   1
  14 -18   3 1599.01 71.9154   1
  13 -18   3 152.113 31.7971   1
  -3 -13 -18 190.857 46.5371   1
  13  18  -3 197.742 52.6357   1
  18  -3  12 2515.10 91.8826   1
  12 -18   3 2431.10 93.8276   1
  -3 -12 -18 2394.58 120.250   1
  12  18  -3 2528.53 128.002   1
  11 -18   3 4945.97 157.328   1
  11  18  -3 5292.14 195.170   1
  18  -3  11 5216.28 156.351   1
  -3 -11 -18 5374.59 188.937   1
  10 -18   3 1594.21 73.8436   1
  10  18  -3 1775.37 101.097   1
  -3 -10 -18 1483.01 89.7188   1
  18  -3  10 1598.62 73.1690   1
 -10 -18  -3 1643.48 98.9343   1
   9  18  -3 147.429 42.4889   1
  -3  -9 -18 152.875 41.3717   1
  18  -3   9 69.8389 26.3708   1
  -9 -18  -3 66.8567 38.7197   1
   9 -18   3 90.0424 25.8975   1
   8  18  -3-4.75498 39.2934   1
  -3  -8 -18-16.7833 33.8664   1
  -8 -18  -3-10.0649 35.9457   1
   8 -18   3 5.57890 23.1831   1
  18  -3   8 13.7778 23.4162   1
  -3  -7 -18 743.721 61.1105   1
   7  18  -3 817.850 66.8000   1
  -7 -18  -3 760.013 67.4079   1
   7 -18   3 724.579 49.6298   1
  18  -3   7 833.771 52.5520   1
   6  18  -3 861.467 69.3842   1
  18  -3   6 975.831 56.8400   1
  -6 -18  -3 1018.63 74.8207   1
   6 -18   3 1039.81 58.7608   1
  18  -3   5 142.485 29.4375   1
  -5 -18  -3 98.4890 35.6267   1
   5 -18   3 169.256 30.4421   1
   5  18  -3 105.487 39.6749   1
   4 -18   3 1872.48 84.4830   1
   4  18  -3 1793.30 94.7773   1
  -4 -18  -3 1828.51 97.7652   1
  -3 -18  -3 201.018 40.5691   1
   3 -18   3 164.545 31.5816   1
   3  18  -3 201.095 40.3130   1
  -2 -18  -3 513.500 55.1598   1
   2 -18   3 669.068 52.5180   1
   2  18  -3 641.288 55.2547   1
  -1 -18  -3 579.627 57.7768   1
   1 -18   3 510.413 49.2942   1
   1  18  -3 659.858 54.6547   1
   0 -18   3 5560.82 182.352   1
   0  18  -3 5667.13 177.664   1
   0 -18  -3 5403.18 189.534   1
  -1  18  -3 581.228 47.3464   1
   1 -18  -3 576.710 58.2963   1
  -1 -18   3 605.480 54.9760   1
  18   3   2 693.378 58.0635   1
   2  18   3 597.084 55.1957   1
  -2  18  -3 613.910 46.3168   1
   2 -18  -3 636.959 56.2805   1
   3 -18  -3 220.041 38.7383   1
   3  18   3 249.346 41.1852   1
  18   3   3 243.720 40.7400   1
   4  18   3 1663.05 93.3685   1
   4 -18  -3 1765.57 90.4738   1
  18   3   4 1941.86 93.5269   1
   5  18   3 108.995 36.3259   1
  18   3   5 112.369 33.8530   1
   5 -18  -3 162.027 33.3395   1
   6  18   3 913.549 70.9043   1
  18   3   6 865.613 64.7593   1
   6 -18  -3 1005.99 66.7035   1
   7 -18  -3 703.025 58.5273   1
   7  18   3 858.385 69.3655   1
  18   3   7 700.590 60.2858   1
  18   3   8-8.20202 33.5001   1
   8 -18  -3-26.3885 30.6132   1
   9 -18  -3 123.773 32.1477   1
  18   3   9 103.023 37.3205   1
  10 -18  -3 1540.12 81.8214   1
  18   3  10 1553.30 86.3974   1
  11 -18  -3 5343.21 177.401   1
  18   3  11 5371.13 182.876   1
  18   3  12 2521.24 113.768   1
  12 -18  -3 2691.34 112.107   1
  13 -18  -3 197.381 40.9212   1
  18   3  13 160.802 42.4344   1
  13  18   3 90.3225 49.0178   1
  -3  14 -18 1525.84 66.4447   1
  18   3  14 1647.94 88.9579   1
  14  18   3 1637.73 111.034   1
  -3  15 -18 1764.48 71.1877   1
  15  18   3 1637.94 113.925   1
   3 -15 -18 1665.98 104.867   1
   3 -16 -18 3922.49 170.218   1
  16  18   3 4123.03 181.098   1
  -3  16 -18 3985.04 123.883   1
  -3  17 -18-6.25487 26.0584   1
   3 -17 -18-17.6431 45.4229   1
  17  18   3-6.74348 48.9032   1
   4  17 -18 2386.02 107.925   1
  17 -18   4 2298.89 86.1005   1
  16 -18   4 19.6823 23.8126   1
  15 -18   4 915.209 51.5725   1
  -4 -15 -18 923.060 82.5503   1
  -4 -14 -18 547.647 65.7340   1
  14 -18   4 507.133 39.4328   1
  14  18  -4 492.080 68.8058   1
  13 -18   4 502.270 38.4717   1
  -4 -13 -18 377.274 57.8531   1
  13  18  -4 542.661 66.0624   1
  18  -4  12 452.153 36.0380   1
  -4 -12 -18 544.128 62.4254   1
  12  18  -4 561.513 65.4689   1
  12 -18   4 505.785 39.6195   1
  11 -18   4 141.333 27.6387   1
  -4 -11 -18 76.6246 38.2656   1
 -11 -18  -4 119.299 48.8205   1
  18  -4  11 98.3992 24.9050   1
  11  18  -4 109.297 46.1768   1
 -10 -18  -4 1668.68 103.383   1
  18  -4  10 1676.20 72.2584   1
  -4 -10 -18 1687.72 95.1728   1
  10 -18   4 1708.29 72.8688   1
  10  18  -4 1713.66 101.031   1
  18  -4   9 527.406 41.1694   1
   9 -18   4 604.416 43.9110   1
   9  18  -4 545.560 61.6543   1
  -4  -9 -18 545.717 56.8952   1
  -9 -18  -4 510.543 60.5468   1
  -8 -18  -4 2982.65 135.736   1
   8 -18   4 3209.09 109.516   1
  18  -4   8 3036.11 107.483   1
  -4  -8 -18 3068.63 127.921   1
   8  18  -4 2887.69 130.735   1
   7  18  -4 1477.42 87.5495   1
  -7 -18  -4 1526.83 92.9945   1
   7 -18   4 1427.68 69.0444   1
  18  -4   7 1605.35 70.1990   1
  -4  -7 -18 1519.78 83.9944   1
   6  18  -4 3211.33 132.380   1
  -4  -6 -18 3443.87 129.251   1
  18  -4   6 3117.04 110.632   1
   6 -18   4 3169.80 112.310   1
   5  18  -4 12.4376 39.4238   1
   5 -18   4 79.9484 26.2190   1
  -4  -5 -18 70.0710 29.4525   1
  18  -4   5 128.603 27.9618   1
  -5 -18  -4 61.6834 32.3317   1
   4 -18   4 2459.73 97.0700   1
   4  18  -4 2313.75 107.780   1
  -4 -18  -4 2317.24 113.352   1
   3  18  -4 138.075 36.5378   1
  -3 -18  -4 128.095 38.9680   1
   3 -18   4 106.488 26.8928   1
   2 -18   4 4778.43 160.298   1
   2  18  -4 5058.61 167.527   1
  -2 -18  -4 4787.63 176.940   1
   1  18  -4 162.132 36.8513   1
  -1 -18  -4 195.511 40.6906   1
   1 -18   4 141.961 30.8960   1
   0 -18  -4 8662.25 264.756   1
   0  18  -4 8658.10 247.345   1
  -1  18  -4 179.330 34.9912   1
  18   4   1 178.895 38.6573   1
   1 -18  -4 128.976 39.5692   1
   2 -18  -4 4494.63 167.557   1
  18   4   2 4714.35 169.231   1
  -2  18  -4 4900.68 152.705   1
   3  18   4 95.7905 35.8572   1
  18   4   3 147.111 38.2362   1
   3 -18  -4 92.8237 34.1434   1
  18   4   4 2098.09 103.216   1
   4 -18  -4 2167.44 103.124   1
   4  18   4 2418.62 111.046   1
   5 -18  -4 85.6864 32.4025   1
   5  18   4 92.1630 35.1837   1
  18   4   5 109.448 36.2203   1
   6 -18  -4 3242.77 128.512   1
   6  18   4 3111.14 135.736   1
  18   4   6 3181.34 130.498   1
   7 -18  -4 1368.09 80.7362   1
  18   4   7 1539.28 86.8369   1
  18   4   8 3161.16 131.742   1
   8 -18  -4 3254.75 128.978   1
  18   4   9 486.004 56.3899   1
   9 -18  -4 550.802 51.4833   1
  10 -18  -4 1796.85 91.3539   1
  18   4  10 1680.81 94.0420   1
  11 -18  -4 140.751 37.0766   1
  18   4  11 91.0353 39.4417   1
  12 -18  -4 537.711 54.6336   1
  12  18   4 511.096 66.7842   1
  18   4  12 461.267 56.2256   1
  13  18   4 375.509 65.3474   1
  18   4  13 486.967 58.0961   1
  14  18   4 374.490 65.4983   1
  -4  14 -18 479.356 34.1677   1
  18   4  14 423.927 55.7579   1
  15  18   4 883.238 89.0291   1
  -4  15 -18 886.256 45.2418   1
  16  18   4-19.9409 56.1832   1
   4 -16 -18 75.1438 48.5903   1
  -4  16 -18 41.4619 20.8912   1
   4 -17 -18 2270.66 125.888   1
  -4  17 -18 2490.25 83.7645   1
  17  18   4 2423.84 137.954   1
   5  17 -18 65.0627 36.9508   1
  17 -18   5 73.8672 22.3670   1
  -5 -16 -18 2380.28 129.334   1
  16  18  -5 2050.37 126.494   1
  16 -18   5 2360.44 79.5527   1
  15  18  -5 1299.09 95.9381   1
  -5 -15 -18 1217.49 92.7701   1
  15 -18   5 1292.56 55.2156   1
  14 -18   5 1.81727 22.2510   1
  14  18  -5 17.2719 43.2810   1
  -5 -14 -18-5.50839 45.2571   1
  -5 -13 -18-10.6393 43.1953   1
  13 -18   5-3.73816 20.8152   1
  13  18  -5-16.6660 45.9077   1
 -12 -18  -5 268.420 53.0209   1
  -5 -12 -18 264.469 50.7494   1
  12 -18   5 289.024 29.2518   1
  12  18  -5 246.466 51.9278   1
  -5 -11 -18 2394.54 118.721   1
  11 -18   5 2498.92 86.9462   1
  11  18  -5 2436.95 124.254   1
 -11 -18  -5 2545.39 127.407   1
  18  -5  11 2373.28 82.9362   1
  18  -5  10-9.99257 20.9511   1
  10 -18   5 21.2324 21.6950   1
 -10 -18  -5 5.38383 41.8557   1
  -5 -10 -18 50.8473 40.7484   1
  10  18  -5 14.9549 44.3853   1
  18  -5   9 3000.05 102.263   1
   9 -18   5 3156.49 104.653   1
  -5  -9 -18 3044.03 130.863   1
  -9 -18  -5 2885.97 137.811   1
   9  18  -5 3121.68 136.259   1
  -8 -18  -5 598.711 64.9978   1
   8 -18   5 721.026 45.9727   1
  18  -5   8 766.761 46.1278   1
  -5  -8 -18 610.086 57.7660   1
   8  18  -5 664.779 63.0017   1
  18  -5   7 81.2899 23.4424   1
  -7 -18  -5 45.4733 36.3958   1
  -5  -7 -18 101.153 33.4680   1
   7 -18   5 59.1581 24.5571   1
   7  18  -5 31.2121 36.6636   1
   6  18  -5-8.56865 35.8090   1
  18  -5   6-17.5849 23.3430   1
   6 -18   5 5.19569 21.7134   1
  -5  -6 -18-7.70156 32.3657   1
  -6 -18  -5 9.84569 32.6382   1
  -5  -5 -18 157.275 33.2404   1
   5  18  -5 135.925 37.5650   1
   5 -18   5 155.153 28.0422   1
  -5 -18  -5 217.441 44.0133   1
  18  -5   5 160.661 27.9394   1
   4  18  -5 15.6837 35.6084   1
  -4 -18  -5 52.3478 33.4784   1
   4 -18   5 45.6458 23.3220   1
  -5  -4 -18 52.2965 26.5882   1
   3  18  -5 7.53567 34.7196   1
  -5  -3 -18 99.5852 30.1686   1
  -3 -18  -5 93.9576 32.2704   1
  -5  -2 -18 992.360 59.6408   1
  -2 -18  -5 883.918 69.0434   1
  -1 -18  -5 990.231 72.6104   1
   1  18  -5 876.742 60.0320   1
   0  18  -5 1728.75 81.6554   1
   0 -18  -5 1667.18 93.2109   1
  18   5   0 1542.96 89.6141   1
  -1  18  -5 989.874 59.9325   1
   1 -18  -5 858.280 67.7055   1
  18   5   1 1020.39 72.6300   1
  -2  18  -5 844.833 53.5729   1
  18   5   2 868.961 67.5952   1
   2 -18  -5 955.289 70.4508   1
  -3  18  -5 39.2355 24.7551   1
  18   5   3 30.6531 33.3827   1
   3 -18  -5 30.2952 32.3177   1
   4  18   5 36.6907 31.7436   1
  18   5   4 8.76720 31.7975   1
   4 -18  -5 51.1041 30.4275   1
   5 -18  -5 146.952 37.0578   1
   5  18   5 253.500 43.8180   1
  18   5   5 176.195 40.2042   1
   6 -18  -5-16.4433 30.9046   1
  18   5   6-4.44921 35.0365   1
  18   5   7 40.4312 35.8501   1
   7 -18  -5 89.8924 35.3139   1
  18   5   8 825.135 66.0664   1
   8 -18  -5 875.306 66.0783   1
   9 -18  -5 3295.09 131.859   1
  18   5   9 3083.26 135.440   1
  18   5  10 54.8906 42.7162   1
  10 -18  -5 61.0882 36.4633   1
  11  18   5 2447.79 128.856   1
  11 -18  -5 2656.85 114.641   1
  18   5  11 2483.20 117.222   1
  12  18   5 290.244 57.1892   1
  18   5  12 329.404 50.7310   1
  13  18   5-42.6672 57.9183   1
  14  18   5-25.0741 58.5122   1
  18   5  14-9.09067 42.9975   1
  15  18   5 1217.45 98.4381   1
  16  18   5 2641.09 143.686   1
  17  18   5 96.1085 55.1003   1
   5 -17 -18 59.7778 47.9871   1
  17 -18   6 894.612 36.3499   1
  17  18  -6 1122.04 93.2749   1
  -6 -17 -18 1023.40 91.3725   1
 -18  -6 -17 1016.55 72.3841   1
  16  18  -6 178.588 57.2521   1
  16 -18   6 75.1787 18.2697   1
  -6 -16 -18 72.0691 52.4371   1
  15 -18   6 247.442 23.1835   1
  15  18  -6 208.237 54.5410   1
  -6 -15 -18 261.343 59.5870   1
  14 -18   6 12.8177 16.3001   1
  14  18  -6-17.2255 48.7934   1
  -6 -14 -18 11.1658 42.2610   1
 -13 -18  -6 1168.38 90.8109   1
  13  18  -6 944.274 84.9316   1
  -6 -13 -18 1062.06 84.1639   1
  13 -18   6 1133.10 46.6465   1
 -12 -18  -6 389.958 61.6200   1
  12 -18   6 513.193 31.9573   1
  -6 -12 -18 477.264 62.2408   1
  12  18  -6 395.746 61.5896   1
  11 -18   6 1047.34 47.1212   1
 -11 -18  -6 861.561 78.0165   1
  -6 -11 -18 1052.28 79.3042   1
  11  18  -6 904.928 78.2858   1
  18  -6  11 975.383 42.8428   1
  18  -6  10 3697.72 113.197   1
  10 -18   6 4014.23 117.436   1
  10  18  -6 3921.18 159.145   1
 -10 -18  -6 3859.88 163.345   1
  -6 -10 -18 3946.81 156.100   1
  -6  -9 -18 857.204 68.5886   1
   9  18  -6 829.324 69.7985   1
   9 -18   6 818.537 45.6341   1
  18  -6   9 868.112 45.2148   1
  -9 -18  -6 724.794 72.7036   1
  -6  -8 -18 3624.09 141.624   1
  -8 -18  -6 3476.62 151.539   1
   8 -18   6 3658.86 114.476   1
   8  18  -6 3377.70 143.350   1
  18  -6   8 3584.81 112.957   1
  18  -6   7 207.551 28.0188   1
  -7 -18  -6 280.696 48.9495   1
  -6  -7 -18 203.273 40.8913   1
   7  18  -6 234.009 45.8860   1
  18  -6   6 2315.08 86.7029   1
  -6  -6 -18 2214.14 104.056   1
  -6 -18  -6 2198.97 113.017   1
   6  18  -6 2335.14 109.778   1
  -5 -18  -6 592.136 58.9899   1
  -6  -5 -18 513.501 49.7272   1
   4  18  -6 4545.22 160.241   1
  -4 -18  -6 4440.47 171.744   1
  -6  -4 -18 4497.35 155.043   1
   3  18  -6 654.363 56.2423   1
  -6  -3 -18 709.118 53.3074   1
  -3 -18  -6 586.671 59.1464   1
  -6  -2 -18 5067.70 165.124   1
   2  18  -6 5186.37 172.914   1
  -2 -18  -6 5352.56 188.532   1
  -1 -18  -6 265.753 46.3378   1
   1  18  -6 308.413 39.7993   1
  18   6  -1 235.918 46.5251   1
  -6  -1 -18 212.777 33.4881   1
  18   6   0 8540.26 265.473   1
   0  18  -6 8746.42 244.994   1
  -6   0 -18 8605.05 238.358   1
   0 -18  -6 8227.02 263.485   1
  18   6   1 244.163 45.1049   1
  -1  18  -6 290.149 37.1098   1
  -6   1 -18 284.612 34.3538   1
   1 -18  -6 224.149 45.5210   1
  18   6   2 5402.18 188.183   1
   2 -18  -6 5314.89 186.414   1
  -2  18  -6 5250.56 162.689   1
  18   6   3 641.938 60.9267   1
   3 -18  -6 633.575 58.5705   1
  -3  18  -6 514.739 42.0401   1
   4 -18  -6 4343.28 162.796   1
  18   6   4 4528.11 167.475   1
  18   6   5 538.368 54.6339   1
   5 -18  -6 412.683 50.0304   1
   6 -18  -6 2222.27 107.835   1
  18   6   6 2585.94 117.067   1
  18   6   7 225.941 46.5392   1
   7 -18  -6 237.424 43.9486   1
  18   6   8 3633.29 148.725   1
   8 -18  -6 3583.66 141.175   1
   9 -18  -6 780.091 66.0177   1
  18   6   9 881.851 72.7804   1
  10  18   6 3964.23 164.720   1
  18   6  10 3964.38 157.404   1
  10 -18  -6 3657.41 146.332   1
  18   6  11 1207.24 83.3504   1
  11  18   6 1057.89 87.7533   1
  12  18   6 475.066 66.3779   1
  18   6  12 488.828 60.8658   1
  13  18   6 944.562 87.0229   1
  -6  13 -18 1142.70 42.1158   1
  18   6  13 1034.35 80.0007   1
  14  18   6-6.34238 55.0557   1
  -6  14 -18-4.68201 15.9805   1
  18   6  14-38.3181 48.0103   1
  15  18   6 136.942 53.1567   1
  -6  15 -18 219.410 19.6988   1
  -6  16 -18 78.7409 15.3203   1
  16  18   6 147.219 60.4883   1
  -6  17 -18 941.778 32.7541   1
  17  18   6 949.124 93.5857   1
  -7 -17 -18 993.329 91.7177   1
 -18  -7 -17 1066.74 78.5713   1
  -7 -16 -18 4188.25 179.436   1
 -18  -7 -16 4063.00 156.716   1
  16  18  -7 4196.53 180.235   1
  15  18  -7 143.030 53.1282   1
  -7 -15 -18 93.2377 53.2194   1
  -7 -14 -18 16.8592 45.9034   1
  14  18  -7 5.74100 44.9214   1
  13  18  -7 1687.49 104.800   1
  -7 -13 -18 1664.02 104.352   1
 -12 -18  -7 3199.16 148.199   1
  -7 -12 -18 3008.01 141.173   1
  12  18  -7 3131.72 143.731   1
 -11 -18  -7 2340.91 125.769   1
  11  18  -7 2631.35 127.786   1
  -7 -11 -18 2304.94 119.115   1
 -10 -18  -7 850.823 76.9598   1
  18  -7  10 891.495 38.9777   1
  10  18  -7 1004.09 77.9594   1
  -7 -10 -18 977.255 76.5015   1
  18  -7   9 57.8376 18.9909   1
   9  18  -7 89.9963 38.7152   1
  -9 -18  -7 64.7294 43.2983   1
  -7  -9 -18 59.3076 34.7979   1
  -7  -8 -18 161.797 38.3477   1
  -8 -18  -7 126.780 46.9568   1
   8  18  -7 209.492 42.8714   1
  18  -7   8 175.885 25.9231   1
  -7  -7 -18 2909.04 123.221   1
  18  -7   7 3114.61 98.9568   1
  -7 -18  -7 2632.88 130.827   1
   7  18  -7 2831.62 125.669   1
   6  18  -7 526.831 54.2893   1
  -7  -6 -18 371.162 45.9598   1
  -6 -18  -7 433.684 55.2801   1
  18  -7   6 429.503 35.3512   1
  -5 -18  -7 835.758 71.2418   1
  -7  -5 -18 836.137 61.0041   1
   5  18  -7 745.475 60.9133   1
   4  18  -7 215.351 39.0863   1
  -7  -4 -18 260.455 38.0789   1
  -4 -18  -7 274.907 48.8213   1
  -3 -18  -7 8285.60 256.497   1
   3  18  -7 7868.46 237.577   1
  -7  -3 -18 7688.51 231.005   1
  -2 -18  -7 542.678 58.7282   1
   2  18  -7 486.115 50.5483   1
  -7  -2 -18 433.598 45.4566   1
  -7  -1 -18 5464.96 170.354   1
   1  18  -7 5398.86 175.544   1
  -1 -18  -7 5385.48 193.646   1
  18   7  -1 5720.09 197.364   1
   0 -18  -7 75.9425 39.4674   1
  18   7   0 47.8365 37.9275   1
  -7   0 -18 66.6347 27.8579   1
   0  18  -7 40.4494 28.1404   1
  -7   1 -18 5683.28 166.761   1
  18   7   1 5195.46 191.843   1
   1 -18  -7 5524.06 195.539   1
  -1  18  -7 5644.21 171.929   1
  -2  18  -7 507.966 42.9373   1
  -7   2 -18 443.938 38.4004   1
  18   7   2 483.417 58.5453   1
   2 -18  -7 488.648 55.5166   1
  -3  18  -7 7875.42 219.197   1
  -7   3 -18 7936.73 216.270   1
  18   7   3 8427.60 257.686   1
   3 -18  -7 7839.31 250.736   1
   4 -18  -7 264.295 45.5496   1
  -7   4 -18 222.973 27.7473   1
  18   7   4 233.262 45.1353   1
   5 -18  -7 728.823 62.8987   1
  18   7   5 897.800 71.4753   1
  -7   5 -18 749.943 42.4520   1
  18   7   6 447.668 55.9364   1
  -7   6 -18 465.891 33.1632   1
   6 -18  -7 401.227 51.0097   1
  18   7   7 3172.45 137.605   1
  -7   7 -18 3037.91 94.5808   1
   7 -18  -7 3077.10 129.589   1
   8 -18  -7 192.062 42.2083   1
  18   7   8 173.579 46.6798   1
   9  18   7 5.47312 40.8937   1
  18   7   9 80.4459 41.3445   1
   9 -18  -7 140.489 39.7031   1
  10  18   7 1115.34 85.9475   1
  10 -18  -7 981.377 72.3437   1
  18   7  10 976.075 77.3309   1
  18   7  11 2652.00 125.365   1
  11  18   7 2361.21 127.368   1
  12  18   7 3467.58 154.358   1
  18   7  12 3453.30 144.588   1
  13  18   7 1745.32 110.955   1
  18   7  13 1565.78 98.4412   1
  18   7  14-50.2073 51.1080   1
  14  18   7 31.7775 52.5221   1
  15  18   7 104.723 52.5617   1
  16  18   7 4387.79 191.901   1
  17  18   7 1181.60 102.914   1
  -8 -17 -18 2689.56 140.317   1
 -18  -8 -17 2393.79 119.074   1
  -8 -16 -18 410.406 66.9282   1
  16  18  -8 390.082 67.0812   1
 -18  -8 -16 379.859 56.6505   1
  -8 -15 -18 4138.22 170.926   1
  15  18  -8 3717.16 166.837   1
 -18  -8 -15 3730.45 150.672   1
  -8 -14 -18 56.3923 44.1363   1
  14  18  -8 34.6200 46.3022   1
  -8 -13 -18 147.329 52.1810   1
  13  18  -8 161.316 51.0942   1
  -8 -12 -18 813.506 79.3263   1
  12  18  -8 1076.95 86.2621   1
  -8 -11 -18 1595.02 100.814   1
 -11 -18  -8 1618.24 103.476   1
  11  18  -8 1685.27 103.194   1
  10  18  -8 142.820 46.2727   1
 -10 -18  -8 99.8805 45.1565   1
  -8 -10 -18 159.982 44.1134   1
   9  18  -8 2651.50 123.890   1
  -9 -18  -8 2529.08 129.291   1
  18  -8   9 2701.51 80.0369   1
  -8  -9 -18 2835.96 124.568   1
  -8 -18  -8 64.5034 43.1296   1
  -8  -8 -18 26.5214 34.1470   1
   8  18  -8 58.9809 33.3962   1
  18  -8   8 18.2849 18.3744   1
  18  -8   7 3871.46 118.361   1
  -7 -18  -8 3944.27 164.383   1
   7  18  -8 4139.96 154.944   1
  -8  -7 -18 4116.38 152.431   1
  18  -8   6 2.00846 19.7350   1
   6  18  -8 49.9078 33.7709   1
  -6 -18  -8-36.4813 47.7616   1
  -8  -6 -18-35.9201 32.7914   1
  -8  -5 -18 1071.04 69.0186   1
   5  18  -8 1076.68 71.9801   1
  -5 -18  -8 1159.47 82.9764   1
  -8  -4 -18 68.4367 30.5524   1
  -4 -18  -8 188.902 45.5319   1
   4  18  -8 141.282 38.3620   1
   3  18  -8 283.016 47.6185   1
  -3 -18  -8 434.359 55.3131   1
  -8  -3 -18 319.349 44.0507   1
   2  18  -8 531.401 54.1371   1
  -8  -2 -18 385.907 44.5331   1
  -2 -18  -8 446.751 59.8356   1
  18   8  -2 451.904 57.8873   1
  18   8  -1 292.837 52.4985   1
  -1 -18  -8 256.250 48.3327   1
   1  18  -8 230.421 38.2084   1
  -8  -1 -18 227.000 36.4983   1
  -8   0 -18 476.727 41.8471   1
   0  18  -8 460.195 44.0173   1
  18   8   0 345.701 54.8434   1
   0 -18  -8 459.268 56.8068   1
  18   8   1 323.273 51.7383   1
  -8   1 -18 274.360 32.7282   1
  -1  18  -8 316.965 39.2194   1
   1 -18  -8 235.534 45.3164   1
  -2  18  -8 466.393 43.0232   1
  -8   2 -18 408.688 37.6061   1
   2 -18  -8 545.825 59.6076   1
  18   8   2 494.246 59.4741   1
  -3  18  -8 292.263 34.7186   1
   3 -18  -8 276.049 50.0586   1
  -8   3 -18 334.109 33.8899   1
  18   8   3 355.828 55.8216   1
  -4  18  -8 111.597 26.0828   1
  -8   4 -18 138.311 26.0099   1
  18   8   4 129.042 42.9501   1
   4 -18  -8 128.555 40.3657   1
  -8   5 -18 1020.94 48.3040   1
  18   8   5 936.959 74.4003   1
   5 -18  -8 913.104 70.9998   1
  18   8   6 10.1606 42.2224   1
   6 -18  -8 9.08383 34.8486   1
  -8   6 -18 4.83275 18.5542   1
  -8   7 -18 4037.81 114.652   1
   7 -18  -8 4043.62 155.814   1
  18   8   7 4136.84 165.284   1
  18   8   8 20.7554 37.6352   1
  -8   8 -18 30.9157 15.8171   1
   8  18   8 21.6216 42.3006   1
   8 -18  -8 49.9477 35.0774   1
  18   8   9 2899.21 131.479   1
   9  18   8 2541.45 129.367   1
  -8   9 -18 2585.51 74.8849   1
   9 -18  -8 2686.15 121.328   1
  -8  10 -18 158.278 13.7212   1
  10  18   8 148.138 46.1151   1
  18   8  10 99.1970 46.6112   1
  18   8  11 1776.25 102.947   1
  11  18   8 1619.62 107.338   1
  18   8  12 1164.28 87.3475   1
  12  18   8 821.840 84.1186   1
  18   8  13 109.898 51.3612   1
  13  18   8 266.202 59.9598   1
  18   8  14-36.8106 56.1011   1
  14  18   8 38.1226 49.7155   1
  18   8  15 3748.67 162.297   1
  15  18   8 3939.89 176.534   1
  16  18   8 553.707 76.2048   1
  -9 -17 -18 251.748 58.3639   1
 -18  -9 -17 368.983 56.4201   1
  -9 -16 -18-6.09424 54.7999   1
  16  18  -9 30.8368 45.3919   1
 -18  -9 -16 63.1356 45.3365   1
 -18  -9 -15-47.9922 46.1949   1
  15  18  -9 23.8141 43.5030   1
  -9 -15 -18-70.7830 50.9424   1
  -9 -14 -18 328.438 60.3376   1
  14  18  -9 408.222 64.1436   1
  13  18  -9 5595.26 210.360   1
  -9 -13 -18 5935.23 213.499   1
  -9 -12 -18 220.703 56.0300   1
  12  18  -9 363.083 63.0748   1
  -9 -11 -18 6168.85 214.387   1
  11  18  -9 5817.71 212.356   1
  -9 -10 -18 24.3656 39.8045   1
  10  18  -9-4.95329 40.6967   1
 -10 -18  -9 5.65069 45.0567   1
  -9  -9 -18 51.2825 39.6242   1
   9  18  -9 37.8789 38.2245   1
  -9 -18  -9 11.0657 44.9326   1
  18  -9   9 33.7115 10.2718   1
  18  -9   8 111.311 19.1995   1
   8  18  -9 149.416 44.7462   1
  -9  -8 -18 98.0356 38.7711   1
  -8 -18  -9 152.550 47.3666   1
  -7 -18  -9 4550.88 183.117   1
  18  -9   7 4639.54 132.171   1
  -9  -7 -18 4938.47 172.249   1
   7  18  -9 4945.71 173.041   1
  18  -9   6 1088.08 50.3216   1
  -9  -6 -18 925.395 67.1395   1
   6  18  -9 1034.05 72.3743   1
  -6 -18  -9 1081.15 83.2097   1
  -5 -18  -9 142.422 49.0130   1
  -9  -5 -18 249.961 40.1493   1
   5  18  -9 213.083 42.7849   1
  -4 -18  -9 4862.62 188.473   1
  -9  -4 -18 4949.55 169.688   1
  18   9  -3 12012.7 362.818   1
  -3 -18  -9 12826.4 367.617   1
  -9  -3 -18 13045.2 342.623   1
   3  18  -9 12513.4 342.805   1
   2  18  -9 17.0474 32.3995   1
  18   9  -2 56.5396 42.2352   1
  -2 -18  -9 25.5541 37.6178   1
  -9  -2 -18 29.0331 30.5222   1
   1  18  -9 2826.30 110.276   1
  18   9  -1 2719.44 130.127   1
  -9  -1 -18 2798.88 107.622   1
  -1 -18  -9 2621.48 127.365   1
   0 -18  -9 3034.16 136.483   1
  18   9   0 3083.92 137.256   1
   0  18  -9 2900.19 112.586   1
  -9   0 -18 3051.18 110.617   1
  -1  18  -9 2666.96 104.133   1
  18   9   1 2862.82 131.616   1
  -9   1 -18 2787.88 102.042   1
   1 -18  -9 2584.98 124.876   1
  -9   2 -18 33.5696 25.7750   1
  18   9   2 50.9433 44.0015   1
   2 -18  -9 34.1002 39.3317   1
  -2  18  -9 56.8498 27.2985   1
   3 -18  -9 12948.8 363.583   1
  -3  18  -9 12833.6 323.439   1
  18   9   3 12275.1 366.423   1
  -9   3 -18 12441.1 320.199   1
  -4  18  -9 5060.91 147.734   1
   4 -18  -9 5038.56 183.773   1
  -9   4 -18 5034.58 146.638   1
  18   9   4 5080.09 189.813   1
  -9   5 -18 279.497 27.6453   1
   5 -18  -9 197.813 45.4321   1
  18   9   5 136.242 46.0168   1
  -9   6 -18 1049.37 46.8503   1
   6 -18  -9 1030.91 77.0441   1
  18   9   7 5107.42 187.297   1
  -9   7 -18 4644.51 127.269   1
   7 -18  -9 4732.90 175.413   1
  18   9   8 91.7903 48.3707   1
  -9   8 -18 104.716 16.3365   1
   8  18   9 111.023 47.4874   1
   8 -18  -9 122.278 39.5994   1
  -9   9 -18 9.23286 8.43158   1
  18   9   9-10.8753 47.2026   1
   9  18   9 62.1768 45.0708   1
  10  18   9-17.3440 48.3274   1
  18   9  10-54.5055 54.8522   1
  18   9  11 6325.58 222.815   1
  11  18   9 5998.35 225.619   1
  12  18   9 304.697 64.8979   1
  18   9  12 287.436 61.6970   1
  18   9  13 5709.67 212.663   1
  13  18   9 5834.66 220.173   1
  14  18   9 418.747 67.2492   1
  18   9  14 290.894 58.6580   1
  18   9  15-22.3369 50.2202   1
  15  18   9-59.3649 59.3170   1
  16  18   9 6.75709 53.8786   1
 -18 -10 -17 5.14228 47.1259   1
 -10 -17 -18-6.33258 48.9102   1
 -10 -16 -18 42.8268 49.3823   1
 -18 -10 -16-45.6097 47.5158   1
 -16 -18 -10-12.5457 51.5382   1
  16  18 -10 6.21775 43.7239   1
 -18 -10 -15 1215.03 87.4897   1
 -15 -18 -10 1366.53 98.9019   1
  15  18 -10 1307.68 94.8627   1
 -10 -15 -18 1231.07 94.8792   1
 -10 -14 -18-11.4204 49.0489   1
  14  18 -10 23.0715 49.0142   1
 -10 -13 -18 1031.26 85.3710   1
  13  18 -10 1038.74 85.2373   1
 -10 -12 -18 3345.02 149.128   1
  12  18 -10 3348.43 152.451   1
  11  18 -10 215.450 59.7507   1
 -10 -11 -18 168.156 50.2430   1
 -10 -10 -18 3346.45 144.860   1
  10  18 -10 3339.53 143.814   1
 -10  -9 -18 200.878 46.9710   1
  -9 -18 -10 112.548 47.1793   1
   9  18 -10 185.246 49.2146   1
  18 -10   8 1481.85 48.0030   1
 -10  -8 -18 1649.01 91.0961   1
   8  18 -10 1713.60 93.6199   1
  -8 -18 -10 1343.50 95.3622   1
 -10  -7 -18 277.506 44.3761   1
  18 -10   7 206.117 23.6461   1
   7  18 -10 186.290 44.0307   1
  -7 -18 -10 235.751 52.0883   1
   6  18 -10 285.259 49.2642   1
 -10  -6 -18 313.245 45.7368   1
  -6 -18 -10 403.009 59.7308   1
  -5 -18 -10 328.541 55.1182   1
 -10  -5 -18 328.360 47.7582   1
   5  18 -10 343.165 50.2208   1
  -4 -18 -10 966.631 78.6761   1
  18  10  -4 985.371 78.4605   1
   4  18 -10 817.961 63.8734   1
 -10  -4 -18 1003.81 67.8601   1
 -10  -3 -18 482.854 49.5499   1
  18  10  -3 573.622 63.7094   1
  -3 -18 -10 526.616 62.3192   1
   3  18 -10 558.905 54.7220   1
  18  10  -2 2875.91 134.737   1
 -10  -2 -18 2894.76 113.428   1
  -2 -18 -10 2778.61 133.252   1
   2  18 -10 2999.04 117.815   1
  18  10  -1 489.782 62.6577   1
  -1 -18 -10 579.927 64.1508   1
 -10  -1 -18 496.821 46.0313   1
   1  18 -10 551.831 48.0647   1
   0  18 -10 5211.06 163.809   1
 -10   0 -18 5230.35 161.147   1
  18  10   0 4843.93 189.355   1
   0 -18 -10 5194.39 192.599   1
   1 -18 -10 465.198 59.1308   1
  -1  18 -10 483.547 44.5417   1
 -10   1 -18 427.079 41.1869   1
  18  10   1 478.923 61.6499   1
   2 -18 -10 2962.32 133.237   1
 -10   2 -18 2820.75 101.499   1
  18  10   2 2822.84 135.267   1
  -2  18 -10 2865.23 104.354   1
  -3  18 -10 651.563 43.5666   1
 -10   3 -18 443.148 38.4825   1
   3 -18 -10 558.208 63.2794   1
  18  10   3 579.827 69.3585   1
 -10   4 -18 1019.14 49.4156   1
  -4  18 -10 1017.71 50.9355   1
  18  10   5 321.034 60.8192   1
 -10   5 -18 334.673 29.3445   1
   5 -18 -10 266.970 50.2848   1
   6 -18 -10 361.966 54.3107   1
  18  10   6 363.478 62.7809   1
 -10   6 -18 345.348 26.9902   1
  18  10   7 221.570 50.5205   1
   7 -18 -10 189.346 47.5626   1
 -10   7 -18 221.843 20.4983   1
   8 -18 -10 1559.89 93.3160   1
 -10   8 -18 1305.71 39.7318   1
  18  10   8 1633.93 100.527   1
  18  10   9 152.229 49.5656   1
  10  18  10 3075.88 150.345   1
  18  10  10 3158.63 146.952   1
  18  10  11 112.904 54.0544   1
  11  18  10 325.350 63.5436   1
  18  10  12 3313.23 154.156   1
  12  18  10 3441.15 160.187   1
  18  10  13 766.291 79.7564   1
  13  18  10 833.287 83.1679   1
  18  10  14-28.5805 45.8644   1
  14  18  10-38.9322 55.4435   1
  15  18  10 1391.30 103.578   1
  18  10  15 1146.31 91.8383   1
 -18 -11 -17-26.8284 46.8211   1
 -11 -17 -18-12.6404 46.1762   1
 -18 -11 -16 868.486 76.8921   1
 -11 -16 -18 934.357 86.7619   1
 -16 -18 -11 930.218 85.5815   1
 -15 -18 -11 776.299 82.4903   1
 -18 -11 -15 905.556 77.1840   1
 -11 -15 -18 846.536 81.1969   1
  15  18 -11 791.922 79.6198   1
 -14 -18 -11 967.809 87.2090   1
  14  18 -11 786.922 75.9497   1
 -18 -11 -14 751.733 73.8527   1
 -11 -14 -18 782.694 77.9303   1
  13  18 -11 44.8327 46.8418   1
 -11 -13 -18 5.53982 53.5424   1
 -11 -12 -18 106.629 47.9678   1
  12  18 -11 48.5587 50.3900   1
  11  18 -11 3767.75 164.130   1
 -11 -11 -18 4366.65 168.968   1
  10  18 -11 3371.02 147.392   1
 -11 -10 -18 3289.92 144.549   1
 -11  -9 -18 89.5877 43.8539   1
   9  18 -11 80.5090 41.9999   1
 -11  -8 -18 9.02493 39.7780   1
   8  18 -11 9.07965 38.1568   1
  -8 -18 -11-28.2803 43.3966   1
 -11  -7 -18 3452.12 138.443   1
  18 -11   7 3263.77 92.4589   1
   7  18 -11 3324.90 137.579   1
  -7 -18 -11 3106.04 147.905   1
 -11  -6 -18 9962.15 282.234   1
   6  18 -11 9159.22 278.076   1
  -6 -18 -11 9248.03 299.398   1
  18  11  -5 137.755 48.4607   1
  -5 -18 -11 171.031 50.6886   1
   5  18 -11 208.813 47.7399   1
 -11  -5 -18 136.123 40.9277   1
 -11  -4 -18 6995.50 214.472   1
   4  18 -11 6933.47 214.580   1
  18  11  -4 6643.89 234.756   1
  -4 -18 -11 6751.40 236.013   1
 -11  -3 -18 2247.49 98.9424   1
  18  11  -3 2127.25 116.408   1
   3  18 -11 2159.22 98.8004   1
  -3 -18 -11 2229.47 118.507   1
  18  11  -2-21.8083 42.9335   1
 -11  -2 -18-9.74280 30.1778   1
  -2 -18 -11-16.1201 39.5451   1
   2  18 -11-6.69541 30.6809   1
 -11  -1 -18 93.8069 29.1723   1
  18  11  -1 43.3481 41.6092   1
  -1 -18 -11 37.0829 42.7930   1
   1  18 -11 101.443 31.9449   1
   0  18 -11 980.513 60.0689   1
 -11   0 -18 1008.31 58.6426   1
  18  11   0 1168.02 86.1421   1
   0 -18 -11 1022.94 80.8110   1
 -11   1 -18 28.2013 23.7227   1
   1 -18 -11 30.9711 41.6686   1
  18  11   1 76.2363 43.9574   1
  -1  18 -11 10.9461 32.5338   1
 -11   2 -18 41.9121 22.4092   1
   2 -18 -11 5.08132 43.1801   1
  -2  18 -11-35.3845 32.9861   1
  18  11   2 5.48010 47.0724   1
   3 -18 -11 2293.76 117.115   1
  18  11   3 2041.51 117.092   1
  -3  18 -11 2172.82 83.4127   1
 -11   3 -18 2163.18 80.5187   1
  -4  18 -11 7007.12 188.214   1
 -11   4 -18 6929.79 185.708   1
   4 -18 -11 6600.17 231.095   1
  18  11   4 6835.24 240.241   1
  -5  18 -11 196.527 25.6495   1
  18  11   5 95.9585 53.5212   1
   5 -18 -11 64.8940 48.7868   1
 -11   5 -18 174.898 24.3603   1
   6 -18 -11 9491.11 290.895   1
  18  11   6 9485.19 300.927   1
 -11   6 -18 9218.56 228.538   1
   7 -18 -11 3143.94 143.924   1
 -11   7 -18 3244.11 86.0490   1
  18  11   7 3394.33 153.294   1
   8 -18 -11-50.6952 51.2139   1
  18  11   8-11.6620 45.3365   1
  18  11   9 64.3993 48.4007   1
  18  11  10 3396.62 157.329   1
  18  11  11 3781.83 167.332   1
  11  18  11 3883.46 171.137   1
  12  18  11 94.4393 51.7602   1
  18  11  12 70.3988 52.0076   1
  18  11  13 76.6735 49.9291   1
  13  18  11 192.291 55.1319   1
  14  18  11 839.426 84.0933   1
  18  11  14 768.013 81.4597   1
  18  11  15 1106.77 88.7348   1
  15  18  11 831.392 88.5505   1
 -17 -18 -12 1720.96 116.117   1
 -18 -12 -17 1664.10 109.285   1
 -12 -17 -18 2018.34 121.031   1
 -18 -12 -16 435.700 67.5243   1
 -12 -16 -18 406.613 65.4952   1
  15  18 -12 42.6517 48.2854   1
 -15 -18 -12-12.6573 51.9983   1
 -18 -12 -15 38.1696 46.3390   1
 -12 -15 -18 17.8752 46.9219   1
 -14 -18 -12 236.183 60.6064   1
 -12 -14 -18 241.471 57.0238   1
  14  18 -12 304.754 58.1165   1
 -18 -12 -14 269.872 57.0850   1
 -13 -18 -12-48.7398 50.6423   1
  13  18 -12-5.64658 48.5103   1
 -12 -13 -18-55.4313 54.0279   1
  12  18 -12 195.520 54.7836   1
 -12 -12 -18 150.140 50.6435   1
  11  18 -12 109.619 46.7235   1
 -12 -11 -18 10.3351 43.4508   1
  10  18 -12 25.0196 46.7172   1
 -12 -10 -18 59.5137 43.5078   1
   9  18 -12 840.464 71.2803   1
 -12  -9 -18 807.516 71.3018   1
   8  18 -12 524.305 59.4530   1
 -12  -8 -18 422.339 52.7198   1
  18  12  -7 1413.13 99.4831   1
   7  18 -12 1612.43 91.8399   1
  18 -12   7 1473.06 47.8572   1
 -12  -7 -18 1670.78 91.9157   1
  -7 -18 -12 1385.50 98.2448   1
  -6 -18 -12 1939.34 112.353   1
   6  18 -12 1769.90 96.8113   1
  18  12  -6 1597.79 103.951   1
 -12  -6 -18 1815.40 94.2902   1
  -5 -18 -12 33.6025 42.9729   1
  18  12  -5 79.3871 49.2259   1
   5  18 -12-43.6444 43.0552   1
 -12  -5 -18 46.7134 35.8452   1
   4  18 -12 2384.01 106.887   1
  -4 -18 -12 2192.38 120.307   1
 -12  -4 -18 2195.26 102.106   1
  18  12  -4 2557.25 128.182   1
  18  12  -3-22.5036 44.8625   1
  -3 -18 -12-66.2972 47.4595   1
   3  18 -12-46.1477 38.3940   1
 -12  -3 -18 27.6972 29.7445   1
  18  12  -2 245.736 51.3727   1
  -2 -18 -12 191.847 47.5384   1
   2  18 -12 183.388 35.1072   1
 -12  -2 -18 194.424 34.7325   1
  18  12  -1 2746.43 134.489   1
  -1 -18 -12 2538.31 127.851   1
   1  18 -12 2510.27 103.183   1
 -12  -1 -18 2662.55 103.424   1
  18  12   0 813.071 75.9666   1
 -12   0 -18 861.286 54.1288   1
   0  18 -12 816.891 55.3700   1
   0 -18 -12 799.627 75.0410   1
  -1  18 -12 2546.61 98.5978   1
   1 -18 -12 2571.60 127.313   1
  18  12   1 2381.73 127.625   1
 -12   1 -18 2669.10 97.0048   1
   2 -18 -12 192.470 48.9340   1
  -2  18 -12 176.500 31.6286   1
 -12   2 -18 204.061 28.0430   1
  18  12   2 96.4481 45.6881   1
  18  12   3-34.5261 53.4701   1
  -3  18 -12-15.5462 24.3397   1
 -12   3 -18-3.99516 19.7094   1
   3 -18 -12-20.7371 45.0032   1
  -4  18 -12 2430.48 83.4724   1
 -12   4 -18 2282.28 79.7814   1
  18  12   4 2070.69 123.016   1
   4 -18 -12 2350.03 121.106   1
  -5  18 -12 40.7605 20.0403   1
 -12   5 -18 22.1869 19.6273   1
  18  12   5-17.5935 55.4781   1
   5 -18 -12 15.4447 45.1565   1
 -12   6 -18 1744.41 56.6724   1
  18  12   6 1915.38 115.652   1
   6 -18 -12 1739.69 104.071   1
   7 -18 -12 1393.53 95.2721   1
  18  12   7 1565.78 104.076   1
  18  12   8 337.672 58.2731   1
  18  12   9 832.479 81.5910   1
  18  12  10 145.504 54.8721   1
  18  12  11 84.5061 51.8827   1
  18  12  12 121.761 54.8076   1
  18  12  13-18.3298 53.0377   1
  13  18  12 19.6499 47.4995   1
  14  18  12 300.648 63.3403   1
  18  12  14 351.978 63.5106   1
  18  12  15 18.8156 47.4776   1
 -17 -18 -13 13.0441 54.5128   1
 -18 -13 -17-17.4018 49.5601   1
 -13 -17 -18-25.5958 53.1825   1
[truncated: 611,305 more chars]
