# Supplementary material for: Russian Doll-like 3d–4f Cluster Wheels with Slow Relaxation of Magnetization
Source: Molecules. 2023 Aug 6;28(15):5906. doi: 10.3390/molecules28155906 (PMC10421525; doi:10.3390/molecules28155906)
Supplement: Supplementary file 1 [file molecules-28-05906-s001.zip › CCDC 2252492.cif]

 
data_YS-PD-107-100K
 
_audit_creation_method            'SHELXL-2014/7'
_shelx_SHELXL_version_number      '2014/7'
_chemical_name_systematic         ?
_chemical_name_common             ?
_chemical_melting_point           ?
_chemical_formula_moiety          
 'C144 H114 Cl13 Dy7 N12 Ni6 O30, 2(Cl) '
_chemical_formula_sum
 'C144 H114 Cl15 Dy7 N12 Ni6 O30' 
_chemical_formula_weight          4513.98

loop_
 _atom_type_symbol
 _atom_type_description
 _atom_type_scat_dispersion_real
 _atom_type_scat_dispersion_imag
 _atom_type_scat_source
 'C'  'C'   0.0033   0.0016
 'International Tables Vol C Tables 4.2.6.8 and 6.1.1.4'
 'H'  'H'   0.0000   0.0000
 'International Tables Vol C Tables 4.2.6.8 and 6.1.1.4'
 'N'  'N'   0.0061   0.0033
 'International Tables Vol C Tables 4.2.6.8 and 6.1.1.4'
 'O'  'O'   0.0106   0.0060
 'International Tables Vol C Tables 4.2.6.8 and 6.1.1.4'
 'Cl'  'Cl'   0.1484   0.1585
 'International Tables Vol C Tables 4.2.6.8 and 6.1.1.4'
 'Dy'  'Dy'  -0.1892   4.4098
 'International Tables Vol C Tables 4.2.6.8 and 6.1.1.4'
 'Ni'  'Ni'   0.3393   1.1124
 'International Tables Vol C Tables 4.2.6.8 and 6.1.1.4'
 
_space_group_crystal_system       trigonal
_space_group_IT_number            148
_space_group_name_H-M_alt         'R -3 :H'
_space_group_name_Hall            '-R 3'
 
_shelx_space_group_comment
;
The symmetry employed for this shelxl refinement is uniquely defined
by the following loop, which should always be used as a source of
symmetry information in preference to the above space-group names.
They are only intended as comments.
;
 
loop_
 _space_group_symop_operation_xyz
 'x, y, z'
 '-y, x-y, z'
 '-x+y, -x, z'
 'x+2/3, y+1/3, z+1/3'
 '-y+2/3, x-y+1/3, z+1/3'
 '-x+y+2/3, -x+1/3, z+1/3'
 'x+1/3, y+2/3, z+2/3'
 '-y+1/3, x-y+2/3, z+2/3'
 '-x+y+1/3, -x+2/3, z+2/3'
 '-x, -y, -z'
 'y, -x+y, -z'
 'x-y, x, -z'
 '-x+2/3, -y+1/3, -z+1/3'
 'y+2/3, -x+y+1/3, -z+1/3'
 'x-y+2/3, x+1/3, -z+1/3'
 '-x+1/3, -y+2/3, -z+2/3'
 'y+1/3, -x+y+2/3, -z+2/3'
 'x-y+1/3, x+2/3, -z+2/3'
 
_cell_length_a                    20.4123(4)
_cell_length_b                    20.4123(4)
_cell_length_c                    32.2304(8)
_cell_angle_alpha                 90
_cell_angle_beta                  90
_cell_angle_gamma                 120
_cell_volume                      11630.1(5)
_cell_formula_units_Z             3
_cell_measurement_temperature     153(2)
_cell_measurement_reflns_used     11424
_cell_measurement_theta_min       2.0000
_cell_measurement_theta_max       31.1200
 
_exptl_crystal_description        block
_exptl_crystal_colour             ?
_exptl_crystal_density_meas       ?
_exptl_crystal_density_method     ?
_exptl_crystal_density_diffrn     1.934          
_exptl_crystal_F_000              6561
_exptl_transmission_factor_min    ?
_exptl_transmission_factor_max    ?
_exptl_crystal_size_max           0.260
_exptl_crystal_size_mid           0.230
_exptl_crystal_size_min           0.170
_exptl_absorpt_coefficient_mu     4.368
_shelx_estimated_absorpt_T_min    0.396
_shelx_estimated_absorpt_T_max    0.524
_exptl_absorpt_correction_type    multi-scan
_exptl_absorpt_correction_T_min   0.334
_exptl_absorpt_correction_T_max   0.476
_exptl_absorpt_process_details
;
CrysAlisPro 1.171.40.14a (Rigaku Oxford Diffraction, 2018)
Empirical absorption correction using spherical harmonics,
 implemented in SCALE3 ABSPACK scaling algorithm.
;
_exptl_absorpt_special_details    ?
_diffrn_ambient_temperature       153(2)
_diffrn_radiation_wavelength      0.71073
_diffrn_radiation_type            MoK\a
_diffrn_source                    'Rotating-anode X-ray tube'
_diffrn_measurement_device_type   'ROD, Synergy Custom DW system, HyPix'
_diffrn_measurement_method        '\w scans'
_diffrn_detector_area_resol_mean  ?
_diffrn_reflns_number             15007
_diffrn_reflns_av_unetI/netI      0.0256
_diffrn_reflns_av_R_equivalents   0.0275
_diffrn_reflns_limit_h_min        -13
_diffrn_reflns_limit_h_max        23
_diffrn_reflns_limit_k_min        -24
_diffrn_reflns_limit_k_max        24
_diffrn_reflns_limit_l_min        -38
_diffrn_reflns_limit_l_max        36
_diffrn_reflns_theta_min          1.995
_diffrn_reflns_theta_max          25.011
_diffrn_reflns_theta_full         25.011
_diffrn_measured_fraction_theta_max   0.998
_diffrn_measured_fraction_theta_full  0.998
_diffrn_reflns_Laue_measured_fraction_max    0.998
_diffrn_reflns_Laue_measured_fraction_full   0.998
_diffrn_reflns_point_group_measured_fraction_max   0.998
_diffrn_reflns_point_group_measured_fraction_full  0.998
_reflns_number_total              4561
_reflns_number_gt                 4074
_reflns_threshold_expression      'I > 2\s(I)'
_reflns_Friedel_coverage          0.000
_reflns_Friedel_fraction_max      .
_reflns_Friedel_fraction_full     .
 
_reflns_special_details
;
 Reflections were merged by SHELXL according to the crystal
 class for the calculation of statistics and refinement.
 
 _reflns_Friedel_fraction is defined as the number of unique
 Friedel pairs measured divided by the number that would be
 possible theoretically, ignoring centric projections and
 systematic absences.
;
 
_computing_data_collection        'CrysAlisPro 1.171.40.14a (Rigaku OD, 2018)'
_computing_cell_refinement        'CrysAlisPro 1.171.40.14a (Rigaku OD, 2018)'
_computing_data_reduction         'CrysAlisPro 1.171.40.14a (Rigaku OD, 2018)'
_computing_structure_solution     'SHELXS-97 (Sheldrick, 2008)'
_computing_structure_refinement   'SHELXL-2014/7 (Sheldrick, 2014)'
_computing_molecular_graphics     ?
_computing_publication_material   ?
_refine_special_details           ?
_refine_ls_structure_factor_coef  Fsqd
_refine_ls_matrix_type            full
_refine_ls_weighting_scheme       calc
_refine_ls_weighting_details
'w=1/[\s^2^(Fo^2^)+(0.0617P)^2^+281.7631P] where P=(Fo^2^+2Fc^2^)/3'
_atom_sites_solution_primary      ?
_atom_sites_solution_secondary    ?
_atom_sites_solution_hydrogens    mixed
_refine_ls_hydrogen_treatment     constr
_refine_ls_extinction_method      none
_refine_ls_extinction_coef        .
_refine_ls_number_reflns          4561
_refine_ls_number_parameters      395
_refine_ls_number_restraints      322
_refine_ls_R_factor_all           0.0549
_refine_ls_R_factor_gt            0.0489
_refine_ls_wR_factor_ref          0.1383
_refine_ls_wR_factor_gt           0.1313
_refine_ls_goodness_of_fit_ref    1.105
_refine_ls_restrained_S_all       1.192
_refine_ls_shift/su_max           0.001
_refine_ls_shift/su_mean          0.000
 
loop_
 _atom_site_label
 _atom_site_type_symbol
 _atom_site_fract_x
 _atom_site_fract_y
 _atom_site_fract_z
 _atom_site_U_iso_or_equiv
 _atom_site_adp_type
 _atom_site_occupancy
 _atom_site_site_symmetry_order  
 _atom_site_calc_flag
 _atom_site_refinement_flags_posn
 _atom_site_refinement_flags_adp
 _atom_site_refinement_flags_occupancy
 _atom_site_disorder_assembly
 _atom_site_disorder_group
Dy1 Dy 0.47656(2) 0.31052(2) 0.33162(2) 0.04438(17) Uani 1 1 d . . . . .
Dy2 Dy 0.6667 0.3333 0.30216(4) 0.0333(3) Uani 0.5 3 d S T P . .
Ni1 Ni 0.36134(5) 0.15140(5) 0.29325(3) 0.0377(2) Uani 1 1 d . . . . .
O1 O 0.4007(3) 0.3461(3) 0.36293(17) 0.0389(12) Uani 1 1 d . . . . .
C1 C 0.3274(4) 0.3065(4) 0.3743(2) 0.0356(15) Uani 1 1 d . U . . .
C2 C 0.3098(4) 0.2907(4) 0.4159(3) 0.0436(16) Uani 1 1 d . U . . .
H2 H 0.3496 0.3098 0.4357 0.052 Uiso 1 1 calc R U . . .
C3 C 0.2358(5) 0.2477(5) 0.4295(3) 0.0483(18) Uani 1 1 d . U . . .
H3 H 0.2251 0.2364 0.4582 0.058 Uiso 1 1 calc R U . . .
C4 C 0.1782(4) 0.2217(5) 0.4012(3) 0.0493(18) Uani 1 1 d . U . . .
H4 H 0.1271 0.1929 0.4102 0.059 Uiso 1 1 calc R U . . .
C5 C 0.1944(4) 0.2374(4) 0.3597(3) 0.0438(16) Uani 1 1 d . U . . .
H5 H 0.1538 0.2186 0.3405 0.053 Uiso 1 1 calc R U . . .
C6 C 0.2691(4) 0.2805(4) 0.3446(2) 0.0339(14) Uani 1 1 d . U . . .
C7 C 0.2799(4) 0.2959(4) 0.2997(2) 0.0359(14) Uani 1 1 d . U . . .
C8 C 0.2380(5) 0.3246(5) 0.2796(3) 0.0521(18) Uani 1 1 d . U . . .
H8 H 0.2066 0.3366 0.2958 0.063 Uiso 1 1 calc R U . . .
C9 C 0.2410(6) 0.3358(6) 0.2372(3) 0.059(2) Uani 1 1 d . U . . .
H9 H 0.2123 0.3555 0.2248 0.071 Uiso 1 1 calc R U . . .
C10 C 0.2853(6) 0.3185(6) 0.2134(3) 0.059(2) Uani 1 1 d . U . . .
H10 H 0.2863 0.3246 0.1841 0.070 Uiso 1 1 calc R U . . .
C11 C 0.3288(5) 0.2919(5) 0.2319(3) 0.0482(17) Uani 1 1 d . U . . .
H11 H 0.3599 0.2803 0.2150 0.058 Uiso 1 1 calc R U . . .
C12 C 0.3279(4) 0.2819(4) 0.2748(3) 0.0384(15) Uani 1 1 d . U . . .
O2 O 0.3724(3) 0.2572(3) 0.29152(16) 0.0369(11) Uani 1 1 d . . . . .
O3 O 0.4772(3) 0.2168(3) 0.2876(2) 0.0520(15) Uani 1 1 d . U . . .
C13 C 0.4892(12) 0.2251(11) 0.2429(7) 0.144(7) Uani 1 1 d . U . . .
H13A H 0.4593 0.1757 0.2295 0.216 Uiso 1 1 calc R U . . .
H13B H 0.5430 0.2452 0.2369 0.216 Uiso 1 1 calc R U . . .
H13C H 0.4734 0.2600 0.2322 0.216 Uiso 1 1 calc R U . . .
N1 N 0.3280(15) 0.1253(12) 0.2250(10) 0.072(5) Uani 0.431(15) 1 d D U P A 1
C14 C 0.2711(16) 0.1097(18) 0.2087(9) 0.094(5) Uani 0.431(15) 1 d D U P A 1
C15 C 0.2095(19) 0.097(3) 0.1789(12) 0.140(12) Uani 0.431(15) 1 d D U P A 1
H15A H 0.2369 0.1310 0.1568 0.211 Uiso 0.431(15) 1 d R U P A 1
H15B H 0.1717 0.1072 0.1893 0.211 Uiso 0.431(15) 1 d R U P A 1
H15C H 0.1855 0.0456 0.1687 0.211 Uiso 0.431(15) 1 d R U P A 1
N1' N 0.3169(13) 0.1183(9) 0.2338(8) 0.072(4) Uani 0.569(15) 1 d D U P A 2
C14' C 0.2724(12) 0.0602(10) 0.2210(7) 0.093(4) Uani 0.569(15) 1 d D U P A 2
C15' C 0.2099(13) -0.0012(12) 0.1977(8) 0.111(7) Uani 0.569(15) 1 d D U P A 2
H15D H 0.1762 0.0126 0.1847 0.166 Uiso 0.569(15) 1 d R U P A 2
H15E H 0.1826 -0.0402 0.2178 0.166 Uiso 0.569(15) 1 d R U P A 2
H15F H 0.2308 -0.0194 0.1770 0.166 Uiso 0.569(15) 1 d R U P A 2
N2 N 0.2595(2) 0.0982(3) 0.32274(16) 0.0491(18) Uani 1 1 d G . . . .
C16 C 0.1881(3) 0.0587(3) 0.30481(18) 0.084(3) Uani 1 1 d G U . . .
H16 H 0.1830 0.0563 0.2755 0.100 Uiso 1 1 calc R U . . .
C17 C 0.1242(2) 0.0226(3) 0.3298(3) 0.088(3) Uani 1 1 d G U . . .
H17 H 0.0754 -0.0044 0.3175 0.106 Uiso 1 1 calc R U . . .
C18 C 0.1317(3) 0.0261(4) 0.3727(3) 0.089(3) Uani 1 1 d G U . . .
H18 H 0.0880 0.0015 0.3898 0.106 Uiso 1 1 calc R U . . .
C19 C 0.2030(4) 0.0656(4) 0.39067(17) 0.076(2) Uani 1 1 d DG U . . .
C20 C 0.2669(3) 0.1017(3) 0.36567(17) 0.0549(19) Uani 1 1 d G U . . .
C21 C 0.3399(6) 0.1447(5) 0.3801(2) 0.0538(19) Uani 1 1 d D U . . .
C22 C 0.3475(4) 0.1482(5) 0.4223(3) 0.080(3) Uani 1 1 d D U . . .
C23 C 0.2825(6) 0.1114(6) 0.4486(4) 0.099(3) Uani 1 1 d D U . . .
H23 H 0.2893 0.1160 0.4778 0.118 Uiso 1 1 calc R U . . .
C24 C 0.2098(5) 0.0691(6) 0.4327(2) 0.094(3) Uani 1 1 d D U . . .
O4 O 0.3985(3) 0.1794(3) 0.35504(17) 0.0411(12) Uani 1 1 d . . . . .
Cl1 Cl 0.1402(6) 0.0181(5) 0.4702(3) 0.060(2) Uani 0.3333 1 d D U P B 1
Cl1' Cl 0.1108(6) 0.0194(6) 0.4513(4) 0.102(4) Uani 0.3333 1 d D U P B 2
Cl12 Cl 0.1676(8) 0.0577(10) 0.4810(3) 0.106(4) Uani 0.3333 1 d D U P B 3
Cl2 Cl 0.4529(4) 0.2094(4) 0.43681(15) 0.0715(12) Uani 0.5 1 d D U P C 1
Cl2' Cl 0.4196(4) 0.1960(4) 0.45235(14) 0.0715(12) Uani 0.5 1 d D U P C 2
O5 O 0.6057(5) 0.3748(5) 0.3184(3) 0.0292(19) Uani 0.5 1 d . U P D 1
H51 H 0.5975 0.3804 0.2936 0.044 Uiso 0.5 1 d R U P D 1
O5' O 0.5917(5) 0.3845(5) 0.2892(4) 0.035(2) Uani 0.5 1 d . . P D 2
H52 H 0.5807 0.3883 0.2650 0.053 Uiso 0.5 1 d R U P D 2
Cl3 Cl 0.6262(7) 0.3092(6) 0.2201(3) 0.0220(19) Uani 0.1333 1 d . U P E 1
Cl3' Cl 0.6667 0.3333 0.2375(9) 0.0220(19) Uani 0.1 3 d S TU P D 2
Cl4 Cl 0.091(3) 0.115(3) 0.2349(17) 0.200(14) Uani 0.1667 1 d . U P F 1
Cl4' Cl 0.120(3) 0.126(3) 0.2032(16) 0.198(14) Uani 0.1667 1 d . U P G 2
 
loop_
 _atom_site_aniso_label
 _atom_site_aniso_U_11
 _atom_site_aniso_U_22
 _atom_site_aniso_U_33
 _atom_site_aniso_U_23
 _atom_site_aniso_U_13
 _atom_site_aniso_U_12
Dy1 0.0169(2) 0.01811(19) 0.0982(4) -0.00224(16) -0.00106(16) 0.00881(14)
Dy2 0.0197(3) 0.0197(3) 0.0605(7) 0.000 0.000 0.00986(17)
Ni1 0.0319(5) 0.0240(5) 0.0610(6) 0.0003(4) 0.0001(4) 0.0168(4)
O1 0.020(2) 0.030(3) 0.062(3) -0.001(2) 0.000(2) 0.009(2)
C1 0.027(3) 0.021(3) 0.061(4) 0.002(3) 0.003(3) 0.014(3)
C2 0.032(3) 0.037(4) 0.062(4) 0.003(3) 0.000(3) 0.017(3)
C3 0.035(4) 0.042(4) 0.065(4) 0.004(3) 0.010(3) 0.018(3)
C4 0.028(3) 0.040(4) 0.078(5) -0.002(3) 0.012(3) 0.016(3)
C5 0.026(3) 0.035(3) 0.072(4) -0.005(3) -0.002(3) 0.017(3)
C6 0.025(3) 0.022(3) 0.063(4) -0.005(3) -0.005(3) 0.018(2)
C7 0.029(3) 0.030(3) 0.055(4) -0.007(3) -0.007(3) 0.019(3)
C8 0.050(4) 0.055(4) 0.068(4) -0.006(4) -0.010(4) 0.039(3)
C9 0.066(5) 0.066(5) 0.068(5) -0.003(4) -0.013(4) 0.049(4)
C10 0.068(5) 0.059(4) 0.064(5) -0.004(4) -0.009(4) 0.043(4)
C11 0.048(4) 0.043(4) 0.060(4) -0.005(3) 0.000(3) 0.028(3)
C12 0.031(3) 0.026(3) 0.062(4) -0.004(3) -0.003(3) 0.017(3)
O2 0.026(2) 0.029(2) 0.060(3) 0.001(2) 0.000(2) 0.017(2)
O3 0.034(3) 0.031(3) 0.095(4) 0.011(3) 0.021(3) 0.020(2)
C13 0.150(14) 0.131(12) 0.184(12) 0.011(11) 0.037(12) 0.095(11)
N1 0.103(7) 0.052(5) 0.087(8) -0.004(5) -0.008(6) 0.059(5)
C14 0.117(8) 0.067(6) 0.100(8) -0.005(6) -0.005(7) 0.048(7)
C15 0.138(19) 0.115(18) 0.126(18) -0.003(16) -0.007(17) 0.031(17)
N1' 0.099(7) 0.051(5) 0.090(7) -0.011(5) -0.013(5) 0.057(5)
C14' 0.116(8) 0.069(6) 0.099(8) -0.003(6) -0.006(7) 0.049(6)
C15' 0.127(13) 0.086(11) 0.102(12) -0.013(10) -0.012(11) 0.041(11)
N2 0.028(3) 0.025(3) 0.096(6) -0.004(3) -0.008(3) 0.014(3)
C16 0.031(4) 0.044(5) 0.173(9) -0.013(6) -0.019(5) 0.016(4)
C17 0.033(4) 0.044(4) 0.186(8) 0.000(6) -0.004(5) 0.018(4)
C18 0.055(5) 0.047(4) 0.172(8) 0.020(5) 0.029(6) 0.031(4)
C19 0.080(5) 0.048(4) 0.121(6) 0.024(4) 0.037(5) 0.046(4)
C20 0.062(4) 0.039(4) 0.083(5) 0.015(4) 0.019(4) 0.039(3)
C21 0.081(5) 0.044(4) 0.058(4) 0.009(3) 0.011(4) 0.048(4)
C22 0.129(7) 0.062(5) 0.071(5) 0.007(4) 0.004(5) 0.064(5)
C23 0.159(8) 0.070(6) 0.081(6) 0.012(5) 0.032(6) 0.067(6)
C24 0.127(7) 0.067(5) 0.106(6) 0.021(5) 0.055(6) 0.062(5)
O4 0.038(3) 0.027(3) 0.060(3) -0.008(2) -0.018(2) 0.017(2)
Cl1 0.103(7) 0.053(4) 0.042(4) 0.010(4) 0.015(4) 0.052(5)
Cl1' 0.116(8) 0.058(5) 0.100(7) -0.003(5) 0.075(6) 0.019(5)
Cl12 0.098(7) 0.143(9) 0.094(7) 0.041(7) 0.033(6) 0.073(7)
Cl2 0.107(4) 0.083(3) 0.029(2) -0.007(2) -0.0017(18) 0.052(3)
Cl2' 0.107(4) 0.083(3) 0.029(2) -0.007(2) -0.0017(18) 0.052(3)
O5 0.022(4) 0.024(4) 0.046(5) -0.001(4) 0.004(4) 0.014(4)
O5' 0.023(5) 0.028(5) 0.056(6) 0.002(5) -0.004(4) 0.012(4)
Cl3 0.036(5) 0.013(4) 0.021(4) -0.004(3) -0.006(4) 0.015(4)
Cl3' 0.036(5) 0.013(4) 0.021(4) -0.004(3) -0.006(4) 0.015(4)
Cl4 0.201(18) 0.211(18) 0.202(19) 0.006(14) -0.004(14) 0.114(14)
Cl4' 0.200(18) 0.207(18) 0.197(19) 0.013(14) -0.004(14) 0.108(14)
 
_geom_special_details
;
 All esds (except the esd in the dihedral angle between two l.s. planes)
 are estimated using the full covariance matrix.  The cell esds are taken
 into account individually in the estimation of esds in distances, angles
 and torsion angles; correlations between esds in cell parameters are only
 used when they are defined by crystal symmetry.  An approximate (isotropic)
 treatment of cell esds is used for estimating esds involving l.s. planes.
;
 
loop_
 _geom_bond_atom_site_label_1
 _geom_bond_atom_site_label_2
 _geom_bond_distance
 _geom_bond_site_symmetry_2
 _geom_bond_publ_flag
Dy1 O2 2.250(5) . ?
Dy1 O1 2.251(5) . ?
Dy1 O5 2.322(8) . ?
Dy1 O3 2.340(6) 17 ?
Dy1 O5 2.343(9) 18_545 ?
Dy1 O3 2.386(6) . ?
Dy1 O4 2.451(5) . ?
Dy1 O5' 2.475(10) . ?
Dy1 O5' 2.533(10) 18_545 ?
Dy1 O4 2.592(5) 17 ?
Dy1 Ni1 3.1578(10) . ?
Dy1 Ni1 3.2016(10) 17 ?
Dy1 H51 2.4715 . ?
Dy2 O5 1.896(9) 2_655 ?
Dy2 O5 1.896(9) 3_665 ?
Dy2 O5 1.896(9) . ?
Dy2 Dy2 2.010(3) 16_655 ?
Dy2 Cl3' 2.09(3) . ?
Dy2 O5' 2.282(10) 3_665 ?
Dy2 O5' 2.282(10) 2_655 ?
Dy2 O5' 2.282(9) . ?
Dy2 O5 2.351(10) 17 ?
Dy2 O5 2.351(10) 18_545 ?
Dy2 O5 2.351(10) 16_655 ?
Dy2 Cl3 2.741(10) 2_655 ?
Dy2 H51 2.0854 . ?
Ni1 N2 2.037(4) . ?
Ni1 O2 2.057(5) . ?
Ni1 O3 2.061(5) . ?
Ni1 O1 2.069(5) 18_545 ?
Ni1 N1' 2.08(2) . ?
Ni1 O4 2.106(5) . ?
Ni1 N1 2.29(3) . ?
Ni1 Dy1 3.2017(10) 18_545 ?
O1 C1 1.348(9) . ?
O1 Ni1 2.069(5) 17 ?
C1 C2 1.385(11) . ?
C1 C6 1.407(10) . ?
C2 C3 1.385(11) . ?
C2 H2 0.9500 . ?
C3 C4 1.368(12) . ?
C3 H3 0.9500 . ?
C4 C5 1.377(13) . ?
C4 H4 0.9500 . ?
C5 C6 1.412(10) . ?
C5 H5 0.9500 . ?
C6 C7 1.474(11) . ?
C7 C12 1.402(10) . ?
C7 C8 1.412(11) . ?
C8 C9 1.382(13) . ?
C8 H8 0.9500 . ?
C9 C10 1.361(13) . ?
C9 H9 0.9500 . ?
C10 C11 1.385(12) . ?
C10 H10 0.9500 . ?
C11 C12 1.400(12) . ?
C11 H11 0.9500 . ?
C12 O2 1.351(9) . ?
O3 C13 1.46(2) . ?
O3 Dy1 2.340(6) 18_545 ?
C13 H13A 0.9800 . ?
C13 H13B 0.9800 . ?
C13 H13C 0.9800 . ?
N1 C14 1.165(9) . ?
C14 C15 1.495(9) . ?
C15 H15A 0.9600 . ?
C15 H15B 0.9600 . ?
C15 H15C 0.9600 . ?
N1' C14' 1.150(10) . ?
C14' C15' 1.471(10) . ?
C15' H15D 0.9600 . ?
C15' H15E 0.9600 . ?
C15' H15F 0.9600 . ?
N2 C16 1.3900 . ?
N2 C20 1.3900 . ?
C16 C17 1.3900 . ?
C16 H16 0.9500 . ?
C17 C18 1.3900 . ?
C17 H17 0.9500 . ?
C18 C19 1.3900 . ?
C18 H18 0.9500 . ?
C19 C24 1.360(8) . ?
C19 C20 1.3900 . ?
C20 C21 1.377(11) . ?
C21 O4 1.319(11) . ?
C21 C22 1.367(8) . ?
C22 C23 1.430(9) . ?
C22 Cl2' 1.619(8) . ?
C22 Cl2 1.929(8) . ?
C23 C24 1.389(9) . ?
C23 H23 0.9500 . ?
C24 Cl12 1.739(9) . ?
C24 Cl1 1.757(9) . ?
C24 Cl1' 1.851(9) . ?
O4 Dy1 2.592(5) 18_545 ?
O5 Dy1 2.342(9) 17 ?
O5 Dy2 2.351(10) 16_655 ?
O5 H51 0.8360 . ?
O5' Dy1 2.533(10) 17 ?
O5' H52 0.8241 . ?
Cl3 Cl3 1.25(2) 3_665 ?
Cl3 Cl3 1.25(2) 2_655 ?
 
loop_
 _geom_angle_atom_site_label_1
 _geom_angle_atom_site_label_2
 _geom_angle_atom_site_label_3
 _geom_angle
 _geom_angle_site_symmetry_1
 _geom_angle_site_symmetry_3
 _geom_angle_publ_flag
O2 Dy1 O1 77.15(18) . . ?
O2 Dy1 O5 134.4(3) . . ?
O1 Dy1 O5 132.0(3) . . ?
O2 Dy1 O3 146.69(18) . 17 ?
O1 Dy1 O3 72.26(19) . 17 ?
O5 Dy1 O3 64.8(3) . 17 ?
O2 Dy1 O5 131.7(2) . 18_545 ?
O1 Dy1 O5 140.1(3) . 18_545 ?
O5 Dy1 O5 52.4(4) . 18_545 ?
O3 Dy1 O5 81.4(3) 17 18_545 ?
O2 Dy1 O3 69.71(19) . . ?
O1 Dy1 O3 143.63(18) . . ?
O5 Dy1 O3 83.4(3) . . ?
O3 Dy1 O3 143.1(3) 17 . ?
O5 Dy1 O3 63.8(3) 18_545 . ?
O2 Dy1 O4 73.00(17) . . ?
O1 Dy1 O4 92.19(18) . . ?
O5 Dy1 O4 127.4(3) . . ?
O3 Dy1 O4 120.43(19) 17 . ?
O5 Dy1 O4 75.8(3) 18_545 . ?
O3 Dy1 O4 64.44(19) . . ?
O2 Dy1 O5' 110.9(3) . . ?
O1 Dy1 O5' 130.3(3) . . ?
O3 Dy1 O5' 80.5(3) 17 . ?
O3 Dy1 O5' 77.1(3) . . ?
O4 Dy1 O5' 137.5(3) . . ?
O2 Dy1 O5' 133.9(2) . 18_545 ?
O1 Dy1 O5' 117.1(3) . 18_545 ?
O3 Dy1 O5' 73.7(3) 17 18_545 ?
O3 Dy1 O5' 78.4(3) . 18_545 ?
O4 Dy1 O5' 63.3(2) . 18_545 ?
O5' Dy1 O5' 92.7(5) . 18_545 ?
O2 Dy1 O4 93.99(17) . 17 ?
O1 Dy1 O4 68.53(16) . 17 ?
O5 Dy1 O4 73.4(3) . 17 ?
O3 Dy1 O4 62.82(18) 17 17 ?
O5 Dy1 O4 124.2(2) 18_545 17 ?
O3 Dy1 O4 127.19(19) . 17 ?
O4 Dy1 O4 159.05(18) . 17 ?
O5' Dy1 O4 62.1(2) . 17 ?
O5' Dy1 O4 132.1(2) 18_545 17 ?
O2 Dy1 Ni1 40.52(12) . . ?
O1 Dy1 Ni1 103.23(13) . . ?
O5 Dy1 Ni1 124.1(2) . . ?
O3 Dy1 Ni1 162.15(15) 17 . ?
O5 Dy1 Ni1 92.7(2) 18_545 . ?
O3 Dy1 Ni1 40.75(13) . . ?
O4 Dy1 Ni1 41.77(12) . . ?
O5' Dy1 Ni1 113.7(2) . . ?
O5' Dy1 Ni1 94.1(2) 18_545 . ?
O4 Dy1 Ni1 132.56(12) 17 . ?
O2 Dy1 Ni1 106.78(12) . 17 ?
O1 Dy1 Ni1 40.03(12) . 17 ?
O5 Dy1 Ni1 92.0(2) . 17 ?
O3 Dy1 Ni1 40.00(13) 17 17 ?
O5 Dy1 Ni1 121.4(2) 18_545 17 ?
O3 Dy1 Ni1 168.11(15) . 17 ?
O4 Dy1 Ni1 126.22(13) . 17 ?
O5' Dy1 Ni1 94.2(2) . 17 ?
O5' Dy1 Ni1 110.4(2) 18_545 17 ?
O4 Dy1 Ni1 40.96(12) 17 17 ?
Ni1 Dy1 Ni1 142.04(3) . 17 ?
O2 Dy1 H51 115.1 . . ?
O1 Dy1 H51 133.3 . . ?
O5 Dy1 H51 19.8 . . ?
O3 Dy1 H51 78.6 17 . ?
O5 Dy1 H51 66.2 18_545 . ?
O3 Dy1 H51 76.4 . . ?
O4 Dy1 H51 134.4 . . ?
O4 Dy1 H51 65.8 17 . ?
Ni1 Dy1 H51 114.5 . . ?
Ni1 Dy1 H51 95.7 17 . ?
O5 Dy2 O5 112.7(3) 2_655 3_665 ?
O5 Dy2 O5 112.7(3) 2_655 . ?
O5 Dy2 O5 112.7(3) 3_665 . ?
O5 Dy2 Dy2 73.9(3) 2_655 16_655 ?
O5 Dy2 Dy2 73.9(3) 3_665 16_655 ?
O5 Dy2 Dy2 73.9(3) . 16_655 ?
Dy2 Dy2 Cl3' 180.0 16_655 . ?
Dy2 Dy2 O5' 100.6(3) 16_655 3_665 ?
Cl3' Dy2 O5' 79.4(3) . 3_665 ?
Dy2 Dy2 O5' 100.6(3) 16_655 2_655 ?
Cl3' Dy2 O5' 79.4(3) . 2_655 ?
O5' Dy2 O5' 116.71(18) 3_665 2_655 ?
Dy2 Dy2 O5' 100.6(3) 16_655 . ?
Cl3' Dy2 O5' 79.4(3) . . ?
O5' Dy2 O5' 116.71(18) 3_665 . ?
O5' Dy2 O5' 116.71(18) 2_655 . ?
O5 Dy2 O5 124.8(3) 2_655 17 ?
O5 Dy2 O5 56.8(2) 3_665 17 ?
O5 Dy2 O5 56.8(2) . 17 ?
Dy2 Dy2 O5 50.8(2) 16_655 17 ?
O5 Dy2 O5 56.8(2) 2_655 18_545 ?
O5 Dy2 O5 124.8(3) 3_665 18_545 ?
O5 Dy2 O5 56.8(2) . 18_545 ?
Dy2 Dy2 O5 50.8(2) 16_655 18_545 ?
O5 Dy2 O5 84.3(3) 17 18_545 ?
O5 Dy2 O5 56.8(2) 2_655 16_655 ?
O5 Dy2 O5 56.8(2) 3_665 16_655 ?
O5 Dy2 O5 124.8(3) . 16_655 ?
Dy2 Dy2 O5 50.8(2) 16_655 16_655 ?
O5 Dy2 O5 84.3(3) 17 16_655 ?
O5 Dy2 O5 84.3(3) 18_545 16_655 ?
O5 Dy2 Cl3 98.1(4) 2_655 2_655 ?
O5 Dy2 Cl3 98.1(4) 3_665 2_655 ?
O5 Dy2 Cl3 121.3(4) . 2_655 ?
Dy2 Dy2 Cl3 164.8(3) 16_655 2_655 ?
O5 Dy2 Cl3 135.3(3) 17 2_655 ?
O5 Dy2 Cl3 135.4(3) 18_545 2_655 ?
O5 Dy2 Cl3 114.0(3) 16_655 2_655 ?
O5 Dy2 H51 120.9 2_655 . ?
O5 Dy2 H51 120.8 3_665 . ?
O5 Dy2 H51 23.6 . . ?
Dy2 Dy2 H51 97.6 16_655 . ?
O5 Dy2 H51 72.5 17 . ?
O5 Dy2 H51 72.5 18_545 . ?
O5 Dy2 H51 148.4 16_655 . ?
Cl3 Dy2 H51 97.7 2_655 . ?
N2 Ni1 O2 96.87(19) . . ?
N2 Ni1 O3 157.1(3) . . ?
O2 Ni1 O3 80.2(2) . . ?
N2 Ni1 O1 95.9(2) . 18_545 ?
O2 Ni1 O1 159.7(2) . 18_545 ?
O3 Ni1 O1 81.9(2) . 18_545 ?
N2 Ni1 N1' 95.3(7) . . ?
O2 Ni1 N1' 96.7(6) . . ?
O3 Ni1 N1' 107.6(7) . . ?
O1 Ni1 N1' 97.7(7) 18_545 . ?
N2 Ni1 O4 80.6(2) . . ?
O2 Ni1 O4 84.6(2) . . ?
O3 Ni1 O4 76.5(3) . . ?
O1 Ni1 O4 82.1(2) 18_545 . ?
N1' Ni1 O4 175.9(7) . . ?
N2 Ni1 N1 102.7(8) . . ?
O2 Ni1 N1 94.7(7) . . ?
O3 Ni1 N1 100.2(8) . . ?
O1 Ni1 N1 97.8(8) 18_545 . ?
O4 Ni1 N1 176.7(8) . . ?
N2 Ni1 Dy1 113.74(15) . . ?
O2 Ni1 Dy1 45.28(14) . . ?
O3 Ni1 Dy1 49.08(17) . . ?
O1 Ni1 Dy1 114.80(14) 18_545 . ?
N1' Ni1 Dy1 132.3(5) . . ?
O4 Ni1 Dy1 50.83(14) . . ?
N1 Ni1 Dy1 126.8(6) . . ?
N2 Ni1 Dy1 117.79(15) . 18_545 ?
O2 Ni1 Dy1 115.39(14) . 18_545 ?
O3 Ni1 Dy1 46.87(17) . 18_545 ?
O1 Ni1 Dy1 44.41(14) 18_545 18_545 ?
N1' Ni1 Dy1 128.5(8) . 18_545 ?
O4 Ni1 Dy1 53.78(15) . 18_545 ?
N1 Ni1 Dy1 124.1(9) . 18_545 ?
Dy1 Ni1 Dy1 70.52(2) . 18_545 ?
C1 O1 Ni1 132.6(4) . 17 ?
C1 O1 Dy1 131.6(4) . . ?
Ni1 O1 Dy1 95.56(19) 17 . ?
O1 C1 C2 119.0(7) . . ?
O1 C1 C6 121.2(7) . . ?
C2 C1 C6 119.9(7) . . ?
C3 C2 C1 121.9(8) . . ?
C3 C2 H2 119.1 . . ?
C1 C2 H2 119.1 . . ?
C4 C3 C2 119.2(8) . . ?
C4 C3 H3 120.4 . . ?
C2 C3 H3 120.4 . . ?
C3 C4 C5 119.8(7) . . ?
C3 C4 H4 120.1 . . ?
C5 C4 H4 120.1 . . ?
C4 C5 C6 122.7(8) . . ?
C4 C5 H5 118.7 . . ?
C6 C5 H5 118.7 . . ?
C1 C6 C5 116.5(7) . . ?
C1 C6 C7 125.4(6) . . ?
C5 C6 C7 118.1(7) . . ?
C12 C7 C8 116.9(7) . . ?
C12 C7 C6 124.2(6) . . ?
C8 C7 C6 118.9(7) . . ?
C9 C8 C7 122.4(8) . . ?
C9 C8 H8 118.8 . . ?
C7 C8 H8 118.8 . . ?
C10 C9 C8 119.7(8) . . ?
C10 C9 H9 120.1 . . ?
C8 C9 H9 120.1 . . ?
C9 C10 C11 119.9(9) . . ?
C9 C10 H10 120.1 . . ?
C11 C10 H10 120.1 . . ?
C10 C11 C12 121.3(8) . . ?
C10 C11 H11 119.4 . . ?
C12 C11 H11 119.4 . . ?
O2 C12 C11 119.1(7) . . ?
O2 C12 C7 121.2(7) . . ?
C11 C12 C7 119.7(7) . . ?
C12 O2 Ni1 131.4(4) . . ?
C12 O2 Dy1 134.2(4) . . ?
Ni1 O2 Dy1 94.20(19) . . ?
C13 O3 Ni1 103.5(9) . . ?
C13 O3 Dy1 130.1(8) . 18_545 ?
Ni1 O3 Dy1 93.1(2) . 18_545 ?
C13 O3 Dy1 124.2(8) . . ?
Ni1 O3 Dy1 90.2(2) . . ?
Dy1 O3 Dy1 101.9(3) 18_545 . ?
O3 C13 H13A 109.5 . . ?
O3 C13 H13B 109.5 . . ?
H13A C13 H13B 109.5 . . ?
O3 C13 H13C 109.5 . . ?
H13A C13 H13C 109.5 . . ?
H13B C13 H13C 109.5 . . ?
C14 N1 Ni1 130(3) . . ?
N1 C14 C15 167(4) . . ?
C14 C15 H15A 102.4 . . ?
C14 C15 H15B 115.9 . . ?
H15A C15 H15B 109.5 . . ?
C14 C15 H15C 109.9 . . ?
H15A C15 H15C 109.5 . . ?
H15B C15 H15C 109.5 . . ?
C14' N1' Ni1 131(2) . . ?
N1' C14' C15' 164(3) . . ?
C14' C15' H15D 114.6 . . ?
C14' C15' H15E 104.9 . . ?
H15D C15' H15E 109.5 . . ?
C14' C15' H15F 108.7 . . ?
H15D C15' H15F 109.5 . . ?
H15E C15' H15F 109.5 . . ?
C16 N2 C20 120.0 . . ?
C16 N2 Ni1 127.6(3) . . ?
C20 N2 Ni1 112.4(3) . . ?
C17 C16 N2 120.0 . . ?
C17 C16 H16 120.0 . . ?
N2 C16 H16 120.0 . . ?
C16 C17 C18 120.0 . . ?
C16 C17 H17 120.0 . . ?
C18 C17 H17 120.0 . . ?
C17 C18 C19 120.0 . . ?
C17 C18 H18 120.0 . . ?
C19 C18 H18 120.0 . . ?
C24 C19 C20 120.4(6) . . ?
C24 C19 C18 119.6(6) . . ?
C20 C19 C18 120.0 . . ?
C21 C20 C19 124.8(5) . . ?
C21 C20 N2 115.1(5) . . ?
C19 C20 N2 120.0 . . ?
O4 C21 C22 122.2(9) . . ?
O4 C21 C20 122.5(7) . . ?
C22 C21 C20 115.3(8) . . ?
C21 C22 C23 120.7(8) . . ?
C21 C22 Cl2' 132.2(8) . . ?
C23 C22 Cl2' 106.7(7) . . ?
C21 C22 Cl2 109.6(7) . . ?
C23 C22 Cl2 129.6(7) . . ?
C24 C23 C22 122.0(9) . . ?
C24 C23 H23 119.0 . . ?
C22 C23 H23 119.0 . . ?
C19 C24 C23 116.7(8) . . ?
C19 C24 Cl12 148.7(9) . . ?
C23 C24 Cl12 93.3(8) . . ?
C19 C24 Cl1 128.5(8) . . ?
C23 C24 Cl1 114.3(8) . . ?
C19 C24 Cl1' 103.8(7) . . ?
C23 C24 Cl1' 139.1(8) . . ?
C21 O4 Ni1 109.0(5) . . ?
C21 O4 Dy1 134.0(5) . . ?
Ni1 O4 Dy1 87.39(19) . . ?
C21 O4 Dy1 129.5(4) . 18_545 ?
Ni1 O4 Dy1 85.26(19) . 18_545 ?
Dy1 O4 Dy1 93.41(19) . 18_545 ?
Dy2 O5 Dy1 127.7(4) . . ?
Dy2 O5 Dy1 128.3(4) . 17 ?
Dy1 O5 Dy1 103.8(3) . 17 ?
Dy2 O5 Dy2 55.2(3) . 16_655 ?
Dy1 O5 Dy2 109.7(4) . 16_655 ?
Dy1 O5 Dy2 107.8(4) 17 16_655 ?
Dy2 O5 H51 91.0 . . ?
Dy1 O5 H51 90.2 . . ?
Dy1 O5 H51 92.8 17 . ?
Dy2 O5 H51 146.2 16_655 . ?
Dy2 O5' Dy1 105.6(4) . . ?
Dy2 O5' Dy1 104.9(4) . 17 ?
Dy1 O5' Dy1 94.3(4) . 17 ?
Dy2 O5' H52 119.5 . . ?
Dy1 O5' H52 111.1 . . ?
Dy1 O5' H52 118.0 17 . ?
Cl3 Cl3 Cl3 60.000(4) 3_665 2_655 ?
Cl3 Cl3 Dy2 76.8(2) 3_665 . ?
Cl3 Cl3 Dy2 76.8(2) 2_655 . ?
 
loop_
 _geom_torsion_atom_site_label_1
 _geom_torsion_atom_site_label_2
 _geom_torsion_atom_site_label_3
 _geom_torsion_atom_site_label_4
 _geom_torsion
 _geom_torsion_site_symmetry_1
 _geom_torsion_site_symmetry_2
 _geom_torsion_site_symmetry_3
 _geom_torsion_site_symmetry_4
 _geom_torsion_publ_flag
Ni1 O1 C1 C2 -66.7(9) 17 . . . ?
Dy1 O1 C1 C2 105.8(7) . . . . ?
Ni1 O1 C1 C6 113.9(7) 17 . . . ?
Dy1 O1 C1 C6 -73.5(8) . . . . ?
O1 C1 C2 C3 -177.4(7) . . . . ?
C6 C1 C2 C3 1.9(11) . . . . ?
C1 C2 C3 C4 -1.8(12) . . . . ?
C2 C3 C4 C5 1.0(13) . . . . ?
C3 C4 C5 C6 -0.5(12) . . . . ?
O1 C1 C6 C5 178.0(6) . . . . ?
C2 C1 C6 C5 -1.3(10) . . . . ?
O1 C1 C6 C7 -3.3(10) . . . . ?
C2 C1 C6 C7 177.3(7) . . . . ?
C4 C5 C6 C1 0.6(11) . . . . ?
C4 C5 C6 C7 -178.1(7) . . . . ?
C1 C6 C7 C12 53.0(10) . . . . ?
C5 C6 C7 C12 -128.4(8) . . . . ?
C1 C6 C7 C8 -129.0(8) . . . . ?
C5 C6 C7 C8 49.6(10) . . . . ?
C12 C7 C8 C9 2.6(13) . . . . ?
C6 C7 C8 C9 -175.6(8) . . . . ?
C7 C8 C9 C10 0.4(15) . . . . ?
C8 C9 C10 C11 -2.0(15) . . . . ?
C9 C10 C11 C12 0.5(15) . . . . ?
C10 C11 C12 O2 -178.8(8) . . . . ?
C10 C11 C12 C7 2.6(12) . . . . ?
C8 C7 C12 O2 177.4(7) . . . . ?
C6 C7 C12 O2 -4.5(11) . . . . ?
C8 C7 C12 C11 -4.0(11) . . . . ?
C6 C7 C12 C11 174.0(7) . . . . ?
C11 C12 O2 Ni1 -76.4(9) . . . . ?
C7 C12 O2 Ni1 102.2(7) . . . . ?
C11 C12 O2 Dy1 110.5(7) . . . . ?
C7 C12 O2 Dy1 -71.0(9) . . . . ?
Ni1 N1 C14 C15 156(14) . . . . ?
Ni1 N1' C14' C15' 145(10) . . . . ?
C20 N2 C16 C17 0.0 . . . . ?
Ni1 N2 C16 C17 177.1(4) . . . . ?
N2 C16 C17 C18 0.0 . . . . ?
C16 C17 C18 C19 0.0 . . . . ?
C17 C18 C19 C24 179.7(8) . . . . ?
C17 C18 C19 C20 0.0 . . . . ?
C24 C19 C20 C21 -2.4(8) . . . . ?
C18 C19 C20 C21 177.3(6) . . . . ?
C24 C19 C20 N2 -179.7(8) . . . . ?
C18 C19 C20 N2 0.0 . . . . ?
C16 N2 C20 C21 -177.6(6) . . . . ?
Ni1 N2 C20 C21 4.9(5) . . . . ?
C16 N2 C20 C19 0.0 . . . . ?
Ni1 N2 C20 C19 -177.5(3) . . . . ?
C19 C20 C21 O4 -178.2(5) . . . . ?
N2 C20 C21 O4 -0.8(9) . . . . ?
C19 C20 C21 C22 2.7(10) . . . . ?
N2 C20 C21 C22 -179.9(6) . . . . ?
O4 C21 C22 C23 178.5(9) . . . . ?
C20 C21 C22 C23 -2.3(13) . . . . ?
O4 C21 C22 Cl2' 6.3(15) . . . . ?
C20 C21 C22 Cl2' -174.5(8) . . . . ?
O4 C21 C22 Cl2 0.1(11) . . . . ?
C20 C21 C22 Cl2 179.2(6) . . . . ?
C21 C22 C23 C24 1.9(18) . . . . ?
Cl2' C22 C23 C24 175.9(11) . . . . ?
Cl2 C22 C23 C24 180.0(10) . . . . ?
C20 C19 C24 C23 1.6(14) . . . . ?
C18 C19 C24 C23 -178.1(8) . . . . ?
C20 C19 C24 Cl12 163.3(17) . . . . ?
C18 C19 C24 Cl12 -16(2) . . . . ?
C20 C19 C24 Cl1 -170.1(7) . . . . ?
C18 C19 C24 Cl1 10.2(13) . . . . ?
C20 C19 C24 Cl1' 176.1(5) . . . . ?
C18 C19 C24 Cl1' -3.6(10) . . . . ?
C22 C23 C24 C19 -1.5(18) . . . . ?
C22 C23 C24 Cl12 -172.0(11) . . . . ?
C22 C23 C24 Cl1 171.4(9) . . . . ?
C22 C23 C24 Cl1' -173.3(12) . . . . ?
C22 C21 O4 Ni1 175.5(7) . . . . ?
C20 C21 O4 Ni1 -3.6(8) . . . . ?
C22 C21 O4 Dy1 -79.0(10) . . . . ?
C20 C21 O4 Dy1 101.8(8) . . . . ?
C22 C21 O4 Dy1 75.6(10) . . . 18_545 ?
C20 C21 O4 Dy1 -103.5(7) . . . 18_545 ?
O5 Dy2 O5 Dy1 -24.5(10) 2_655 . . . ?
O5 Dy2 O5 Dy1 -153.34(16) 3_665 . . . ?
Dy2 Dy2 O5 Dy1 -88.9(6) 16_655 . . . ?
O5 Dy2 O5 Dy1 -142.3(9) 17 . . . ?
O5 Dy2 O5 Dy1 -35.6(3) 18_545 . . . ?
O5 Dy2 O5 Dy1 -88.9(6) 16_655 . . . ?
Cl3 Dy2 O5 Dy1 91.1(6) 2_655 . . . ?
O5 Dy2 O5 Dy1 150.07(16) 2_655 . . 17 ?
O5 Dy2 O5 Dy1 21.3(10) 3_665 . . 17 ?
Dy2 Dy2 O5 Dy1 85.7(6) 16_655 . . 17 ?
O5 Dy2 O5 Dy1 32.3(3) 17 . . 17 ?
O5 Dy2 O5 Dy1 139.0(10) 18_545 . . 17 ?
O5 Dy2 O5 Dy1 85.7(6) 16_655 . . 17 ?
Cl3 Dy2 O5 Dy1 -94.3(6) 2_655 . . 17 ?
O5 Dy2 O5 Dy2 64.4(4) 2_655 . . 16_655 ?
O5 Dy2 O5 Dy2 -64.4(4) 3_665 . . 16_655 ?
O5 Dy2 O5 Dy2 -53.3(4) 17 . . 16_655 ?
O5 Dy2 O5 Dy2 53.3(4) 18_545 . . 16_655 ?
O5 Dy2 O5 Dy2 0.000(0) 16_655 . . 16_655 ?
Cl3 Dy2 O5 Dy2 -180.0(2) 2_655 . . 16_655 ?
 
loop_
 _geom_hbond_atom_site_label_D 
 _geom_hbond_atom_site_label_H 
 _geom_hbond_atom_site_label_A 
 _geom_hbond_distance_DH 
 _geom_hbond_distance_HA 
 _geom_hbond_distance_DA 
 _geom_hbond_angle_DHA 
 _geom_hbond_site_symmetry_A 
C13 H13A N1  0.98 2.35 2.93(3) 117.7 .
C13 H13A N1'  0.98 2.54 3.09(3) 115.5 .
C13 H13B O5'  0.98 2.60 3.15(2) 115.6 2_655
C13 H13B Cl3  0.98 1.63 2.55(2) 154.1 .
C13 H13B Cl3  0.98 2.67 3.64(2) 172.8 2_655
C13 H13B Cl3  0.98 2.80 3.66(2) 146.6 3_665
C13 H13B Cl3'  0.98 2.25 3.17(2) 155.0 .
C13 H13C Cl2  0.98 2.90 3.65(2) 134.2 17
C15 H15A N1  0.96 2.44 3.36(5) 160.6 13
C15 H15B Cl4  0.96 2.28 3.19(7) 159.1 .
C15' H15F Cl2'  0.96 2.65 3.202(18) 117.1 8_544
O5' H52 Cl2'  0.82 2.49 3.223(12) 149.1 17
 
_refine_diff_density_max    1.580
_refine_diff_density_min   -1.452
_refine_diff_density_rms    0.159

_shelx_res_file
;

    YS-PD-107-100K.res created by SHELXL-2014/7


TITL YS-PD-107-100K in R-3 #148
REM reset to R-3 #148
CELL 0.71073 20.41234 20.41234 32.230393 90 90 120
ZERR 3 0.00037 0.00037 0.000808 0 0 0
LATT 3
SYMM -Y,+X-Y,+Z
SYMM +Y-X,-X,+Z
SFAC C  H  N  O  Cl Dy Ni
UNIT 432  342  36  90  45  21  18
omit -3 50.04
L.S. 16
ACTA
BOND $H
FMAP 2
PLAN 21
isor 0.01 O5 O3 C13 N1' N1
delu 0.02 0.01 O3 C13
isor 0.01 Cl4 Cl4' Cl2 Cl3 Cl3' Cl1 Cl1' Cl12 Cl2'
EADP Cl2 Cl2'
EADP Cl3 Cl3'
DFIX 1.78 0.01 C22 Cl2 C22 Cl2'
DFIX 1.78 0.01 C24 CL1 C24 CL1' C24 CL12
SIMU Cl1 Cl1' Cl2
SIMU 0.01 0.02 2 $Cl
simu 0.01 0.02 $C
DFIX 1.39 0.01 C22 C23 C21 C22
simu C19 C20 C21 C22 C23 C24
CONF
TEMP -120
HTAB
HTAB C13 N1
HTAB C13 N1'
EQIV $1 -y+1, x-y, z
HTAB C13 O5'_$1
HTAB C13 Cl3
HTAB C13 Cl3_$1
EQIV $2 -x+y+1, -x+1, z
HTAB C13 Cl3_$2
HTAB C13 Cl3'
EQIV $3 y+1/3, -x+y+2/3, -z+2/3
HTAB C13 Cl2_$3
EQIV $4 -x+2/3, -y+1/3, -z+1/3
HTAB C15 N1_$4
HTAB C15 Cl4
EQIV $5 -y+1/3, x-y-1/3, z-1/3
HTAB C15' Cl2'_$5
HTAB O5' Cl2'_$3
size 0.26 0.23 0.17
DFIX 1.39 0.01 C19 C24 C23 C24
WGHT    0.061700  281.763092
FVAR       0.49997   0.43119   0.70595
DY1   6    0.476560    0.310517    0.331623    11.00000    0.01693    0.01811 =
         0.09817   -0.00224   -0.00106    0.00881
DY2   6    0.666667    0.333333    0.302155    10.16667    0.01973    0.01973 =
         0.06051    0.00000    0.00000    0.00986
NI1   7    0.361341    0.151395    0.293250    11.00000    0.03186    0.02397 =
         0.06102    0.00025    0.00007    0.01685
O1    4    0.400725    0.346123    0.362933    11.00000    0.01999    0.02977 =
         0.06231   -0.00073   -0.00041    0.00896
C1    1    0.327426    0.306470    0.374275    11.00000    0.02723    0.02115 =
         0.06076    0.00212    0.00277    0.01376
C2    1    0.309757    0.290651    0.415920    11.00000    0.03216    0.03701 =
         0.06196    0.00271    0.00011    0.01745
AFIX  43
H2    2    0.349550    0.309821    0.435725    11.00000   -1.20000
AFIX   0
C3    1    0.235761    0.247700    0.429508    11.00000    0.03545    0.04182 =
         0.06528    0.00391    0.00953    0.01765
AFIX  43
H3    2    0.225117    0.236419    0.458152    11.00000   -1.20000
AFIX   0
C4    1    0.178167    0.221701    0.401220    11.00000    0.02821    0.04035 =
         0.07761   -0.00175    0.01213    0.01588
AFIX  43
H4    2    0.127107    0.192883    0.410175    11.00000   -1.20000
AFIX   0
C5    1    0.194449    0.237439    0.359732    11.00000    0.02644    0.03463 =
         0.07247   -0.00501   -0.00151    0.01693
AFIX  43
H5    2    0.153780    0.218578    0.340488    11.00000   -1.20000
AFIX   0
C6    1    0.269131    0.280472    0.344610    11.00000    0.02541    0.02237 =
         0.06255   -0.00475   -0.00500    0.01849
C7    1    0.279908    0.295941    0.299718    11.00000    0.02877    0.02983 =
         0.05485   -0.00687   -0.00667    0.01905
C8    1    0.238002    0.324601    0.279620    11.00000    0.05004    0.05549 =
         0.06816   -0.00639   -0.00961    0.03944
AFIX  43
H8    2    0.206584    0.336624    0.295849    11.00000   -1.20000
AFIX   0
C9    1    0.241005    0.335809    0.237211    11.00000    0.06574    0.06639 =
         0.06758   -0.00280   -0.01332    0.04938
AFIX  43
H9    2    0.212291    0.355530    0.224762    11.00000   -1.20000
AFIX   0
C10   1    0.285257    0.318478    0.213372    11.00000    0.06775    0.05880 =
         0.06359   -0.00365   -0.00934    0.04250
AFIX  43
H10   2    0.286297    0.324558    0.184113    11.00000   -1.20000
AFIX   0
C11   1    0.328796    0.291947    0.231850    11.00000    0.04756    0.04320 =
         0.06032   -0.00536   -0.00006    0.02762
AFIX  43
H11   2    0.359857    0.280348    0.215018    11.00000   -1.20000
AFIX   0
C12   1    0.327893    0.281908    0.274844    11.00000    0.03127    0.02567 =
         0.06160   -0.00448   -0.00334    0.01675
O2    4    0.372393    0.257201    0.291520    11.00000    0.02567    0.02873 =
         0.06031    0.00099    0.00032    0.01669
O3    4    0.477166    0.216807    0.287632    11.00000    0.03408    0.03129 =
         0.09546    0.01092    0.02081    0.01998
C13   1    0.489210    0.225097    0.242894    11.00000    0.15031    0.13112 =
         0.18357    0.01072    0.03707    0.09504
AFIX 137
H13A  2    0.459346    0.175663    0.229524    11.00000   -1.50000
H13B  2    0.542973    0.245176    0.236859    11.00000   -1.50000
H13C  2    0.473403    0.260022    0.232234    11.00000   -1.50000
AFIX   0
DFIX 1.15 0.01 N1 C14 N1' C14'
DFIX 1.48 0.01 C14 C15 C14' C15'
DFIX 2.65 0.01 N1 C15 N1 C15'
simu 0.01 0.02 N1 N1' C14 C14' C15 C15'
PART 1
N1    3    0.327990    0.125313    0.224998    21.00000    0.10265    0.05167 =
         0.08738   -0.00419   -0.00802    0.05874
C14   1    0.271105    0.109652    0.208656    21.00000    0.11697    0.06741 =
         0.10002   -0.00505   -0.00524    0.04794
C15   1    0.209494    0.096563    0.178918    21.00000    0.13806    0.11494 =
         0.12578   -0.00345   -0.00711    0.03148
AFIX   3
H15A  2    0.236923    0.130958    0.156797    21.00000   -1.50000
H15B  2    0.171698    0.107214    0.189269    21.00000   -1.50000
H15C  2    0.185548    0.045570    0.168722    21.00000   -1.50000
AFIX   0
PART 2
N1'   3    0.316868    0.118308    0.233831   -21.00000    0.09917    0.05074 =
         0.09026   -0.01072   -0.01321    0.05663
C14'  1    0.272422    0.060232    0.221039   -21.00000    0.11581    0.06852 =
         0.09921   -0.00338   -0.00570    0.04908
C15'  1    0.209932   -0.001164    0.197702   -21.00000    0.12674    0.08649 =
         0.10237   -0.01350   -0.01247    0.04056
AFIX   3
H15D  2    0.176205    0.012627    0.184737   -21.00000   -1.50000
H15E  2    0.182630   -0.040177    0.217825   -21.00000   -1.50000
H15F  2    0.230777   -0.019390    0.177033   -21.00000   -1.50000
AFIX  66
PART 0
N2    3    0.259478    0.098165    0.322740    11.00000    0.02787    0.02522 =
         0.09556   -0.00407   -0.00788    0.01428
C16   1    0.188105    0.058658    0.304805    11.00000    0.03134    0.04355 =
         0.17270   -0.01253   -0.01859    0.01618
AFIX  43
H16   2    0.183001    0.056270    0.275464    11.00000   -1.20000
AFIX  65
C17   1    0.124202    0.022644    0.329802    11.00000    0.03340    0.04424 =
         0.18571    0.00033   -0.00371    0.01796
AFIX  43
H17   2    0.075422   -0.004357    0.317544    11.00000   -1.20000
AFIX  65
C18   1    0.131670    0.026138    0.372734    11.00000    0.05547    0.04668 =
         0.17185    0.02036    0.02937    0.03145
AFIX  43
H18   2    0.087995    0.001524    0.389818    11.00000   -1.20000
AFIX  65
C19   1    0.203042    0.065645    0.390669    11.00000    0.08004    0.04760 =
         0.12114    0.02362    0.03690    0.04640
C20   1    0.266947    0.101659    0.365673    11.00000    0.06172    0.03883 =
         0.08326    0.01531    0.01926    0.03937
AFIX   0
C21   1    0.339903    0.144715    0.380098    11.00000    0.08106    0.04409 =
         0.05828    0.00868    0.01066    0.04777
C22   1    0.347493    0.148213    0.422291    11.00000    0.12916    0.06178 =
         0.07133    0.00700    0.00389    0.06446
C23   1    0.282522    0.111395    0.448573    11.00000    0.15881    0.06986 =
         0.08098    0.01164    0.03223    0.06721
AFIX  43
H23   2    0.289297    0.116031    0.477802    11.00000   -1.20000
AFIX   0
C24   1    0.209833    0.069075    0.432693    11.00000    0.12730    0.06728 =
         0.10610    0.02060    0.05519    0.06187

O4    4    0.398530    0.179400    0.355036    11.00000    0.03793    0.02651 =
         0.06037   -0.00807   -0.01771    0.01718
PART 1
CL1   5    0.140150    0.018067    0.470172    10.33333    0.10258    0.05288 =
         0.04176    0.00995    0.01472    0.05201
PART 2
CL1'  5    0.110787    0.019407    0.451298    10.33333    0.11597    0.05788 =
         0.09972   -0.00262    0.07458    0.01887
PART 3
CL12  5    0.167586    0.057745    0.481021    10.33333    0.09820    0.14310 =
         0.09406    0.04122    0.03259    0.07282
PART 0

PART 1
CL2   5    0.452882    0.209372    0.436810    10.50000    0.10730    0.08329 =
         0.02933   -0.00691   -0.00166    0.05163
PART 2
CL2'  5    0.419589    0.196006    0.452353    10.50000    0.10730    0.08329 =
         0.02933   -0.00691   -0.00166    0.05163
PART 0
PART 1
O5    4    0.605704    0.374820    0.318428    10.50000    0.02166    0.02353 =
         0.04552   -0.00052    0.00401    0.01368
AFIX   3
H51   2    0.597516    0.380429    0.293631    10.50000   -1.50000
AFIX   0

PART 2
O5'   4    0.591668    0.384500    0.289161    10.50000    0.02263    0.02760 =
         0.05568    0.00199   -0.00425    0.01218
AFIX   3
H52   2    0.580716    0.388346    0.265020    10.50000   -1.50000
AFIX   0
PART 0
PART 1
CL3   5    0.626174    0.309192    0.220093    10.13334    0.03569    0.01297 =
         0.02134   -0.00439   -0.00623    0.01515
PART 2
CL3'  5    0.666667    0.333333    0.237462    10.03333    0.03569    0.01297 =
         0.02134   -0.00439   -0.00623    0.01515
PART 0
PART 1
CL4   5    0.090630    0.114867    0.234896    10.16667    0.20118    0.21080 =
         0.20162    0.00555   -0.00350    0.11354
PART 2
CL4'  5    0.120361    0.125958    0.203174    10.16667    0.19956    0.20731 =
         0.19708    0.01295   -0.00448    0.10825
PART 0
HKLF 4

REM  YS-PD-107-100K in R-3 #148
REM R1 =  0.0489 for    4074 Fo > 4sig(Fo)  and  0.0549 for all    4561 data
REM    395 parameters refined using    322 restraints

END

WGHT      0.0637    334.0180

REM Instructions for potential hydrogen bonds
HTAB C13 N1
HTAB C13 N1'
EQIV $6 x-y+1/3, x-1/3, -z+2/3
HTAB C13 Cl2_$6
HTAB C13 O5'_$1
HTAB C13 Cl3
HTAB C13 Cl3_$1
HTAB C13 Cl3_$2
HTAB C13 Cl3'
HTAB Cl3 O3
HTAB C13 Cl2_$3
HTAB C15 N1_$4
HTAB C15 Cl4
HTAB C15' Cl2'_$5
HTAB O5' Cl2'_$3

REM Highest difference peak  1.580,  deepest hole -1.452,  1-sigma level  0.159
Q1    1   0.3935  0.1913  0.4442  11.00000  0.05    1.58
Q2    1   0.3336  0.1274  0.2721  11.00000  0.05    1.43
Q3    1   0.2613  0.1701  0.1320  11.00000  0.05    1.42
Q4    1   0.3658  0.1451  0.2305  11.00000  0.05    1.26
Q5    1   0.2422  0.1003  0.4413  11.00000  0.05    1.22
Q6    1   0.0905  0.0194  0.4389  11.00000  0.05    1.12
Q7    1   0.5069  0.3403  0.3517  11.00000  0.05    1.10
Q8    1   0.1210  0.0228  0.3470  11.00000  0.05    1.06
Q9    1   0.6480  0.4376  0.3338  11.00000  0.05    0.91
Q10   1   0.5105  0.3151  0.3114  11.00000  0.05    0.85
Q11   1   0.5359  0.3778  0.3283  11.00000  0.05    0.85
Q12   1   0.0532  0.0576  0.2481  11.00000  0.05    0.83
Q13   1   0.3228  0.1412  0.4489  11.00000  0.05    0.79
Q14   1   0.4802  0.2769  0.3506  11.00000  0.05    0.77
Q15   1   0.6566  0.3836  0.3349  11.00000  0.05    0.76
Q16   1   0.1065  0.0491  0.1797  11.00000  0.05    0.75
Q17   1   0.4873  0.2517  0.3315  11.00000  0.05    0.73
Q18   1   0.4166  0.2440  0.3313  11.00000  0.05    0.71
Q19   1   0.4360  0.2645  0.3105  11.00000  0.05    0.69
Q20   1   0.4059  0.3072  0.3272  11.00000  0.05    0.69
Q21   1   0.4358  0.3104  0.3507  11.00000  0.05    0.65
;
_shelx_res_checksum   66950

_shelx_hkl_file
;
   0   0   6 127394. 3373.12   3
   0   0   9 329820. 8692.49   3
   0   0 -12 20814.2 611.682   3
   0   0  12 20534.2 610.897   3
   0   0 -15 8009.49 296.055   2
   0   0 -15 8846.97 304.432   3
   0   0 -18 39265.7 1138.88   2
   0   0 -18 40044.6 1143.87   3
   0   0 -21 57614.3 1641.83   2
   0   0 -21 58578.8 1645.67   3
   0   0 -24 32018.2 974.174   3
   0   0 -24 31922.9 971.093   2
   0   0 -27 26187.4 849.605   3
   0   0 -27 27205.1 849.068   2
   0   0 -30 6089.76 300.945   3
   0   0 -30 6347.86 301.554   2
   0   0 -33 746.100 136.947   2
   0   0 -36 701.290 156.583   2
   0   0 -39 1525.52 179.180   2
   0   0 -42 837.482 159.236   2
   1   0 -41 299.838 125.852   2
   0  -1 -41 246.616 128.181   2
  -1   1 -41 328.522 119.721   2
   1   0 -38 233.372 131.583   2
   0  -1 -38 377.532 130.939   2
  -1   1 -38 352.600 125.338   2
   1   0 -35 47.9637 111.803   3
   0  -1 -35 437.181 117.583   2
   1   0 -35 165.161 113.672   2
  -1   1 -35 328.425 112.126   2
   1   0 -32 129.489 104.770   3
   1   0 -32 275.381 101.935   2
   0  -1 -32 331.817 106.538   2
  -1   1 -32 236.965 98.6671   2
   0  -1 -29 2331.53 184.702   3
   0  -1 -29 2561.82 181.927   2
   1   0 -29 2606.68 185.981   2
  -1   1 -29 2629.85 178.601   2
   1   0 -29 2354.60 186.293   3
  -1   1 -26 8026.95 327.502   2
  -1   1 -26 7973.20 328.223   3
   0  -1 -26 7829.73 333.667   2
   0  -1 -26 7495.41 339.743   3
   1   0 -26 7567.21 339.156   3
   1   0 -26 8012.71 344.018   2
  -1   1 -23 10601.4 382.515   3
   1   0 -23 9997.23 387.594   3
   0  -1 -23 10204.5 387.115   2
  -1   1 -23 9876.71 377.512   2
   0  -1 -23 10792.8 402.671   3
   1   0 -23 10156.8 388.797   2
  -1   1 -20 17084.9 555.159   2
   0  -1 -20 17227.6 562.256   2
   1   0 -20 16980.8 564.613   2
   1   0 -20 17200.0 562.447   3
   0  -1 -20 17242.2 570.449   3
  -1   1 -20 17862.3 559.513   3
   0   1  17 21289.7 670.721   3
   0  -1 -17 21550.0 667.010   3
   0  -1 -17 20766.6 655.675   2
   1   0 -17 21522.3 663.156   2
   1   0 -17 22112.9 662.484   3
  -1   1 -17 22050.1 654.122   3
  -1   1 -17 21144.6 648.480   2
  -1   1 -14 675.968 62.4501   2
   1   0 -14 650.884 66.1459   3
   1  -1  14 617.490 61.2373   3
  -1   1 -14 801.673 67.3890   3
   0  -1 -14 753.768 73.3587   3
   0   1  14 633.799 70.9568   3
   1  -1  11 22364.2 652.913   3
   0   1  11 23125.5 673.524   3
  -1   1 -11 23975.7 656.219   3
  -1   1 -11 21879.9 651.562   2
   1   0 -11 22944.2 665.609   3
   1  -1   8 51525.8 1386.50   3
   0   1   8 51051.2 1394.89   2
   0   1   8 52059.9 1406.09   3
  -1   1  -8 51209.5 1385.84   3
   1  -1   5 135174. 3624.19   3
   0   1   5 140859. 3641.75   3
   0  -1  -5 136532. 3633.22   2
   0   1   5 139353. 3634.64   2
   1   0   4 180444. 4770.98   2
   1   0   4 182556. 4775.51   3
   1  -1  -4 181092. 4783.08   3
   1  -1  -7 94037.8 2569.21   2
   1   0   7 97134.8 2561.54   2
   1   0   7 97681.2 2567.90   3
  -1   0 -10 54989.5 1496.18   3
   0   1 -10 55846.5 1486.19   3
   1   0  10 53244.1 1493.99   3
   1   0  13 2114.07 113.138   3
   1  -1 -13 2261.01 122.068   3
  -1   0 -13 2000.18 112.243   3
   0   1 -13 2196.20 110.471   3
  -1   0 -13 1798.79 103.202   2
  -1   0 -16 1814.33 112.139   2
   1   0  16 2101.12 125.051   3
   1  -1 -16 1995.14 122.695   3
  -1   0 -16 2079.75 125.238   3
   0   1 -16 2101.86 116.855   3
   0   1 -16 1972.31 118.144   2
  -1   0 -19 13218.3 445.022   3
   0   1 -19 12645.1 439.104   2
   1  -1 -19 13168.2 454.040   3
   1   0  19 12552.2 446.853   3
   0   1 -19 13417.5 437.429   3
   1  -1 -19 13211.0 448.832   2
  -1   0 -19 12675.1 435.438   2
   1  -1 -22 5765.58 261.774   3
   0   1 -22 5391.35 248.987   2
   0   1 -22 5834.66 251.093   3
  -1   0 -22 5465.17 247.650   2
  -1   0 -22 5989.25 260.349   3
   1  -1 -22 5496.75 255.620   2
   1  -1 -25 11916.5 456.201   2
  -1   0 -25 12698.4 461.719   3
  -1   0 -25 12662.2 451.893   2
   1  -1 -25 12387.7 465.900   3
   0   1 -25 12204.4 448.219   3
   0   1 -25 12464.0 453.075   2
   1  -1 -28 7236.88 330.305   2
   0   1 -28 7224.25 319.049   3
   1  -1 -28 6852.11 336.104   3
  -1   0 -28 7699.62 325.692   2
   0   1 -28 7906.98 334.879   2
   0   1 -31 1789.74 153.534   3
   1  -1 -31 1431.91 161.679   3
  -1   0 -31 1511.34 148.729   2
   1  -1 -31 1716.21 160.584   2
   0   1 -31 1597.33 153.867   2
  -1   0 -34 883.826 136.919   2
   0   1 -34 804.035 136.207   2
   1  -1 -34 603.916 145.056   3
   1  -1 -34 1045.33 142.187   2
   1  -1 -37 413.888 140.117   2
  -1   0 -37 602.626 135.707   2
   0   1 -37 539.373 135.769   2
   0   1 -40 138.329 119.876   2
   1  -1 -40 273.870 125.574   2
  -1   0 -40 164.642 117.294   2
   0   1 -43 476.970 144.174   2
   1   1 -42-43.7805 118.651   2
   1  -2 -42 53.4978 114.821   2
  -2   1 -39 6.45929 103.096   2
   1  -2 -39-78.5989 118.991   2
   1   1 -39-6.91511 107.541   2
   1   1 -36 290.035 106.011   3
   1  -2 -36 236.217 116.271   2
   1   1 -36 326.162 113.747   2
  -2   1 -36 505.861 111.162   2
   1  -2 -33-143.502 112.602   2
   1   1 -33-78.3370 111.149   2
   1   1 -33 32.4538 89.0275   3
   1  -2 -33-57.8928 112.886   3
  -2   1 -33 49.5166 86.7013   2
   1  -2 -30-83.8266 97.6601   3
   1  -2 -30 34.4545 83.4551   2
   1   1 -30-5.09258 77.8654   3
   1   1 -30-60.5879 97.1613   2
  -2   1 -30 65.1459 71.7081   2
  -2   1 -27 40.8278 66.9297   2
   1  -2 -27 44.7513 91.7919   3
   1   1 -27-13.9344 84.4456   3
   1  -2 -27-103.260 96.1286   2
   1   1 -27-59.7912 86.0544   2
   1   1 -24-75.8028 74.8855   3
   1   1 -24-84.4297 83.7111   2
   1  -2 -24-65.3080 84.1640   3
   1  -2 -24-59.5376 82.4668   2
   1   1 -21 878.764 89.4644   3
   1  -2 -21 695.177 93.7094   3
   1  -2 -21 851.909 97.1966   2
   2  -1  21 775.813 88.9212   3
  -2   1 -21 693.330 84.3615   2
   1   1 -21 657.761 92.5709   2
  -2   1 -18 23.0731 40.4501   2
   1  -2 -18-3.92134 56.1123   3
   1   1 -18 28.8839 42.1530   3
   2  -1  18-22.0589 49.4941   3
   2  -1  15 31.2513 35.1633   3
   1  -2 -15 37.4805 45.1786   3
  -2   1 -15 21.2528 34.1993   2
   1   1 -15 48.4377 34.0096   3
  -1   2  12 600.674 65.1816   3
   1  -2 -12 628.186 30.9790   1
   2  -1  12 654.242 57.0308   3
   1   1 -12 566.733 58.1285   3
  -2   1 -12 505.547 49.6025   2
  -1   2   9 4019.10 164.472   3
   1  -2  -9 4081.45 154.761   2
   1  -2  -9 3947.59 120.636   1
  -2   1  -9 3646.48 137.942   2
   2  -1   9 3894.46 144.173   3
  -1   2   6 2582.27 104.057   2
  -1   2   6 2736.50 115.637   3
   2  -1   6 2661.61 94.1988   2
   1  -2  -6 2749.62 106.257   2
  -1   2   6 2559.12 86.0324   1
   1  -2  -3 212.733 24.4140   3
  -1   2   3 245.110 18.1915   1
  -1   2   3 192.184 20.0084   2
  -1   2   3 228.764 25.5776   3
   1  -2  -3 221.924 21.1786   2
  -1   2   0 1047.03 46.3360   1
   1  -2   0 1462.87 50.8921   1
   1  -2   3 3371.54 107.133   1
   1  -2   6 49565.0 1317.36   1
   1   1   6 49510.2 1345.81   3
   1   1   6 49430.3 1336.04   2
  -1   2  -9 10316.1 304.383   3
   1  -2   9 10277.3 287.841   1
   1   1   9 10232.1 291.696   1
   1   1   9 9840.51 317.312   2
   1   1   9 10205.4 329.739   3
   1   1  12 7950.53 281.126   2
   2  -1 -12 8435.03 296.883   3
   1   1  12 8060.04 236.882   1
   1  -2  12 8121.83 237.842   1
  -1  -1 -12 9005.97 298.947   3
   1   1  12 8380.65 294.021   3
   1   1  15 14958.7 492.377   3
   2  -1 -15 15457.5 495.778   3
  -1  -1 -15 14383.2 476.403   2
  -1   2 -15 16064.5 469.585   3
  -1  -1 -15 15305.2 496.128   3
   1   1  18 1097.33 107.430   3
  -1  -1 -18 1271.50 102.719   2
  -1   2 -18 1296.83 97.4621   2
  -1  -1 -18 1292.28 108.873   3
  -1   2 -18 1187.35 90.3036   3
   2  -1 -18 1079.04 102.312   3
   2  -1 -21 5690.71 254.166   2
  -1   2 -21 5294.33 236.231   2
  -1  -1 -21 5005.49 238.889   2
   1   1  21 5585.22 261.449   3
  -1  -1 -21 5640.35 258.284   3
   2  -1 -21 5485.17 253.098   3
  -1   2 -21 5788.44 237.899   3
  -1  -1 -24 1569.79 133.166   2
  -1   2 -24 1649.84 125.396   3
  -1  -1 -24 1640.63 145.269   3
   2  -1 -24 1835.40 150.922   2
  -1   2 -24 1749.04 135.159   2
   2  -1 -24 1639.94 145.614   3
  -1  -1 -27 53.2489 77.5198   2
  -1   2 -27 122.219 66.6390   3
   2  -1 -27 5.28051 89.2155   2
  -1   2 -27 114.871 69.7832   2
   2  -1 -27-74.6258 113.870   3
   2  -1 -30 589.379 122.015   3
  -1   2 -30 878.154 115.757   2
   2  -1 -30 581.957 113.636   2
  -1  -1 -30 592.647 113.951   2
  -1  -1 -33 169.175 93.5533   2
  -1   2 -33 321.932 97.2934   2
   2  -1 -33 262.516 112.364   2
   2  -1 -33 43.9251 120.691   3
  -1  -1 -36 222.283 108.954   2
  -1   2 -36 566.577 116.209   2
   2  -1 -36 253.596 127.234   3
   2  -1 -36 507.123 125.996   2
  -1   2 -39 123.914 103.792   2
   2  -1 -39 65.2594 110.896   2
   2  -1 -42-76.6959 122.798   2
  -1   2 -42 95.9165 105.474   2
   2   0 -40 51.3169 110.141   2
  -2   2 -40-25.8412 110.055   2
   2   0 -37-106.037 124.224   3
   0  -2 -37 13.5070 110.155   2
   2   0 -37 6.82416 105.417   2
  -2   2 -37-18.0583 101.689   2
  -2   2 -34 38.9955 83.6954   2
   2   0 -34-97.1335 133.737   3
   0  -2 -34-6.23810 100.816   2
   2   0 -34 12.8774 103.091   2
   2   0 -31 1098.21 142.424   2
   0  -2 -31 1199.92 141.370   2
  -2   2 -31 1112.07 129.354   2
   2   0 -31 1055.05 140.149   3
   2   0 -28 1193.68 137.018   3
   0  -2 -28 1232.75 135.785   2
  -2   2 -28 1314.32 129.391   2
   2   0 -28 1240.04 142.229   2
   0  -2 -28 1228.44 142.125   3
   0  -2 -25 3594.74 209.416   2
   0  -2 -25 3775.66 223.049   3
  -2   2 -25 3663.28 194.461   2
   2   0 -25 3289.10 204.366   3
   2   0 -25 3522.54 211.861   2
   0  -2 -22 688.813 92.2850   2
   2   0 -22 682.636 96.3820   2
   2   0 -22 549.670 88.6199   3
   0  -2 -22 575.776 93.5671   3
  -2   2 -22 522.448 79.5809   2
  -2   2 -19 1677.12 112.103   2
   2   0 -19 1667.06 121.222   3
   0  -2 -19 1572.63 119.550   2
   0  -2 -19 1762.44 135.348   3
   0   2  19 1673.74 134.681   3
  -2   2 -19 1904.35 118.429   3
   0   2  16 3739.95 186.396   3
   2  -2  16 3658.88 160.762   3
   0  -2 -16 3911.94 188.751   3
  -2   2 -16 3570.81 159.739   2
   2  -2  16 3507.46 111.032   1
   2   0 -16 3924.19 181.843   3
  -2   2 -16 3945.50 163.733   3
   2   0 -13 7729.56 272.495   3
   2  -2  13 7303.87 214.195   1
   0   2  13 7575.23 280.940   3
   0  -2 -13 7734.57 281.995   3
   0   2  13 7152.49 211.439   1
   0   2  13 7288.33 267.195   2
  -2   2 -13 8233.38 254.714   3
  -2   2 -13 7226.45 248.160   2
   2  -2  13 7418.01 249.895   3
   0   2  10 2909.80 126.252   2
   2  -2  10 2735.03 91.4760   1
   2  -2  10 2679.36 107.678   3
   0   2  10 2636.26 91.5496   1
  -2   2 -10 2763.79 109.554   2
   0   2  10 2841.18 134.260   3
   0   2   7 90077.8 2337.08   2
   0  -2  -7 89272.4 2312.90   1
   0   2   7 85884.3 2311.55   1
   0   2   7 89230.3 2348.12   3
   2  -2   7 85311.2 2311.88   3
   0  -2  -7 86100.2 2333.20   2
   0   2   4 17611.2 500.192   3
   0  -2  -4 17370.4 500.028   3
   0   2   4 17653.8 491.547   2
   0   2   4 17325.9 483.469   1
   0  -2  -1 39528.0 1053.50   1
   0   2   1 38923.8 1054.26   1
   0  -2   2 14832.0 414.955   1
   0  -2   5 17054.3 473.835   1
   2   0   8 21213.4 562.926   3
   2   0   8 21060.3 552.340   2
   0  -2   8 22534.3 537.249   1
   2  -2  -8 21641.0 567.195   2
   2  -2  -8 21017.9 526.459   1
   2  -2 -11 3093.79 99.0597   1
  -2   0 -11 2857.62 125.612   2
   2   0  11 2979.15 128.495   2
   2   0  11 3112.81 136.628   3
   0   2 -11 3329.17 126.725   3
   2  -2 -14 6106.24 173.368   1
  -2   0 -14 5692.31 219.324   2
   2   0  14 5762.57 227.882   3
   2  -2 -14 5763.34 240.542   3
   0   2 -14 5985.57 216.656   3
   0   2 -17 16933.1 518.537   3
   2   0  17 16790.6 536.634   3
   2  -2 -17 16633.2 550.423   3
  -2   0 -17 16562.1 524.054   2
   2   0  20 20332.7 646.600   3
  -2   0 -20 19649.9 629.177   2
   2  -2 -20 19259.6 657.381   3
   0   2 -20 21259.4 629.763   3
  -2   0 -23 3530.25 193.958   2
   2  -2 -23 3636.48 210.357   2
   0   2 -23 3776.40 189.879   3
   2  -2 -23 3227.82 208.266   3
   2   0  23 3886.06 207.907   3
   0   2 -23 3725.81 198.376   2
  -2   0 -26 419.241 87.4369   2
   0   2 -26 292.630 87.7072   2
   0   2 -26 571.563 89.0638   3
   2  -2 -26 442.679 104.703   3
   2  -2 -26 248.359 99.3149   2
   0   2 -29 1029.16 125.358   2
   2  -2 -29 1032.20 138.109   3
  -2   0 -29 908.559 118.237   2
   2  -2 -29 1054.54 132.281   2
   0   2 -29 1140.39 115.508   3
   0   2 -32 4919.71 265.267   2
  -2   0 -32 4856.65 256.113   2
   2  -2 -32 4379.17 265.273   2
   2  -2 -32 4609.67 279.721   3
   0   2 -32 4822.18 248.968   3
   2  -2 -35 975.345 157.608   2
   0   2 -35 1018.74 141.801   2
  -2   0 -35 1141.19 144.015   2
   2  -2 -35 772.397 142.622   3
   2  -2 -38 63.6348 111.132   3
   0   2 -38 260.638 110.776   2
   2  -2 -38 166.006 118.864   2
   2  -2 -41-7.60688 114.693   2
   0   2 -41-6.92112 103.611   2
   1   2 -43-183.206 134.608   2
   2  -3 -40-113.183 125.681   2
   1   2 -40-90.0215 124.376   2
   1   2 -37-104.072 119.999   2
   2  -3 -37-95.1082 115.684   3
   1   2 -34 488.490 103.373   3
   1   2 -34 307.263 108.085   2
   2  -3 -34 345.566 122.455   2
   2  -3 -34 394.022 116.273   3
  -3   1 -34 479.781 108.192   2
   2  -3 -31 428.486 118.571   3
   1   2 -31 213.966 93.7411   2
  -3   1 -31 309.150 93.9450   2
   2  -3 -31 278.110 107.813   2
   1   2 -31 171.214 80.5582   3
  -3   1 -28 118.233 74.8900   2
   1   2 -28 25.4404 74.8360   2
   2  -3 -28 27.8392 91.6752   2
   1   2 -28 229.195 73.1265   3
   2  -3 -28 108.279 91.0598   3
   2  -3 -25 32.9856 89.1236   3
   1   2 -25-12.3321 74.5523   3
   3  -1  25 9.14949 82.7640   3
   1   2 -25 60.5788 73.6668   2
  -3   1 -25 28.3584 67.8559   2
   2  -3 -25-9.97987 96.7159   2
   3  -1  22 2324.12 152.991   3
  -3   1 -22 2352.04 143.959   2
   2  -3 -22 2070.19 162.354   3
   2  -3 -22 1892.28 155.470   2
   1   2 -22 2304.05 142.671   3
   1   2 -19 13324.5 430.645   3
   2  -3 -19 13274.7 467.175   3
   3  -1  19 12648.2 350.697   1
  -3   1 -19 13241.2 426.992   2
   1   2 -19 12561.9 350.941   1
   3  -1  19 13427.5 439.637   3
   2  -3 -16 12551.2 358.721   1
  -3   1 -16 13185.8 412.300   2
   3  -1  16 12598.9 419.775   3
   2  -3 -16 13014.3 447.545   3
   1   2 -16 13647.9 419.032   3
  -3   1 -13 30794.4 875.357   2
   3  -1  13 30443.4 887.781   3
   3  -1  13 31084.7 881.833   2
   2  -3 -13 31401.0 841.101   1
   2  -3 -10 49070.0 1315.03   1
   3  -1  10 47896.9 1346.30   3
   3  -1  10 48081.8 1336.40   2
   2  -3 -10 49229.9 1357.20   2
  -3   1 -10 49674.8 1336.08   2
   1   2 -10 50200.5 1319.72   1
   2  -3  -7 2282.48 102.499   2
   3  -1   7 2271.70 88.8705   2
   2  -3  -7 2333.41 113.719   3
  -2   3   7 2118.35 99.8418   2
   2  -3  -7 2188.20 83.7373   1
   1   2  -7 2365.12 89.7807   1
  -2   3   4 14201.1 406.800   1
   2  -3  -4 14348.9 414.554   2
   2  -3  -4 15112.1 430.516   3
   2  -3  -1 208.260 18.5042   2
   2  -3  -1 207.284 21.6564   1
   2  -3  -1 202.916 23.1569   3
   2  -3   2 11430.2 327.610   1
   1   2   5 85658.4 2293.12   3
   1   2   5 85294.0 2274.34   1
   2  -3   5 85306.8 2265.87   1
   2  -3   8 18401.9 506.789   3
   2  -3   8 18445.2 516.630   1
   1   2   8 18777.8 525.536   1
   1   2   8 18814.7 543.039   2
   1   2   8 18889.2 556.125   3
   2  -3  11 48741.5 1291.94   1
   1   2  11 49418.3 1335.00   2
   1   2  11 48396.8 1350.50   3
   2  -3  11 46932.4 1298.34   3
   1   2  11 47965.4 1296.18   1
   1   2  14 56278.3 1579.08   1
  -2   3 -14 62547.7 1608.91   3
   1   2  14 60938.1 1641.11   2
   1   2  14 60870.0 1658.22   3
   2  -3  14 58860.5 1579.98   1
   3  -1 -14 60822.0 1656.53   3
  -1  -2 -14 60322.8 1659.19   3
  -2   3 -17 34186.8 945.788   2
  -2   3 -17 35590.3 940.487   3
   1   2  17 34875.6 987.049   3
   3  -1 -17 34372.1 980.476   3
  -1  -2 -17 35942.3 991.406   3
  -1  -2 -17 33425.9 960.258   2
   1   2  17 31502.9 881.545   1
   2  -3  17 31898.3 888.115   1
   3  -1 -20 11641.1 430.253   3
  -1  -2 -20 11826.9 415.291   2
  -1  -2 -20 11944.7 433.699   3
  -2   3 -20 11596.7 398.314   2
  -2   3 -20 11465.3 392.162   3
   1   2  20 12232.3 440.055   3
   3  -1 -23 9531.10 388.150   3
   1   2  23 9803.75 398.735   3
   3  -1 -23 9500.80 386.140   2
  -2   3 -23 9474.31 359.659   2
  -1  -2 -23 9879.89 374.334   2
   3  -1 -26 2234.49 185.974   3
  -2   3 -26 2714.99 176.088   2
  -1  -2 -26 2590.68 187.707   2
   3  -1 -26 2507.51 191.311   2
   3  -1 -29 934.937 138.919   3
   3  -1 -29 1185.06 143.752   2
  -2   3 -29 933.724 119.742   2
  -1  -2 -29 923.053 132.233   2
   3  -1 -32 1010.30 150.171   3
   3  -1 -32 929.717 150.162   2
  -1  -2 -32 1155.67 149.658   2
  -2   3 -32 829.131 132.749   2
  -2   3 -35 33.9415 105.323   2
   3  -1 -35-52.4666 128.741   3
   3  -1 -35-40.8341 116.582   2
   3  -1 -38-6.78969 108.715   3
   3  -1 -38-21.7223 117.745   2
  -2   3 -38-79.6459 114.336   2
   3  -1 -41 108.599 124.598   2
   3  -1 -41 6.97198 121.069   3
  -2   3 -41-206.369 126.603   2
  -2   3 -44 604.877 144.548   2
   2   1 -41-7.34826 115.789   2
   2   1 -38-158.288 126.097   2
   1  -3 -38-157.512 126.036   2
   1  -3 -35-152.926 115.210   2
   2   1 -35-150.370 114.195   2
   2   1 -32 54.3388 93.0820   3
  -3   2 -32-35.7247 94.5759   2
   1  -3 -32-104.648 115.407   2
   2   1 -32 66.6858 92.0510   2
   1  -3 -32 39.7706 97.4280   3
   1  -3 -29 85.8412 84.2385   3
   2   1 -29 115.478 80.9177   3
  -3   2 -29 69.6760 81.3257   2
   1  -3 -29 11.2684 85.2755   2
   2   1 -29 131.536 92.6077   2
   2   1 -26 313.140 97.4112   2
  -3   2 -26 468.962 94.6871   2
   2   1 -26 646.461 103.571   3
   1  -3 -26 474.514 106.385   2
   1  -3 -26 481.592 110.616   3
   1  -3 -23 1582.34 139.948   2
   3  -2  23 1659.59 131.702   3
  -3   2 -23 1663.10 131.175   2
   1  -3 -23 1850.62 160.115   3
   2   1 -23 1726.83 135.590   3
  -3   2 -20 82.4773 47.6874   2
   2   1 -20 252.150 62.0692   3
   1  -3 -20 87.3436 69.9261   3
   3  -2  20 287.036 57.3906   3
   1  -3 -20 111.179 60.2247   2
  -3   2 -17 1808.21 106.801   2
   2   1 -17 1815.18 119.299   3
   3  -2  17 1816.44 109.151   3
   1  -3 -17 1978.88 136.850   3
  -1   3  17 1716.03 134.689   3
   3  -2  17 1854.98 69.3664   1
  -3   2 -14 5239.56 195.090   2
   3  -2  14 4952.82 196.103   3
  -1   3  14 5611.65 239.217   3
   1  -3 -14 5397.05 164.982   1
   1  -3 -11 3273.67 114.298   1
  -1   3  11 3371.11 149.581   2
   3  -2  11 3228.26 131.267   3
  -3   2 -11 3399.28 129.268   2
  -1   3  11 3378.52 113.585   1
  -1   3  11 3480.25 164.967   3
  -1   3   8 76668.8 2066.54   2
  -1   3   8 80184.4 2087.37   3
  -1   3   8 76078.7 2037.07   1
   1  -3  -8 76236.9 2064.78   2
  -3   2  -8 76001.0 2039.07   2
   1  -3  -8 77372.1 2038.28   1
   3  -2   8 75912.7 2040.51   2
  -1   3   5 94814.3 2427.08   3
   3  -2   5 88715.1 2381.34   2
   1  -3  -5 91079.9 2407.64   2
   1  -3  -5 92347.8 2422.88   3
  -1   3   5 90284.6 2408.08   2
  -1   3   5 89194.0 2395.48   1
  -1   3   2 19903.0 554.308   1
   1  -3  -2 19994.3 560.617   3
  -1   3  -1 954.872 47.9440   1
   1  -3   1 856.134 45.6560   1
   1  -3   1 834.207 39.0786   3
   1  -3   4 105.537 18.0209   1
   1  -3   7 1392.68 61.9630   1
   2   1   7 1272.13 69.2379   2
  -1   3  -7 1379.60 61.0535   1
  -1   3 -10 21706.1 603.176   1
  -1   3 -10 22522.5 607.690   3
   2   1  10 21499.6 647.644   3
   1  -3  10 21801.3 606.052   1
   2   1  10 21716.1 634.104   2
   3  -2 -13 34227.4 981.304   3
  -1   3 -13 34153.6 929.582   3
   1  -3  13 32834.1 912.985   1
   2   1  13 34521.9 958.284   2
  -2  -1 -13 32569.9 951.456   2
   2   1  13 34195.9 971.388   3
   2   1  16 50528.2 1398.59   3
   2   1  16 50697.3 1387.29   2
  -1   3 -16 50553.7 1355.38   3
   2   1  16 46726.8 1315.67   1
  -2  -1 -16 49755.7 1377.14   2
   3  -2 -16 49407.9 1309.00   1
   3  -2 -16 51121.0 1408.87   3
  -2  -1 -19 54613.5 1586.19   2
   2   1  19 58279.5 1614.55   3
  -1   3 -19 58267.1 1570.40   3
   3  -2 -19 55259.4 1617.72   3
  -2  -1 -22 21075.1 674.325   2
  -1   3 -22 20814.1 669.500   2
   3  -2 -22 20654.4 698.740   3
   3  -2 -22 20720.8 693.026   2
   2   1  22 21485.2 695.222   3
  -1   3 -22 22796.7 661.996   3
  -1   3 -25 3766.37 185.961   3
   3  -2 -25 3268.78 216.206   3
  -2  -1 -25 3320.85 195.882   2
   3  -2 -25 3408.90 216.841   2
   2   1  25 3585.78 217.574   3
  -1   3 -25 3287.38 193.867   2
   3  -2 -28 822.367 126.706   3
  -1   3 -28 873.295 112.788   2
  -1   3 -28 977.276 105.873   3
  -2  -1 -28 539.179 109.040   2
   3  -2 -28 701.867 124.250   2
  -2  -1 -31 592.752 113.479   2
   3  -2 -31 472.016 123.620   3
   3  -2 -31 436.923 119.499   2
  -1   3 -31 369.410 103.063   2
  -1   3 -34 761.000 119.964   2
   3  -2 -34 511.655 128.324   2
   3  -2 -34 728.584 136.837   3
   3  -2 -37-21.6179 115.738   2
  -1   3 -37 48.9188 97.5975   2
   3  -2 -37 14.0734 111.240   3
   3  -2 -40-145.218 133.795   2
   3  -2 -40-7.31597 116.794   3
  -1   3 -40-117.623 108.530   2
  -1   3 -43 55.0504 107.379   2
   3   0 -42-131.719 132.406   2
   3   0 -39-72.6571 119.237   2
   3   0 -39-71.3922 124.995   3
  -3   3 -36-185.360 117.698   2
   3   0 -36-104.011 124.583   2
   3   0 -36-171.167 131.841   3
   3   0 -33-96.4745 115.786   2
   0  -3 -33 118.210 108.033   2
   3   0 -33-59.9706 116.737   3
  -3   3 -33-77.9244 105.133   2
   3   0 -30 354.782 105.309   2
   0  -3 -30 254.588 97.9181   2
   3   0 -30 107.537 107.029   3
  -3   3 -30 253.699 93.2132   2
   3   0 -27 996.006 139.545   3
   0  -3 -27 1483.95 150.475   2
  -3   3 -27 1262.73 125.443   2
   0  -3 -27 1511.37 151.756   3
   3   0 -27 1369.43 147.000   2
   0  -3 -24 3421.48 204.357   2
   0  -3 -24 3756.15 222.852   3
  -3   3 -24 3525.74 189.765   2
   3   0 -24 3545.26 212.636   3
   3   0 -24 3557.60 211.612   2
   3  -3  21 1419.40 55.6377   1
  -3   3 -21 1363.72 109.268   2
   0   3  21 1455.98 138.266   3
   0  -3 -21 1334.00 132.628   3
   0  -3 -21 1508.70 124.512   2
   3   0 -21 1576.97 127.868   3
  -3   3 -18 1777.93 114.245   2
   0  -3 -18 1778.17 139.825   3
   3   0 -18 2145.39 139.884   3
   3  -3  18 2014.62 78.3558   1
   0   3  18 1845.38 145.953   3
   3  -3  18 2250.06 117.518   3
   3  -3  15 11030.1 347.524   3
   0   3  15 10596.8 313.382   1
  -3   3 -15 11139.9 348.879   2
   0  -3 -15 10918.8 395.361   3
   3  -3  15 10769.1 316.187   1
   0   3  15 11548.3 398.066   3
   0   3  15 11036.6 378.327   2
  -3   3 -12 1558.71 79.0948   2
   0   3  12 1506.33 96.3666   2
   0   3  12 1488.02 68.3490   1
   0   3  12 1511.79 106.500   3
   3  -3  12 1554.34 77.3853   3
   3  -3  12 1694.29 69.6933   1
   0  -3  -9 28443.0 834.794   2
  -3   3  -9 29932.3 807.283   2
   0   3   9 30430.8 840.362   2
   0   3   9 29855.4 811.107   1
   3  -3   9 28817.7 805.171   3
   3  -3   9 29730.6 806.270   1
   0   3   9 29707.5 855.357   3
   0  -3  -6 77096.2 2077.03   3
   0   3   6 78048.1 2050.31   1
   0   3   6 80289.8 2064.58   2
  -3   3  -6 74402.7 2027.23   2
   0   3   6 79869.5 2078.85   3
   0   3   3 23162.9 667.806   3
   0   3   3 24021.0 659.214   1
   0  -3   0 12685.8 357.203   1
   3  -3   0 11896.7 333.295   2
   0   3   0 12121.7 356.566   1
   3  -3  -3 984.063 51.5395   2
   0  -3   3 1086.65 57.1245   1
   3  -3  -6 8375.32 265.796   2
   0  -3   6 8209.82 255.326   1
   3   0   9 8894.49 281.552   2
   3  -3  -9 9024.11 298.009   2
   0   3  -9 8560.67 266.922   1
   0  -3   9 9165.81 274.505   1
   3  -3 -12 49146.9 1276.52   1
   3  -3 -12 49722.7 1335.95   2
   0   3 -12 48043.1 1281.14   1
   3   0  12 48586.0 1330.08   3
   0   3 -12 48191.8 1295.63   3
   3  -3 -15 46052.7 1245.67   1
   3   0  15 46680.9 1301.72   2
   0   3 -15 47777.3 1285.10   3
   3   0  15 46220.1 1313.89   3
  -3   0 -15 46569.4 1296.34   2
   3  -3 -15 45988.8 1334.91   3
  -3   0 -18 46158.7 1291.27   2
   3  -3 -18 45323.3 1219.66   1
   3  -3 -18 46145.7 1333.26   3
   0   3 -18 46490.8 1279.11   3
   3   0  18 45210.0 1309.38   3
   3   0  21 20285.5 671.100   3
   3  -3 -21 21263.2 693.233   3
   0   3 -21 21401.0 645.468   3
  -3   0 -21 20997.6 656.105   2
   0   3 -24 662.621 93.6424   2
   3  -3 -24 434.847 99.8094   2
   3   0  24 737.444 101.622   3
   3  -3 -24 593.838 105.049   3
   0   3 -24 652.604 87.2855   3
  -3   0 -24 700.230 94.5721   2
   3  -3 -27 5.86291 89.6612   3
  -3   0 -27 45.5424 65.4494   2
   3  -3 -27 100.785 82.9311   2
   0   3 -27 74.7654 67.6156   3
   0   3 -27 61.0766 71.3605   2
   3   0  27 138.074 83.6992   3
   0   3 -30 418.300 88.1061   3
   0   3 -30 385.990 94.3326   2
   3  -3 -30 362.139 107.604   2
   3  -3 -30 595.750 120.343   3
   0   3 -33 900.824 118.721   3
   3  -3 -33 1029.39 149.440   2
   3  -3 -33 1063.27 150.125   3
   0   3 -33 1125.33 135.482   2
   3  -3 -36 376.556 121.200   3
   0   3 -36 374.818 109.517   2
   3  -3 -36 142.977 120.685   2
   0   3 -39-39.2826 94.8024   2
   3  -3 -39-15.1424 103.557   3
   3  -3 -39-167.881 131.447   2
   0   3 -42 6.97388 101.352   2
   1   3 -41-125.773 118.407   2
   3  -4 -41-95.5462 130.683   2
   3  -4 -38-85.8087 122.519   3
   3  -4 -38 67.7094 116.214   2
   1   3 -38 13.3192 100.766   2
   3  -4 -35-51.9270 116.906   3
   3  -4 -35-70.9015 105.008   2
   1   3 -35-77.2549 89.2898   3
   1   3 -35-99.3833 114.039   2
   3  -4 -32-144.439 113.724   2
   1   3 -32-131.648 106.352   2
   1   3 -32-56.1164 93.9220   3
   3  -4 -32-77.8177 109.310   3
   3  -4 -29 60.1236 79.7054   2
   3  -4 -29 117.051 88.5483   3
   4  -1  29-21.4943 85.2226   3
   1   3 -29-10.5682 82.4498   2
   1   3 -29 4.31706 67.5840   3
   3  -4 -26 3510.98 213.405   2
   1   3 -26 3302.14 191.698   3
   4  -1  26 3779.65 212.007   3
   3  -4 -26 3472.27 227.917   3
   4  -1  23 548.176 92.3761   3
  -4   1 -23 503.432 85.2903   2
   3  -4 -23 595.507 106.118   3
   1   3 -23 458.504 80.5187   3
   3  -4 -20 9834.00 287.355   1
   1   3 -20 10431.7 354.258   3
   4  -1  20 9996.29 369.020   3
   3  -4 -20 9656.19 389.562   3
   1   3 -17 18443.5 459.101   3
   3  -4 -17 18412.7 514.607   3
   4  -1  17 18206.8 478.787   3
   3  -4 -17 18497.7 399.451   1
   4  -1  14 44684.3 1261.20   2
   1   3 -14 46032.4 1231.53   1
   3  -4 -14 45420.9 1226.92   1
   3  -4 -14 45785.7 1290.51   2
   4  -1  14 44688.3 1276.92   3
   3  -4 -11 42599.7 1166.92   1
   1   3 -11 43533.7 1173.31   1
   3  -4 -11 42971.4 1211.38   2
   4  -1  11 43453.2 1186.06   2
   3  -4  -8 29436.7 842.803   3
   3  -4  -8 28425.8 794.155   1
   4  -1   8 28291.6 798.860   2
   1   3  -8 29968.3 803.746   1
   3  -4  -8 28711.7 820.564   2
   3  -4  -5 6791.73 224.789   2
   3  -4  -5 7117.69 244.431   3
   3  -4  -2 12275.8 352.482   2
   3  -4   1 1277.67 61.9781   1
   1   3   1 1171.82 68.2337   1
   3  -4   4 7287.52 224.833   1
   1   3   4 7011.66 235.647   1
   3  -4   7 68540.1 1837.76   1
   1   3   7 68539.8 1878.15   3
   1   3   7 68873.7 1851.11   1
   1   3  10 37382.5 997.042   1
   3  -4  10 37008.6 986.702   1
   1   3  10 36830.1 1021.21   2
   1   3  10 36715.4 1039.08   3
   3  -4  10 34599.1 969.752   3
   3  -4  13 130504. 3505.41   3
   3  -4  13 133085. 3505.86   1
   1   3  13 137072. 3558.79   2
   1   3  13 135181. 3576.94   3
   1   3  13 130014. 3509.88   1
  -3   4 -16 67586.4 1812.52   2
   1   3  16 68679.2 1849.67   2
   1   3  16 69715.1 1876.67   3
   1   3  16 63404.3 1778.91   1
   3  -4  16 67308.5 1780.74   1
   1   3  19 27222.2 765.331   1
   1   3  19 30540.3 863.649   2
  -3   4 -19 27946.3 820.703   2
   4  -1 -19 29299.3 874.726   3
  -1  -3 -19 29218.9 853.380   2
   3  -4  19 27499.0 771.043   1
   1   3  19 29851.4 884.294   3
   4  -1 -22 5995.11 286.369   3
   4  -1 -22 5707.58 173.524   1
   4  -1 -22 5813.22 172.658   1
  -1  -3 -22 6317.84 273.946   2
   1   3  22 6820.92 302.056   3
  -3   4 -22 6415.90 252.951   2
  -1  -3 -25 875.276 121.345   2
   4  -1 -25 780.884 139.561   3
  -3   4 -25 704.867 107.146   2
   1   3  25 1006.79 141.245   3
   4  -1 -25 1024.20 135.807   2
  -3   4 -28 186.379 82.5214   2
   4  -1 -28 11.2790 96.3988   3
   4  -1 -28 173.278 93.1206   2
  -3   4 -31 128.098 93.4774   2
   4  -1 -31 221.912 113.008   3
   4  -1 -31 297.972 116.221   2
   4  -1 -34-92.0489 118.667   3
   4  -1 -34-61.9211 119.156   2
  -3   4 -34-41.9379 96.9326   2
   4  -1 -37 27.4137 113.463   3
  -3   4 -37 5.70134 106.887   2
   4  -1 -37-36.8119 126.463   2
   4  -1 -40-46.2176 116.974   2
  -3   4 -40-115.231 116.800   2
   4  -1 -40-14.0189 113.643   3
   4  -1 -43 86.0526 131.686   3
  -3   4 -43 182.077 120.277   2
   2   2 -42-184.035 141.839   2
   2  -4 -39 7.57020 117.393   2
   2   2 -39 112.979 106.153   2
   2   2 -39 261.898 91.5119   3
   2  -4 -36 49.2908 101.946   2
   2   2 -36 49.3481 80.8972   3
   2   2 -36-46.4141 117.570   2
   2  -4 -36 60.1694 110.139   3
   2  -4 -33-21.2320 94.7051   3
   2  -4 -33-157.726 127.670   2
   2   2 -33-83.6576 92.0204   3
   2  -4 -30 86.7974 89.7207   3
   2   2 -30 87.6015 72.0658   3
   2   2 -30-5.62884 84.2650   2
   2  -4 -30-66.5883 97.5301   2
  -4   2 -30-56.6002 90.4326   2
  -4   2 -27 1096.60 115.306   2
   2   2 -27 1244.06 138.127   2
   2  -4 -27 1193.98 138.695   3
   2  -4 -27 1286.53 139.007   2
   2   2 -27 1359.04 124.261   3
  -4   2 -24 1265.21 120.891   2
   2  -4 -24 1750.55 154.662   3
   4  -2  24 1402.69 132.812   3
   2   2 -24 1602.98 132.875   3
   2  -4 -24 1582.18 142.439   2
   4  -2  21 4073.44 190.740   3
   4  -2  21 3746.64 122.090   1
   2   2 -21 3942.54 194.236   3
   2  -4 -21 3990.09 221.530   3
  -4   2 -21 3570.10 178.740   2
   2   2 -21 3624.16 122.446   1
   2  -4 -18 8588.02 354.810   3
   2  -4 -18 9086.23 266.994   1
   2   2 -18 9211.72 329.859   3
   4  -2  18 9319.61 324.192   3
  -4   2 -18 8886.30 312.645   2
   2  -4 -15 62188.5 1697.13   1
   4  -2  15 61696.9 1739.23   3
   2   2 -15 64894.4 1698.02   1
  -2   4  15 65031.3 1794.12   3
  -4   2 -15 63715.9 1729.83   2
   4  -2  12 89103.9 2434.25   2
   4  -2  12 86310.9 2443.37   3
   2  -4 -12 90189.7 2464.14   2
  -2   4  12 90946.5 2468.12   2
  -2   4  12 93083.1 2497.33   3
   2  -4 -12 93407.5 2418.43   1
   2   2 -12 91798.9 2418.88   1
   2  -4  -9 25973.5 751.082   2
  -2   4   9 27454.2 780.412   3
   4  -2   9 26568.4 725.038   2
  -2   4   9 25636.4 750.890   2
   2  -4  -9 27076.1 724.197   1
  -2   4   9 25369.6 721.329   1
   2  -4  -9 24675.3 765.297   3
  -2   4   6 68039.4 1840.49   1
   2  -4  -6 68384.5 1854.36   2
   2  -4  -6 68054.2 1872.80   3
  -2   4   6 71619.7 1878.00   3
   2  -4  -3 1900.28 91.2567   3
  -2   4   3 1903.63 82.1872   1
   2  -4   0 1981.09 80.5246   3
  -2   4   0 1889.12 82.2742   1
   2  -4   0 1982.75 83.4850   1
   2  -4   3 5437.77 178.636   1
   2  -4   6 54420.4 1465.98   1
   2   2   9 80271.5 2192.63   3
  -2   4  -9 79872.2 2146.49   1
   2  -4   9 81673.5 2149.52   1
   2   2   9 79816.6 2171.71   2
   2   2  12 141403. 3847.93   3
   2  -4  12 142457. 3788.28   1
   2   2  12 139468. 3798.52   1
   2   2  12 143226. 3827.35   2
  -2   4 -12 146537. 3781.05   3
   2   2  15 149154. 3901.97   2
   2  -4  15 140344. 3841.31   1
   2   2  15 146140. 3919.77   3
   4  -2 -15 146428. 3923.71   3
   2   2  15 142521. 3848.80   1
  -2   4 -15 151668. 3855.02   3
   2   2  18 21161.0 628.660   1
   4  -2 -18 23166.2 727.733   3
   2   2  18 24663.2 710.187   2
  -2   4 -18 24548.9 667.494   3
   2   2  18 23693.3 726.994   3
   2  -4  18 22510.1 635.194   1
   2   2  21 5807.03 186.274   1
  -2   4 -21 7143.46 250.356   3
   2   2  21 7113.14 301.660   3
   4  -2 -21 6250.41 185.351   1
  -2   4 -21 6940.93 265.096   2
   4  -2 -21 6761.91 303.042   3
   2   2  24 1031.75 137.376   3
   4  -2 -24 982.933 128.698   2
   4  -2 -24 1077.74 136.591   3
  -2   4 -24 907.873 113.433   2
   2   2  27 208.666 99.6525   3
   4  -2 -27 192.199 94.4971   2
   4  -2 -27 159.596 96.9152   3
  -2   4 -27 94.4194 78.1312   2
   4  -2 -30 2163.33 191.637   3
  -2   4 -30 2054.48 169.355   2
   4  -2 -33 320.943 122.196   3
  -2   4 -33-5.19800 106.683   2
   4  -2 -33 114.980 114.628   2
   4  -2 -36 211.864 120.343   3
  -2   4 -36 62.9374 108.042   2
   4  -2 -36 78.6795 111.272   2
   4  -2 -39 377.064 137.557   3
  -2   4 -39 196.337 119.178   2
   4  -2 -39 366.947 143.208   2
   4  -2 -42 270.021 133.441   3
  -2   4 -42 149.382 120.477   2
   3   1 -40 7.36969 109.148   2
   3   1 -40-135.043 118.222   3
   3   1 -37 105.990 106.557   2
   3   1 -37 48.8217 105.131   3
  -4   3 -34 296.885 100.745   2
   3   1 -34 459.955 124.672   2
   1  -4 -34 404.700 115.279   2
   3   1 -34 319.020 114.727   3
  -4   3 -31 988.898 123.530   2
   1  -4 -31 1184.20 147.726   3
   3   1 -31 1176.03 141.012   2
   1  -4 -31 885.672 131.158   2
   3   1 -31 912.895 129.415   3
   3   1 -28 422.183 101.065   2
   1  -4 -28 551.829 111.347   3
   1  -4 -28 354.371 92.7402   2
   3   1 -28 255.695 86.4555   3
  -4   3 -28 389.130 83.6202   2
   3   1 -25 230.604 92.1553   3
   1  -4 -25 170.655 93.6072   2
   1  -4 -25 315.694 96.5671   3
  -4   3 -25 142.389 79.7994   2
   1  -4 -22 5.32465 74.3727   3
   1  -4 -22-71.5392 88.5022   2
   3   1 -22 11.3902 23.3663   1
  -4   3 -22-77.3994 75.7302   2
   4  -3  22 121.894 53.0080   3
   4  -3  22 27.2931 20.4951   1
   3   1 -22 139.869 65.2530   3
   4  -3  19 7642.21 229.693   1
   4  -3  19 7695.46 278.020   3
  -1   4  19 7556.20 324.424   3
  -4   3 -19 7122.66 272.401   2
   3   1 -19 7335.88 297.024   3
   1  -4 -19 7877.06 326.218   3
   1  -4 -16 11860.3 426.900   3
  -1   4  16 11828.0 343.757   1
   4  -3  16 12191.7 347.363   1
  -1   4  16 11930.0 431.206   3
  -1   4  16 11794.8 411.074   2
   4  -3  16 11306.6 374.956   3
  -4   3 -16 11627.5 375.702   2
  -4   3 -13 2160.29 101.020   2
   4  -3  13 2226.23 105.686   3
   1  -4 -13 2304.56 95.4189   1
  -1   4  13 2452.82 145.892   3
  -1   4  13 2127.61 91.1114   1
  -1   4  13 2380.88 131.112   2
  -1   4  10 279.053 31.5441   1
   1  -4 -10 300.868 32.8119   1
  -1   4  10 332.044 50.2097   2
   1  -4 -10 296.267 45.8577   2
  -4   3 -10 294.892 31.5128   2
  -1   4  10 246.506 55.4308   3
  -1   4   7 2638.27 131.180   3
  -1   4   7 2655.60 117.979   2
   1  -4  -7 2713.88 106.577   1
   1  -4  -7 2705.23 130.043   3
  -1   4   7 2656.80 105.777   1
   4  -3   7 2552.42 88.9829   2
  -1   4   4 9445.98 314.966   3
   1  -4  -4 10158.0 316.781   3
  -1   4   4 10076.9 302.858   1
  -1   4   1 125.560 24.5949   1
   1  -4  -1 140.861 25.1382   1
   1  -4  -1 113.265 22.5643   3
   1  -4   2 37112.0 1015.00   1
   1  -4   5 3124.97 119.757   1
   1  -4   8 7708.68 243.447   1
  -1   4  -8 7669.47 241.717   1
   3   1  11 45251.3 1291.47   3
  -1   4 -11 46135.0 1246.51   1
   3   1  11 46103.8 1273.69   2
   1  -4  11 45072.2 1248.70   1
  -1   4 -11 46767.6 1236.82   3
   3   1  14 2973.99 147.774   2
  -1   4 -14 3079.06 122.400   3
  -1   4 -14 3093.77 115.884   1
   3   1  14 3060.89 163.098   3
   1  -4  14 2994.38 122.315   1
   3   1  17 740.720 83.6153   2
   3   1  17 839.180 94.0102   3
  -1   4 -17 740.959 64.3627   3
   4  -3 -17 736.497 45.8707   1
   4  -3 -17 664.259 91.8118   3
   4  -3 -20 6261.74 282.548   3
   4  -3 -20 5793.69 178.256   1
   3   1  20 5370.48 183.801   1
   3   1  20 5911.60 267.327   3
  -1   4 -20 6181.34 225.319   3
  -1   4 -23 570.854 74.3066   3
   4  -3 -23 597.088 103.832   3
   3   1  23 383.493 100.450   3
   3   1  26-125.728 98.4061   3
   4  -3 -26-11.1682 77.6722   2
   4  -3 -26 28.8187 78.4828   3
  -1   4 -26-68.8276 88.0745   2
  -1   4 -26 101.073 54.7843   3
  -1   4 -29-14.4345 85.7520   2
  -1   4 -29 86.0335 64.4297   3
   4  -3 -29 134.550 92.2145   2
   4  -3 -29-12.8178 92.7861   3
   3   1  29-96.7701 109.150   3
   4  -3 -32-46.3042 106.908   2
   4  -3 -32 47.6669 88.6031   3
  -1   4 -32-79.8245 110.416   2
  -1   4 -35-86.2031 107.245   2
   4  -3 -35-14.2150 109.791   2
   4  -3 -35 115.719 96.3163   3
  -1   4 -38-49.2384 117.251   2
   4  -3 -38 99.2872 121.149   2
   4  -3 -38 291.947 126.466   3
  -1   4 -41-191.197 125.045   2
   4  -3 -41-7.80339 110.372   3
   4  -3 -41-104.529 128.771   2
  -1   4 -44-13.7900 111.433   2
   4   0 -44 87.8017 120.085   3
   4   0 -41-31.0052 120.162   2
   4   0 -41-134.315 132.400   3
   4   0 -38 67.1686 125.033   2
  -4   4 -38 176.787 102.443   2
   4   0 -38 52.8867 112.340   3
   4   0 -35 896.316 156.380   3
   4   0 -35 1242.05 170.958   2
  -4   4 -35 1124.20 135.826   2
  -4   4 -32 4887.60 253.295   2
   4   0 -32 4747.75 279.517   2
   4   0 -32 5146.50 283.509   3
   4   0 -29 3091.49 217.028   3
   4   0 -29 3341.45 221.304   2
   0  -4 -29 3868.92 226.655   2
  -4   4 -29 3150.04 187.753   2
   0  -4 -26 126.183 82.8834   3
  -4   4 -26-7.60468 53.5525   2
   0  -4 -26 35.8161 78.7744   2
   4   0 -23 445.206 101.423   3
  -4   4 -23 573.889 83.6592   2
   0   4  23 538.935 117.039   3
   0  -4 -23 678.484 104.409   2
   4   0 -23 578.065 37.5197   1
   4  -4  23 608.799 42.9157   1
   0  -4 -23 658.769 108.856   3
   4  -4  20 2754.41 106.771   1
   4  -4  20 2661.83 138.403   3
   4   0 -20 2730.55 174.485   3
   0   4  20 2760.95 183.591   3
   0   4  20 2788.25 102.490   1
   0  -4 -20 2543.20 161.291   2
  -4   4 -20 2846.37 142.172   2
   0  -4 -20 2856.90 181.702   3
   0   4  17 11213.2 409.083   3
   0  -4 -17 10625.9 406.102   3
   0   4  17 10385.1 317.580   1
   4  -4  17 10482.4 344.066   3
  -4   4 -17 10485.7 346.463   2
   0   4  17 10924.2 385.975   2
   4  -4  17 11127.2 322.315   1
   4  -4  14 5170.79 171.520   1
   4  -4  14 4566.98 172.320   3
   0   4  14 5435.65 236.011   3
  -4   4 -14 4928.54 178.778   2
   0   4  14 4755.61 169.733   1
   0   4  14 5047.31 214.547   2
   4  -4  11 4770.59 167.439   3
   0   4  11 5109.28 222.811   3
   4  -4  11 5492.53 176.203   1
  -4   4 -11 4915.68 169.083   2
   0   4  11 5325.92 181.322   1
   0   4  11 5152.71 206.143   2
   0  -4  -8 14216.3 411.993   1
   0   4   8 14174.9 447.418   3
   0  -4  -8 14048.4 444.385   3
   0   4   8 14026.7 411.894   1
  -4   4  -8 13244.1 382.005   2
   0   4   8 14315.8 429.359   2
   0   4   5 77379.0 2105.71   1
   0   4   5 79757.4 2125.93   3
   0   4   2 22265.3 635.764   1
   0  -4   1 4489.88 161.439   1
   4  -4  -1 4332.09 140.127   2
   0   4  -1 4288.22 160.597   1
   0  -4   4 1203.08 69.3964   1
   4  -4  -4 1096.82 62.9791   2
   4  -4  -7 11374.0 354.574   2
   0  -4   7 11373.3 346.469   1
   0   4  -7 10944.1 341.080   1
   0   4 -10 3698.46 143.169   1
   4   0  10 3868.62 152.649   2
   4  -4 -10 4048.53 170.428   2
   0  -4  10 3944.88 150.865   1
   4  -4 -10 3908.50 140.189   1
   4  -4 -13 137.841 50.5901   2
   4   0  13 130.973 41.6966   2
   0   4 -13 326.514 38.0557   1
   4   0  13 350.671 57.8174   3
   4  -4 -13 145.340 29.1138   1
   4   0  16 2746.49 146.142   2
   4  -4 -16 2976.26 164.241   2
   0   4 -16 2856.03 128.960   3
   4   0  16 2744.17 156.271   3
   0   4 -16 2895.91 113.381   1
   4  -4 -16 2787.24 174.044   3
   4  -4 -16 2817.00 109.024   1
   4   0  19 1197.29 114.299   3
   0   4 -19 1482.58 95.8208   3
   4  -4 -19 1385.61 128.193   3
   4   0  19 1400.19 112.087   2
   4  -4 -19 1355.01 66.1463   1
   4   0  22 17.2606 22.6430   1
   4  -4 -22 40.0956 21.0980   1
   0   4 -22-2.92879 47.6281   3
   4   0  22-22.6756 77.0456   3
   4  -4 -22-5.38675 73.0320   3
   4   0  25-55.8869 76.8772   3
   0   4 -25-3.35279 49.6516   3
   4  -4 -25-35.1096 80.0273   3
   4  -4 -28 59.7505 82.0760   2
   0   4 -28 81.8971 60.3634   3
   0   4 -28 49.0718 74.0010   2
   4   0  28 39.3153 84.3928   3
   4  -4 -28 12.8736 81.7430   3
   0   4 -31 56.2668 73.2777   3
   4   0  31 48.8292 105.436   3
   0   4 -31 63.7011 82.5819   2
   4  -4 -31 144.321 100.281   3
   4  -4 -31 142.555 99.7800   2
   4  -4 -34 88.4854 103.009   3
   4  -4 -34-42.3075 100.119   2
   0   4 -34 214.691 99.6861   2
   4  -4 -37 891.199 160.437   3
   4  -4 -37 1041.33 165.017   2
   0   4 -37 739.554 132.722   2
   4  -4 -40 256.427 126.325   2
   4  -4 -40 16.1342 119.076   3
   0   4 -40 177.800 115.319   2
   0   4 -43 175.691 119.141   2
   1   4 -42 34.8435 108.737   2
   4  -5 -39 39.6124 118.602   2
   4  -5 -39-140.855 149.157   3
   1   4 -39 114.502 105.787   2
   4  -5 -36 343.385 142.240   3
   1   4 -36 192.141 86.1378   3
   4  -5 -36 571.621 133.320   2
   1   4 -36 431.117 111.324   2
   1   4 -33 109.983 82.2399   3
   4  -5 -33 112.267 121.800   3
   1   4 -33 297.201 104.231   2
   4  -5 -33 257.723 108.068   2
   1   4 -30 502.762 100.736   2
   5  -1  30 374.180 104.804   3
   4  -5 -30 341.100 106.004   2
   1   4 -30 323.910 85.7226   3
   4  -5 -30 182.242 116.746   3
   5  -1  27-5.21551 67.2193   3
   1   4 -27-68.9533 77.0698   3
   4  -5 -27-32.2430 97.9222   3
   4  -5 -24 5.98282 84.2522   3
   1   4 -24 10.2923 62.9778   3
   5  -1  24-42.0003 68.0802   3
   5  -1  21 158.878 63.6796   3
   1   4 -21 192.517 54.7340   3
   4  -5 -21 145.209 32.3586   1
   4  -5 -21 64.2653 77.3299   3
   4  -5 -18 163.325 63.6883   2
   5  -1  18 176.283 48.4879   2
   5  -1  18 113.414 55.4717   3
   4  -5 -18 176.833 30.8666   1
   4  -5 -18 73.6152 65.4547   3
   1   4 -18 156.100 31.4767   1
   1   4 -18 34.3116 43.9698   3
   4  -5 -15 599.647 51.7317   1
   4  -5 -15 606.867 82.3880   2
   5  -1  15 623.582 66.1123   2
   1   4 -15 687.769 53.8359   1
   5  -1  15 740.212 78.1985   3
   4  -5 -12 226.513 53.5311   2
   4  -5 -12 125.849 32.0650   1
   5  -1  12 122.291 35.4872   2
   1   4 -12 121.861 33.1692   1
   4  -5  -9 4345.21 157.207   1
   1   4  -9 4452.35 165.151   1
   4  -5  -9 4434.06 196.370   3
   4  -5  -9 4072.89 175.934   2
   4  -5  -6 13087.9 396.801   2
   4  -5  -6 12779.1 418.781   3
   4  -5  -3 3849.96 138.031   2
  -4   5   0 30136.5 836.494   2
   4  -5   0 31668.8 862.208   1
   1   4   0 32469.6 878.212   1
   4  -5   3 7946.92 251.894   1
   1   4   3 7671.89 264.225   1
   1   4   6 33632.3 924.574   1
   4  -5   6 31494.0 906.637   1
   1   4   6 33825.5 946.014   3
   1   4   9-8.26805 48.2350   1
   1   4   9 113.181 41.3221   2
   1   4  12 199.085 36.8540   1
   4  -5  12 75.3558 20.0525   3
   1   4  12 92.7417 42.1542   2
  -4   5 -12-6.76849 31.2719   2
   4  -5  12 33.2844 28.4420   1
   1   4  12 194.756 57.5508   3
   1   4  15 2678.36 122.433   1
   1   4  15 2840.68 158.984   2
   4  -5  15 2816.60 122.775   1
  -4   5 -15 2737.96 125.376   2
   1   4  15 2891.42 171.186   3
  -4   5 -18 5511.96 212.956   2
   1   4  18 5515.52 192.229   1
   4  -5  18 5699.62 194.279   1
   1   4  18 5902.34 252.571   2
   1   4  18 5851.90 269.673   3
  -4   5 -21 4770.06 199.503   2
   1   4  21 4694.80 246.836   3
   1   4  21 5081.54 236.291   2
   4  -5  21 4467.78 161.311   1
   5  -1 -21 4433.38 241.404   3
   1   4  21 4435.49 155.550   1
  -4   5 -24 323.179 76.1516   2
   4  -5  24 328.841 40.9344   1
   5  -1 -24 395.844 33.1213   1
   1   4  24 327.008 99.1742   3
   5  -1 -24 324.366 101.943   3
   5  -1 -27 282.623 105.416   3
   1   4  27 612.868 114.865   3
   5  -1 -27 512.980 107.208   2
  -4   5 -27 566.434 84.1964   2
   5  -1 -30 538.751 119.288   3
  -4   5 -30 537.545 98.3836   2
   5  -1 -30 520.957 119.922   2
   5  -1 -33 172.315 111.007   2
  -4   5 -33 401.514 96.2972   2
   5  -1 -33 340.099 122.609   3
   5  -1 -36-7.40457 121.868   2
  -4   5 -36-26.4130 84.3193   2
   5  -1 -36-82.3174 122.258   3
  -4   5 -39 188.039 107.564   2
   5  -1 -39-35.7640 119.463   3
   5  -1 -39-63.0276 124.549   2
   5  -1 -42-66.0057 134.960   3
   3  -5 -40 56.0092 108.476   2
   2   3 -40-56.9080 114.609   2
   2   3 -37 91.4638 85.1083   3
   3  -5 -37-7.45394 107.081   2
   2   3 -37-20.0887 110.533   2
   3  -5 -37-95.9303 136.563   3
   3  -5 -34-34.9027 96.7059   2
   2   3 -34-89.2685 90.1788   3
   2   3 -31-105.493 99.3124   2
   3  -5 -31-26.0043 94.8699   2
   2   3 -31-107.955 88.6308   3
   3  -5 -31-108.124 129.136   3
   3  -5 -28 237.092 89.3736   2
   5  -2  28 40.1234 84.7302   3
   3  -5 -28 13.2136 101.716   3
   2   3 -28-69.4917 92.9421   3
   2   3 -25-8.13562 75.0673   3
   5  -2  25 116.335 19.8525   1
   3  -5 -25 6.03528 81.8582   3
   5  -2  25-62.5481 92.0315   3
   5  -2  22 1412.85 125.339   3
   3  -5 -22 1626.88 151.993   3
   2   3 -22 1481.97 125.208   3
   2   3 -19 7934.08 245.265   1
   5  -2  19 7538.33 294.478   3
   3  -5 -19 7716.88 334.789   3
   2   3 -19 7382.92 291.682   3
   3  -5 -19 7746.76 242.216   1
   2   3 -16 20553.4 578.592   1
   5  -2  16 20255.9 621.280   3
   3  -5 -16 20299.8 577.240   1
   5  -2  16 20454.5 610.030   2
   3  -5 -16 19526.8 639.759   2
   3  -5 -13 93979.4 2507.11   1
   2   3 -13 94870.7 2510.13   1
   3  -5 -13 92037.6 2555.51   2
   5  -2  13 93887.6 2523.39   2
   3  -5 -10 44289.7 1191.30   1
  -3   5  10 41222.7 1219.56   2
   2   3 -10 43493.9 1194.31   1
   3  -5 -10 43661.2 1222.29   2
   5  -2  10 44474.9 1192.55   2
   3  -5 -10 43975.9 1247.55   3
   3  -5  -7 238.388 37.3892   2
  -3   5   7 193.222 31.1806   1
   3  -5  -4 32916.4 935.608   3
   3  -5  -4 33491.8 915.667   2
  -3   5   4 32942.6 916.120   1
  -3   5   1 196071. 5201.46   1
   3  -5  -1 195810. 5202.97   3
   3  -5  -1 198233. 5200.00   1
   3  -5   2 121816. 3286.47   3
   3  -5   2 127699. 3301.95   1
   3  -5   5 42080.0 1150.51   1
   3  -5   8 9290.97 292.685   1
   2   3   8 9903.53 330.539   3
  -3   5  -8 9027.92 288.391   1
   2   3   8 9356.92 303.135   1
   2   3  11 104689. 2838.18   3
   3  -5  11 106279. 2781.47   1
   2   3  11 103824. 2812.61   2
   2   3  11 101780. 2793.91   1
   3  -5  14 125627. 3291.03   1
   2   3  14 123097. 3339.72   2
   2   3  14 126015. 3363.51   3
   2   3  14 120674. 3300.63   1
   2   3  17 45611.3 1280.59   1
   2   3  17 47936.0 1344.10   2
   3  -5  17 47032.4 1276.81   1
   2   3  17 48688.7 1366.39   3
  -3   5 -20 9274.65 316.862   2
   2   3  20 9445.14 347.401   2
   5  -2 -20 8544.93 364.375   3
   2   3  20 9362.67 367.942   3
   3  -5  20 8755.67 274.354   1
   2   3  20 8243.84 268.824   1
   2   3  23 513.895 119.925   3
   5  -2 -23 574.862 42.3333   1
   2   3  23 370.980 40.6524   1
   5  -2 -23 648.877 116.821   3
  -3   5 -23 428.820 81.7326   2
  -3   5 -26 11.6787 59.3240   2
   2   3  26 30.4374 84.3255   3
   5  -2 -26 91.2459 81.2885   2
   5  -2 -26 35.0964 90.6669   3
  -3   5 -29-13.1931 74.0801   2
   5  -2 -29-56.2384 96.8508   3
   2   3  29 66.8626 95.6766   3
   5  -2 -29 30.8730 86.5983   2
   5  -2 -32 183.594 115.900   2
   5  -2 -32 300.999 129.421   3
  -3   5 -32 38.5858 93.3600   2
  -3   5 -35-133.369 100.473   2
   5  -2 -35 87.4849 109.531   2
   5  -2 -35 119.493 109.675   3
   5  -2 -38 177.826 116.653   2
   5  -2 -38 199.306 123.001   3
  -3   5 -38 132.109 101.676   2
  -3   5 -41-24.4508 105.856   2
   5  -2 -41 92.2465 119.148   3
   5  -2 -44-61.3476 136.319   3
  -3   5 -44 45.5012 110.117   2
   3   2 -41 5.74274 95.6322   3
   3   2 -41-22.5657 116.193   2
   3   2 -38 40.5852 90.4672   3
   3   2 -38 7.11555 109.173   2
   3   2 -35 139.799 108.705   2
   2  -5 -35 253.717 110.815   2
   3   2 -35 205.656 97.4232   3
   3   2 -32 310.249 96.5177   3
   2  -5 -32 343.675 113.683   2
   3   2 -32 260.259 104.885   2
   2  -5 -32 65.1609 113.158   3
   3   2 -29-53.9578 77.7969   3
   2  -5 -29 59.5493 84.2021   2
   2  -5 -29-73.7468 104.262   3
   5  -3  26-97.7322 81.1148   3
   2  -5 -26-56.8294 94.8695   3
  -5   3 -26 38.5561 61.3466   2
   3   2 -26-13.9147 70.6765   3
   2  -5 -26-5.43222 73.3256   2
   2  -5 -23 1095.39 132.676   3
   5  -3  23 891.596 54.5465   1
   3   2 -23 1052.23 112.311   3
  -5   3 -23 893.005 97.3946   2
   5  -3  23 977.785 104.702   3
   5  -3  20 252.069 32.4024   1
   3   2 -20 161.249 55.3776   3
   5  -3  20 177.580 49.9290   3
   2  -5 -20 144.467 71.3664   3
  -5   3 -20 179.489 49.4939   2
   3   2 -17 3980.89 144.951   1
  -5   3 -17 4103.90 171.546   2
   2  -5 -17 4132.73 148.125   1
  -2   5  17 4272.33 225.027   3
   5  -3  17 4088.82 177.350   3
  -2   5  14 10943.6 379.887   2
   5  -3  14 10275.8 348.087   3
   2  -5 -14 11051.6 330.575   1
   2  -5 -14 10727.3 374.846   2
  -2   5  14 10546.0 325.101   1
  -2   5  14 10981.9 404.135   3
   5  -3  11 1101.77 63.0179   2
   2  -5 -11 1146.09 67.1130   1
  -2   5  11 1062.43 102.920   3
  -2   5  11 1087.26 65.2212   1
   2  -5 -11 1048.23 80.7650   2
  -2   5  11 1051.04 85.6131   2
   2  -5  -8 3224.72 154.381   3
  -2   5   8 3322.50 159.885   3
   5  -3   8 3039.55 108.727   2
   2  -5  -8 3154.00 125.406   1
  -2   5   8 2921.40 122.264   1
   2  -5  -8 3084.02 137.046   2
  -2   5   5 3606.06 140.064   1
   2  -5  -5 3746.97 158.723   3
  -2   5   2 2132.06 96.4801   1
   2  -5  -2 1976.97 96.9500   3
  -2   5  -1 437.063 41.2649   1
   2  -5   1 369.035 39.0411   1
   2  -5   1 477.650 37.0105   3
   2  -5   4 12803.8 384.927   1
   2  -5   7 6964.62 225.834   1
  -2   5  -7 6564.40 222.807   1
   3   2  10 9574.21 341.705   3
  -2   5 -10 9761.92 303.318   1
   2  -5  10 9832.27 304.379   1
   3   2  13 21441.9 637.337   2
  -2   5 -13 20385.0 597.794   1
   3   2  13 20796.0 659.348   3
   2  -5  13 20631.1 601.258   1
  -2   5 -13 21547.0 579.950   3
   3   2  16 292.678 46.6600   1
   2  -5  16 338.009 44.2599   1
   5  -3 -16 249.199 72.3225   3
   3   2  16 132.098 77.4297   3
   3   2  16 230.801 59.4049   2
  -2   5 -16 303.006 39.4919   3
   3   2  19 1482.28 114.705   2
   3   2  19 1389.18 78.8141   1
   5  -3 -19 1470.22 136.558   3
   2  -5  19 1550.77 82.6213   1
  -2   5 -19 1428.69 87.5277   3
   3   2  19 1417.67 129.498   3
   5  -3 -22 284.191 34.0434   1
   3   2  22 282.225 98.9408   3
   3   2  22 344.459 80.9560   2
   3   2  22 341.978 38.2111   1
   5  -3 -22 486.565 104.657   3
  -2   5 -22 281.784 57.1485   3
   5  -3 -25 4498.33 248.843   3
  -2   5 -25 3937.92 207.652   2
   3   2  25 4023.80 244.652   3
   3   2  28 124.481 114.118   3
   5  -3 -28 419.146 104.793   2
  -2   5 -28 326.837 89.2021   2
   3   2  31 61.1834 101.035   3
   5  -3 -31-27.1382 101.566   3
  -2   5 -31-132.869 118.723   2
   5  -3 -31 133.040 103.102   2
   5  -3 -34 86.1220 105.885   2
   5  -3 -34 129.058 101.790   3
  -2   5 -34-64.2035 112.252   2
  -2   5 -37-109.606 111.569   2
   5  -3 -37-7.54402 102.276   2
   5  -3 -37 166.573 113.347   3
   5  -3 -40 87.5117 116.068   3
   5  -3 -40 24.2847 107.321   2
  -2   5 -40-216.622 127.213   2
   5  -3 -43 56.0093 122.344   3
  -2   5 -43-104.442 112.740   2
   4   1 -42 153.040 118.514   3
   4   1 -39 515.246 149.780   2
   4   1 -39 361.318 131.258   3
   4   1 -36 1097.40 154.893   3
   4   1 -36 1227.30 164.709   2
  -5   4 -33 7121.22 318.431   2
   4   1 -33 6996.38 351.954   2
   4   1 -33 7583.56 348.983   3
   4   1 -30 8367.74 373.326   2
   1  -5 -30 8023.37 367.082   2
   1  -5 -30 8209.17 393.206   3
  -5   4 -30 8259.16 335.715   2
   4   1 -30 8099.47 360.188   3
   1  -5 -27 2265.06 175.761   2
  -5   4 -27 2181.33 145.384   2
   4   1 -27 2232.23 175.688   3
   1  -5 -27 2188.72 186.306   3
   4   1 -24 142.263 90.2938   3
   5  -4  24 346.705 36.6183   1
   1  -5 -24 236.710 83.9475   2
   1  -5 -24 265.212 98.4896   3
   4   1 -24 340.364 33.4739   1
   5  -4  24 259.012 70.5072   3
  -5   4 -24 322.954 73.2075   2
   5  -4  21 65.2502 49.4300   3
  -5   4 -21 51.5629 44.1447   2
   5  -4  21 107.413 28.5452   1
   1  -5 -21 16.2754 70.9497   3
  -1   5  21 179.661 77.7924   3
   4   1 -21 4.29434 59.2651   3
  -1   5  18 939.664 115.437   3
  -1   5  18 916.536 59.3084   1
  -1   5  18 1028.04 107.147   2
   5  -4  18 854.358 60.7156   1
   1  -5 -18 1016.86 119.935   3
  -5   4 -18 959.427 77.2380   2
   5  -4  18 861.636 75.3217   3
   5  -4  15 7907.94 278.757   3
  -5   4 -15 8874.62 279.743   2
  -1   5  15 8765.92 348.642   3
  -1   5  15 8472.62 322.441   2
  -1   5  15 8281.65 268.350   1
   1  -5 -15 8797.82 272.795   1
  -1   5  12 63551.3 1763.44   3
  -1   5  12 63783.0 1732.00   2
   1  -5 -12 64091.5 1691.79   1
  -5   4 -12 62863.1 1677.72   2
  -1   5  12 59283.7 1687.00   1
   1  -5  -9 153859. 3997.55   3
  -1   5   9 149857. 3972.25   2
  -1   5   9 152887. 3999.51   3
   1  -5  -9 150376. 3948.26   1
  -1   5   9 141333. 3945.75   1
   1  -5  -6 138774. 3665.76   3
  -1   5   6 134877. 3637.65   1
  -1   5   6 137452. 3666.58   3
   1  -5  -3 134823. 3614.80   3
  -1   5   3 136298. 3609.53   1
  -1   5   0 87502.1 2343.24   1
   1  -5   0 86936.4 2340.22   1
   1  -5   3 93377.1 2502.15   1
   1  -5   6 62143.1 1685.09   1
   1  -5   9 30873.7 887.465   1
  -1   5  -9 32642.5 888.402   1
  -1   5 -12 62546.4 1660.94   3
  -1   5 -12 61791.6 1683.45   1
   4   1  12 63491.2 1707.91   2
   1  -5  12 61019.5 1687.46   1
   4   1  15 57058.9 1583.57   2
  -1   5 -15 58452.5 1538.07   3
   1  -5  15 55879.5 1550.85   1
  -1   5 -15 55039.9 1540.75   1
   4   1  15 57969.8 1614.82   3
   5  -4 -15 58370.0 1611.61   2
   4   1  18 23331.1 703.665   2
   4   1  18 22530.0 722.080   3
  -1   5 -18 22770.9 644.855   1
   5  -4 -18 23088.9 744.868   3
   5  -4 -18 22760.5 640.789   1
   5  -4 -18 22238.6 725.560   2
  -1   5 -18 22889.0 657.560   3
   4   1  21 4326.08 236.212   3
   4   1  21 4544.49 172.193   1
  -1   5 -21 4855.58 191.080   3
   5  -4 -21 4658.55 159.077   1
   5  -4 -21 4835.02 255.742   3
   4   1  21 4960.84 233.142   2
   5  -4 -24 982.011 128.138   3
  -1   5 -24 959.462 90.8061   3
   5  -4 -24 1126.54 53.5068   1
   4   1  24 982.410 55.4648   1
   5  -4 -27 2270.27 181.746   3
  -1   5 -27 2021.80 161.941   2
   4   1  27 1959.80 180.897   3
  -1   5 -27 2148.36 134.014   3
   4   1  30 108.706 117.781   3
   5  -4 -30 269.091 117.334   3
  -1   5 -30 220.954 96.7319   2
   5  -4 -30 202.137 112.434   2
  -1   5 -33-5.44777 109.902   2
   5  -4 -33 208.791 113.261   2
   5  -4 -36 1176.57 176.538   3
  -1   5 -36 950.226 150.070   2
   5  -4 -36 1224.57 167.724   2
  -1   5 -39 260.607 131.960   2
   5  -4 -39 638.418 155.784   2
   5  -4 -39 645.965 168.521   3
   5  -4 -42 388.313 147.490   3
  -1   5 -42 279.452 125.600   2
   5   0 -43 393.860 145.068   3
   5   0 -40 343.000 150.303   2
   5   0 -40 501.580 142.995   3
   5   0 -37 575.203 144.193   2
   5   0 -37 497.684 141.795   3
   5   0 -34 2814.25 222.537   3
   5   0 -34 3186.32 237.175   2
  -5   5 -34 3226.46 201.832   2
   5   0 -31 8641.60 384.050   3
   5   0 -31 8216.91 384.212   2
  -5   5 -31 8055.46 336.422   2
   5   0 -28 5591.57 297.373   3
  -5   5 -28 6153.37 262.389   2
  -5   5 -25 8864.58 325.858   2
   5   0 -25 8333.70 366.167   3
   5   0 -25 8812.59 256.615   1
   5  -5  25 8273.46 264.710   1
   5   0 -22 1608.51 152.205   3
   0   5  22 2266.51 174.260   3
  -5   5 -22 1895.29 122.584   2
   0   5  22 2089.59 90.5646   1
   0  -5 -22 1841.60 162.561   3
   5  -5  22 2070.11 94.2033   1
   5  -5  19 3686.37 145.906   1
   5  -5  19 3581.73 157.538   3
   0  -5 -19 3906.65 220.519   3
   0   5  19 3919.09 202.754   2
   0   5  19 3467.15 140.352   1
  -5   5 -19 3756.89 161.654   2
   0   5  19 4221.02 226.253   3
   5  -5  16 30526.0 821.458   1
  -5   5 -16 29525.4 824.664   2
   0   5  16 30856.9 886.820   2
   5  -5  16 28563.6 818.276   3
   0   5  16 30532.6 912.516   3
   0   5  13 28364.6 823.421   1
   0   5  13 29476.4 865.026   2
  -5   5 -13 29032.5 807.293   2
   0   5  13 30221.9 892.396   3
   5  -5  13 30880.4 821.954   1
   5  -5  13 28307.0 805.424   3
   0  -5 -10 130356. 3403.54   1
  -5   5 -10 124145. 3364.34   2
   5  -5  10 134137. 3395.62   1
   0   5  10 130246. 3455.69   3
   0  -5 -10 125218. 3446.96   3
   0   5  10 125162. 3403.22   1
   0   5  10 127401. 3428.19   2
   0   5   7 214292. 5649.25   3
   0  -5  -7 211349. 5617.46   1
   0   5   7 211030. 5618.45   1
   0   5   4 99163.2 2665.58   1
   0  -5  -1 119627. 3165.23   1
   0   5   1 121971. 3168.44   1
   5  -5   1 116833. 3119.57   2
   5  -5  -2 193985. 5119.78   2
   0  -5   2 194058. 5147.29   1
   0  -5   5 127123. 3433.21   1
   5  -5  -5 129773. 3424.43   2
   0   5  -8 90543.1 2446.53   1
   5  -5  -8 91358.9 2458.85   2
   0  -5   8 91092.8 2451.56   1
   0   5 -11 136862. 3715.00   1
   5  -5 -11 139466. 3709.64   1
   5   0  11 138958. 3724.34   2
   0  -5  11 140400. 3725.29   1
   5  -5 -11 143564. 3751.08   2
   5   0  14 53107.3 1513.73   3
   5  -5 -14 53975.7 1456.42   1
   5  -5 -14 55465.1 1518.54   2
   0   5 -14 51279.3 1460.62   1
   5   0  14 55191.2 1487.76   2
   5   0  17 33852.4 1009.22   3
   5  -5 -17 35679.7 1018.31   2
   5  -5 -17 33032.5 934.331   1
   5   0  17 34771.7 984.303   2
   0   5 -17 33879.7 949.563   3
   0   5 -17 33193.4 940.000   1
   5  -5 -20 28895.2 912.284   3
   0   5 -20 28119.9 795.051   1
   0   5 -20 28907.6 823.602   3
   5  -5 -20 28433.0 891.704   2
   5   0  20 29580.0 859.653   2
   5   0  20 28821.3 881.350   3
   5  -5 -20 27820.9 790.642   1
   5  -5 -23 6497.06 322.464   3
   5   0  23 6455.73 293.255   3
   0   5 -23 6320.35 247.913   3
   5  -5 -23 6363.39 205.443   1
   5  -5 -26 1973.96 173.679   3
   5   0  26 1513.36 69.4051   1
   5   0  26 1834.94 161.328   3
   0   5 -26 1756.89 121.405   3
   5  -5 -26 1620.93 62.2095   1
   5  -5 -29 532.687 128.870   3
   0   5 -29 640.770 112.097   2
   0   5 -29 503.423 92.8661   3
   5   0  29 571.523 122.989   3
   5  -5 -29 550.787 126.664   2
   5   0  32 1134.90 156.700   3
   5  -5 -32 964.816 170.799   3
   0   5 -32 1058.77 118.013   3
   0   5 -32 1026.58 140.814   2
   5  -5 -32 1042.57 161.848   2
   0   5 -35 1278.55 152.034   2
   5  -5 -35 1063.58 169.972   3
   5  -5 -35 1204.84 177.959   2
   5  -5 -38 510.295 178.914   3
   0   5 -38 614.951 147.493   2
   5  -5 -38 874.366 168.585   2
   0   5 -41 461.983 135.703   2
   5  -5 -41 212.564 156.355   3
   1   5 -43 105.094 108.991   2
   5  -6 -40-78.3869 168.462   3
   1   5 -40 203.706 118.237   2
   5  -6 -37 434.353 151.879   3
   1   5 -37 670.746 127.477   2
   5  -6 -37 742.829 160.110   2
   1   5 -34 1411.46 148.430   2
   1   5 -34 1132.62 118.070   3
   6  -1  34 1458.25 159.665   3
   5  -6 -34 1121.09 168.810   2
   5  -6 -34 1078.65 169.809   3
   1   5 -31 3863.14 226.720   2
   5  -6 -31 3638.34 250.301   2
   5  -6 -31 3261.59 253.728   3
   1   5 -31 3236.90 192.418   3
   6  -1  31 3638.64 231.672   3
   6  -1  28 1508.07 59.3191   1
   5  -6 -28 1614.80 175.849   3
   1   5 -28 1760.07 127.637   3
   6  -1  25 35.1757 66.9402   3
   5  -6 -25 68.8852 35.8823   1
   5  -6 -25 84.1981 87.0487   3
   1   5 -25 49.6006 55.4082   3
   6  -1  22 110.121 69.9152   3
   1   5 -22-28.8704 45.8476   1
   5  -6 -22-76.2840 103.781   3
   1   5 -22-6.00201 59.8893   3
   5  -6 -22-29.5557 47.6532   1
   6  -1  19 3234.43 181.041   3
   5  -6 -19 3229.49 209.767   3
   1   5 -19 3360.22 140.268   1
   1   5 -19 3251.30 155.202   3
   5  -6 -19 3318.41 196.485   2
   6  -1  19 3369.59 169.961   2
   5  -6 -19 3294.07 135.883   1
   6  -1  16 51.6591 50.7163   3
   6  -1  16 94.6321 44.3244   2
   1   5 -16 83.3398 35.8617   1
   5  -6 -16 48.1352 66.2414   2
   5  -6 -16 71.8407 34.2621   1
   6  -1  13 13735.2 433.166   2
   5  -6 -13 13766.8 420.087   1
   1   5 -13 14224.8 428.702   1
   5  -6 -13 13587.5 464.658   2
   1   5 -10 9056.74 297.560   1
   5  -6 -10 8690.75 287.903   1
   5  -6 -10 8971.51 315.597   2
   5  -6 -10 8824.54 336.598   3
   5  -6  -7 21057.8 612.029   1
   1   5  -7 21448.6 623.323   1
   5  -6  -7 20909.7 622.270   2
   5  -6  -7 20959.8 650.938   3
   5  -6  -4 58758.5 1591.93   2
   5  -6  -1 6722.13 214.153   2
  -5   6   1 6816.31 213.444   2
   5  -6  -1 7075.59 236.214   1
   1   5  -1 7047.76 249.426   1
   1   5   2 10793.5 355.735   1
   5  -6   2 10744.7 338.541   1
   1   5   5 7635.99 271.616   1
   5  -6   5 7637.76 256.459   1
   5  -6   8 31643.3 880.517   1
   1   5   8 30879.3 928.701   3
   1   5   8 31009.7 898.705   1
   1   5  11 5404.00 209.483   1
   5  -6  11 5641.94 199.317   1
  -5   6 -11 5454.98 170.670   2
   1   5  11 5451.83 223.359   2
   5  -6  11 5177.75 162.409   3
   1   5  11 6037.56 249.010   3
   1   5  14 32392.4 947.753   3
   5  -6  14 29793.0 836.834   3
  -5   6 -14 30662.0 852.436   2
   1   5  14 30440.6 877.952   1
   5  -6  14 32096.7 869.144   1
   1   5  14 31549.2 916.817   2
   1   5  17 29435.2 888.904   3
  -5   6 -17 27742.4 795.855   2
   5  -6  17 27044.2 775.902   3
   1   5  17 29534.3 861.262   2
   1   5  17 27251.2 797.214   1
   5  -6  17 29171.1 796.935   1
   1   5  20 2179.28 152.529   2
  -5   6 -20 2142.43 118.689   2
   1   5  20 1946.63 104.499   1
   5  -6  20 2515.65 110.386   1
   1   5  20 2393.15 173.661   3
   5  -6  23-1.69344 38.0649   1
  -5   6 -23 44.4293 51.9943   2
   1   5  23 135.613 33.1102   1
   1   5  23-24.7104 89.4456   3
   6  -1 -23-70.4081 102.704   3
   1   5  23 70.2087 70.6336   2
   6  -1 -26 296.926 96.6334   3
   5  -6  26 226.157 41.2839   1
  -5   6 -26 329.267 71.0238   2
   1   5  26 321.311 106.384   3
   1   5  29-51.4150 120.901   3
   6  -1 -29 78.3254 93.0540   2
  -5   6 -29 155.966 72.9116   2
   6  -1 -29 62.2805 96.8763   3
   6  -1 -32-26.4014 114.302   3
  -5   6 -32 97.9528 79.5546   2
   6  -1 -32-27.8101 97.1107   2
   6  -1 -35 373.275 127.442   2
  -5   6 -35 296.233 98.4224   2
   6  -1 -35 281.038 125.793   3
  -5   6 -38 361.761 107.061   2
   6  -1 -38 335.805 124.461   3
   6  -1 -38 468.944 136.518   2
   6  -1 -41 148.115 127.267   3
   6  -1 -44 52.6695 142.036   3
   2   4 -41-136.441 126.725   2
   4  -6 -38 157.693 118.881   2
   2   4 -38 68.3174 111.428   2
   2   4 -38-93.4961 100.910   3
   4  -6 -38-67.6477 152.979   3
   2   4 -35 181.664 86.5639   3
   4  -6 -35 44.3989 109.607   2
   4  -6 -35 56.0415 118.143   3
   2   4 -35 82.4793 99.0299   2
   2   4 -32 354.277 110.223   2
   6  -2  32 143.885 117.855   3
   2   4 -32 382.688 100.938   3
   4  -6 -32 213.985 136.412   3
   4  -6 -32 291.426 121.999   2
   4  -6 -29 190.394 106.352   2
   6  -2  29 206.000 96.7872   3
   2   4 -29 83.8339 80.0848   3
   4  -6 -29 35.4790 126.506   3
   6  -2  26 1188.74 126.681   3
   6  -2  26 1179.05 60.8052   1
   4  -6 -26 1017.41 147.076   3
   2   4 -26 1071.28 115.364   3
   2   4 -26 1093.27 60.4396   1
   4  -6 -23 10720.7 285.781   1
   2   4 -23 10396.8 351.472   3
   4  -6 -23 10502.9 419.210   3
   6  -2  23 10816.7 370.700   3
   4  -6 -20 7557.18 254.860   1
   2   4 -20 8289.27 261.349   1
   4  -6 -20 8101.08 352.728   3
   4  -6 -20 8088.66 334.427   2
   6  -2  20 7640.16 312.408   3
   4  -6 -17 20441.8 648.648   2
   4  -6 -17 19478.2 578.698   1
   6  -2  17 19649.3 627.013   3
   6  -2  17 19836.7 608.233   2
   2   4 -17 20808.8 582.556   1
   6  -2  14 37701.9 1050.64   2
   2   4 -14 37859.4 1039.31   1
   4  -6 -14 37296.5 1036.21   1
   4  -6 -14 36335.8 1085.67   2
   2   4 -11 17592.8 507.834   1
   4  -6 -11 17173.5 502.219   1
   4  -6 -11 16755.0 558.953   3
   4  -6 -11 16787.3 531.847   2
   6  -2  11 16590.7 499.642   2
   4  -6  -8 11326.2 390.320   3
   2   4  -8 11400.0 357.867   1
   4  -6  -8 11281.8 350.899   1
   4  -6  -8 11236.7 366.135   2
   4  -6  -5 73127.4 1950.90   2
   4  -6  -5 70939.0 1975.80   3
  -4   6   2 60329.9 1622.31   2
   4  -6  -2 61694.0 1649.23   3
  -4   6   2 59201.0 1638.37   1
   4  -6   1 30641.7 862.400   3
   4  -6   1 31466.7 870.910   1
   2   4   1 31403.9 883.155   1
  -4   6  -1 31185.7 841.149   2
  -4   6  -1 30520.3 870.307   1
   4  -6   4 13050.5 396.980   1
   2   4   4 13371.9 413.183   1
   4  -6   4 12931.8 372.933   3
   2   4   7 28958.9 836.045   1
   4  -6   7 29083.3 818.564   1
   2   4  10 1606.03 118.794   3
   2   4  10 1652.96 99.1348   1
   4  -6  10 1645.22 87.7113   1
   4  -6  13 22015.9 632.711   1
   2   4  13 21774.7 649.041   1
   2   4  13 21838.2 669.181   2
   2   4  13 21980.7 698.158   3
   2   4  16 2739.70 159.556   2
   4  -6  16 3052.51 128.497   1
   2   4  16 2862.55 177.389   3
   2   4  16 2728.91 131.740   1
   2   4  19 16.5432 60.6021   2
   2   4  19 64.6639 29.7550   1
   2   4  19 121.080 62.4753   3
  -4   6 -19 75.0057 39.8377   2
   4  -6  19 130.126 33.6412   1
   4  -6  22 3864.56 153.105   1
   2   4  22 4202.87 241.015   3
   6  -2 -22 4234.36 238.644   3
   2   4  22 4339.51 219.451   2
   2   4  22 3767.01 147.811   1
  -4   6 -22 3887.64 183.436   2
   2   4  25 977.881 57.8923   1
  -4   6 -25 1141.91 103.457   2
   2   4  25 1274.37 147.350   3
   4  -6  25 974.321 67.1067   1
   6  -2 -25 1083.99 132.233   3
  -4   6 -28 416.288 84.4314   2
   6  -2 -28 492.974 110.498   2
   6  -2 -28 277.148 105.075   3
   2   4  28 342.831 118.849   3
  -4   6 -31 235.270 91.9551   2
   6  -2 -31 331.399 116.012   2
   2   4  31 268.688 137.466   3
   6  -2 -31 100.782 114.300   3
   6  -2 -34-36.7255 103.451   2
  -4   6 -34-93.9771 90.5955   2
   6  -2 -34-62.8846 106.480   3
   6  -2 -37 102.388 112.760   2
  -4   6 -37 139.627 93.5671   2
   6  -2 -37 176.011 116.365   3
   6  -2 -40-123.707 125.692   2
   6  -2 -40-99.2442 121.877   3
  -4   6 -40-96.7552 92.8703   2
  -4   6 -43-115.813 112.978   2
   6  -2 -43-23.7142 125.784   3
   3   3 -42-158.755 131.331   2
   3   3 -39-14.4782 105.607   2
   3   3 -39-5.36941 84.6075   3
   3   3 -36-68.4222 86.4016   3
   3  -6 -36-106.269 136.152   3
   3  -6 -36-22.4739 112.175   2
   3   3 -36-182.062 128.455   2
   3  -6 -33-46.4547 122.789   3
   3  -6 -33-20.7561 109.020   2
   3   3 -33 25.7732 100.202   2
   3   3 -33 40.8554 86.7574   3
   3  -6 -30 776.585 164.035   3
   3   3 -30 1138.22 129.189   3
   6  -3  30 844.172 127.404   3
   3  -6 -30 918.942 150.754   2
   3  -6 -27 107.101 104.499   3
   6  -3  27 104.267 78.7890   3
   3   3 -27 140.437 24.7901   1
   3   3 -27 40.9078 75.7678   3
   6  -3  27 132.459 27.2382   1
   3  -6 -24 1128.06 145.308   3
   3   3 -24 1138.02 116.722   3
   6  -3  24 840.504 113.090   3
   6  -3  24 1097.61 66.7119   1
   6  -3  21 8385.71 317.225   3
   3   3 -21 8134.30 264.624   1
   3  -6 -21 8581.05 266.237   1
   3  -6 -21 8105.92 366.642   3
   3  -6 -18 227.249 38.3216   1
   3   3 -18 291.011 37.8463   1
   3  -6 -18 217.727 65.9794   2
   3  -6 -15 14807.4 445.548   1
   3  -6 -15 15184.5 498.436   2
   3   3 -15 14879.6 445.030   1
   6  -3  15 15193.3 460.237   2
   6  -3  15 14647.4 472.974   3
  -3   6  12 15518.9 520.250   3
   3   3 -12 14899.9 447.820   1
   3  -6 -12 14473.3 480.945   2
   6  -3  12 15728.6 447.297   2
  -3   6  12 14908.3 447.972   1
  -3   6  12 14280.7 481.186   2
   3  -6 -12 14710.7 506.264   3
   3  -6 -12 15246.4 450.832   1
  -3   6   9 424.458 70.5305   3
   3  -6  -9 303.451 40.8419   1
   3  -6  -9 313.299 53.2072   3
   3  -6  -9 285.079 46.7985   2
   6  -3   9 310.952 33.3872   2
  -3   6   9 383.754 43.3404   1
   3  -6  -6 38878.4 1112.12   3
  -3   6   6 39425.7 1087.32   1
   3  -6  -3 8259.17 282.020   3
  -3   6   3 8392.12 275.394   1
  -3   6   0 10262.1 321.156   3
  -3   6   0 10010.1 322.559   1
   3  -6   0 10144.7 315.788   3
   3  -6   0 10303.4 322.359   1
   3  -6   3 52305.9 1426.64   3
   3  -6   3 54759.2 1452.91   1
   3  -6   6 1551.34 85.7617   1
  -3   6  -9 1649.46 86.6059   1
   3  -6   9 1520.03 87.1416   1
   3  -6  12 7087.32 236.670   1
  -3   6 -12 6685.51 232.290   1
   3   3  12 6735.43 258.742   2
   3   3  12 6941.28 282.101   3
   3   3  15 25351.0 782.203   3
   3   3  15 24525.4 727.740   1
   3  -6  15 24732.3 710.650   1
   3   3  15 25314.4 756.335   2
   3   3  18 6819.18 244.859   1
   3   3  18 7235.16 289.426   2
   3   3  18 7153.53 309.996   3
   3  -6  18 7014.37 239.049   1
   3  -6  21 10550.3 336.816   1
   3   3  21 11315.9 430.589   3
   6  -3 -21 11422.1 440.348   3
   3   3  21 10076.1 332.561   1
   3   3  21 11542.4 409.776   2
   3   3  24 6962.64 302.629   2
   3   3  24 6761.62 325.646   3
   3   3  24 6051.96 207.800   1
   6  -3 -24 6734.32 320.649   3
  -3   6 -24 6383.69 265.390   2
   6  -3 -24 6773.53 207.715   1
   3   3  27 720.216 126.074   3
   6  -3 -27 765.536 119.137   3
  -3   6 -27 638.910 87.1682   2
   3   3  27 618.676 32.2569   1
   6  -3 -27 655.924 32.1123   1
   3   3  30 755.193 144.777   3
  -3   6 -30 718.429 109.333   2
   6  -3 -30 847.467 139.182   3
   6  -3 -30 762.323 136.669   2
   6  -3 -33 1204.09 158.298   2
   6  -3 -33 1161.99 157.366   3
  -3   6 -33 1019.99 127.307   2
   3   3  33 939.645 159.629   3
   6  -3 -36 389.873 126.346   3
  -3   6 -36 402.363 104.474   2
   6  -3 -36 362.068 125.294   2
   6  -3 -39-16.1483 114.175   2
  -3   6 -39 40.6032 96.6070   2
   6  -3 -39 180.524 115.808   3
   6  -3 -42 106.211 122.313   3
  -3   6 -42 6.13436 105.664   2
  -3   6 -45 225.922 119.195   2
   6  -3 -45 211.525 134.812   3
   4   2 -40 350.034 136.098   2
   4   2 -40 162.875 108.500   3
   4   2 -37 534.731 121.265   3
   4   2 -37 467.371 137.587   2
   4   2 -34 771.040 126.468   3
   4   2 -34 581.296 138.221   2
   2  -6 -31 523.090 148.037   3
   4   2 -31 946.064 128.835   3
   2  -6 -31 726.619 130.171   2
   6  -4  28 1768.88 142.349   3
   2  -6 -28 1533.76 177.941   3
   2  -6 -28 1737.84 162.670   2
   4   2 -28 1666.89 148.695   3
   6  -4  25 3611.86 136.884   1
   6  -4  25 3995.13 198.024   3
   4   2 -25 3999.54 213.145   3
   2  -6 -25 3587.72 244.119   3
   4   2 -22 3301.53 127.633   1
   2  -6 -22 3150.07 218.569   3
   6  -4  22 3177.24 133.187   1
   6  -4  22 3392.93 170.811   3
   4   2 -19 7457.67 243.696   1
  -2   6  19 8083.46 346.276   3
   6  -4  19 7366.41 274.881   3
   2  -6 -19 7256.67 331.532   3
   2  -6 -19 7616.87 248.559   1
  -2   6  16 28516.1 839.976   2
  -2   6  16 26766.0 773.643   1
  -2   6  16 28254.2 875.388   3
   2  -6 -16 27602.1 833.026   2
   6  -4  16 26771.1 794.336   3
   2  -6 -16 27828.7 778.579   1
   2  -6 -13 34626.5 983.382   2
  -2   6  13 32346.0 939.066   1
  -2   6  13 35726.2 1023.87   3
   2  -6 -13 33795.0 943.519   1
  -2   6  13 33588.2 984.511   2
   6  -4  10 36039.7 962.715   2
   2  -6 -10 35866.7 989.622   1
   2  -6 -10 34394.4 1039.65   3
  -2   6  10 34338.3 986.087   1
  -2   6  10 33661.7 1012.36   2
   2  -6  -7 76450.8 1987.67   1
   6  -4   7 72596.7 1944.59   2
   2  -6  -7 73425.9 2019.13   3
  -2   6   7 72916.1 1986.13   1
   2  -6  -4 10661.4 347.010   3
  -2   6   4 10289.2 334.342   1
  -2   6   1 6370.26 221.412   1
   2  -6  -1 5951.77 212.701   3
   2  -6  -1 6161.45 216.835   1
  -2   6  -2 49665.6 1343.64   3
   2  -6   2 49372.0 1360.94   1
   2  -6   5 66968.0 1816.51   1
  -2   6  -8 83063.6 2240.97   1
   2  -6   8 83202.0 2240.65   1
  -2   6 -11 55420.3 1496.17   1
   2  -6  11 54095.9 1497.37   1
   4   2  14 12538.8 413.863   2
  -2   6 -14 12567.7 347.777   3
   4   2  14 12754.4 441.652   3
  -2   6 -14 11893.6 379.872   1
   2  -6  14 12031.3 383.864   1
  -2   6 -17 3248.44 117.630   3
   2  -6  17 2892.53 132.073   1
   4   2  17 3157.64 187.164   3
   4   2  17 3030.49 162.619   2
  -2   6 -17 2594.65 125.438   1
   6  -4 -17 2866.16 184.918   3
   6  -4 -20-43.6315 87.0592   2
   6  -4 -20 43.4982 74.0424   3
   4   2  20 63.3958 39.1666   1
   4   2  20 55.3667 56.5970   2
   4   2  20-24.8161 85.9531   3
   6  -4 -23-23.8570 89.6092   3
   6  -4 -23-20.8374 35.7807   1
   4   2  23-142.102 111.472   3
   4   2  23 11.7776 38.3424   1
   4   2  23-94.6685 83.3469   2
   4   2  26 16.4118 32.9775   1
   4   2  26 36.1779 94.3926   3
   6  -4 -26 12.1483 31.5151   1
  -2   6 -26-16.5165 68.7621   2
   6  -4 -26 83.6647 86.8686   3
   4   2  29 2983.97 221.711   3
   6  -4 -29 2639.29 213.297   2
   6  -4 -29 2811.95 218.577   3
  -2   6 -29 2788.95 183.402   2
   6  -4 -32 2146.27 202.104   2
   4   2  32 2049.15 200.827   3
   6  -4 -32 2337.30 206.913   3
  -2   6 -32 1999.18 172.223   2
   6  -4 -35 1727.30 198.202   2
   6  -4 -35 2053.77 203.047   3
  -2   6 -35 1691.50 164.202   2
   6  -4 -38 627.050 167.978   3
   6  -4 -38 761.929 166.660   2
  -2   6 -38 856.107 144.388   2
  -2   6 -41 106.730 112.211   2
   6  -4 -41 117.746 144.099   3
  -2   6 -44 421.694 138.439   2
   6  -4 -44 135.908 146.496   3
   5   1 -41 895.987 170.790   3
   5   1 -38 397.130 154.021   2
   5   1 -38 689.769 140.154   3
   5   1 -35 1550.46 172.110   3
   5   1 -35 1213.37 181.408   2
   5   1 -32 5520.07 297.441   3
   5   1 -32 5369.38 314.036   2
   5   1 -29 6040.71 305.490   3
  -6   5 -29 6445.22 275.371   2
  -6   5 -26 20453.3 617.939   2
   1  -6 -26 18882.9 696.104   3
   5   1 -26 19770.2 662.394   3
   6  -5  26 18973.6 548.544   1
   6  -5  23 38285.3 1034.34   1
   5   1 -23 35924.4 1023.06   1
  -6   5 -23 38044.8 1076.21   2
   1  -6 -23 37199.0 1170.37   3
  -1   6  23 40590.4 1185.37   3
   6  -5  23 37664.8 1076.42   3
   6  -5  20 21276.8 669.978   3
   1  -6 -20 22842.9 757.655   3
  -6   5 -20 23317.6 672.871   2
  -1   6  20 23462.9 736.177   2
   6  -5  20 23388.1 652.732   1
  -1   6  20 23187.3 762.034   3
  -1   6  20 22058.6 646.473   1
   6  -5  17 29991.1 804.276   1
  -6   5 -17 28514.9 804.465   2
  -1   6  17 29843.5 907.073   3
  -1   6  17 29670.7 868.541   2
  -1   6  17 26659.0 796.793   1
   6  -5  17 26881.2 804.317   3
  -1   6  14 29172.9 884.360   3
   6  -5  14 27703.6 796.367   3
  -1   6  14 26500.8 799.930   1
   1  -6 -14 29657.0 808.612   1
  -1   6  14 29563.2 854.313   2
  -1   6  11 58478.4 1592.65   2
   1  -6 -11 57048.6 1563.71   1
  -1   6  11 60234.8 1626.82   3
   1  -6 -11 57080.9 1616.21   3
  -1   6  11 54643.2 1559.27   1
  -1   6   8 184223. 4907.98   1
   1  -6  -8 181250. 4941.41   3
   1  -6  -8 187747. 4907.55   1
  -1   6   8 184458. 4948.09   3
  -1   6   5 227327. 6007.52   1
   1  -6  -5 225863. 6022.27   3
  -1   6   2 393040. 10366.9   1
  -1   6  -1 429114. 10993.6   3
  -1   6  -1 410125. 11005.7   1
   1  -6   1 411294. 11002.2   1
   1  -6   4 187789. 4987.63   1
   1  -6   7 152982. 4028.29   1
  -1   6  -7 149259. 4028.18   1
   1  -6  10 250291. 6646.25   1
  -1   6 -10 251725. 6642.54   1
   5   1  13 86354.6 2368.64   2
   1  -6  13 87238.7 2355.09   1
  -1   6 -13 86312.1 2347.61   1
   6  -5 -13 89343.2 2397.19   2
   6  -5 -16 27312.8 838.928   2
   5   1  16 28499.6 843.157   3
   5   1  16 26911.1 807.241   2
   6  -5 -16 26973.8 768.672   1
  -1   6 -16 26742.7 771.979   1
   1  -6  16 26816.3 783.384   1
  -1   6 -16 27311.8 754.933   3
   6  -5 -19 45164.6 1239.28   1
  -1   6 -19 44695.2 1239.71   3
   5   1  19 46131.6 1330.38   3
  -1   6 -19 44470.3 1242.76   1
   5   1  19 46544.0 1301.18   2
   6  -5 -19 45393.4 1352.95   3
   6  -5 -19 45852.4 1332.89   2
   6  -5 -22 16575.7 485.546   1
  -1   6 -22 16855.4 506.448   3
   6  -5 -22 17405.9 596.296   2
   5   1  22 17324.4 590.622   3
   6  -5 -22 16862.9 611.388   3
   5   1  22 15871.2 502.515   1
   5   1  22 17394.1 565.809   2
   5   1  25 11528.0 437.939   3
   6  -5 -25 11397.1 456.900   3
   6  -5 -25 10688.1 315.005   1
  -1   6 -25 11042.6 356.379   3
   6  -5 -28 9675.03 401.999   3
  -1   6 -28 8483.09 286.377   3
   5   1  28 9707.35 386.075   3
   6  -5 -31 2729.01 229.454   3
   6  -5 -31 2285.67 220.916   2
   5   1  31 2533.65 215.300   3
  -1   6 -31 2268.90 188.884   2
   6  -5 -34 1431.98 187.799   3
  -1   6 -34 1389.09 157.481   2
   5   1  34 1460.68 178.938   3
   6  -5 -34 1410.35 180.041   2
  -1   6 -37 744.627 151.756   2
   6  -5 -37 786.866 184.847   3
   6  -5 -37 691.579 163.585   2
   6  -5 -40 733.286 191.657   3
  -1   6 -40 743.331 152.557   2
   6  -5 -43 175.139 153.513   3
  -1   6 -43 451.386 134.347   2
   6   0 -42 390.925 146.720   3
   6   0 -39 519.956 148.287   2
   6   0 -39 486.892 143.562   3
   6   0 -36 472.850 139.213   3
   6   0 -36 311.190 139.038   2
  -6   6 -33 1596.68 141.107   2
   6   0 -33 1361.82 178.342   3
   6   0 -33 1521.62 185.955   2
  -6   6 -30 2860.93 172.225   2
   6   0 -30 2618.80 212.524   3
  -6   6 -27 8127.93 299.125   2
   6   0 -27 7492.10 345.266   3
   0   6  27 8538.97 393.708   3
   6  -6  27 7062.10 240.625   1
  -6   6 -24 25972.0 756.645   2
   6   0 -24 24335.3 818.103   3
   0   6  24 26400.8 856.533   3
   0   6  24 24526.3 708.444   1
   6  -6  24 25440.1 714.805   1
   0   6  21 21790.1 664.187   1
  -6   6 -21 23355.2 688.145   2
   6  -6  21 23236.4 679.067   3
   0   6  21 23819.7 757.861   2
   6  -6  21 24326.2 673.658   1
   0   6  21 24182.0 790.377   3
   0   6  18 11785.9 449.693   3
   0   6  18 10518.6 355.084   1
  -6   6 -18 11445.3 357.272   2
   6  -6  18 11875.2 359.872   1
   0   6  18 11630.4 419.744   2
   6  -6  18 10944.0 349.885   3
  -6   6 -15 31951.1 846.947   2
   0   6  15 28408.4 864.911   1
   0   6  15 31482.6 950.888   3
   0   6  15 30771.0 916.386   2
   6  -6  15 28826.2 842.160   3
   6  -6  15 32261.0 866.928   1
   6  -6  12 12781.4 386.303   1
   0   6  12 12295.9 419.961   2
   0   6  12 11660.4 390.226   1
   0   6  12 11956.0 440.654   3
  -6   6 -12 12243.5 350.001   2
   0   6   9 27516.3 820.217   2
   0   6   9 27814.3 844.247   3
   0   6   9 28242.9 810.229   1
   0  -6  -9 27832.8 806.297   1
   0   6   6 124095. 3332.18   1
   0   6   3 142183. 3806.89   1
   0  -6   0 288787. 7478.11   1
   0   6   0 277647. 7478.18   1
   6  -6   0 281843. 7429.90   2
   6  -6  -3 257733. 6752.53   2
   0  -6   3 253047. 6781.05   1
   0  -6   6 90955.0 2454.35   1
   6  -6  -6 90301.1 2443.66   2
   0  -6   9 77532.5 2100.48   1
   6  -6  -9 77908.3 2106.64   2
   0   6  -9 75905.5 2092.43   1
   6  -6 -12 33538.1 1031.61   3
   6  -6 -12 34573.1 1003.49   2
   6  -6 -12 34449.6 963.974   1
   0   6 -12 34287.5 971.142   1
   6  -6 -15 6837.40 284.324   2
   6   0  15 6360.46 252.234   2
   0   6 -15 6637.15 239.595   1
   6  -6 -15 6783.78 233.628   1
   6   0  18 5638.77 259.811   3
   6  -6 -18 5350.67 198.623   1
   0   6 -18 5458.48 206.015   3
   6  -6 -18 5212.88 259.540   2
   6   0  18 5982.61 240.410   2
   0   6 -18 5399.33 205.658   1
   6  -6 -21 13524.4 531.573   3
   0   6 -21 13491.8 426.068   1
   6   0  21 14911.2 483.692   2
   0   6 -21 14104.6 440.733   3
   6   0  21 15284.6 514.346   3
   6  -6 -21 14323.0 516.669   2
   6  -6 -21 13661.0 423.350   1
   6  -6 -24 11215.5 342.922   1
   6  -6 -24 11125.4 465.423   3
   0   6 -24 11074.1 344.297   1
   6   0  24 12417.0 449.129   3
   0   6 -24 10487.4 368.999   3
   6  -6 -24 11123.3 451.646   2
   6   0  24 11693.3 423.195   2
   6  -6 -27 8746.20 253.233   1
   6  -6 -27 9241.61 408.120   3
   0   6 -27 8183.12 306.036   3
   6   0  27 9083.58 378.601   3
   6   0  30 6396.65 323.964   3
   6  -6 -30 6122.01 339.160   3
   0   6 -30 5745.85 251.144   3
   0   6 -33 1103.63 143.991   2
   6   0  33 1193.52 164.913   3
   6  -6 -33 1220.27 164.082   2
   0   6 -33 1285.90 117.045   3
   6  -6 -33 1672.25 194.160   3
   6  -6 -36 566.719 156.577   3
   6  -6 -36 551.481 158.850   2
   0   6 -36 563.680 136.148   2
   6  -6 -39 572.631 191.259   3
   6  -6 -39 737.174 171.374   2
   0   6 -39 636.903 152.251   2
   6  -6 -42 53.9535 156.176   3
   0   6 -42 180.022 123.316   2
   1   6 -41 41.0404 103.498   2
   6  -7 -41-18.3963 145.409   3
   6  -7 -38 99.2588 119.752   2
   1   6 -38 32.3299 110.152   2
   6  -7 -38-107.840 147.461   3
   1   6 -35 109.394 97.9890   2
   7  -1  35 367.982 118.385   3
   6  -7 -35-25.4434 117.536   3
   1   6 -35 110.741 74.7661   3
   6  -7 -35 225.869 115.816   2
   6  -7 -32 1265.96 177.275   3
   7  -1  32 1461.78 159.749   3
   1   6 -32 1496.16 124.324   3
   6  -7 -29 1251.23 171.830   3
   7  -1  29 1347.27 150.566   3
   7  -1  29 883.910 64.7991   1
   1   6 -29 1119.31 110.420   3
   1   6 -26 31.2377 53.0673   3
   1   6 -26 11.9618 40.8247   1
   6  -7 -26-23.4663 42.1857   1
   6  -7 -26-55.5878 101.367   3
   7  -1  26-32.0978 76.5503   3
   6  -7 -23 2714.32 194.248   2
   6  -7 -23 2599.41 204.613   3
   7  -1  23 3006.21 186.070   3
   1   6 -23 2903.85 131.785   1
   7  -1  23 3264.42 177.553   2
   6  -7 -23 2570.27 123.962   1
   1   6 -23 2872.90 150.337   3
   1   6 -20 5908.47 233.000   3
   7  -1  20 6326.33 254.947   2
   7  -1  20 5960.60 276.773   3
   6  -7 -20 6229.78 290.679   2
   1   6 -20 6088.41 225.018   1
   6  -7 -20 5985.92 220.897   1
   1   6 -17 8124.82 281.332   1
   6  -7 -17 7933.94 274.930   1
   7  -1  17 8046.98 295.327   2
   6  -7 -17 8502.44 335.649   2
   6  -7 -14 1676.19 95.6337   1
   6  -7 -14 1408.58 133.164   3
   6  -7 -14 1625.88 120.955   2
   1   6 -14 1509.33 95.7413   1
   7  -1  14 1539.17 97.6836   2
   6  -7 -11 26.3933 58.8518   3
   1   6 -11 9.98073 39.1967   1
   6  -7 -11 90.4280 37.7636   1
   6  -7 -11-6.46483 51.9223   2
   1   6  -8 159.842 43.3504   1
   6  -7  -8 129.323 41.9544   2
   6  -7  -8 208.771 42.8681   1
   6  -7  -8 182.250 53.8917   3
   6  -7  -5 1944.72 99.8147   2
   6  -7  -2 2598.47 108.224   2
   6  -7   1 4062.64 165.115   1
   1   6   1 3902.46 176.682   1
   6  -7   4 23126.0 656.962   1
   1   6   4 21327.7 672.840   1
   6  -7   7 477.406 52.8487   1
   1   6   7 460.631 62.5103   1
   6  -7  10 137.963 39.0400   1
   1   6  10 190.672 49.1427   1
   1   6  13 4902.12 203.024   1
  -6   7 -13 5006.43 159.107   2
   1   6  13 4696.00 220.178   2
   1   6  13 5100.14 246.555   3
   6  -7  13 4502.56 149.633   3
   6  -7  13 4978.79 192.618   1
   6  -7  16 1856.04 78.2846   3
   1   6  16 1809.30 133.827   2
   1   6  16 2083.51 114.985   1
   6  -7  16 2039.82 108.224   1
   1   6  16 1925.43 154.965   3
  -6   7 -16 1842.60 91.0762   2
  -6   7 -19 666.627 62.9966   2
   1   6  19 609.269 95.5936   2
   6  -7  19 634.584 66.2432   1
   1   6  19 513.110 105.595   3
   1   6  19 635.619 64.8118   1
   1   6  22 386.617 110.024   3
  -6   7 -22 561.393 68.2334   2
   6  -7  22 644.960 62.8985   1
   1   6  22 435.688 57.9251   1
   1   6  22 515.176 100.197   2
   6  -7  25 316.434 53.0700   1
   1   6  25 374.914 119.848   3
  -6   7 -25 270.674 65.7577   2
   7  -1 -25 346.181 101.709   3
   1   6  25 205.606 102.074   2
   1   6  25 314.457 49.0244   1
   1   6  28-22.5780 101.586   3
  -6   7 -28 3.56478 57.0795   2
   7  -1 -28-25.1767 101.724   3
   6  -7  28-36.8039 44.0016   1
   7  -1 -31 26.6521 116.989   3
   7  -1 -31 129.213 103.998   2
  -6   7 -31 196.745 72.7425   2
   1   6  31 210.488 109.342   3
   7  -1 -34 75.7513 104.988   2
   7  -1 -34 188.863 118.220   3
  -6   7 -34 147.294 73.5469   2
   7  -1 -37-48.3698 117.167   2
   7  -1 -37-50.3524 128.528   3
   7  -1 -40-22.2902 127.627   3
   7  -1 -43-30.5533 141.219   3
   2   5 -42-28.8407 111.003   2
   5  -7 -39 199.308 129.613   2
   2   5 -39 274.272 126.208   2
   2   5 -39 29.6074 104.601   3
   5  -7 -39 53.3477 131.697   3
   2   5 -36-60.4599 99.9265   3
   2   5 -36-45.2112 97.7389   2
   5  -7 -36-69.3272 130.205   3
   5  -7 -36-70.1136 127.073   2
   5  -7 -33 831.803 164.623   3
   5  -7 -33 776.963 147.672   2
   7  -2  33 882.657 143.559   3
   2   5 -33 885.716 112.113   3
   5  -7 -30 1214.91 182.924   3
   2   5 -30 872.096 117.192   3
   7  -2  30 1190.21 145.414   3
   2   5 -27 689.857 99.0944   3
   7  -2  27 754.214 114.076   3
   5  -7 -27 415.960 120.916   3
   5  -7 -24 6748.52 334.643   2
   5  -7 -24 7580.53 363.024   3
   7  -2  24 7630.77 319.560   3
   2   5 -24 7347.98 247.751   1
   2   5 -24 7386.17 290.654   3
   5  -7 -24 7237.58 243.563   1
   5  -7 -21 15231.5 466.174   1
   2   5 -21 15243.3 468.823   1
   7  -2  21 15296.4 529.689   3
   5  -7 -21 15361.3 553.402   2
   7  -2  21 16841.3 517.097   2
   5  -7 -21 15098.0 574.528   3
   5  -7 -18 20786.4 684.547   2
   7  -2  18 20308.2 662.031   3
   7  -2  18 20546.9 639.139   2
   2   5 -18 22034.1 617.221   1
   5  -7 -18 20685.9 612.680   1
   7  -2  15 55178.7 1528.20   2
   5  -7 -15 54260.5 1516.43   1
   5  -7 -15 55401.6 1575.28   2
   2   5 -15 56824.1 1522.20   1
   2   5 -12 44402.8 1213.65   1
   5  -7 -12 43184.0 1276.13   3
   7  -2  12 42808.5 1204.69   2
   5  -7 -12 43542.9 1208.16   1
   5  -7 -12 43907.1 1245.99   2
   5  -7  -9 15566.6 491.518   2
   2   5  -9 16176.1 483.784   1
   5  -7  -9 15612.6 473.915   1
   5  -7  -9 14991.7 517.247   3
   5  -7  -6 11360.5 366.957   2
  -5   7   6 11445.8 366.249   2
   5  -7  -6 11981.3 398.099   3
   5  -7  -6 11555.2 365.934   1
  -5   7   3 16238.4 491.187   2
   5  -7  -3 17448.0 495.586   2
   5  -7  -3 17082.3 524.151   3
   2   5   0 24626.0 737.271   1
  -5   7   0 24670.1 691.769   2
   5  -7   0 25402.4 722.234   3
   5  -7   0 25582.4 723.008   1
   5  -7   3 37973.3 1048.17   3
   2   5   3 38240.6 1085.65   1
   5  -7   3 38201.3 1065.57   1
   5  -7   6 94304.4 2520.10   1
   2   5   6 92595.9 2539.84   1
   2   5   9 39825.1 1123.95   3
   5  -7   9 37989.3 1066.41   1
   2   5   9 37153.0 1088.10   1
   2   5  12 5709.81 232.136   1
   2   5  12 5885.09 266.981   3
   5  -7  12 5985.34 218.180   1
   2   5  12 5914.86 243.398   2
   2   5  15 4886.58 224.104   2
   2   5  15 4596.64 197.042   1
   5  -7  15 4775.42 187.785   1
   2   5  15 4683.06 241.037   3
   2   5  18 709.246 107.107   3
   5  -7  18 922.915 71.2886   1
   2   5  18 902.128 97.2940   2
   2   5  18 828.816 71.1885   1
  -5   7 -18 834.722 68.5138   2
  -5   7 -21 2135.10 125.244   2
   2   5  21 2466.79 189.181   3
   2   5  21 2355.31 117.891   1
   5  -7  21 2661.88 120.802   1
   2   5  21 2603.66 167.905   2
   5  -7  24 217.541 47.9398   1
   7  -2 -24 185.576 85.4877   3
   2   5  24 205.866 79.9461   2
   2   5  24 194.670 43.3879   1
  -5   7 -24 180.273 58.1112   2
   2   5  24 266.662 101.284   3
  -5   7 -27 731.773 88.8789   2
   7  -2 -27 630.195 119.377   3
   2   5  27 610.965 130.197   3
   2   5  27 664.337 49.5771   1
   5  -7  27 529.381 59.8695   1
   7  -2 -30 711.440 142.605   2
   2   5  30 593.269 139.841   3
   7  -2 -30 795.983 147.023   3
  -5   7 -30 909.697 107.675   2
  -5   7 -33 211.513 83.4969   2
   2   5  33 204.696 128.663   3
   7  -2 -33 36.8555 105.140   2
   7  -2 -33 163.508 109.891   3
  -5   7 -36-9.83224 83.7767   2
   7  -2 -36-132.266 134.904   3
   7  -2 -36-150.865 136.778   2
   7  -2 -39 45.8034 107.505   3
  -5   7 -39-37.1597 86.3235   2
   7  -2 -39-76.0285 133.113   2
   7  -2 -42-62.9870 128.428   3
   7  -2 -45-48.5020 153.627   3
   3   4 -40 97.4354 102.266   3
   3   4 -40 175.366 120.305   2
   3   4 -37 185.123 115.560   2
   3   4 -37 137.768 93.1630   3
   4  -7 -37 163.592 127.552   3
   4  -7 -37 86.8599 128.457   2
   3   4 -34 6.56078 102.384   2
   3   4 -34 148.855 89.2110   3
   4  -7 -34 171.396 135.927   3
   4  -7 -34-58.8358 117.024   2
   3   4 -31 307.484 111.005   3
   4  -7 -31 278.564 144.835   2
   4  -7 -31 538.302 162.665   3
   7  -3  31 198.286 116.154   3
   7  -3  28 1197.85 138.265   3
   4  -7 -28 1164.26 167.838   3
   7  -3  28 980.747 63.2717   1
   3   4 -28 1019.13 62.7433   1
   4  -7 -25 9269.48 420.332   3
   7  -3  25 9153.59 364.018   3
   3   4 -25 9213.17 290.160   1
   7  -3  25 9000.85 291.310   1
   3   4 -25 9581.36 362.666   3
   4  -7 -22 16184.0 479.851   1
   3   4 -22 16361.0 478.076   1
   7  -3  22 16235.4 539.433   3
   4  -7 -22 14610.8 581.371   3
   4  -7 -22 15779.5 569.589   2
   3   4 -19 11988.4 375.431   1
   4  -7 -19 11775.0 376.132   1
   4  -7 -19 12092.0 448.161   2
   7  -3  19 12630.2 425.340   3
   4  -7 -16 49271.6 1423.79   2
   3   4 -16 49649.3 1362.81   1
   4  -7 -16 49642.6 1365.85   1
   7  -3  16 49691.7 1375.64   2
   4  -7 -13 105477. 2821.65   1
   7  -3  13 105425. 2815.23   2
   4  -7 -13 106000. 2866.05   2
   3   4 -13 105332. 2822.31   1
   4  -7 -13 102505. 2891.46   3
   4  -7 -10 27877.9 855.563   3
   4  -7 -10 27880.6 805.284   1
   3   4 -10 28514.9 809.352   1
   4  -7 -10 28750.3 830.211   2
   4  -7  -7 56034.5 1489.02   2
   4  -7  -7 53658.2 1477.39   1
   4  -7  -7 52989.4 1512.82   3
  -4   7   7 52823.5 1478.04   1
  -4   7   4 80974.2 2196.36   1
  -4   7   4 80566.6 2184.98   2
   4  -7  -4 82333.7 2214.88   3
  -4   7   1 20848.9 596.769   2
   4  -7  -1 21166.4 617.601   1
   4  -7  -1 20939.1 618.379   3
  -4   7   1 21611.8 622.704   1
   4  -7   2 4382.16 161.571   3
  -4   7  -2 4546.27 178.270   1
   4  -7   2 4689.34 177.439   1
   4  -7   5 68956.8 1826.05   1
   4  -7   5 66167.5 1784.07   3
   4  -7   8 12769.7 391.142   1
  -4   7  -8 12033.0 387.832   1
   3   4  11 24708.0 738.171   3
   4  -7  11 23768.4 679.424   1
   4  -7  14 41856.7 1158.62   1
   3   4  14 41050.7 1194.25   2
   3   4  14 40924.2 1177.81   1
   3   4  14 42563.0 1230.06   3
   3   4  17 8773.84 320.990   1
   3   4  17 9966.37 359.144   2
   3   4  17 9719.69 382.574   3
   4  -7  17 9485.10 310.692   1
   4  -7  20 3862.37 161.279   1
   3   4  20 4090.46 233.637   3
   3   4  20 3822.23 163.695   1
   3   4  20 3878.40 208.013   2
   3   4  23 2700.54 125.787   1
   4  -7  23 2799.97 130.171   1
   7  -3 -23 3299.25 214.109   3
  -4   7 -23 2678.71 152.675   2
   3   4  23 2845.10 205.283   3
   3   4  23 3096.74 189.463   2
   3   4  26 118.493 76.8605   2
   7  -3 -26 186.385 90.9541   3
   3   4  26 97.4169 32.6738   1
   3   4  26 233.186 96.5295   3
  -4   7 -26 134.060 59.7511   2
   7  -3 -26 189.163 34.5083   1
   7  -3 -29 597.930 128.822   2
   7  -3 -29 785.151 136.775   3
   7  -3 -29 766.993 37.6064   1
   7  -3 -29 715.827 37.0416   1
  -4   7 -29 777.246 102.400   2
   3   4  29 506.639 142.781   3
   7  -3 -32 79.2745 105.999   2
  -4   7 -32 167.239 82.4638   2
   3   4  32 173.212 126.908   3
   7  -3 -32 172.852 108.659   3
   7  -3 -35 37.4053 109.960   3
  -4   7 -35 39.8853 78.3051   2
   7  -3 -35-85.8542 124.965   2
   7  -3 -38-7.81476 116.995   3
   7  -3 -38-33.1324 130.948   2
  -4   7 -38-75.5132 94.1637   2
  -4   7 -41-120.415 111.183   2
   7  -3 -41-121.567 130.613   3
   7  -3 -44 75.3514 127.145   3
  -4   7 -44-176.424 133.366   2
   4   3 -41-54.0332 113.034   2
   4   3 -41 67.5246 93.7061   3
   4   3 -38 479.371 129.121   2
   4   3 -38 516.659 114.496   3
   4   3 -35 231.260 96.1841   3
   3  -7 -35 74.6558 118.284   3
   4   3 -35 69.8864 108.741   2
   3  -7 -32 691.351 144.118   2
   4   3 -32 906.527 127.456   3
   3  -7 -29-29.0934 127.637   3
   3  -7 -29-57.0192 111.759   2
   7  -4  29-32.4074 33.3690   1
   4   3 -29-33.4293 31.0333   1
   7  -4  29 96.4885 83.3300   3
   4   3 -29 99.8551 82.4164   3
   4   3 -26 707.655 104.870   3
   7  -4  26 744.440 103.685   3
   7  -4  26 592.171 59.0177   1
   3  -7 -26 515.900 127.936   3
   4   3 -23 1773.82 96.9857   1
   3  -7 -23 1992.06 184.040   3
   7  -4  23 2119.80 140.150   3
   7  -4  23 1936.01 103.092   1
   7  -4  20 324.930 68.5429   3
   4   3 -20 453.694 52.0510   1
   3  -7 -20 373.329 52.9383   1
   3  -7 -20 325.152 87.0345   2
  -3   7  17 114.267 68.4878   3
   7  -4  17 155.185 48.3185   3
   3  -7 -17 71.0228 40.8137   1
   4   3 -17 231.030 40.9373   1
  -3   7  17 91.7413 55.8975   2
   3  -7 -17 129.253 58.5833   2
   7  -4  14 41.4990 33.8441   2
  -3   7  14 81.3099 43.7537   1
  -3   7  14 161.678 81.3570   3
   3  -7 -14 2.13466 43.8866   1
   3  -7 -14-7.06231 60.9947   2
  -3   7  14 103.792 57.6736   2
   3  -7 -14-13.7457 82.2844   3
   3  -7 -11 2942.08 132.573   1
   7  -4  11 2822.42 111.830   2
  -3   7  11 3035.40 173.450   3
  -3   7  11 2822.74 130.409   1
   3  -7 -11 2722.70 162.522   3
   3  -7  -8 13524.9 412.460   1
  -3   7   8 12863.1 410.367   1
   3  -7  -8 13035.8 445.142   3
   3  -7  -5 9844.00 341.017   3
  -3   7   5 9881.18 325.281   1
  -3   7   2 13204.8 411.375   1
  -3   7   2 13682.2 422.202   3
   3  -7  -2 12578.4 410.580   3
   3  -7   1 24590.2 717.299   3
  -3   7  -1 24823.0 734.367   1
   3  -7   1 25769.1 735.085   1
  -3   7  -1 26551.8 727.459   3
  -3   7  -4 423.661 35.6075   3
   3  -7   4 319.480 43.6240   1
  -3   7  -7 3268.20 145.128   1
   3  -7   7 3419.26 148.268   1
  -3   7 -10 4737.32 191.581   1
   3  -7  10 5431.33 197.852   1
   4   3  13 2639.74 145.872   2
  -3   7 -13 2651.25 126.081   1
   3  -7  13 2678.07 126.914   1
   4   3  13 2610.41 161.284   3
   4   3  16 15686.6 538.347   3
   3  -7  16 15271.0 468.658   1
   4   3  16 15485.5 506.797   2
   4   3  16 14886.7 485.446   1
   4   3  19 11166.2 431.858   3
   4   3  19 11496.5 405.764   2
   4   3  19 10426.0 362.918   1
   3  -7  19 11016.9 353.966   1
   4   3  22 7335.56 259.817   1
   7  -4 -22 7334.61 348.870   3
   4   3  22 7581.76 317.587   2
   3  -7  22 7315.10 258.840   1
   7  -4 -22 7267.00 336.699   2
   4   3  22 7275.15 338.514   3
   4   3  25 3448.08 220.636   3
   7  -4 -25 3145.28 125.203   1
   4   3  25 3326.77 204.841   2
  -3   7 -25 3036.16 170.980   2
   4   3  25 3186.73 131.439   1
   7  -4 -25 2950.55 216.907   3
   4   3  28 31.6262 26.2300   1
   7  -4 -28-6.91505 97.7747   3
   4   3  28-34.1992 113.902   3
  -3   7 -28 82.7163 64.7445   2
   7  -4 -28-37.8844 36.7401   1
   7  -4 -31 4906.08 291.456   3
   4   3  31 5172.21 304.346   3
  -3   7 -31 4811.57 242.673   2
   7  -4 -31 4133.74 277.879   2
   4   3  34 1658.53 191.802   3
   7  -4 -34 2035.67 193.556   3
  -3   7 -34 1878.00 155.967   2
   7  -4 -34 1903.86 199.063   2
  -3   7 -37 604.741 113.494   2
   7  -4 -37 614.014 155.353   3
   7  -4 -37 577.954 153.765   2
   7  -4 -40 74.7799 137.589   3
  -3   7 -40 129.599 96.7063   2
   7  -4 -43 51.7165 140.592   3
  -3   7 -43-111.250 129.437   2
   5   2 -42 225.239 117.714   3
   5   2 -39 226.411 116.619   3
   5   2 -39 77.1860 120.501   2
   5   2 -36 132.004 118.508   2
   5   2 -36 586.531 123.664   3
   5   2 -33 558.538 121.147   3
   2  -7 -30 1578.22 191.791   3
   7  -5  30 1291.33 58.8429   1
   7  -5  27 4310.81 162.579   1
   5   2 -27 4791.02 250.376   3
   7  -5  27 4442.37 219.416   3
   2  -7 -27 4214.20 273.113   3
   7  -5  24 3520.21 177.961   3
   7  -5  24 3414.08 142.888   1
   5   2 -24 3078.85 131.392   1
   2  -7 -24 3087.64 227.399   3
   5   2 -21 9292.55 298.809   1
  -2   7  21 10222.3 417.364   3
   7  -5  21 9009.08 328.985   3
   7  -5  21 9503.16 309.606   1
   2  -7 -21 8929.56 402.209   3
  -2   7  18 6959.17 322.885   3
   7  -5  18 6630.36 250.728   3
   2  -7 -18 6863.46 243.366   1
  -2   7  18 7313.98 298.419   2
  -2   7  18 6579.45 236.868   1
  -2   7  15 10578.1 407.518   3
  -2   7  15 10464.9 375.948   2
   2  -7 -15 9915.32 330.144   1
  -2   7  15 9476.34 323.508   1
  -2   7  12 8984.41 344.231   3
  -2   7  12 7918.27 307.357   2
  -2   7  12 7910.52 279.000   1
   2  -7 -12 8272.08 283.755   1
   2  -7 -12 8303.53 333.772   3
  -2   7   9 10050.0 365.900   3
   2  -7  -9 9878.93 323.810   1
   2  -7  -9 9350.09 355.612   3
   7  -5   9 9774.10 277.648   2
  -2   7   9 9180.20 318.966   1
   2  -7  -6 42064.6 1194.26   3
  -2   7   6 41549.1 1170.58   1
   2  -7  -3 56538.6 1567.03   3
  -2   7   3 56961.5 1564.30   1
   2  -7   0 115706. 3123.54   1
  -2   7   0 118563. 3121.43   3
  -2   7   0 114921. 3127.17   1
  -2   7  -3 85076.3 2282.06   3
   2  -7   3 85213.0 2304.70   1
   2  -7   6 26365.6 764.129   1
   2  -7   9 5782.48 215.328   1
  -2   7  -9 5485.27 212.323   1
  -2   7 -12 21553.9 625.289   1
   2  -7  12 20649.8 625.594   1
   5   2  15 5797.73 249.549   2
   2  -7  15 6623.80 236.209   1
  -2   7 -15 6216.38 227.546   1
   5   2  15 6131.08 274.480   3
  -2   7 -18 444.031 39.7451   3
   7  -5 -18 417.733 101.359   3
  -2   7 -18 392.181 54.1660   1
   5   2  18 464.083 79.1594   2
   5   2  18 385.577 85.4532   3
   2  -7  18 460.476 63.7629   1
   7  -5 -18 256.588 87.7477   2
   7  -5 -21 8082.66 266.870   1
   7  -5 -21 7822.59 364.697   3
   5   2  21 8473.59 353.021   3
   5   2  21 7990.09 322.926   2
   5   2  21 7549.36 284.307   1
   7  -5 -21 7926.88 352.743   2
   5   2  24 527.058 114.253   3
   7  -5 -24 492.874 115.619   2
   5   2  24 512.546 58.7505   1
   5   2  24 427.479 95.1734   2
   7  -5 -24 563.132 52.7604   1
   7  -5 -24 424.165 110.748   3
   5   2  27 508.756 50.8526   1
   7  -5 -27 252.363 43.6609   1
   7  -5 -27 460.511 125.033   3
   5   2  27 349.831 106.732   3
   7  -5 -30 2859.91 236.233   3
  -2   7 -30 2753.94 188.986   2
   5   2  33 1823.69 188.518   3
   7  -5 -33 1873.91 191.174   2
  -2   7 -33 1651.70 154.690   2
   7  -5 -33 1592.19 188.144   3
  -2   7 -36 601.642 127.904   2
   7  -5 -36 559.602 161.474   3
   7  -5 -36 449.704 146.197   2
   5   2  36 522.961 152.238   3
   7  -5 -39 8.49303 154.112   3
   7  -5 -39 235.590 141.423   2
  -2   7 -39 275.959 118.225   2
   7  -5 -42-106.075 155.526   3
  -2   7 -42 68.9849 104.738   2
  -2   7 -45 196.767 117.891   2
   6   1 -43 136.155 129.711   3
   6   1 -40 416.796 144.333   2
   6   1 -40 538.497 143.311   3
   6   1 -37 131.645 128.699   2
   6   1 -37 276.991 117.367   3
   6   1 -34 459.077 130.964   3
   6   1 -34 564.439 147.598   2
   6   1 -31 805.790 148.679   3
   7  -6  28 6924.74 232.229   1
   6   1 -28 7482.14 342.491   3
  -1   7  25 18193.8 657.052   3
   7  -6  25 16754.6 543.683   3
   1  -7 -25 17118.1 637.897   3
   7  -6  25 17771.3 511.887   1
   6   1 -25 16804.5 498.661   1
   7  -6  22 11814.3 366.680   1
   7  -6  22 11497.9 379.340   3
   1  -7 -22 10976.3 462.412   3
  -1   7  22 12164.1 482.396   3
  -1   7  22 10904.8 357.676   1
  -1   7  22 11875.6 448.866   2
  -1   7  19 9958.55 406.870   3
   7  -6  19 9677.94 312.614   1
   7  -6  19 8545.24 306.048   3
  -1   7  19 9655.11 371.530   2
  -1   7  19 9181.63 306.490   1
   7  -6  16 248.089 50.1222   1
  -1   7  16 114.573 62.8668   2
  -1   7  16 165.606 43.5522   1
  -1   7  16 221.544 77.3133   3
  -1   7  13 1222.06 88.0497   1
  -1   7  13 1543.02 139.734   3
  -1   7  13 1295.98 110.936   2
   1  -7 -13 1422.32 130.982   3
   1  -7 -13 1338.15 93.4725   1
  -1   7  10 7737.62 305.843   3
  -1   7  10 6899.09 276.327   2
  -1   7  10 7184.21 263.643   1
   1  -7 -10 7179.15 296.676   3
   1  -7 -10 7421.86 264.900   1
   1  -7  -7 47696.4 1316.72   1
  -1   7   7 46526.1 1317.46   1
  -1   7   4 192130. 5119.46   1
  -1   7   1 292801. 7542.54   3
  -1   7   1 281885. 7545.45   1
   1  -7  -1 279784. 7538.04   1
   1  -7   2 267320. 7214.24   1
  -1   7  -2 276601. 7200.82   3
   1  -7   5 53906.8 1493.19   1
  -1   7  -8 6151.55 251.907   1
   1  -7   8 8330.54 270.238   1
  -1   7 -11 3093.69 145.281   1
   1  -7  11 3103.32 149.876   1
   7  -6 -11 3038.26 162.197   2
   6   1  14 465.913 69.9961   2
   1  -7  14 534.107 64.5666   1
  -1   7 -14 518.041 58.9855   1
   7  -6 -14 488.746 76.8819   2
   7  -6 -17 3790.52 157.427   1
  -1   7 -17 3758.61 137.649   3
   6   1  17 3857.06 209.749   3
   6   1  17 3704.99 187.659   2
  -1   7 -17 3571.32 158.925   1
   7  -6 -17 3609.42 204.361   2
  -1   7 -20 11593.4 358.736   3
   7  -6 -20 12074.7 374.014   1
   7  -6 -20 11450.0 471.940   3
   6   1  20 12726.7 460.730   3
   6   1  20 11850.6 423.224   2
   7  -6 -20 11765.9 452.230   2
  -1   7 -20 11573.3 376.240   1
   7  -6 -23 22900.4 791.494   3
   7  -6 -23 23668.1 772.295   2
  -1   7 -23 22679.0 664.832   1
   7  -6 -23 23229.3 661.158   1
  -1   7 -23 22322.1 663.226   3
   6   1  23 23789.8 738.284   2
   6   1  23 23695.7 768.757   3
   6   1  26 10130.5 393.784   2
   6   1  26 8629.55 304.826   1
   7  -6 -26 9651.19 296.825   1
   7  -6 -26 9457.51 430.659   3
   6   1  26 10099.6 412.782   3
  -1   7 -26 9655.27 317.200   3
   7  -6 -29 5059.14 155.060   1
   7  -6 -29 4702.69 297.050   3
   6   1  29 5367.34 295.808   3
  -1   7 -32 1867.52 172.760   2
   7  -6 -32 2178.42 214.892   3
   6   1  32 2209.73 206.588   3
   6   1  35 151.936 126.736   3
   7  -6 -35 374.970 125.699   2
   7  -6 -35 452.707 143.504   3
  -1   7 -35 235.399 109.823   2
   7  -6 -38 553.280 154.681   2
   7  -6 -38 484.845 169.990   3
  -1   7 -38 337.961 127.367   2
  -1   7 -41 359.478 123.779   2
   7  -6 -41 189.932 155.545   3
  -1   7 -44 86.2191 115.489   2
   7   0 -41 51.1496 131.548   3
   7   0 -38-57.1946 112.278   2
   7   0 -38-226.589 138.753   3
   7   0 -35 362.271 128.587   2
   7   0 -35 116.687 115.117   3
   7   0 -32 834.375 151.281   3
  -7   7 -29 1620.64 121.100   2
   7  -7  29 1374.57 81.1978   1
   7   0 -29 1193.12 152.660   3
   0   7  29 1238.20 178.274   3
   7   0 -26 4423.97 260.971   3
  -7   7 -26 4834.22 212.469   2
   0   7  26 4976.93 304.264   3
   7   0 -26 4819.58 176.410   1
   7  -7  26 4770.14 185.182   1
   0   7  23 339.466 118.661   3
   0   7  23 437.705 60.5928   1
   0   7  23 366.056 102.832   2
  -7   7 -23 585.450 76.1234   2
   7  -7  23 691.004 69.4776   1
   7  -7  20 2311.91 114.333   3
   0   7  20 2280.87 122.197   1
  -7   7 -20 2537.42 122.581   2
   0   7  20 2546.07 177.916   2
   0   7  20 2817.26 202.556   3
   7  -7  20 2652.71 129.031   1
   7  -7  17 1249.05 87.2981   1
   0   7  17 1122.40 84.9102   1
   7  -7  17 1255.31 70.8100   3
  -7   7 -17 1195.06 72.0984   2
   0   7  17 1098.94 117.365   2
   0   7  17 1315.67 135.172   3
   0   7  14 11945.3 406.862   1
   7  -7  14 12854.1 401.828   1
   0   7  14 12093.4 436.171   2
   0   7  14 12957.3 469.214   3
   0   7  11-40.9885 68.5822   2
   0   7  11 20.4903 45.3790   1
   7  -7  11 80.4751 41.6693   1
   0   7  11 99.1806 69.6456   3
   0  -7  -8 16693.0 517.110   1
   0   7   8 16159.7 519.777   1
   0   7   5 33428.7 970.892   1
   7  -7   2 68609.3 1820.48   2
   0   7   2 69028.0 1893.22   3
   0   7   2 67891.5 1891.22   1
   0   7  -1 35791.0 1040.60   1
   7  -7  -1 36337.0 993.108   2
   0  -7   1 36444.7 1039.64   1
   7  -7  -4 14470.7 439.237   2
   0  -7   4 14460.9 465.420   1
   0  -7   7 55.9136 39.2957   1
   7  -7  -7 182.748 40.1308   2
   0   7  -7 94.0749 38.7552   1
   7  -7 -10 157.342 44.1241   1
   0  -7  10 119.547 48.5557   1
   0   7 -10 93.5585 42.6271   1
   7  -7 -10 120.221 48.8106   2
   7  -7 -13 1642.79 141.749   3
   7  -7 -13 1565.28 96.9904   1
   0   7 -13 1542.03 101.237   1
   7  -7 -13 1709.17 122.533   2
   7  -7 -16 889.278 102.555   2
   0   7 -16 878.680 75.3617   1
   7   0  16 885.364 84.8358   2
   7  -7 -16 934.144 73.2278   1
   7  -7 -19 2013.41 159.026   2
   7   0  19 1756.77 127.376   2
   7   0  19 1763.97 151.762   3
   7  -7 -19 2017.06 106.223   1
   0   7 -19 1628.48 102.666   3
   0   7 -19 1992.43 109.981   1
   7  -7 -22 1362.50 87.4059   1
   0   7 -22 1330.05 90.6098   3
   7   0  22 1285.24 116.144   2
   7  -7 -22 1162.77 136.328   2
   0   7 -22 1250.85 86.7437   1
   7  -7 -22 1365.83 159.589   3
   7   0  22 1154.23 135.569   3
   7   0  25 109.812 88.9836   2
   7  -7 -25 56.2700 116.874   3
   7  -7 -25 263.019 97.7273   2
   7  -7 -25 166.859 42.9946   1
   0   7 -25 206.255 46.7830   1
   7   0  25 80.4871 104.613   3
   0   7 -25 187.104 52.8673   3
   7   0  28 12.4090 114.457   3
   7  -7 -28 103.587 39.7865   1
   7   0  28 128.691 43.3612   1
   7  -7 -28-36.9117 114.824   3
   0   7 -28 16.0764 61.7461   3
   7  -7 -31 104.089 130.689   3
   7   0  31 113.347 109.190   3
   7   0  31 172.054 28.3504   1
   7   0  31 208.283 29.2683   1
   0   7 -31 236.912 64.8503   3
   7  -7 -34 536.176 140.883   3
   7   0  34 553.832 138.486   3
   0   7 -34 391.859 114.986   2
   7  -7 -37-70.3949 136.384   3
   7  -7 -37 190.168 130.284   2
   0   7 -37-103.276 117.494   2
   7   0  37 52.6477 121.926   3
   0   7 -40-135.872 119.933   2
   7  -7 -40-64.6373 141.699   3
   0   7 -43-47.1013 113.354   2
   1   7 -42-6.87501 112.811   2
   7  -8 -39 9.41550 131.510   3
   1   7 -39-26.0923 117.720   2
   7  -8 -36-16.4682 125.467   2
   8  -1  36-36.0267 123.091   3
   1   7 -36-100.156 113.529   2
   7  -8 -36 44.7471 132.524   3
   7  -8 -33-127.682 128.343   3
   1   7 -33 3.17510 59.5296   3
   8  -1  33-13.5590 105.432   3
   7  -8 -30 616.569 147.439   3
   7  -8 -30 793.405 56.7892   1
   8  -1  30 572.503 58.8304   1
   1   7 -30 642.135 85.1387   3
   8  -1  30 532.766 120.713   3
   1   7 -27 1211.36 83.9492   1
   8  -1  27 985.918 136.571   3
   7  -8 -27 1030.55 146.800   2
   7  -8 -27 1252.30 80.4466   1
   1   7 -27 1274.47 100.046   3
   7  -8 -27 1085.59 163.215   3
   1   7 -24 699.648 70.7150   1
   1   7 -24 722.690 78.3117   3
   7  -8 -24 594.250 116.508   2
   8  -1  24 653.291 94.2099   2
   7  -8 -24 691.932 68.3228   1
   8  -1  24 773.220 111.879   3
   7  -8 -24 385.046 118.232   3
   8  -1  21 2066.55 160.879   3
   7  -8 -21 2097.34 166.351   2
   8  -1  21 2286.81 146.531   2
   7  -8 -21 2111.33 116.302   1
   1   7 -21 2127.44 118.643   1
   7  -8 -18 464.132 89.2661   2
   1   7 -18 291.268 54.3710   1
   7  -8 -18 344.364 55.5585   1
   8  -1  18 457.956 66.5510   2
   7  -8 -15 27.8024 66.6593   3
   7  -8 -15 50.8039 53.8204   2
   7  -8 -15 126.436 40.3166   1
   1   7 -15 130.775 43.4249   1
   8  -1  15 100.227 40.2466   2
   7  -8 -12 3154.20 194.354   3
   1   7 -12 3165.77 155.414   1
   7  -8 -12 3250.79 171.103   2
   7  -8 -12 3398.92 154.799   1
   7  -8  -9 24110.7 772.472   3
   7  -8  -9 24424.7 721.259   1
   1   7  -9 24639.7 730.547   1
   7  -8  -9 24388.2 733.390   2
   7  -8  -6 30836.7 886.890   2
   7  -8  -6 31188.0 895.404   1
   7  -8  -3 81511.7 2194.85   2
   7  -8   0 29759.9 814.459   2
   1   7   0 28063.4 870.528   1
   7  -8   0 30219.6 857.199   1
   1   7   3 2924.89 155.998   1
   7  -8   3 3041.14 144.018   1
   7  -8   6 9646.26 327.880   1
   1   7   6 9448.49 346.522   1
   7  -8   9 5907.58 225.113   1
   1   7   9 5784.79 242.344   1
   1   7   9 5758.64 264.233   3
   1   7  12 13502.9 471.362   3
   1   7  12 12860.0 436.195   2
   1   7  12 12446.9 421.508   1
  -7   8 -12 11966.1 341.440   2
   7  -8  12 13659.5 409.852   1
   1   7  15 25470.6 790.704   3
  -7   8 -15 24236.5 656.816   2
   1   7  15 25167.1 753.499   2
   1   7  15 25033.4 721.312   1
   7  -8  15 26650.8 710.019   1
   1   7  18 55585.8 1548.39   3
   1   7  18 50825.7 1446.13   1
  -7   8 -18 52992.5 1409.59   2
   7  -8  18 55788.1 1443.96   1
   1   7  18 53769.1 1503.41   2
   7  -8  18 48916.8 1385.23   3
   7  -8  21 38704.4 1041.05   1
  -7   8 -21 36536.9 1025.56   2
   1   7  21 39526.6 1167.48   3
   1   7  21 37523.9 1114.15   2
   1   7  24 10193.0 446.470   3
  -7   8 -24 9756.57 329.626   2
   7  -8  24 9790.09 323.461   1
   1   7  24 9838.49 403.528   2
   7  -8  27 1143.27 88.0187   1
   8  -1 -27 1004.87 149.066   3
   1   7  27 1098.62 147.107   2
   1   7  27 1177.03 175.517   3
  -7   8 -27 934.376 98.6888   2
   1   7  27 990.010 76.7887   1
   7  -8  30 782.900 66.8834   1
  -7   8 -30 762.904 98.2260   2
   1   7  30 588.973 153.455   3
   8  -1 -30 649.768 132.340   3
   8  -1 -33 1577.97 178.035   3
  -7   8 -33 1368.45 127.402   2
   8  -1 -33 1451.63 182.451   2
   8  -1 -36 750.777 147.447   3
   8  -1 -36 656.102 149.149   2
   8  -1 -39-234.828 155.810   3
   8  -1 -42-23.1967 123.413   3
   2   6 -40-69.1433 115.478   2
   6  -8 -40 46.8964 124.339   3
   2   6 -37-171.038 99.5147   3
   6  -8 -37-27.3880 128.055   3
   6  -8 -37-57.2294 125.021   2
   2   6 -37 39.4051 103.506   2
   2   6 -34-111.184 90.9987   3
   6  -8 -34-85.7721 130.275   3
   8  -2  34-159.261 116.982   3
   2   6 -31-64.4253 82.6499   3
   8  -2  31-107.661 104.685   3
   8  -2  31 34.9262 32.4302   1
   8  -2  31 18.3868 33.6579   1
   6  -8 -31 121.524 124.724   3
   6  -8 -28 95.3409 42.1848   1
   2   6 -28 87.6811 71.1334   3
   6  -8 -28 45.2258 109.558   3
   2   6 -28 22.4923 42.6337   1
   8  -2  28 94.2336 89.6010   3
   6  -8 -25 292.424 97.8517   2
   6  -8 -25 270.524 48.8776   1
   8  -2  25 284.278 81.8155   3
   2   6 -25 367.634 71.5773   3
   2   6 -25 343.317 50.9873   1
   6  -8 -25 99.1871 110.085   3
   6  -8 -22 1294.71 158.993   3
   2   6 -22 1424.29 99.2652   1
   6  -8 -22 1481.74 96.6541   1
   8  -2  22 1458.82 121.515   2
   8  -2  22 1627.02 138.578   3
   6  -8 -22 1453.70 149.381   2
   8  -2  19 15945.0 549.219   3
   8  -2  19 16429.8 521.917   2
   6  -8 -19 16574.0 567.331   2
   2   6 -19 16712.2 499.480   1
   6  -8 -19 15434.8 495.975   1
   8  -2  16 9855.18 339.589   2
   6  -8 -16 10039.5 379.066   2
   2   6 -16 10448.5 336.144   1
   6  -8 -16 9434.39 327.864   1
   2   6 -13 45613.9 1232.84   1
   6  -8 -13 44018.1 1262.87   2
   6  -8 -13 42400.7 1296.00   3
   8  -2  13 43507.1 1221.87   2
   6  -8 -13 43051.2 1224.58   1
   2   6 -10 51848.4 1398.38   1
   6  -8 -10 49060.4 1449.33   3
   6  -8 -10 49647.8 1388.81   1
   6  -8 -10 49305.1 1407.45   2
   2   6  -7 17872.2 551.023   1
   6  -8  -7 18097.2 542.477   1
   6  -8  -7 17248.6 541.299   2
   6  -8  -7 18032.9 579.619   3
   6  -8  -4 17343.7 540.759   3
   6  -8  -4 17059.1 503.407   2
  -6   8   4 16363.8 500.678   2
   6  -8  -1 6698.67 247.893   3
   6  -8  -1 6860.17 245.377   1
  -6   8   1 6312.82 214.210   2
   2   6  -1 6840.74 257.305   1
   2   6   2 765.806 74.5670   1
   6  -8   2 723.687 63.8601   1
  -6   8  -2 637.266 39.9279   2
   6  -8   5 2028.49 111.794   1
   2   6   5 2115.12 127.566   1
   2   6   8 16271.2 536.857   3
   2   6   8 15000.2 508.073   1
   6  -8   8 16114.3 489.502   1
   2   6  11 4561.92 231.962   3
   6  -8  11 4337.62 181.995   1
   2   6  11 4506.40 203.984   1
   2   6  14 19147.0 611.677   2
   6  -8  14 19424.7 574.190   1
  -6   8 -14 18369.4 532.839   2
   2   6  14 19454.1 647.816   3
   2   6  14 19095.6 593.547   1
   2   6  17 18388.7 604.625   2
   2   6  17 18174.3 567.625   1
  -6   8 -17 17317.5 527.944   2
   6  -8  17 19148.8 557.221   1
   2   6  17 18945.0 643.114   3
  -6   8 -20 3069.47 140.704   2
   2   6  20 2810.46 147.068   1
   2   6  20 3007.68 213.297   3
   2   6  20 3242.59 194.117   2
   6  -8  20 3263.61 149.499   1
  -6   8 -23 2183.44 126.014   2
   6  -8  23 2124.24 118.399   1
   2   6  23 2357.17 176.631   2
   2   6  23 2121.49 117.214   1
   2   6  23 2022.42 191.674   3
   2   6  26 35.7085 45.3176   1
   8  -2 -26 182.657 102.478   3
   2   6  26 51.2667 110.052   3
   2   6  26 103.797 98.2572   2
  -6   8 -26 157.694 60.7682   2
   6  -8  26 46.8738 56.3661   1
  -6   8 -29 61.9913 61.9762   2
   2   6  29-23.6973 108.042   3
   6  -8  29 50.4114 42.2544   1
   8  -2 -29 13.7014 109.357   3
   2   6  29 110.418 35.4098   1
  -6   8 -32 57.2931 66.3436   2
   2   6  32 8.53242 118.187   3
   8  -2 -32-93.3730 116.795   3
   8  -2 -32-129.869 124.601   2
  -6   8 -35 26.8550 71.2147   2
   8  -2 -35-142.325 127.257   3
   8  -2 -38-184.094 141.515   3
  -6   8 -38-93.1687 84.5204   2
   8  -2 -41-102.745 128.936   3
   8  -2 -44-32.4717 131.199   3
   3   5 -41 43.8442 110.183   2
   5  -8 -38 335.568 155.042   3
   5  -8 -38 307.568 147.132   2
   3   5 -38 45.5210 100.452   3
   3   5 -38 417.551 131.197   2
   3   5 -35 86.9723 110.126   2
   3   5 -35 127.138 92.9893   3
   8  -3  35-114.770 123.216   3
   5  -8 -35 147.814 118.968   2
   5  -8 -35 188.981 129.991   3
   3   5 -32 13.1478 93.1177   3
   8  -3  32-169.800 127.148   3
   3   5 -29 300.894 99.4556   3
   8  -3  29 294.819 109.099   3
   5  -8 -29 506.293 137.626   3
   8  -3  29 267.251 52.6199   1
   3   5 -26 297.063 85.8852   3
   5  -8 -26 214.331 110.701   3
   5  -8 -26 346.558 53.6604   1
   3   5 -26 366.513 54.4966   1
   8  -3  26 302.804 94.8150   3
   5  -8 -23 1145.37 83.3359   1
   5  -8 -23 1012.09 149.351   3
   8  -3  23 1095.16 123.174   3
   3   5 -23 1088.12 86.6008   1
   5  -8 -20 4379.83 236.905   2
   3   5 -20 4535.25 177.707   1
   5  -8 -20 3954.25 176.289   1
   8  -3  20 4600.09 200.781   2
   8  -3  20 4112.78 216.775   3
   5  -8 -17 51398.0 1435.38   1
   3   5 -17 51884.3 1432.07   1
   5  -8 -17 51821.5 1496.76   2
   8  -3  17 52533.3 1443.93   2
   5  -8 -14 75478.8 2055.96   1
   5  -8 -14 74318.9 2132.11   3
   8  -3  14 76327.6 2049.40   2
   5  -8 -14 76299.8 2101.77   2
   3   5 -14 75008.9 2054.67   1
   5  -8 -11 143322. 3821.41   2
   5  -8 -11 140749. 3858.07   3
   5  -8 -11 143158. 3795.28   1
   3   5 -11 140348. 3795.94   1
   5  -8  -8 72550.6 1952.84   2
  -5   8   8 67838.0 1945.30   2
   3   5  -8 73241.2 1948.95   1
   5  -8  -8 69721.5 1983.18   3
   5  -8  -8 72363.7 1942.92   1
  -5   8   5 25640.9 743.007   2
   5  -8  -5 25999.4 776.040   3
   5  -8  -2 622.350 62.2708   3
  -5   8   2 546.616 56.8153   1
  -5   8   2 648.550 50.4063   2
   3   5   1 9407.95 327.002   1
  -5   8  -1 9463.34 286.702   2
  -5   8  -1 9476.91 320.753   1
   5  -8   1 9757.03 319.709   1
   5  -8   1 9315.90 308.740   3
   3   5   4 13044.4 422.028   1
   5  -8   4 12428.2 379.235   3
   5  -8   4 13072.5 408.486   1
   5  -8   7 60651.2 1584.80   1
   3   5   7 59280.1 1605.28   1
   5  -8   7 55875.7 1529.20   3
   3   5  10 69206.2 1974.97   1
   5  -8  10 72716.5 1952.57   1
   3   5  10 72554.4 2012.51   3
   3   5  13 83242.1 2317.57   2
   3   5  13 88446.9 2361.66   3
   3   5  13 82048.5 2306.53   1
   5  -8  13 84019.9 2282.16   1
   3   5  16 43622.6 1276.44   1
   3   5  16 46019.6 1305.55   2
   5  -8  16 45008.3 1258.78   1
   3   5  16 46125.4 1344.59   3
   3   5  19 1310.07 97.5640   1
   3   5  19 1430.90 124.627   2
   5  -8  19 1311.27 93.4715   1
   3   5  19 1287.51 140.969   3
   3   5  22 99.4430 88.3181   3
   3   5  22 191.011 75.7556   2
   5  -8  22 147.441 51.1238   1
  -5   8 -22 79.3468 50.6144   2
   3   5  22 213.136 49.9587   1
   3   5  25 62.3256 93.5133   3
   8  -3 -25 138.252 87.7171   3
   5  -8  25 138.438 46.0337   1
   3   5  25 133.993 41.5794   1
  -5   8 -25 84.3454 55.7914   2
   3   5  25 5.34873 70.9601   2
   8  -3 -28 2790.52 213.393   3
  -5   8 -28 2684.82 158.559   2
   3   5  28 2570.36 217.416   3
   8  -3 -28 2784.33 114.298   1
   3   5  28 2572.03 113.701   1
   8  -3 -31 80.5636 19.0209   1
   3   5  31 32.0243 109.975   3
   8  -3 -31 67.1035 18.2120   1
  -5   8 -31 24.5371 67.1290   2
   8  -3 -31 87.1824 98.0804   3
   8  -3 -31-14.5915 122.912   2
  -5   8 -34 302.617 83.9911   2
   8  -3 -34 46.8170 113.998   2
   8  -3 -34 266.110 115.208   3
   3   5  34 309.920 131.320   3
   8  -3 -37-23.4786 117.595   3
  -5   8 -37-54.8874 85.7283   2
   8  -3 -37-143.047 144.547   2
  -5   8 -40-42.3799 96.0739   2
   8  -3 -40 72.8965 114.061   3
   8  -3 -43-116.629 135.497   3
   4   4 -39-67.3210 102.090   3
   4   4 -39-44.1632 110.595   2
   4   4 -36 155.192 91.9722   3
   4  -8 -36-26.2553 118.660   3
   4   4 -36-7.13211 112.757   2
   8  -4  33 138.505 92.6169   3
   4  -8 -33 124.056 116.561   3
   4   4 -33 318.497 99.4212   3
   4  -8 -33 110.185 114.711   2
   8  -4  30 83.3822 39.5577   1
   4   4 -30 155.636 99.2262   3
   8  -4  30 123.512 94.9629   3
   4  -8 -30 213.547 127.452   3
   4   4 -30 82.0780 37.2116   1
   8  -4  27 710.677 69.9645   1
   4   4 -27 874.931 70.2204   1
   8  -4  27 804.651 114.554   3
   4   4 -27 825.047 117.207   3
   4  -8 -27 813.656 145.018   3
   8  -4  24 6224.85 274.998   3
   4   4 -24 6475.51 226.616   1
   4  -8 -24 5817.97 325.794   3
   4  -8 -24 6522.34 227.755   1
   4  -8 -21 2315.71 122.112   1
   4   4 -21 2163.57 116.378   1
   8  -4  21 2101.71 147.342   3
   4  -8 -21 2098.07 167.187   2
   4  -8 -18 22689.8 663.006   1
   4  -8 -18 22597.3 723.356   2
   8  -4  18 22414.2 691.751   3
   4   4 -18 22153.2 656.430   1
   4   4 -15 64149.5 1803.33   1
   4  -8 -15 66711.9 1857.66   2
   8  -4  15 67221.9 1800.45   2
   4  -8 -15 67685.5 1811.54   1
   4  -8 -15 64358.9 1889.30   3
  -4   8  12 24470.6 726.787   1
   4  -8 -12 24793.5 728.602   1
  -4   8  12 26659.8 803.824   3
   4  -8 -12 24565.8 787.173   3
   4  -8 -12 25360.2 759.049   2
   8  -4  12 24599.8 702.916   2
   4  -8  -9 53681.3 1492.65   3
   4  -8  -9 52507.8 1444.46   1
  -4   8   9 50935.5 1444.20   1
  -4   8   6 60070.4 1636.82   1
  -4   8   6 58776.7 1632.51   2
   4  -8  -6 60283.6 1662.90   3
   4  -8  -6 58807.6 1632.64   1
   4  -8  -3 10511.5 354.810   3
  -4   8   3 10725.9 352.190   1
  -4   8   3 11344.0 369.088   3
  -4   8   3 9891.27 331.442   2
  -4   8   0 1422.53 91.9306   1
   4  -8   0 1351.51 83.7982   3
  -4   8   0 1490.05 91.1101   3
   4  -8   0 1457.88 90.8789   1
   4  -8   3 2787.02 116.020   3
   4  -8   3 2968.37 136.864   1
   4  -8   6 3844.34 164.948   1
   4  -8   9 39263.4 1082.81   1
  -4   8  -9 37305.3 1080.38   1
  -4   8 -12 48966.4 1394.73   1
   4  -8  12 51628.3 1401.02   1
   4   4  12 50700.7 1459.75   3
   4   4  15 36708.6 1084.52   1
   4   4  15 37858.3 1101.51   2
   4   4  15 37592.3 1141.98   3
   4  -8  15 37937.1 1063.01   1
   4   4  18 26690.9 825.221   3
   4  -8  18 24555.5 732.243   1
   4   4  18 24628.6 753.914   1
   4   4  18 25300.7 784.199   2
   4  -8  21 1380.77 95.3942   1
   4   4  21 1417.07 101.517   1
   4   4  21 1192.28 128.113   2
   4   4  24 487.570 58.2564   1
   4   4  24 306.745 99.5629   3
   4   4  24 272.159 85.0183   2
   8  -4 -24 418.741 110.503   3
   4  -8  24 362.956 59.8601   1
  -4   8 -24 371.450 70.2910   2
   8  -4 -27 153.746 105.908   3
   8  -4 -27 268.291 41.2087   1
   4   4  27 78.2276 99.5071   3
   4   4  27 251.978 43.9627   1
   4   4  27 257.880 92.7288   2
  -4   8 -27 145.818 63.4398   2
   8  -4 -30 308.829 115.213   3
   4   4  30 169.249 127.799   3
  -4   8 -30 303.631 86.6516   2
   8  -4 -30 407.918 39.0680   1
   4   4  30 448.530 39.4010   1
  -4   8 -33 219.734 82.3227   2
   8  -4 -33 247.725 115.673   3
   4   4  33 351.771 128.666   3
   8  -4 -33 275.264 116.704   2
   8  -4 -36-156.042 141.082   2
  -4   8 -36-60.4768 85.3965   2
   8  -4 -36 23.8769 112.095   3
   8  -4 -42-239.336 174.741   3
  -4   8 -42-161.205 119.108   2
   5   3 -40-81.4995 88.4279   3
   5   3 -40-124.448 129.925   2
   5   3 -37-22.6593 113.107   2
   5   3 -37 239.551 101.491   3
   3  -8 -34 185.688 119.117   3
   5   3 -34 386.329 104.296   3
   8  -5  31 247.800 36.5485   1
   5   3 -31 240.229 30.3472   1
   8  -5  31 363.064 89.3225   3
   5   3 -31 325.314 97.8304   3
   3  -8 -31 238.090 124.009   3
   3  -8 -28-59.2683 115.978   3
   5   3 -28 61.1365 74.6048   3
   8  -5  28-41.0151 51.8984   1
   8  -5  28 172.289 73.9342   3
   8  -5  25 1250.33 119.888   3
   8  -5  25 1343.26 91.0076   1
   5   3 -25 1272.66 83.9696   1
   3  -8 -25 1352.29 168.010   3
   8  -5  22 8162.81 310.207   3
   3  -8 -22 8413.98 285.055   1
   5   3 -22 8191.02 275.490   1
   3  -8 -22 8333.38 386.452   3
   8  -5  19 6125.85 250.050   3
  -3   8  19 6772.21 327.443   3
   3  -8 -19 6466.65 236.117   1
   5   3 -19 6079.27 225.922   1
  -3   8  19 6442.74 289.283   2
   3  -8 -16 10192.3 344.596   1
  -3   8  16 10154.0 339.566   1
  -3   8  16 10247.2 384.974   2
  -3   8  16 10975.0 426.815   3
   3  -8 -13 18.7813 62.3519   3
  -3   8  13 74.2930 63.9307   3
   3  -8 -13 85.0876 39.3477   1
   8  -5  13 167.103 30.2577   2
   3  -8 -10 2771.21 166.081   3
   8  -5  10 2796.23 103.169   2
  -3   8  10 2625.22 134.266   1
   3  -8 -10 2808.11 137.172   1
   3  -8  -7 3145.62 145.109   1
  -3   8   7 3011.97 143.947   1
   3  -8  -7 3005.29 162.252   3
   3  -8  -4 14945.0 487.821   3
  -3   8   4 15424.8 482.050   1
  -3   8   4 15569.3 498.790   3
  -3   8   1 7272.03 269.396   1
   3  -8  -1 7677.77 269.650   1
  -3   8   1 7772.00 273.289   3
   3  -8  -1 7230.03 262.246   3
  -3   8  -2 40614.3 1204.14   1
   3  -8   2 43244.4 1205.61   1
  -3   8  -2 44559.1 1191.96   3
   3  -8   5 23759.4 717.320   1
  -3   8  -5 24738.0 684.075   3
   3  -8   8 10258.7 344.361   1
  -3   8  -8 10209.7 343.477   1
   3  -8  11 36808.9 1034.81   1
  -3   8 -11 35893.5 1033.56   1
  -3   8 -14 8360.32 295.578   1
   5   3  14 8807.40 353.502   3
   3  -8  14 8624.88 301.339   1
   5   3  17 2065.49 136.387   2
   3  -8  17 1861.81 113.221   1
  -3   8 -17 1971.99 110.620   1
   5   3  17 2326.89 163.854   3
   5   3  20 7806.46 350.353   3
   5   3  20 7246.68 283.351   1
   3  -8  20 7627.87 274.260   1
   5   3  20 7850.33 315.868   2
   8  -5 -20 7186.24 351.984   3
   8  -5 -23 6.60244 90.6983   3
   8  -5 -23 63.1614 41.7526   1
   5   3  23 135.707 49.8535   1
   5   3  23 135.126 90.6330   3
   8  -5 -23 11.6558 85.6792   2
   5   3  23-28.5896 92.3707   2
   5   3  26 33.3209 96.1115   3
   8  -5 -26 31.1860 34.3723   1
   8  -5 -26-70.7131 108.865   3
   5   3  26-67.5832 91.4705   2
   5   3  26 68.6011 38.2138   1
   5   3  29-58.1125 123.060   3
   8  -5 -29 52.2676 119.928   3
   5   3  29 33.4058 36.3798   1
   8  -5 -29 23.3020 35.5169   1
  -3   8 -29 34.2645 78.0591   2
   8  -5 -32 187.453 127.413   3
   5   3  32-38.8818 127.622   3
  -3   8 -32 127.924 82.9574   2
   5   3  35-100.064 138.459   3
   8  -5 -35 128.737 110.038   2
  -3   8 -35 41.4296 85.7398   2
   8  -5 -35 24.2464 113.354   3
   8  -5 -38-168.672 156.661   3
  -3   8 -38-32.8320 98.2738   2
   8  -5 -38-8.45894 123.879   2
   8  -5 -41-157.411 165.871   3
  -3   8 -44-161.085 133.107   2
   6   2 -41-122.233 123.657   3
   6   2 -38-157.455 139.251   2
   6   2 -38-19.1123 103.931   3
   6   2 -35 161.426 100.050   3
   6   2 -35-22.8660 128.409   2
   6   2 -32 1244.08 153.090   3
   8  -6  32 903.002 45.9121   1
   6   2 -29 949.546 132.358   3
   8  -6  29 1047.31 107.979   3
   2  -8 -29 1076.34 157.422   3
   8  -6  29 1159.16 72.6442   1
   8  -6  26 278.991 56.1410   1
   2  -8 -26 227.531 102.349   3
   8  -6  26 276.040 73.0737   3
   6   2 -26 213.984 48.6371   1
   8  -6  23 282.892 56.1813   1
   8  -6  23 183.315 66.7849   3
   6   2 -23 247.302 51.3376   1
   2  -8 -23 124.759 91.9066   3
  -2   8  23 194.487 117.158   3
   8  -6  20 5148.81 211.978   3
   8  -6  20 5614.23 212.225   1
  -2   8  20 5049.63 201.927   1
  -2   8  20 5372.32 262.778   2
  -2   8  20 5330.30 291.932   3
  -2   8  17 1646.01 100.945   1
   2  -8 -17 1852.81 109.513   1
  -2   8  17 1647.64 152.443   3
   8  -6  17 1539.35 98.9666   3
  -2   8  17 1809.61 137.002   2
   2  -8 -14 9318.71 323.109   1
  -2   8  14 10044.2 393.069   3
   2  -8 -14 9197.46 376.423   3
  -2   8  14 8910.25 315.782   1
  -2   8  14 9488.79 355.445   2
   2  -8 -11 790.701 73.3871   1
  -2   8  11 769.874 72.2876   1
   2  -8 -11 701.421 93.3817   3
  -2   8  11 935.552 103.266   3
   2  -8  -8 30804.7 881.010   1
  -2   8   8 30454.8 882.635   1
   2  -8  -8 29676.3 910.467   3
  -2   8   5 15757.1 493.320   1
   2  -8  -5 15298.1 501.740   3
  -2   8   2 24303.8 742.138   1
  -2   8   2 25776.3 748.008   3
  -2   8  -1 178.208 44.7930   1
   2  -8   1 73.9693 35.9698   1
  -2   8  -1 152.860 39.6826   3
   2  -8   4 649.944 65.3122   1
  -2   8  -4 698.534 54.9877   3
  -2   8  -7 12615.5 422.427   1
   2  -8   7 13472.5 425.856   1
   2  -8  10 24680.5 735.289   1
  -2   8 -10 24876.1 734.585   1
   2  -8  13 2106.05 120.375   1
  -2   8 -13 2063.58 118.174   1
   6   2  16 2754.83 159.927   2
   2  -8  16 2973.60 147.512   1
   8  -6 -16 2950.75 177.205   2
   6   2  16 2913.17 183.559   3
  -2   8 -16 2960.21 142.439   1
   6   2  19 368.382 78.6465   2
   8  -6 -19 385.150 84.9697   2
   8  -6 -19 394.095 108.137   3
  -2   8 -19 501.327 60.2074   1
   2  -8  19 472.918 67.4544   1
   6   2  19 533.856 101.553   3
   6   2  22 464.927 107.515   3
   8  -6 -22 559.527 62.8182   1
   6   2  22 381.865 92.0609   2
   8  -6 -22 349.315 113.996   3
   8  -6 -25 381.832 114.746   3
   6   2  25 415.635 110.419   3
   8  -6 -25 382.588 55.2410   1
   6   2  25 320.961 95.6249   2
   8  -6 -25 492.330 115.577   2
   6   2  25 414.761 61.6825   1
   6   2  28 84.4695 41.2088   1
   6   2  28 6.83954 102.780   3
   8  -6 -28 141.545 39.5195   1
  -2   8 -31 4.87223 83.6998   2
   8  -6 -31 66.2390 24.3135   1
   8  -6 -31-140.938 153.061   3
   6   2  31 44.3313 28.2473   1
   6   2  31 22.0657 114.771   3
  -2   8 -34 20.9065 82.8902   2
   6   2  34-23.5228 115.250   3
   8  -6 -37-33.2684 124.060   2
   8  -6 -37-102.960 143.709   3
  -2   8 -37 56.5751 98.2357   2
   8  -6 -40-160.816 156.805   3
  -2   8 -40-71.2877 105.908   2
  -2   8 -43-175.668 130.007   2
   7   1 -42-182.096 146.744   3
   7   1 -39 49.7981 118.779   2
   7   1 -39 96.7565 110.672   3
   7   1 -36-32.2417 117.144   2
   7   1 -36-13.4868 115.515   3
   7   1 -33-155.329 130.000   3
   8  -7  30 43.2192 40.0570   1
   7   1 -30-209.074 127.823   3
  -1   8  27 424.140 137.702   3
   8  -7  27 706.113 72.1301   1
   7   1 -27 531.167 121.012   3
   7   1 -27 865.565 66.6473   1
   8  -7  24 316.347 62.5683   1
   8  -7  24 345.266 63.8524   3
  -1   8  24 107.963 57.7063   1
  -1   8  24 108.541 122.036   3
  -1   8  24 188.652 104.854   2
   8  -7  21 2589.25 131.909   3
   8  -7  21 2933.51 141.247   1
  -1   8  21 2535.08 133.460   1
  -1   8  21 2792.99 216.370   3
  -1   8  21 2739.37 190.293   2
   8  -7  18 3259.87 152.888   1
  -1   8  18 2876.62 146.741   1
  -1   8  18 3057.55 188.377   2
  -1   8  18 3381.96 220.913   3
   8  -7  18 3091.32 135.745   3
   1  -8 -15 188.574 77.5639   3
   8  -7  15 623.103 68.2891   1
   1  -8 -15 703.618 70.0636   1
  -1   8  15 333.393 68.3123   2
  -1   8  15 367.117 55.6468   1
  -1   8  15 401.002 85.3467   3
  -1   8  12 24734.3 759.437   1
   1  -8 -12 26734.8 763.668   1
  -1   8  12 27336.2 826.634   3
  -1   8  12 24084.5 779.791   2
   1  -8  -9 4049.47 182.161   1
  -1   8   9 4021.23 186.085   1
  -1   8   6 25267.4 766.348   1
   1  -8  -6 25790.7 761.952   1
   8  -7   3 392.832 27.9294   2
  -1   8   3 536.231 68.7935   3
  -1   8   3 499.733 64.7811   1
  -1   8   0 20184.0 630.126   1
  -1   8   0 20755.1 623.399   3
   8  -7   0 20250.0 577.130   2
   1  -8   0 20611.8 624.950   1
   1  -8   3 2901.88 149.357   1
  -1   8  -3 3058.82 139.430   3
   1  -8   6 293.728 50.3669   1
   8  -7  -6 335.040 49.5582   2
  -1   8  -9 1728.41 107.764   1
   1  -8   9 1560.23 104.145   1
   1  -8  12 16475.9 519.971   1
   8  -7 -12 16530.1 538.795   2
  -1   8 -12 15881.9 511.270   1
   7   1  15 11246.1 395.518   2
   8  -7 -15 11734.6 422.646   2
  -1   8 -15 11195.7 379.762   1
   1  -8  15 11461.0 389.379   1
   8  -7 -18 17645.2 521.104   1
   7   1  18 17133.8 590.698   3
   7   1  18 16040.9 549.972   2
   8  -7 -18 18150.3 589.116   2
  -1   8 -18 16729.1 522.856   1
  -1   8 -18 16419.8 480.146   3
  -1   8 -21 2205.73 121.794   1
   7   1  21 2290.53 176.272   3
   8  -7 -21 2139.98 118.349   1
   7   1  21 1922.82 148.620   2
   8  -7 -21 2271.22 176.306   2
   8  -7 -21 2003.97 187.115   3
  -1   8 -21 2061.08 96.8595   3
  -1   8 -24-54.6047 50.7218   3
   8  -7 -24 49.6151 110.958   3
   8  -7 -24 114.711 98.7707   2
   8  -7 -24 17.1785 51.2280   1
   7   1  24-11.9554 102.116   3
  -1   8 -24 97.8464 52.3349   1
   7   1  24-54.7345 91.2067   2
   7   1  27 27.5799 55.0795   1
   7   1  27-70.4716 106.079   3
  -1   8 -27 136.624 44.6910   3
   7   1  27-51.1498 106.933   2
   8  -7 -27 113.009 42.1848   1
   8  -7 -27 39.7990 107.546   2
   8  -7 -27 106.632 110.706   3
   7   1  30 442.619 131.182   3
   8  -7 -30 409.246 48.6534   1
   8  -7 -30 180.518 126.448   3
   7   1  30 366.504 51.9173   1
   7   1  33 119.841 110.171   3
  -1   8 -33 172.580 95.2247   2
   8  -7 -33 184.850 129.858   3
  -1   8 -36-96.6233 112.296   2
   8  -7 -36-131.886 136.488   2
   7   1  36-86.6695 120.495   3
   8  -7 -36-60.9372 128.455   3
   8  -7 -39-136.523 153.343   3
  -1   8 -39-91.2660 111.457   2
  -1   8 -42-152.899 117.015   2
   8   0 -43 30.1602 144.884   3
   8   0 -40-163.499 148.068   3
   8   0 -37-181.298 141.803   3
   8   0 -37-92.8553 124.589   2
   8   0 -34 1439.06 178.078   3
   0   8  31 8.73033 144.129   3
   8  -8  31 98.1280 50.6583   1
   8   0 -31 93.7166 110.195   3
   0   8  28-91.0032 140.550   3
   8   0 -28 51.5970 100.642   3
   8  -8  28 61.8036 54.6238   1
   8   0 -28 63.0706 46.5091   1
   8  -8  25 1787.17 114.555   1
   0   8  25 1736.68 199.635   3
   0   8  25 1867.58 177.997   2
   0   8  25 1424.57 103.649   1
   0   8  22 38871.3 1173.61   3
   8  -8  22 34958.0 1001.92   3
   8  -8  22 38748.8 1037.66   1
   0   8  22 33206.7 1024.05   1
   0   8  22 39134.7 1120.25   2
   8  -8  19 31865.2 931.965   3
   0   8  19 36621.2 1090.32   3
   0   8  19 32247.6 972.637   1
   0   8  19 34810.5 1042.27   2
   8  -8  19 37598.4 982.233   1
   0   8  16 22331.4 719.004   3
   8  -8  16 22397.6 632.253   1
   0   8  16 19774.4 631.181   1
   8  -8  16 19408.7 581.119   3
   0   8  16 21504.8 673.491   2
   8  -8  13 29188.9 820.825   1
   0   8  13 27501.3 850.504   2
   0   8  13 28787.1 887.435   3
   0   8  13 26070.0 825.943   1
   0   8  10 13547.0 464.930   1
   8  -8  10 14290.3 450.280   1
   0  -8  -7 689.326 70.3484   1
   0   8   7 444.426 63.4136   1
   0   8   4 14788.7 488.702   1
   0   8   4 14637.9 497.351   3
   0   8   1 28042.4 855.634   1
   0   8   1 29429.4 855.963   3
   8  -8   1 28658.4 787.602   2
   0  -8  -1 28546.7 852.642   1
   0  -8   2 19514.1 596.074   1
   8  -8  -2 18509.0 548.521   2
   0  -8   5 32288.1 924.684   1
   8  -8  -5 30577.6 892.465   2
   0  -8   8 7140.49 277.741   1
   0   8  -8 7062.82 274.022   1
   8  -8  -8 7003.80 266.793   2
   8  -8 -11 6503.61 247.169   1
   8  -8 -11 6353.05 262.863   2
   0   8 -11 6388.03 252.986   1
   8  -8 -14 10807.4 434.966   3
   8  -8 -14 10800.3 363.811   1
   8  -8 -14 11394.7 404.327   2
   0   8 -14 10200.5 366.066   1
   8   0  17 3380.52 174.776   2
   8  -8 -17 3237.96 194.156   2
   8  -8 -17 3511.48 160.576   1
   0   8 -17 3287.98 160.502   1
   8  -8 -20 11568.7 374.876   1
   0   8 -20 11312.4 381.511   1
   0   8 -20 11032.0 357.088   3
   8   0  20 11453.2 405.026   2
   8  -8 -20 11952.5 454.353   2
   8   0  20 11587.2 448.609   3
   0   8 -23 5254.40 203.224   3
   8   0  23 5714.06 293.052   3
   0   8 -23 5508.22 219.292   1
   8  -8 -23 5190.77 214.207   1
   8  -8 -23 5632.72 296.517   2
   8   0  23 5793.05 260.997   2
   8  -8 -23 5256.55 311.562   3
   8   0  26 296.894 108.921   3
   8   0  26 347.580 95.2579   2
   8  -8 -26 350.524 56.1629   1
   8  -8 -26 159.269 111.846   3
   0   8 -26 417.683 62.5788   1
   8  -8 -26 272.506 115.695   2
   0   8 -26 364.932 60.6530   3
   8  -8 -29 1302.59 81.7536   1
   8   0  29 1164.25 156.648   3
   8  -8 -29 1184.59 158.393   2
   0   8 -29 1381.04 92.5954   3
   8  -8 -29 1037.14 158.938   3
   8   0  29 1024.23 87.8495   1
   8  -8 -32 281.281 128.734   3
   8   0  32 248.502 116.744   3
   8   0  32 291.191 42.1602   1
   0   8 -35 253.087 111.055   2
   8   0  35 247.532 122.159   3
   8  -8 -35 274.709 123.957   3
   8  -8 -38-74.0502 128.227   3
   0   8 -41 90.9179 107.541   2
   1   8 -37-146.443 132.381   2
   8  -9 -37-37.6797 128.298   3
   8  -9 -34-108.068 125.825   3
   1   8 -34-107.079 70.5569   3
   9  -1  34-178.274 137.654   3
   9  -1  31 382.934 123.042   3
   8  -9 -31 492.405 134.720   3
   9  -1  31 496.614 63.6899   1
   8  -9 -31 588.331 139.258   2
   8  -9 -31 641.372 59.0209   1
   1   8 -31 636.026 75.4317   3
   8  -9 -28 16.0475 95.5819   3
   1   8 -28 37.1522 58.9572   3
   8  -9 -28 88.1283 47.3684   1
   9  -1  28-139.160 129.016   3
   8  -9 -28-20.9168 112.340   2
   1   8 -28 98.1734 52.0189   1
   8  -9 -25 202.978 56.4284   1
   1   8 -25 108.160 58.6109   1
   1   8 -25 154.642 56.4969   3
   9  -1  25 88.1173 75.1431   2
   8  -9 -25 120.948 101.664   2
   9  -1  25 141.957 93.8747   3
   8  -9 -25 68.0038 98.3779   3
   1   8 -22 691.523 74.7104   3
   8  -9 -22 528.233 77.5962   1
   8  -9 -22 559.650 121.540   2
   9  -1  22 756.143 94.1192   2
   9  -1  22 576.578 111.708   3
   1   8 -22 392.897 75.8367   1
   1   8 -19 538.647 72.7731   1
   9  -1  19 498.528 77.3356   2
   8  -9 -19 415.943 67.3864   1
   8  -9 -19 459.921 99.4310   2
   8  -9 -16 1384.29 144.510   3
   9  -1  16 1412.07 105.339   2
   8  -9 -16 1439.03 101.754   1
   8  -9 -16 1445.19 127.798   2
   1   8 -16 1478.86 105.304   1
   8  -9 -13 16681.5 621.287   3
   8  -9 -13 17808.0 587.503   2
   8  -9 -13 18496.0 561.372   1
   1   8 -13 18036.8 564.428   1
   1   8 -10 36518.5 1047.31   1
   8  -9 -10 35510.3 1048.01   2
   8  -9 -10 36456.8 1039.98   1
   8  -9 -10 35382.0 1098.51   3
   8  -9  -7 52556.0 1420.81   1
   1   8  -7 49794.5 1428.18   1
   8  -9  -7 49576.3 1408.78   2
   8  -9  -7 49642.8 1459.69   3
   8  -9  -4 72295.9 1965.12   2
   8  -9  -1 56340.5 1516.90   2
   1   8  -1 53852.2 1578.77   1
   8  -9  -1 56780.1 1560.57   1
   8  -9   2 38453.3 1074.56   1
   1   8   2 36057.8 1094.15   1
   1   8   5 32664.5 1013.94   1
   8  -9   5 35582.7 994.012   1
   1   8   8 21312.3 691.298   1
   8  -9   8 22471.7 669.373   1
   1   8  11 13542.1 504.110   3
   1   8  11 13840.5 470.896   1
   8  -9  11 13728.8 447.908   1
   8  -9  14 62135.6 1681.08   1
   1   8  14 60011.5 1718.40   2
   1   8  14 61124.3 1765.95   3
   1   8  14 58533.0 1697.52   1
   1   8  17 58759.1 1601.91   3
   8  -9  17 59980.6 1501.73   1
   1   8  17 55558.3 1511.87   1
   1   8  17 56938.2 1553.57   2
  -8   9 -20 36190.5 1000.60   2
   1   8  20 37635.4 1111.36   2
   1   8  20 38064.0 1158.55   3
   8  -9  20 37311.0 1042.40   1
   8  -9  23 23489.7 668.924   1
  -8   9 -23 22134.2 644.482   2
   1   8  23 23644.2 803.144   3
   1   8  23 21832.6 741.062   2
   1   8  26 7628.69 387.674   3
  -8   9 -26 6694.85 256.827   2
   1   8  26 6104.31 249.459   1
   1   8  26 6947.61 335.656   2
   8  -9  26 7194.80 261.689   1
   8  -9  29 456.332 78.3049   1
   1   8  29 583.565 68.8992   1
   9  -1 -29 749.303 145.989   3
   1   8  29 442.940 157.380   3
   9  -1 -32 1172.26 162.337   3
   9  -1 -35 118.604 126.485   2
   9  -1 -35 315.138 136.188   3
   9  -1 -38-100.609 139.690   3
   9  -1 -41 71.3081 137.219   3
   2   7 -41-27.8004 105.902   2
   2   7 -38 107.305 106.064   2
   7  -9 -38 287.416 142.421   3
   2   7 -38 82.2582 70.1028   3
   9  -2  35 60.5423 107.716   3
   7  -9 -35 126.812 115.598   3
   2   7 -35 37.5229 75.0368   3
   9  -2  32 126.889 37.5310   1
   9  -2  32-25.5771 97.7922   3
   7  -9 -32 223.749 113.580   3
   2   7 -32-20.7096 72.5795   3
   7  -9 -29 556.597 128.511   3
   9  -2  29 328.533 109.654   3
   2   7 -29 451.478 60.1913   1
   7  -9 -29 415.209 121.496   2
   2   7 -29 502.193 82.7506   3
   7  -9 -29 493.926 59.4503   1
   7  -9 -26 1622.56 99.1839   1
   9  -2  26 1485.21 143.572   3
   7  -9 -26 1343.09 165.570   3
   7  -9 -26 1183.54 153.905   2
   2   7 -26 1507.88 99.9117   1
   2   7 -26 1450.02 115.502   3
   7  -9 -23 254.637 105.736   2
   2   7 -23 547.851 66.5543   1
   9  -2  23 448.239 95.7441   3
   7  -9 -23 504.811 62.6972   1
   9  -2  23 463.539 84.7336   2
   9  -2  20 898.425 116.499   3
   7  -9 -20 783.026 116.584   2
   7  -9 -20 978.155 83.2253   1
   9  -2  20 800.379 93.1653   2
   2   7 -20 1090.54 87.5569   1
   7  -9 -17 2419.23 191.581   3
   7  -9 -17 2682.68 173.364   2
   2   7 -17 2977.38 143.437   1
   9  -2  17 2647.46 146.299   2
   7  -9 -17 2522.89 137.395   1
   7  -9 -14 547.364 79.3028   2
   7  -9 -14 480.547 60.4011   1
   7  -9 -14 622.843 98.0743   3
   2   7 -11 18365.0 556.507   1
   7  -9 -11 17322.8 566.974   2
   7  -9 -11 17350.7 546.841   1
   7  -9 -11 17433.2 605.615   3
   2   7  -8 19107.9 584.025   1
   7  -9  -8 19094.1 574.524   1
   7  -9  -8 18215.6 574.121   2
   7  -9  -8 17610.2 610.248   3
   7  -9  -5 8969.18 340.659   3
   7  -9  -5 8904.74 302.745   2
   7  -9  -2 7988.74 299.630   3
  -7   9   2 7908.82 260.371   2
   2   7   1 4165.90 195.736   1
   7  -9   1 4251.39 182.223   1
  -7   9  -1 3946.69 142.448   2
   2   7   4 14806.5 500.243   1
   7  -9   4 15385.1 481.130   1
   7  -9   7 26068.2 754.046   1
   2   7   7 24489.1 773.438   1
   2   7  10 10465.6 382.475   1
   2   7  10 11119.1 417.243   3
   7  -9  10 10527.3 362.081   1
   7  -9  13 1282.24 95.8443   1
  -7   9 -13 1095.34 52.2328   2
   2   7  13 1196.72 110.328   2
   2   7  13 1468.84 111.224   1
   2   7  13 1438.88 135.856   3
  -7   9 -16 16900.9 490.767   2
   2   7  16 17414.4 584.291   2
   2   7  16 16538.3 554.397   1
   2   7  16 18089.0 626.708   3
   7  -9  16 17960.5 542.260   1
  -7   9 -19 11771.1 372.360   2
   2   7  19 12282.1 457.794   2
   2   7  19 11708.4 413.789   1
   7  -9  19 12675.1 407.136   1
   2   7  22 1675.14 111.655   1
  -7   9 -22 1419.64 100.480   2
   2   7  22 1455.46 153.039   2
   2   7  22 1875.90 186.379   3
   7  -9  22 1861.06 113.742   1
   2   7  25 3663.61 264.284   3
  -7   9 -25 3400.35 164.727   2
   7  -9  25 3591.74 167.814   1
   2   7  25 3910.13 236.963   2
   7  -9  28-27.1397 60.1793   1
   2   7  28 6.33859 102.440   2
  -7   9 -28-38.4192 73.4000   2
   9  -2 -28 133.996 112.561   3
   2   7  28 32.6982 44.6314   1
   2   7  28-32.7624 141.073   3
   9  -2 -31 643.690 133.891   3
  -7   9 -31 497.363 92.1200   2
   2   7  31 304.220 144.864   3
   7  -9  31 463.314 65.7243   1
  -7   9 -34 567.663 99.6824   2
   9  -2 -34 530.182 148.715   2
   9  -2 -34 539.129 130.872   3
   9  -2 -37-60.3968 133.730   2
   9  -2 -37 78.7704 122.498   3
   9  -2 -40-88.5576 126.052   3
   9  -2 -43 131.268 140.966   3
   6  -9 -39 9.47196 114.100   3
   3   6 -39 21.0894 108.225   2
   3   6 -36-177.634 101.852   3
   6  -9 -36 131.487 131.166   2
   6  -9 -36 165.210 128.200   3
   3   6 -33-162.170 107.704   3
   6  -9 -33 129.947 114.858   3
   9  -3  30-118.914 124.405   3
   9  -3  30 271.645 46.4052   1
   3   6 -30-12.3453 101.683   3
   6  -9 -30 359.914 125.576   3
   6  -9 -27 973.004 142.620   2
   6  -9 -27 1156.21 82.8278   1
   3   6 -27 897.972 110.648   3
   3   6 -27 1242.40 84.1561   1
   6  -9 -27 1102.13 152.083   3
   9  -3  27 892.688 125.863   3
   3   6 -24 1424.51 93.5261   1
   6  -9 -24 1369.91 91.6855   1
   6  -9 -24 1246.25 146.317   2
   9  -3  24 1225.16 128.889   3
   6  -9 -24 1127.98 162.046   3
   6  -9 -21 27.7940 43.6556   1
   9  -3  21 119.252 51.8714   2
   3   6 -21 73.2634 43.9802   1
   9  -3  21-45.6007 83.7167   3
   6  -9 -21-5.37652 83.0617   2
   6  -9 -18 6323.44 244.693   1
   3   6 -18 6729.59 244.412   1
   6  -9 -18 6492.23 294.534   2
   9  -3  18 6379.21 249.308   2
   6  -9 -15 10129.7 423.907   3
   3   6 -15 11097.4 363.124   1
   6  -9 -15 11119.8 403.667   2
   6  -9 -15 10871.4 363.607   1
   9  -3  15 10640.8 355.482   2
   6  -9 -12 4500.16 192.140   1
   6  -9 -12 4409.95 210.079   2
   6  -9 -12 4296.60 234.197   3
   3   6  -9 15299.9 480.607   1
  -6   9   9 14844.4 482.501   2
   6  -9  -9 14131.4 513.246   3
   6  -9  -9 15509.9 476.490   1
   6  -9  -9 14838.1 482.169   2
   6  -9  -6 8333.66 294.395   1
  -6   9   6 8086.87 285.871   2
   6  -9  -6 8240.93 318.977   3
  -6   9   3 41278.8 1131.92   2
   6  -9  -3 39976.2 1166.02   3
   6  -9   0 18012.5 549.478   3
  -6   9   0 17585.3 516.854   2
   6  -9   0 17963.9 552.347   1
   3   6   0 18385.4 568.560   1
   3   6   3 14082.8 460.785   1
  -6   9  -3 13688.6 395.707   2
   6  -9   3 14455.5 445.602   1
   6  -9   3 13292.4 420.950   3
   3   6   6 2906.21 157.070   1
   6  -9   6 2715.71 111.849   3
   6  -9   6 3031.97 144.182   1
   6  -9   9 4758.33 191.872   1
   3   6   9 4516.25 207.194   1
   6  -9   9 4286.89 135.329   3
   3   6  12 16863.1 575.228   3
   6  -9  12 16372.3 512.765   1
   3   6  12 15828.4 534.855   1
   3   6  15 8558.53 346.351   2
   3   6  15 8300.07 331.231   1
   3   6  15 9058.90 382.640   3
   3   6  18 2498.23 184.180   3
   3   6  18 2211.47 137.365   1
  -6   9 -18 2107.75 109.634   2
   3   6  18 2639.76 167.809   2
   6  -9  18 2459.51 131.334   1
   6  -9  21 84.8977 49.4302   1
   3   6  21-58.3623 109.549   3
  -6   9 -21-11.6622 48.9413   2
   3   6  21 138.566 53.3565   1
   3   6  21-30.2445 81.7207   2
   6  -9  24 2566.07 140.672   1
  -6   9 -24 2644.39 142.411   2
   3   6  24 2735.18 194.911   2
   3   6  24 2606.71 136.694   1
   3   6  24 2471.29 213.619   3
   9  -3 -27 1605.17 179.081   3
   3   6  27 1594.50 160.735   2
   3   6  27 1341.92 95.6904   1
   3   6  27 1535.43 179.876   3
  -6   9 -27 1441.44 112.804   2
   6  -9  27 1676.85 106.830   1
   9  -3 -30 1634.57 84.2148   1
   3   6  30 1438.68 82.5672   1
   3   6  30 1447.71 190.137   3
   9  -3 -30 1390.35 169.707   3
  -6   9 -30 1437.60 121.600   2
   9  -3 -33 55.7079 107.423   2
  -6   9 -33-78.5646 76.6336   2
   9  -3 -33-15.4225 104.089   3
   9  -3 -36 143.412 123.072   2
   9  -3 -36 135.605 118.557   3
  -6   9 -36-36.1890 84.8149   2
  -6   9 -39 4.88030 82.4451   2
   9  -3 -39 56.9349 115.929   3
   9  -3 -42 16.7071 132.482   3
   4   5 -40-133.648 130.341   2
   4   5 -37-28.8150 104.764   3
   5  -9 -37 349.317 138.622   3
   4   5 -37 93.7591 114.039   2
   4   5 -34-113.580 100.390   3
   9  -4  34-142.308 128.702   3
   5  -9 -34 113.616 110.988   3
   4   5 -31-28.3738 103.176   3
   9  -4  31-95.4862 112.750   3
   9  -4  31 168.142 40.2780   1
   5  -9 -31 318.596 120.008   3
   9  -4  28 167.168 46.0625   1
   4   5 -28 78.3705 43.4973   1
   5  -9 -28 147.513 103.415   3
   5  -9 -25 3075.90 140.329   1
   9  -4  25 2518.99 176.959   3
   5  -9 -25 2773.06 218.698   3
   4   5 -25 3120.03 139.617   1
   5  -9 -25 2908.46 207.469   2
   5  -9 -22 1469.15 142.969   2
   5  -9 -22 1459.30 97.2224   1
   4   5 -22 1488.16 93.6571   1
   9  -4  22 1097.44 120.658   3
   4   5 -19 19.0237 39.3269   1
   5  -9 -19 101.151 46.6362   1
   9  -4  19 141.828 50.3686   2
   5  -9 -16 6354.21 306.635   3
   9  -4  16 6612.96 238.512   2
   5  -9 -16 6683.06 248.969   1
   4   5 -16 6450.03 244.229   1
   5  -9 -16 6530.19 283.494   2
   9  -4  13 36066.2 1009.53   2
   5  -9 -13 36275.6 1034.40   1
   5  -9 -13 37164.3 1068.92   2
   5  -9 -13 36106.3 1100.52   3
   4   5 -13 35877.8 1032.48   1
  -5   9  10 20315.3 636.718   2
   4   5 -10 20974.9 625.791   1
   5  -9 -10 20319.2 668.053   3
   5  -9 -10 20786.2 624.946   1
   5  -9  -7 10182.4 335.575   1
  -5   9   7 9631.31 333.852   2
   5  -9  -7 9384.11 355.581   3
  -5   9   7 9528.94 334.511   1
  -5   9   4 3519.90 150.205   2
   5  -9  -4 3534.53 169.353   3
  -5   9   4 3395.02 160.503   1
  -5   9   1 59694.4 1625.48   2
   5  -9  -1 60433.1 1653.78   1
  -5   9   1 59993.7 1659.17   1
   5  -9  -1 59364.3 1649.20   3
   5  -9   2 62815.7 1716.71   3
   5  -9   2 65520.7 1740.14   1
  -5   9  -2 60929.5 1739.06   1
   5  -9   5 17080.5 513.216   1
   5  -9   5 15928.1 471.228   3
   5  -9   8 2274.28 124.115   1
  -5   9  -8 2169.10 122.745   1
   5  -9  11 5929.96 235.002   1
   4   5  11 6306.33 256.251   1
   4   5  14 18284.0 609.149   1
   5  -9  14 19790.9 592.147   1
   4   5  14 19650.6 656.187   3
   4   5  17 10268.2 381.407   2
   5  -9  17 9714.68 339.544   1
   4   5  17 9548.58 359.483   1
   4   5  17 10117.9 411.568   3
   4   5  20-12.2747 90.2159   3
   4   5  20 36.5318 53.6838   1
   5  -9  20 82.3204 48.2907   1
   4   5  20 23.4094 63.7604   2
   4   5  23 79.7746 92.5686   3
  -5   9 -23 194.824 56.6355   2
   4   5  23 143.530 49.9470   1
   5  -9  23 149.129 53.6206   1
   4   5  23 248.437 77.0431   2
   5  -9  26 3158.34 154.117   1
   4   5  26 3478.16 210.440   2
   4   5  26 3474.58 246.526   3
   9  -4 -26 3119.92 233.834   3
  -5   9 -26 3055.27 164.813   2
   4   5  26 2933.68 145.516   1
   9  -4 -29 539.493 135.929   3
   4   5  29 634.570 60.1720   1
   4   5  29 677.795 134.939   3
   4   5  29 576.536 119.551   2
   9  -4 -29 639.930 61.2953   1
  -5   9 -29 726.471 90.5641   2
   9  -4 -32 105.931 30.3920   1
   4   5  32 92.8037 103.867   3
   9  -4 -32 15.6030 112.515   3
  -5   9 -32 122.668 68.7899   2
   9  -4 -32-28.6203 31.9861   1
   9  -4 -35-89.4317 130.581   3
  -5   9 -35 60.0214 75.7604   2
   9  -4 -35-8.28050 115.177   2
   9  -4 -38 33.1418 133.529   3
  -5   9 -38 195.542 92.3147   2
   9  -4 -38 79.4590 135.957   2
  -5   9 -41 26.5945 90.6170   2
   9  -4 -41-162.293 163.414   3
   5   4 -38-76.7897 99.9777   3
   5   4 -38-61.3471 119.268   2
   5   4 -35 181.436 90.5530   3
   4  -9 -35 239.371 130.901   3
   5   4 -32 445.817 42.4567   1
   9  -5  32 498.805 100.813   3
   4  -9 -32 401.987 120.871   3
   9  -5  32 444.491 45.7395   1
   5   4 -32 412.342 105.283   3
   5   4 -29 737.965 63.0213   1
   4  -9 -29 634.836 133.922   3
   9  -5  29 705.412 64.4730   1
   5   4 -29 532.433 107.961   3
   9  -5  29 536.851 96.6973   3
   4  -9 -26 395.082 125.012   3
   9  -5  26 439.089 64.8855   1
   5   4 -26 466.868 62.1460   1
   9  -5  26 372.982 87.5121   3
   5   4 -23 1711.19 100.702   1
   9  -5  23 1723.29 133.520   3
   4  -9 -23 1998.32 113.593   1
   4  -9 -20 8519.24 299.028   1
   9  -5  20 8063.66 319.599   3
   5   4 -20 8633.76 291.602   1
   5   4 -17 20124.2 610.265   1
   4  -9 -17 21189.5 621.500   1
   4  -9 -17 19541.6 694.479   3
   4  -9 -14 5969.18 285.796   3
   9  -5  14 6211.86 211.806   2
   4  -9 -14 5807.44 232.792   1
  -4   9  14 6371.83 301.651   3
  -4   9  14 6109.89 234.702   1
   4  -9 -11 2564.66 166.796   3
   9  -5  11 2676.46 105.797   2
  -4   9  11 2465.10 133.589   1
   4  -9 -11 2634.35 135.410   1
   4  -9  -8 13957.0 437.005   1
  -4   9   8 13144.1 434.908   1
  -4   9   8 12942.2 435.964   2
   4  -9  -8 13527.0 464.850   3
  -4   9   5 7282.40 287.884   3
  -4   9   5 6811.85 263.337   1
  -4   9   5 7008.22 255.688   2
   4  -9  -5 7132.01 277.427   3
  -4   9   2 78.4906 41.8396   3
  -4   9   2 65.8136 35.8680   1
   4  -9  -2 39.8278 33.5339   3
  -4   9  -1 10186.1 332.244   3
  -4   9  -1 9518.47 338.705   1
   4  -9   1 9346.34 319.835   3
   4  -9   1 10173.6 339.149   1
  -4   9  -4 10583.2 331.532   3
   4  -9   4 10439.2 356.420   1
  -4   9  -7 25239.8 773.913   1
   4  -9   7 27230.2 777.735   1
   4  -9  10 31743.2 898.068   1
  -4   9 -10 29885.5 893.872   1
   4  -9  13 5689.00 225.466   1
  -4   9 -13 5282.73 219.611   1
  -4   9 -16 4827.43 206.069   1
   5   4  16 5247.49 238.449   2
   5   4  16 4859.24 226.826   1
   5   4  16 5256.84 265.048   3
   4  -9  16 5353.15 213.124   1
   4  -9  19 6972.23 263.883   1
   5   4  19 7746.44 343.114   3
   5   4  19 6998.37 304.379   2
   5   4  19 6703.49 281.193   1
   4  -9  22 1145.35 93.8645   1
   5   4  22 1034.13 95.3690   1
   5   4  22 1000.34 143.356   3
   5   4  22 1100.21 122.116   2
   9  -5 -22 940.623 142.152   3
   4  -9  25 568.183 73.6312   1
   9  -5 -25 439.589 122.180   3
   5   4  25 471.378 66.7391   1
   9  -5 -25 547.993 123.026   2
   5   4  25 659.438 130.792   3
   5   4  25 561.058 107.584   2
   9  -5 -28 579.041 65.6384   1
   9  -5 -28 500.732 145.757   3
   5   4  28 702.307 149.767   3
   5   4  28 763.912 127.706   2
   5   4  28 591.498 68.9202   1
  -4   9 -28 770.949 97.8996   2
   5   4  31 43.7108 34.1224   1
   5   4  31-136.945 131.390   3
   9  -5 -31-63.4261 127.736   3
  -4   9 -31 4.35272 69.6924   2
   9  -5 -34-115.367 133.605   3
   5   4  34-162.115 143.336   3
  -4   9 -34-19.1164 79.1479   2
   9  -5 -37-58.9983 139.545   3
  -4   9 -37-50.9842 91.5660   2
   9  -5 -37-77.8057 130.817   2
  -4   9 -40-159.982 119.566   2
   6   3 -39-92.3665 112.561   3
   6   3 -39-217.195 140.847   2
   6   3 -36 238.390 101.155   3
   6   3 -33 2174.78 175.168   3
   6   3 -33 1554.59 61.3303   1
   9  -6  30 944.065 110.510   3
   3  -9 -30 799.239 143.015   3
   6   3 -30 855.277 125.739   3
   9  -6  30 980.532 74.1316   1
   3  -9 -27-22.5618 100.155   3
   6   3 -27 26.9639 40.4828   1
   9  -6  27-15.2931 65.1329   3
   9  -6  27 27.1614 43.4937   1
   9  -6  24 599.609 89.3371   3
   9  -6  24 615.194 77.5691   1
   3  -9 -24 706.370 136.573   3
   6   3 -24 657.748 70.6968   1
  -3   9  21 5616.62 284.519   2
   6   3 -21 6219.12 226.959   1
  -3   9  21 6011.53 326.366   3
   3  -9 -21 6377.90 238.036   1
   9  -6  21 5943.64 246.576   3
  -3   9  18 33394.3 993.485   1
  -3   9  18 34475.7 1056.68   2
   3  -9 -18 35395.7 1002.68   1
   3  -9 -15 19599.3 669.518   3
  -3   9  15 18676.1 592.736   1
  -3   9  15 20963.4 686.526   3
   3  -9 -15 19519.9 597.994   1
  -3   9  12 3176.51 154.554   1
   3  -9 -12 2966.40 185.864   3
   3  -9 -12 3232.38 155.559   1
   9  -6  12 3212.83 115.198   2
  -3   9   9 259.212 49.0796   1
   9  -6   9 321.822 26.3227   2
   3  -9  -9 209.493 59.4901   3
   3  -9  -9 322.174 53.6330   1
   3  -9  -6 200.255 53.2666   3
  -3   9   6 302.631 51.9948   1
  -3   9   6 235.219 48.3272   2
   3  -9  -6 270.361 51.8360   1
  -3   9   3 3003.07 158.572   3
  -3   9   3 2895.62 148.592   1
   3  -9  -3 2817.84 146.105   3
  -3   9   0 30535.1 913.294   1
   3  -9   0 30682.7 908.276   1
  -3   9   0 32565.7 911.364   3
   3  -9   3 123561. 3385.54   1
  -3   9  -3 127405. 3365.61   3
  -3   9  -6 54754.4 1481.86   3
   3  -9   6 54404.9 1524.35   1
   3  -9   9 49791.1 1379.32   1
  -3   9  -9 48288.8 1375.98   1
  -3   9 -12 55691.3 1562.10   1
   3  -9  12 56527.7 1564.09   1
   3  -9  15 4689.70 197.842   1
  -3   9 -15 4321.77 191.744   1
  -3   9 -18 5437.24 220.100   1
   6   3  18 5701.19 253.567   2
   3  -9  18 4992.96 218.791   1
   6   3  18 5606.29 279.355   3
   6   3  21 11057.2 396.172   1
   9  -6 -21 11875.7 483.065   3
   3  -9  21 11174.3 382.809   1
   6   3  21 11386.1 462.722   3
   6   3  21 10931.9 417.421   2
   9  -6 -21 11421.2 452.082   2
   6   3  24 7157.97 338.677   3
   6   3  24 5979.97 251.104   1
   6   3  24 6317.29 293.685   2
   9  -6 -24 6175.93 336.886   3
   9  -6 -24 6037.70 235.146   1
   9  -6 -24 6580.97 323.521   2
   9  -6 -27 4288.93 284.107   3
   6   3  27 4518.48 248.270   2
   6   3  27 3618.65 170.604   1
   9  -6 -27 3718.47 161.273   1
   9  -6 -27 3969.25 258.449   2
   6   3  27 4540.66 277.335   3
   6   3  30 4304.66 277.778   3
   9  -6 -30 3796.91 281.837   3
   9  -6 -30 3829.37 143.163   1
  -3   9 -30 4065.46 216.156   2
  -3   9 -33 973.671 125.578   2
   9  -6 -33 665.541 159.158   3
   6   3  33 673.623 163.640   3
   9  -6 -36-51.8430 138.354   3
   9  -6 -36 8.46659 129.017   2
  -3   9 -36 147.634 91.8127   2
   9  -6 -39 8.88266 141.326   3
  -3   9 -39 44.4832 104.963   2
  -3   9 -42-53.1137 119.199   2
   7   2 -40 80.5031 108.440   3
   7   2 -37-163.884 116.328   3
   7   2 -37-195.699 146.864   2
   7   2 -34 70.0102 97.3306   3
   7   2 -31-164.499 129.220   3
   9  -7  31-3.69479 48.7055   1
   9  -7  28 805.201 92.1232   3
   7   2 -28 936.608 70.8216   1
   9  -7  28 1020.63 79.2034   1
   7   2 -28 753.507 134.022   3
   9  -7  25 970.154 87.2147   1
  -2   9  25 963.191 159.893   3
   9  -7  25 985.597 93.1841   3
   7   2 -25 1022.22 82.2398   1
   2  -9 -25 1007.28 151.751   3
  -2   9  22 92.0740 62.1538   1
   9  -7  22 260.640 61.6324   3
  -2   9  22 100.801 110.580   3
   9  -7  22 212.137 63.6845   1
  -2   9  22 335.362 94.0487   2
   9  -7  19 2994.68 153.898   1
  -2   9  19 2699.89 209.239   3
  -2   9  19 2759.39 144.525   1
  -2   9  19 2866.89 182.541   2
   9  -7  19 2644.47 135.278   3
  -2   9  16 7746.69 295.634   1
   2  -9 -16 7862.88 355.831   3
  -2   9  16 8329.58 336.937   2
   2  -9 -16 8644.77 306.841   1
  -2   9  16 8587.62 372.647   3
  -2   9  13 4667.70 250.073   3
   2  -9 -13 4958.87 206.837   1
  -2   9  13 4590.46 202.273   1
   2  -9 -13 4471.65 237.915   3
   2  -9 -10 20937.6 675.885   3
   2  -9 -10 21295.0 638.642   1
  -2   9  10 20019.6 638.008   1
   2  -9  -7 18431.8 616.158   3
  -2   9   7 18653.0 599.065   1
  -2   9   4 19000.0 613.337   1
  -2   9   4 20536.8 628.986   3
  -2   9   1 58984.2 1685.04   1
  -2   9   1 62466.4 1684.04   3
   2  -9  -1 59623.3 1679.85   1
   2  -9   2 28257.4 828.053   1
  -2   9  -2 29204.2 814.267   3
  -2   9  -5 45324.6 1251.08   3
   2  -9   5 45112.5 1282.77   1
   2  -9   8 7882.11 273.108   1
  -2   9  -8 7488.50 269.582   1
  -2   9 -11 8468.56 305.656   1
   2  -9  11 7897.76 300.096   1
   2  -9  14 32807.0 960.112   1
  -2   9 -14 32906.4 955.941   1
  -2   9 -17 15589.6 505.254   1
   7   2  17 15876.4 531.340   2
   2  -9  17 16003.1 516.103   1
   9  -7 -17 16431.8 560.961   2
   9  -7 -20 25089.8 730.987   1
  -2   9 -20 24145.5 732.596   1
   9  -7 -20 23848.5 801.820   2
   7   2  20 25250.0 817.772   3
   7   2  20 24942.9 775.930   2
   9  -7 -23 13822.1 438.185   1
   7   2  23 14988.1 545.222   3
   9  -7 -23 13622.2 553.374   3
   9  -7 -23 13294.5 526.485   2
  -2   9 -23 12738.1 435.091   1
   7   2  23 14367.3 499.553   2
   9  -7 -26 2148.19 127.043   1
   7   2  26 3027.00 226.092   3
   9  -7 -26 2854.39 218.163   2
   7   2  26 1988.28 137.047   1
   9  -7 -26 2463.64 224.619   3
   7   2  26 2589.35 182.162   2
   7   2  29 604.755 140.647   3
   9  -7 -29 459.990 140.558   3
   9  -7 -29 653.728 146.438   2
   7   2  29 879.868 135.774   2
   9  -7 -29 687.011 65.5429   1
   7   2  29 376.093 69.2013   1
   7   2  32 95.4468 40.9035   1
   9  -7 -32-16.6900 118.003   3
   7   2  32 163.957 123.432   3
  -2   9 -32 85.2334 89.8191   2
   9  -7 -32 14.0095 39.9460   1
   7   2  35-98.9282 147.296   3
   9  -7 -35-88.0545 144.919   3
  -2   9 -35 95.5048 87.5823   2
  -2   9 -38-28.5683 96.2484   2
   9  -7 -38 18.0707 139.572   3
  -2   9 -41-126.187 121.645   2
   8   1 -41 7.23566 126.308   3
   8   1 -38-169.933 133.067   3
   8   1 -38 34.3779 121.051   2
   8   1 -35-144.452 130.192   3
   8   1 -32 451.222 137.925   3
   8   1 -29 2743.72 212.223   3
  -1   9  29 2598.99 242.458   3
   8   1 -29 2541.19 124.804   1
   9  -8  29 2294.97 131.745   1
   8   1 -26 245.201 54.7971   1
  -1   9  26 129.924 118.142   3
   9  -8  26 352.608 62.0522   1
  -1   9  26 131.723 93.3884   2
   9  -8  26 119.836 53.5245   3
   9  -8  23 976.175 82.4871   3
  -1   9  23 1023.70 134.319   2
  -1   9  23 864.016 89.2392   1
   9  -8  23 863.300 94.4775   1
  -1   9  23 825.202 154.077   3
  -1   9  20 1590.73 176.761   3
  -1   9  20 1419.34 109.874   1
   9  -8  20 1796.76 120.573   1
  -1   9  20 1701.36 150.530   2
   9  -8  20 1654.10 97.7903   3
   9  -8  17 453.245 68.9090   1
  -1   9  17 322.107 63.7373   1
  -1   9  17 176.182 92.5464   3
  -1   9  17 295.303 78.4001   2
  -1   9  14 1969.66 144.662   2
   1  -9 -14 1902.94 125.288   1
  -1   9  14 2089.96 127.699   1
  -1   9  14 2191.89 169.860   3
   1  -9 -11 8379.69 310.354   1
  -1   9  11 8021.14 308.518   1
   1  -9  -8 37875.0 1101.25   1
  -1   9   8 38135.1 1107.21   1
  -1   9   5 69091.5 1909.79   3
  -1   9   5 66839.8 1891.15   1
   9  -8   2 25883.9 721.373   2
  -1   9   2 26251.9 798.079   1
  -1   9   2 27409.1 799.684   3
  -1   9  -1 20580.7 680.779   1
  -1   9  -1 23328.2 675.686   3
   1  -9   1 22375.9 678.759   1
   9  -8  -1 21639.3 627.986   2
   1  -9   4 7121.35 283.812   1
  -1   9  -4 7746.08 270.709   3
   9  -8  -4 7287.89 260.440   2
   1  -9   7 323.826 59.2591   1
  -1   9  -7 278.129 55.9013   1
   9  -8  -7 206.856 46.1486   2
   1  -9  10 113.891 49.5201   1
   9  -8 -10 235.888 53.9551   2
  -1   9 -10 87.5498 47.9426   1
  -1   9 -13 10347.6 372.398   1
   9  -8 -13 11028.9 398.151   2
   1  -9  13 10898.9 380.895   1
   8   1  16 36128.4 1066.18   2
   9  -8 -16 37191.1 1047.82   1
  -1   9 -16 35166.3 1049.66   1
   9  -8 -16 37108.8 1097.44   2
  -1   9 -19 20006.7 579.811   3
  -1   9 -19 20472.1 638.427   1
   8   1  19 21391.5 707.935   3
   9  -8 -19 22334.4 637.143   1
   8   1  19 20649.5 664.354   2
   9  -8 -19 21849.5 705.349   2
   9  -8 -22 25966.8 844.043   2
  -1   9 -22 24924.5 755.820   1
   9  -8 -22 26062.0 750.618   1
   8   1  22 26107.8 798.959   2
   9  -8 -22 25769.2 876.641   3
   8   1  22 27128.8 851.441   3
  -1   9 -22 24389.3 700.210   3
  -1   9 -25 8489.14 299.301   1
  -1   9 -25 8490.65 261.872   3
   9  -8 -25 7918.13 293.611   1
   8   1  25 8663.10 358.722   2
   9  -8 -25 8144.90 389.836   2
   8   1  25 9186.12 398.885   3
   9  -8 -25 8180.73 408.979   3
   8   1  28-20.7193 116.671   3
   9  -8 -28 100.380 44.5620   1
   8   1  28-26.7599 72.6221   1
   9  -8 -28-24.5049 111.708   3
   8   1  28-63.9689 112.043   2
   9  -8 -28-56.3553 108.449   2
   8   1  31 603.659 68.0410   1
   9  -8 -31 828.483 156.191   3
   8   1  31 668.323 141.084   3
   9  -8 -31 828.029 67.5617   1
   9  -8 -31 592.290 140.174   2
   9  -8 -34 972.073 180.309   3
  -1   9 -34 1073.30 136.694   2
   8   1  34 974.985 164.090   3
  -1   9 -37 242.021 104.722   2
   9  -8 -37 284.410 140.921   3
  -1   9 -40-165.406 117.793   2
  -1   9 -43 64.2794 114.861   2
   9   0 -42-147.466 153.040   3
   9   0 -39-159.240 163.168   3
   9   0 -36-120.659 141.439   2
   9   0 -36-51.7812 138.384   3
   9   0 -33 119.150 48.1081   1
   9   0 -33 221.952 129.255   3
   9   0 -30 195.905 60.4829   1
   9  -9  30 159.230 62.6580   1
   9   0 -30 256.698 127.143   3
   0   9  27 1526.34 164.186   2
   0   9  27 1387.99 189.477   3
   9  -9  27 1240.92 103.958   1
   0   9  27 994.059 91.9309   1
   0   9  24 959.464 165.218   3
   0   9  24 733.484 86.7497   1
   9  -9  24 1162.31 98.0569   1
   0   9  24 852.948 137.271   2
   9  -9  21 729.191 60.8719   3
   0   9  21 765.375 147.660   3
   0   9  21 979.097 95.1271   1
   9  -9  21 878.072 93.9618   1
   0   9  21 824.677 126.487   2
   9  -9  18 5783.23 226.855   1
   0   9  18 4730.54 217.153   1
   0   9  18 5270.47 290.775   3
   0   9  18 5203.40 257.853   2
   9  -9  18 4583.76 170.254   3
   0   9  15 17609.2 630.363   3
   0   9  15 16450.2 565.360   1
   0   9  15 17678.4 596.455   2
   9  -9  15 18419.3 560.499   1
   0   9  12 32304.0 986.458   1
   0   9  12 31059.9 991.896   2
   0   9   9 23913.7 761.904   1
   9  -9   9 25011.9 741.274   1
   0  -9  -6 51366.9 1459.06   1
   0   9   6 51228.4 1470.15   1
   0   9   3 43517.6 1299.23   1
   0   9   3 46555.1 1310.62   3
   0   9   0 100.376 46.1074   3
   9  -9   0 120.482 27.0643   2
   0  -9   0 190.153 50.8922   1
   0   9   0 173.553 51.1977   1
   9  -9  -3 4941.69 192.807   2
   0  -9   3 5459.50 232.523   1
   0  -9   6 8542.26 326.259   1
   9  -9  -6 8592.18 303.646   2
   0  -9   9 336.276 67.0779   1
   9  -9  -9 336.869 61.5153   1
   9  -9  -9 350.277 62.5318   2
   0   9  -9 417.860 69.9999   1
   9  -9 -12 14782.5 561.139   3
   0   9 -12 15722.2 508.302   1
   9  -9 -12 15549.5 520.680   2
   9  -9 -12 15687.8 502.444   1
   9  -9 -15 22121.3 773.010   3
   9  -9 -15 22379.7 687.298   1
   0   9 -15 22590.9 694.711   1
   9  -9 -15 23608.3 734.599   2
   0   9 -18 6186.65 249.725   1
   9  -9 -18 6251.94 293.266   2
   9   0  18 5938.84 257.942   2
   9  -9 -18 6048.71 243.062   1
   0   9 -21 2224.48 113.394   3
   0   9 -21 2379.89 143.481   1
   9   0  21 2431.28 159.167   2
   9  -9 -21 2187.36 134.375   1
   9   0  21 2346.85 186.479   3
   9  -9 -21 2399.11 189.904   2
   0   9 -24 856.376 93.3743   1
   0   9 -24 931.672 72.7638   3
   9  -9 -24 821.486 139.881   2
   9  -9 -24 676.904 86.1661   1
   9   0  24 926.526 113.548   2
   9  -9 -24 1045.39 155.240   3
   9   0  24 905.264 138.670   3
   9  -9 -27-32.7057 111.335   3
   9  -9 -27-102.247 105.296   2
   9  -9 -27 60.7835 44.9513   1
   9   0  27-92.1831 104.090   3
   9   0  27-69.2282 81.1403   2
   0   9 -27-31.9471 53.3428   1
   0   9 -27 22.4015 37.1789   3
   9  -9 -30 834.802 70.6318   1
   9   0  30 583.676 131.755   3
   9  -9 -30 839.637 142.891   2
   9   0  30 614.708 77.7384   1
   0   9 -30 806.349 68.2538   3
   9  -9 -30 760.331 148.787   3
   9  -9 -33 36.1602 113.057   3
   9   0  33-112.846 126.372   3
   9  -9 -33-64.2963 121.183   2
   9  -9 -33-36.4301 42.8717   1
   9   0  36-47.4976 121.460   3
   9  -9 -36-28.3175 122.818   3
   0   9 -39-148.612 119.033   2
   9  -9 -39-106.700 132.128   3
   0   9 -42-84.6726 123.244   2
   1   9 -41-105.616 118.863   2
   1   9 -38 167.718 117.911   2
   9 -10 -38 118.542 153.673   3
   9 -10 -35 8.46744 119.275   2
   9 -10 -35-189.981 176.879   3
  10  -1  35-142.701 139.537   3
  10  -1  32-2.63971 49.0386   1
   9 -10 -32-45.7440 50.7715   1
   9 -10 -32 9.16280 124.769   3
   9 -10 -32 15.8465 99.5975   2
   1   9 -32-52.3785 61.2096   3
   9 -10 -29 2021.50 111.581   1
   1   9 -29 1796.15 116.787   1
   9 -10 -29 1937.94 186.631   2
   9 -10 -29 1584.15 189.710   3
  10  -1  29 1534.02 174.064   3
   1   9 -29 1313.43 104.249   3
   9 -10 -26 3602.79 263.463   3
   9 -10 -26 4103.60 256.026   2
   1   9 -26 3887.43 178.132   1
  10  -1  26 3722.14 245.030   3
   9 -10 -26 3981.64 176.613   1
  10  -1  26 3709.55 213.687   2
   1   9 -26 3629.26 165.821   3
  10  -1  23 131.593 93.6694   3
   1   9 -23 291.366 60.3669   3
   9 -10 -23 316.734 68.7435   1
   1   9 -23 322.974 74.0624   1
   9 -10 -23 396.552 113.748   2
  10  -1  23 387.345 89.3305   2
   9 -10 -20 37.3623 53.3694   1
   9 -10 -20 117.490 87.3162   2
  10  -1  20 88.1211 62.1406   2
   1   9 -20 86.7656 61.7780   1
   1   9 -17 18695.6 580.542   1
   9 -10 -17 17902.8 666.222   3
   9 -10 -17 18492.2 622.681   2
   9 -10 -17 18121.7 573.114   1
  10  -1  17 17800.6 580.268   2
   9 -10 -14 45270.2 1426.68   3
   9 -10 -14 48235.9 1350.44   1
   9 -10 -14 47279.8 1378.28   2
   1   9 -14 48143.0 1354.31   1
   9 -10 -11 31601.9 961.791   2
   1   9 -11 33542.9 961.386   1
   9 -10 -11 32774.2 953.101   1
   9 -10 -11 30751.0 1012.75   3
   9 -10  -8 38531.6 1070.16   1
   9 -10  -8 36277.2 1059.69   2
   1   9  -8 35882.0 1075.97   1
   9 -10  -8 35585.1 1114.31   3
   9 -10  -5 4041.54 175.589   2
   9 -10  -2 1103.88 72.2162   2
   9 -10   1 477.857 68.5684   1
   1   9   1 305.831 61.9348   1
   9 -10   4 141.478 47.2859   1
   1   9   4 166.662 59.6257   3
   1   9   4 249.792 57.0267   1
   9 -10   7 23214.5 688.409   1
   1   9   7 21084.6 705.691   1
   9 -10  10 57207.2 1589.64   1
   1   9  10 55732.0 1614.77   1
   9 -10  13 63997.2 1726.35   1
   1   9  13 60873.1 1756.40   2
   1   9  13 59808.4 1745.10   1
   1   9  13 61374.6 1799.34   3
   1   9  16 40976.7 1125.75   2
   1   9  16 43118.8 1179.99   3
   9 -10  16 42906.0 1078.45   1
   1   9  16 39822.1 1094.89   1
   9 -10  19 10305.7 357.072   1
   1   9  19 9713.45 400.191   2
   1   9  19 10433.1 445.202   3
   1   9  22 459.094 77.7399   1
   1   9  22 413.015 134.366   3
   9 -10  22 522.751 79.5605   1
   1   9  22 266.823 111.814   2
   9 -10  25 63.5462 62.4108   1
   1   9  25 152.553 59.0774   1
   1   9  25 131.752 115.510   3
   1   9  25-55.9220 101.370   2
   1   9  28 616.691 162.615   3
   1   9  28 592.041 132.611   2
   1   9  28 638.356 78.8613   1
   9 -10  28 700.398 87.4426   1
  10  -1 -31 173.285 123.636   3
   9 -10  31 58.3409 57.7549   1
  10  -1 -31 35.1371 52.0516   1
  10  -1 -34 485.795 138.423   3
  10  -1 -34 661.836 62.2775   1
  10  -1 -37 174.673 134.203   3
  10  -1 -40-136.298 137.763   3
  10  -1 -43 173.940 141.177   3
   2   8 -39-136.260 117.400   2
   2   8 -36-23.4895 72.3928   3
   8 -10 -36-47.6653 155.017   3
   2   8 -33 183.054 68.0620   3
   8 -10 -33-27.1360 134.960   3
  10  -2  33 108.737 106.087   3
   8 -10 -33 111.518 115.808   2
   8 -10 -30 295.906 58.3489   1
   2   8 -30 214.658 69.7726   3
   8 -10 -30 284.762 114.717   2
   8 -10 -30 206.126 123.027   3
   2   8 -30 156.599 57.2051   1
  10  -2  30 125.934 99.3781   3
  10  -2  27 310.690 102.154   3
   2   8 -27 295.524 68.8277   3
   8 -10 -27 351.862 121.959   3
   2   8 -27 356.017 63.8094   1
   8 -10 -27 399.614 61.7862   1
   8 -10 -27 358.001 111.984   2
   2   8 -24 809.546 86.9241   1
  10  -2  24 989.040 129.978   3
   8 -10 -24 690.387 77.8615   1
  10  -2  24 674.857 97.3605   2
   8 -10 -24 720.345 129.387   2
  10  -2  21 1661.50 125.857   2
   8 -10 -21 1539.98 159.098   2
   8 -10 -21 1665.37 112.456   1
  10  -2  21 1554.07 149.632   3
   2   8 -21 1677.29 115.724   1
   8 -10 -18 1911.53 177.600   3
   8 -10 -18 1997.58 126.849   1
   2   8 -18 2023.25 126.160   1
  10  -2  18 1863.52 126.443   2
   8 -10 -18 2227.41 166.311   2
   8 -10 -15 8080.12 368.287   3
   8 -10 -15 8167.34 301.714   1
   2   8 -15 8043.56 302.191   1
   8 -10 -15 8353.55 339.451   2
   8 -10 -12 1865.50 157.624   3
   8 -10 -12 2226.05 141.871   2
   2   8 -12 1934.71 125.362   1
   8 -10 -12 1850.02 120.841   1
   8 -10  -9 1177.47 96.3729   1
   2   8  -9 1176.72 100.687   1
   8 -10  -9 1051.74 117.160   3
   8 -10  -9 1162.21 96.4522   2
   8 -10  -6 215.010 72.6835   3
   8 -10  -6 328.382 60.9713   1
   8 -10  -6 402.436 57.6632   2
   8 -10  -3 2553.14 154.186   3
   8 -10   0 3547.79 174.573   3
   2   8   0 3717.78 187.944   1
   8 -10   0 3458.42 171.496   1
   2   8   3 13711.9 475.836   1
   8 -10   3 13765.7 453.958   1
   8 -10   6 21851.9 648.837   1
   2   8   6 19850.8 667.950   1
   8 -10   9 29706.5 856.410   1
   2   8   9 27716.4 880.924   1
   2   8  12 12047.3 459.613   3
   8 -10  12 11334.8 392.475   1
   2   8  12 10885.3 414.504   1
   2   8  15 729.713 126.218   3
   2   8  15 868.987 110.160   2
  -8  10 -15 812.461 43.2196   2
   2   8  15 854.790 100.497   1
   8 -10  15 926.382 90.4544   1
   2   8  18 2490.09 204.394   3
   8 -10  18 2791.82 148.799   1
   2   8  18 2241.43 174.438   2
   2   8  18 2192.21 152.405   1
  -8  10 -18 2404.04 101.420   2
   2   8  21 2279.29 176.218   2
   2   8  21 1750.20 136.359   1
  -8  10 -21 2084.40 106.270   2
   8 -10  21 2154.29 134.806   1
   2   8  21 2219.12 202.115   3
  -8  10 -24 145.652 56.8006   2
   2   8  24 148.300 69.7324   1
   8 -10  24 207.225 72.0172   1
   2   8  24 101.433 128.491   3
   2   8  24 268.068 107.063   2
   8 -10  27 1487.45 113.343   1
  -8  10 -27 1274.54 102.695   2
   2   8  27 1419.65 200.656   3
   2   8  27 1202.74 102.433   1
   2   8  27 1576.68 168.875   2
   2   8  30-53.7852 142.168   3
   2   8  30-89.5801 58.6270   1
  -8  10 -30-38.2867 77.9310   2
   8 -10  30 2.64377 60.8947   1
  10  -2 -33 272.992 126.055   3
  10  -2 -33-49.2676 55.6262   1
  10  -2 -36-168.510 146.399   2
  10  -2 -36 201.313 126.473   3
  10  -2 -39 303.449 139.552   3
  10  -2 -42 134.293 141.832   3
   3   7 -40 355.491 128.645   2
   3   7 -37 573.190 102.553   3
   7 -10 -37 893.816 185.816   3
   3   7 -34 1590.45 135.482   3
   7 -10 -34 1673.60 215.494   3
  10  -3  34 1643.26 180.331   3
  10  -3  31 3127.71 220.030   3
   7 -10 -31 3462.30 253.916   2
   7 -10 -31 3412.78 265.933   3
   3   7 -31 3111.11 143.948   1
   3   7 -31 3163.54 184.191   3
  10  -3  31 3309.50 145.881   1
   7 -10 -28 2668.58 228.600   3
   3   7 -28 2530.90 167.970   3
  10  -3  28 2767.21 202.963   3
   3   7 -28 3100.59 143.757   1
   7 -10 -28 2813.83 140.953   1
   7 -10 -28 3099.46 228.349   2
   3   7 -25 134.321 53.5825   1
  10  -3  25 166.550 81.6951   3
   7 -10 -25 229.137 54.9226   1
   7 -10 -25 89.1505 108.569   2
   7 -10 -25 170.060 97.2644   3
   7 -10 -22 1984.08 181.831   2
  10  -3  22 2146.24 158.904   3
   3   7 -22 2386.02 129.239   1
   7 -10 -22 2225.80 127.761   1
  10  -3  22 2351.59 142.101   2
   7 -10 -19 853.994 115.786   2
   3   7 -19 1019.53 88.3243   1
   7 -10 -19 1004.20 88.2357   1
  10  -3  19 939.932 87.6591   2
   7 -10 -16 145.606 76.7068   3
   7 -10 -16 104.897 51.9865   1
   7 -10 -16 119.837 69.3114   2
  10  -3  16 114.833 47.1865   2
   3   7 -16 105.748 48.1484   1
   3   7 -13 8544.44 302.608   1
   7 -10 -13 8092.03 299.788   1
   7 -10 -13 7569.27 314.603   2
   7 -10 -13 7962.05 355.067   3
   7 -10 -10 100770. 2825.59   3
   7 -10 -10 100385. 2778.64   2
   7 -10 -10 102650. 2767.88   1
   3   7 -10 103232. 2773.24   1
   7 -10  -7 91527.5 2484.18   2
   3   7  -7 92274.7 2498.33   1
   7 -10  -7 94669.5 2493.19   1
  -7  10   7 88944.1 2480.20   2
   7 -10  -7 88781.2 2526.94   3
   7 -10  -4 56398.6 1577.13   3
  -7  10   4 55067.5 1527.59   2
   3   7  -1 22749.4 689.161   1
   7 -10  -1 21565.3 675.280   3
  -7  10   1 22231.6 637.194   2
   7 -10  -1 21952.2 671.696   1
   3   7   2 704.705 79.1458   1
   7 -10   2 756.510 73.4247   1
  -7  10  -2 522.554 44.5561   2
   7 -10   2 624.807 64.2043   3
   7 -10   5 6640.63 231.657   3
   3   7   5 6558.83 275.290   1
   7 -10   5 6510.00 255.756   1
   7 -10   8 143.083 30.2856   3
   3   7   8 137.837 61.4592   1
   7 -10   8 157.449 51.8487   1
   3   7  11 6220.19 272.464   1
   7 -10  11 6372.50 253.739   1
   3   7  11 6571.87 304.838   3
   7 -10  14 24797.5 751.819   1
   3   7  14 25548.3 831.415   3
   3   7  14 24856.7 782.096   1
   7 -10  17 13961.5 437.283   1
   3   7  17 13813.6 483.612   2
   3   7  17 12443.0 451.643   1
  -7  10 -17 12291.2 382.100   2
   3   7  17 13565.6 519.952   3
   3   7  20 12182.7 496.410   3
  -7  10 -20 11480.5 369.034   2
   3   7  20 11502.8 453.196   2
   3   7  20 11184.2 415.388   1
  -7  10 -23 3835.74 173.482   2
   3   7  23 4017.27 239.769   2
   3   7  23 4037.63 192.380   1
   3   7  23 3956.09 274.106   3
   7 -10  23 4042.62 187.571   1
   3   7  26-15.9674 150.020   3
   3   7  26 58.6424 61.7435   1
   7 -10  26 23.4691 72.7119   1
  -7  10 -26-8.42340 74.7874   2
   3   7  26 42.3089 100.653   2
   3   7  29-4.79979 62.9731   1
  10  -3 -29 176.900 127.336   3
   3   7  29-102.744 163.439   3
  -7  10 -29-105.252 85.0829   2
   3   7  29-32.8456 124.283   2
   7 -10  29-13.7439 68.8428   1
  10  -3 -32 315.244 53.6249   1
  -7  10 -32 318.527 86.6033   2
   3   7  32 284.792 52.1609   1
  10  -3 -35 121.672 123.165   3
  -7  10 -35-68.7112 90.0700   2
  10  -3 -35 146.089 130.027   2
  10  -3 -38 425.948 146.986   3
  10  -3 -41 518.873 154.107   3
   4   6 -38 8.80924 101.087   3
   6 -10 -38 327.798 161.548   3
   4   6 -38 372.761 134.570   2
   6 -10 -35 926.014 177.551   3
   4   6 -35 969.736 135.525   3
   6 -10 -32 1081.33 174.558   3
   4   6 -32 1106.66 135.276   3
  10  -4  32 1109.92 150.276   3
   4   6 -29 4133.41 163.804   1
   4   6 -29 3069.71 204.360   3
   6 -10 -29 3784.25 258.475   2
  10  -4  29 2809.19 210.908   3
   6 -10 -29 4323.02 282.051   3
   6 -10 -26 6441.14 236.816   1
   6 -10 -26 5845.05 314.738   2
  10  -4  26 5475.21 280.234   3
   4   6 -26 6374.86 231.698   1
   6 -10 -26 5604.63 335.004   3
   6 -10 -23 1723.05 165.236   2
  10  -4  23 1902.22 154.646   3
   6 -10 -23 2182.39 124.598   1
   4   6 -23 2161.37 118.974   1
   6 -10 -20 540.433 105.683   2
   4   6 -20 499.352 68.3462   1
   6 -10 -20 614.499 75.4712   1
  10  -4  20 543.019 75.0383   2
   4   6 -17 15298.0 494.358   1
   6 -10 -17 16660.6 555.439   2
   6 -10 -17 15301.7 582.365   3
  10  -4  17 16181.2 493.614   2
   6 -10 -17 15366.9 500.560   1
   6 -10 -14 16587.1 594.637   3
   4   6 -14 16882.9 530.384   1
  10  -4  14 16495.9 506.381   2
   6 -10 -14 17092.1 566.246   2
   6 -10 -14 17262.1 534.320   1
   6 -10 -11 21831.0 723.320   3
   6 -10 -11 22538.9 675.742   1
  -6  10  11 21735.5 688.925   2
   4   6 -11 22504.3 677.903   1
   6 -10  -8 178720. 4677.41   1
  -6  10   8 173347. 4676.43   2
   4   6  -8 173185. 4678.36   1
   6 -10  -8 173805. 4718.78   3
   6 -10  -5 150930. 4082.69   3
  -6  10   5 151608. 4046.57   2
  -6  10   2 155999. 4259.59   1
  -6  10   2 161382. 4227.27   2
   6 -10  -2 157902. 4260.03   3
   6 -10   1 250025. 6902.11   3
   4   6   1 255058. 6931.38   1
  -6  10  -1 267415. 6932.05   1
  -6  10  -1 260968. 6876.72   2
   6 -10   1 272112. 6925.57   1
   6 -10   4 148496. 4037.17   3
   6 -10   4 159041. 4077.87   1
   4   6   4 149802. 4088.78   1
   6 -10   7 141012. 3636.96   1
   4   6   7 136012. 3655.52   1
   6 -10   7 132170. 3574.66   3
   6 -10  10 46488.8 1265.44   1
   4   6  10 41971.9 1283.97   1
   4   6  13 11311.6 429.370   1
   4   6  13 12595.5 474.268   3
   6 -10  13 12470.3 410.821   1
   4   6  16 7854.68 355.721   3
   4   6  16 7343.93 311.958   1
   4   6  16 7976.30 327.625   2
   6 -10  16 8100.27 295.940   1
   4   6  19 1351.80 132.454   2
   4   6  19 1332.56 119.428   1
   6 -10  19 1474.23 108.553   1
   4   6  19 1277.16 152.141   3
   4   6  22 15052.0 576.521   3
   4   6  22 14088.5 475.028   1
   6 -10  22 14654.7 465.079   1
  -6  10 -22 13534.8 446.296   2
   4   6  22 14585.8 523.094   2
   4   6  25 7956.03 389.913   3
   6 -10  25 7825.42 291.183   1
   4   6  25 8161.91 358.807   2
   4   6  25 7459.50 287.177   1
  -6  10 -25 7556.90 285.870   2
   4   6  28 1829.62 206.223   3
   6 -10  28 1664.15 117.361   1
  10  -4 -28 1671.35 199.179   3
   4   6  28 1550.08 110.636   1
  -6  10 -28 1696.34 129.502   2
   4   6  28 1668.55 173.687   2
  10  -4 -31 1173.59 176.968   3
   4   6  31 1132.73 80.8031   1
  -6  10 -31 1283.63 118.915   2
  10  -4 -31 1031.95 77.5897   1
  10  -4 -34 1125.59 180.258   3
  -6  10 -34 989.854 118.339   2
  -6  10 -37 463.332 113.746   2
  10  -4 -37 466.984 155.210   3
  10  -4 -37 456.308 157.065   2
  10  -4 -40 398.678 165.725   3
  -6  10 -40 359.441 109.722   2
   5   5 -39 50.8478 107.108   3
   5   5 -39 201.315 130.463   2
   5   5 -36 309.703 106.254   3
   5 -10 -36 27.9708 132.464   3
   5   5 -33 277.647 97.4345   3
  10  -5  33 335.423 102.593   3
   5 -10 -33 249.035 143.109   3
   5   5 -33 347.618 48.2313   1
  10  -5  30-103.697 91.7281   3
   5   5 -30-8.07378 49.5093   1
   5   5 -30-133.477 101.221   3
   5 -10 -30-59.4168 108.856   3
  10  -5  30-4.31362 48.6168   1
  10  -5  27 99.8312 77.3897   3
   5   5 -27 260.301 54.2821   1
  10  -5  27 337.705 60.2717   1
   5 -10 -27 354.755 117.789   3
   5   5 -24 947.354 77.0925   1
  10  -5  24 706.384 100.146   3
   5 -10 -24 884.098 81.0969   1
   5 -10 -21 2022.63 123.056   1
  10  -5  21 1931.41 143.694   3
   5   5 -21 1986.49 115.037   1
   5 -10 -18 5988.77 233.903   1
  10  -5  18 5597.43 219.111   2
   5   5 -18 5594.14 223.175   1
   5 -10 -18 5481.47 294.482   3
   5 -10 -15 8759.34 378.937   3
   5 -10 -15 9063.45 325.354   1
  10  -5  15 9096.86 297.131   2
   5   5 -15 9123.69 319.198   1
   5 -10 -12 4713.16 245.084   3
  10  -5  12 4722.56 171.301   2
  -5  10  12 4740.85 205.052   1
  -5  10  12 4778.98 220.735   2
   5 -10 -12 4983.49 208.764   1
   5   5 -12 4478.68 198.839   1
   5 -10  -9 521.621 68.1121   1
  -5  10   9 482.325 67.2166   1
  -5  10   9 510.455 71.7074   2
   5 -10  -9 516.277 85.0132   3
  -5  10   6 3757.57 166.096   2
   5 -10  -6 3068.38 177.109   3
  -5  10   6 3413.74 168.661   1
  -5  10   6 3404.75 187.620   3
   5 -10  -6 3518.50 167.822   1
  -5  10   3 8192.54 286.271   2
   5 -10  -3 8025.87 305.171   3
  -5  10   3 8688.56 310.137   1
   5 -10   0 21795.9 668.475   3
   5 -10   0 22822.3 682.675   1
  -5  10   0 22844.7 688.617   1
   5 -10   3 46611.0 1328.86   3
   5 -10   3 50940.0 1366.18   1
   5 -10   6 69237.4 1912.02   1
   5 -10   9 64037.3 1724.92   1
  -5  10  -9 60003.9 1724.50   1
  -5  10 -12 7823.26 299.494   1
   5 -10  12 8564.33 306.472   1
   5 -10  15 3169.48 158.366   1
   5   5  15 2987.35 198.292   3
   5   5  15 2729.69 169.743   1
   5   5  18 48.4981 63.0848   1
   5   5  18 65.2608 66.7268   2
   5 -10  18 102.083 54.0286   1
   5   5  18 36.6358 81.3344   3
   5   5  21 2263.92 154.738   1
   5 -10  21 2746.09 148.594   1
   5   5  21 2740.85 180.431   2
   5   5  21 2731.90 204.537   3
   5   5  24 300.377 111.854   3
   5 -10  24 292.786 66.6234   1
  10  -5 -24 256.740 110.474   3
   5   5  24 208.786 62.0346   1
   5   5  24 517.505 95.9006   2
  -5  10 -27 657.685 85.9974   2
   5 -10  27 589.134 81.9341   1
   5   5  27 587.892 76.9405   1
   5   5  27 816.664 142.317   3
  10  -5 -27 388.668 137.687   3
   5   5  27 676.491 115.102   2
  10  -5 -27 525.624 127.902   2
   5   5  30 674.605 145.118   3
  10  -5 -30 595.837 67.9920   1
  10  -5 -30 558.578 149.823   3
   5   5  30 572.753 67.8444   1
   5   5  30 709.012 126.673   2
  -5  10 -30 676.684 94.7043   2
  10  -5 -33 2320.03 227.735   3
  10  -5 -33 2204.95 94.0750   1
  -5  10 -33 2382.31 163.769   2
  10  -5 -36 404.408 158.128   3
  -5  10 -36 566.950 104.748   2
  10  -5 -36 473.770 153.323   2
  10  -5 -39-79.4069 148.629   3
  -5  10 -39 95.8271 90.1185   2
   6   4 -40-132.010 105.164   3
   6   4 -37-39.8362 95.8699   3
   4 -10 -34 629.996 153.370   3
   6   4 -34 761.939 46.8633   1
   6   4 -34 950.031 129.325   3
   6   4 -31 1581.77 150.595   3
  10  -6  31 1365.22 90.5654   1
   6   4 -31 1224.81 80.8543   1
   4 -10 -31 1367.73 179.905   3
  10  -6  31 1238.34 125.879   3
  10  -6  28 42.4349 63.9864   3
  10  -6  28 29.9892 45.8823   1
   6   4 -28 28.1891 43.8019   1
   4 -10 -28 23.8867 96.9760   3
   6   4 -25 929.316 80.0639   1
  10  -6  25 809.721 104.225   3
   4 -10 -25 968.948 149.465   3
  10  -6  25 1027.22 91.8202   1
   6   4 -22 1894.12 113.151   1
   4 -10 -22 1998.60 122.525   1
  10  -6  22 1759.78 132.535   3
   4 -10 -19 3011.85 154.479   1
   6   4 -19 2849.89 145.970   1
   4 -10 -16 5988.13 302.198   3
  -4  10  16 6769.16 324.191   3
  -4  10  16 5912.87 242.845   1
   4 -10 -16 6338.42 250.929   1
  -4  10  13 2666.27 147.098   1
   4 -10 -13 2558.83 145.944   1
  10  -6  13 2939.70 113.876   2
   4 -10 -13 2736.32 185.494   3
  -4  10  10 2973.95 154.347   1
   4 -10 -10 2878.56 150.929   1
  -4  10  10 2735.76 157.213   2
   4 -10 -10 2832.98 176.217   3
  -4  10   7 20466.0 652.726   1
  -4  10   7 20946.7 648.270   2
   4 -10  -7 20348.0 671.260   3
   4 -10  -7 21272.6 648.442   1
  -4  10   4 16796.6 527.631   2
  -4  10   4 16806.2 544.185   1
   4 -10  -4 16314.5 545.134   3
   4 -10  -1 11020.3 387.340   3
  -4  10   1 11532.4 403.446   1
   4 -10  -1 11877.2 400.248   1
  -4  10  -2 11281.0 411.765   1
   4 -10   2 12159.0 411.563   1
  -4  10  -5 7837.61 266.631   3
   4 -10   5 8158.86 299.490   1
  -4  10  -8 13019.3 452.457   1
   4 -10   8 14299.3 455.336   1
  -4  10 -11 6086.34 249.775   1
   4 -10  11 6238.99 250.671   1
  -4  10 -14 9289.65 344.782   1
   4 -10  14 10128.5 349.947   1
  -4  10 -17 13865.8 467.654   1
   4 -10  17 14681.9 472.184   1
   6   4  17 14431.7 504.946   2
   6   4  17 14357.2 534.580   3
   4 -10  20 5501.72 232.380   1
   6   4  20 5567.54 266.464   2
   6   4  20 5907.66 302.958   3
   4 -10  23 6595.79 262.971   1
  10  -6 -23 6528.60 351.254   3
   6   4  23 5932.48 265.344   1
   6   4  23 7193.57 311.952   2
  10  -6 -23 5853.21 319.404   2
   6   4  23 7029.39 344.992   3
  10  -6 -26 3553.47 257.889   3
   6   4  26 3045.06 167.930   1
  10  -6 -26 3254.59 161.555   1
   6   4  26 4003.81 233.873   2
  10  -6 -26 3508.30 245.518   2
   6   4  26 3670.60 251.130   3
   6   4  29 829.055 154.958   3
  10  -6 -29 449.524 149.227   3
  10  -6 -29 636.657 139.441   2
  10  -6 -29 407.350 67.0877   1
  -4  10 -29 758.775 102.452   2
   6   4  29 502.531 123.494   2
   6   4  29 483.085 73.5647   1
  -4  10 -32 383.644 87.6542   2
   6   4  32 273.225 53.2064   1
   6   4  32 540.116 145.234   3
  10  -6 -32 396.754 52.9301   1
  10  -6 -32 135.649 129.933   3
  10  -6 -35-78.5221 145.732   3
  -4  10 -35 185.731 91.4548   2
  10  -6 -38-8.97842 151.262   3
  -4  10 -38 138.938 94.2652   2
  -4  10 -41-71.6708 108.691   2
   7   3 -35-131.097 106.403   3
   7   3 -32 1012.28 143.544   3
   7   3 -29 409.193 59.0331   1
  10  -7  29 366.566 62.5472   1
  10  -7  29 232.125 73.8032   3
   3 -10 -29 466.305 131.687   3
   7   3 -29 150.052 107.310   3
  10  -7  26 30.6550 48.7773   1
   7   3 -26 13.9216 45.1654   1
  10  -7  26 10.5054 55.0004   3
   3 -10 -26-38.2347 96.1222   3
  -3  10  23 1200.15 144.872   2
  -3  10  23 1546.06 175.924   3
   7   3 -23 1495.62 103.216   1
  10  -7  23 1375.23 111.797   1
  10  -7  23 1312.69 108.235   3
   3 -10 -20 8412.80 304.939   1
  10  -7  20 7750.92 295.396   3
  -3  10  20 7646.83 295.974   1
  -3  10  20 8050.26 350.803   2
  -3  10  17 21003.3 705.909   3
   3 -10 -17 19213.5 683.996   3
  -3  10  17 18720.8 605.088   1
   3 -10 -17 20114.2 614.555   1
  -3  10  14 30399.9 929.628   1
   3 -10 -14 32496.6 998.720   3
   3 -10 -14 32770.6 935.027   1
   3 -10 -11 40534.5 1135.79   1
   3 -10 -11 36951.3 1176.28   3
  -3  10  11 37394.9 1130.33   1
  10  -7  11 39938.0 1054.25   2
   3 -10  -8 22921.5 678.844   1
  -3  10   8 21934.9 681.219   2
  -3  10   8 21446.8 678.178   1
   3 -10  -8 21449.3 702.965   3
  -3  10   5 12175.8 421.947   3
   3 -10  -5 10799.6 397.332   3
  -3  10   5 11136.8 396.364   1
  -3  10   2 12742.0 427.235   3
  -3  10   2 11600.8 416.143   1
  -3  10  -1 22855.8 672.163   3
   3 -10   1 21713.3 675.130   1
  -3  10  -1 21348.7 679.695   1
  -3  10  -4 48142.9 1321.59   3
   3 -10   4 46613.2 1346.44   1
  -3  10  -7 87648.0 2298.90   3
  -3  10  -7 82409.1 2349.23   1
   3 -10   7 84795.3 2346.75   1
   3 -10  10 68865.1 1868.63   1
  -3  10 -10 65507.8 1865.90   1
  -3  10 -13 41751.3 1202.17   1
   3 -10  13 42149.4 1202.97   1
   3 -10  16 38402.5 1100.37   1
  -3  10 -16 37641.8 1097.71   1
  -3  10 -19 8035.83 302.775   1
   7   3  19 8318.84 337.189   2
   3 -10  19 8070.10 309.416   1
   7   3  19 7896.21 363.002   3
  10  -7 -19 7823.92 353.692   2
  10  -7 -22 3527.23 178.076   1
   7   3  22 4166.14 258.554   3
  10  -7 -22 3594.89 263.005   3
   7   3  22 4620.80 233.261   2
   7   3  22 3505.78 202.151   1
  10  -7 -22 4080.76 250.856   2
   3 -10  22 3860.92 193.294   1
  10  -7 -25 2567.75 226.177   3
   7   3  25 2892.55 195.277   2
   7   3  25 2061.16 145.910   1
  10  -7 -25 2174.85 134.148   1
  10  -7 -25 2126.17 196.825   2
   7   3  25 2460.14 218.202   3
   7   3  28 1406.99 183.680   3
  10  -7 -28 1653.60 196.691   3
   7   3  28 1107.84 106.196   1
   7   3  28 1610.86 168.818   2
  10  -7 -28 1610.62 187.333   2
  10  -7 -28 1411.67 101.724   1
   7   3  31 911.580 167.871   3
   7   3  31 831.148 78.4051   1
  10  -7 -31 1030.44 167.949   2
  -3  10 -31 1056.50 122.581   2
  10  -7 -31 1045.93 181.592   3
  10  -7 -31 1012.05 75.7072   1
  10  -7 -34 43.8670 138.697   3
  10  -7 -34 24.6986 28.1452   1
  -3  10 -34 241.634 98.2147   2
  -3  10 -37 90.7244 93.9130   2
  10  -7 -37 27.3595 135.056   3
  10  -7 -40 205.148 146.458   3
  -3  10 -40-78.8577 109.173   2
   8   2 -39 341.195 119.454   3
   8   2 -36 27.2783 106.760   3
   8   2 -33-151.063 121.778   3
  10  -8  30 2.48642 56.8512   1
   8   2 -30 105.579 47.3862   1
   8   2 -27 700.731 71.7711   1
  10  -8  27 594.003 78.3462   3
  10  -8  27 623.641 75.5416   1
  -2  10  27 718.537 146.979   3
  -2  10  24 663.517 81.4135   1
  10  -8  24 835.706 80.5065   3
  10  -8  24 802.911 85.0727   1
  -2  10  24 849.748 124.711   2
  -2  10  24 955.543 149.353   3
  10  -8  21 662.613 70.9965   3
  -2  10  21 704.477 110.353   2
  10  -8  21 612.064 84.3449   1
  -2  10  21 532.369 74.6631   1
  -2  10  21 618.056 124.579   3
   2 -10 -18-88.2373 91.9486   3
  -2  10  18-74.5099 97.3103   3
  -2  10  18 65.5713 45.2275   1
  -2  10  18-70.9625 82.9263   2
   2 -10 -18-59.9583 65.1178   1
  -2  10  15 92.2348 73.3217   3
   2 -10 -15 100.652 54.7953   1
  -2  10  15 200.166 58.0695   1
   2 -10 -15 109.179 79.3319   3
   2 -10 -12 4124.12 192.620   1
  -2  10  12 3657.47 187.650   1
   2 -10  -9 8567.24 314.021   1
  -2  10   9 7701.85 310.025   1
  -2  10   6 24881.3 758.210   3
   2 -10  -6 23036.3 725.139   1
  -2  10   6 23531.0 733.548   1
  -2  10   3 10825.7 392.839   3
  -2  10   3 10700.8 387.580   1
   2 -10   0 2666.89 150.892   1
  -2  10   0 2586.43 152.966   1
  -2  10   0 2887.26 153.334   3
   2 -10   3 650.444 77.8517   1
  -2  10  -3 743.368 71.0547   3
   2 -10   6 628.055 77.9739   1
  -2  10  -6 616.329 62.2189   3
  -2  10  -9 468.503 73.2681   1
   2 -10   9 602.548 76.8447   1
  -2  10  -9 688.077 55.1439   3
   2 -10  12 12305.9 423.087   1
  10  -8 -12 12480.0 438.340   2
  -2  10 -12 11814.9 418.861   1
  -2  10 -15 16506.7 538.637   1
   2 -10  15 16476.1 543.903   1
  10  -8 -15 17329.4 578.485   2
  -2  10 -18 11390.6 403.903   1
   2 -10  18 12313.5 421.939   1
   8   2  18 11699.4 429.606   2
  10  -8 -18 11951.5 456.741   2
  10  -8 -21 4296.65 199.875   1
   8   2  21 4558.66 239.751   2
  10  -8 -21 4564.49 260.882   2
   8   2  21 4731.35 270.033   3
  -2  10 -21 4470.91 206.634   1
   8   2  24 1335.89 147.941   2
   8   2  24 1454.95 180.060   3
  10  -8 -24 1345.38 161.875   2
  10  -8 -24 1234.49 108.242   1
  -2  10 -24 1459.59 111.622   1
  10  -8 -24 1343.95 177.966   3
   8   2  27-130.612 140.942   3
   8   2  27 35.1624 67.4166   1
  10  -8 -27 65.6759 106.815   3
  10  -8 -27-41.9860 95.2845   2
   8   2  27-48.3282 94.2312   2
  10  -8 -27 12.4992 55.0701   1
  10  -8 -30 1273.09 173.982   3
   8   2  30 830.639 86.4710   1
   8   2  30 1007.98 143.899   2
  10  -8 -30 1185.53 166.353   2
  10  -8 -30 1230.33 83.6418   1
   8   2  30 946.861 156.943   3
   8   2  33 280.141 135.449   3
  -2  10 -33 286.657 93.8742   2
  10  -8 -33 324.408 127.643   2
  10  -8 -33 281.856 132.113   3
  10  -8 -33 327.828 49.7584   1
  10  -8 -36 37.1817 129.903   3
  -2  10 -36 243.177 102.786   2
  10  -8 -39 142.347 121.696   3
  -2  10 -39-86.4780 113.643   2
  -2  10 -42-236.628 135.786   2
   9   1 -40-102.858 147.527   3
   9   1 -37 821.581 163.820   3
   9   1 -34-170.103 132.269   3
   9   1 -34-8.87066 44.9064   1
   9   1 -31 6.89202 118.106   3
  10  -9  31 104.992 58.6203   1
   9   1 -31 175.268 54.0102   1
   9   1 -28 353.337 63.2166   1
  -1  10  28 195.283 127.241   3
  10  -9  28 238.321 67.6623   1
  10  -9  25 137.891 58.5002   1
  10  -9  25-8.92496 48.6811   3
  -1  10  25 172.999 115.547   3
  -1  10  25 75.2608 81.2251   2
  -1  10  25 51.7051 47.7903   1
  -1  10  22 1229.55 164.936   3
  -1  10  22 1275.14 104.871   1
  10  -9  22 1325.10 107.065   1
  10  -9  22 1079.36 81.0348   3
  -1  10  22 1398.63 141.130   2
  -1  10  19 8995.06 414.090   3
  -1  10  19 8810.33 366.271   2
  10  -9  19 7885.50 278.602   3
  -1  10  19 8563.37 322.022   1
  10  -9  19 9298.52 324.876   1
  -1  10  16 6396.46 316.914   3
  -1  10  16 5001.51 237.928   1
  -1  10  16 5471.10 266.401   2
  10  -9  16 5872.59 242.876   1
   1 -10 -13 4644.16 216.594   1
  -1  10  13 4450.81 216.766   1
  -1  10  10 2956.49 171.615   1
   1 -10 -10 3144.12 169.694   1
  -1  10   7 5430.09 263.886   3
  -1  10   7 5317.34 246.263   1
   1 -10  -7 5457.25 240.550   1
  -1  10   4 1657.66 128.338   3
  10  -9   4 1659.10 64.4395   2
  -1  10   1 2501.38 155.508   1
  10  -9   1 2521.55 107.428   2
  -1  10   1 2680.72 155.497   3
   1 -10   2 14611.6 486.350   1
  10  -9  -2 14221.2 438.243   2
  -1  10  -2 15354.0 481.254   3
   1 -10   5 26153.4 803.852   1
  -1  10  -5 27174.3 780.635   3
  10  -9  -5 25588.9 771.262   2
   1 -10   8 20702.6 652.665   1
  10  -9  -8 20495.6 637.541   2
  -1  10  -8 20299.5 652.315   1
   1 -10  11 16991.9 554.454   1
  10  -9 -11 17086.5 555.297   2
  -1  10 -11 16268.9 545.443   1
   1 -10  14 294.644 74.2302   1
  10  -9 -14 180.261 67.7111   2
  10  -9 -14 230.920 61.9746   1
  -1  10 -14 195.783 59.5600   1
  10  -9 -17 564.655 121.469   3
   9   1  17 474.491 83.1542   2
  10  -9 -17 479.848 73.5305   1
  -1  10 -17 497.221 78.1781   1
  10  -9 -17 372.700 90.2087   2
  -1  10 -20 77.9009 30.3360   3
  -1  10 -20 209.025 66.5119   1
   9   1  20-12.9411 93.1392   2
  10  -9 -20 56.9196 53.3105   1
   9   1  20 35.9971 98.4683   3
  10  -9 -20 149.056 83.6613   2
   9   1  23 1285.66 161.642   3
  10  -9 -23 1575.10 162.193   2
   9   1  23 1145.38 129.177   2
  -1  10 -23 1434.06 113.912   1
  10  -9 -23 1483.19 107.485   1
  -1  10 -23 1222.37 60.4668   3
   9   1  26-90.0474 118.002   3
  10  -9 -26 61.8351 93.5562   2
  10  -9 -26 24.7906 56.7245   1
   9   1  26-61.1212 106.665   2
  10  -9 -26 33.1738 102.642   3
  -1  10 -26 94.6640 54.4372   1
   9   1  29 2056.73 196.884   3
  10  -9 -29 2383.60 223.526   3
  10  -9 -29 2164.08 197.648   2
   9   1  29 2014.85 132.502   1
   9   1  29 2069.58 175.236   2
  10  -9 -29 2194.91 119.264   1
  10  -9 -32 1711.68 93.5739   1
  10  -9 -32 1513.06 177.208   2
  10  -9 -32 1444.44 194.497   3
   9   1  32 1295.88 95.3125   1
   9   1  32 1531.55 188.335   3
  10  -9 -35 480.543 152.053   3
  -1  10 -35 195.883 100.869   2
  10  -9 -35 468.715 144.627   2
  -1  10 -38 426.505 117.974   2
  10  -9 -38 329.282 149.445   3
  -1  10 -41-147.908 121.291   2
  10   0 -41-196.061 148.125   3
  10   0 -38-125.615 150.561   3
  10   0 -35-137.469 139.192   3
  10   0 -35-47.4829 50.3683   1
  10   0 -32-18.7325 58.7193   1
  10   0 -32-37.3743 118.167   3
   0  10  29 3007.88 155.622   1
  10 -10  29 3226.77 163.992   1
   0  10  26 1582.88 189.109   3
   0  10  26 1208.07 104.256   1
  10 -10  26 1418.44 112.232   1
   0  10  26 1439.49 153.726   2
   0  10  23 306.842 114.438   3
   0  10  23 239.018 97.8173   2
   0  10  23 271.616 63.6316   1
  10 -10  23 352.135 68.3924   1
  10 -10  20 1213.70 68.7943   3
  10 -10  20 1359.10 114.479   1
   0  10  20 1437.38 144.144   2
   0  10  20 1359.33 167.399   3
   0  10  20 1224.64 114.015   1
   0  10  17 227.795 92.8795   3
  10 -10  17 156.447 66.2136   1
   0  10  17 225.911 70.3924   1
   0  10  17 124.761 76.8376   2
  10 -10  14 5351.02 229.580   1
   0  10  14 4798.81 245.709   2
   0  10  14 4814.94 274.200   3
   0  10  14 4634.21 234.192   1
  10 -10  11 6441.28 269.099   1
   0  10  11 6508.13 285.426   1
   0  10   8 274.327 73.3244   1
  10 -10   8 321.392 69.0630   1
   0  10   5 7802.84 324.337   1
   0  10   5 8076.77 337.006   3
   0  10   2 35430.8 1089.17   1
   0  10   2 37621.5 1095.00   3
  10 -10  -1 49636.2 1371.97   2
   0  10  -1 48732.1 1444.21   1
   0  10  -1 52278.7 1439.95   3
   0 -10   1 50168.8 1439.53   1
  10 -10  -4 22452.9 672.911   2
   0 -10   4 23218.9 722.404   1
  10 -10  -7 1754.92 127.479   1
   0 -10   7 2001.01 139.787   1
  10 -10  -7 2006.46 124.614   2
   0  10  -7 1945.51 137.566   1
  10 -10 -10 2197.56 138.900   1
   0  10 -10 2301.79 146.892   1
  10 -10 -10 1974.69 136.488   2
  10 -10 -13 1392.18 112.279   1
  10 -10 -13 1327.03 122.915   2
  10 -10 -13 1275.62 149.374   3
   0  10 -13 1441.08 116.324   1
  10 -10 -16 4191.39 265.310   3
  10 -10 -16 4507.81 207.309   1
   0  10 -16 4627.24 214.193   1
  10 -10 -16 4531.94 240.226   2
  10   0  19-16.2217 64.3201   2
   0  10 -19-34.6877 66.9465   1
  10 -10 -19-44.6882 85.4127   2
  10 -10 -19-20.1429 62.7985   1
   0  10 -22 4152.71 159.738   3
  10   0  22 3741.23 211.461   2
  10 -10 -22 4289.77 253.197   2
   0  10 -22 4500.74 205.021   1
  10 -10 -22 4382.02 198.308   1
  10   0  22 4167.14 257.532   3
  10   0  25 996.266 141.474   3
   0  10 -25 793.659 60.9420   3
  10 -10 -25 898.239 150.672   3
  10 -10 -25 900.960 88.2454   1
  10   0  25 1021.62 117.100   2
  10 -10 -25 780.011 131.713   2
   0  10 -25 857.229 92.3151   1
   0  10 -28 2377.53 137.000   1
  10 -10 -28 2584.84 210.127   2
   0  10 -28 2002.04 96.4280   3
  10   0  28 2453.12 173.432   2
  10 -10 -28 2139.77 126.431   1
  10   0  28 2324.38 205.721   3
  10 -10 -28 2239.40 219.594   3
  10 -10 -31 1372.26 93.7738   1
  10 -10 -31 1313.48 170.489   2
  10 -10 -31 1128.78 183.787   3
  10   0  31 1241.80 170.652   3
  10   0  31 1063.82 101.188   1
  10   0  34-47.8872 114.655   3
  10 -10 -34-11.0907 48.9489   1
  10 -10 -34 92.6901 113.737   2
  10 -10 -34-19.2401 133.810   3
   0  10 -37-109.123 107.275   2
  10 -10 -37-178.596 167.175   3
   0  10 -40 50.0426 104.479   2
   1  10 -39-65.3142 111.588   2
  10 -11 -36-258.200 183.291   3
  10 -11 -33-108.370 68.4944   1
   1  10 -33-69.2371 50.3569   3
  10 -11 -33-9.64511 144.919   3
  10 -11 -33 108.528 119.943   2
  11  -1  33-97.9107 128.674   3
  10 -11 -30 183.731 128.989   3
  10 -11 -30 217.811 117.035   2
   1  10 -30 188.603 68.1177   1
  10 -11 -30 216.144 65.8787   1
  11  -1  30 204.812 113.542   3
   1  10 -30 302.550 54.7636   3
  11  -1  27-124.475 128.756   3
  11  -1  27-19.5634 91.0661   2
   1  10 -27-6.41109 72.3631   1
  10 -11 -27 8.61154 121.767   3
  10 -11 -27 36.3161 111.059   2
  10 -11 -27-39.1949 68.3848   1
   1  10 -27-79.3094 64.9233   3
   1  10 -24 301.926 57.6594   3
  10 -11 -24 264.433 76.3182   1
  11  -1  24 248.588 89.7467   2
  10 -11 -24 212.333 116.659   2
   1  10 -24 242.680 77.4844   1
  11  -1  24 337.819 115.706   3
   1  10 -21 609.640 86.5739   1
  11  -1  21 455.060 89.0095   2
  10 -11 -21 601.217 116.372   2
  10 -11 -21 503.451 84.9284   1
  10 -11 -18 14026.7 515.456   2
   1  10 -18 14299.2 470.974   1
  11  -1  18 13258.3 468.811   2
  10 -11 -18 13859.5 560.174   3
  10 -11 -18 13536.7 464.835   1
  10 -11 -15 31010.2 1043.12   3
  10 -11 -15 32561.9 996.357   2
   1  10 -15 33139.6 967.702   1
  10 -11 -15 32178.7 963.093   1
  10 -11 -12 31532.2 934.270   1
  10 -11 -12 30018.3 1000.69   3
  10 -11 -12 30801.2 946.153   2
   1  10 -12 32017.5 941.426   1
  10 -11  -9 22600.5 782.364   3
  10 -11  -9 23346.8 726.191   2
   1  10  -9 24474.8 744.042   1
  10 -11  -9 23495.4 731.356   1
  10 -11  -6 1015.77 96.8630   1
  10 -11  -6 877.075 83.9337   2
  10 -11  -3 17989.5 545.271   2
   1  10   0 11046.6 424.973   1
  10 -11   0 11843.1 410.905   1
  10 -11   3 3536.93 181.762   1
   1  10   3 3172.60 190.630   1
   1  10   3 3272.03 198.419   3
  10 -11   6 307.546 70.0928   1
   1  10   6 197.824 80.9822   3
   1  10   6 365.500 76.1722   1
   1  10   9 25351.5 797.201   1
  10 -11   9 24465.0 763.557   1
   1  10  12 24477.2 792.474   1
  10 -11  12 25386.3 771.378   1
   1  10  15 25788.8 855.955   3
  10 -11  15 24474.3 762.071   1
   1  10  15 25505.8 803.488   2
   1  10  15 23835.9 783.939   1
   1  10  18 8969.15 409.845   3
   1  10  18 8209.70 339.604   1
   1  10  18 8550.50 369.960   2
  10 -11  18 8540.22 330.100   1
   1  10  21 482.187 127.757   3
   1  10  21 522.856 89.0166   1
   1  10  21 413.212 107.740   2
  10 -11  21 695.634 92.5577   1
  10 -11  24 1132.83 107.224   1
   1  10  24 952.750 101.168   1
   1  10  24 1181.65 146.094   2
   1  10  24 1320.01 180.460   3
   1  10  27 2042.93 138.580   1
   1  10  27 2381.04 199.266   2
   1  10  27 2506.30 238.671   3
  10 -11  27 2672.35 152.101   1
  10 -11  30-34.8964 70.8149   1
   1  10  30-35.4867 57.9360   1
  11  -1 -33-40.7232 77.7675   1
  11  -1 -33 16.1436 114.132   3
  11  -1 -36-114.727 125.765   3
  11  -1 -39-108.679 140.854   3
   2   9 -40-75.6865 117.231   2
   9 -11 -34-76.8905 166.441   3
   9 -11 -34 275.305 135.657   2
  11  -2  34 151.946 125.971   3
   2   9 -34-58.9758 68.8372   3
  11  -2  31 20.3814 101.705   3
   2   9 -31-40.9776 66.9630   1
   9 -11 -31 49.0640 55.5807   1
   9 -11 -31 62.6946 109.007   2
   9 -11 -31-82.0809 142.301   3
   2   9 -31-71.1926 79.0551   3
   2   9 -28 149.679 67.6415   3
  11  -2  28 137.343 112.736   3
   9 -11 -28 61.1445 125.563   3
   9 -11 -28 256.377 116.628   2
   2   9 -28 146.556 65.1535   1
   9 -11 -28 232.805 66.0833   1
   2   9 -25 152.447 65.0416   3
   9 -11 -25 67.3639 65.4365   1
  11  -2  25-125.770 107.648   2
   9 -11 -25 255.189 115.053   2
   2   9 -25 110.116 65.6728   1
  11  -2  25 6.31064 100.422   3
   2   9 -22 1062.37 100.630   1
   9 -11 -22 1012.70 97.7214   1
  11  -2  22 1198.25 113.288   2
   9 -11 -22 1108.54 143.256   2
   9 -11 -19 10504.4 462.366   3
  11  -2  19 10149.3 371.539   2
   9 -11 -19 10738.8 428.136   2
   9 -11 -19 10482.8 371.562   1
   2   9 -19 10301.7 368.758   1
   9 -11 -16 25951.1 893.016   3
   9 -11 -16 26909.1 851.816   2
   9 -11 -16 26967.2 809.675   1
   2   9 -16 26961.5 808.323   1
   2   9 -13 23432.6 733.411   1
   9 -11 -13 23545.0 806.138   3
   9 -11 -13 24104.4 756.187   2
   9 -11 -13 24375.9 734.758   1
   9 -11 -10 10939.0 446.410   3
   2   9 -10 11387.3 406.319   1
   9 -11 -10 11397.0 404.881   2
   9 -11 -10 11635.1 403.031   1
   9 -11  -7 4156.89 197.173   1
   2   9  -7 3961.27 199.832   1
   9 -11  -7 3960.17 184.463   2
   9 -11  -7 3713.71 218.080   3
   9 -11  -4 1528.77 95.8638   2
   9 -11  -4 1375.00 123.060   3
   9 -11  -1 5169.23 238.434   3
   2   9  -1 5290.13 244.246   1
   9 -11  -1 5397.27 233.514   1
   9 -11   2 179.118 55.4729   1
   2   9   2 296.414 65.3013   1
   2   9   5 774.611 105.060   3
   2   9   5 821.766 99.3503   1
   9 -11   5 767.729 85.9828   1
   9 -11   8 15226.6 482.842   1
   2   9   8 13082.9 499.236   1
   9 -11  11 37704.1 1068.13   1
   2   9  11 34922.6 1097.08   1
   2   9  14 11785.1 489.351   3
   2   9  14 12218.4 458.370   2
   2   9  14 11851.3 446.312   1
   9 -11  14 12610.6 426.528   1
   9 -11  17 14826.8 489.560   1
   2   9  17 14106.8 507.547   1
   2   9  17 14370.5 532.612   2
   2   9  17 15369.1 579.277   3
   2   9  20 7808.00 379.554   3
   9 -11  20 7921.90 298.970   1
   2   9  20 7045.94 340.245   2
   2   9  20 6861.21 303.404   1
   2   9  23 80.4523 101.140   3
   2   9  23-79.3190 105.387   2
   2   9  23 118.145 64.3997   1
   9 -11  23 63.2084 66.7515   1
   2   9  26 77.5327 122.298   3
   2   9  26 58.1939 58.9614   1
   2   9  26-91.2384 116.734   2
   9 -11  26-3.37218 66.7486   1
   9 -11  29-68.8792 72.7741   1
   2   9  29-35.9721 61.3887   1
  11  -2 -32-24.4424 113.329   3
  11  -2 -35-33.1366 120.855   3
  11  -2 -38-59.1325 133.118   3
  11  -2 -41-42.1477 129.335   3
   3   8 -35 1438.25 121.900   3
   8 -11 -35 1520.67 195.263   2
  11  -3  32 2002.53 187.828   3
   3   8 -32 2035.80 142.518   3
   3   8 -32 1759.35 118.979   1
   8 -11 -32 2454.82 118.561   1
   8 -11 -32 1711.15 220.382   3
   8 -11 -32 2570.99 221.361   2
  11  -3  29 2279.73 188.607   3
   8 -11 -29 2195.85 198.679   2
   3   8 -29 2172.59 145.981   3
   8 -11 -29 2158.76 125.293   1
   3   8 -29 2277.95 131.907   1
   8 -11 -29 1667.70 207.629   3
  11  -3  26 767.885 126.818   3
   3   8 -26 1025.22 95.7830   1
   8 -11 -26 837.610 161.136   3
   8 -11 -26 1105.67 149.358   2
   8 -11 -26 838.095 91.6988   1
   3   8 -23 332.715 69.0403   1
   8 -11 -23 384.127 103.597   2
   8 -11 -23 309.740 68.9857   1
  11  -3  23 349.405 91.7565   3
  11  -3  23 451.447 82.2823   2
   8 -11 -20 760.449 131.170   3
   8 -11 -20 898.815 121.849   2
  11  -3  20 947.157 91.1184   2
   3   8 -20 848.348 89.2363   1
   8 -11 -20 787.481 88.3423   1
   8 -11 -17 392.149 101.079   3
   8 -11 -17 497.450 78.4212   1
   8 -11 -17 455.982 93.3580   2
  11  -3  17 619.799 72.5173   2
   3   8 -17 477.909 74.0058   1
   8 -11 -14 2143.73 179.887   3
   3   8 -14 2424.33 144.505   1
   8 -11 -14 2280.61 156.621   2
   8 -11 -14 2351.69 142.606   1
   8 -11 -11 12121.4 476.154   3
   3   8 -11 12888.2 432.359   1
   8 -11 -11 12577.5 437.803   2
   8 -11 -11 12278.7 426.644   1
   3   8  -8 54202.3 1506.35   1
   8 -11  -8 53328.6 1495.22   2
   8 -11  -8 51927.1 1543.77   3
   8 -11  -8 52762.2 1500.31   1
   8 -11  -5 74307.6 2086.77   3
   8 -11  -2 34348.9 1013.63   3
  -8  11   2 34109.6 964.169   2
   3   8   1 302.634 69.7857   1
   8 -11   1 309.612 56.2131   3
   8 -11   1 271.952 58.8308   1
  -8  11  -1 359.032 43.9743   2
   8 -11   4 283.096 48.2853   3
   3   8   4 358.975 68.4003   1
   8 -11   4 240.091 55.1582   1
   3   8   7 20209.0 664.387   1
   8 -11   7 20177.6 590.279   3
   8 -11   7 20583.3 637.221   1
   3   8  10 5781.74 270.357   1
   8 -11  10 6485.60 253.784   1
   8 -11  10 5737.81 189.450   3
   3   8  13 18599.3 600.583   1
   8 -11  13 19519.7 570.546   1
   3   8  16 23712.5 754.648   1
   8 -11  16 25265.4 732.113   1
  -8  11 -16 22796.9 649.013   2
   3   8  16 25317.8 822.493   3
   3   8  16 24662.9 774.482   2
   8 -11  19 299.299 73.6005   1
   3   8  19 134.858 92.2561   2
  -8  11 -19 363.180 43.2486   2
   3   8  19 340.576 81.8503   1
   3   8  19 191.214 109.331   3
   8 -11  22-27.6778 72.0576   1
   3   8  22-104.426 136.926   3
   3   8  22-47.0192 72.6181   1
  -8  11 -22-13.2477 44.6458   2
   3   8  22-85.9619 109.880   2
   3   8  25-180.575 142.142   3
   8 -11  25-9.98154 71.9505   1
   3   8  25-46.0669 68.6889   1
  -8  11 -25-2.35693 50.4434   2
   3   8  25-68.4257 107.436   2
   3   8  28-105.432 151.335   3
   8 -11  28-28.5167 64.3875   1
  -8  11 -28-70.1230 69.8973   2
   3   8  28-12.2753 57.5509   1
   3   8  28-158.306 125.360   2
   8 -11  31-14.6782 67.1995   1
  11  -3 -31 32.9595 114.134   3
  -8  11 -31 12.6916 69.3144   2
   3   8  31 15.1008 59.9574   1
  11  -3 -34 131.307 59.6397   1
  11  -3 -34 33.5337 126.402   3
  11  -3 -34-69.6851 59.2838   1
  11  -3 -37 428.160 154.178   3
  11  -3 -40 318.659 155.264   3
   4   7 -36 1803.03 151.590   3
   7 -11 -36 1240.72 225.940   3
   4   7 -33 4220.23 228.881   3
   7 -11 -33 4303.21 328.482   3
  11  -4  33 3969.13 259.074   3
   4   7 -30 5913.39 276.884   3
   4   7 -30 6201.76 233.459   1
   7 -11 -30 5849.43 360.750   3
   7 -11 -30 6315.53 342.677   2
  11  -4  30 5342.42 293.935   3
   7 -11 -30 6098.02 230.870   1
   4   7 -27 9665.04 327.721   1
   7 -11 -27 8798.25 445.858   3
   7 -11 -27 9229.05 329.511   1
   7 -11 -27 9867.44 427.792   2
  11  -4  27 8798.50 386.139   3
   4   7 -24 4574.75 198.669   1
   7 -11 -24 5110.25 277.934   2
   7 -11 -24 4524.73 202.855   1
  11  -4  24 4398.20 245.279   3
   4   7 -21 4909.94 210.357   1
   7 -11 -21 5154.32 274.438   2
   7 -11 -21 4842.94 216.985   1
  11  -4  21 5108.06 220.500   2
   7 -11 -18 8801.73 419.474   3
  11  -4  18 9873.00 337.800   2
   7 -11 -18 10366.6 399.947   2
   7 -11 -18 9493.39 348.990   1
   4   7 -18 9771.11 343.210   1
  11  -4  15 23300.0 687.166   2
   4   7 -15 23386.2 707.403   1
   7 -11 -15 23913.6 750.626   2
   7 -11 -15 22567.7 781.602   3
   7 -11 -15 23189.5 712.055   1
   7 -11 -12 55041.4 1557.87   1
   7 -11 -12 54952.7 1619.41   3
   4   7 -12 56082.4 1557.63   1
   4   7  -9 112908. 3028.01   1
   7 -11  -9 111772. 3026.37   1
   7 -11  -9 110373. 3073.99   3
  -7  11   9 110376. 3027.73   2
   7 -11  -6 166756. 4534.88   3
   7 -11  -6 171047. 4506.14   1
  -7  11   6 165961. 4487.03   2
   7 -11  -3 146540. 3963.67   3
  -7  11   3 146983. 3921.42   2
   4   7   0 198869. 5482.32   1
   7 -11   0 200303. 5461.31   3
   7 -11   0 213514. 5475.82   1
  -7  11   0 205972. 5425.10   2
   4   7   3 216192. 5762.49   1
  -7  11  -3 214100. 5683.31   2
   7 -11   3 209856. 5713.25   3
   7 -11   3 224423. 5747.82   1
   7 -11   6 78396.9 2146.92   3
   7 -11   6 81464.0 2200.30   1
   4   7   6 80756.4 2222.06   1
   4   7   9 92175.2 2459.23   1
   7 -11   9 86062.9 2351.14   3
   7 -11   9 93414.9 2430.56   1
   7 -11  12 73077.2 1966.52   1
   4   7  12 67488.9 1987.49   1
   4   7  12 71392.6 2035.71   3
   7 -11  15 33116.5 943.489   1
   4   7  15 32606.0 1025.06   3
   4   7  18 32299.0 1000.67   1
   7 -11  18 33503.6 975.371   1
   4   7  18 32516.9 1025.27   2
   4   7  18 34490.1 1074.72   3
   4   7  21 11779.8 496.507   3
   4   7  21 11068.8 414.138   1
   4   7  21 11961.7 457.863   2
   7 -11  21 12628.0 407.456   1
  -7  11 -21 10696.9 359.887   2
   4   7  24 6826.66 364.650   3
   7 -11  24 6794.67 265.505   1
  -7  11 -24 5961.63 239.096   2
   4   7  24 6790.72 325.218   2
   4   7  24 6558.98 270.996   1
   4   7  27 1392.80 197.553   3
   7 -11  27 1814.97 124.952   1
   4   7  27 1406.37 118.530   1
  -7  11 -27 1413.07 118.170   2
   4   7  27 1474.33 171.448   2
  11  -4 -30 801.274 167.875   3
   7 -11  30 765.203 97.8616   1
   4   7  30 648.970 82.4564   1
  -7  11 -30 720.824 100.483   2
  11  -4 -33 1061.24 188.122   3
  11  -4 -33 633.643 76.2159   1
  -7  11 -33 1001.81 115.092   2
  11  -4 -36 1207.48 200.523   3
  11  -4 -36 892.141 187.381   2
  -7  11 -36 779.814 121.554   2
  11  -4 -39 989.039 195.811   3
   5   6 -37 572.813 127.650   3
   6 -11 -37 273.311 186.333   3
   5   6 -34 1307.65 152.951   3
   6 -11 -34 1376.01 215.332   3
   6 -11 -31 629.014 158.118   3
   5   6 -31 536.255 121.394   3
  11  -5  31 385.407 121.003   3
  11  -5  31 417.735 73.1394   1
   5   6 -31 422.430 74.0425   1
   6 -11 -28 945.576 96.2424   1
   5   6 -28 1064.32 94.8747   1
   6 -11 -28 1116.12 169.509   3
  11  -5  28 794.600 131.976   3
   6 -11 -25 11729.5 384.298   1
  11  -5  25 10728.3 421.568   3
   5   6 -25 10861.5 370.843   1
  11  -5  22 7135.55 316.307   3
   6 -11 -22 7383.40 284.162   1
   5   6 -22 7628.93 275.933   1
   5   6 -19 18837.3 577.512   1
  11  -5  19 18957.1 572.796   2
   6 -11 -19 18010.3 674.353   3
   6 -11 -19 18591.8 589.263   1
   6 -11 -16 39878.5 1244.34   3
  -6  11  16 40816.9 1206.76   2
   5   6 -16 40276.6 1156.78   1
  11  -5  16 40201.7 1132.96   2
   6 -11 -16 41590.4 1168.15   1
   5   6 -13 30468.2 896.854   1
   6 -11 -13 29423.2 961.567   3
  11  -5  13 30511.9 858.575   2
  -6  11  13 30512.7 921.478   2
   6 -11 -13 30699.4 903.415   1
   6 -11 -10 60710.5 1784.53   3
  -6  11  10 62965.3 1746.54   2
   6 -11 -10 63857.7 1739.32   1
   5   6 -10 61187.7 1734.18   1
   6 -11  -7 74910.9 2114.48   3
   5   6  -7 74419.3 2080.80   1
  -6  11   7 75026.3 2087.94   1
   6 -11  -7 76646.2 2085.56   1
  -6  11   7 76235.1 2076.79   2
  -6  11   4 94603.9 2592.41   1
  -6  11   4 95755.6 2563.78   2
   6 -11  -4 93011.6 2595.77   3
  -6  11   1 259902. 6756.76   2
   6 -11  -1 255650. 6791.77   1
   6 -11  -1 250982. 6785.37   3
  -6  11   1 252281. 6797.53   1
   6 -11   2 180461. 4909.68   3
  -6  11  -2 176300. 4937.57   1
   6 -11   5 200420. 5119.10   1
   6 -11   5 186095. 5067.21   3
  -6  11  -8 172658. 4712.36   1
   5   6   8 170565. 4729.17   1
   6 -11   8 183440. 4714.52   1
   6 -11  11 60612.7 1628.47   1
   5   6  11 54732.8 1644.71   1
   5   6  14 18503.8 639.410   1
   5   6  14 19512.9 678.508   3
   6 -11  14 20070.3 614.900   1
   5   6  17 10139.2 395.802   2
   6 -11  17 10017.9 356.449   1
   5   6  17 9073.45 377.414   1
   5   6  17 10259.7 432.656   3
   5   6  20 2409.75 169.201   1
   5   6  20 2781.14 186.871   2
   6 -11  20 2726.80 155.247   1
   5   6  20 2809.50 215.756   3
   6 -11  23 1154.57 108.756   1
   5   6  23 1061.36 164.171   3
   5   6  23 953.769 106.120   1
   5   6  23 1323.15 137.038   2
  11  -5 -26 8369.83 422.921   3
   6 -11  26 9316.61 329.482   1
   5   6  26 9427.42 438.376   3
   5   6  26 7670.23 315.266   1
   5   6  26 9393.43 394.458   2
  -6  11 -26 8626.69 317.436   2
  11  -5 -29 5010.70 324.691   3
   5   6  29 5569.57 335.247   3
  11  -5 -29 4802.82 306.757   2
   5   6  29 4377.62 203.189   1
  -6  11 -29 4552.50 218.822   2
   5   6  29 4928.98 284.973   2
   6 -11  29 4918.10 222.466   1
  11  -5 -32 3482.64 152.999   1
  11  -5 -32 3741.26 292.017   3
   5   6  32 3433.41 158.062   1
  -6  11 -32 3928.22 202.986   2
  -6  11 -35 2608.01 169.383   2
  11  -5 -35 2748.71 256.514   3
  11  -5 -38 608.711 178.221   3
  -6  11 -38 583.332 116.650   2
   6   5 -38 141.412 105.482   3
   6   5 -35 94.2794 96.8100   3
   6   5 -35-1.07698 36.9989   1
   6   5 -32 32.4250 84.0520   3
  11  -6  32 88.3193 80.7636   3
   6   5 -32-118.622 71.6982   1
   5 -11 -32-143.371 154.343   3
  11  -6  29 628.847 75.6566   1
   6   5 -29 540.220 107.768   3
  11  -6  29 610.762 97.8080   3
   5 -11 -29 539.640 143.597   3
   6   5 -29 493.822 70.0253   1
   6   5 -26-20.2926 61.2118   1
   5 -11 -26-72.3896 129.596   3
   5 -11 -26-71.9326 75.5967   1
  11  -6  26-73.3560 87.8474   3
   5 -11 -23 2549.00 144.720   1
   6   5 -23 2467.00 133.245   1
  11  -6  23 2359.68 158.965   3
   6   5 -20 3422.36 167.782   1
   5 -11 -20 3410.60 238.850   3
   5 -11 -20 3617.48 179.947   1
   6   5 -17 7048.82 273.371   1
   5 -11 -17 6851.12 338.784   3
   5 -11 -17 7113.94 279.788   1
  11  -6  17 7304.63 249.384   2
  -5  11  14 14392.8 481.953   1
   5 -11 -14 15173.9 485.416   1
  11  -6  14 14490.1 433.787   2
  -5  11  14 14682.7 509.619   2
   5 -11 -14 14059.1 539.011   3
  -5  11  11 6566.01 274.087   1
   5 -11 -11 7370.73 279.966   1
  -5  11  11 6920.98 288.767   2
   5 -11 -11 6997.72 317.192   3
   5 -11  -8 67.6990 59.8318   3
  -5  11   8 3.55178 52.0118   1
  -5  11   8 20.0819 67.4654   3
  -5  11   8-3.31317 52.2077   2
   5 -11  -8 10.1335 52.7056   1
   5 -11  -5 381.544 63.7575   3
  -5  11   5 248.155 59.5648   2
  -5  11   5 415.333 65.0310   1
  -5  11   2 3713.53 169.715   2
  -5  11   2 4231.06 197.892   3
  -5  11   2 4029.82 194.816   1
   5 -11  -2 3703.82 181.306   3
  -5  11  -1 1060.20 95.0060   1
   5 -11   1 999.351 90.9671   1
   5 -11   1 1055.63 83.8537   3
   5 -11   4 30255.4 898.612   1
  -5  11  -7 68427.1 1988.42   1
   5 -11   7 75089.2 1991.99   1
   5 -11  10 22680.6 697.754   1
  -5  11 -10 22579.9 701.856   1
  -5  11 -13 446.454 70.0480   1
   5 -11  13 390.421 73.4232   1
   6   5  16 424.111 84.7320   1
   5 -11  16 430.853 77.3598   1
   6   5  16 411.958 98.0095   3
   5 -11  19 3360.60 177.723   1
   6   5  19 3467.92 233.559   3
   6   5  19 3821.53 212.509   2
   6   5  19 3044.98 191.281   1
   6   5  22 3636.20 202.882   1
   5 -11  22 3909.70 192.635   1
   6   5  22 4164.98 257.959   3
   6   5  22 3764.34 222.199   2
   5 -11  25-93.4909 80.7197   1
   6   5  25-18.5979 68.1242   1
  11  -6 -25-40.1786 126.214   3
   6   5  25 40.2801 74.8777   2
   6   5  25-61.1407 111.498   3
  11  -6 -25-69.7712 106.316   2
   6   5  28 1648.50 185.618   3
   6   5  28 1246.14 113.766   1
  11  -6 -28 1625.84 109.335   1
   6   5  28 1726.40 166.508   2
  11  -6 -28 1490.79 189.485   3
  -5  11 -28 1588.03 125.628   2
  11  -6 -28 1682.03 186.800   2
   6   5  31 1672.02 195.417   3
  11  -6 -31 1492.27 200.813   3
   6   5  31 1428.63 100.499   1
  -5  11 -31 1481.08 129.176   2
  11  -6 -31 1679.10 191.096   2
  11  -6 -31 1244.09 93.5565   1
  11  -6 -34 1016.74 68.6746   1
  -5  11 -34 908.238 118.901   2
  11  -6 -34 1073.02 192.782   3
  11  -6 -37 207.818 152.135   3
  -5  11 -37 492.135 105.115   2
  -5  11 -40 5.06474 93.1939   2
   7   4 -39-181.473 118.590   3
   7   4 -36 177.880 102.546   3
   7   4 -33 113.247 88.9556   3
  11  -7  30 367.110 92.1279   3
   7   4 -30 455.861 115.477   3
  11  -7  30 532.311 75.0872   1
   4 -11 -30 369.608 135.675   3
   7   4 -30 651.918 71.9703   1
  11  -7  27-26.9245 59.2149   3
  11  -7  27 59.2902 53.7639   1
   4 -11 -27-105.142 121.077   3
   7   4 -27-25.3360 58.7061   1
  11  -7  24 148.227 69.3896   3
   4 -11 -24 136.685 63.9807   1
  11  -7  24 378.735 68.7002   1
   7   4 -24 220.305 60.1880   1
   4 -11 -21 3208.81 168.584   1
  11  -7  21 2798.95 163.956   3
   7   4 -21 2984.05 157.392   1
  -4  11  18 12567.6 496.494   3
  -4  11  18 10969.9 394.044   1
   4 -11 -18 11700.9 403.171   1
   4 -11 -18 11402.6 478.562   3
   4 -11 -15 19320.0 595.968   1
  -4  11  15 17989.2 587.286   1
   4 -11 -15 18695.7 659.061   3
  11  -7  12 30064.7 811.136   2
   4 -11 -12 30407.5 885.417   1
  -4  11  12 27536.7 879.381   1
  -4  11  12 30243.4 903.562   2
   4 -11 -12 28855.1 937.036   3
  -4  11   9 17899.6 597.522   3
  -4  11   9 16365.1 545.043   1
   4 -11  -9 16863.8 543.123   1
  -4  11   9 16612.6 548.034   2
   4 -11  -9 16206.8 574.986   3
   4 -11  -6 1547.90 125.780   3
  -4  11   6 2039.88 147.144   3
  -4  11   6 2248.49 136.009   1
  -4  11   6 2032.39 123.133   2
   4 -11  -6 1731.20 121.189   1
  -4  11   3 440.633 69.8324   3
  -4  11   3 356.438 59.9561   1
   4 -11  -3 360.249 61.7420   3
   4 -11   0 3156.74 166.309   1
  -4  11   0 3449.28 170.308   3
   4 -11   3 6477.81 266.664   1
  -4  11  -3 6813.29 253.190   3
  -4  11  -6 3303.89 141.868   3
   4 -11   6 3268.13 171.638   1
  -4  11  -9 11534.3 409.033   1
   4 -11   9 11528.1 405.904   1
   4 -11  12 23947.3 721.154   1
  -4  11 -12 22590.6 717.214   1
   4 -11  15 46312.3 1324.71   1
  -4  11 -15 46338.8 1325.97   1
   7   4  18 10977.8 421.066   2
   4 -11  18 11277.4 393.017   1
  -4  11 -18 10703.8 387.768   1
   7   4  18 10912.6 450.756   3
   7   4  21 2009.92 156.462   1
   7   4  21 2091.08 169.579   2
   4 -11  21 2298.51 147.867   1
   7   4  21 2443.32 197.598   3
   7   4  24 639.775 97.1064   1
  11  -7 -24 626.900 149.978   3
   7   4  24 689.538 120.306   2
   4 -11  24 675.721 96.5541   1
  11  -7 -24 702.746 131.461   2
   7   4  24 717.660 140.207   3
   7   4  27 809.802 144.640   3
   7   4  27 337.957 82.1800   1
  11  -7 -27 745.698 136.073   2
  11  -7 -27 484.378 140.582   3
   7   4  27 417.192 121.809   2
  11  -7 -27 634.446 78.7161   1
  11  -7 -30 70.0948 107.879   2
   7   4  30 8.31206 107.114   3
  11  -7 -30-11.4872 57.6839   1
  11  -7 -30-43.6256 121.362   3
  -4  11 -30 29.7729 64.8076   2
   7   4  30-22.8786 59.0014   1
   7   4  30-31.1235 105.746   2
  11  -7 -33-9.84953 44.0696   1
  -4  11 -33 45.5422 74.7297   2
  11  -7 -33-18.0785 135.319   3
  11  -7 -33 16.7369 109.915   2
  -4  11 -36 34.6828 84.1728   2
  11  -7 -36-128.341 139.196   3
  -4  11 -39 20.8060 89.3470   2
  11  -7 -39-123.409 164.833   3
   8   3 -40 13.3001 109.447   3
   8   3 -37 6.69901 104.525   3
   8   3 -34-64.9797 105.676   3
  11  -8  31 335.009 79.8335   3
   8   3 -31 208.544 120.963   3
  11  -8  31 260.321 66.3029   1
   8   3 -31 463.822 64.9815   1
  11  -8  28 1862.31 129.781   3
   8   3 -28 1938.57 118.849   1
  11  -8  28 2014.29 125.952   1
   8   3 -25 3420.01 164.713   1
  11  -8  25 3677.87 174.692   1
  -3  11  22 1045.89 157.354   3
  -3  11  22 1055.95 93.4250   1
  11  -8  22 1082.89 99.4368   1
  -3  11  22 975.086 127.312   2
  11  -8  22 687.046 83.9076   3
  -3  11  19 11710.1 480.881   3
   3 -11 -19 10895.2 459.387   3
   3 -11 -19 11288.0 388.869   1
  -3  11  16 17818.4 638.257   3
   3 -11 -16 16068.1 609.457   3
  -3  11  16 16041.4 545.212   1
   3 -11 -16 17925.5 556.995   1
   3 -11 -13 33435.0 952.957   1
  -3  11  13 30789.9 946.248   1
   3 -11 -13 31282.0 999.445   3
   3 -11 -10 42972.2 1219.36   1
  -3  11  10 43190.0 1230.27   2
  -3  11  10 41226.6 1220.38   1
   3 -11 -10 40840.5 1252.54   3
  -3  11   7 468.245 74.5496   1
   3 -11  -7 423.957 79.9882   3
  -3  11   7 320.951 72.0679   2
   3 -11  -7 385.427 71.8263   1
  -3  11   4 1305.54 112.869   3
  -3  11   4 1030.71 97.4451   1
  -3  11   1 8445.30 317.003   3
  -3  11   1 7663.43 316.001   1
   3 -11  -1 7890.13 308.454   1
   3 -11   2 29427.2 884.519   1
  -3  11  -2 31356.9 874.739   3
  -3  11  -5 759.516 69.8301   3
   3 -11   5 725.908 86.0372   1
   3 -11   8 16806.8 556.422   1
  -3  11  -8 16876.9 560.331   1
  -3  11  -8 17311.6 507.947   3
   3 -11  11 27584.6 812.945   1
  -3  11 -11 25602.6 807.685   1
  -3  11 -14 39837.6 1187.78   1
   3 -11  14 42325.7 1195.43   1
  -3  11 -17 15273.9 513.792   1
   3 -11  17 15883.1 519.969   1
  11  -8 -17 15422.1 556.595   2
   3 -11  20 106.531 68.9082   1
   8   3  20 191.964 101.532   3
   8   3  20 38.6917 81.9972   2
  -3  11 -20 218.771 67.0944   1
  11  -8 -20 76.1586 81.2115   2
  11  -8 -23 808.957 147.669   3
   8   3  23 632.227 112.497   2
  11  -8 -23 762.712 86.9896   1
  -3  11 -23 883.004 92.9501   1
  11  -8 -23 720.240 122.183   2
   8   3  23 615.977 131.534   3
   8   3  26 492.861 89.3750   1
  11  -8 -26 661.321 82.8276   1
   8   3  26 408.038 140.861   3
  11  -8 -26 688.018 142.551   3
   8   3  26 528.780 120.484   2
  11  -8 -26 678.072 130.430   2
   8   3  29 922.759 160.017   3
   8   3  29 775.481 92.1379   1
  11  -8 -29 914.085 85.0871   1
  11  -8 -29 1000.27 152.893   2
   8   3  29 715.934 129.357   2
  11  -8 -29 1244.23 173.901   3
  -3  11 -32 14.2809 77.4066   2
  11  -8 -32 5.99153 46.7605   1
   8   3  32-42.5409 135.796   3
  11  -8 -32 9.16104 122.554   3
   8   3  32 30.5837 50.2389   1
  11  -8 -32-8.18818 111.010   2
   8   3  32-64.4063 114.492   2
  11  -8 -35-92.2746 136.642   3
  11  -8 -35-70.0750 119.795   2
  -3  11 -35 5.03654 86.2819   2
  11  -8 -38 9.64681 136.401   3
  -3  11 -38-26.9346 105.524   2
  -3  11 -41-28.2471 107.364   2
   9   2 -41 295.907 141.590   3
   9   2 -38 370.009 142.448   3
   9   2 -35 1192.68 82.6266   1
   9   2 -35 1170.38 169.644   3
   9   2 -32 2061.51 203.682   3
   9   2 -32 2397.73 127.155   1
  11  -9  29 1826.06 124.944   1
  11  -9  29 1609.77 117.458   3
   9   2 -26 264.469 68.2482   1
  11  -9  26 389.929 74.8887   1
  -2  11  26 183.011 125.848   3
  -2  11  26 153.885 106.643   2
  11  -9  26 188.467 57.8748   3
  -2  11  23 1366.66 176.531   3
  11  -9  23 1269.44 108.507   1
  -2  11  23 947.167 94.4196   1
  -2  11  23 1077.61 138.425   2
  11  -9  23 925.406 84.4355   3
  -2  11  20 9941.30 373.706   1
  -2  11  20 11362.9 476.851   3
  11  -9  20 12007.0 389.338   1
  -2  11  20 10765.8 428.520   2
  11  -9  20 9243.54 340.423   3
  -2  11  17 2806.26 221.855   3
   2 -11 -17 2905.09 164.342   1
  -2  11  17 2414.37 156.289   1
  -2  11  14 7123.23 302.794   1
   2 -11 -14 8001.62 308.822   1
   2 -11 -11 32645.7 948.819   1
  -2  11  11 30329.5 946.410   1
   2 -11  -8 37033.7 1050.60   1
  -2  11   8 38130.1 1096.34   3
  -2  11   5 48481.9 1366.14   3
  -2  11   5 45668.6 1346.51   1
  11  -9   5 46153.4 1236.24   2
  11  -9   2 69371.0 1875.27   2
  -2  11   2 66884.6 1959.54   1
  -2  11  -1 57467.8 1704.83   1
  -2  11  -1 63039.3 1693.64   3
   2 -11   1 59550.7 1695.06   1
  -2  11  -4 29650.6 849.251   3
   2 -11   4 27428.4 865.909   1
   2 -11   7 17012.1 568.790   1
  -2  11  -7 16549.0 567.467   1
  -2  11  -7 18117.2 533.112   3
  11  -9  -7 17017.1 550.351   2
   2 -11  10 12017.8 419.960   1
  -2  11 -10 12143.3 366.200   3
  11  -9 -10 11319.0 415.078   2
  -2  11 -13 7597.28 309.758   1
  11  -9 -13 7914.87 327.337   2
   2 -11  13 8006.73 318.534   1
  -2  11 -16 1710.24 129.197   1
  11  -9 -16 1863.64 156.638   2
   2 -11  16 1886.68 140.106   1
  -2  11 -19 5178.88 232.384   1
  11  -9 -19 5210.26 228.186   1
   9   2  19 4947.18 250.119   2
  11  -9 -19 5012.26 269.665   2
   9   2  22 5233.08 297.122   3
  -2  11 -22 5180.83 229.789   1
  11  -9 -22 4853.11 280.192   2
  11  -9 -22 5414.00 227.665   1
   9   2  22 4627.00 252.846   2
   9   2  25 970.767 169.733   3
  11  -9 -25 1256.20 105.278   1
  11  -9 -25 1345.02 178.795   3
   9   2  25 1185.54 140.245   2
  -2  11 -25 1330.15 111.452   1
  11  -9 -25 1200.13 157.281   2
  11  -9 -28 1974.08 211.954   3
  11  -9 -28 2139.49 126.722   1
   9   2  28 2000.89 142.310   1
  11  -9 -28 2162.05 201.770   2
   9   2  28 2187.45 209.550   3
   9   2  28 2039.42 174.066   2
  11  -9 -31 1797.54 211.398   3
   9   2  31 1453.81 113.149   1
   9   2  31 2038.61 213.050   3
  11  -9 -31 1890.58 111.284   1
  11  -9 -31 1883.05 199.666   2
   9   2  31 1759.09 175.525   2
  11  -9 -34 337.142 138.971   2
  11  -9 -34 345.416 148.293   3
  -2  11 -34 319.694 101.490   2
  11  -9 -34 314.740 57.2304   1
  11  -9 -37 264.760 146.370   3
  -2  11 -37 181.001 103.209   2
  -2  11 -40 58.0578 108.606   2
  10   1 -39 551.952 174.398   3
  10   1 -36 1195.17 188.794   3
  10   1 -33 3130.50 260.463   3
  10   1 -33 3538.35 164.830   1
  10   1 -30 5798.67 236.441   1
  11 -10  30 5522.34 234.606   1
  -1  11  27 5984.04 362.382   3
  11 -10  27 5893.25 247.143   1
  -1  11  27 5039.44 229.281   1
  11 -10  24 765.055 72.5666   3
  -1  11  24 936.094 165.764   3
  -1  11  24 853.650 99.8029   1
  11 -10  24 985.436 105.098   1
  -1  11  24 961.170 138.525   2
  -1  11  21 1664.08 190.978   3
  11 -10  21 1795.65 132.355   1
  11 -10  21 1511.90 92.4089   3
  -1  11  21 1800.31 163.895   2
  -1  11  21 1623.16 125.372   1
  -1  11  18 9495.02 379.512   1
  -1  11  18 10160.9 417.777   2
  -1  11  18 10587.0 470.425   3
  11 -10  18 11119.0 385.878   1
  -1  11  15 15468.4 565.358   1
  11 -10  15 18836.2 572.139   1
  -1  11  12 79809.5 2273.07   1
   1 -11 -12 83243.0 2268.76   1
   1 -11  -9 148443. 4011.14   1
  -1  11   9 144434. 4018.38   1
  -1  11   9 151941. 4059.12   3
  -1  11   6 182380. 4759.28   3
   1 -11  -6 173441. 4721.46   1
  -1  11   6 170886. 4733.37   1
  11 -10   3 152653. 4115.71   2
  -1  11   3 156643. 4230.88   1
   1 -11   0 109647. 3014.54   1
  11 -10   0 109637. 2938.55   2
  -1  11   0 104772. 3018.67   1
  -1  11   0 116135. 3017.77   3
   1 -11   3 60245.6 1716.50   1
  11 -10  -3 58012.0 1658.97   2
   1 -11   6 55426.5 1610.81   1
  11 -10  -6 55677.6 1576.16   2
  -1  11  -6 58075.4 1580.44   3
  -1  11  -9 63434.5 1810.76   1
  -1  11  -9 66344.7 1765.53   3
   1 -11   9 62599.5 1811.71   1
  11 -10  -9 63092.9 1796.83   2
  11 -10 -12 33458.1 1003.76   2
  -1  11 -12 32908.4 993.031   1
   1 -11  12 33259.2 1000.37   1
  11 -10 -15 45946.8 1286.22   1
  -1  11 -15 43472.5 1283.59   1
  11 -10 -15 43032.5 1371.90   3
  11 -10 -15 45042.6 1319.70   2
  11 -10 -18 27739.5 947.986   3
  10   1  18 27804.4 861.800   2
  -1  11 -18 27346.3 839.608   1
  11 -10 -18 27890.6 840.840   1
  11 -10 -18 27991.2 892.834   2
  10   1  21 11341.9 405.576   2
  11 -10 -21 12208.9 381.451   1
  11 -10 -21 11928.6 449.172   2
  10   1  21 11825.9 462.719   3
  -1  11 -21 11696.1 381.577   1
  -1  11 -24 10780.3 381.485   1
  10   1  24 10349.0 411.313   2
  11 -10 -24 10368.8 451.024   2
  10   1  24 10802.9 468.585   3
  11 -10 -24 10185.4 369.008   1
  11 -10 -27 3286.14 264.196   3
  11 -10 -27 3243.94 165.883   1
  11 -10 -27 3644.71 256.858   2
  10   1  27 3135.02 206.454   2
  -1  11 -27 3060.68 170.836   1
  10   1  27 3490.97 251.230   3
  11 -10 -30 2744.63 247.859   3
  10   1  30 2668.48 235.557   3
  11 -10 -30 2582.67 142.764   1
  11 -10 -30 2976.43 237.869   2
  10   1  30 2665.46 198.698   2
  10   1  30 2465.40 161.545   1
  11 -10 -33 1359.54 213.339   3
  11 -10 -33 1533.16 197.495   2
  11 -10 -33 1413.85 98.2820   1
  -1  11 -36 764.839 135.645   2
  11 -10 -36 717.564 179.586   3
  -1  11 -39 572.898 134.153   2
  -1  11 -42 593.762 145.219   2
  11   0 -40 215.117 147.935   3
  11   0 -37 341.794 149.653   3
  11   0 -34 1127.47 179.000   3
  11   0 -34 693.149 98.7485   1
  11   0 -31 3377.80 181.615   1
  11 -11  28 1433.25 119.965   1
   0  11  28 1170.26 108.201   1
   0  11  25 1680.09 130.035   1
   0  11  25 1705.65 176.504   2
   0  11  25 1901.28 216.384   3
  11 -11  25 1779.47 141.967   1
   0  11  22 156.749 90.4455   2
  11 -11  22 53.4002 72.8378   1
   0  11  22 74.8136 118.497   3
  11 -11  22 78.7976 28.0930   3
   0  11  22 44.8713 73.6438   1
  11 -11  19 19.1737 27.7152   3
   0  11  19-77.8730 121.102   3
   0  11  19-43.1284 77.8323   1
   0  11  19 103.790 81.8573   2
  11 -11  19-31.0958 76.4607   1
   0  11  16 2295.62 157.647   1
   0  11  16 2123.10 200.566   3
   0  11  16 2205.82 174.931   2
  11 -11  16 2596.10 159.475   1
   0  11  13 2356.11 164.555   1
  11 -11  13 2625.33 161.357   1
  11 -11  10 17016.7 547.982   1
   0  11  10 15465.1 564.525   1
   0  11   7 34507.3 1062.51   3
  11 -11   7 34452.2 1014.28   1
   0  11   7 32888.3 1038.43   1
   0  11   4 50518.6 1472.97   3
   0  11   4 48547.4 1464.65   1
  11 -11   4 51157.8 1440.10   1
   0 -11  -1 43980.6 1299.14   1
  11 -11   1 46595.5 1290.71   1
   0  11   1 47871.9 1315.84   3
   0  11   1 42670.2 1305.16   1
  11 -11   1 42825.0 1208.77   2
  11 -11  -2 48070.2 1323.22   2
   0  11  -2 44516.0 1387.44   1
   0  11  -2 49795.8 1386.28   3
   0 -11   2 48190.3 1392.58   1
  11 -11  -5 34809.7 994.023   2
   0 -11   5 33953.7 1040.53   1
  11 -11  -8 8758.62 335.732   1
  11 -11  -8 8034.53 322.058   2
   0  11  -8 9037.01 350.384   1
  11 -11 -11 13772.2 545.689   3
  11 -11 -11 14246.6 499.527   2
  11 -11 -11 15118.4 495.357   1
   0  11 -11 14210.0 497.845   1
  11 -11 -14 4956.80 294.529   3
  11 -11 -14 5412.70 265.338   2
  11 -11 -14 5538.42 245.695   1
   0  11 -14 5443.00 247.033   1
   0  11 -17 81.8329 68.9292   1
  11 -11 -17 103.509 101.554   3
  11 -11 -17 3.82025 71.3029   1
  11 -11 -17 37.8729 82.4486   2
  11 -11 -20 2842.32 242.608   3
   0  11 -20 3295.53 179.055   1
  11   0  20 3451.63 195.411   2
  11 -11 -20 3001.26 212.491   2
  11 -11 -20 2972.65 174.454   1
  11   0  23 1771.76 146.760   2
  11   0  23 1620.45 178.100   3
  11 -11 -23 1562.37 171.116   2
  11 -11 -23 1521.20 126.103   1
   0  11 -23 1580.33 128.129   1
   0  11 -23 1536.66 83.5664   3
  11 -11 -26 330.637 145.088   3
  11 -11 -26 305.830 121.429   2
   0  11 -26 349.886 40.7759   3
  11   0  26 462.419 97.9718   2
  11 -11 -26 225.578 71.2687   1
   0  11 -26 133.139 86.9815   1
  11   0  26 297.205 124.093   3
  11   0  29 1110.23 161.162   3
  11 -11 -29 893.744 170.497   3
   0  11 -29 1081.88 106.382   1
  11 -11 -29 1070.32 163.225   2
  11   0  29 1048.12 129.922   2
  11 -11 -29 996.957 99.3360   1
  11 -11 -32 1362.11 204.660   3
  11 -11 -32 1357.99 105.633   1
  11 -11 -32 1681.46 202.596   2
  11   0  32 1472.99 190.183   3
  11 -11 -35 425.135 173.275   3
   0  11 -38 270.484 118.075   2
   0  11 -41 340.474 129.646   2
   1  11 -40-118.922 118.085   2
  11 -12 -34 393.442 160.305   3
  11 -12 -34 373.268 148.628   2
  12  -1  31 1351.16 182.772   3
   1  11 -31 1342.99 114.776   1
  11 -12 -31 1466.86 209.052   3
   1  11 -31 1273.74 72.1767   3
  11 -12 -31 1197.98 111.253   1
  11 -12 -31 1417.68 188.620   2
  12  -1  28 96.6303 114.433   3
  11 -12 -28-112.568 83.1283   1
   1  11 -28 60.1208 44.0590   3
  12  -1  28 10.3174 82.3365   2
  11 -12 -28-68.5260 116.418   2
   1  11 -28-83.7913 88.4406   1
  11 -12 -28-82.5812 127.096   3
  11 -12 -25 5269.08 236.406   1
   1  11 -25 5011.67 195.754   3
  11 -12 -25 5328.19 320.279   2
   1  11 -25 5356.23 243.883   1
  12  -1  25 5239.40 265.311   2
  12  -1  25 5519.00 310.426   3
  11 -12 -22 8165.52 432.573   3
  12  -1  22 8731.65 348.692   2
  11 -12 -22 8468.79 397.559   2
  11 -12 -22 8840.55 338.239   1
   1  11 -22 8655.02 334.243   1
  11 -12 -19 19069.9 713.703   3
  12  -1  19 18396.1 608.753   2
  11 -12 -19 19097.2 664.450   2
  11 -12 -19 18787.7 606.694   1
   1  11 -19 18330.9 602.921   1
  11 -12 -16 11276.6 414.434   1
  11 -12 -16 11825.2 447.900   2
  11 -12 -16 10769.4 485.015   3
   1  11 -16 11495.5 414.985   1
  11 -12 -13 1864.78 149.521   2
  11 -12 -13 2065.80 179.974   3
  11 -12 -13 2132.07 145.360   1
   1  11 -13 2149.34 147.126   1
  11 -12 -10 70.3409 68.4328   3
  11 -12 -10-40.2942 75.3833   2
  11 -12 -10 45.2492 60.2550   1
   1  11 -10 201.608 71.0650   1
  11 -12  -7 677.950 80.3642   2
   1  11  -7 732.388 99.7424   1
  11 -12  -7 672.504 103.300   3
  11 -12  -7 662.333 87.4199   1
  11 -12  -4 113.569 42.8918   2
  11 -12  -1 187.418 63.1450   1
   1  11  -1 118.865 63.0147   1
  11 -12   2 4001.66 203.400   1
   1  11   2 3973.82 222.094   1
   1  11   2 4012.07 225.941   3
  11 -12   5 5535.47 244.058   1
   1  11   5 5236.01 275.651   3
   1  11   8 511.995 88.0176   1
   1  11   8 714.336 109.637   3
  11 -12  11 8888.79 347.753   1
   1  11  11 8934.93 371.038   1
   1  11  14 52.0387 68.6713   1
   1  11  14-21.5310 92.9650   2
  11 -12  14 32.8195 70.8538   1
   1  11  17-44.9217 120.632   3
   1  11  17 119.266 71.4005   1
  11 -12  17 28.3947 73.9364   1
   1  11  17 63.3809 77.7830   2
   1  11  20 2111.71 216.898   3
   1  11  20 1867.60 149.741   1
   1  11  20 2368.11 183.802   2
  11 -12  20 2127.17 151.550   1
   1  11  23 96.4568 126.583   3
  11 -12  23 217.154 80.9268   1
   1  11  23 245.051 80.3275   1
   1  11  23 230.626 103.978   2
   1  11  26 403.861 91.6187   1
  11 -12  26 710.622 98.2950   1
   1  11  29 173.477 68.0527   1
  11 -12  29 160.537 71.4554   1
  12  -1 -32 16.4639 109.129   3
  12  -1 -35 92.4425 126.733   3
  12  -1 -38-94.6834 144.605   3
  10 -12 -35-10.1136 146.419   3
   2  10 -32 355.991 76.2887   3
  10 -12 -32 549.401 179.752   3
  10 -12 -32 361.229 148.884   2
  10 -12 -32 367.523 87.9936   1
  12  -2  32 424.565 143.162   3
   2  10 -32 438.079 87.0451   1
  10 -12 -29 2765.64 249.924   3
  10 -12 -29 2886.55 233.122   2
  10 -12 -29 2523.67 152.448   1
   2  10 -29 2476.70 139.762   3
  12  -2  29 2645.49 187.085   2
  12  -2  29 2449.70 217.631   3
   2  10 -29 2594.41 156.162   1
   2  10 -26 5016.91 230.308   1
  10 -12 -26 5367.13 312.101   2
   2  10 -26 5082.41 214.862   3
  12  -2  26 5183.57 258.969   2
  10 -12 -26 4928.21 226.564   1
  12  -2  26 5165.15 295.162   3
  10 -12 -23 7129.78 291.941   1
   2  10 -23 7188.82 290.794   1
  10 -12 -23 7504.25 365.752   2
  12  -2  23 7508.92 312.498   2
  10 -12 -20 10228.7 431.390   2
  12  -2  20 10690.7 380.973   2
  10 -12 -20 10079.7 469.402   3
   2  10 -20 10214.8 373.885   1
  10 -12 -20 9952.55 374.744   1
  10 -12 -17 17779.0 681.980   3
  10 -12 -17 19013.0 642.845   2
  10 -12 -17 18456.2 600.591   1
   2  10 -17 18512.8 596.314   1
  10 -12 -14 22731.7 805.960   3
   2  10 -14 23973.8 737.858   1
  10 -12 -14 23719.4 759.784   2
  10 -12 -14 23622.2 735.257   1
   2  10 -11 22798.9 715.056   1
  10 -12 -11 22053.8 768.158   3
  10 -12 -11 22755.0 719.267   2
  10 -12 -11 22549.8 710.666   1
  10 -12  -8 40102.3 1271.04   3
  10 -12  -8 42198.5 1214.45   2
   2  10  -8 42635.3 1239.02   1
  10 -12  -8 43210.8 1230.11   1
  10 -12  -5 48331.6 1362.17   2
  10 -12  -5 48710.7 1430.85   3
  10 -12  -2 17381.8 588.848   3
  10 -12   1 7057.10 292.805   3
   2  10   1 7405.73 315.403   1
  10 -12   1 7322.45 297.418   1
   2  10   4 9480.62 393.442   3
   2  10   4 9509.83 383.230   1
  10 -12   4 9699.44 362.645   1
   2  10   7 7142.01 326.204   1
  10 -12   7 7778.13 308.860   1
   2  10   7 8309.27 356.310   3
  10 -12  10 4856.84 226.658   1
   2  10  10 4872.14 251.007   1
   2  10  13 22219.5 711.892   1
  10 -12  13 23608.8 682.926   1
   2  10  16 14179.3 532.972   2
   2  10  16 15253.6 580.573   3
  10 -12  16 14349.8 495.392   1
   2  10  16 14507.8 522.188   1
   2  10  19 8293.95 404.559   3
  10 -12  19 8238.01 320.594   1
   2  10  19 7363.81 352.834   2
   2  10  19 7917.72 335.626   1
  10 -12  22 5758.89 249.711   1
   2  10  22 5633.50 338.073   3
   2  10  22 4877.93 248.073   1
   2  10  22 5270.02 289.586   2
  10 -12  25-3.78566 62.3041   1
   2  10  25 124.594 131.783   3
   2  10  25-36.1349 80.6073   1
   2  10  25 26.9328 93.6552   2
   2  10  28 25.1181 66.6572   1
  10 -12  28 35.8900 65.2533   1
  12  -2 -31 257.634 130.225   3
   2  10  31 207.670 61.4871   1
  12  -2 -34 441.225 92.3498   1
  12  -2 -34 486.197 150.154   3
  12  -2 -37-174.200 148.038   3
  12  -2 -40-177.610 151.356   3
   9 -12 -36-181.803 163.302   3
   9 -12 -33 106.778 154.935   3
   3   9 -33 3.07450 71.6736   3
  12  -3  33 170.387 114.813   3
   9 -12 -33-39.7653 69.9798   1
   3   9 -33 89.1253 65.0429   1
   9 -12 -33 116.684 132.185   2
   9 -12 -30 437.506 156.431   3
  12  -3  30 769.764 138.269   3
   3   9 -30 371.023 86.4256   3
   9 -12 -30 315.856 78.3134   1
   9 -12 -30 651.846 148.348   2
   3   9 -30 658.222 86.0310   1
   3   9 -27 2868.07 157.536   1
  12  -3  27 2588.93 182.089   2
   9 -12 -27 2400.57 216.629   2
   3   9 -27 2789.63 159.480   3
   9 -12 -27 2542.03 151.887   1
  12  -3  27 2859.61 214.372   3
   9 -12 -24 3520.13 241.376   2
   3   9 -24 3544.01 179.179   1
   9 -12 -24 3248.03 178.136   1
  12  -3  24 3660.67 233.384   3
  12  -3  24 3373.24 192.102   2
   9 -12 -21 1627.87 184.149   3
   9 -12 -21 1730.29 166.025   2
   9 -12 -21 1750.28 127.729   1
  12  -3  21 1933.92 132.748   2
   3   9 -21 1793.44 126.560   1
   9 -12 -18 4056.68 270.974   3
   9 -12 -18 4290.90 210.028   1
  12  -3  18 4676.39 205.156   2
   3   9 -18 4412.40 207.224   1
   9 -12 -18 4408.78 247.825   2
   9 -12 -15 1827.59 172.242   3
   9 -12 -15 1889.19 136.998   1
   3   9 -15 1940.29 134.043   1
   9 -12 -15 2119.63 157.951   2
   9 -12 -12 957.774 123.052   3
   3   9 -12 1075.81 100.636   1
   9 -12 -12 916.746 99.7005   2
   9 -12 -12 855.898 96.5752   1
   9 -12  -9 11796.9 411.154   2
   3   9  -9 11875.7 418.795   1
   9 -12  -9 11305.7 454.234   3
   9 -12  -9 11452.4 411.770   1
   9 -12  -6 17505.6 615.065   3
   9 -12  -6 18525.0 587.909   1
   9 -12  -3 4146.80 212.586   3
   9 -12   0 9929.25 359.779   1
   9 -12   0 8939.69 349.762   3
   3   9   0 10154.5 377.943   1
   3   9   3 2374.77 157.873   1
   9 -12   3 2419.50 136.981   3
   9 -12   3 2570.38 152.529   1
   9 -12   6 5268.04 203.374   3
   3   9   6 5045.35 250.436   1
   9 -12   6 5165.42 231.724   1
   9 -12   9 1388.56 78.6766   3
   3   9   9 1247.12 123.326   1
   9 -12   9 1390.35 112.183   1
   9 -12  12 52.6791 21.3818   3
   3   9  12 35.4863 65.9669   1
   9 -12  12-34.1236 58.5769   1
   9 -12  15 3943.50 200.459   1
   3   9  15 3836.21 217.887   1
   3   9  15 3979.14 251.166   3
   3   9  18 4888.84 266.080   2
   9 -12  18 5303.18 229.990   1
  -9  12 -18 4512.74 146.893   2
   3   9  18 5086.71 246.897   1
   3   9  18 5556.16 305.895   3
   3   9  21 1982.30 194.183   3
  -9  12 -21 1919.77 88.3716   2
   3   9  21 1909.19 175.600   2
   3   9  21 1955.91 148.381   1
   9 -12  21 2160.86 142.993   1
   3   9  24 1375.46 176.589   3
   3   9  24 1010.37 145.221   2
   9 -12  24 1182.53 112.872   1
   3   9  24 940.297 108.374   1
  -9  12 -24 1054.85 74.8106   2
   3   9  27-126.797 138.968   3
   3   9  27-84.3302 81.3266   1
  -9  12 -27-51.5928 56.2057   2
   9 -12  27-14.2608 71.0252   1
   3   9  27-164.118 130.545   2
   3   9  30 384.187 70.1320   1
  12  -3 -30 411.970 144.281   3
   9 -12  30 240.484 77.8963   1
  12  -3 -33 776.367 164.826   3
  12  -3 -36 8.81428 151.402   3
  12  -3 -39-196.881 156.303   3
   8 -12 -34 59.0728 144.268   3
   4   8 -34 173.215 64.9191   1
   4   8 -34 314.782 92.6325   3
   4   8 -31 1466.97 138.798   3
   8 -12 -31 1423.31 206.229   3
   8 -12 -31 1836.57 195.511   2
  12  -4  31 1416.47 165.082   3
   4   8 -31 1647.14 116.546   1
   8 -12 -31 1521.17 111.737   1
   8 -12 -28 1204.89 190.133   3
   4   8 -28 1455.41 115.520   1
   8 -12 -28 1629.89 119.188   1
   4   8 -28 1476.70 137.890   3
   8 -12 -28 1724.16 184.489   2
  12  -4  28 1245.13 151.823   3
   8 -12 -25 1237.16 156.332   2
   8 -12 -25 915.331 103.499   1
   4   8 -25 1023.86 101.959   1
  12  -4  25 1307.89 120.970   2
  12  -4  25 1179.58 138.677   3
   8 -12 -22 2150.27 213.966   3
   8 -12 -22 2503.52 193.825   2
   4   8 -22 2587.45 146.445   1
   8 -12 -22 2419.34 149.514   1
  12  -4  22 2421.24 149.421   2
   8 -12 -19 4480.10 282.156   3
   8 -12 -19 4502.11 250.048   2
   4   8 -19 4556.18 207.022   1
  12  -4  19 4424.06 199.819   2
   8 -12 -19 4685.05 215.431   1
   4   8 -16 1370.82 107.331   1
   8 -12 -16 1337.83 131.673   2
  12  -4  16 1180.30 96.5201   2
   8 -12 -16 1334.01 111.292   1
   8 -12 -16 1121.20 144.364   3
   8 -12 -13 3219.27 211.293   3
   8 -12 -13 3064.51 171.057   1
   4   8 -13 3336.73 172.078   1
   4   8 -10 5757.31 245.078   1
   8 -12 -10 5208.77 272.400   3
   8 -12 -10 5508.27 241.897   1
   8 -12  -7 14949.2 537.133   3
   4   8  -7 15156.5 511.350   1
   8 -12  -7 15815.1 512.233   1
  -8  12   7 15119.9 495.962   2
   8 -12  -4 45869.9 1351.92   3
  -8  12   4 46972.1 1304.71   2
   4   8  -1 37676.2 1098.45   1
   8 -12  -1 35746.3 1080.51   3
  -8  12   1 37374.7 1041.26   2
   8 -12  -1 37296.8 1084.61   1
   4   8   2 39506.4 1150.06   1
   8 -12   2 39170.0 1133.34   1
  -8  12  -2 39094.7 1072.18   2
   8 -12   2 37504.0 1108.85   3
   8 -12   5 22032.2 661.492   3
   4   8   5 23171.3 723.803   1
   8 -12   5 23079.7 704.532   1
  -8  12  -5 22343.0 630.313   2
   4   8   8 11503.4 419.590   1
   8 -12   8 11906.6 399.606   1
   4   8  11 12909.7 489.270   1
   4   8  11 13869.8 523.379   3
   8 -12  11 13819.3 465.527   1
   8 -12  14 4203.33 204.154   1
   4   8  14 4047.17 224.224   1
   4   8  14 4056.16 252.178   3
   4   8  17 3658.01 220.985   2
   4   8  17 3629.59 206.810   1
  -8  12 -17 3263.79 124.837   2
   4   8  17 3756.62 242.959   3
   8 -12  17 3691.27 187.513   1
   4   8  20 6831.55 302.949   1
   4   8  20 7022.92 331.558   2
  -8  12 -20 6770.76 231.238   2
   8 -12  20 7603.16 293.177   1
   4   8  20 7358.53 369.599   3
   4   8  23 2179.44 207.665   3
   4   8  23 1833.44 174.434   2
   8 -12  23 2512.12 153.583   1
  -8  12 -23 2081.30 109.630   2
   4   8  23 1935.13 145.645   1
   4   8  26 1841.64 184.184   2
   8 -12  26 2120.56 140.718   1
  -8  12 -26 1813.36 112.257   2
   4   8  26 2112.74 217.776   3
   4   8  26 1803.18 134.038   1
  -8  12 -29 1244.70 106.090   2
   8 -12  29 1605.49 125.869   1
   4   8  29 1310.06 110.846   1
  12  -4 -32 8.68632 139.989   3
  -8  12 -32 160.241 70.5630   2
  -8  12 -35 371.184 88.4699   2
  12  -4 -35 464.540 170.457   3
  12  -4 -38 154.238 141.151   3
   5   7 -35 437.101 116.557   3
   7 -12 -35 283.441 170.918   3
  12  -5  32 690.215 138.558   3
   5   7 -32 1020.14 135.086   3
   7 -12 -32 966.830 187.605   3
   5   7 -32 955.477 95.3082   1
  12  -5  29 2950.56 222.376   3
   5   7 -29 3856.34 178.187   1
   7 -12 -29 3514.69 276.562   3
   7 -12 -29 3745.66 179.682   1
   5   7 -29 3542.95 215.814   3
   7 -12 -26 4776.19 215.882   1
  12  -5  26 4669.59 258.651   3
   5   7 -26 4824.96 210.039   1
  12  -5  23 12086.3 464.959   3
   5   7 -23 12439.9 415.019   1
   7 -12 -23 12528.8 426.181   1
   5   7 -20 17276.1 550.891   1
   7 -12 -20 17374.2 560.942   1
  12  -5  20 17642.8 545.123   2
   7 -12 -20 16859.8 648.996   3
   7 -12 -17 9973.30 436.061   3
   5   7 -17 9797.11 355.519   1
  12  -5  17 10019.2 338.828   2
   7 -12 -17 10247.7 368.826   1
   5   7 -14 654.753 80.3144   1
   7 -12 -14 680.096 86.9199   1
   7 -12 -14 727.875 113.569   3
  -7  12  14 466.183 83.8600   2
   5   7 -11 14763.7 487.628   1
   7 -12 -11 14197.6 530.492   3
   7 -12 -11 14391.8 487.948   1
  -7  12  11 14531.9 492.475   2
   5   7  -8 35577.6 1047.79   1
   7 -12  -8 33673.6 1073.72   3
   7 -12  -8 36433.5 1048.00   1
  -7  12   8 36357.1 1041.09   2
   7 -12  -5 49907.3 1475.49   3
  -7  12   5 52466.9 1441.34   2
   7 -12  -2 263701. 7209.94   3
  -7  12   2 275941. 7174.98   2
   7 -12   1 448557. 11400.0   1
  -7  12  -1 431219. 11344.1   2
   7 -12   1 420055. 11374.6   3
   5   7   1 424851. 11403.5   1
   7 -12   4 113773. 3126.47   3
   7 -12   4 122269. 3172.16   1
   5   7   4 114655. 3179.04   1
   7 -12   7 34880.0 1014.57   3
   5   7   7 36864.6 1096.60   1
   5   7  10 29280.9 922.444   1
   7 -12  10 30413.8 900.270   1
   7 -12  13 2297.34 143.529   1
   5   7  13 2117.49 180.374   3
   5   7  13 1997.34 153.070   1
   7 -12  16 2646.74 157.683   1
   5   7  16 2647.07 209.905   3
   5   7  16 2738.31 179.801   1
   5   7  19 17675.9 629.825   2
   5   7  19 17712.2 611.915   1
   7 -12  19 18252.9 587.171   1
   5   7  19 19414.4 682.734   3
   7 -12  22 19456.9 587.724   1
   5   7  22 18435.6 641.375   2
   5   7  22 18188.2 603.598   1
   5   7  22 18914.1 685.692   3
   5   7  25 7407.64 388.200   3
   7 -12  25 7466.58 291.356   1
   5   7  25 6668.74 287.214   1
   5   7  25 7658.96 353.274   2
  -7  12 -25 6661.32 258.497   2
   7 -12  28 6751.99 272.759   1
   5   7  28 6911.06 399.639   3
  12  -5 -28 6618.28 374.908   3
  -7  12 -28 6184.28 253.805   2
   5   7  28 6537.92 336.724   2
   5   7  28 5900.45 257.575   1
  12  -5 -31 1906.94 218.142   3
  12  -5 -31 2264.19 228.725   2
  12  -5 -31 2180.91 126.422   1
  -7  12 -31 1841.81 137.415   2
   5   7  31 1930.83 126.541   1
  12  -5 -34 597.709 177.059   3
  -7  12 -34 419.009 92.7242   2
  12  -5 -37 543.611 178.515   3
  -7  12 -37 365.398 98.6608   2
   6   6 -36 202.525 113.550   3
   6 -12 -36 168.292 149.871   3
   6   6 -33 238.387 100.467   3
   6   6 -33 52.0759 67.3284   1
   6 -12 -33-103.392 162.343   3
   6   6 -30 53.1674 60.8531   1
   6 -12 -30-53.2555 138.949   3
  12  -6  30 34.4654 81.5142   3
  12  -6  30-23.4020 63.7969   1
   6   6 -30 10.3526 91.0732   3
  12  -6  27 67.4830 87.0363   3
   6   6 -27 97.7531 71.5153   1
   6 -12 -27 154.989 71.3404   1
   6 -12 -24-20.4481 77.0467   1
  12  -6  24 13.9616 79.5014   3
   6   6 -24 37.9816 68.6067   1
   6 -12 -21 4693.47 291.515   3
   6 -12 -21 4883.20 223.877   1
   6   6 -21 4843.58 209.928   1
   6 -12 -18 8271.85 400.727   3
   6 -12 -18 9065.62 338.167   1
  -6  12  18 9073.63 375.332   2
  12  -6  18 9117.16 304.995   2
   6   6 -18 8987.86 327.949   1
   6   6 -15 5787.54 241.880   1
  12  -6  15 5889.72 209.058   2
   6 -12 -15 5797.63 249.221   1
  -6  12  15 5811.11 269.425   2
   6 -12 -15 5226.59 287.047   3
   6 -12 -12 9948.66 354.482   1
  -6  12  12 9541.77 362.975   2
   6   6 -12 9487.84 345.649   1
  -6  12  12 9058.22 347.608   1
   6 -12 -12 9016.04 389.803   3
  -6  12   9 9059.92 355.120   1
   6 -12  -9 9439.38 385.924   3
  -6  12   9 10057.6 361.225   2
   6 -12  -9 9920.66 358.865   1
  -6  12   6 15048.1 502.638   2
  -6  12   6 15679.0 523.746   1
   6 -12  -6 16461.5 521.190   1
   6 -12  -6 15355.8 533.995   3
  -6  12   3 19646.7 623.266   1
  -6  12   3 19553.5 592.729   2
   6 -12  -3 18625.9 614.583   3
   6 -12   0 5977.59 248.309   3
  -6  12   0 6633.83 272.526   1
  -6  12   0 6273.88 236.582   2
   6 -12   0 6569.72 266.427   1
   6 -12   3 20612.0 630.026   1
   6 -12   3 18998.3 593.200   3
   6 -12   6 27395.7 830.201   1
   6 -12   9 14232.6 472.630   1
  -6  12  -9 13281.1 470.506   1
   6 -12  12 5974.33 249.705   1
  -6  12 -12 5549.10 247.684   1
   6   6  12 5371.25 260.210   1
   6   6  15 175.547 69.6559   1
   6 -12  15 217.596 63.3669   1
   6   6  15 99.7267 105.097   3
   6   6  18 200.687 75.7725   1
   6   6  18 296.211 87.9663   2
   6   6  18 87.7287 108.500   3
   6 -12  18 167.185 63.6583   1
   6   6  21-21.6503 109.963   3
   6   6  21 33.2286 70.8075   1
   6 -12  21-11.1817 69.8779   1
   6   6  21 61.5567 78.4851   2
   6   6  24 2990.25 184.938   1
   6   6  24 3741.55 228.664   2
   6 -12  24 3626.76 187.540   1
   6   6  24 3758.29 267.489   3
   6   6  27 3256.39 265.849   3
   6 -12  27 3121.29 177.650   1
   6   6  27 2919.94 171.902   1
  12  -6 -27 3130.04 258.856   3
   6   6  27 3144.60 226.218   2
  12  -6 -27 3160.27 239.547   2
  -6  12 -27 2692.74 160.559   2
  12  -6 -30 1858.31 207.168   3
  12  -6 -30 1738.07 114.349   1
  -6  12 -30 1550.76 132.585   2
   6   6  30 1647.11 117.397   1
  12  -6 -30 1520.76 189.417   2
  12  -6 -33 1106.33 189.259   3
  -6  12 -33 831.647 114.970   2
  12  -6 -33 1057.91 173.142   2
  12  -6 -33 990.197 85.5321   1
  12  -6 -36 93.5407 146.506   3
  -6  12 -36 209.571 94.3310   2
   7   5 -37 119.311 103.631   3
   7   5 -34 47.0581 94.1890   3
  12  -7  31-36.5695 80.4284   3
   7   5 -31 40.2478 90.0108   3
   5 -12 -31-99.6205 145.003   3
   7   5 -31-12.8125 59.7335   1
  12  -7  28 683.025 104.668   3
  12  -7  28 502.528 87.9113   1
   7   5 -28 575.271 84.4129   1
   5 -12 -28 596.289 162.230   3
   7   5 -25 4573.52 204.069   1
  12  -7  25 4519.31 228.363   3
   5 -12 -25 4928.30 222.213   1
   7   5 -22 3666.88 179.886   1
   5 -12 -22 3643.16 189.422   1
   5 -12 -19 9112.34 340.612   1
   7   5 -19 8942.83 331.684   1
   5 -12 -19 9426.12 423.625   3
   5 -12 -16 3908.86 194.004   1
  -5  12  16 3695.58 190.674   1
  -5  12  16 3842.45 217.381   2
  12  -7  16 3893.14 149.330   2
   5 -12 -16 3406.04 232.313   3
   5 -12 -13 1594.17 147.462   3
  -5  12  13 1648.79 124.862   1
  12  -7  13 1655.21 79.0290   2
   5 -12 -13 1524.50 120.371   1
  -5  12  13 1465.11 128.529   2
  -5  12  10 6690.53 314.665   3
   5 -12 -10 6516.32 268.351   1
  -5  12  10 6501.63 272.496   2
  -5  12  10 6117.47 265.845   1
   5 -12 -10 5941.22 290.862   3
  -5  12   7 443.229 87.2679   3
  -5  12   7 421.949 72.1429   1
   5 -12  -7 257.808 72.3549   3
  -5  12   7 259.647 67.5378   2
   5 -12  -7 322.877 66.0395   1
  -5  12   4 2540.22 156.430   1
  -5  12   4 2327.91 134.208   2
   5 -12  -4 2465.31 153.332   3
  -5  12   4 2751.36 168.378   3
  -5  12   1 2448.04 155.682   1
   5 -12  -1 2724.40 155.708   1
  -5  12   1 2842.91 161.010   3
   5 -12  -1 2601.70 146.843   3
  -5  12  -2 238.067 65.2700   1
  -5  12  -2 208.878 50.6957   3
   5 -12   2 109.285 55.3887   1
   5 -12   5 1494.88 115.207   1
  -5  12  -8 10883.5 404.386   1
   5 -12   8 11335.8 401.536   1
   5 -12  11 6756.92 274.381   1
  -5  12 -11 5910.99 264.103   1
   5 -12  14 977.560 97.5850   1
  -5  12 -14 843.972 93.5471   1
   5 -12  17 7301.50 288.194   1
   7   5  17 6569.26 335.013   3
  -5  12 -17 6840.31 283.779   1
   7   5  17 6660.27 304.277   1
   7   5  20 2217.62 166.875   1
   7   5  20 2427.82 174.696   2
   7   5  20 2604.39 207.663   3
   5 -12  20 2333.05 151.065   1
   5 -12  23 287.310 75.5113   1
   7   5  23 329.181 84.2985   1
   7   5  23 351.605 95.6293   2
   7   5  23 341.747 112.726   3
   7   5  26-64.3170 129.532   3
  12  -7 -26 191.466 119.022   3
   7   5  26-4.05387 74.5971   1
  12  -7 -26 133.398 101.789   2
   7   5  26 24.2809 95.3419   2
   5 -12  26 7.64942 86.0598   1
   7   5  29 454.669 144.474   3
  12  -7 -29 447.693 139.496   3
  12  -7 -29 305.890 69.3811   1
  12  -7 -29 502.938 126.887   2
   7   5  29 281.370 72.8663   1
   7   5  29 398.148 113.296   2
  -5  12 -29 200.682 77.0024   2
  12  -7 -32-13.8021 57.9054   1
  12  -7 -32-101.732 145.730   3
  12  -7 -32 126.987 118.733   2
  -5  12 -32-33.3057 85.2393   2
  12  -7 -35 94.7416 130.123   3
  -5  12 -35-72.7068 96.8946   2
  12  -7 -35 81.2717 121.346   2
  12  -7 -38-189.352 164.863   3
  -5  12 -38-99.6606 93.4102   2
   8   4 -38-13.1704 107.082   3
   8   4 -35 116.114 108.707   3
   8   4 -32-6.27781 98.6051   3
   8   4 -32-52.1304 66.2765   1
  12  -8  29 27.1515 74.6948   3
   8   4 -29-2.75997 64.8116   1
  12  -8  29 44.2040 72.7215   1
  12  -8  26 261.759 83.5479   1
   8   4 -26 319.423 75.3627   1
  12  -8  26 420.680 83.8788   3
   4 -12 -23 401.975 92.1780   1
   8   4 -23 550.547 86.7301   1
  12  -8  23 524.611 86.9542   3
   4 -12 -20 7919.85 311.165   1
   4 -12 -20 7555.15 378.321   3
  -4  12  20 8201.33 404.044   3
  -4  12  20 7660.15 305.710   1
   4 -12 -17 30490.3 1005.60   3
   4 -12 -17 32963.1 939.278   1
  -4  12  17 29603.6 925.566   1
   4 -12 -14 36587.1 1063.24   1
  -4  12  14 34772.1 1059.08   1
  -4  12  14 37273.0 1091.66   2
   4 -12 -14 35226.8 1116.82   3
  -4  12  11 37905.4 1130.40   1
  -4  12  11 41105.4 1201.17   3
   4 -12 -11 40802.2 1132.67   1
  -4  12  11 38836.7 1136.08   2
  12  -8  11 37830.0 1028.66   2
   4 -12 -11 36999.8 1166.99   3
   4 -12  -8 26501.7 800.749   1
  -4  12   8 26419.1 800.456   2
   4 -12  -8 24527.3 817.913   3
  -4  12   8 27771.2 854.104   3
  -4  12   8 25065.7 800.884   1
  -4  12   5 34.1081 61.8726   3
  -4  12   5 62.4832 51.8268   1
  -4  12   5 51.9142 53.8252   2
   4 -12  -5-33.8804 59.1551   3
  -4  12   2 286.226 63.9143   1
  -4  12   2 292.583 69.1564   3
  -4  12  -1 6767.72 272.630   3
   4 -12   1 6593.44 275.833   1
  -4  12  -1 6496.44 280.188   1
  -4  12  -4 1934.38 117.495   3
   4 -12   4 2014.23 135.923   1
  -4  12  -7 10336.7 337.837   3
  -4  12  -7 10069.9 383.831   1
   4 -12   7 10611.9 383.265   1
  -4  12 -10 19827.1 652.976   1
   4 -12  10 20903.5 655.332   1
   4 -12  13 29008.3 856.056   1
  -4  12 -13 27041.9 851.299   1
   4 -12  16 23873.0 738.647   1
  -4  12 -16 23282.6 733.574   1
   8   4  19 11074.0 468.380   3
   8   4  19 12038.6 445.470   2
  -4  12 -19 10655.7 400.666   1
   4 -12  19 11773.4 412.993   1
   4 -12  22-28.1132 69.7354   1
   8   4  22 5.03185 77.2013   1
  12  -8 -22-26.1913 101.487   2
   8   4  22 65.0998 92.3035   3
   8   4  25 1034.87 155.938   3
   8   4  25 842.071 109.236   1
  12  -8 -25 997.631 160.479   3
  12  -8 -25 639.592 136.093   2
  12  -8 -25 830.747 95.8337   1
   8   4  25 588.604 120.851   2
  12  -8 -28 45.7503 111.241   2
  12  -8 -28 137.071 61.1611   1
  12  -8 -28 17.9739 111.811   3
   8   4  28-49.7740 78.2457   1
   8   4  28 189.638 121.195   3
   8   4  28-37.0600 106.967   2
  12  -8 -31 191.240 58.5763   1
  12  -8 -31 176.709 127.286   3
  -4  12 -31 135.890 77.0817   2
   8   4  31 229.584 63.0805   1
  12  -8 -31 165.623 113.358   2
  12  -8 -34 9.63162 125.919   3
  12  -8 -34-62.0680 125.882   2
  -4  12 -34-60.4563 80.9740   2
  12  -8 -37-28.8596 138.735   3
  -4  12 -37-5.00257 84.7474   2
   9   3 -39 136.303 127.251   3
   9   3 -36 105.452 120.787   3
   9   3 -33 253.706 120.194   3
   9   3 -33 251.403 74.6823   1
  12  -9  30 292.879 80.9671   1
   9   3 -30 384.270 76.8803   1
  12  -9  27 1191.11 120.312   1
  12  -9  27 1212.47 103.430   3
   9   3 -27 1255.38 112.172   1
  -3  12  24 5954.27 362.247   3
  -3  12  24 5580.06 250.145   1
  -3  12  24 6047.99 321.455   2
  12  -9  24 6770.46 269.901   1
   9   3 -24 6498.85 260.445   1
  12  -9  24 5799.05 240.530   3
  -3  12  21 1246.69 114.608   1
  -3  12  21 1557.73 188.833   3
  12  -9  21 1745.30 131.971   1
  12  -9  21 1326.45 103.010   3
  -3  12  18 2196.40 202.121   3
  -3  12  18 2078.35 147.020   1
   3 -12 -18 2162.40 151.364   1
   3 -12 -15 75.9103 67.6899   1
  -3  12  15-4.06596 71.9160   1
   3 -12 -12 2451.02 155.555   1
  -3  12  12 2454.09 167.510   2
  -3  12  12 2170.62 150.422   1
  -3  12   9 80.6159 72.8050   3
  -3  12   9 152.227 64.7027   1
   3 -12  -9 99.3906 65.2972   1
  -3  12   9 95.2979 65.7724   2
  -3  12   6 7293.42 320.509   3
   3 -12  -6 7197.90 295.524   1
  -3  12   6 6746.86 297.438   1
  -3  12   3 29066.8 862.552   3
  -3  12   3 25762.0 847.798   1
  -3  12   0 48904.3 1386.16   3
   3 -12   0 48650.1 1385.54   1
  -3  12   0 46354.3 1395.27   1
   3 -12   3 59894.0 1745.55   1
  -3  12  -3 63512.3 1728.06   3
   3 -12   6 10516.3 398.522   1
  -3  12  -6 11189.9 368.135   3
   3 -12   9 1359.46 115.384   1
  -3  12  -9 1146.00 79.3347   3
  -3  12  -9 1083.04 110.494   1
   3 -12  12 1864.83 136.244   1
  -3  12 -12 1596.65 128.296   1
  -3  12 -15 510.000 83.3892   1
  12  -9 -15 465.589 104.034   2
   3 -12  18 96.6434 69.3656   1
  -3  12 -18-3.95803 70.1862   1
  12  -9 -18 11.3784 94.7445   2
   9   3  21 523.014 121.474   3
   9   3  21 580.020 106.433   2
  12  -9 -21 409.821 111.716   2
  -3  12 -21 532.067 90.4590   1
  12  -9 -21 302.118 79.6586   1
   3 -12  21 762.275 99.0779   1
  12  -9 -24 8.64238 119.217   3
  -3  12 -24-111.478 92.3595   1
   9   3  24-76.4556 108.108   2
  12  -9 -24-62.2808 80.4300   1
  12  -9 -24-47.7107 126.910   2
   9   3  24-7.43589 112.127   3
  12  -9 -27 1028.42 101.413   1
  12  -9 -27 885.584 164.670   3
   9   3  27 1009.02 138.711   2
   9   3  27 994.268 159.820   3
  12  -9 -27 889.039 154.791   2
   9   3  27 965.612 112.853   1
   9   3  30 1218.65 175.015   3
   9   3  30 951.242 99.0395   1
  12  -9 -30 1115.47 179.167   3
  12  -9 -30 1214.53 97.1364   1
  12  -9 -30 992.213 164.701   2
   9   3  30 971.384 142.247   2
  12  -9 -33 246.588 65.1879   1
  12  -9 -33 116.599 127.767   3
  12  -9 -33 301.542 136.771   2
  -3  12 -36 143.367 95.5692   2
  12  -9 -36-58.6803 140.509   3
  -3  12 -39 54.3132 99.4722   2
  10   2 -40 687.361 180.122   3
  10   2 -37 1113.87 204.596   3
  10   2 -34 2829.96 245.296   3
  10   2 -34 2635.48 148.825   1
  10   2 -31 5768.71 237.922   1
  12 -10  28 2440.64 136.376   3
  12 -10  28 2350.73 162.595   1
  10   2 -28 2813.23 166.064   1
  12 -10  25 2262.91 124.840   3
  -2  12  25 2280.57 148.481   1
  -2  12  25 2073.04 197.598   2
  12 -10  25 2478.39 160.199   1
  -2  12  22 5673.37 341.302   3
  -2  12  22 5234.50 247.813   1
  -2  12  22 5702.87 304.786   2
  12 -10  22 5024.54 209.415   3
  -2  12  19 3844.47 277.654   3
  -2  12  19 3455.25 199.666   1
  -2  12  16 15089.6 537.286   1
   2 -12 -16 16561.2 542.631   1
   2 -12 -13 61161.7 1680.05   1
  -2  12  13 56548.0 1677.69   1
   2 -12 -10 104450. 2858.84   1
  -2  12  10 108698. 2926.42   3
  -2  12  10 105023. 2864.77   2
  -2  12  10 98863.2 2860.70   1
  -2  12   7 137824. 3630.45   3
   2 -12  -7 129776. 3586.41   1
  -2  12   7 128930. 3597.46   1
  -2  12   4 148132. 3791.39   3
  12 -10   4 136969. 3657.38   2
  -2  12   4 135898. 3774.43   1
  -2  12   1 145206. 3705.95   3
  -2  12   1 133443. 3704.01   1
   2 -12  -1 131543. 3689.84   1
  12 -10   1 134735. 3611.27   2
   2 -12   2 86450.6 2399.16   1
  -2  12  -2 79215.6 2397.27   1
  12 -10  -2 85594.4 2337.91   2
  -2  12  -5 61521.2 1659.76   3
   2 -12   5 56875.2 1683.86   1
  12 -10  -5 58822.0 1648.42   2
   2 -12   8 48132.7 1411.35   1
  12 -10  -8 48030.0 1393.84   2
  -2  12  -8 45522.0 1408.82   1
  -2  12 -11 57286.2 1558.82   3
  -2  12 -11 55400.8 1623.13   1
   2 -12  11 57700.8 1628.08   1
  12 -10 -11 56666.7 1624.39   2
  -2  12 -14 46117.0 1372.86   1
   2 -12  14 48894.9 1386.69   1
  12 -10 -14 47930.5 1398.19   2
  12 -10 -17 35784.4 1062.85   1
  -2  12 -17 35734.1 1069.56   1
  12 -10 -17 35019.1 1107.25   2
   2 -12  17 37902.4 1088.27   1
  12 -10 -20 26778.7 812.477   1
  -2  12 -20 27116.3 815.776   1
  10   2  20 25658.4 840.829   2
  12 -10 -20 25946.6 870.361   2
  10   2  23 8399.82 362.309   2
  12 -10 -23 8542.16 327.257   1
  12 -10 -23 8237.74 391.410   2
  -2  12 -23 8390.10 330.420   1
  10   2  23 8290.40 400.798   3
  10   2  26 4026.75 278.603   3
  12 -10 -26 3994.03 298.041   3
  -2  12 -26 3672.70 200.265   1
  10   2  26 4082.48 240.362   2
  12 -10 -26 3492.19 259.503   2
  12 -10 -26 3942.35 195.392   1
  10   2  29 2357.05 164.178   1
  12 -10 -29 2718.75 152.246   1
  10   2  29 2751.52 238.734   3
  12 -10 -29 2574.48 231.292   2
  10   2  29 2729.46 203.739   2
  12 -10 -29 2791.60 253.966   3
  12 -10 -32 916.737 187.940   3
  10   2  32 1084.56 161.275   2
  12 -10 -32 1021.15 179.084   2
  12 -10 -32 738.349 93.8353   1
  12 -10 -35 948.871 202.337   3
  -2  12 -38 810.359 149.182   2
  11   1 -41 529.500 181.270   3
  11   1 -38 533.489 188.094   3
  11   1 -35 1952.26 224.435   3
  11   1 -32 4734.40 221.535   1
  12 -11  29 7703.53 308.446   1
  11   1 -29 8007.12 313.006   1
  12 -11  26 4048.64 211.016   1
  -1  12  26 3795.86 200.350   1
  -1  12  23 5567.75 349.068   3
  -1  12  23 5165.75 242.233   1
  -1  12  23 5232.48 295.530   2
  12 -11  23 5928.29 252.708   1
  -1  12  20 5627.89 328.701   3
  12 -11  20 5882.24 253.511   1
  -1  12  20 5322.67 283.051   2
  -1  12  20 4525.40 234.616   1
  12 -11  20 4319.32 180.204   3
  12 -11  17 4174.41 209.987   1
  -1  12  17 3388.65 203.667   1
  -1  12  14 28564.2 942.734   1
  12 -11  14 32956.8 943.808   1
  -1  12  11 74090.1 2162.79   3
  -1  12  11 72038.8 2115.61   1
   1 -12 -11 74033.0 2104.36   1
  12 -11  11 79281.1 2105.07   1
  -1  12   8 99830.8 2704.51   3
   1 -12  -8 95440.4 2653.36   1
  -1  12   8 93013.0 2666.36   1
  -1  12   5 95399.6 2732.69   1
  -1  12   5 101436. 2751.22   3
  12 -11   2 114309. 3095.79   2
  -1  12   2 115114. 3209.70   1
   1 -12   1 88439.6 2425.36   1
  12 -11  -1 84837.4 2344.91   2
  -1  12  -1 82462.0 2427.48   1
  12 -11  -4 76116.7 2109.85   2
   1 -12   4 74195.7 2162.65   1
  -1  12  -4 81071.1 2149.68   3
  -1  12  -7 59250.6 1739.92   1
  12 -11  -7 60814.9 1704.79   2
  -1  12  -7 63025.9 1704.69   3
   1 -12   7 59731.6 1737.80   1
  -1  12 -10 27283.4 886.589   1
  12 -11 -10 29007.9 882.580   2
  -1  12 -10 29797.4 846.177   3
   1 -12  10 28649.3 897.130   1
  -1  12 -13 49877.8 1457.54   1
  12 -11 -13 50504.9 1450.63   1
  12 -11 -13 50014.2 1469.89   2
  -1  12 -13 51079.3 1396.85   3
  12 -11 -16 39316.1 1295.88   3
  12 -11 -16 41041.7 1202.16   1
  12 -11 -16 40715.7 1237.09   2
  -1  12 -16 42339.2 1209.26   1
  12 -11 -19 21970.4 841.678   3
  11   1  19 24350.0 770.185   2
  -1  12 -19 24875.8 751.248   1
  12 -11 -19 24689.6 806.082   2
  12 -11 -19 24432.0 748.269   1
  -1  12 -19 23431.5 658.301   3
  12 -11 -22 26780.7 814.665   1
  -1  12 -22 27513.9 818.202   1
  11   1  22 26375.3 842.840   2
  12 -11 -22 25744.3 886.563   2
  11   1  22 25327.6 892.277   3
  -1  12 -25 7420.28 303.750   1
  11   1  25 6954.86 325.157   2
  12 -11 -25 6902.68 365.736   2
  12 -11 -25 7403.78 296.557   1
  11   1  25 7601.21 387.269   3
  11   1  28 1092.87 175.444   3
  12 -11 -28 749.252 171.062   3
  12 -11 -28 925.102 100.458   1
  -1  12 -28 903.671 112.166   1
  12 -11 -28 984.492 157.101   2
  11   1  28 745.153 126.651   2
  11   1  31 649.702 165.696   3
  12 -11 -31 461.032 172.081   3
  11   1  31 399.640 92.1441   1
  11   1  31 837.772 137.611   2
  12 -11 -31 260.796 86.5963   1
  12 -11 -31 483.335 144.606   2
  12 -11 -34 651.825 186.696   3
  12 -11 -34 713.365 178.421   2
  -1  12 -37 510.349 134.437   2
  -1  12 -40 661.349 145.569   2
  12   0 -39 59.9545 138.002   3
  12   0 -36 33.3198 126.486   3
  12   0 -33 183.781 91.0363   1
  12   0 -33 499.836 142.080   3
   0  12  30 121.702 75.3014   1
   0  12  27 432.062 90.9763   1
  12 -12  27 337.675 88.9524   1
   0  12  24 101.237 125.387   3
   0  12  24 202.571 81.0928   1
   0  12  24 54.9188 115.055   2
  12 -12  24 201.910 84.4665   1
   0  12  21 3346.63 259.352   3
  12 -12  21 2628.92 102.225   3
  12 -12  21 3390.26 189.200   1
   0  12  21 2852.37 185.045   1
   0  12  21 3431.85 229.332   2
   0  12  18 1061.88 161.495   3
   0  12  18 932.758 115.618   1
  12 -12  18 956.198 111.977   1
   0  12  18 902.154 131.537   2
   0  12  15 2431.36 175.064   1
  12 -12  15 2930.72 174.623   1
   0  12  12 2737.65 186.210   1
  12 -12  12 2913.54 175.643   1
   0  12   9 330.554 95.1233   3
   0  12   9 316.721 81.8065   1
  12 -12   9 247.535 71.0234   1
  12 -12   6 1314.37 116.390   1
   0  12   6 1227.19 129.086   1
   0  12   6 1319.91 142.609   3
  12 -12   3 708.799 90.6425   1
   0  12   3 508.594 93.7771   1
  12 -12   0 2502.25 121.632   2
   0  12   0 2724.39 182.735   1
  12 -12   0 3026.28 174.760   1
   0  12   0 3084.26 189.065   3
  12 -12  -3 24870.8 750.381   2
   0  12  -3 26768.7 808.780   3
  12 -12  -6 27731.6 858.051   1
  12 -12  -6 27721.9 827.673   2
   0  12  -6 27649.8 845.822   3
  12 -12  -9 40326.8 1205.08   2
  12 -12  -9 42504.0 1221.75   1
   0  12  -9 41586.8 1232.47   1
  12 -12 -12 11706.1 502.934   3
   0  12 -12 13119.4 459.952   1
  12 -12 -12 12507.4 447.754   1
  12 -12 -12 11951.0 452.474   2
  12 -12 -15 128.707 97.6111   3
   0  12 -15 184.925 77.6699   1
  12 -12 -15 190.610 78.0073   2
  12 -12 -15 8.41833 68.7195   1
  12 -12 -18-32.1904 111.940   3
   0  12 -18 70.2850 68.6517   1
  12 -12 -18 28.6730 97.6941   2
  12 -12 -18 4.14592 86.0219   1
  12 -12 -21 2104.54 222.943   3
  12   0  21 2366.00 161.544   2
   0  12 -21 2307.37 156.547   1
  12 -12 -21 2057.68 187.503   2
  12 -12 -21 2218.55 156.944   1
   0  12 -24 298.819 88.6683   1
  12 -12 -24 194.176 115.881   2
  12   0  24 429.693 93.5179   2
  12 -12 -24 385.082 91.9729   1
   0  12 -24 427.667 42.6439   3
  12   0  27 226.801 115.997   3
   0  12 -27 234.962 83.0534   1
  12 -12 -27 286.422 113.435   2
  12 -12 -27 185.601 80.0699   1
  12   0  27 370.764 93.7851   2
  12 -12 -30 1183.79 195.805   3
  12   0  30 1151.44 180.101   3
   0  12 -30 1324.06 121.877   1
  12   0  30 1500.92 150.434   2
  12 -12 -30 1203.18 112.570   1
  12 -12 -30 1412.55 183.915   2
  12 -12 -33 786.770 187.250   3
  12 -12 -33 1253.84 181.749   2
   0  12 -39 56.0979 113.879   2
  12 -13 -32 496.292 163.169   3
  12 -13 -32 669.087 147.399   2
   1  12 -32 733.351 92.2954   1
  12 -13 -32 514.073 83.9443   1
  13  -1  29 366.093 135.791   3
  12 -13 -29 204.899 144.149   3
   1  12 -29 260.895 36.7539   3
  13  -1  29 320.520 99.2963   2
  12 -13 -29 313.441 123.962   2
   1  12 -29 400.533 84.5668   1
  12 -13 -29 306.684 81.2965   1
  13  -1  26 113.539 114.300   3
   1  12 -26 267.344 49.1430   3
   1  12 -26 231.786 81.2922   1
  12 -13 -26 180.432 79.7513   1
  12 -13 -26 379.463 120.042   2
  13  -1  26 240.055 95.5230   2
  12 -13 -23 9008.92 423.002   2
  12 -13 -23 9439.82 362.159   1
   1  12 -23 9912.69 366.328   1
  13  -1  23 9111.22 373.490   2
  12 -13 -23 8277.18 457.419   3
   1  12 -20 16762.9 560.467   1
  12 -13 -20 15826.1 661.952   3
  13  -1  20 16089.8 560.796   2
  12 -13 -20 17133.2 615.170   2
  12 -13 -20 16942.9 564.370   1
  12 -13 -17 15410.4 627.789   3
  12 -13 -17 15725.8 577.248   2
  12 -13 -17 16270.1 544.103   1
   1  12 -17 15686.4 539.066   1
  12 -13 -14 6395.94 286.259   1
  12 -13 -14 6429.76 345.841   3
  12 -13 -14 6757.69 303.537   2
   1  12 -14 6653.43 291.825   1
  12 -13 -11 950.881 133.590   3
  12 -13 -11 1031.14 110.136   2
  12 -13 -11 998.197 108.392   1
   1  12 -11 947.239 107.292   1
  12 -13  -8 282.809 89.4631   3
  12 -13  -8 350.198 69.0867   2
   1  12  -8 390.719 80.3833   1
  12 -13  -8 311.067 72.0362   1
  12 -13  -5 776.094 80.8891   2
  12 -13   1 18675.7 627.978   1
   1  12   1 18196.7 646.407   1
   1  12   1 19790.7 660.187   3
   1  12   4 17980.0 650.509   1
   1  12   4 19990.8 676.089   3
  12 -13   4 19072.8 631.494   1
   1  12   7 10005.3 425.287   1
  12 -13   7 10923.0 405.645   1
   1  12   7 10879.2 449.432   3
  12 -13  10 5946.31 266.813   1
   1  12  10 5270.58 280.017   1
   1  12  10 5323.41 299.032   3
  12 -13  13 4023.42 213.222   1
   1  12  13 3690.96 228.660   1
   1  12  16 105.660 77.0751   1
  12 -13  16 169.307 71.3869   1
   1  12  16 17.7843 91.6120   2
   1  12  19 2608.34 229.392   3
   1  12  19 2514.47 198.107   2
  12 -13  19 2660.33 170.610   1
   1  12  22 3619.69 218.608   1
   1  12  22 4433.45 303.894   3
  12 -13  22 4267.00 223.303   1
   1  12  22 3851.40 255.701   2
  12 -13  25 939.388 117.068   1
   1  12  25 825.375 114.495   1
   1  12  28 2419.09 167.240   1
  12 -13  28 3006.74 179.215   1
   1  12  31 557.661 90.7501   1
  13  -1 -34-132.227 94.8569   1
  13  -1 -34-183.495 148.490   3
  13  -1 -37-97.5706 146.871   3
   2  11 -33 1096.83 107.421   1
  11 -13 -33 796.992 159.958   2
  13  -2  33 818.444 160.249   3
  11 -13 -33 806.551 177.551   3
  11 -13 -30 572.285 166.042   3
  13  -2  30 292.763 132.112   3
   2  11 -30 407.436 64.5174   3
  11 -13 -30 475.386 146.113   2
  13  -2  30 483.054 108.437   2
  11 -13 -30 325.633 85.2852   1
   2  11 -30 288.358 87.2481   1
  11 -13 -27 2359.90 215.089   2
   2  11 -27 2099.77 154.315   1
  13  -2  27 2407.39 177.315   2
  11 -13 -27 1860.14 144.683   1
   2  11 -27 1857.48 123.028   3
  13  -2  27 2358.61 211.826   3
  11 -13 -24 3942.42 212.354   1
   2  11 -24 3799.91 207.205   1
  11 -13 -24 3932.68 267.732   2
  13  -2  24 4037.64 226.052   2
  13  -2  24 4674.78 283.341   3
  11 -13 -21 12312.4 545.873   3
  11 -13 -21 12423.3 499.475   2
  13  -2  21 12202.5 444.497   2
  11 -13 -21 11898.9 438.802   1
   2  11 -21 12819.6 441.029   1
  11 -13 -18 12616.4 544.168   3
  11 -13 -18 12947.4 501.359   2
  11 -13 -18 13063.2 460.021   1
   2  11 -18 12992.4 457.144   1
  11 -13 -15 17748.5 688.521   3
  11 -13 -15 19046.5 639.213   2
   2  11 -15 18379.1 609.450   1
  11 -13 -15 18984.6 616.580   1
  11 -13 -12 18555.7 686.152   3
  11 -13 -12 18686.1 629.355   2
   2  11 -12 19606.5 628.731   1
  11 -13 -12 18999.2 624.222   1
  11 -13  -9 15354.9 512.986   1
  11 -13  -9 14210.7 553.303   3
  11 -13  -9 14138.0 494.170   2
   2  11  -9 14580.3 512.487   1
  11 -13  -6 27676.3 914.293   3
  11 -13  -6 28617.3 850.025   2
  11 -13  -6 29213.2 883.602   1
  11 -13  -3 17093.1 595.556   3
  11 -13   0 12001.6 452.549   3
   2  11   0 12353.0 466.575   1
  11 -13   0 13152.9 457.276   1
  11 -13   3 21232.3 673.486   1
   2  11   3 20395.2 695.215   1
   2  11   3 21462.8 710.704   3
  11 -13   3 20002.9 655.100   3
  11 -13   6 6191.22 271.005   1
   2  11   6 5753.72 286.167   1
   2  11   6 6140.61 306.745   3
  11 -13   9 7518.16 308.187   1
  11 -13   9 7209.00 265.121   3
   2  11   9 7239.55 331.776   1
   2  11   9 7551.45 360.476   3
  11 -13  12 13781.1 428.975   3
   2  11  12 14443.8 532.751   1
  11 -13  12 15018.5 502.755   1
   2  11  15 8347.40 357.307   2
   2  11  15 8109.41 348.962   1
  11 -13  15 9007.51 333.614   1
  11 -13  18 7628.75 316.857   1
   2  11  18 7303.39 336.590   1
   2  11  18 7322.31 388.837   3
   2  11  18 7550.31 351.895   2
   2  11  21 12754.8 554.743   3
  11 -13  21 13170.5 457.760   1
   2  11  21 11887.6 466.942   1
   2  11  21 12769.5 505.969   2
  11 -13  24 3804.83 209.664   1
   2  11  24 3933.66 292.650   3
   2  11  24 3288.85 203.022   1
   2  11  24 3972.10 257.571   2
   2  11  27-80.1274 82.8106   1
   2  11  30 338.768 77.2806   1
  13  -2 -33-115.107 146.188   3
  13  -2 -36-35.7103 151.242   3
  10 -13 -34 316.828 162.232   3
   3  10 -34 352.775 79.0943   1
  10 -13 -34 270.899 152.296   2
   3  10 -34 165.755 76.1629   3
   3  10 -31 1295.12 117.088   3
  10 -13 -31 1423.92 203.320   2
  10 -13 -31 1389.36 121.485   1
  10 -13 -31 1418.08 211.423   3
   3  10 -31 1592.75 127.494   1
  13  -3  31 1478.01 185.384   3
  10 -13 -28 4756.52 304.401   2
   3  10 -28 5209.27 228.288   1
  10 -13 -28 4689.71 219.917   1
  13  -3  28 5028.78 294.948   3
  13  -3  28 5016.24 253.890   2
   3  10 -28 4555.06 217.864   3
   3  10 -25 6641.87 272.321   1
  10 -13 -25 6734.72 349.573   2
  10 -13 -25 6580.09 274.538   1
  13  -3  25 6091.02 283.204   2
  13  -3  25 6477.93 333.053   3
  10 -13 -22 5373.79 301.141   2
  13  -3  22 5468.66 245.492   2
   3  10 -22 5495.90 242.377   1
  10 -13 -22 4863.86 324.238   3
  10 -13 -22 5197.44 243.748   1
  10 -13 -19 3324.18 250.196   3
  10 -13 -19 3312.60 188.151   1
  10 -13 -19 3442.01 226.448   2
  13  -3  19 3751.98 186.339   2
   3  10 -19 3310.08 183.883   1
  10 -13 -16 4417.23 273.589   3
  10 -13 -16 4188.42 218.153   1
  10 -13 -16 4208.15 236.870   2
   3  10 -16 4414.41 214.890   1
  10 -13 -13 6429.12 327.647   3
  10 -13 -13 6160.88 281.743   2
   3  10 -13 6127.72 270.338   1
  10 -13 -13 6219.36 271.319   1
  10 -13 -10 21918.0 683.028   2
   3  10 -10 21058.3 682.514   1
  10 -13 -10 20092.1 727.705   3
  10 -13 -10 21646.4 685.019   1
  10 -13  -7 54103.5 1623.40   3
   3  10  -7 56409.2 1593.37   1
  10 -13  -7 55720.3 1583.90   1
  10 -13  -4 55677.9 1612.81   3
  10 -13  -1 46447.9 1328.10   1
  10 -13  -1 44143.9 1329.42   3
   3  10  -1 46703.7 1346.03   1
  10 -13   2 16780.9 565.352   3
   3  10   2 17528.2 601.033   1
  10 -13   2 18520.6 587.036   1
  10 -13   5 1332.24 94.5529   3
   3  10   5 1104.92 119.377   1
  10 -13   5 1131.28 107.174   1
   3  10   8 307.159 89.1961   3
  10 -13   8 261.237 45.5434   3
  10 -13   8 277.566 63.2052   1
   3  10   8 202.836 69.4514   1
  10 -13  11 4589.38 169.740   3
   3  10  11 4927.01 258.058   1
  10 -13  11 5161.41 236.185   1
   3  10  14 11411.0 459.489   1
  10 -13  14 12609.5 438.741   1
   3  10  14 12188.9 507.024   3
  10 -13  17 13821.2 482.271   1
   3  10  17 13816.3 527.829   2
   3  10  17 13578.5 510.460   1
   3  10  17 14300.8 570.103   3
   3  10  20 15917.6 630.211   3
  10 -13  20 16109.0 534.742   1
   3  10  20 15594.9 584.501   2
   3  10  20 14779.5 549.766   1
   3  10  23 3674.68 275.705   3
   3  10  23 3322.28 205.032   1
   3  10  23 3678.21 242.913   2
  10 -13  23 3791.40 203.468   1
   3  10  26 390.348 90.7778   1
  10 -13  26 529.483 97.9002   1
  10 -13  29 234.299 76.2082   1
   3  10  29 314.069 76.4602   1
  13  -3 -32 662.893 171.120   3
  13  -3 -35 243.782 153.090   3
   4   9 -35-30.4840 73.7466   3
   9 -13 -35-10.3398 141.406   3
   9 -13 -32-127.619 143.758   3
   4   9 -32-33.4369 77.9546   3
   4   9 -32-49.7003 70.2491   1
   9 -13 -32-22.8593 77.9955   1
  13  -4  32-66.1434 112.058   3
  13  -4  29 51.5204 109.099   3
   4   9 -29-35.1840 85.9773   3
   9 -13 -29-35.1364 77.4874   1
   9 -13 -29-69.8376 130.342   2
   4   9 -29 35.3666 75.6079   1
   9 -13 -29 129.688 133.594   3
   4   9 -26 810.339 101.300   1
   9 -13 -26 759.684 151.012   2
  13  -4  26 800.563 113.636   2
   9 -13 -26 756.731 102.296   1
  13  -4  26 935.329 137.854   3
   9 -13 -23 2004.33 216.179   3
   9 -13 -23 1775.48 185.019   2
   9 -13 -23 1942.01 140.967   1
  13  -4  23 2048.85 141.280   2
   4   9 -23 1804.23 133.400   1
   9 -13 -20 5565.75 297.674   2
   9 -13 -20 5327.19 319.966   3
   4   9 -20 5933.71 250.939   1
  13  -4  20 5777.88 243.354   2
   9 -13 -20 5684.92 254.787   1
   9 -13 -17 2881.62 167.762   1
   9 -13 -17 2580.33 186.805   2
  13  -4  17 2728.72 148.528   2
   4   9 -17 2782.52 161.405   1
   9 -13 -17 2567.10 211.364   3
   9 -13 -14 2289.37 187.978   3
   9 -13 -14 2399.49 154.929   1
   4   9 -14 2337.85 148.735   1
   9 -13 -11 8774.52 397.207   3
   9 -13 -11 9729.01 362.303   1
   4   9 -11 9608.92 360.386   1
   9 -13  -8 15079.9 553.357   3
   4   9  -8 14826.4 515.859   1
   9 -13  -8 15850.2 522.190   1
   9 -13  -5 3783.08 208.338   3
  -9  13   5 3678.32 172.472   2
   9 -13  -2 46.5805 51.5810   3
  -9  13   2 27.6440 39.7377   2
   9 -13   1 116.255 50.7224   1
   9 -13   1 115.373 50.0166   3
   4   9   1 36.5216 50.2770   1
  -9  13  -1 129.318 35.0222   2
   9 -13   4 1852.77 116.288   3
   4   9   4 2066.55 148.998   1
   9 -13   4 2016.49 135.939   1
  -9  13  -4 1930.94 90.8141   2
   9 -13   7 412.044 50.1092   3
   4   9   7 547.801 85.1170   1
   9 -13   7 390.937 70.5454   1
   9 -13  10 1182.35 108.582   1
  -9  13 -10 1215.19 48.3385   2
   9 -13  10 1092.06 63.9755   3
   4   9  13 4254.27 263.004   3
   4   9  13 4088.18 234.346   1
   9 -13  13 4404.29 216.851   1
   9 -13  16 6753.09 264.473   1
   4   9  16 5881.13 280.816   1
   4   9  16 6418.92 328.853   3
   9 -13  19 1681.28 130.812   1
   4   9  19 1153.55 150.097   2
   4   9  19 1224.72 130.661   1
  -9  13 -19 1305.44 64.3824   2
   4   9  19 1517.06 182.107   3
   4   9  22 1738.95 189.405   3
  -9  13 -22 1389.41 80.4138   2
   4   9  22 1548.72 168.337   2
   4   9  22 1314.88 133.813   1
   9 -13  22 1740.86 136.519   1
   4   9  25-57.4990 78.0276   1
   4   9  25-60.3836 123.440   3
   9 -13  25-3.95625 73.6647   1
   4   9  28 272.760 78.5757   1
  -9  13 -28 101.328 68.8139   2
   9 -13  28 300.827 82.2538   1
   4   9  31 393.596 78.0089   1
  13  -4 -31 9.04114 146.774   3
  13  -4 -34-118.945 164.739   3
   5   8 -33-32.2949 67.5213   1
   5   8 -33-160.101 109.521   3
   8 -13 -33-109.818 148.932   3
   8 -13 -30 1729.37 128.276   1
   5   8 -30 2023.24 130.776   1
   5   8 -30 1641.18 152.546   3
   8 -13 -30 1724.58 211.350   3
  13  -5  30 1662.61 171.723   3
   8 -13 -27 1666.83 130.729   1
   5   8 -27 1829.41 125.724   1
  13  -5  27 1438.20 161.877   3
   8 -13 -24 3572.48 188.020   1
   5   8 -24 3579.90 180.108   1
  13  -5  24 3400.22 182.253   2
  13  -5  24 3356.17 218.174   3
   5   8 -21 3301.46 176.373   1
   8 -13 -21 3534.88 187.462   1
  13  -5  21 3764.64 178.397   2
   8 -13 -18 2579.21 211.062   3
   5   8 -18 2626.97 153.089   1
  13  -5  18 2424.97 135.976   2
   8 -13 -18 2444.11 153.315   1
   8 -13 -15 9298.58 417.497   3
   5   8 -15 9524.07 350.986   1
   8 -13 -15 9519.67 359.158   1
   8 -13 -12 18190.2 585.510   1
   8 -13 -12 17332.2 631.397   3
   5   8 -12 17716.2 578.115   1
  -8  13  12 17686.7 589.919   2
   8 -13  -9 3516.12 212.738   3
   8 -13  -9 3837.18 194.375   1
  -8  13   9 3908.39 190.300   2
   5   8  -9 3575.20 189.784   1
   8 -13  -6 2437.68 168.058   3
  -8  13   6 2900.58 153.676   2
   8 -13  -3 11795.0 434.449   3
  -8  13   3 12493.5 402.965   2
   8 -13   0 71456.8 1964.77   1
   5   8   0 70901.9 1974.52   1
  -8  13   0 70732.4 1912.76   2
   8 -13   0 67702.0 1946.41   3
   5   8   3 39713.0 1184.89   1
   8 -13   3 41282.9 1171.48   1
  -8  13  -3 40537.9 1106.55   2
   8 -13   3 38080.2 1134.33   3
   5   8   6 841.665 99.1259   1
   8 -13   6 868.031 95.8099   1
   8 -13   6 725.109 67.9579   3
  -8  13  -6 837.221 56.8613   2
   5   8   9 1279.98 120.669   1
   8 -13   9 1296.08 109.820   1
   8 -13   9 1091.92 64.9547   3
   5   8  12 10091.2 410.344   1
   8 -13  12 10752.7 392.268   1
   5   8  12 10783.8 444.172   3
   5   8  15 11650.3 457.177   1
   5   8  15 12412.3 502.082   3
   8 -13  15 12314.0 434.832   1
   5   8  18 99.7959 72.1444   1
   5   8  18-5.79842 95.1493   2
   5   8  18 14.5736 93.9060   3
   8 -13  18 16.1930 58.3888   1
   5   8  21 1903.25 156.098   1
   5   8  21 1763.00 172.943   2
   8 -13  21 2167.70 148.978   1
  -8  13 -21 1735.74 93.6195   2
   5   8  21 1999.63 197.590   3
   5   8  24 267.699 125.318   3
   8 -13  24 200.745 77.4017   1
   5   8  24 64.2829 97.7142   2
  -8  13 -24 162.353 50.8133   2
   5   8  24 211.344 79.9064   1
   8 -13  27 1478.10 125.838   1
  -8  13 -27 993.764 92.6732   2
   5   8  27 1361.24 171.491   2
   5   8  27 1275.72 118.688   1
   8 -13  30 746.342 98.5744   1
   5   8  30 683.924 90.5553   1
  -8  13 -30 569.535 81.5713   2
  13  -5 -30 522.855 156.302   3
  13  -5 -33 74.2559 146.419   3
  13  -5 -33 351.938 69.0922   1
  -8  13 -33 220.062 78.8052   2
  13  -5 -33 193.199 141.799   2
  -8  13 -36-38.7047 79.4322   2
  13  -5 -36-104.038 155.201   3
   6   7 -34-66.9388 65.7865   1
   7 -13 -34-149.072 145.006   3
   6   7 -34-159.251 117.624   3
  13  -6  31 64.1485 97.6744   3
   6   7 -31 81.3292 68.6261   1
   6   7 -31 46.0826 104.039   3
   7 -13 -31 57.0006 131.601   3
   7 -13 -28 2542.08 155.344   1
   6   7 -28 2549.86 150.232   1
  13  -6  28 2449.41 186.600   3
   7 -13 -25 207.114 78.6007   1
  13  -6  25 175.485 97.3649   3
   6   7 -25 238.341 70.5563   1
   7 -13 -22 399.269 137.679   3
   6   7 -22 551.693 83.2249   1
   7 -13 -22 515.043 88.1540   1
   7 -13 -19 203.192 109.727   3
   6   7 -19 287.097 68.1536   1
   7 -13 -19 223.250 70.9326   1
  13  -6  19 441.880 61.3274   2
   6   7 -16 7375.82 293.674   1
  13  -6  16 7397.41 262.101   2
   7 -13 -16 7789.09 306.648   1
  -7  13  16 7695.88 331.612   2
   7 -13 -16 7374.86 359.673   3
   6   7 -13 4944.79 223.128   1
   7 -13 -13 4661.57 222.867   1
  -7  13  13 4803.59 235.311   2
   7 -13 -13 4825.06 265.604   3
   7 -13 -10 38.0212 56.0515   3
   6   7 -10 15.1709 47.2109   1
   7 -13 -10 90.4824 49.4748   1
  -7  13  10 102.377 53.8715   2
   6   7  -7 917.514 95.8359   1
  -7  13   7 964.794 100.847   1
  -7  13   7 1015.28 93.6513   2
   7 -13  -7 922.494 95.7912   1
   7 -13  -7 870.220 103.103   3
  -7  13   4 20512.4 614.220   2
  -7  13   4 20024.0 647.715   1
   7 -13  -4 18861.1 640.296   3
   7 -13  -1 45417.3 1257.25   1
   7 -13  -1 41298.8 1239.96   3
  -7  13   1 42689.2 1262.82   1
  -7  13   1 43181.3 1212.58   2
   7 -13   2 22793.2 694.666   1
  -7  13  -2 22565.0 643.590   2
  -7  13  -2 20932.8 694.140   1
   7 -13   2 20798.6 661.192   3
   7 -13   5 3811.56 165.828   3
   6   7   5 3924.51 206.746   1
   7 -13   5 4239.05 204.916   1
   7 -13   8 624.404 85.8811   1
   6   7   8 732.276 92.6774   1
   7 -13  11 4627.23 220.671   1
   6   7  11 4287.48 230.282   1
   6   7  14 5179.24 265.592   1
   7 -13  14 5614.23 246.443   1
   6   7  14 5487.47 296.676   3
   6   7  17 3159.55 227.446   3
   7 -13  17 3531.53 187.340   1
   6   7  17 3083.11 197.065   1
   6   7  20 922.720 117.741   1
   7 -13  20 1114.08 109.419   1
   6   7  20 716.172 130.366   2
   6   7  20 930.660 144.853   3
   7 -13  23 1848.23 137.154   1
   6   7  23 1574.00 140.380   1
   6   7  23 1497.87 163.567   2
   6   7  23 1891.64 196.031   3
   6   7  26-25.6407 148.015   3
   7 -13  26 210.753 76.2541   1
   6   7  26 137.419 73.3733   1
   6   7  26-79.1797 128.989   2
  -7  13 -26-27.8607 66.3874   2
   7 -13  29 804.384 101.377   1
  13  -6 -29 722.121 161.396   3
  -7  13 -29 602.273 89.1269   2
   6   7  29 701.885 90.7937   1
  13  -6 -29 832.736 154.048   2
  13  -6 -32-65.9242 148.398   3
  -7  13 -32-3.45690 66.5689   2
  13  -6 -32 47.3876 57.2911   1
  13  -6 -32-123.956 126.196   2
  13  -6 -35 403.143 167.131   3
  -7  13 -35 496.543 92.2218   2
   7   6 -35 352.485 110.007   3
   6 -13 -35 109.956 128.979   3
   7   6 -32-42.0866 78.4593   1
   7   6 -32 97.1287 91.1902   3
   6 -13 -32 38.0496 127.826   3
  13  -7  29 177.555 83.9943   3
  13  -7  29-13.6760 85.2968   1
   7   6 -29-11.9406 70.9170   1
   6 -13 -29-9.04949 128.985   3
   6 -13 -26 543.313 98.3123   1
   7   6 -26 574.224 91.6033   1
  13  -7  26 537.806 107.044   3
   6 -13 -23 11805.7 418.729   1
   7   6 -23 11555.9 400.962   1
   6 -13 -23 11328.1 514.288   3
   6 -13 -20 13374.7 565.438   3
   6 -13 -20 14461.4 485.890   1
   7   6 -20 14125.7 472.773   1
   6 -13 -17 9518.91 363.648   1
   7   6 -17 10023.2 361.448   1
   6 -13 -17 9366.61 428.606   3
  13  -7  17 9858.57 317.829   2
  -6  13  17 10187.6 400.335   2
   6 -13 -14 5972.83 309.819   3
  13  -7  14 6182.49 210.579   2
   6 -13 -14 6303.67 267.281   1
  -6  13  14 5748.37 263.445   1
  -6  13  14 6466.81 287.427   2
   7   6 -14 6135.12 260.756   1
   6 -13 -11 61.8420 59.7382   3
  -6  13  11 46.4511 47.9746   2
  -6  13  11 20.7644 59.9039   1
   6 -13 -11 66.9725 50.5355   1
  -6  13   8 711.233 88.5633   1
  -6  13   8 553.818 76.9871   2
   6 -13  -8 573.517 90.9249   3
   6 -13  -8 683.151 83.5702   1
  -6  13   5 691.793 87.2927   1
  -6  13   5 707.481 80.6392   2
   6 -13  -5 665.776 87.5391   3
  -6  13   2 8060.00 290.186   2
   6 -13  -2 7391.61 304.275   3
  -6  13   2 7793.01 320.924   1
   6 -13   1 31925.9 975.695   3
   6 -13   1 35180.8 1007.01   1
  -6  13  -1 34128.8 1013.71   1
   6 -13   4 25902.6 799.438   1
  -6  13  -7 19226.5 638.565   1
   6 -13   7 19887.7 633.654   1
  -6  13 -10 10346.0 401.154   1
   6 -13  10 11465.9 403.492   1
  -6  13 -13 2723.32 165.090   1
   6 -13  13 2729.44 162.108   1
   7   6  16 227.774 74.2388   1
   7   6  16 113.157 97.2972   3
   6 -13  16 305.237 69.4095   1
   7   6  19 1187.00 127.080   1
   6 -13  19 1126.29 111.792   1
   7   6  19 1292.24 136.031   2
   7   6  19 947.471 143.117   3
   7   6  22 15.5806 74.3164   1
   6 -13  22 28.2517 71.0097   1
   7   6  22-76.4908 120.137   3
   7   6  22-5.96013 91.1296   2
   7   6  25 1209.05 183.665   3
   6 -13  25 1249.41 119.475   1
   7   6  25 1189.91 124.597   1
   7   6  25 975.188 144.342   2
  13  -7 -28 1478.62 199.357   3
   7   6  28 1251.04 118.122   1
   7   6  28 1178.54 157.881   2
  -6  13 -28 1212.44 117.010   2
  13  -7 -28 1344.98 180.806   2
   6 -13  28 1550.87 128.253   1
  13  -7 -31-25.6902 127.276   2
  13  -7 -31-9.50619 141.287   3
  13  -7 -31 96.5906 58.6588   1
  -6  13 -31-59.8188 87.9278   2
   7   6  31 113.499 59.4123   1
  13  -7 -34-174.760 162.217   3
  13  -7 -34-183.091 144.327   2
  13  -7 -37-218.254 162.331   3
  -6  13 -37-90.4225 76.8063   2
   8   5 -36 441.020 125.211   3
   8   5 -33 480.431 85.4181   1
   8   5 -33 579.772 128.974   3
  13  -8  30 131.313 81.3702   1
  13  -8  30 157.797 87.1121   3
   8   5 -30 287.042 79.0507   1
   5 -13 -30 73.3241 135.805   3
   8   5 -27 3892.70 188.408   1
  13  -8  27 3694.87 201.434   1
   8   5 -24 11984.9 409.649   1
   5 -13 -24 12379.4 427.492   1
   5 -13 -21 30272.5 912.282   1
   8   5 -21 31197.1 903.382   1
   5 -13 -18 29649.9 885.866   1
   5 -13 -18 28287.9 960.335   3
   8   5 -18 30849.7 880.346   1
  -5  13  18 26959.5 875.215   1
  -5  13  18 29628.7 926.629   2
   5 -13 -15 36590.0 1202.63   3
   5 -13 -15 39069.1 1143.69   1
  -5  13  15 36056.1 1138.14   1
  -5  13  15 38904.5 1174.81   2
  13  -8  15 40246.2 1060.43   2
   5 -13 -12 23928.7 754.396   1
  -5  13  12 25163.2 828.890   3
  13  -8  12 24221.7 666.555   2
  -5  13  12 25432.1 772.499   2
  -5  13  12 23090.2 752.767   1
   5 -13 -12 22973.8 794.796   3
  -5  13   9 6040.15 294.837   3
   5 -13  -9 5328.66 244.550   1
  -5  13   9 5295.22 249.477   1
  -5  13   9 5442.87 245.127   2
   5 -13  -9 5105.50 261.407   3
  -5  13   6 18979.9 636.661   1
  -5  13   6 19591.9 618.850   2
   5 -13  -6 19610.3 629.002   1
   5 -13  -6 17933.7 634.487   3
  -5  13   3 21746.3 716.209   1
  -5  13   3 22928.3 689.044   2
   5 -13  -3 20721.1 698.559   3
  -5  13   0 21233.9 712.373   1
  -5  13   0 23418.9 710.222   3
   5 -13   0 22213.1 707.112   1
  -5  13  -3 54885.3 1518.17   3
   5 -13   3 52562.2 1535.59   1
   5 -13   6 54379.9 1552.81   1
   5 -13   9 27387.6 826.559   1
  -5  13  -9 26015.2 831.996   1
   5 -13  12 2647.42 160.323   1
  -5  13 -12 2493.59 158.664   1
  -5  13 -15 3524.30 195.901   1
   5 -13  15 4128.74 204.949   1
   8   5  18 1074.20 145.818   3
   5 -13  18 1244.17 114.646   1
  -5  13 -18 897.820 107.935   1
   8   5  21 398.173 97.6505   1
   5 -13  21 499.189 88.7665   1
   8   5  21 519.931 107.005   2
   8   5  21 318.213 114.900   3
   5 -13  24 2548.95 164.691   1
   8   5  24 1970.42 165.698   1
  13  -8 -24 2537.13 231.492   3
   8   5  24 2796.64 201.387   2
  13  -8 -24 2163.88 210.291   2
   8   5  24 2107.52 219.603   3
   8   5  27 1099.16 117.921   1
  13  -8 -27 1375.90 191.843   3
   8   5  27 1212.64 182.055   3
   8   5  27 1538.45 158.074   2
  13  -8 -27 1011.58 168.541   2
  13  -8 -27 1183.60 115.283   1
  13  -8 -30 9.38272 65.2546   1
  13  -8 -30 9.60816 129.113   3
   8   5  30 26.1487 61.2960   1
  13  -8 -30 41.4712 122.819   2
  -5  13 -30-83.7132 86.3460   2
  13  -8 -33-88.3711 142.703   3
  13  -8 -33-134.544 146.743   2
  13  -8 -33-2.48876 56.0049   1
  13  -8 -36-161.526 155.466   3
  -5  13 -36-142.858 92.9694   2
   9   4 -37 90.6602 115.141   3
   9   4 -34 178.924 121.079   3
   9   4 -34-87.3195 84.7335   1
   9   4 -31 1205.12 110.436   1
  13  -9  28 1035.56 105.663   3
  13  -9  28 852.268 119.634   1
   9   4 -28 1102.25 112.221   1
   9   4 -25 757.255 105.963   1
  13  -9  25 1004.10 117.965   1
  13  -9  25 852.803 99.6843   3
   4 -13 -22 2948.01 241.482   3
  -4  13  22 3641.28 270.463   3
  -4  13  22 2789.86 171.891   1
   9   4 -22 3288.08 180.131   1
   4 -13 -22 3339.47 191.155   1
  -4  13  19 5770.21 265.830   1
   4 -13 -19 6219.69 335.437   3
   4 -13 -19 6316.92 276.467   1
   4 -13 -16 1220.55 120.600   1
   4 -13 -16 1261.33 148.598   3
  -4  13  16 1055.96 114.667   1
  -4  13  16 1298.10 131.933   2
  -4  13  13 13290.1 484.760   1
   4 -13 -13 14122.6 485.588   1
   4 -13 -13 13176.3 523.753   3
  -4  13  13 14520.9 559.180   3
  -4  13  13 14302.4 502.924   2
  -4  13  10 21299.1 702.260   1
  -4  13  10 23252.5 760.741   3
   4 -13 -10 22028.2 696.563   1
  -4  13  10 22388.2 705.669   2
   4 -13 -10 20282.0 720.174   3
  -4  13   7 3528.13 217.593   3
  -4  13   7 3550.20 196.803   1
   4 -13  -7 3332.03 187.012   1
  -4  13   7 3661.65 188.688   2
  -4  13   4 18835.3 608.714   3
  -4  13   4 16091.3 578.415   1
   4 -13  -1 8704.47 347.523   1
  -4  13   1 8642.01 356.144   1
  -4  13   1 9530.49 359.593   3
   4 -13   2 81.7281 54.1042   1
  -4  13  -2 169.747 57.5093   3
  -4  13  -2 9.37399 60.1369   1
  -4  13  -5 160.599 50.2197   3
   4 -13   5 134.212 58.3092   1
  -4  13  -8-34.6679 42.4262   3
  -4  13  -8-13.5531 60.9789   1
   4 -13   8 82.2477 55.7842   1
  -4  13 -11 637.989 88.1286   1
   4 -13  11 755.248 93.3145   1
   4 -13  14 2635.81 160.324   1
  -4  13 -14 2443.85 159.598   1
   4 -13  17 14005.4 484.296   1
  -4  13 -17 13341.5 479.015   1
   4 -13  20 4134.82 213.947   1
   9   4  20 4195.71 261.310   3
   9   4  20 4163.52 235.635   2
  -4  13 -20 3709.52 204.402   1
  13  -9 -20 3442.79 242.632   2
   9   4  23 5.51893 89.4694   1
   4 -13  23 39.5097 79.0290   1
  13  -9 -23-82.3945 126.342   2
  13  -9 -23-35.7208 130.278   3
   9   4  23-80.9006 116.248   2
   9   4  23 15.4422 111.352   3
   9   4  26 325.213 129.837   3
   9   4  26 199.668 89.7412   1
  13  -9 -26 223.516 131.754   3
  13  -9 -26 89.4108 124.872   2
   9   4  26 36.2249 104.361   2
  13  -9 -26 174.002 78.0991   1
  13  -9 -29 329.458 139.412   3
   9   4  29 321.050 82.7131   1
  13  -9 -29 322.510 75.2566   1
   9   4  29 259.362 106.670   2
  13  -9 -29 161.929 122.314   2
  13  -9 -32 971.252 180.677   3
  13  -9 -32 993.711 90.6472   1
  13  -9 -32 922.005 168.721   2
  13  -9 -35-30.5388 146.239   3
  -4  13 -35-33.1914 88.6946   2
  -4  13 -38-65.5600 86.1670   2
  10   3 -38 172.807 143.491   3
  10   3 -35 457.836 150.501   3
  10   3 -32-71.7885 81.3400   1
  13 -10  29-65.7467 97.7612   1
  10   3 -29-129.553 99.5063   1
  13 -10  26 588.393 74.7734   3
  10   3 -26 525.918 98.1024   1
  13 -10  26 413.492 98.0571   1
  13 -10  23 53.5058 80.4981   1
  -3  13  23 125.503 68.4420   1
  -3  13  23 71.2133 121.239   3
  13 -10  23 117.944 54.2342   3
  -3  13  20-49.4625 118.897   3
  13 -10  20-84.6512 93.2516   1
  -3  13  20-34.2412 76.8718   1
  -3  13  17 2156.66 155.949   1
   3 -13 -17 2270.21 161.935   1
   3 -13 -14 3979.91 210.547   1
  -3  13  14 4081.00 229.796   2
  -3  13  14 3734.15 213.293   1
  -3  13  11 319.592 76.9958   1
  -3  13  11 518.035 116.977   3
   3 -13 -11 403.109 85.4921   1
  -3  13  11 333.923 84.2800   2
  -3  13   8 816.781 123.008   3
   3 -13  -8 943.592 106.593   1
  -3  13   8 862.210 101.745   2
  -3  13   8 1091.15 112.444   1
  -3  13   5 12849.5 478.625   3
  -3  13   5 12069.7 456.755   1
  13 -10   5 12133.3 354.519   2
  -3  13   2 13205.8 466.071   3
  -3  13   2 11579.2 455.152   1
   3 -13   1 14933.2 540.344   1
  -3  13  -1 15940.6 560.394   1
  -3  13  -4 29666.4 874.934   3
   3 -13   4 28602.1 896.777   1
  -3  13  -7 42344.7 1186.61   3
   3 -13   7 43312.4 1235.49   1
  -3  13  -7 39136.5 1230.41   1
  -3  13 -10 30182.9 859.386   3
  -3  13 -10 30055.5 929.950   1
   3 -13  10 31275.2 929.958   1
  13 -10 -10 29027.7 917.950   2
  -3  13 -13 3785.16 141.614   3
  13 -10 -13 3910.59 220.426   2
  -3  13 -13 3894.91 207.573   1
  -3  13 -16 827.311 100.097   1
   3 -13  16 913.206 109.918   1
  13 -10 -16 683.618 112.908   2
   3 -13  19 501.833 92.7679   1
  -3  13 -19 405.804 87.1123   1
  13 -10 -19 296.010 108.743   2
  13 -10 -22 734.827 111.612   1
  10   3  22 881.268 129.433   2
  -3  13 -22 834.194 109.529   1
  10   3  22 1096.88 151.370   3
  13 -10 -22 878.032 146.561   2
  13 -10 -25 416.138 157.809   3
  -3  13 -25 217.652 90.3973   1
  13 -10 -25 407.506 87.7870   1
  10   3  25 399.201 108.612   2
  13 -10 -25 285.125 128.628   2
  10   3  25 484.337 132.162   3
  10   3  28 869.298 118.594   1
  13 -10 -28 854.030 172.636   3
  13 -10 -28 936.197 101.456   1
  10   3  28 1031.32 142.778   2
  13 -10 -28 1056.96 165.925   2
  10   3  28 1259.71 178.656   3
  13 -10 -31 2153.08 239.199   3
  10   3  31 2005.53 147.218   1
  13 -10 -31 2402.25 230.618   2
  13 -10 -31 2650.14 144.451   1
  13 -10 -34 1731.16 229.542   3
  13 -10 -34 1902.75 218.385   2
  -3  13 -37 150.493 101.304   2
  11   2 -39 177.155 163.661   3
  11   2 -36 352.765 166.222   3
  11   2 -33 2529.99 160.317   1
  11   2 -30 1823.31 144.713   1
  13 -11  27 1739.67 110.532   3
  -2  13  27 2047.83 143.256   1
  13 -11  27 2301.85 163.989   1
  13 -11  24 1834.01 113.475   3
  13 -11  24 2484.12 165.244   1
  -2  13  24 2523.64 241.739   3
  -2  13  24 1989.31 198.952   2
  -2  13  24 2045.86 149.779   1
  -2  13  21 2504.19 170.337   1
  -2  13  21 2671.49 246.426   3
  13 -11  21 2354.81 132.595   3
  13 -11  18 3165.32 186.253   1
  -2  13  18 2418.51 170.101   1
  -2  13  15 1551.77 138.296   1
  13 -11  15 1780.66 138.623   1
   2 -13 -15 1593.84 139.775   1
  -2  13  12 9097.36 412.289   3
  -2  13  12 8264.59 363.164   2
  -2  13  12 8231.73 357.672   1
   2 -13 -12 8820.55 355.879   1
   2 -13  -9 21373.9 705.202   1
  -2  13   9 22666.4 756.232   3
  -2  13   9 20882.1 710.635   1
   2 -13  -6 23719.4 769.175   1
  -2  13   6 24978.4 802.858   3
  -2  13   6 23598.9 781.650   1
  -2  13   3 64558.0 1868.82   1
  -2  13   3 68378.5 1879.17   3
  13 -11   3 64410.1 1748.64   2
  -2  13   0 95662.2 2533.41   3
   2 -13   0 88376.7 2521.99   1
  -2  13   0 87594.3 2536.70   1
  13 -11   0 90888.2 2444.85   2
   2 -13   3 57878.9 1676.19   1
  13 -11  -3 56750.2 1615.62   2
  -2  13  -3 61339.6 1663.88   3
   2 -13   6 27501.9 875.132   1
  13 -11  -6 26873.8 835.380   2
  -2  13  -6 29631.1 847.801   3
   2 -13   9 18784.8 635.088   1
  -2  13  -9 18029.6 630.091   1
  -2  13  -9 19577.8 587.248   3
  13 -11  -9 18760.8 616.013   2
   2 -13  12 9169.25 367.312   1
  -2  13 -12 8761.27 358.826   1
  13 -11 -12 8591.66 359.947   2
  -2  13 -12 9059.19 303.326   3
  -2  13 -15 4061.52 148.251   3
  -2  13 -15 3812.09 209.673   1
  13 -11 -15 3921.87 228.093   2
   2 -13  15 4249.27 226.114   1
  13 -11 -18 7226.48 390.999   3
  13 -11 -18 7195.53 342.281   2
  -2  13 -18 7784.20 315.920   1
  13 -11 -18 7680.93 315.224   1
  -2  13 -21 8815.95 348.041   1
  11   2  21 8441.97 369.603   2
  13 -11 -21 8482.61 395.919   2
  13 -11 -21 8923.82 347.855   1
  13 -11 -24 7159.70 302.276   1
  11   2  24 7384.77 338.789   2
  13 -11 -24 7233.41 370.162   2
  -2  13 -24 7471.97 309.829   1
  11   2  24 7705.95 383.852   3
  -2  13 -27 4788.33 227.619   1
  13 -11 -27 4597.96 291.870   2
  11   2  27 4390.80 261.825   2
  13 -11 -27 4619.66 219.054   1
  13 -11 -27 4467.31 327.893   3
  11   2  27 4781.48 307.975   3
  11   2  30 722.496 111.245   1
  13 -11 -30 563.660 174.696   3
  13 -11 -30 929.188 97.1802   1
  13 -11 -30 989.421 165.573   2
  11   2  30 801.035 139.818   2
  13 -11 -33 330.367 169.026   3
  13 -11 -33 201.582 135.547   2
  -2  13 -39 224.073 118.101   2
  12   1 -40-59.8206 138.546   3
  12   1 -37 258.705 153.707   3
  12   1 -34 92.6408 88.1385   1
  12   1 -34 73.8491 134.258   3
  12   1 -31 1551.19 137.292   1
  13 -12  28 1558.47 133.468   1
  -1  13  28 1297.50 122.689   1
  13 -12  25 3654.80 142.463   3
  -1  13  25 4340.10 221.694   1
  13 -12  22 4507.29 222.262   1
  -1  13  22 4024.71 302.136   3
  -1  13  22 3881.70 253.828   2
  -1  13  22 3568.20 205.536   1
  13 -12  22 3239.21 139.973   3
  13 -12  19-54.3531 76.9494   1
  -1  13  19 4.95096 71.1267   1
  13 -12  16 1235.47 118.103   1
  -1  13  16 1072.85 121.951   1
  -1  13  13 1819.45 178.876   3
  13 -12  13 1943.36 146.626   1
  -1  13  13 2027.61 159.761   1
   1 -13 -10 7032.23 315.333   1
  -1  13  10 7766.75 364.045   3
  -1  13  10 7190.21 332.274   1
  13 -12  10 7481.33 316.712   1
   1 -13  -7 190.207 70.6027   1
  -1  13   7 337.926 95.3174   3
  -1  13   7 395.085 87.8022   1
  -1  13   4 19199.1 691.557   1
  -1  13   4 21672.8 706.832   3
  13 -12   1 40729.1 1145.53   2
  -1  13   1 39819.4 1254.49   1
   1 -13  -1 41844.9 1244.91   1
  13 -12  -2 42164.8 1184.89   2
   1 -13   2 43686.1 1264.86   1
  -1  13  -2 45869.1 1259.12   3
  -1  13  -5 21099.2 659.337   3
  13 -12  -5 19851.5 628.420   2
   1 -13   5 19898.4 676.660   1
  -1  13  -8 591.134 96.5229   1
  13 -12  -8 516.569 82.7940   2
  -1  13  -8 731.220 90.3574   3
   1 -13   8 664.149 106.233   1
  -1  13 -11 330.211 85.9193   1
  13 -12 -11 287.077 78.1704   1
  13 -12 -11 182.314 67.5720   2
  -1  13 -11 255.045 58.4510   3
  -1  13 -14 161.835 51.6347   3
  13 -12 -14 30.5662 90.0472   3
  13 -12 -14 106.433 69.7369   1
  -1  13 -14 179.530 73.7848   1
  13 -12 -14 118.528 80.4828   2
  13 -12 -17 182.186 106.319   3
  13 -12 -17 204.692 77.7833   1
  13 -12 -17 190.336 86.8033   2
  -1  13 -17 193.038 75.7931   1
  13 -12 -20 1068.97 170.341   3
  13 -12 -20 1197.94 123.940   1
  12   1  20 1014.30 129.833   2
  -1  13 -20 1430.61 130.406   1
  13 -12 -20 1042.97 145.482   2
  -1  13 -20 1120.93 53.7538   3
  -1  13 -23 1726.07 146.217   1
  12   1  23 1849.79 200.532   3
  12   1  23 1851.03 161.203   2
  13 -12 -23 1651.34 177.613   2
  13 -12 -23 1902.96 145.709   1
  13 -12 -26 2046.03 141.849   1
  13 -12 -26 1674.78 184.899   2
  12   1  26 1714.63 160.466   2
  -1  13 -26 1965.83 146.505   1
  12   1  26 1537.77 196.746   3
  12   1  29 1274.68 186.521   3
  13 -12 -29 1307.32 116.098   1
  13 -12 -29 902.336 180.877   3
  13 -12 -29 1036.48 164.384   2
  12   1  29 1125.15 143.562   2
  -1  13 -29 1090.96 114.741   1
  13 -12 -32 61.3769 141.738   3
  13 -12 -32 164.223 123.733   2
  13 -12 -32 146.817 72.9011   1
  -1  13 -38-100.150 119.948   2
  13   0 -38-8.83779 132.779   3
  13   0 -35-43.3810 128.480   3
  13   0 -32 105.441 86.0740   1
   0  13  29 854.954 104.840   1
  13 -13  29 1038.91 119.659   1
   0  13  26 1283.99 131.878   1
  13 -13  26 1538.14 136.974   1
  13 -13  23 757.609 120.709   1
   0  13  23 641.661 112.191   1
   0  13  20 9789.37 453.966   3
   0  13  20 8570.47 355.100   1
   0  13  20 8658.55 386.298   2
  13 -13  20 9911.59 355.345   1
   0  13  17 12859.7 505.227   1
  13 -13  17 14640.2 502.567   1
   0  13  14 6012.66 305.040   1
  13 -13  14 6810.50 295.211   1
  13 -13  11 17538.1 594.274   1
   0  13  11 17555.4 657.432   3
   0  13  11 16928.1 619.507   1
  13 -13   8 12768.1 459.074   1
   0  13   8 11479.1 472.016   1
   0  13   8 12251.5 498.899   3
   0  13   5 2767.44 195.162   3
  13 -13   5 2521.68 167.449   1
   0  13   5 2119.98 172.209   1
  13 -13   2 5606.88 262.503   1
   0  13   2 4747.59 268.708   1
   0  13   2 5474.78 276.965   3
  13 -13  -1 8133.57 329.427   1
  13 -13  -1 7473.56 266.019   2
   0  13  -1 6967.81 334.829   1
   0  13  -1 7848.69 338.655   3
   0  13  -4 1978.90 147.914   3
  13 -13  -4 1765.62 114.109   2
  13 -13  -7 569.980 89.1215   1
   0  13  -7 614.369 98.1818   1
  13 -13  -7 464.859 74.0092   2
   0  13  -7 643.754 88.3192   3
  13 -13 -10 1796.59 139.728   1
  13 -13 -10 1449.84 158.112   3
  13 -13 -10 1916.09 137.717   2
   0  13 -10 1599.03 139.304   1
  13 -13 -13 5198.32 309.566   3
   0  13 -13 5221.04 260.538   1
  13 -13 -13 5541.48 265.944   2
  13 -13 -13 5580.42 261.241   1
   0  13 -16 1423.03 132.198   1
  13 -13 -16 1495.00 174.401   3
  13 -13 -16 1884.70 143.242   1
  13 -13 -16 1455.93 144.555   2
  13 -13 -19 4337.90 223.001   1
  13 -13 -19 3863.40 285.738   3
   0  13 -19 4065.79 220.255   1
  13 -13 -19 4004.97 246.695   2
  13 -13 -22 1293.89 191.865   3
  13   0  22 1571.90 143.895   2
  13 -13 -22 1350.71 164.183   2
   0  13 -22 1526.45 133.575   1
  13 -13 -22 1551.32 140.344   1
   0  13 -25 91.1350 71.5592   1
  13 -13 -25 29.5246 104.796   2
  13   0  25 174.452 83.8521   2
  13 -13 -25 41.6596 76.1212   1
  13   0  25-126.185 135.476   3
   0  13 -28 527.716 92.6462   1
  13 -13 -28 400.881 79.1433   1
  13 -13 -28 360.246 129.391   2
  13   0  28 362.172 104.390   2
  13   0  28 191.390 130.246   3
  13 -13 -31-61.7305 148.402   3
  13 -13 -31 119.957 67.0532   1
  13 -13 -31 144.464 121.152   2
   0  13 -31 143.763 68.6871   1
  13   0  31 96.0335 87.9353   2
   1  13 -33-82.5042 80.0950   1
  13 -14 -30 31.0773 129.553   3
   1  13 -30 7.97434 75.6125   1
  13 -14 -30-78.7698 75.3161   1
  13 -14 -30-134.179 132.577   2
  14  -1  30-34.3015 97.9380   2
   1  13 -27 4.86258 27.9296   3
  13 -14 -27-45.3449 73.2856   1
   1  13 -27-73.9040 81.6068   1
  13 -14 -27-157.608 131.233   2
  14  -1  27-130.333 98.9725   2
  14  -1  27-113.547 136.626   3
  13 -14 -24 164.821 125.069   3
  13 -14 -24 109.014 113.163   2
  13 -14 -24 199.496 86.0296   1
  14  -1  24 368.053 99.9571   2
   1  13 -24 224.648 83.3979   1
  14  -1  21 654.059 114.100   2
  13 -14 -21 632.469 150.845   3
  13 -14 -21 595.568 126.802   2
   1  13 -21 586.775 98.9009   1
  13 -14 -21 660.266 108.939   1
   1  13 -18 1017.11 112.810   1
  13 -14 -18 707.981 141.903   3
  13 -14 -18 717.950 123.642   2
  13 -14 -18 687.867 103.104   1
  13 -14 -15 3425.01 204.710   1
  13 -14 -15 3574.81 219.659   2
  13 -14 -15 3586.50 258.515   3
   1  13 -15 3805.61 210.097   1
  13 -14 -12 6010.21 282.123   2
   1  13 -12 5922.23 280.873   1
  13 -14 -12 5934.39 280.433   1
  13 -14 -12 5920.90 327.952   3
  13 -14  -9 15997.3 615.682   3
  13 -14  -9 15489.5 539.512   2
  13 -14  -9 16390.8 567.154   1
   1  13  -9 16545.3 573.820   1
  13 -14  -6 28077.5 939.818   3
  13 -14  -6 28625.5 858.119   2
  13 -14  -6 29166.8 902.624   1
   1  13  -3 21462.3 716.568   3
   1  13   0 18216.5 631.173   3
   1  13   0 16943.3 625.485   1
  13 -14   0 17988.9 608.596   1
  13 -14   3 7088.25 311.953   1
   1  13   3 7455.66 345.910   3
  13 -14   6 8305.55 335.921   1
   1  13   6 7563.47 367.131   3
   1  13   9 7092.62 357.233   3
  13 -14   9 6598.85 301.302   1
   1  13   9 6275.85 323.744   1
   1  13  12 6577.94 353.606   3
  13 -14  12 6719.41 301.129   1
   1  13  12 6318.52 318.809   1
  13 -14  15 15333.8 534.326   1
   1  13  15 14301.3 554.262   1
   1  13  18 14505.7 522.706   2
  13 -14  18 15174.7 481.172   1
   1  13  18 14154.3 499.407   1
   1  13  21 8807.39 456.969   3
   1  13  21 7997.18 365.986   1
   1  13  21 8188.72 400.364   2
  13 -14  21 9237.67 369.706   1
  13 -14  24 4758.47 247.893   1
   1  13  24 4186.16 245.475   1
  13 -14  27 1004.97 132.084   1
   1  13  27 696.082 114.557   1
   1  13  30 4.34782 80.7605   1
  14  -1 -33 81.6497 79.6340   1
  14  -1 -36-9.21241 140.370   3
   2  12 -34 9.71696 63.4485   1
  12 -14 -31 419.317 151.541   3
   2  12 -31 508.941 87.9817   1
   2  12 -31 362.306 53.3864   3
  12 -14 -31 471.742 137.378   2
  14  -2  31 264.305 133.008   3
  12 -14 -31 409.116 80.3413   1
  12 -14 -28 103.684 75.6970   1
   2  12 -28 93.3268 69.3025   1
   2  12 -28-62.2307 58.3639   3
  12 -14 -28-63.2311 112.654   2
  14  -2  28 5.14980 85.5084   2
  14  -2  28-23.7288 126.641   3
  12 -14 -25 74.5432 127.529   3
  12 -14 -25 269.760 83.3082   1
  14  -2  25 239.155 117.872   3
  12 -14 -25 322.649 120.071   2
   2  12 -25 208.985 78.2261   1
  14  -2  25 67.7175 88.7223   2
   2  12 -22 871.590 105.887   1
  12 -14 -22 801.951 160.904   3
  12 -14 -22 1020.88 118.365   1
  12 -14 -22 790.735 140.673   2
  14  -2  22 718.621 116.911   2
  12 -14 -19 1170.52 170.186   3
  12 -14 -19 1344.64 131.187   1
  12 -14 -19 1299.56 146.441   2
  14  -2  19 975.686 125.002   2
   2  12 -19 1454.38 129.076   1
  12 -14 -16 11898.9 465.818   2
  12 -14 -16 12093.4 444.949   1
   2  12 -16 12167.1 440.911   1
  12 -14 -16 11279.2 511.024   3
  12 -14 -13 12618.1 528.383   3
  12 -14 -13 12656.1 468.749   2
   2  12 -13 12256.0 461.100   1
  12 -14 -13 13060.1 466.721   1
  12 -14 -10 8932.87 357.244   1
  12 -14 -10 8172.36 390.238   3
  12 -14 -10 8853.12 344.621   2
   2  12 -10 8612.91 353.292   1
  12 -14  -7 9014.79 356.736   1
  12 -14  -7 8402.18 382.878   3
   2  12  -7 8341.85 355.914   1
  12 -14  -4 343.120 85.3146   3
  12 -14  -1 6995.19 315.139   3
  12 -14  -1 6868.66 303.830   1
   2  12  -1 7137.11 322.330   1
  12 -14   2 2497.14 164.931   3
  12 -14   2 2628.92 169.626   1
   2  12   2 2367.34 176.341   1
   2  12   2 2852.29 192.354   3
  12 -14   5 37.7590 62.3174   1
  12 -14   5 86.0271 54.6570   3
   2  12   5 116.566 66.2257   1
   2  12   5 94.7019 72.6232   3
   2  12   8 344.042 108.008   3
  12 -14   8 286.337 59.2526   3
   2  12   8 312.453 85.3282   1
  12 -14   8 300.879 78.4612   1
  12 -14  11 9315.89 359.261   1
  12 -14  11 8186.16 297.056   3
   2  12  11 8546.76 381.522   1
   2  12  11 9503.34 422.846   3
   2  12  14 9095.60 380.557   1
  12 -14  14 8626.08 340.657   1
   2  12  17 1347.67 148.891   2
  12 -14  17 1366.99 133.140   1
   2  12  17 1349.13 145.394   1
   2  12  20 389.159 132.950   3
   2  12  20 349.040 102.447   1
   2  12  20 235.809 116.036   2
  12 -14  20 324.477 99.9161   1
  12 -14  23 189.370 92.6334   1
   2  12  23 125.321 90.7594   1
  12 -14  26 417.876 99.9575   1
   2  12  26 550.302 99.1651   1
   2  12  29 112.616 75.0655   1
  14  -2 -35-176.506 163.513   3
  11 -14 -32-10.3294 122.338   3
  14  -3  32-128.447 136.018   3
   3  11 -32-116.009 74.9226   3
  11 -14 -32 32.0926 66.7139   1
  11 -14 -32 25.7765 116.998   2
   3  11 -32 48.2939 67.0063   1
  11 -14 -29 96.3729 105.485   2
  11 -14 -29 17.9682 65.9693   1
  14  -3  29 60.6932 87.3520   2
  14  -3  29-177.707 137.859   3
   3  11 -29 51.4982 74.2942   1
  11 -14 -26 59.6011 108.274   2
   3  11 -26 45.0558 71.1951   1
  11 -14 -26 19.5172 73.1819   1
  14  -3  26-129.033 105.001   2
  14  -3  26-114.354 122.430   3
  11 -14 -23 26.3172 121.541   3
  11 -14 -23 115.303 79.6908   1
   3  11 -23 278.984 84.4059   1
  11 -14 -23 47.9042 111.653   2
  14  -3  23 8.42608 91.7669   2
   3  11 -20 95.7519 78.2167   1
  11 -14 -20 318.423 131.647   3
  11 -14 -20 89.9335 73.6289   1
  11 -14 -20 87.3717 93.4800   2
  14  -3  20 135.363 80.1522   2
  11 -14 -17 587.257 131.728   3
  11 -14 -17 761.519 103.786   1
  11 -14 -17 839.886 116.890   2
   3  11 -17 796.792 101.062   1
  11 -14 -14 4406.88 276.170   3
  11 -14 -14 4696.50 243.549   2
  11 -14 -14 4368.67 226.059   1
   3  11 -14 4501.31 226.808   1
  11 -14 -11 6332.67 330.922   3
   3  11 -11 6771.69 292.312   1
  11 -14 -11 6945.69 297.801   1
  11 -14  -8 2827.42 200.626   3
   3  11  -8 2938.63 178.983   1
  11 -14  -8 2948.30 177.121   1
  11 -14  -5 1127.04 123.150   3
  11 -14  -2 129.186 61.5858   3
  11 -14   1 3632.93 199.236   3
   3  11   1 4249.73 226.619   1
  11 -14   1 3948.32 209.212   1
  11 -14   4 5522.38 239.559   3
   3  11   4 5471.56 276.391   1
  11 -14   4 5762.81 261.390   1
  11 -14   7 499.647 64.9426   3
   3  11   7 469.706 90.1563   1
  11 -14   7 593.071 88.7168   1
   3  11   7 459.090 104.377   3
  11 -14  10 1684.64 97.0748   3
   3  11  10 1802.28 154.645   1
  11 -14  10 1880.41 142.372   1
   3  11  10 1864.96 178.049   3
   3  11  13 8219.48 358.801   1
  11 -14  13 8736.31 336.159   1
  11 -14  13 7521.09 242.041   3
  11 -14  16 8489.14 343.028   1
   3  11  16 8389.78 374.930   2
   3  11  16 8025.53 363.214   1
   3  11  16 8044.20 404.608   3
  11 -14  19 4587.80 231.447   1
   3  11  19 4142.76 256.784   2
   3  11  19 3939.32 244.614   1
   3  11  19 4031.98 290.202   3
   3  11  22 74.2456 91.4402   1
   3  11  22 226.822 125.884   3
  11 -14  22 162.704 94.3921   1
   3  11  22 261.135 111.141   2
   3  11  25 1712.22 155.272   1
  11 -14  25 1987.81 155.211   1
  11 -14  28 461.477 97.5708   1
   3  11  28 413.009 88.6368   1
  14  -3 -34 225.787 154.484   3
  14  -3 -37-179.290 155.834   3
  10 -14 -33-20.6731 118.126   3
   4  10 -33 38.3789 64.8519   1
  10 -14 -30-20.5724 67.4508   1
   4  10 -30 20.8437 69.1888   1
  14  -4  30-62.4716 109.378   3
   4  10 -30-73.2104 82.1029   3
   4  10 -27 1036.46 110.574   1
  10 -14 -27 970.864 111.186   1
  14  -4  27 986.338 151.441   3
  14  -4  27 889.877 123.582   2
  10 -14 -24 1183.40 162.892   2
  10 -14 -24 1199.85 120.149   1
  14  -4  24 1213.44 121.466   2
   4  10 -24 1281.89 121.790   1
  10 -14 -24 1066.57 180.556   3
  10 -14 -21 3221.28 257.369   3
  10 -14 -21 2967.12 228.030   2
  14  -4  21 3126.06 174.630   2
   4  10 -21 3300.51 184.708   1
  10 -14 -21 3339.43 191.416   1
  10 -14 -18 10553.9 472.767   3
  14  -4  18 10449.8 376.655   2
   4  10 -18 10635.3 388.540   1
  10 -14 -18 10756.0 398.923   1
  10 -14 -15 3460.12 237.820   3
  10 -14 -15 3326.22 188.320   1
   4  10 -15 3249.61 182.545   1
  10 -14 -12 4889.49 277.824   3
  10 -14 -12 4994.14 239.296   1
   4  10 -12 4873.88 234.203   1
  10 -14  -9 5978.83 302.310   3
   4  10  -9 6104.57 274.611   1
  10 -14  -9 6402.07 280.718   1
  10 -14  -6 267.672 69.6766   3
  10 -14  -6 237.833 67.2008   1
  10 -14  -3 1747.56 136.892   3
   4  10   0 1503.08 129.069   1
  10 -14   0 1631.93 124.420   3
  10 -14   0 1883.57 134.746   1
  10 -14   3 244.254 66.1133   1
  10 -14   3 267.767 55.6679   3
   4  10   6 3874.42 218.652   1
  10 -14   6 3549.24 167.076   3
  10 -14   6 4017.90 204.993   1
   4  10   9 11660.9 456.627   1
  10 -14   9 11379.9 367.571   3
  10 -14   9 12602.4 438.593   1
  10 -14  12 4600.81 219.329   1
   4  10  12 4285.39 240.936   1
  10 -14  15 4842.90 236.087   1
   4  10  15 4367.18 251.142   1
   4  10  15 4948.61 296.116   3
  10 -14  18 9959.55 380.438   1
   4  10  18 9536.45 451.069   3
   4  10  18 9563.49 415.110   2
   4  10  18 8815.51 393.385   1
  10 -14  21 274.418 93.5573   1
   4  10  21 258.512 107.621   2
   4  10  21 178.765 128.032   3
   4  10  21 178.762 98.1815   1
   4  10  24 192.658 98.1459   1
   4  10  24 238.512 133.730   3
   4  10  24 264.166 111.734   2
  10 -14  24 43.6857 96.0105   1
   4  10  27-45.0822 88.6831   1
  10 -14  27 4.20656 82.0566   1
   4  10  30 80.8144 71.1249   1
  14  -4 -33-76.4020 163.607   3
  14  -4 -36-67.0169 164.009   3
   5   9 -34 288.099 87.0740   3
   5   9 -34 452.665 77.8891   1
   9 -14 -31 624.539 88.8574   1
   5   9 -31 231.556 97.4943   3
   9 -14 -31 494.743 147.566   3
  14  -5  31 376.652 114.141   3
   5   9 -31 544.323 86.8215   1
   5   9 -28 31.0499 68.9866   1
   9 -14 -28-17.9319 74.8272   1
  14  -5  28 12.6677 103.931   3
   9 -14 -25 168.586 130.081   3
   9 -14 -25 111.165 85.5102   1
  14  -5  25 295.536 107.659   3
  14  -5  25 328.051 77.7111   2
   5   9 -25 270.709 80.7193   1
   9 -14 -22 578.833 153.071   3
  14  -5  22 716.255 90.8380   2
   5   9 -22 575.385 93.2910   1
   9 -14 -22 641.698 99.6338   1
   9 -14 -19 6047.18 338.505   3
   5   9 -19 5712.19 253.748   1
  14  -5  19 5783.00 236.166   2
   9 -14 -19 5634.30 261.250   1
   5   9 -16 23537.4 720.193   1
  14  -5  16 22948.4 688.029   2
   9 -14 -16 21347.1 794.151   3
   9 -14 -16 22989.1 727.136   1
   9 -14 -13 15216.4 522.131   1
   9 -14 -13 14703.0 567.733   3
   5   9 -13 15159.8 513.623   1
   9 -14 -10 11142.2 450.198   3
   9 -14 -10 11616.5 419.627   1
   5   9 -10 11083.3 411.366   1
   9 -14  -7 5679.15 279.967   3
   5   9  -7 5844.55 265.368   1
   9 -14  -7 6019.43 268.035   1
  -9  14   7 6439.55 255.646   2
   9 -14  -4 447.059 78.2145   3
  -9  14   4 451.114 62.0329   2
   5   9  -1 4322.76 223.071   1
   9 -14  -1 4567.04 222.978   1
  -9  14   1 4618.61 186.452   2
   9 -14  -1 4207.33 212.562   3
   9 -14   2 6326.69 261.757   3
   5   9   2 6482.13 291.358   1
   9 -14   2 6750.28 285.672   1
  -9  14  -2 6837.78 235.937   2
   9 -14   5 20076.5 644.549   3
   5   9   5 21553.2 708.526   1
   9 -14   5 22403.6 693.034   1
  -9  14  -5 22054.1 616.857   2
   5   9   8 29290.4 895.429   1
   9 -14   8 29885.2 868.393   1
   9 -14  11 20839.3 645.624   1
   5   9  11 19590.5 671.147   1
  -9  14 -11 19192.2 539.384   2
   5   9  14 22080.6 767.487   1
   9 -14  14 23934.2 744.019   1
   5   9  14 23810.9 817.762   3
   5   9  17 13877.3 526.725   1
  -9  14 -17 13397.6 389.723   2
   5   9  17 14594.7 575.242   3
   5   9  20 9027.84 388.381   1
   5   9  20 9789.01 413.711   2
   5   9  20 9019.21 441.993   3
  -9  14 -20 8816.65 275.645   2
   9 -14  20 9607.87 367.553   1
   5   9  23 3126.57 232.839   2
  -9  14 -23 2348.56 115.586   2
   9 -14  23 2980.11 187.762   1
   5   9  23 2803.65 193.526   1
   5   9  23 3595.56 267.596   3
   9 -14  26 2524.17 169.737   1
   5   9  26 2193.81 165.033   1
   5   9  29 871.185 113.027   1
   9 -14  29 982.127 117.527   1
  -9  14 -29 786.569 86.0619   2
  14  -5 -32 320.202 159.290   3
  -9  14 -32 154.692 74.8216   2
  14  -5 -35 330.559 168.133   3
   6   8 -35-125.937 106.933   3
   6   8 -32-86.0907 119.263   3
   6   8 -32 31.3792 70.8281   1
   8 -14 -32 49.9780 124.355   3
  14  -6  29-92.6102 104.218   3
   6   8 -29-89.5665 74.1915   1
   8 -14 -29-60.5575 80.9390   1
   8 -14 -26-131.934 95.5059   1
   6   8 -26-6.80518 83.2383   1
   6   8 -23-87.3626 83.6356   1
   8 -14 -23-99.3128 90.1215   1
  14  -6  23-85.4089 73.2401   2
   8 -14 -20 921.445 158.809   3
   6   8 -20 866.945 104.312   1
   8 -14 -20 901.466 111.825   1
  14  -6  20 945.671 88.0525   2
   6   8 -17 4567.50 217.285   1
   8 -14 -17 4104.48 272.437   3
  14  -6  17 4742.43 190.008   2
   8 -14 -17 4317.60 222.544   1
  -8  14  14 19930.2 667.687   2
   6   8 -14 19911.3 641.875   1
   8 -14 -14 20609.1 653.450   1
   8 -14 -14 18991.8 700.542   3
   8 -14 -11 20801.3 717.762   3
   6   8 -11 20861.9 668.470   1
   8 -14 -11 20614.2 673.343   1
  -8  14  11 21254.8 674.566   2
   6   8  -8 9988.39 386.042   1
  -8  14   8 10609.5 380.847   2
   8 -14  -8 10448.5 417.932   3
   8 -14  -8 10720.5 395.266   1
   8 -14  -5 8969.96 366.994   3
  -8  14   5 9453.27 338.105   2
   8 -14  -2 442.036 69.6872   3
  -8  14   2 489.711 60.5393   2
   8 -14   1 566.157 81.1561   1
  -8  14  -1 569.146 61.4022   2
   6   8   1 621.285 82.6366   1
   8 -14   1 550.446 71.9989   3
   8 -14   4 721.413 89.1348   1
  -8  14  -4 627.275 56.8168   2
   8 -14   4 500.513 62.9806   3
   6   8   4 646.484 88.6472   1
   6   8   7 11837.0 444.714   1
   8 -14   7 10987.9 367.072   3
   6   8  10 18617.1 656.450   1
   8 -14  10 20067.8 637.454   1
   8 -14  13 28827.5 853.463   1
   6   8  13 27556.0 917.668   3
   6   8  16 28764.0 942.305   1
   6   8  16 29978.6 988.410   3
   8 -14  16 30144.3 911.429   1
   6   8  19 15249.6 560.094   2
   8 -14  19 14953.7 511.891   1
   6   8  19 13303.7 531.015   1
   6   8  19 14539.9 590.990   3
   6   8  22 10424.1 428.038   1
   8 -14  22 11775.2 415.624   1
   6   8  22 11713.9 467.675   2
  -8  14 -22 10000.2 338.127   2
   6   8  22 11380.7 498.627   3
   6   8  25 2683.04 242.792   3
   8 -14  25 2570.21 171.326   1
   6   8  25 1953.09 166.149   1
   6   8  25 2477.13 217.255   2
  -8  14 -25 1983.58 119.976   2
   8 -14  28 444.378 106.004   1
  -8  14 -28 383.683 75.4679   2
   6   8  28 449.223 101.492   1
   6   8  31 495.603 88.2575   1
  14  -6 -31 426.627 156.679   2
  14  -6 -31 551.614 181.969   3
  -8  14 -31 262.106 81.2853   2
  14  -6 -34 138.314 154.662   3
  -8  14 -34-64.8799 82.5907   2
   7   7 -36-83.3178 111.090   3
   7   7 -33 15.1564 74.6362   1
   7   7 -33 11.3927 106.304   3
   7 -14 -33 49.9028 126.730   3
  14  -7  30-57.9823 96.0664   3
   7   7 -30 51.9680 70.5989   1
   7 -14 -30 170.519 123.846   3
   7 -14 -27 45.7728 81.8161   1
   7   7 -27 170.414 77.7102   1
  14  -7  27 114.577 93.0970   3
   7 -14 -24 1935.54 145.098   1
   7   7 -24 1776.12 133.444   1
   7 -14 -24 1657.47 203.585   3
   7   7 -21 6996.15 284.336   1
   7 -14 -21 6978.67 295.882   1
   7 -14 -21 6449.53 366.312   3
   7   7 -18 14811.2 510.682   1
   7 -14 -18 15157.5 521.761   1
  14  -7  18 16277.6 474.527   2
  -7  14  18 14869.6 554.677   2
   7 -14 -18 14171.7 592.728   3
   7   7 -15 8487.82 328.534   1
  14  -7  15 8315.14 276.002   2
   7 -14 -15 8552.16 337.041   1
  -7  14  15 8163.76 347.278   2
   7 -14 -15 7522.45 375.386   3
   7 -14 -12 3569.66 226.994   3
   7   7 -12 3828.89 196.614   1
   7 -14 -12 3634.12 198.440   1
  -7  14  12 3605.30 203.762   2
  -7  14   9 7184.21 305.596   1
  -7  14   9 7507.53 299.311   2
   7 -14  -9 7221.54 301.267   1
   7 -14  -9 6923.83 321.845   3
   7   7  -9 7219.47 297.598   1
  -7  14   6 2865.69 175.485   1
  -7  14   6 3025.16 161.589   2
   7 -14  -6 3058.80 175.779   1
   7 -14  -6 2706.98 175.253   3
  -7  14   3 1219.48 96.0003   2
   7 -14  -3 1342.40 111.869   3
  -7  14   3 1222.37 114.756   1
  -7  14   0 5202.20 209.902   2
  -7  14   0 5037.07 245.959   1
   7 -14   0 5526.71 246.908   1
   7 -14   0 4933.05 225.951   3
   7 -14   3 6196.94 269.051   1
   7 -14   3 5753.81 236.732   3
   7 -14   6 5729.28 259.760   1
   7 -14   9 13022.8 451.346   1
  -7  14  -9 11858.4 447.499   1
   7   7   9 12201.6 460.663   1
   7   7  12 8890.11 377.231   1
   7 -14  12 9229.24 356.135   1
   7   7  15 12927.0 523.586   3
   7 -14  15 13041.3 462.645   1
   7   7  15 12651.7 494.420   1
   7   7  18 10837.3 455.281   1
   7 -14  18 12090.7 433.182   1
   7   7  18 11710.7 496.925   3
   7   7  21 4386.95 253.374   1
   7 -14  21 4356.45 228.948   1
   7   7  21 4485.07 270.303   2
   7   7  21 4889.50 298.553   3
   7 -14  24 4099.38 218.287   1
   7   7  24 3593.89 229.214   1
   7   7  24 3940.01 258.957   2
   7   7  24 4454.75 293.279   3
   7 -14  27 1278.38 135.328   1
   7   7  27 1141.21 128.782   1
  -7  14 -27 1109.76 102.061   2
  14  -7 -30-44.2927 131.176   2
  14  -7 -30 99.8304 134.151   3
  14  -7 -30 52.4689 67.2127   1
  -7  14 -30-29.5574 66.5912   2
   7   7  30 8.09181 68.9248   1
  14  -7 -33-40.1907 151.494   3
  -7  14 -33-3.54486 75.7208   2
  14  -7 -36 10.1312 143.826   3
   8   6 -37 49.8611 115.778   3
   8   6 -34 730.675 96.1820   1
   8   6 -34 825.843 137.893   3
   6 -14 -31 451.435 148.326   3
   8   6 -31 955.688 102.792   1
  14  -8  28 11.7372 86.6179   1
   8   6 -28 10.0535 72.5889   1
  14  -8  28 32.2734 84.2283   3
  14  -8  25 1749.71 154.125   3
   8   6 -25 2216.91 146.855   1
   6 -14 -25 2090.84 154.418   1
   6 -14 -25 1822.39 215.832   3
   8   6 -22 7062.87 289.810   1
   6 -14 -22 6849.65 298.691   1
   6 -14 -22 7109.01 382.166   3
   8   6 -19 18651.5 598.878   1
   6 -14 -19 18089.9 606.917   1
   6 -14 -19 17241.8 681.554   3
  -6  14  19 18636.1 647.332   2
   8   6 -16 25270.0 780.776   1
   6 -14 -16 23258.2 848.381   3
  14  -8  16 25528.6 707.190   2
  -6  14  16 25360.2 811.820   2
   6 -14 -16 24621.2 784.190   1
   6 -14 -13 18239.5 609.406   1
  14  -8  13 19053.0 530.461   2
  -6  14  13 19233.9 629.893   2
   6 -14 -13 17187.9 653.290   3
  -6  14  13 17474.0 609.996   1
  -6  14  10 5255.64 251.670   1
   6 -14 -10 5256.90 245.175   1
  -6  14  10 5502.80 249.933   2
   6 -14 -10 4835.32 265.172   3
  -6  14   7 781.787 110.715   3
  -6  14   7 877.227 92.4169   2
   6 -14  -7 1119.27 103.794   1
   6 -14  -7 844.616 103.246   3
  -6  14   7 758.699 96.4098   1
   6 -14  -4 2480.62 159.212   3
  -6  14   4 2533.20 174.485   3
  -6  14   4 2673.12 149.465   2
  -6  14   4 2610.63 167.274   1
   6 -14  -1 8996.02 354.142   1
  -6  14   1 9124.83 365.430   1
  -6  14   1 9726.95 332.071   2
   6 -14  -1 8263.90 335.381   3
   6 -14   2 17888.1 590.775   1
  -6  14  -2 17311.7 596.211   1
   6 -14   5 18578.5 615.751   1
   6 -14   8 14036.3 487.885   1
  -6  14  -8 13535.3 493.540   1
  -6  14 -11 9268.10 377.717   1
   6 -14  11 10318.4 380.801   1
  -6  14 -14 429.592 78.6299   1
   6 -14  14 273.017 76.1880   1
   6 -14  17 1045.66 114.946   1
   8   6  17 680.020 116.583   1
   8   6  17 885.983 137.386   3
   8   6  20 2355.81 209.408   3
   8   6  20 2470.07 189.163   2
   6 -14  20 2179.77 164.990   1
   8   6  20 2092.55 182.021   1
   8   6  23 1392.65 157.268   1
   8   6  23 1837.59 175.183   2
   6 -14  23 1573.08 149.206   1
   8   6  23 2067.61 210.656   3
   6 -14  26 2346.43 173.676   1
   8   6  26 2228.63 180.561   1
  14  -8 -26 2700.88 245.341   3
   8   6  26 2155.45 194.332   2
  14  -8 -26 2367.21 223.109   2
   8   6  26 2538.33 241.016   3
  14  -8 -29 39.9473 132.417   3
  14  -8 -29 180.844 73.3828   1
   8   6  29 103.619 78.9164   1
  14  -8 -29 42.2783 122.913   2
  -6  14 -29 60.9417 76.2105   2
  14  -8 -32-172.646 157.950   3
  -6  14 -32-57.5282 79.3067   2
  14  -8 -32-72.2503 73.9067   1
  14  -8 -32-144.523 155.171   2
  14  -8 -35-133.838 158.509   3
  -6  14 -35-66.0247 81.2004   2
   9   5 -35 74.9058 110.070   3
   9   5 -32 74.6030 77.8429   1
   9   5 -29 608.073 95.6382   1
  14  -9  29 462.338 97.7516   1
  14  -9  26 2610.69 170.164   1
   9   5 -26 2636.82 162.601   1
   9   5 -23 5151.10 240.869   1
   5 -14 -23 4849.91 317.149   3
   5 -14 -23 5251.47 252.934   1
   5 -14 -20 7449.07 313.898   1
   5 -14 -20 6556.81 365.292   3
  -5  14  20 7462.99 347.981   2
   9   5 -20 7542.75 306.808   1
   5 -14 -17 15157.5 512.680   1
  -5  14  17 13680.7 498.592   1
  -5  14  17 15443.9 544.241   2
   5 -14 -17 13246.4 557.469   3
   5 -14 -14 20079.4 647.912   1
  -5  14  14 19791.9 664.461   2
   5 -14 -14 18660.3 693.996   3
  -5  14  14 18784.3 643.978   1
   5 -14 -11 25692.7 781.414   1
  14  -9  11 24045.9 668.453   2
  -5  14  11 24168.7 783.169   1
  -5  14  11 25203.1 782.506   2
   5 -14 -11 23625.7 808.098   3
  -5  14   8 30005.8 917.761   3
  -5  14   8 27312.1 863.193   1
   5 -14  -8 27892.1 853.491   1
  -5  14   8 27561.8 847.734   2
   5 -14  -8 25270.9 863.854   3
  -5  14   5 17784.4 622.420   1
  -5  14   5 19677.9 651.805   3
  -5  14   5 18414.9 601.620   2
  -5  14   2 21158.7 715.483   1
  -5  14   2 22814.8 721.578   3
  -5  14  -1 4774.04 244.967   1
  -5  14  -1 5341.59 240.379   3
   5 -14   1 4917.47 239.382   1
  -5  14  -4 6671.28 268.982   3
   5 -14   4 6765.13 291.085   1
  -5  14  -7 11452.4 437.815   1
   5 -14   7 11844.2 433.188   1
   5 -14  10 1036.35 110.150   1
  -5  14 -10 948.755 108.022   1
   5 -14  13 3596.84 200.026   1
  -5  14 -13 3357.57 197.189   1
   5 -14  16 1935.91 150.241   1
  -5  14 -16 1979.17 149.174   1
  -5  14 -19 2517.91 167.146   1
   5 -14  19 2593.35 175.726   1
   9   5  19 2511.11 213.375   3
   9   5  22 3363.08 221.169   2
  14  -9 -22 2695.44 234.246   2
   5 -14  22 3421.23 204.263   1
   9   5  22 3540.10 265.413   3
   9   5  22 2976.46 215.993   1
   9   5  25 884.939 173.522   3
   5 -14  25 983.539 130.535   1
   9   5  25 774.719 130.938   1
  14  -9 -25 905.135 176.640   3
   9   5  25 910.831 140.177   2
  14  -9 -25 962.929 163.099   2
  14  -9 -28 415.382 132.533   2
  14  -9 -28 387.210 150.664   3
   9   5  28 290.099 94.8294   1
  14  -9 -28 611.438 93.1432   1
  14  -9 -31-51.3818 142.342   3
  14  -9 -31 43.3948 62.0047   1
   9   5  31-16.0587 74.5727   1
  14  -9 -31 8.80666 121.985   2
  -5  14 -31-61.7611 95.8330   2
  14  -9 -34-94.2582 162.898   3
  -5  14 -34-121.247 94.3251   2
  10   4 -36 102.742 117.161   3
  10   4 -33-46.0783 76.5007   1
  10   4 -30 1518.93 124.182   1
  14 -10  27 126.701 66.2374   3
  10   4 -27 253.463 84.1201   1
  14 -10  27 161.560 83.1233   1
  10   4 -24 497.956 97.2542   1
  14 -10  24 544.764 101.938   1
  14 -10  24 442.943 84.0005   3
  -4  14  21 7296.89 391.453   3
   4 -14 -21 6801.22 298.157   1
   4 -14 -18 2517.01 172.300   1
  -4  14  18 2475.65 190.198   2
  -4  14  18 2471.16 165.812   1
   4 -14 -15 1081.52 115.230   1
  -4  14  15 1226.81 156.595   3
  -4  14  15 1184.17 116.806   1
  -4  14  15 1007.49 122.456   2
  -4  14  12 7751.33 336.966   1
   4 -14 -12 8115.42 334.277   1
  -4  14  12 8867.22 399.630   3
  -4  14  12 7851.10 340.783   2
  -4  14   9 7006.14 337.105   3
   4 -14  -9 6540.55 287.880   1
  -4  14   9 6544.37 290.529   2
  -4  14   9 6183.64 293.439   1
  -4  14   6 17471.6 599.662   3
   4 -14  -6 15822.5 554.062   1
  -4  14   6 16172.0 546.095   2
  -4  14   6 15467.4 563.512   1
  -4  14   3 20266.2 657.493   3
  -4  14   3 17864.6 639.615   1
  -4  14   0 9638.74 371.263   3
   4 -14   0 8929.24 364.661   1
  -4  14   0 9350.17 381.597   1
   4 -14   3 706.405 93.2122   1
  -4  14  -3 809.312 88.9479   3
   4 -14   6 2672.80 171.150   1
  -4  14  -6 2619.08 145.138   3
  -4  14  -9 11.9099 42.5642   3
   4 -14   9 55.8114 59.6470   1
  -4  14  -9 29.3580 62.4426   1
  -4  14 -12 2022.43 150.625   1
   4 -14  12 2045.21 148.722   1
   4 -14  15 11643.5 426.678   1
  -4  14 -15 10822.4 418.796   1
  14 -10 -15 11087.1 443.060   2
   4 -14  18 13537.9 478.871   1
  -4  14 -18 12641.0 465.332   1
  14 -10 -18 12332.0 500.934   2
  10   4  21 7709.09 350.864   2
  -4  14 -21 7110.92 312.092   1
  14 -10 -21 6977.14 357.951   2
  10   4  21 7217.14 380.480   3
   4 -14  21 7673.06 328.354   1
  10   4  24 3836.36 249.979   1
  10   4  24 4323.34 261.301   2
  14 -10 -24 4406.86 282.158   2
  14 -10 -24 4436.71 225.844   1
  10   4  24 4594.32 309.234   3
  10   4  27 200.228 92.5353   1
  14 -10 -27 387.008 153.496   3
  14 -10 -27 320.727 78.6187   1
  10   4  27 421.997 119.587   2
  14 -10 -27 278.313 123.094   2
  14 -10 -30 10.3179 153.369   3
  10   4  30 22.6239 82.7045   1
  14 -10 -30 178.764 68.8583   1
  14 -10 -30 145.041 117.211   2
  14 -10 -33 1152.28 209.130   3
  14 -10 -33 1288.65 188.439   2
  -4  14 -36 100.954 81.9385   2
  11   3 -37-244.099 162.885   3
  11   3 -34 145.863 142.869   3
  11   3 -34 657.220 92.7563   1
  11   3 -31 488.426 96.4779   1
  11   3 -28 102.621 73.5509   1
  14 -11  28 135.754 77.0090   1
  14 -11  25 14.0217 54.4715   3
  -3  14  25-4.33811 70.9710   1
  14 -11  25-79.4314 86.2617   1
  14 -11  22 36.5384 93.6914   1
  -3  14  22-120.108 157.393   3
  -3  14  22 32.0266 78.3734   1
  -3  14  19 384.382 89.9155   1
  14 -11  19 597.614 101.383   1
   3 -14 -16 344.135 82.5696   1
  -3  14  16 188.168 71.6964   1
  -3  14  16 210.628 89.6351   2
   3 -14 -13 1736.07 142.915   1
  -3  14  13 2025.84 187.347   3
  -3  14  13 1898.26 158.891   2
  -3  14  13 1941.07 151.097   1
   3 -14 -10 3524.38 202.133   1
  -3  14  10 3477.48 205.831   2
  -3  14  10 3279.55 203.812   1
  -3  14  10 3756.03 244.005   3
  -3  14   7-6.27966 75.2449   3
   3 -14  -7 116.507 59.7896   1
  -3  14   7 97.0234 67.0839   1
  -3  14   4 1244.35 130.843   3
  -3  14   4 1043.92 118.672   1
  14 -11   4 1323.58 68.8390   2
  -3  14   1 429.634 87.5127   3
   3 -14  -1 498.304 89.2834   1
  -3  14   1 463.026 86.0931   1
  14 -11   1 512.395 56.0000   2
  -3  14  -2 4146.49 210.183   3
   3 -14   2 4251.81 221.180   1
  -3  14  -2 3319.60 210.150   1
  14 -11  -2 3606.67 171.239   2
   3 -14   5 570.905 93.8143   1
  14 -11  -5 529.412 76.4662   2
  -3  14  -8 1064.09 91.5927   3
   3 -14   8 1026.94 113.783   1
  -3  14  -8 884.369 110.229   1
  14 -11  -8 992.659 102.218   2
   3 -14  11 2845.69 179.251   1
  -3  14 -11 2533.88 173.966   1
  -3  14 -11 2883.34 133.448   3
  14 -11 -11 2806.30 175.910   2
   3 -14  14 6513.88 298.838   1
  -3  14 -14 6376.13 208.525   3
  14 -11 -14 6560.65 304.217   2
  -3  14 -14 6917.58 297.066   1
  -3  14 -17 7786.16 327.653   1
  14 -11 -17 7627.61 349.506   2
   3 -14  17 7631.04 332.480   1
  14 -11 -20 8325.29 332.569   1
  11   3  20 8190.61 357.465   2
  -3  14 -20 8079.01 332.783   1
  14 -11 -20 7515.34 366.210   2
  -3  14 -23 922.427 118.484   1
  11   3  23 766.957 129.957   2
  14 -11 -23 736.170 146.833   2
  11   3  23 793.192 163.237   3
  14 -11 -23 878.049 115.981   1
  14 -11 -26 69.2175 72.9313   1
  14 -11 -26-99.0962 143.466   3
  11   3  26-85.1095 111.059   2
  -3  14 -26 29.0955 76.6635   1
  14 -11 -26-38.6504 104.799   2
  11   3  26 59.2723 123.058   3
  14 -11 -29 216.542 80.0264   1
  11   3  29 153.310 81.2428   1
  14 -11 -29 164.921 151.011   3
  14 -11 -29 133.215 114.447   2
  11   3  29 200.934 113.243   2
  14 -11 -32 960.640 99.1209   1
  14 -11 -32 510.735 175.906   3
  14 -11 -32 698.714 154.245   2
  12   2 -35-41.1277 159.431   3
  12   2 -32 852.864 110.428   1
  12   2 -29 527.200 94.2658   1
  14 -12  26-51.1868 58.6864   3
  -2  14  26-8.96103 72.4173   1
  14 -12  26-26.3576 85.6954   1
  14 -12  23 2660.66 181.333   1
  -2  14  23 2433.53 172.440   1
  14 -12  23 2074.12 117.304   3
  14 -12  20-94.8374 97.8579   1
  -2  14  20-84.6030 94.3936   1
  -2  14  17 3420.84 214.522   1
  14 -12  17 4242.46 225.259   1
  -2  14  14 9036.87 424.590   3
  14 -12  14 9452.13 365.644   1
  -2  14  14 7957.47 366.197   2
  -2  14  14 7898.31 358.222   1
   2 -14 -14 8754.89 361.146   1
  -2  14  11 15707.5 595.130   3
  -2  14  11 14552.3 542.385   1
  -2  14  11 14370.0 533.951   2
   2 -14 -11 14718.2 529.966   1
   2 -14  -8 12948.1 485.936   1
  -2  14   8 13895.5 529.317   3
  -2  14   8 12801.4 498.277   1
  -2  14   5 17.9669 65.4247   3
  -2  14   5 57.6883 63.0206   1
  -2  14   2 5132.62 274.167   1
  14 -12   2 5304.56 192.078   2
   2 -14   1 21717.4 711.404   1
  -2  14  -1 20047.1 712.302   1
  14 -12  -1 20754.8 633.699   2
  -2  14  -4 16464.6 540.806   3
  14 -12  -4 15252.1 501.561   2
   2 -14   4 15044.2 552.337   1
   2 -14   7 1329.41 132.287   1
  -2  14  -7 1292.89 129.443   1
  14 -12  -7 1524.85 117.874   2
  -2  14  -7 1489.27 114.733   3
  -2  14 -10 10424.6 355.615   3
  -2  14 -10 9821.45 403.982   1
  14 -12 -10 10042.7 390.350   2
   2 -14  10 10501.9 408.580   1
  -2  14 -13 18786.6 559.957   3
   2 -14  13 19155.2 641.959   1
  -2  14 -13 18187.0 630.850   1
  14 -12 -13 18598.3 638.054   2
  -2  14 -16 15907.8 466.217   3
  14 -12 -16 17104.4 564.235   1
  -2  14 -16 16563.6 567.657   1
  14 -12 -16 16222.3 586.075   2
  14 -12 -19 1233.46 124.843   1
  14 -12 -19 852.806 171.702   3
  14 -12 -19 1130.70 143.020   2
  -2  14 -19 1217.07 126.481   1
  14 -12 -22-159.125 166.398   3
  14 -12 -22-31.0709 90.7118   1
  12   2  22-61.1148 103.688   2
  14 -12 -22-69.3064 113.730   2
  -2  14 -22 18.0204 83.4948   1
  -2  14 -25 494.888 98.6204   1
  14 -12 -25 453.016 93.6259   1
  12   2  25 333.468 117.515   2
  14 -12 -25 391.696 127.019   2
  12   2  25 404.390 133.021   3
  14 -12 -28 1478.16 210.600   3
  -2  14 -28 1623.91 132.868   1
  14 -12 -28 1703.85 135.528   1
  14 -12 -28 1548.12 183.755   2
  12   2  28 1401.13 166.362   2
  14 -12 -31-96.2779 157.240   3
  14 -12 -31 81.2221 68.8898   1
  14 -12 -31-8.61998 116.866   2
  -2  14 -37 44.2197 103.396   2
  13   1 -39 8.88701 147.562   3
  13   1 -36 121.971 140.838   3
  13   1 -33 98.4103 86.3792   1
  13   1 -30 288.605 88.2738   1
  -1  14  30 235.507 84.5394   1
  -1  14  27-50.6435 88.0798   1
  14 -13  27 132.088 87.7124   1
  14 -13  24-6.77657 39.4575   3
  14 -13  24 70.2403 97.3382   1
  -1  14  24 19.8490 96.7953   1
  -1  14  21 2823.42 266.545   3
  14 -13  21 2607.39 184.900   1
  -1  14  21 2083.18 173.047   1
  14 -13  21 1936.75 104.093   3
  -1  14  18 15443.6 588.854   1
  14 -13  18 18404.5 603.430   1
  14 -13  15 21167.9 681.688   1
  -1  14  15 20869.3 764.537   3
  -1  14  12 42716.8 1334.07   3
  -1  14  12 40047.5 1276.20   1
  14 -13  12 44039.6 1268.61   1
  -1  14  12 41722.8 1273.38   2
  -1  14   9 38486.1 1178.87   3
  14 -13   9 37645.9 1118.24   1
  -1  14   6 8398.27 383.403   1
  14 -13   6 9076.58 371.131   1
  -1  14   6 9405.15 406.602   3
   1 -14  -6 8662.61 371.376   1
  -1  14   3 4040.42 247.195   1
  -1  14   3 4530.61 254.129   3
  -1  14   0 714.952 102.158   3
  -1  14   0 622.621 108.643   1
   1 -14   0 693.810 106.128   1
  14 -13   0 778.755 65.8630   2
  -1  14  -3 300.026 79.8055   3
   1 -14   3 115.678 80.2172   1
  14 -13  -3 183.965 51.6361   2
   1 -14   6 5036.78 266.474   1
  14 -13  -6 5011.19 228.078   2
  14 -13  -6 5153.24 258.820   1
  -1  14  -6 5433.38 247.100   3
  -1  14  -9 6229.54 300.276   1
  14 -13  -9 6698.31 299.327   1
  14 -13  -9 6116.95 279.069   2
  -1  14  -9 6665.03 270.864   3
  -1  14 -12 10849.8 432.383   1
  14 -13 -12 11036.8 429.811   2
  14 -13 -12 11528.1 432.559   1
  -1  14 -12 11397.6 385.379   3
  14 -13 -15 17192.7 704.805   3
  -1  14 -15 18611.3 636.300   1
  14 -13 -15 19167.4 656.602   2
  14 -13 -15 18940.9 636.039   1
  -1  14 -15 19196.2 566.973   3
  14 -13 -18 4589.34 314.599   3
  -1  14 -18 4719.46 241.802   1
  14 -13 -18 4588.69 267.131   2
  14 -13 -18 4875.03 245.261   1
  -1  14 -18 4655.37 170.168   3
  -1  14 -21-36.2183 86.6129   1
  14 -13 -21-9.33040 134.561   3
  13   1  21-47.8448 98.0534   2
  14 -13 -21 33.4904 101.350   2
  14 -13 -21-32.2372 89.6447   1
  14 -13 -24-87.9892 95.3133   1
  13   1  24-56.0150 94.3778   2
  14 -13 -24-116.493 117.320   2
  -1  14 -24-84.6280 85.9794   1
  13   1  24 8.17105 114.614   3
  14 -13 -27 133.951 117.998   2
  13   1  27 41.4691 100.407   2
  14 -13 -27 105.253 79.7120   1
  -1  14 -27 179.328 83.1682   1
  -1  14 -30-56.1246 80.4882   1
  14 -13 -30 45.4949 70.0957   1
  14 -13 -30-74.5670 140.568   3
  14 -13 -30-135.919 136.441   2
  13   1  30 24.9825 101.251   2
  14   0 -37 331.193 155.654   3
  14 -14  28 1188.28 144.717   1
   0  14  28 927.126 127.210   1
  14 -14  25 10978.2 404.949   1
   0  14  25 8575.68 384.349   1
   0  14  22 16611.5 633.278   1
  14 -14  22 20324.3 648.090   1
  14 -14  19 31168.9 921.815   1
   0  14  19 26520.1 921.462   1
   0  14  16 35424.0 1157.16   1
  14 -14  16 39239.2 1146.24   1
   0  14  13 22100.5 793.774   3
   0  14  13 21459.9 750.200   1
   0  14  13 20487.8 737.995   2
  14 -14  13 22930.0 729.047   1
   0  14  10 8732.03 406.686   3
  14 -14  10 8187.96 350.023   1
   0  14   7 4270.13 261.651   1
  14 -14   7 4523.10 243.343   1
   0  14   7 4780.45 280.763   3
  14 -14   4 10662.3 411.020   1
   0  14   4 9271.57 421.332   1
   0  14   4 10363.5 437.678   3
  14 -14   1 16389.0 566.856   1
   0  14   1 14824.6 579.252   1
   0  14   1 16369.0 587.718   3
  14 -14  -2 37895.5 1102.93   2
   0  14  -2 41141.0 1197.11   3
  14 -14  -5 66081.0 1892.23   1
  14 -14  -5 64528.4 1838.26   2
   0  14  -5 68252.3 1886.62   3
   0  14  -8 50377.3 1454.88   3
   0  14  -8 50078.9 1491.88   1
  14 -14  -8 51439.6 1484.75   1
  14 -14  -8 50115.3 1449.66   2
   0  14 -11 15860.7 562.399   1
  14 -14 -11 15273.4 552.355   1
  14 -14 -11 14684.2 606.324   3
  14 -14 -11 15449.8 544.827   2
   0  14 -11 16131.3 519.054   3
   0  14 -14 4925.39 257.250   1
   0  14 -14 5291.32 218.937   3
  14 -14 -14 4550.18 300.104   3
  14 -14 -14 5181.21 264.468   2
  14 -14 -14 5057.75 258.424   1
  14 -14 -17 814.594 146.353   3
  14 -14 -17 882.244 126.542   2
   0  14 -17 632.278 107.357   1
  14 -14 -17 672.187 108.100   1
   0  14 -17 794.586 75.7603   3
  14 -14 -20 354.959 130.843   3
  14 -14 -20 361.535 94.8690   1
  14 -14 -20 449.669 112.147   2
   0  14 -20 354.764 93.8634   1
   0  14 -23-81.3726 91.3069   1
  14 -14 -23 39.0073 118.771   3
   0  14 -23 40.2709 26.1692   3
  14   0  23 85.6569 78.1040   2
   0  14 -23 43.0331 25.2324   3
  14 -14 -23-72.2895 122.121   2
  14 -14 -23-18.6389 92.8037   1
  14   0  26 563.644 149.611   3
  14 -14 -26 507.159 140.291   2
  14 -14 -26 564.800 104.501   1
  14   0  26 861.385 123.834   2
   0  14 -26 524.272 102.374   1
  14 -14 -29 168.580 83.8410   1
  14 -14 -29 25.0436 137.067   2
  14   0  29 245.988 97.0878   2
   0  14 -29 257.155 88.4183   1
   0  14 -32-89.5932 93.0909   1
   1  14 -31-62.5617 97.2331   1
  14 -15 -28-92.7611 99.0937   1
  14 -15 -28 16.4671 115.021   2
   1  14 -28-126.348 92.5948   1
  15  -1  28-51.4751 100.390   2
   1  14 -25 480.278 100.149   1
  14 -15 -25 520.281 152.234   3
   1  14 -25 534.782 53.0815   3
  14 -15 -25 509.988 106.988   1
  14 -15 -25 392.167 128.039   2
  15  -1  25 636.112 112.571   2
  14 -15 -22 566.728 153.559   3
  15  -1  22 533.155 105.625   2
  14 -15 -22 398.940 121.100   2
   1  14 -22 562.686 100.470   1
  14 -15 -22 510.212 111.554   1
  14 -15 -19 40.2765 91.7889   1
  14 -15 -19 221.171 123.863   3
   1  14 -19 161.029 84.2327   1
  14 -15 -19 39.0983 96.1729   2
  14 -15 -16 708.636 143.732   3
   1  14 -16 731.770 110.305   1
  14 -15 -16 934.012 118.172   1
  14 -15 -16 743.819 118.162   2
  14 -15 -13 3044.72 200.208   1
  14 -15 -13 2792.95 234.310   3
  14 -15 -13 3229.63 200.461   2
   1  14 -13 3178.26 204.436   1
  14 -15 -10 5319.21 320.974   3
  14 -15 -10 5648.00 282.349   1
  14 -15 -10 6053.78 270.446   2
   1  14 -10 5570.65 284.317   1
   1  14  -7 16932.3 581.911   3
  14 -15  -7 16382.5 635.372   3
  14 -15  -7 17038.7 558.362   2
  14 -15  -7 17514.1 602.558   1
   1  14  -7 16280.3 601.956   1
  14 -15  -4 9307.01 420.931   3
   1  14  -4 10262.7 405.632   3
   1  14  -1 203.478 84.9540   1
  14 -15  -1 298.938 84.3838   1
   1  14  -1 268.606 87.0444   3
  14 -15   2 106.818 74.9786   1
   1  14   2 140.481 82.3544   1
   1  14   2 136.358 82.1020   3
   1  14   5 6.96402 96.0624   3
  14 -15   5-69.7035 92.8587   1
   1  14   5-52.5667 104.881   1
   1  14   8 467.459 116.370   3
   1  14   8 384.199 105.825   1
  14 -15   8 494.009 100.432   1
  14 -15  11 5198.36 269.625   1
   1  14  11 5633.61 322.612   3
   1  14  14 16781.0 659.478   3
  14 -15  14 16169.5 576.422   1
   1  14  14 15065.9 600.211   1
   1  14  17 16172.5 590.264   1
  14 -15  17 17569.1 568.961   1
   1  14  20 8912.14 407.730   1
  14 -15  20 10019.6 403.420   1
  14 -15  23 8780.34 362.271   1
   1  14  23 7482.39 356.737   1
  14 -15  26 1037.22 138.701   1
   1  14  26 815.911 127.418   1
   1  14  29 54.1716 95.6653   1
  15  -1 -35 147.261 145.548   3
   2  13 -32 23.6628 86.7375   1
   2  13 -29 1631.86 88.8444   3
  13 -15 -29 2031.04 211.761   2
  13 -15 -29 1858.88 144.053   1
  15  -2  29 1896.53 164.864   2
   2  13 -29 2041.14 150.536   1
  13 -15 -26 132.317 85.1572   1
  13 -15 -26 23.1894 124.565   2
  15  -2  26 159.581 86.2599   2
   2  13 -26 84.3980 78.7921   1
  15  -2  26 8.01541 133.891   3
  13 -15 -26 158.555 122.023   3
  13 -15 -23 518.749 145.098   3
  13 -15 -23 612.081 106.542   1
  13 -15 -23 565.652 132.906   2
   2  13 -23 598.128 100.076   1
  15  -2  23 529.076 105.836   2
   2  13 -20 1780.33 146.676   1
  13 -15 -20 1887.16 209.040   3
  13 -15 -20 1859.14 155.169   1
  15  -2  20 1521.93 147.507   2
  13 -15 -20 1956.14 181.094   2
   2  13 -17 41.6989 78.9301   1
  13 -15 -17-42.8309 104.329   3
  13 -15 -17 5.95762 94.7863   2
  13 -15 -17 19.7000 89.3189   1
   2  13 -14 58.1967 76.2123   1
  13 -15 -14 64.5248 81.2401   1
  13 -15 -14 80.5749 96.5530   3
  13 -15 -14 196.904 80.2787   2
  13 -15 -11 7.50512 86.8196   3
  13 -15 -11 9.47316 68.3096   2
  13 -15 -11-55.5237 85.7498   1
   2  13 -11 20.2484 74.4054   1
  13 -15  -8 519.687 118.886   3
  13 -15  -8 455.779 99.6601   1
   2  13  -8 336.131 92.1051   1
  13 -15  -5 3093.31 199.397   1
  13 -15  -5 3203.58 221.290   3
  13 -15  -2 7327.86 339.697   3
  13 -15   1 19091.4 661.156   3
  13 -15   1 19918.4 668.284   1
   2  13   1 19379.0 686.932   1
   2  13   1 20329.3 699.109   3
  13 -15   4 9190.88 378.947   1
  13 -15   4 8902.03 364.061   3
   2  13   4 9052.38 401.416   1
   2  13   4 10079.2 424.550   3
  13 -15   7 4840.54 248.443   1
  13 -15   7 4337.99 215.835   3
   2  13   7 4455.14 263.034   1
   2  13   7 4550.65 284.009   3
   2  13  10 698.235 141.446   3
   2  13  10 615.315 113.743   1
  13 -15  10 536.951 78.1529   3
  13 -15  10 540.916 102.600   1
   2  13  13 659.320 152.955   3
  13 -15  13 668.867 69.9875   3
  13 -15  13 904.441 121.698   1
   2  13  13 769.803 133.188   1
   2  13  16 895.193 141.443   1
   2  13  16 842.483 138.465   2
  13 -15  16 714.900 51.0413   3
  13 -15  16 941.924 130.992   1
   2  13  19 130.811 98.4781   1
   2  13  19-104.382 137.745   2
  13 -15  19-116.741 121.094   1
   2  13  22 512.888 115.353   1
  13 -15  22 284.246 112.681   1
  13 -15  25 1875.79 159.177   1
   2  13  25 1229.67 149.570   1
   2  13  28 3322.28 213.681   1
  13 -15  28 4039.64 227.918   1
   3  12 -33 348.071 95.0590   1
   3  12 -30 1373.49 107.617   3
  12 -15 -30 1578.38 193.806   2
  12 -15 -30 1733.59 133.691   1
  15  -3  30 1391.51 191.034   3
   3  12 -30 1900.50 138.151   1
   3  12 -27 6485.93 277.925   1
  12 -15 -27 6868.58 363.051   2
  12 -15 -27 6273.72 279.288   1
  15  -3  27 6609.06 298.625   2
  15  -3  27 6157.10 346.483   3
  12 -15 -24 6689.06 398.349   3
   3  12 -24 7364.09 303.323   1
  12 -15 -24 7542.90 378.080   2
  15  -3  24 7033.02 312.312   2
  12 -15 -24 7653.38 314.211   1
  12 -15 -21 7371.73 310.883   1
  12 -15 -21 7433.03 361.234   2
  15  -3  21 6937.41 302.035   2
   3  12 -21 6953.51 296.912   1
  12 -15 -21 6404.40 377.490   3
  12 -15 -18 4924.77 309.375   3
  12 -15 -18 4769.96 242.655   1
  12 -15 -18 5059.73 274.164   2
   3  12 -18 4687.69 239.076   1
  12 -15 -15 994.993 153.359   3
  12 -15 -15 1041.61 129.173   2
  12 -15 -15 1129.72 126.047   1
   3  12 -15 1214.96 122.701   1
  12 -15 -12 2134.43 193.099   3
   3  12 -12 2104.96 153.802   1
  12 -15 -12 1937.38 154.589   1
  12 -15  -9 4181.08 256.891   3
   3  12  -9 4127.08 225.639   1
  12 -15  -9 4010.42 226.152   1
  12 -15  -6 25272.9 849.034   3
  12 -15  -6 25741.1 816.248   1
  12 -15  -3 78871.9 2238.64   3
  12 -15   0 76687.0 2255.16   3
   3  12   0 82286.5 2284.64   1
  12 -15   0 82949.6 2266.40   1
  12 -15   3 74253.2 2176.50   3
   3  12   3 80239.5 2230.66   1
  12 -15   3 81344.2 2208.03   1
  12 -15   6 41697.9 1260.00   3
   3  12   6 43785.4 1337.52   1
  12 -15   6 45577.8 1308.50   1
   3  12   6 47624.5 1378.05   3
  12 -15   9 8957.41 324.501   3
   3  12   9 9362.00 406.553   1
  12 -15   9 9836.67 387.489   1
   3  12   9 9951.85 446.956   3
  12 -15  12 3122.92 135.578   3
   3  12  12 3046.80 215.146   1
  12 -15  12 3372.16 201.182   1
  12 -15  15 344.468 102.623   1
   3  12  15 279.350 112.875   1
   3  12  18 1128.99 174.637   3
   3  12  18 729.060 135.731   2
  12 -15  18 821.839 125.050   1
   3  12  18 743.039 125.449   1
   3  12  21 7700.18 420.839   3
  12 -15  21 8181.42 339.645   1
   3  12  21 7263.27 373.165   2
   3  12  21 7446.92 350.011   1
  12 -15  24 8574.50 349.750   1
   3  12  24 7274.61 343.047   1
   3  12  27 3937.75 237.874   1
  12 -15  27 5348.88 256.972   1
   3  12  30 3450.34 202.989   1
  15  -4  31 951.125 166.051   3
  11 -15 -31 1001.39 109.945   1
   4  11 -31 848.977 105.459   3
   4  11 -31 1212.22 115.540   1
   4  11 -28 2576.34 157.199   1
  15  -4  28 1941.44 206.571   3
  11 -15 -28 2373.89 155.606   1
  15  -4  28 2243.94 168.509   2
  11 -15 -25 828.536 165.443   3
   4  11 -25 756.378 100.992   1
  11 -15 -25 952.123 108.618   1
  15  -4  25 770.089 112.372   2
  11 -15 -22 22.1225 72.3838   1
  11 -15 -22 62.5936 105.294   3
  15  -4  22-55.2975 88.0187   2
   4  11 -22 56.3095 70.2115   1
  11 -15 -19 65.9805 104.724   3
  15  -4  19-37.1550 68.3674   2
  11 -15 -19-50.2347 74.9361   1
   4  11 -19 41.2860 70.1377   1
  11 -15 -16 155.034 96.4457   3
  11 -15 -16 55.9765 69.8411   1
   4  11 -16-12.8756 69.1577   1
  11 -15 -13 1818.55 176.405   3
  11 -15 -13 1677.29 141.573   1
   4  11 -13 1677.28 137.893   1
  11 -15 -10 5369.58 296.434   3
   4  11 -10 5389.32 259.462   1
  11 -15 -10 5804.47 269.369   1
  11 -15  -7 13991.1 537.078   3
   4  11  -7 14248.2 510.437   1
  11 -15  -7 14439.2 511.659   1
  11 -15  -4 43007.0 1291.13   3
   4  11  -1 47097.7 1373.09   1
  11 -15  -1 46527.9 1360.63   1
  11 -15  -1 45316.8 1354.88   3
  11 -15   2 39167.1 1191.97   3
   4  11   2 40379.2 1232.04   1
  11 -15   5 20848.5 668.061   3
   4  11   5 22204.3 733.269   1
  11 -15   5 22615.3 714.296   1
  11 -15   8 1625.73 105.751   3
   4  11   8 1702.20 155.990   1
  11 -15   8 1881.42 147.201   1
   4  11   8 1984.58 180.543   3
  11 -15  11 323.417 45.7879   3
   4  11  11 220.818 86.7130   1
  11 -15  11 247.859 80.6530   1
  11 -15  14 766.820 104.733   1
   4  11  14 647.642 115.015   1
   4  11  17 467.615 126.742   3
  11 -15  17 499.067 101.965   1
   4  11  17 366.571 107.934   2
   4  11  17 298.271 105.508   1
  11 -15  20 468.579 100.255   1
   4  11  20 391.555 137.981   3
   4  11  20 448.845 114.503   2
   4  11  20 346.936 101.915   1
  11 -15  23 4289.78 228.659   1
   4  11  23 3418.37 224.722   1
   4  11  26 504.342 100.778   1
  11 -15  26 604.652 111.889   1
   4  11  29 436.231 98.0299   1
  15  -4 -35 187.773 165.602   3
   5  10 -32 936.363 116.713   3
   5  10 -32 1288.27 111.824   1
  10 -15 -32 1069.75 184.098   3
   5  10 -29 426.226 85.1158   1
  10 -15 -29 363.059 84.7283   1
  15  -5  29 253.044 115.273   3
  10 -15 -26 65.9908 113.561   3
  10 -15 -26 28.4583 70.5922   1
  15  -5  26-160.171 114.636   3
   5  10 -26 64.2367 71.0037   1
  15  -5  26 29.1789 70.8145   2
  10 -15 -23 1964.67 146.849   1
   5  10 -23 1989.18 142.038   1
  10 -15 -23 1652.24 197.139   3
  10 -15 -20 8147.82 412.703   3
   5  10 -20 8080.43 323.027   1
  15  -5  20 7957.78 305.530   2
  10 -15 -20 8249.57 334.249   1
  10 -15 -17 11347.1 504.962   3
  15  -5  17 11874.3 405.549   2
   5  10 -17 11736.5 428.135   1
  10 -15 -17 12444.4 443.742   1
  10 -15 -14 7454.57 310.584   1
   5  10 -14 6679.94 296.427   1
  10 -15 -14 7014.58 354.550   3
  10 -15 -11 155.112 80.5474   3
   5  10 -11 145.787 64.3803   1
  10 -15 -11 246.040 70.6493   1
  10 -15  -8 2215.58 174.324   3
   5  10  -8 2280.00 156.516   1
  10 -15  -8 2540.71 166.090   1
  10 -15  -5 1330.53 128.238   3
  10 -15  -5 1359.17 123.447   1
 -10  15   5 1366.36 106.576   2
  10 -15  -2 595.468 85.0578   3
 -10  15   2 574.094 67.9730   2
  10 -15   1 5848.26 268.053   3
   5  10   1 6664.77 299.386   1
  10 -15   1 6829.83 294.046   1
 -10  15  -1 6641.07 238.354   2
  10 -15   4 17827.9 577.283   3
   5  10   4 18725.6 633.981   1
  10 -15   4 18632.6 614.840   1
 -10  15  -4 18252.3 536.887   2
   5  10   7 22524.7 739.070   1
  10 -15   7 23889.2 721.423   1
  10 -15  10 11114.7 403.210   1
   5  10  10 10831.9 427.594   1
 -10  15 -10 10367.2 293.882   2
  10 -15  13 821.717 104.847   1
   5  10  13 756.058 112.423   1
  10 -15  16 1697.10 146.545   1
   5  10  16 1801.30 162.458   1
   5  10  16 1519.66 180.648   3
  10 -15  19 76.3671 86.1966   1
   5  10  19 140.947 122.814   3
   5  10  19 232.913 105.925   2
   5  10  19 96.6931 86.5373   1
   5  10  22 252.719 117.166   2
   5  10  22 322.851 102.526   1
  10 -15  22 268.181 95.5365   1
   5  10  22 404.790 145.470   3
  10 -15  25 1661.95 150.897   1
   5  10  25 1305.47 147.232   1
  10 -15  28 1128.94 136.092   1
   5  10  28 866.125 120.125   1
  15  -5 -34-50.3400 160.187   3
   6   9 -33-138.862 107.223   3
   6   9 -33 109.977 69.8220   1
  15  -6  30-18.8127 95.8815   3
   9 -15 -30-70.8251 68.7542   1
   6   9 -30 71.8461 68.2686   1
   9 -15 -27 653.711 98.1048   1
   6   9 -27 744.401 99.6097   1
  15  -6  27 439.592 119.341   3
   9 -15 -24 1795.21 141.864   1
   6   9 -24 1876.37 135.424   1
  15  -6  24 1590.02 129.122   2
   9 -15 -21 3923.97 281.430   3
   6   9 -21 4041.08 205.648   1
   9 -15 -21 4510.74 223.537   1
  15  -6  21 4161.09 194.484   2
   6   9 -18 3911.97 205.939   1
  15  -6  18 4279.04 187.097   2
   9 -15 -18 4395.63 224.368   1
   9 -15 -18 3984.64 271.034   3
   6   9 -15 3007.83 176.715   1
   9 -15 -15 3299.62 188.525   1
   9 -15 -15 2819.52 216.344   3
   9 -15 -12 7711.50 369.160   3
   6   9 -12 8105.50 328.627   1
   9 -15 -12 8003.44 331.106   1
   6   9  -9 3743.47 201.709   1
   9 -15  -9 3831.08 231.641   3
   9 -15  -9 3908.96 211.028   1
  -9  15   9 3755.23 198.116   2
   9 -15  -6 5274.84 249.417   1
   9 -15  -6 4683.73 252.338   3
  -9  15   6 5262.30 227.575   2
   9 -15  -3 16550.2 586.551   3
  -9  15   3 17947.3 552.723   2
   6   9   0 9197.91 377.872   1
  -9  15   0 9887.94 332.480   2
   9 -15   0 8881.81 359.574   3
   9 -15   3 19687.8 633.468   1
   6   9   3 18728.0 638.964   1
  -9  15  -3 19352.5 564.231   2
   9 -15   3 17809.6 592.922   3
   9 -15   6 23045.5 714.003   1
   6   9   6 22143.9 726.821   1
  -9  15  -6 22242.8 630.679   2
   9 -15   6 20439.4 652.583   3
   6   9   9 18470.7 658.393   1
   9 -15   9 19920.9 642.301   1
   6   9  12 23162.1 804.697   1
   9 -15  12 25708.7 786.825   1
   6   9  15 19129.5 701.539   1
   6   9  15 20440.9 751.055   3
   9 -15  18 27610.8 837.614   1
   6   9  18 26765.4 923.012   3
   6   9  21 8947.28 396.576   1
   6   9  21 9627.48 422.638   2
  -9  15 -21 8543.58 279.138   2
   6   9  21 9162.14 452.297   3
   9 -15  24 6526.80 282.978   1
   6   9  24 5906.51 292.387   1
  -9  15 -27 3309.28 148.602   2
   6   9  27 3123.99 207.083   1
   6   9  30 577.340 103.697   1
  15  -6 -30 640.406 180.687   3
  -9  15 -30 503.036 75.5562   2
  15  -6 -33 441.057 168.704   3
   7   8 -34-180.677 118.395   3
   7   8 -34 19.6484 63.4839   1
   7   8 -31 664.015 93.3831   1
   8 -15 -28 869.466 106.820   1
   7   8 -28 864.348 100.067   1
  15  -7  28 604.644 117.066   3
   8 -15 -25 737.852 106.609   1
   7   8 -25 764.404 98.6671   1
  15  -7  25 473.938 119.092   3
   8 -15 -25 762.134 157.309   3
   7   8 -22 978.861 104.565   1
   8 -15 -22 779.464 105.259   1
   8 -15 -22 866.715 156.165   3
   8 -15 -19 789.840 143.600   3
   7   8 -19 883.907 103.437   1
   8 -15 -19 869.999 109.654   1
  15  -7  19 860.516 77.7982   2
   7   8 -16 1772.62 135.191   1
  -8  15  16 1749.43 150.742   2
  15  -7  16 1667.05 101.974   2
   8 -15 -16 1689.82 138.400   1
   8 -15 -16 1400.03 162.054   3
   8 -15 -13 667.190 116.873   3
   7   8 -13 862.840 98.3167   1
   8 -15 -13 798.523 99.9086   1
  -8  15  13 813.385 106.573   2
  -8  15  10 6953.56 296.413   2
   8 -15 -10 7181.19 303.111   1
   7   8 -10 7075.20 297.403   1
   8 -15 -10 6492.79 321.869   3
  -8  15   7 26299.5 800.626   2
   8 -15  -7 28040.6 829.599   1
   7   8  -7 25894.2 815.995   1
  -8  15   4 18597.2 569.235   2
   8 -15  -4 16461.0 591.918   3
  -8  15   1 12337.6 393.145   2
   8 -15  -1 11251.4 426.342   1
   8 -15  -1 10956.4 410.895   3
   7   8  -1 11198.4 427.195   1
  -8  15  -2 4309.65 178.768   2
   8 -15   2 3982.92 194.989   3
   8 -15   2 4308.80 219.052   1
   7   8   2 3713.07 211.331   1
   7   8   5 644.954 93.2801   1
   8 -15   5 509.858 83.7477   1
  -8  15  -5 586.178 60.5322   2
   8 -15   5 452.509 62.1888   3
   8 -15   8 41.6373 58.7563   1
   7   8   8 52.7150 61.7234   1
   7   8  11 2258.02 173.128   1
   8 -15  11 2328.14 158.760   1
   7   8  14 12421.5 496.782   1
   8 -15  14 13266.8 472.331   1
   7   8  17 10684.9 455.709   1
   8 -15  17 12171.3 437.742   1
   7   8  17 11356.7 503.792   3
   7   8  20 16991.7 625.959   1
   7   8  20 17813.8 651.263   2
   8 -15  20 18071.2 598.784   1
   7   8  20 16886.9 681.112   3
   8 -15  23 7334.27 316.356   1
   7   8  23 6671.15 331.648   1
   7   8  23 7216.49 364.774   2
   7   8  23 7253.44 400.547   3
   8 -15  26 1170.57 134.898   1
   7   8  26 990.979 132.920   1
  -8  15 -26 756.513 89.5170   2
   8 -15  29 163.379 98.3460   1
  15  -7 -29 285.477 152.659   3
   7   8  29 161.902 90.0890   1
  -8  15 -29 19.1670 67.3920   2
  15  -7 -29 162.650 138.192   2
  -8  15 -32 765.906 96.6193   2
  15  -7 -32 805.680 174.551   2
   8   7 -35-6.13387 108.761   3
   8   7 -32 362.681 85.7890   1
   7 -15 -32 313.070 136.016   3
   8   7 -29 230.686 73.1918   1
   7 -15 -26-38.1768 77.3184   1
   8   7 -26-37.4179 70.0031   1
  15  -8  26-97.4296 90.4667   3
   7 -15 -26-45.1183 119.632   3
   7 -15 -23 44.0193 74.3620   1
   8   7 -23-7.62773 70.8424   1
   7 -15 -23-25.6995 113.041   3
   8   7 -20 80.7700 67.5175   1
   7 -15 -20 124.072 77.4127   1
   7 -15 -20 200.994 108.562   3
   8   7 -17 2406.78 160.924   1
   7 -15 -17 2374.68 161.532   1
   7 -15 -17 2067.31 195.421   3
  15  -8  17 2393.29 114.440   2
  -7  15  17 2482.40 183.657   2
   8   7 -14 586.905 88.8114   1
  15  -8  14 404.284 52.5402   2
   7 -15 -14 432.537 84.2817   1
  -7  15  14 680.408 97.9000   2
   7 -15 -14 601.808 114.947   3
   8   7 -11 293.521 71.1270   1
  -7  15  11 280.067 74.3195   1
   7 -15 -11 426.717 80.9399   1
  -7  15  11 298.312 81.6115   2
   7 -15 -11 350.684 95.4171   3
  -7  15   8 669.518 94.5546   1
  -7  15   8 573.583 83.3828   2
   7 -15  -8 762.613 95.5664   1
   7 -15  -8 647.474 100.453   3
  -7  15   5 663.436 85.1724   2
  -7  15   5 665.958 93.4943   1
   7 -15  -5 861.912 103.291   1
   7 -15  -5 635.367 92.9838   3
  -7  15   2 6079.11 280.719   1
  -7  15   2 6129.34 245.326   2
   7 -15  -2 5362.06 256.132   3
   7 -15   1 1741.40 123.052   3
  -7  15  -1 2044.70 121.620   2
  -7  15  -1 1946.31 148.505   1
   7 -15   1 1855.30 141.099   1
   7 -15   4 4905.31 241.588   1
  -7  15  -7 3499.75 205.042   1
   7 -15   7 3528.70 198.183   1
  -7  15 -10 24.6641 54.9722   1
   7 -15  10 60.7096 61.3467   1
   7 -15  13 1142.72 118.814   1
   8   7  13 1042.28 126.546   1
   7 -15  16 3325.96 195.943   1
   8   7  16 3168.59 218.394   1
   8   7  19 2096.85 187.217   1
   7 -15  19 2453.44 172.790   1
   8   7  19 2053.12 208.786   3
   8   7  22 246.109 107.127   1
   7 -15  22 106.687 95.3444   1
   8   7  22-152.391 130.341   2
   8   7  22 74.5825 125.396   3
   7 -15  25 226.191 99.4131   1
   8   7  25 289.822 100.769   1
   8   7  25 166.363 123.375   2
   7 -15  28 468.511 107.252   1
  15  -8 -28 504.615 166.243   3
   8   7  28 299.969 94.0253   1
  -7  15 -28 381.873 75.4088   2
  15  -8 -28 456.878 140.171   2
  15  -8 -31 303.840 83.6533   1
  15  -8 -31 64.2726 120.702   2
  15  -8 -31 208.995 151.368   3
  -7  15 -31 148.522 71.6376   2
  15  -8 -34 224.801 152.651   3
  -7  15 -34 171.777 81.3014   2
   9   6 -36-81.3787 136.982   3
   9   6 -33 289.266 79.3998   1
   9   6 -30 1011.97 107.423   1
   9   6 -27 2291.18 149.645   1
  15  -9  27 2277.35 162.267   1
   6 -15 -24 2279.82 161.924   1
   9   6 -24 2043.95 146.894   1
   6 -15 -24 1992.83 207.728   3
   9   6 -21 57.9700 75.1337   1
   6 -15 -21 86.2086 78.3988   1
   6 -15 -21 136.732 109.068   3
  -6  15  21 122.279 94.9786   2
   6 -15 -18 3333.62 191.040   1
  -6  15  18 3145.23 208.387   2
   9   6 -18 2952.35 176.901   1
  -6  15  15 9430.57 391.981   1
   6 -15 -15 10294.2 394.996   1
  -6  15  15 10730.6 416.967   2
  15  -9  15 10348.3 302.206   2
   6 -15 -15 9640.57 434.971   3
  -6  15  12 9681.82 386.697   1
   6 -15 -12 10354.4 388.064   1
  15  -9  12 9439.66 289.616   2
  -6  15  12 10572.9 396.518   2
   6 -15 -12 9714.31 417.156   3
  -6  15   9 961.151 133.425   3
   6 -15  -9 997.199 107.319   1
  -6  15   9 1080.48 108.844   2
   6 -15  -9 997.197 121.413   3
  -6  15   9 863.518 107.489   1
  -6  15   6 10629.1 419.835   3
  -6  15   6 9852.71 365.308   2
   6 -15  -6 9315.54 373.435   1
  -6  15   6 9290.30 382.351   1
   6 -15  -6 9111.02 379.796   3
  -6  15   3 22588.4 712.151   2
  -6  15   3 21968.9 746.581   1
   6 -15   0 18425.9 615.278   1
  -6  15   0 18156.6 629.367   1
   6 -15   3 11926.2 443.558   1
   6 -15   6 2863.46 179.082   1
   6 -15   9 1836.31 143.101   1
  -6  15  -9 1575.30 134.719   1
  -6  15 -12 1099.63 118.557   1
   6 -15  12 1223.75 120.812   1
   6 -15  15 545.839 98.7655   1
  -6  15 -15 486.650 92.6376   1
   9   6  18 157.424 91.2136   1
   6 -15  18 47.3678 85.1121   1
   9   6  18 214.419 111.756   3
   9   6  21 299.658 107.797   1
   6 -15  21 106.473 101.819   1
   9   6  21 153.044 98.6050   2
   9   6  21 160.902 109.161   3
   6 -15  24 1774.15 157.654   1
   9   6  24 1364.78 155.001   1
   9   6  24 1700.43 176.989   2
  15  -9 -24 1760.65 194.264   2
   9   6  24 1726.92 198.321   3
   9   6  27 2461.19 188.792   1
  15  -9 -27 2569.75 263.547   3
  15  -9 -27 2744.73 235.356   2
  15  -9 -27 2948.87 178.154   1
   6 -15  27 2969.27 196.220   1
  15  -9 -30 339.607 85.8046   1
  15  -9 -30 147.183 147.576   3
  -6  15 -30 255.113 78.6631   2
   9   6  30 142.564 81.7800   1
  15  -9 -30 267.139 130.053   2
  15  -9 -33-129.837 174.327   3
  -6  15 -33-35.1561 76.8526   2
  10   5 -37-170.047 133.169   3
  10   5 -34-79.4975 117.177   3
  10   5 -31 192.096 78.6023   1
  10   5 -28-23.2877 73.0989   1
  15 -10  28 51.8459 74.2134   1
  15 -10  25 143.399 86.1655   1
  15 -10  25 15.8566 89.3761   3
  10   5 -25 166.715 77.8363   1
  10   5 -22 210.455 80.8034   1
   5 -15 -22 94.0250 84.0962   1
  -5  15  22 159.482 109.440   2
  -5  15  19 4727.14 250.190   1
   5 -15 -19 5777.20 262.751   1
  -5  15  19 5102.21 282.543   2
   5 -15 -19 4794.95 299.220   3
  -5  15  16 4652.01 241.215   1
   5 -15 -16 4979.63 246.037   1
  -5  15  16 5252.02 313.668   3
  -5  15  16 4813.22 262.836   2
   5 -15 -16 4427.07 274.181   3
   5 -15 -13 7139.67 309.909   1
  -5  15  13 7206.72 321.674   2
  -5  15  13 6555.15 308.984   1
  -5  15  10 8065.28 363.246   3
   5 -15 -10 7578.81 307.387   1
  -5  15  10 7302.15 313.777   1
  -5  15  10 7220.38 305.893   2
  -5  15   7 139.371 81.7004   3
   5 -15  -7 135.062 66.8912   1
  -5  15   7 97.1458 63.0188   2
  -5  15   7 127.935 71.0619   1
  -5  15   4 693.160 103.651   3
  -5  15   4 543.912 83.4951   2
  -5  15   4 534.726 91.2168   1
  -5  15   1 200.213 75.1400   3
   5 -15  -1 204.386 75.6329   1
  -5  15   1 237.893 75.7243   1
  -5  15  -2 278.949 68.7303   3
   5 -15   2 366.503 79.6092   1
  -5  15  -2 263.769 79.5130   1
  -5  15  -5 4014.51 194.312   3
   5 -15   5 4041.59 219.475   1
  -5  15  -8 5802.08 284.823   1
   5 -15   8 6272.43 284.085   1
   5 -15  11 5608.06 264.338   1
  -5  15 -11 4849.53 256.855   1
   5 -15  14 7069.88 308.668   1
  -5  15 -14 6683.51 308.057   1
   5 -15  17 4721.79 247.458   1
  -5  15 -17 4439.69 240.210   1
  -5  15 -20 307.219 93.7079   1
   5 -15  20 333.548 93.3572   1
  10   5  20 213.211 111.495   3
  15 -10 -20 383.231 126.004   2
  10   5  23-96.3695 113.353   1
   5 -15  23-119.884 109.330   1
  10   5  23-44.8871 106.186   2
  15 -10 -23-44.6565 113.428   2
  10   5  23-109.251 149.790   3
  10   5  26-71.5489 105.177   1
  15 -10 -26-93.4519 153.757   3
  15 -10 -26 55.8560 78.3034   1
  10   5  26 92.9911 92.7740   2
  15 -10 -26-40.0923 116.087   2
  15 -10 -29 275.775 159.524   3
  10   5  29 158.526 89.3326   1
  15 -10 -29 395.298 89.6021   1
  15 -10 -29 311.904 132.218   2
  15 -10 -32-228.290 184.714   3
  15 -10 -32-73.9695 130.787   2
  -5  15 -35-52.6651 87.0585   2
  11   4 -35 31.1553 149.009   3
  11   4 -32 249.522 82.4350   1
  11   4 -29 574.775 96.4530   1
  15 -11  26 263.090 70.4136   3
  11   4 -26 413.477 92.3308   1
  15 -11  26 220.111 91.8282   1
  -4  15  23 3567.17 218.269   1
  15 -11  23 4498.28 238.392   1
  -4  15  20 5752.68 285.108   1
  -4  15  20 6143.43 320.435   2
   4 -15 -20 6729.19 296.293   1
   4 -15 -17 6769.79 299.391   1
  -4  15  17 6555.75 366.922   3
  -4  15  17 5656.98 285.739   1
  -4  15  17 6029.58 311.681   2
   4 -15 -14 5794.29 276.615   1
  -4  15  14 5413.43 277.977   1
  -4  15  14 6062.12 296.508   2
  -4  15  11 1141.36 123.670   1
  -4  15  11 1253.86 152.880   3
   4 -15 -11 1383.67 132.013   1
  -4  15  11 1288.68 130.330   2
   4 -15  -8 2909.10 188.246   1
  -4  15   8 3161.40 192.475   2
  -4  15   8 2838.35 193.495   1
  -4  15   5 9473.28 393.526   3
   4 -15  -5 8409.22 357.104   1
  -4  15   5 8277.85 367.359   1
  15 -11   5 8704.51 272.408   2
  -4  15   2 20459.3 672.601   3
  -4  15   2 18112.0 662.286   1
  -4  15  -1 29258.4 879.427   3
   4 -15   1 27097.0 877.823   1
  -4  15  -1 27049.9 894.696   1
  -4  15  -4 31347.4 915.885   3
   4 -15   4 28513.8 929.545   1
  -4  15  -7 40520.6 1125.19   3
   4 -15   7 38550.8 1171.97   1
  -4  15  -7 36622.8 1173.62   1
   4 -15  10 21923.0 709.250   1
  -4  15 -10 21206.5 629.598   3
  -4  15 -10 20352.4 705.079   1
   4 -15  13 14696.2 523.420   1
  -4  15 -13 13635.0 512.987   1
  15 -11 -13 14428.2 529.295   2
   4 -15  16 16393.7 561.863   1
  -4  15 -16 14786.3 548.336   1
  15 -11 -16 15522.3 576.779   2
  -4  15 -19 10862.6 416.999   1
  15 -11 -19 10058.1 445.504   2
   4 -15  19 11028.2 427.639   1
  11   4  22 6498.18 371.589   3
  11   4  22 6601.19 329.699   2
  15 -11 -22 6856.08 298.853   1
  -4  15 -22 6650.13 300.420   1
  15 -11 -22 6055.72 343.013   2
  15 -11 -25 2381.53 169.033   1
  11   4  25 2174.13 191.439   2
  15 -11 -25 2233.73 214.589   2
  11   4  25 2026.58 189.556   1
  11   4  28 928.598 137.669   1
  15 -11 -28 1102.93 125.806   1
  15 -11 -28 1115.93 204.317   3
  15 -11 -28 1158.84 182.134   2
  15 -11 -31 298.400 93.4448   1
  15 -11 -31 294.824 170.551   3
  15 -11 -31 288.404 148.089   2
  12   3 -36-157.349 179.737   3
  12   3 -33-41.2610 90.1440   1
  12   3 -30 180.661 86.9726   1
  15 -12  27 50.7160 86.6597   1
  12   3 -27 101.781 77.6893   1
  -3  15  24 1743.24 157.857   1
  15 -12  24 1964.30 171.760   1
  15 -12  24 1810.51 117.232   3
  15 -12  21 4371.71 240.899   1
  -3  15  21 3559.44 224.442   1
  -3  15  18 8954.25 394.786   1
  -3  15  18 9732.62 432.205   2
  -3  15  15 9384.34 444.851   3
  -3  15  15 8983.29 389.724   2
  -3  15  15 8188.61 369.131   1
   3 -15 -15 9035.40 373.813   1
   3 -15 -12 10578.0 418.851   1
  -3  15  12 10046.0 420.663   2
  -3  15  12 10146.0 424.229   1
   3 -15  -9 6562.99 308.606   1
  -3  15   9 6871.98 351.397   3
  -3  15   9 6823.73 308.237   2
  -3  15   9 6388.90 315.702   1
   3 -15  -6 7901.43 351.034   1
  -3  15   6 9011.24 393.957   3
  -3  15   6 8033.58 365.434   1
  -3  15   3 13621.3 506.575   3
  15 -12   3 13039.6 390.640   2
  -3  15   0 19699.3 648.007   3
   3 -15   0 18369.8 637.518   1
  -3  15   0 17513.1 647.670   1
  15 -12   0 18514.7 562.139   2
  -3  15  -3 18706.0 610.135   3
   3 -15   3 17587.3 622.335   1
  15 -12  -3 17709.3 565.232   2
  -3  15  -6 15476.4 519.055   3
   3 -15   6 15273.2 556.022   1
  15 -12  -6 15473.7 515.638   2
   3 -15   9 34089.7 1053.61   1
  -3  15  -9 34985.0 995.178   3
  -3  15  -9 32435.5 1052.57   1
  15 -12  -9 34459.2 1029.56   2
   3 -15  12 26821.5 839.222   1
  -3  15 -12 25334.4 746.179   3
  -3  15 -12 25566.0 831.353   1
  15 -12 -12 26062.7 828.926   2
  -3  15 -15 18138.3 519.131   3
  15 -12 -15 17860.0 641.739   2
  -3  15 -15 18832.8 632.977   1
   3 -15  15 19804.3 645.559   1
  -3  15 -18 15745.6 561.249   1
  15 -12 -18 15546.8 596.993   2
  15 -12 -18 16364.2 562.458   1
   3 -15  18 16814.7 581.730   1
  15 -12 -21 8046.54 449.617   3
  12   3  21 7956.03 365.058   2
  15 -12 -21 8646.80 352.121   1
  -3  15 -21 8543.51 352.430   1
  15 -12 -21 8035.47 393.553   2
  -3  15 -24 4055.86 222.522   1
  12   3  24 3841.56 249.833   2
  15 -12 -24 4039.29 221.312   1
  15 -12 -24 3907.38 270.946   2
  12   3  24 3829.92 285.345   3
  15 -12 -27 287.056 95.7409   1
  12   3  27 291.792 123.663   2
  15 -12 -27 253.481 133.946   2
  12   3  27 208.709 113.209   1
  15 -12 -30 185.282 157.822   3
  15 -12 -30 104.544 140.399   2
  12   3  30 96.3617 93.3446   1
  15 -12 -30 135.474 90.1374   1
  -3  15 -36 134.143 94.0914   2
  13   2 -37-237.498 166.157   3
  13   2 -31-112.600 96.3959   1
  -2  15  28-65.6520 106.357   1
  15 -13  28-28.0679 100.986   1
  15 -13  25-156.096 116.444   1
  -2  15  22 325.277 113.834   1
  15 -13  22 494.953 127.127   1
  15 -13  22 553.560 68.4723   3
  -2  15  19 4786.55 270.800   1
  15 -13  19 5814.10 285.887   1
  -2  15  16 5469.52 334.992   3
  -2  15  16 4962.27 283.380   2
  -2  15  16 4674.49 267.851   1
  15 -13  16 5749.99 280.488   1
  -2  15  13 2321.55 211.928   3
  -2  15  13 2053.80 177.441   2
  -2  15  13 2105.18 176.215   1
  15 -13  13 2104.77 172.106   1
   2 -15 -10 18983.8 661.090   1
  -2  15  10 17926.0 669.362   1
  -2  15  10 19380.8 661.139   2
  -2  15   7 11535.7 479.266   1
  -2  15   7 13006.6 510.419   3
   2 -15  -7 11853.5 466.064   1
  -2  15   4 7814.49 361.468   3
  -2  15   4 7578.60 357.072   1
  -2  15   1 13968.0 554.729   1
  15 -13   1 15288.1 460.226   2
   2 -15  -1 14248.8 547.958   1
  -2  15  -2 107.790 69.6168   3
   2 -15   2 164.182 79.1010   1
  -2  15  -2-42.5745 93.3363   1
  15 -13  -2 92.8279 44.7048   2
  -2  15  -5 370.960 82.4396   3
   2 -15   5 129.787 92.2114   1
  15 -13  -5 176.913 62.6108   2
  -2  15  -8 1722.61 156.027   1
  15 -13  -8 1524.09 128.207   2
  -2  15  -8 1598.20 124.584   3
   2 -15   8 1778.40 156.410   1
  -2  15 -11 7560.58 285.093   3
  -2  15 -11 7118.61 334.674   1
  15 -13 -11 7491.33 323.403   2
   2 -15  11 7748.93 344.536   1
  15 -13 -14 16701.7 580.242   1
  -2  15 -14 16152.7 579.110   1
  15 -13 -14 16551.6 589.977   2
  -2  15 -17 14835.8 436.624   3
  15 -13 -17 14761.8 631.393   3
  15 -13 -17 16415.3 553.225   1
  15 -13 -17 16087.1 577.336   2
  -2  15 -17 15936.8 549.549   1
  -2  15 -20 8406.06 350.553   1
  15 -13 -20 7729.59 430.724   3
  15 -13 -20 7978.47 381.107   2
  15 -13 -20 8139.27 344.530   1
  15 -13 -23 1377.23 203.820   3
  15 -13 -23 1397.91 143.331   1
  -2  15 -23 1317.06 138.085   1
  13   2  23 1450.64 158.868   2
  15 -13 -23 1340.88 175.720   2
  13   2  23 1381.74 191.474   3
  -2  15 -26-13.7853 85.9596   1
  15 -13 -26-107.994 96.2953   1
  13   2  26 24.4294 104.050   2
  15 -13 -26-78.4342 127.157   2
  13   2  29-128.800 120.400   1
  15 -13 -29 87.4622 133.876   3
  15 -13 -29-84.7403 136.955   2
  15 -13 -29-4.25170 97.6282   1
  -2  15 -29 4.29029 84.2231   1
  14   1 -32 30.2358 83.3621   1
  -1  15  29 138.549 93.8532   1
  -1  15  26 83.4947 92.8334   1
  15 -14  26 204.346 102.497   1
  -1  15  23 1954.32 173.276   1
  15 -14  23 1769.93 85.3892   3
  15 -14  20 7985.31 348.039   1
  -1  15  20 6644.01 335.650   1
  -1  15  17 3724.90 283.068   3
  -1  15  17 2972.11 213.955   1
  -1  15  17 3137.16 231.752   2
  15 -14  17 3706.05 231.421   1
[truncated: 235,235 more chars]
