# Supplementary material for: Russian Doll-like 3d–4f Cluster Wheels with Slow Relaxation of Magnetization
Source: Molecules. 2023 Aug 6;28(15):5906. doi: 10.3390/molecules28155906 (PMC10421525; doi:10.3390/molecules28155906)
Supplement: Supplementary file 1 [file molecules-28-05906-s001.zip › CCDC 2252493.cif]

 
data_20191011-CZL-PY-2-2
 
_audit_creation_method            'SHELXL-2014/7'
_shelx_SHELXL_version_number      '2014/7'
_chemical_name_systematic         ?
_chemical_name_common             ?
_chemical_melting_point           ?
_chemical_formula_moiety          
 'C144 H114 Cl13 N12 Ni6 O30 Tb7, 2(Cl)'
_chemical_formula_sum
 'C144 H114 Cl15 N12 Ni6 O30 Tb7' 
_chemical_formula_weight          4488.92

loop_
 _atom_type_symbol
 _atom_type_description
 _atom_type_scat_dispersion_real
 _atom_type_scat_dispersion_imag
 _atom_type_scat_source
 'C'  'C'   0.0033   0.0016
 'International Tables Vol C Tables 4.2.6.8 and 6.1.1.4'
 'H'  'H'   0.0000   0.0000
 'International Tables Vol C Tables 4.2.6.8 and 6.1.1.4'
 'N'  'N'   0.0061   0.0033
 'International Tables Vol C Tables 4.2.6.8 and 6.1.1.4'
 'O'  'O'   0.0106   0.0060
 'International Tables Vol C Tables 4.2.6.8 and 6.1.1.4'
 'Cl'  'Cl'   0.1484   0.1585
 'International Tables Vol C Tables 4.2.6.8 and 6.1.1.4'
 'Tb'  'Tb'  -0.1723   4.1537
 'International Tables Vol C Tables 4.2.6.8 and 6.1.1.4'
 'Ni'  'Ni'   0.3393   1.1124
 'International Tables Vol C Tables 4.2.6.8 and 6.1.1.4'
 
_space_group_crystal_system       trigonal
_space_group_IT_number            148
_space_group_name_H-M_alt         'R -3 :H'
_space_group_name_Hall            '-R 3'
 
_shelx_space_group_comment
;
The symmetry employed for this shelxl refinement is uniquely defined
by the following loop, which should always be used as a source of
symmetry information in preference to the above space-group names.
They are only intended as comments.
;
 
loop_
 _space_group_symop_operation_xyz
 'x, y, z'
 '-y, x-y, z'
 '-x+y, -x, z'
 'x+2/3, y+1/3, z+1/3'
 '-y+2/3, x-y+1/3, z+1/3'
 '-x+y+2/3, -x+1/3, z+1/3'
 'x+1/3, y+2/3, z+2/3'
 '-y+1/3, x-y+2/3, z+2/3'
 '-x+y+1/3, -x+2/3, z+2/3'
 '-x, -y, -z'
 'y, -x+y, -z'
 'x-y, x, -z'
 '-x+2/3, -y+1/3, -z+1/3'
 'y+2/3, -x+y+1/3, -z+1/3'
 'x-y+2/3, x+1/3, -z+1/3'
 '-x+1/3, -y+2/3, -z+2/3'
 'y+1/3, -x+y+2/3, -z+2/3'
 'x-y+1/3, x+2/3, -z+2/3'
 
_cell_length_a                    20.5601(7)
_cell_length_b                    20.5601(7)
_cell_length_c                    32.526(3)
_cell_angle_alpha                 90
_cell_angle_beta                  90
_cell_angle_gamma                 120
_cell_volume                      11907.2(13)
_cell_formula_units_Z             3
_cell_measurement_temperature     153(2)
_cell_measurement_reflns_used     7620
_cell_measurement_theta_min       3.8800
_cell_measurement_theta_max       28.1720
 
_exptl_crystal_description        block
_exptl_crystal_colour             ?
_exptl_crystal_density_meas       ?
_exptl_crystal_density_method     ?
_exptl_crystal_density_diffrn     1.878          
_exptl_crystal_F_000              6540
_exptl_transmission_factor_min    ?
_exptl_transmission_factor_max    ?
_exptl_crystal_size_max           0.250
_exptl_crystal_size_mid           0.210
_exptl_crystal_size_min           0.180
_exptl_absorpt_coefficient_mu     4.090
_shelx_estimated_absorpt_T_min    0.428
_shelx_estimated_absorpt_T_max    0.526
_exptl_absorpt_correction_type    multi-scan
_exptl_absorpt_correction_T_min   0.374
_exptl_absorpt_correction_T_max   0.479
_exptl_absorpt_process_details
;
CrysAlisPro 1.171.38.43 (Rigaku Oxford Diffraction, 2015)
Empirical absorption correction using spherical harmonics,
 implemented in SCALE3 ABSPACK scaling algorithm.
;
_exptl_absorpt_special_details    ?
_diffrn_ambient_temperature       153(2)
_diffrn_radiation_wavelength      0.71073
_diffrn_radiation_type            MoK\a
_diffrn_source                    'micro-focus sealed X-ray tube'
_diffrn_measurement_device_type   'SuperNova, Single source at offset, Eos'
_diffrn_measurement_method        '\w scans'
_diffrn_detector_area_resol_mean  ?
_diffrn_reflns_number             15569
_diffrn_reflns_av_unetI/netI      0.0448
_diffrn_reflns_av_R_equivalents   0.0435
_diffrn_reflns_limit_h_min        -24
_diffrn_reflns_limit_h_max        24
_diffrn_reflns_limit_k_min        -21
_diffrn_reflns_limit_k_max        22
_diffrn_reflns_limit_l_min        -38
_diffrn_reflns_limit_l_max        37
_diffrn_reflns_theta_min          3.393
_diffrn_reflns_theta_max          25.019
_diffrn_reflns_theta_full         25.019
_diffrn_measured_fraction_theta_max   0.997
_diffrn_measured_fraction_theta_full  0.997
_diffrn_reflns_Laue_measured_fraction_max    0.997
_diffrn_reflns_Laue_measured_fraction_full   0.997
_diffrn_reflns_point_group_measured_fraction_max   0.997
_diffrn_reflns_point_group_measured_fraction_full  0.997
_reflns_number_total              4671
_reflns_number_gt                 3601
_reflns_threshold_expression      'I > 2\s(I)'
_reflns_Friedel_coverage          0.000
_reflns_Friedel_fraction_max      .
_reflns_Friedel_fraction_full     .
 
_reflns_special_details
;
 Reflections were merged by SHELXL according to the crystal
 class for the calculation of statistics and refinement.
 
 _reflns_Friedel_fraction is defined as the number of unique
 Friedel pairs measured divided by the number that would be
 possible theoretically, ignoring centric projections and
 systematic absences.
;
 
_computing_data_collection        'CrysAlisPro 1.171.38.43 (Rigaku OD, 2015)'
_computing_cell_refinement        'CrysAlisPro 1.171.38.43 (Rigaku OD, 2015)'
_computing_data_reduction         'CrysAlisPro 1.171.38.43 (Rigaku OD, 2015)'
_computing_structure_solution     'SHELXS-97 (Sheldrick, 2008)'
_computing_structure_refinement   'SHELXL-2014/7 (Sheldrick, 2014)'
_computing_molecular_graphics     ?
_computing_publication_material   ?
_refine_special_details           ?
_refine_ls_structure_factor_coef  Fsqd
_refine_ls_matrix_type            full
_refine_ls_weighting_scheme       calc
_refine_ls_weighting_details
'w=1/[\s^2^(Fo^2^)+(0.0597P)^2^+397.9586P] where P=(Fo^2^+2Fc^2^)/3'
_atom_sites_solution_primary      ?
_atom_sites_solution_secondary    ?
_atom_sites_solution_hydrogens    mixed
_refine_ls_hydrogen_treatment     constr
_refine_ls_extinction_method      none
_refine_ls_extinction_coef        .
_refine_ls_number_reflns          4671
_refine_ls_number_parameters      358
_refine_ls_number_restraints      311
_refine_ls_R_factor_all           0.0796
_refine_ls_R_factor_gt            0.0595
_refine_ls_wR_factor_ref          0.1639
_refine_ls_wR_factor_gt           0.1435
_refine_ls_goodness_of_fit_ref    1.038
_refine_ls_restrained_S_all       1.078
_refine_ls_shift/su_max           0.000
_refine_ls_shift/su_mean          0.000
 
loop_
 _atom_site_label
 _atom_site_type_symbol
 _atom_site_fract_x
 _atom_site_fract_y
 _atom_site_fract_z
 _atom_site_U_iso_or_equiv
 _atom_site_adp_type
 _atom_site_occupancy
 _atom_site_site_symmetry_order  
 _atom_site_calc_flag
 _atom_site_refinement_flags_posn
 _atom_site_refinement_flags_adp
 _atom_site_refinement_flags_occupancy
 _atom_site_disorder_assembly
 _atom_site_disorder_group
Tb1 Tb 0.47637(2) 0.30997(2) 0.33201(2) 0.0549(2) Uani 1 1 d . . . . .
Tb2 Tb 0.6667 0.3333 0.30279(6) 0.0449(4) Uani 0.5 3 d S T P . .
Ni1 Ni 0.36124(7) 0.15071(7) 0.29421(4) 0.0492(4) Uani 1 1 d . . . . .
O1 O 0.4010(3) 0.3456(4) 0.3634(2) 0.0510(16) Uani 1 1 d . U . . .
C1 C 0.3291(5) 0.3070(5) 0.3750(4) 0.050(2) Uani 1 1 d . U . . .
C2 C 0.3121(6) 0.2921(6) 0.4164(4) 0.063(2) Uani 1 1 d . U . . .
H2 H 0.3517 0.3112 0.4360 0.076 Uiso 1 1 calc R U . . .
C3 C 0.2384(7) 0.2499(7) 0.4299(4) 0.074(3) Uani 1 1 d . U . . .
H3 H 0.2280 0.2396 0.4583 0.089 Uiso 1 1 calc R U . . .
C4 C 0.1819(6) 0.2235(7) 0.4025(4) 0.075(3) Uani 1 1 d . U . . .
H4 H 0.1314 0.1941 0.4116 0.090 Uiso 1 1 calc R U . . .
C5 C 0.1967(6) 0.2387(6) 0.3617(4) 0.066(3) Uani 1 1 d . U . . .
H5 H 0.1557 0.2205 0.3431 0.079 Uiso 1 1 calc R U . . .
C6 C 0.2713(5) 0.2810(5) 0.3455(4) 0.050(2) Uani 1 1 d . U . . .
C7 C 0.2806(6) 0.2958(6) 0.3013(4) 0.055(2) Uani 1 1 d . U . . .
C8 C 0.2400(7) 0.3240(7) 0.2816(4) 0.075(3) Uani 1 1 d . U . . .
H8 H 0.2088 0.3359 0.2977 0.090 Uiso 1 1 calc R U . . .
C9 C 0.2431(8) 0.3356(8) 0.2394(5) 0.085(3) Uani 1 1 d . U . . .
H9 H 0.2146 0.3551 0.2270 0.102 Uiso 1 1 calc R U . . .
C10 C 0.2869(8) 0.3190(8) 0.2165(5) 0.085(3) Uani 1 1 d . U . . .
H10 H 0.2893 0.3263 0.1876 0.102 Uiso 1 1 calc R U . . .
C11 C 0.3282(7) 0.2913(7) 0.2346(4) 0.073(3) Uani 1 1 d . U . . .
H11 H 0.3585 0.2793 0.2178 0.087 Uiso 1 1 calc R U . . .
C12 C 0.3273(6) 0.2801(6) 0.2774(4) 0.058(2) Uani 1 1 d . U . . .
O2 O 0.3709(3) 0.2553(4) 0.2937(2) 0.0520(17) Uani 1 1 d . U . . .
O3 O 0.4766(4) 0.2164(4) 0.2879(3) 0.0588(18) Uani 1 1 d . U . . .
C13 C 0.4870(14) 0.2247(13) 0.2447(7) 0.160(8) Uani 1 1 d . U . . .
H13A H 0.4740 0.2618 0.2349 0.239 Uiso 1 1 calc R U . . .
H13B H 0.4546 0.1763 0.2313 0.239 Uiso 1 1 calc R U . . .
H13C H 0.5396 0.2417 0.2381 0.239 Uiso 1 1 calc R U . . .
N1 N 0.3225(8) 0.1229(7) 0.2320(4) 0.096(4) Uani 1 1 d D U . . .
C14 C 0.2702(13) 0.0758(15) 0.2163(9) 0.216(10) Uani 1 1 d D U . . .
C15 C 0.2104(15) 0.0086(15) 0.1941(10) 0.247(11) Uani 1 1 d D U . . .
H15A H 0.1767 -0.0286 0.2142 0.371 Uiso 1 1 calc R U . . .
H15B H 0.2338 -0.0135 0.1771 0.371 Uiso 1 1 calc R U . . .
H15C H 0.1817 0.0238 0.1766 0.371 Uiso 1 1 calc R U . . .
N2 N 0.2607(3) 0.0967(4) 0.3236(2) 0.066(2) Uani 1 1 d G U . . .
C16 C 0.1897(4) 0.0566(4) 0.3061(2) 0.090(3) Uani 1 1 d G U . . .
H16 H 0.1844 0.0534 0.2770 0.108 Uiso 1 1 calc R U . . .
C17 C 0.1265(3) 0.0212(5) 0.3311(3) 0.099(4) Uani 1 1 d G U . . .
H17 H 0.0780 -0.0062 0.3191 0.118 Uiso 1 1 calc R U . . .
C18 C 0.1343(4) 0.0259(5) 0.3736(3) 0.097(3) Uani 1 1 d G U . . .
H18 H 0.0911 0.0017 0.3907 0.116 Uiso 1 1 calc R U . . .
C19 C 0.2053(5) 0.0660(5) 0.3911(2) 0.082(3) Uani 1 1 d G U . . .
C20 C 0.2685(4) 0.1014(4) 0.3662(2) 0.066(2) Uani 1 1 d G U . . .
C21 C 0.3420(8) 0.1449(6) 0.3809(4) 0.066(2) Uani 1 1 d . U . . .
C22 C 0.3471(9) 0.1486(8) 0.4235(5) 0.096(3) Uani 1 1 d D U . . .
C23 C 0.2832(8) 0.1117(9) 0.4487(5) 0.109(4) Uani 1 1 d D U . . .
H23 H 0.2885 0.1151 0.4777 0.131 Uiso 1 1 calc R U . . .
C24 C 0.2128(7) 0.0706(8) 0.4314(4) 0.104(3) Uani 1 1 d D U . . .
O4 O 0.3988(4) 0.1778(4) 0.3551(2) 0.0535(17) Uani 1 1 d . U . . .
Cl1 Cl 0.1578(10) 0.0388(12) 0.4756(4) 0.125(4) Uani 0.50(2) 1 d D U P A 1
Cl1' Cl 0.1224(11) 0.0199(7) 0.4564(7) 0.153(6) Uani 0.50(2) 1 d D U P A 2
Cl2 Cl 0.4367(4) 0.2025(3) 0.44323(17) 0.162(2) Uani 1 1 d . U . . .
O5 O 0.6047(6) 0.3742(6) 0.3179(4) 0.036(2) Uani 0.5 1 d . U P B 1
H51 H 0.5998 0.3815 0.2884 0.055 Uiso 0.5 1 d R U P B 1
O5' O 0.5911(7) 0.3841(7) 0.2907(5) 0.047(3) Uani 0.5 1 d . U P B 2
H52 H 0.5872 0.3824 0.2722 0.071 Uiso 0.5 1 d R U P B 2
Cl3 Cl 0.6267(9) 0.3096(8) 0.2222(4) 0.030(3) Uani 0.1333 1 d . U P C 1
Cl3' Cl 0.6667 0.3333 0.2378(12) 0.034(7) Uani 0.1 3 d S TU P B 2
Cl4 Cl 0.035(4) -0.097(4) 0.235(2) 0.248(19) Uani 0.1667 1 d . U P D 1
Cl4' Cl 0.001(4) -0.128(4) 0.202(2) 0.247(19) Uani 0.1667 1 d . U P E 2
 
loop_
 _atom_site_aniso_label
 _atom_site_aniso_U_11
 _atom_site_aniso_U_22
 _atom_site_aniso_U_33
 _atom_site_aniso_U_23
 _atom_site_aniso_U_13
 _atom_site_aniso_U_12
Tb1 0.0256(3) 0.0284(3) 0.1112(5) -0.0034(2) -0.0014(2) 0.01385(19)
Tb2 0.0282(5) 0.0282(5) 0.0785(12) 0.000 0.000 0.0141(2)
Ni1 0.0396(7) 0.0355(6) 0.0738(9) -0.0021(6) -0.0030(6) 0.0196(5)
O1 0.032(3) 0.046(3) 0.074(4) -0.002(3) 0.000(3) 0.018(3)
C1 0.037(4) 0.034(4) 0.086(6) 0.003(4) 0.005(4) 0.022(3)
C2 0.048(5) 0.052(5) 0.088(6) 0.005(5) 0.006(5) 0.023(4)
C3 0.053(5) 0.062(5) 0.099(7) 0.002(5) 0.019(5) 0.022(4)
C4 0.043(5) 0.062(5) 0.111(7) -0.002(5) 0.021(5) 0.020(4)
C5 0.036(4) 0.056(5) 0.107(6) -0.003(5) 0.001(5) 0.023(4)
C6 0.036(4) 0.036(4) 0.090(5) -0.003(4) -0.011(4) 0.027(3)
C7 0.044(4) 0.050(4) 0.081(5) -0.002(4) -0.013(4) 0.031(3)
C8 0.066(5) 0.074(6) 0.103(6) -0.003(5) -0.015(5) 0.049(5)
C9 0.085(6) 0.084(6) 0.107(7) 0.002(6) -0.017(6) 0.057(5)
C10 0.085(6) 0.081(6) 0.099(7) 0.002(6) -0.010(6) 0.050(5)
C11 0.068(5) 0.067(5) 0.093(6) -0.002(5) -0.003(5) 0.041(5)
C12 0.047(5) 0.047(4) 0.087(6) -0.002(4) -0.006(4) 0.030(4)
O2 0.037(3) 0.047(3) 0.081(4) -0.005(3) -0.005(3) 0.027(3)
O3 0.043(4) 0.042(3) 0.100(5) 0.009(3) 0.017(3) 0.028(3)
C13 0.151(15) 0.152(15) 0.179(13) 0.004(13) 0.023(13) 0.079(12)
N1 0.134(8) 0.075(6) 0.109(7) -0.008(5) -0.004(6) 0.076(6)
C14 0.200(12) 0.215(12) 0.204(12) -0.033(9) -0.011(9) 0.083(8)
C15 0.224(15) 0.243(15) 0.223(16) -0.056(12) -0.023(13) 0.077(11)
N2 0.044(4) 0.043(4) 0.113(6) -0.007(4) -0.009(4) 0.022(3)
C16 0.047(5) 0.066(6) 0.139(8) -0.010(6) -0.013(5) 0.015(5)
C17 0.050(5) 0.069(6) 0.160(8) -0.002(7) -0.004(6) 0.017(5)
C18 0.069(6) 0.066(6) 0.153(8) 0.013(6) 0.019(6) 0.032(5)
C19 0.085(5) 0.060(5) 0.117(6) 0.011(5) 0.021(5) 0.049(4)
C20 0.069(5) 0.045(4) 0.097(6) 0.000(4) 0.008(5) 0.039(4)
C21 0.091(6) 0.053(5) 0.073(6) -0.003(5) 0.001(5) 0.051(5)
C22 0.134(7) 0.079(6) 0.092(6) -0.004(5) -0.009(6) 0.065(5)
C23 0.141(7) 0.093(6) 0.096(6) 0.003(5) 0.015(5) 0.060(5)
C24 0.121(6) 0.090(5) 0.109(6) 0.010(5) 0.033(5) 0.060(5)
O4 0.051(4) 0.042(3) 0.068(4) -0.005(3) -0.009(3) 0.024(3)
Cl1 0.142(8) 0.164(9) 0.089(7) 0.037(6) 0.029(6) 0.092(7)
Cl1' 0.173(10) 0.098(6) 0.135(10) -0.010(6) 0.098(8) 0.028(7)
Cl2 0.233(6) 0.134(4) 0.125(4) -0.047(3) -0.106(4) 0.097(4)
O5 0.035(5) 0.031(5) 0.051(6) -0.003(5) 0.003(5) 0.023(4)
O5' 0.041(5) 0.041(5) 0.061(6) 0.002(5) 0.001(5) 0.021(4)
Cl3 0.047(6) 0.024(6) 0.027(6) -0.007(5) -0.011(5) 0.023(5)
Cl3' 0.042(8) 0.042(8) 0.017(12) 0.000 0.000 0.021(4)
Cl4 0.25(2) 0.25(2) 0.25(2) 0.007(15) 0.000(15) 0.121(16)
Cl4' 0.25(2) 0.25(2) 0.25(2) 0.006(15) 0.005(15) 0.123(16)
 
_geom_special_details
;
 All esds (except the esd in the dihedral angle between two l.s. planes)
 are estimated using the full covariance matrix.  The cell esds are taken
 into account individually in the estimation of esds in distances, angles
 and torsion angles; correlations between esds in cell parameters are only
 used when they are defined by crystal symmetry.  An approximate (isotropic)
 treatment of cell esds is used for estimating esds involving l.s. planes.
;
 
loop_
 _geom_bond_atom_site_label_1
 _geom_bond_atom_site_label_2
 _geom_bond_distance
 _geom_bond_site_symmetry_2
 _geom_bond_publ_flag
Tb1 O2 2.254(6) . ?
Tb1 O1 2.262(6) . ?
Tb1 O5 2.330(11) . ?
Tb1 O3 2.351(7) 17 ?
Tb1 O5 2.364(11) 18_545 ?
Tb1 O3 2.401(7) . ?
Tb1 O5' 2.469(13) . ?
Tb1 O4 2.482(7) . ?
Tb1 O5' 2.519(13) 18_545 ?
Tb1 O4 2.596(7) 17 ?
Tb1 Ni1 3.1758(13) . ?
Tb1 Ni1 3.2112(13) 17 ?
Tb2 O5 1.908(11) 2_655 ?
Tb2 O5 1.908(11) 3_665 ?
Tb2 O5 1.908(11) . ?
Tb2 Tb2 1.987(4) 16_655 ?
Tb2 Cl3' 2.11(4) . ?
Tb2 O5' 2.298(13) 3_665 ?
Tb2 O5' 2.298(13) 2_655 ?
Tb2 O5' 2.298(13) . ?
Tb2 O5 2.374(13) 17 ?
Tb2 O5 2.374(13) 18_545 ?
Tb2 O5 2.374(13) 16_655 ?
Tb2 Cl3 2.716(14) 2_655 ?
Tb2 H51 2.1092 . ?
Tb2 H52 2.5141 . ?
Ni1 N2 2.031(6) . ?
Ni1 O2 2.059(6) . ?
Ni1 O1 2.070(6) 18_545 ?
Ni1 O3 2.071(7) . ?
Ni1 O4 2.096(7) . ?
Ni1 N1 2.144(13) . ?
Ni1 Tb1 3.2112(13) 18_545 ?
O1 C1 1.337(11) . ?
O1 Ni1 2.070(6) 17 ?
C1 C2 1.386(16) . ?
C1 C6 1.407(14) . ?
C2 C3 1.387(15) . ?
C2 H2 0.9500 . ?
C3 C4 1.344(18) . ?
C3 H3 0.9500 . ?
C4 C5 1.364(18) . ?
C4 H4 0.9500 . ?
C5 C6 1.432(14) . ?
C5 H5 0.9500 . ?
C6 C7 1.465(15) . ?
C7 C8 1.386(14) . ?
C7 C12 1.392(15) . ?
C8 C9 1.390(19) . ?
C8 H8 0.9500 . ?
C9 C10 1.337(19) . ?
C9 H9 0.9500 . ?
C10 C11 1.369(17) . ?
C10 H10 0.9500 . ?
C11 C12 1.409(17) . ?
C11 H11 0.9500 . ?
C12 O2 1.342(11) . ?
O3 C13 1.42(2) . ?
O3 Tb1 2.351(7) 18_545 ?
C13 H13A 0.9800 . ?
C13 H13B 0.9800 . ?
C13 H13C 0.9800 . ?
N1 C14 1.146(9) . ?
C14 C15 1.498(9) . ?
C15 H15A 0.9800 . ?
C15 H15B 0.9800 . ?
C15 H15C 0.9800 . ?
N2 C16 1.3900 . ?
N2 C20 1.3900 . ?
C16 C17 1.3900 . ?
C16 H16 0.9500 . ?
C17 C18 1.3900 . ?
C17 H17 0.9500 . ?
C18 C19 1.3900 . ?
C18 H18 0.9500 . ?
C19 C24 1.316(15) . ?
C19 C20 1.3900 . ?
C20 C21 1.401(14) . ?
C21 O4 1.318(14) . ?
C21 C22 1.388(18) . ?
C22 C23 1.405(9) . ?
C22 Cl2 1.731(17) . ?
C23 C24 1.379(9) . ?
C23 H23 0.9500 . ?
C24 Cl1 1.741(9) . ?
C24 Cl1' 1.809(9) . ?
O4 Tb1 2.596(7) 18_545 ?
O5 Tb1 2.364(11) 17 ?
O5 Tb2 2.374(13) 16_655 ?
O5 H51 0.9846 . ?
O5' Tb1 2.518(13) 17 ?
O5' H52 0.6030 . ?
Cl3 Cl3 1.24(3) 3_665 ?
Cl3 Cl3 1.24(3) 2_655 ?
 
loop_
 _geom_angle_atom_site_label_1
 _geom_angle_atom_site_label_2
 _geom_angle_atom_site_label_3
 _geom_angle
 _geom_angle_site_symmetry_1
 _geom_angle_site_symmetry_3
 _geom_angle_publ_flag
O2 Tb1 O1 76.5(2) . . ?
O2 Tb1 O5 135.0(4) . . ?
O1 Tb1 O5 132.1(3) . . ?
O2 Tb1 O3 146.0(2) . 17 ?
O1 Tb1 O3 71.9(2) . 17 ?
O5 Tb1 O3 65.3(4) . 17 ?
O2 Tb1 O5 131.6(3) . 18_545 ?
O1 Tb1 O5 139.8(4) . 18_545 ?
O5 Tb1 O5 53.1(5) . 18_545 ?
O3 Tb1 O5 81.9(3) 17 18_545 ?
O2 Tb1 O3 69.9(2) . . ?
O1 Tb1 O3 143.6(2) . . ?
O5 Tb1 O3 83.2(3) . . ?
O3 Tb1 O3 143.6(3) 17 . ?
O5 Tb1 O3 64.0(3) 18_545 . ?
O2 Tb1 O5' 112.9(4) . . ?
O1 Tb1 O5' 130.0(3) . . ?
O3 Tb1 O5' 79.6(4) 17 . ?
O3 Tb1 O5' 77.6(3) . . ?
O2 Tb1 O4 71.9(2) . . ?
O1 Tb1 O4 92.8(2) . . ?
O5 Tb1 O4 127.3(3) . . ?
O3 Tb1 O4 121.3(2) 17 . ?
O5 Tb1 O4 75.1(3) 18_545 . ?
O3 Tb1 O4 63.9(2) . . ?
O5' Tb1 O4 137.1(3) . . ?
O2 Tb1 O5' 132.7(3) . 18_545 ?
O1 Tb1 O5' 118.1(4) . 18_545 ?
O3 Tb1 O5' 75.0(3) 17 18_545 ?
O3 Tb1 O5' 77.7(4) . 18_545 ?
O5' Tb1 O5' 91.8(6) . 18_545 ?
O4 Tb1 O5' 63.1(3) . 18_545 ?
O2 Tb1 O4 94.2(2) . 17 ?
O1 Tb1 O4 68.4(2) . 17 ?
O5 Tb1 O4 73.5(3) . 17 ?
O3 Tb1 O4 62.8(2) 17 17 ?
O5 Tb1 O4 125.0(3) 18_545 17 ?
O3 Tb1 O4 126.8(2) . 17 ?
O5' Tb1 O4 62.2(3) . 17 ?
O4 Tb1 O4 159.2(2) . 17 ?
O5' Tb1 O4 133.0(3) 18_545 17 ?
O2 Tb1 Ni1 40.24(16) . . ?
O1 Tb1 Ni1 103.33(16) . . ?
O5 Tb1 Ni1 123.8(3) . . ?
O3 Tb1 Ni1 162.41(18) 17 . ?
O5 Tb1 Ni1 92.5(3) 18_545 . ?
O3 Tb1 Ni1 40.70(16) . . ?
O5' Tb1 Ni1 114.5(3) . . ?
O4 Tb1 Ni1 41.24(16) . . ?
O5' Tb1 Ni1 93.4(3) 18_545 . ?
O4 Tb1 Ni1 132.20(16) 17 . ?
O2 Tb1 Ni1 106.14(16) . 17 ?
O1 Tb1 Ni1 39.91(16) . 17 ?
O5 Tb1 Ni1 92.2(3) . 17 ?
O3 Tb1 Ni1 40.09(16) 17 17 ?
O5 Tb1 Ni1 122.0(3) 18_545 17 ?
O3 Tb1 Ni1 167.28(18) . 17 ?
O5' Tb1 Ni1 93.5(3) . 17 ?
O4 Tb1 Ni1 127.25(17) . 17 ?
O5' Tb1 Ni1 112.0(3) 18_545 17 ?
O4 Tb1 Ni1 40.60(16) 17 17 ?
Ni1 Tb1 Ni1 141.81(3) . 17 ?
O5 Tb2 O5 113.6(3) 2_655 3_665 ?
O5 Tb2 O5 113.6(3) 2_655 . ?
O5 Tb2 O5 113.6(3) 3_665 . ?
O5 Tb2 Tb2 75.1(4) 2_655 16_655 ?
O5 Tb2 Tb2 75.1(4) 3_665 16_655 ?
O5 Tb2 Tb2 75.1(4) . 16_655 ?
Tb2 Tb2 Cl3' 180.0 16_655 . ?
Tb2 Tb2 O5' 99.9(4) 16_655 3_665 ?
Cl3' Tb2 O5' 80.1(4) . 3_665 ?
Tb2 Tb2 O5' 99.9(4) 16_655 2_655 ?
Cl3' Tb2 O5' 80.1(4) . 2_655 ?
O5' Tb2 O5' 117.1(2) 3_665 2_655 ?
Tb2 Tb2 O5' 99.9(4) 16_655 . ?
Cl3' Tb2 O5' 80.1(4) . . ?
O5' Tb2 O5' 117.1(2) 3_665 . ?
O5' Tb2 O5' 117.1(2) 2_655 . ?
O5 Tb2 O5 126.0(3) 2_655 17 ?
O5 Tb2 O5 57.5(3) 3_665 17 ?
O5 Tb2 O5 57.5(3) . 17 ?
Tb2 Tb2 O5 51.0(3) 16_655 17 ?
O5 Tb2 O5 57.5(3) 2_655 18_545 ?
O5 Tb2 O5 126.0(3) 3_665 18_545 ?
O5 Tb2 O5 57.5(3) . 18_545 ?
Tb2 Tb2 O5 51.0(3) 16_655 18_545 ?
O5 Tb2 O5 84.5(4) 17 18_545 ?
O5 Tb2 O5 57.5(3) 2_655 16_655 ?
O5 Tb2 O5 57.5(3) 3_665 16_655 ?
O5 Tb2 O5 126.0(3) . 16_655 ?
Tb2 Tb2 O5 50.9(3) 16_655 16_655 ?
O5 Tb2 O5 84.5(4) 17 16_655 ?
O5 Tb2 O5 84.5(4) 18_545 16_655 ?
O5 Tb2 Cl3 96.8(5) 2_655 2_655 ?
O5 Tb2 Cl3 97.1(5) 3_665 2_655 ?
O5 Tb2 Cl3 120.2(5) . 2_655 ?
Tb2 Tb2 Cl3 164.7(3) 16_655 2_655 ?
O5 Tb2 Cl3 135.4(4) 17 2_655 ?
O5 Tb2 Cl3 135.1(4) 18_545 2_655 ?
O5 Tb2 Cl3 113.8(4) 16_655 2_655 ?
O5 Tb2 H51 123.3 2_655 . ?
O5 Tb2 H51 120.5 3_665 . ?
O5 Tb2 H51 27.8 . . ?
Tb2 Tb2 H51 102.8 16_655 . ?
O5 Tb2 H51 75.2 17 . ?
O5 Tb2 H51 77.2 18_545 . ?
O5 Tb2 H51 153.8 16_655 . ?
Cl3 Tb2 H51 92.4 2_655 . ?
Tb2 Tb2 H52 113.3 16_655 . ?
Cl3' Tb2 H52 66.7 . . ?
O5' Tb2 H52 113.7 3_665 . ?
O5' Tb2 H52 111.5 2_655 . ?
O5' Tb2 H52 13.5 . . ?
N2 Ni1 O2 96.6(3) . . ?
N2 Ni1 O1 96.0(3) . 18_545 ?
O2 Ni1 O1 159.9(3) . 18_545 ?
N2 Ni1 O3 157.5(3) . . ?
O2 Ni1 O3 80.6(2) . . ?
O1 Ni1 O3 81.7(3) 18_545 . ?
N2 Ni1 O4 80.8(3) . . ?
O2 Ni1 O4 84.3(3) . . ?
O1 Ni1 O4 82.4(3) 18_545 . ?
O3 Ni1 O4 76.7(3) . . ?
N2 Ni1 N1 99.1(4) . . ?
O2 Ni1 N1 95.7(3) . . ?
O1 Ni1 N1 97.6(3) 18_545 . ?
O3 Ni1 N1 103.5(5) . . ?
O4 Ni1 N1 179.8(4) . . ?
N2 Ni1 Tb1 114.3(2) . . ?
O2 Ni1 Tb1 45.01(18) . . ?
O1 Ni1 Tb1 115.18(18) 18_545 . ?
O3 Ni1 Tb1 49.1(2) . . ?
O4 Ni1 Tb1 51.32(19) . . ?
N1 Ni1 Tb1 128.8(3) . . ?
N2 Ni1 Tb1 117.7(2) . 18_545 ?
O2 Ni1 Tb1 115.45(18) . 18_545 ?
O1 Ni1 Tb1 44.52(18) 18_545 18_545 ?
O3 Ni1 Tb1 47.0(2) . 18_545 ?
O4 Ni1 Tb1 53.71(19) . 18_545 ?
N1 Ni1 Tb1 126.4(3) . 18_545 ?
Tb1 Ni1 Tb1 70.73(3) . 18_545 ?
C1 O1 Ni1 132.3(6) . 17 ?
C1 O1 Tb1 131.9(6) . . ?
Ni1 O1 Tb1 95.6(2) 17 . ?
O1 C1 C2 119.2(10) . . ?
O1 C1 C6 120.3(10) . . ?
C2 C1 C6 120.5(9) . . ?
C1 C2 C3 121.3(12) . . ?
C1 C2 H2 119.4 . . ?
C3 C2 H2 119.4 . . ?
C4 C3 C2 119.9(13) . . ?
C4 C3 H3 120.1 . . ?
C2 C3 H3 120.1 . . ?
C3 C4 C5 120.2(11) . . ?
C3 C4 H4 119.9 . . ?
C5 C4 H4 119.9 . . ?
C4 C5 C6 123.0(11) . . ?
C4 C5 H5 118.5 . . ?
C6 C5 H5 118.5 . . ?
C1 C6 C5 115.1(11) . . ?
C1 C6 C7 126.5(9) . . ?
C5 C6 C7 118.3(9) . . ?
C8 C7 C12 118.0(11) . . ?
C8 C7 C6 119.8(10) . . ?
C12 C7 C6 122.1(9) . . ?
C7 C8 C9 122.8(12) . . ?
C7 C8 H8 118.6 . . ?
C9 C8 H8 118.6 . . ?
C10 C9 C8 119.0(12) . . ?
C10 C9 H9 120.5 . . ?
C8 C9 H9 120.5 . . ?
C9 C10 C11 120.2(14) . . ?
C9 C10 H10 119.9 . . ?
C11 C10 H10 119.9 . . ?
C10 C11 C12 122.2(12) . . ?
C10 C11 H11 118.9 . . ?
C12 C11 H11 118.9 . . ?
O2 C12 C7 122.6(11) . . ?
O2 C12 C11 119.6(10) . . ?
C7 C12 C11 117.8(10) . . ?
C12 O2 Ni1 131.8(6) . . ?
C12 O2 Tb1 133.4(6) . . ?
Ni1 O2 Tb1 94.7(2) . . ?
C13 O3 Ni1 103.4(11) . . ?
C13 O3 Tb1 130.6(10) . 18_545 ?
Ni1 O3 Tb1 92.9(3) . 18_545 ?
C13 O3 Tb1 123.8(10) . . ?
Ni1 O3 Tb1 90.2(2) . . ?
Tb1 O3 Tb1 102.1(3) 18_545 . ?
O3 C13 H13A 109.5 . . ?
O3 C13 H13B 109.5 . . ?
H13A C13 H13B 109.5 . . ?
O3 C13 H13C 109.5 . . ?
H13A C13 H13C 109.5 . . ?
H13B C13 H13C 109.5 . . ?
C14 N1 Ni1 135(2) . . ?
N1 C14 C15 170(3) . . ?
C14 C15 H15A 109.5 . . ?
C14 C15 H15B 109.5 . . ?
H15A C15 H15B 109.5 . . ?
C14 C15 H15C 109.5 . . ?
H15A C15 H15C 109.5 . . ?
H15B C15 H15C 109.5 . . ?
C16 N2 C20 120.0 . . ?
C16 N2 Ni1 127.6(4) . . ?
C20 N2 Ni1 112.4(4) . . ?
C17 C16 N2 120.0 . . ?
C17 C16 H16 120.0 . . ?
N2 C16 H16 120.0 . . ?
C18 C17 C16 120.0 . . ?
C18 C17 H17 120.0 . . ?
C16 C17 H17 120.0 . . ?
C17 C18 C19 120.0 . . ?
C17 C18 H18 120.0 . . ?
C19 C18 H18 120.0 . . ?
C24 C19 C20 119.9(8) . . ?
C24 C19 C18 120.1(8) . . ?
C20 C19 C18 120.0 . . ?
C19 C20 N2 120.0 . . ?
C19 C20 C21 124.2(7) . . ?
N2 C20 C21 115.8(8) . . ?
O4 C21 C22 125.9(12) . . ?
O4 C21 C20 120.3(10) . . ?
C22 C21 C20 113.8(12) . . ?
C21 C22 C23 121.9(15) . . ?
C21 C22 Cl2 115.6(11) . . ?
C23 C22 Cl2 122.5(12) . . ?
C24 C23 C22 120.2(14) . . ?
C24 C23 H23 119.9 . . ?
C22 C23 H23 119.9 . . ?
C19 C24 C23 120.0(10) . . ?
C19 C24 Cl1 139.7(12) . . ?
C23 C24 Cl1 100.3(13) . . ?
C19 C24 Cl1' 110.9(12) . . ?
C23 C24 Cl1' 129.1(14) . . ?
C21 O4 Ni1 110.6(7) . . ?
C21 O4 Tb1 132.4(6) . . ?
Ni1 O4 Tb1 87.4(3) . . ?
C21 O4 Tb1 130.3(6) . 18_545 ?
Ni1 O4 Tb1 85.7(2) . 18_545 ?
Tb1 O4 Tb1 93.4(2) . 18_545 ?
Tb2 O5 Tb1 128.1(5) . . ?
Tb2 O5 Tb1 127.6(6) . 17 ?
Tb1 O5 Tb1 103.9(4) . 17 ?
Tb2 O5 Tb2 54.0(3) . 16_655 ?
Tb1 O5 Tb2 109.4(5) . 16_655 ?
Tb1 O5 Tb2 107.3(5) 17 16_655 ?
Tb2 O5 H51 87.5 . . ?
Tb1 O5 H51 96.1 . . ?
Tb1 O5 H51 93.5 17 . ?
Tb2 O5 H51 141.4 16_655 . ?
Tb2 O5' Tb1 106.3(5) . . ?
Tb2 O5' Tb1 105.6(5) . 17 ?
Tb1 O5' Tb1 95.7(5) . 17 ?
Tb2 O5' H52 104.1 . . ?
Tb1 O5' H52 116.6 . . ?
Tb1 O5' H52 126.9 17 . ?
Cl3 Cl3 Cl3 60.000(4) 3_665 2_655 ?
Cl3 Cl3 Tb2 76.8(3) 3_665 . ?
Cl3 Cl3 Tb2 76.8(3) 2_655 . ?
 
loop_
 _geom_torsion_atom_site_label_1
 _geom_torsion_atom_site_label_2
 _geom_torsion_atom_site_label_3
 _geom_torsion_atom_site_label_4
 _geom_torsion
 _geom_torsion_site_symmetry_1
 _geom_torsion_site_symmetry_2
 _geom_torsion_site_symmetry_3
 _geom_torsion_site_symmetry_4
 _geom_torsion_publ_flag
Ni1 O1 C1 C2 -67.6(12) 17 . . . ?
Tb1 O1 C1 C2 105.9(10) . . . . ?
Ni1 O1 C1 C6 113.1(9) 17 . . . ?
Tb1 O1 C1 C6 -73.5(11) . . . . ?
O1 C1 C2 C3 -177.6(10) . . . . ?
C6 C1 C2 C3 1.7(16) . . . . ?
C1 C2 C3 C4 -1.0(18) . . . . ?
C2 C3 C4 C5 -0.7(19) . . . . ?
C3 C4 C5 C6 1.6(19) . . . . ?
O1 C1 C6 C5 178.5(8) . . . . ?
C2 C1 C6 C5 -0.9(13) . . . . ?
O1 C1 C6 C7 -4.2(14) . . . . ?
C2 C1 C6 C7 176.4(9) . . . . ?
C4 C5 C6 C1 -0.8(15) . . . . ?
C4 C5 C6 C7 -178.3(10) . . . . ?
C1 C6 C7 C8 -128.0(11) . . . . ?
C5 C6 C7 C8 49.2(14) . . . . ?
C1 C6 C7 C12 54.2(15) . . . . ?
C5 C6 C7 C12 -128.6(11) . . . . ?
C12 C7 C8 C9 1.3(18) . . . . ?
C6 C7 C8 C9 -176.6(12) . . . . ?
C7 C8 C9 C10 0(2) . . . . ?
C8 C9 C10 C11 0(2) . . . . ?
C9 C10 C11 C12 -1(2) . . . . ?
C8 C7 C12 O2 177.5(10) . . . . ?
C6 C7 C12 O2 -4.7(16) . . . . ?
C8 C7 C12 C11 -2.3(16) . . . . ?
C6 C7 C12 C11 175.5(10) . . . . ?
C10 C11 C12 O2 -177.7(11) . . . . ?
C10 C11 C12 C7 2.1(18) . . . . ?
C7 C12 O2 Ni1 104.9(11) . . . . ?
C11 C12 O2 Ni1 -75.4(13) . . . . ?
C7 C12 O2 Tb1 -71.8(13) . . . . ?
C11 C12 O2 Tb1 107.9(11) . . . . ?
Ni1 N1 C14 C15 -101(20) . . . . ?
C20 N2 C16 C17 0.0 . . . . ?
Ni1 N2 C16 C17 178.2(5) . . . . ?
N2 C16 C17 C18 0.0 . . . . ?
C16 C17 C18 C19 0.0 . . . . ?
C17 C18 C19 C24 179.8(11) . . . . ?
C17 C18 C19 C20 0.0 . . . . ?
C24 C19 C20 N2 -179.8(11) . . . . ?
C18 C19 C20 N2 0.0 . . . . ?
C24 C19 C20 C21 -1.8(12) . . . . ?
C18 C19 C20 C21 178.1(8) . . . . ?
C16 N2 C20 C19 0.0 . . . . ?
Ni1 N2 C20 C19 -178.5(5) . . . . ?
C16 N2 C20 C21 -178.2(7) . . . . ?
Ni1 N2 C20 C21 3.3(7) . . . . ?
C19 C20 C21 O4 -178.7(7) . . . . ?
N2 C20 C21 O4 -0.6(11) . . . . ?
C19 C20 C21 C22 1.2(12) . . . . ?
N2 C20 C21 C22 179.3(8) . . . . ?
O4 C21 C22 C23 179.8(12) . . . . ?
C20 C21 C22 C23 -0.1(18) . . . . ?
O4 C21 C22 Cl2 0.5(17) . . . . ?
C20 C21 C22 Cl2 -179.4(8) . . . . ?
C21 C22 C23 C24 0(2) . . . . ?
Cl2 C22 C23 C24 178.8(13) . . . . ?
C20 C19 C24 C23 1(2) . . . . ?
C18 C19 C24 C23 -178.7(12) . . . . ?
C20 C19 C24 Cl1 -178.7(15) . . . . ?
C18 C19 C24 Cl1 1(2) . . . . ?
C20 C19 C24 Cl1' 179.9(8) . . . . ?
C18 C19 C24 Cl1' 0.1(15) . . . . ?
C22 C23 C24 C19 0(2) . . . . ?
C22 C23 C24 Cl1 179.8(14) . . . . ?
C22 C23 C24 Cl1' -178.6(14) . . . . ?
C22 C21 O4 Ni1 177.8(10) . . . . ?
C20 C21 O4 Ni1 -2.4(11) . . . . ?
C22 C21 O4 Tb1 -76.1(14) . . . . ?
C20 C21 O4 Tb1 103.8(10) . . . . ?
C22 C21 O4 Tb1 75.4(14) . . . 18_545 ?
C20 C21 O4 Tb1 -104.7(10) . . . 18_545 ?
 
loop_
 _geom_hbond_atom_site_label_D 
 _geom_hbond_atom_site_label_H 
 _geom_hbond_atom_site_label_A 
 _geom_hbond_distance_DH 
 _geom_hbond_distance_HA 
 _geom_hbond_distance_DA 
 _geom_hbond_angle_DHA 
 _geom_hbond_site_symmetry_A 
C13 H13B N1  0.98 2.37 2.99(3) 120.4 .
C13 H13C O5'  0.98 2.65 3.22(3) 117.4 2_655
C13 H13C Cl3  0.98 1.71 2.61(3) 151.2 .
C13 H13C Cl3  0.98 2.73 3.70(3) 168.5 2_655
C13 H13C Cl3  0.98 2.88 3.71(3) 143.4 3_665
C13 H13C Cl3'  0.98 2.33 3.23(2) 151.5 .
C15 H15A Cl4  0.98 2.60 3.40(7) 139.0 .
 
_refine_diff_density_max    1.317
_refine_diff_density_min   -1.217
_refine_diff_density_rms    0.158

_shelx_res_file
;

    20191011-CZL-PY-2-2.res created by SHELXL-2014/7


TITL 20191011-CZL-PY-2-2 in R-3 #148
CELL 0.71073 20.56012 20.56012 32.52572 90 90 120
ZERR 3  0.00067 0.00067 0.00276 0 0 0
LATT 3
SYMM -Y,+X-Y,+Z
SYMM +Y-X,-X,+Z
SFAC C  H  N  O  Cl Tb Ni
UNIT 432  342  36  90  45  21  18
omit -3 50.04
L.S. 16
ACTA
BOND $H
FMAP 2
PLAN 21
CONF
HTAB
HTAB C13 N1
EQIV $1 -y+1, x-y, z
HTAB C13 O5'_$1
HTAB C13 Cl3
HTAB C13 Cl3_$1
EQIV $2 -x+y+1, -x+1, z
HTAB C13 Cl3_$2
HTAB C13 Cl3'
HTAB C15 Cl4
SIMU Cl1 Cl2 Cl3 Cl3'
SIMU 0.01 C16 C17 C18 C19 C20 N2 C21 C22 C23 C24
SIMU 0.01 0.02 $O
isor 0.01 $O
isor 0.01 Cl3 Cl3' Cl4 Cl4'
delu 0.02 0.01 Cl3 Cl3' Cl4 Cl4'
SIMU 0.01 0.02 Cl1 Cl2 Cl3 Cl3' Cl4 Cl4'
SIMU 0.01 0.02 2 $C $CL
isor 0.01 O3 C13 C23 C24 O5 C14 N1
delu 0.02 0.01 O3 C13
TEMP -120
size 0.25 0.21 0.18
WGHT    0.059700  397.958649
FVAR       0.76165   0.49877
TB1   6    0.476371    0.309972    0.332014    11.00000    0.02561    0.02844 =
         0.11119   -0.00341   -0.00143    0.01385

TB2   6    0.666667    0.333333    0.302785    10.16667    0.02815    0.02815 =
         0.07851    0.00000    0.00000    0.01408
NI1   7    0.361237    0.150711    0.294215    11.00000    0.03960    0.03547 =
         0.07376   -0.00212   -0.00300    0.01963
O1    4    0.400982    0.345642    0.363390    11.00000    0.03187    0.04580 =
         0.07423   -0.00249    0.00014    0.01849
C1    1    0.329055    0.306957    0.375049    11.00000    0.03680    0.03369 =
         0.08589    0.00290    0.00483    0.02187
C2    1    0.312129    0.292123    0.416432    11.00000    0.04817    0.05182 =
         0.08830    0.00460    0.00608    0.02338
AFIX  43
H2    2    0.351749    0.311246    0.435990    11.00000   -1.20000
AFIX   0
C3    1    0.238436    0.249879    0.429859    11.00000    0.05337    0.06166 =
         0.09857    0.00248    0.01902    0.02238
AFIX  43
H3    2    0.227961    0.239649    0.458324    11.00000   -1.20000
AFIX   0
C4    1    0.181896    0.223461    0.402505    11.00000    0.04289    0.06184 =
         0.11072   -0.00163    0.02116    0.01978
AFIX  43
H4    2    0.131448    0.194064    0.411640    11.00000   -1.20000
AFIX   0
C5    1    0.196748    0.238738    0.361677    11.00000    0.03557    0.05553 =
         0.10664   -0.00268    0.00067    0.02321
AFIX  43
H5    2    0.155699    0.220474    0.343074    11.00000   -1.20000
AFIX   0
C6    1    0.271344    0.281032    0.345548    11.00000    0.03627    0.03592 =
         0.09025   -0.00277   -0.01097    0.02681
C7    1    0.280560    0.295839    0.301251    11.00000    0.04426    0.04967 =
         0.08123   -0.00242   -0.01303    0.03069
C8    1    0.240009    0.324021    0.281607    11.00000    0.06587    0.07433 =
         0.10303   -0.00251   -0.01488    0.04894
AFIX  43
H8    2    0.208764    0.335895    0.297682    11.00000   -1.20000
AFIX   0
C9    1    0.243148    0.335629    0.239387    11.00000    0.08471    0.08405 =
         0.10736    0.00214   -0.01686    0.05749
AFIX  43
H9    2    0.214637    0.355116    0.226956    11.00000   -1.20000
AFIX   0
C10   1    0.286886    0.318962    0.216535    11.00000    0.08546    0.08095 =
         0.09855    0.00248   -0.00993    0.04960
AFIX  43
H10   2    0.289309    0.326321    0.187618    11.00000   -1.20000
AFIX   0
C11   1    0.328193    0.291334    0.234643    11.00000    0.06794    0.06720 =
         0.09289   -0.00200   -0.00320    0.04099
AFIX  43
H11   2    0.358481    0.279317    0.217808    11.00000   -1.20000
AFIX   0
C12   1    0.327288    0.280121    0.277426    11.00000    0.04728    0.04702 =
         0.08724   -0.00212   -0.00595    0.03028
O2    4    0.370946    0.255334    0.293677    11.00000    0.03726    0.04672 =
         0.08051   -0.00508   -0.00531    0.02730
O3    4    0.476601    0.216410    0.287931    11.00000    0.04310    0.04236 =
         0.10010    0.00927    0.01720    0.02821
C13   1    0.487023    0.224705    0.244737    11.00000    0.15127    0.15209 =
         0.17941    0.00388    0.02331    0.07873
AFIX 137
H13A  2    0.474008    0.261818    0.234900    11.00000   -1.50000
H13B  2    0.454624    0.176331    0.231336    11.00000   -1.50000
H13C  2    0.539636    0.241698    0.238135    11.00000   -1.50000
AFIX   0
DFIX 1.15 0.01 N1 C14
DFIX 1.48 0.01 C14 C15
DFIX 2.65 0.01 N1 C15
isor 0.01 C14 C15
delu 0.01 0.02 C14 C15 N1
N1    3    0.322481    0.122937    0.232042    11.00000    0.13381    0.07510 =
         0.10889   -0.00775   -0.00373    0.07551
C14   1    0.270187    0.075814    0.216333    11.00000    0.19990    0.21534 =
         0.20422   -0.03274   -0.01129    0.08289
C15   1    0.210432    0.008572    0.194120    11.00000    0.22379    0.24286 =
         0.22273   -0.05567   -0.02331    0.07685
AFIX 137
H15A  2    0.176717   -0.028644    0.214159    11.00000   -1.50000
H15B  2    0.233819   -0.013471    0.177116    11.00000   -1.50000
H15C  2    0.181669    0.023841    0.176554    11.00000   -1.50000
AFIX  66
N2    3    0.260700    0.096742    0.323644    11.00000    0.04397    0.04289 =
         0.11313   -0.00692   -0.00891    0.02217
C16   1    0.189711    0.056633    0.306106    11.00000    0.04705    0.06638 =
         0.13917   -0.00953   -0.01282    0.01516
AFIX  43
H16   2    0.184376    0.053435    0.277047    11.00000   -1.20000
AFIX  65
C17   1    0.126527    0.021203    0.331087    11.00000    0.04973    0.06923 =
         0.15962   -0.00174   -0.00398    0.01681
AFIX  43
H17   2    0.078009   -0.006210    0.319100    11.00000   -1.20000
AFIX  65
C18   1    0.134331    0.025882    0.373605    11.00000    0.06922    0.06563 =
         0.15319    0.01251    0.01938    0.03208
AFIX  43
H18   2    0.091147    0.001667    0.390678    11.00000   -1.20000
AFIX  65
C19   1    0.205320    0.065990    0.391143    11.00000    0.08544    0.05977 =
         0.11656    0.01138    0.02063    0.04855
C20   1    0.268505    0.101420    0.366163    11.00000    0.06936    0.04460 =
         0.09675   -0.00016    0.00808    0.03909
AFIX   0
C21   1    0.342038    0.144862    0.380906    11.00000    0.09127    0.05309 =
         0.07350   -0.00306    0.00056    0.05112
C22   1    0.347057    0.148649    0.423490    11.00000    0.13358    0.07885 =
         0.09160   -0.00375   -0.00886    0.06493
C23   1    0.283186    0.111744    0.448679    11.00000    0.14072    0.09343 =
         0.09599    0.00254    0.01497    0.06035
AFIX  43
H23   2    0.288506    0.115133    0.477738    11.00000   -1.20000
AFIX   0
DFIX 1.78 0.01 C24 CL1' C24 CL1
DFIX 1.39 0.01 C22 C23 C23 C24
C24   1    0.212833    0.070641    0.431375    11.00000    0.12094    0.08997 =
         0.10923    0.01046    0.03262    0.05956

O4    4    0.398802    0.177766    0.355052    11.00000    0.05142    0.04191 =
         0.06828   -0.00504   -0.00926    0.02425
isor 0.01 Cl1 Cl2
PART 1
CL1   5    0.157838    0.038799    0.475562    21.00000    0.14218    0.16377 =
         0.08865    0.03704    0.02868    0.09162
PART 2
CL1'  5    0.122378    0.019894    0.456443   -21.00000    0.17287    0.09764 =
         0.13490   -0.00972    0.09760    0.02786
PART 0
CL2   5    0.436717    0.202478    0.443233    11.00000    0.23339    0.13413 =
         0.12499   -0.04664   -0.10635    0.09740
PART 1
O5    4    0.604676    0.374170    0.317893    10.50000    0.03531    0.03105 =
         0.05121   -0.00291    0.00315    0.02269
AFIX   3
H51   2    0.599837    0.381496    0.288373    10.50000   -1.50000
AFIX   0
PART 2
O5'   4    0.591055    0.384064    0.290658    10.50000    0.04071    0.04075 =
         0.06059    0.00204    0.00127    0.02091
AFIX   3
H52   2    0.587212    0.382389    0.272238    10.50000   -1.50000
AFIX   0
PART 0
PART 1
CL3   5    0.626704    0.309592    0.222234    10.13334    0.04732    0.02366 =
         0.02662   -0.00728   -0.01119    0.02337
PART 2
CL3'  5    0.666667    0.333333    0.237812    10.03333    0.04245    0.04245 =
         0.01683    0.00000    0.00000    0.02123
PART 0
PART 1
CL4   5    0.035290   -0.097160    0.234545    10.16667    0.24827    0.24634 =
         0.24572    0.00685    0.00005    0.12110
PART 2
CL4'  5    0.001227   -0.127556    0.202031    10.16667    0.24858    0.24587 =
         0.24617    0.00635    0.00475    0.12288
PART 0
HKLF 4

REM  20191011-CZL-PY-2-2 in R-3 #148
REM R1 =  0.0595 for    3601 Fo > 4sig(Fo)  and  0.0796 for all    4671 data
REM    358 parameters refined using    311 restraints

END

WGHT      0.0589    398.3074

REM Instructions for potential hydrogen bonds
HTAB C13 N1
HTAB C13 O5'_$1
HTAB C13 Cl3
HTAB C13 Cl3_$1
HTAB C13 Cl3_$2
HTAB C13 Cl3'
HTAB Cl3 O3
HTAB C15 Cl4

REM Highest difference peak  1.317,  deepest hole -1.217,  1-sigma level  0.158
Q1    1   0.3963  0.1893  0.4459  11.00000  0.05    1.32
Q2    1   0.5136  0.3281  0.3599  11.00000  0.05    1.28
Q3    1   0.6667  0.3333  0.2156  10.33333  0.05    1.26
Q4    1   0.2426  0.0917  0.4425  11.00000  0.05    1.25
Q5    1   0.4669  0.2278  0.4330  11.00000  0.05    1.08
Q6    1   0.3009  0.1025  0.2436  11.00000  0.05    1.01
Q7    1   0.4939  0.2888  0.3026  11.00000  0.05    0.98
Q8    1   0.5185  0.2991  0.3395  11.00000  0.05    0.95
Q9    1   0.6240  0.3461  0.2973  11.00000  0.05    0.91
Q10   1   0.1246  0.0207  0.3489  11.00000  0.05    0.89
Q11   1   0.0969  0.0145  0.4350  11.00000  0.05    0.86
Q12   1   0.4568  0.2742  0.3598  11.00000  0.05    0.85
Q13   1   0.1896  0.0900  0.4862  11.00000  0.05    0.83
Q14   1   0.2150  0.0962  0.1777  11.00000  0.05    0.82
Q15   1   0.3247  0.1421  0.4507  11.00000  0.05    0.81
Q16   1   0.4258  0.3190  0.3277  11.00000  0.05    0.80
Q17   1   0.4277  0.1854  0.4646  11.00000  0.05    0.78
Q18   1   0.4389  0.2952  0.3024  11.00000  0.05    0.77
Q19   1   0.4988  0.3492  0.3039  11.00000  0.05    0.76
Q20   1   0.4209  0.2603  0.3378  11.00000  0.05    0.76
Q21   1   0.4046  0.1590  0.2051  11.00000  0.05    0.76
;
_shelx_res_checksum   64519

_shelx_hkl_file
;
   0   0  -6 270148. 2722.06   1
   0   0   6 265702. 3195.82   3
   0   0   6 278483. 2841.07   1
   0   0  -6 284195. 3383.58   2
   0   0   6 288253. 3186.86   2
   0   0   9 746771. 6502.55   3
   0   0   9 799036. 6582.28   2
   0   0  -9 800864. 7007.21   2
   0   0  -9 745224. 5574.73   1
   0   0   9 795402. 5900.96   1
   0   0  12 33306.9 1593.40   3
   0   0  12 35459.1 1483.61   1
   0   0 -12 36174.1 1750.92   2
   0   0 -12 34110.4 1376.41   1
   0   0  12 36062.3 1615.79   2
   0   0  15 36760.1 1811.40   2
   0   0 -15 37231.1 1643.91   1
   0   0 -18 53250.7 2180.21   1
   0   0 -21 104917. 3363.84   1
   0   0 -24 51233.4 2627.61   1
   0   0 -27 53453.2 2823.18   1
   0   0 -30 10067.0 1463.41   1
   0   0 -33 2290.43 812.419   1
   0   0 -36 5150.40 1268.42   1
   0   0 -39 3890.50 1209.88   1
   0  -1 -41 1130.67 836.712   1
  -1   1 -38 1655.86 810.732   1
   1   0 -38 1417.73 742.554   1
   0  -1 -38 1386.31 865.369   1
   1   0 -35 1215.63 700.373   1
   0  -1 -35 1407.92 727.220   1
  -1   1 -35 1297.09 670.051   1
   0  -1 -32 326.898 453.600   1
  -1   1 -32 318.797 372.412   1
   1   0 -32 440.100 415.272   1
   0  -1 -29 5420.93 1066.88   1
   1   0 -29 4394.23 917.989   1
  -1   1 -29 4168.04 868.459   1
  -1   1 -26 12440.5 1341.12   1
   1   0 -26 11000.1 1245.70   1
   0  -1 -26 15598.9 1593.02   1
   1   0 -23 13807.4 1233.53   1
  -1   1 -23 18614.9 1497.93   1
   0  -1 -23 15726.9 1425.77   1
  -1   0  23 19710.9 1628.53   2
   0  -1 -20 28575.2 1788.03   1
  -1   1 -20 32434.2 1800.26   1
  -1   0  20 32872.5 1999.94   2
   1   0 -20 28721.8 1677.10   1
   1   0 -17 34318.9 1653.42   1
  -1   1 -17 35057.3 1711.01   1
  -1   0  17 40085.6 2007.47   2
   0  -1 -17 34787.4 1760.61   1
  -1   0  14 3163.57 459.300   1
   0  -1 -14 3740.71 542.730   1
  -1   1 -14 3787.01 515.798   1
  -1   0  14 3836.66 580.745   2
   1   0 -14 4213.74 524.264   1
   1  -1  14 4415.18 553.748   1
   1   0 -11 53173.9 1638.61   1
   0  -1 -11 53838.0 1767.44   1
  -1   0  11 55967.9 1983.58   3
   0  -1 -11 57053.9 2160.47   2
  -1   0  11 56442.6 1900.52   2
  -1   1 -11 57170.9 2111.53   2
   1  -1  11 57390.8 1729.23   1
  -1   0  11 59555.9 1734.21   1
  -1   1 -11 52286.7 1637.97   1
   0   1  11 59894.5 1880.22   1
   1  -1  11 59861.6 1931.96   2
  -1   0   8 114767. 2333.96   2
   0   1   8 116737. 2306.17   1
   1   0  -8 118698. 2381.24   3
  -1   0   8 115477. 2067.37   1
   1   0  -8 115314. 1989.61   1
   1  -1   8 116777. 2330.60   2
   0  -1  -8 119764. 2626.32   2
  -1   1  -8 118703. 2584.45   2
  -1   0   8 122473. 2466.74   3
   0  -1  -8 110999. 2199.80   1
   1  -1   8 115562. 2100.08   1
  -1   1  -8 110079. 2029.79   1
   1  -1  -7 233821. 3256.54   2
  -1   0  -7 228583. 3465.36   2
   0  -1   7 225578. 2493.63   1
   0   1  -7 227993. 2424.94   1
  -1   1   7 233888. 2931.41   1
   0  -1   7 225802. 3018.48   2
   0  -1   7 236393. 3145.16   3
   1   0   7 225529. 2984.37   1
  -1   0  -7 216942. 2877.50   1
  -1   1   7 231433. 3135.05   2
   1  -1  -7 221308. 2835.43   1
  -1   1   7 232279. 3311.72   3
  -1   1  10 132779. 2627.43   1
   0  -1  10 129202. 2751.18   2
   1   0  10 131353. 2619.71   1
  -1   0 -10 130539. 3137.60   2
   0  -1  10 125805. 2840.14   3
   0  -1  10 131839. 2352.92   1
   1  -1 -10 129758. 2941.53   2
  -1   0 -10 120870. 2497.89   1
   1  -1 -10 119353. 2455.48   1
   0   1 -10 120076. 2226.09   1
  -1   1  10 128484. 2785.81   2
  -1   1  10 125046. 2881.25   3
   0  -1  13 6838.24 630.542   1
   0  -1  13 6052.92 718.280   3
  -1   0 -13 6184.49 651.521   1
  -1   1  13 6981.28 760.468   2
   0   1 -13 6668.08 614.859   1
   0  -1  13 6521.82 720.049   2
  -1   1  13 7546.52 717.581   1
   1   0  13 8154.85 749.086   1
  -1   0 -16 2453.40 469.004   1
   1  -1 -16 2053.16 431.522   1
  -1   1  16 1842.99 438.975   2
   0  -1  16 2177.08 402.176   1
   0   1 -16 1737.68 356.609   1
   0   1 -19 23722.8 1480.22   1
   1  -1 -19 20561.5 1377.24   1
  -1   0 -19 24174.6 1591.93   1
  -1   0 -22 8942.20 1083.87   1
   0   1 -22 8748.84 992.865   1
   1  -1 -22 6190.20 807.622   1
  -1   0 -25 17804.8 1634.25   1
   1  -1 -25 15420.4 1496.51   1
   0   1 -25 14086.1 1367.76   1
   1  -1 -28 12974.1 1495.55   1
  -1   0 -28 11985.1 1489.19   1
   0   1 -28 11532.9 1362.53   1
  -1   0 -31 1948.35 641.617   1
   0   1 -31 2838.91 758.443   1
   1  -1 -31 2068.39 737.926   1
   0   1 -34 1820.67 752.090   1
  -1   0 -34 1530.74 700.760   1
   1  -1 -34 1401.31 702.112   1
   1  -1 -37 3152.24 1008.14   1
   0   1 -37 2274.51 891.021   1
  -1   0 -37 2728.84 956.397   1
  -1   0 -40 1120.40 780.325   1
   1  -1 -40 706.655 726.945   1
  -1  -1 -42 127.787 492.079   1
   2  -1 -39 43.2146 436.334   1
  -1  -1 -39 83.8526 405.735   1
  -1   2 -36 168.219 359.215   1
  -1  -1 -36 974.034 642.725   1
   2  -1 -36 375.693 473.976   1
  -1   2 -33 514.564 389.159   1
   2  -1 -33 29.6869 437.999   1
  -1  -1 -33 241.500 475.397   1
  -1  -1 -30 1381.01 591.863   1
  -1   2 -30 1198.39 502.345   1
  -1  -1 -27 633.509 484.661   1
  -1   2 -27 4.40192 314.443   1
  -1   2 -24 2279.99 517.922   1
  -1  -1 -24 3089.01 699.134   1
  -2   1  24 947.932 597.301   2
   2  -1 -24-370.549 671.174   1
   2  -1 -21 5819.91 720.723   1
  -1   2 -21 8549.86 930.683   1
  -1  -1 -21 7959.48 998.795   1
  -2   1  21 9333.03 1103.74   2
   1  -2  18-141.092 457.290   2
  -1   2 -18 585.005 222.652   1
  -1  -1 -18 511.683 296.111   1
  -2   1  18 372.346 264.780   2
   1  -2  15 36892.3 1568.41   1
  -1   2 -15 34685.2 1510.37   1
   2  -1 -15 35861.0 1609.13   1
   1  -2  15 36217.4 1773.03   2
  -1  -1 -15 34729.8 1691.70   1
  -2   1  15 38746.8 1858.09   2
  -2   1  12 17003.0 1108.08   2
   1  -2  12 16409.2 927.064   1
  -2   1  12 15696.4 980.117   1
   1  -2  12 16112.1 1078.36   2
   2  -1 -12 16401.2 1098.81   3
  -2   1  12 15255.3 1101.93   3
  -1   2 -12 15585.0 884.947   1
   1  -2  12 15197.1 1056.52   3
  -1  -1 -12 15374.9 1036.60   1
  -1  -1 -12 15280.4 1225.16   2
   2  -1 -12 15724.7 955.772   1
   1   1  12 16249.2 1063.36   1
  -1   2 -12 16792.6 1162.78   2
   2  -1  -9 26877.7 1099.91   1
  -2   1   9 27540.8 1294.32   3
  -1   2  -9 25144.5 931.618   1
  -1   2  -9 28014.4 1281.95   2
  -2   1   9 28156.0 1124.83   1
   1   1   9 28162.0 1234.35   1
   1  -2   9 26528.6 995.345   1
   1  -2   9 26760.5 1184.44   2
  -1  -1  -9 25721.4 1177.57   1
   1  -2   9 26315.6 1186.34   3
   2  -1  -9 28390.2 1273.39   3
  -2   1   9 26242.7 1168.47   2
   1  -2   6 113726. 1972.06   2
   1   1   6 113193. 2111.88   1
   2  -1  -6 111878. 2058.15   3
  -1   2  -6 113159. 2040.89   2
   2  -1  -6 110169. 1855.46   1
  -2   1   6 111513. 2127.54   3
  -2   1   6 110952. 1926.68   1
  -1   2  -6 106357. 1534.56   1
   1  -2   6 109294. 1616.55   1
   1  -2   6 114525. 1968.15   3
  -1  -1  -6 107568. 2057.07   1
   1  -2  -6 6303.92 491.305   1
   1   1  -6 5948.51 337.880   1
  -1   2   6 6045.36 499.092   3
   1  -2  -6 5608.06 489.758   2
  -1   2   6 6016.06 482.883   1
  -1  -1   6 6071.58 473.275   3
   1   1  -6 5955.21 453.611   3
  -2   1  -6 5855.15 478.848   1
  -1  -1   6 5963.31 354.632   1
   2  -1   6 5843.44 479.617   1
   1  -2  -9 6994.68 610.241   1
   1  -2  -9 7215.95 687.578   2
  -2   1  -9 6508.05 650.712   2
  -2   1  -9 6730.93 595.367   1
  -1  -1   9 7446.03 657.675   3
   1   1  -9 7049.97 490.660   1
  -1  -1   9 7039.25 504.959   1
  -1   2   9 6852.26 646.278   3
   1   1  -9 7529.93 627.268   3
  -1   2   9 7332.26 625.443   1
   2  -1   9 6047.15 487.410   1
   1   1 -12 1262.63 258.023   1
   1   1 -12 1094.25 298.919   3
  -1  -1  12 1206.76 291.573   2
  -2   1 -12 1879.48 413.924   2
  -1  -1  12 2223.99 340.782   1
  -1   2  12 1366.01 313.494   1
  -1  -1  12 1423.90 333.917   3
  -2   1 -12 895.524 235.580   1
   1  -2 -12 1163.84 293.982   1
   1  -2 -12 1264.63 340.219   2
  -1   2  12 1218.04 330.452   3
   2  -1  12 1410.92 299.336   1
  -1  -1  15 711.962 290.470   2
   1  -2 -15 192.054 332.607   1
   1   1 -15 748.079 227.800   1
  -1  -1  15 826.976 241.259   1
  -2   1 -15 708.363 250.958   1
  -2   1 -18-77.6579 265.285   1
   1   1 -18 70.8576 176.015   1
   1  -2 -18-224.526 377.080   1
  -1  -1  18-224.849 366.164   2
  -1  -1  21 1475.04 505.779   2
   1  -2 -21 436.553 279.581   1
   1   1 -21 984.820 325.306   1
  -2   1 -21 1187.08 377.547   1
   1  -2 -24-227.065 399.902   1
   1   1 -24-221.663 371.881   1
  -2   1 -24-334.407 435.124   1
   1   1 -27-308.105 398.514   1
   1  -2 -27-69.9111 390.556   1
  -2   1 -27 400.976 417.555   1
   1   1 -30-114.524 399.473   1
   1  -2 -30-424.568 424.543   1
   1   1 -33-608.553 546.752   1
   1  -2 -33-151.398 442.956   1
  -2   1 -33-1327.90 839.802   1
   1  -2 -36 242.091 502.062   1
   1   1 -36 219.626 400.465   1
  -2   1 -36-118.320 399.207   1
   1  -2 -39 183.710 449.925   1
  -2   1 -39-189.579 443.283   1
   1  -2 -42 161.412 595.923   1
   0  -2 -43 217.274 612.862   1
   0  -2 -40-103.126 407.232   1
  -2   2 -37-551.127 594.939   1
   2   0 -37-342.063 439.291   1
   0  -2 -37 213.765 461.228   1
   2   0 -34-177.781 412.702   1
  -2   2 -34 191.711 394.752   1
   0  -2 -34 937.989 577.472   1
   2   0 -31 1636.07 601.458   1
   0  -2 -31 1792.55 704.946   1
  -2   2 -31 651.668 437.512   1
  -2   2 -28 1270.06 496.565   1
   0  -2 -28 2244.10 769.213   1
   2   0 -28 995.164 395.644   1
  -2   2 -25 4382.99 794.425   1
   0  -2 -25 5643.91 997.544   1
  -2   0  25 3480.78 734.300   2
   2   0 -25 2935.49 583.008   1
  -2   0  22 60.3631 317.984   2
   0  -2 -22 90.1523 443.735   1
  -2   2 -22 178.313 281.404   1
  -2   2 -19 4632.07 688.387   1
  -2   0  19 4692.87 729.429   2
   2   0 -19 3488.84 511.040   1
   0  -2 -19 3928.19 655.084   1
  -2   0  16 6603.95 776.782   2
   0  -2 -16 6299.65 752.355   1
  -2   2 -16 5614.62 671.503   1
   2   0 -16 5888.00 652.914   1
   2  -2  13 13025.0 924.006   1
   2   0 -13 13646.7 1012.88   3
   0  -2 -13 12190.9 953.736   1
  -2   0  13 13553.2 1023.06   2
  -2   0  13 13074.6 900.756   1
   2   0 -13 12450.9 851.413   1
  -2   2 -13 11999.1 884.429   1
   0   2  10 10568.0 801.712   1
   2   0 -10 8557.72 605.308   1
  -2   0  10 8933.31 632.617   1
  -2   0  10 7612.57 614.900   2
   0  -2 -10 9414.96 856.127   2
  -2   2 -10 9936.64 845.000   2
   0  -2 -10 9469.82 744.908   1
   2  -2  10 9162.23 677.320   1
  -2   0  10 9465.41 788.473   3
  -2   2 -10 8631.95 656.119   1
   2   0 -10 9037.38 734.370   3
  -2   0   7 219689. 2668.62   1
  -2   2  -7 229019. 3345.76   2
  -2   0   7 221943. 3210.95   3
   2   0  -7 218490. 3060.28   3
  -2   2  -7 206527. 2806.40   1
   0   2   7 231467. 3263.59   1
   2  -2   7 215116. 2894.62   1
   0  -2  -7 215873. 3089.57   1
  -2   0   4 32935.0 1016.03   3
  -2   2   5 38844.1 1084.74   2
   0   2  -5 37416.1 986.125   3
   0  -2   5 37760.0 1041.84   3
   2  -2  -5 36854.0 1100.27   1
   2   0   5 37175.5 1214.73   1
  -2   2   5 39364.0 1169.04   1
  -2   0  -5 34909.0 1189.98   1
   2  -2  -5 37865.2 1128.07   3
  -2   2   5 38419.2 1159.41   3
  -2   0  -8 44414.3 1501.38   1
   0  -2   8 46648.6 1500.05   3
  -2   2   8 48767.9 1613.03   3
   2  -2  -8 49513.5 1599.54   3
   0   2  -8 46703.2 1440.46   3
  -2   2   8 48811.7 1544.45   2
   2   0   8 48754.5 1581.11   1
  -2   2   8 49290.2 1515.68   1
   2  -2  -8 47899.2 1559.13   2
   2  -2  -8 46747.3 1462.87   1
   0  -2   8 45157.4 1446.33   2
   0   2  -8 46316.7 1054.05   1
   0  -2   8 47025.8 1109.14   1
  -2   2  11 9626.49 770.225   1
   0  -2  11 9585.21 786.907   2
   2  -2 -11 9759.75 836.327   2
  -2   0 -11 8887.74 772.047   1
   0   2 -11 9727.21 618.175   1
  -2   2  11 9773.86 822.427   2
   2  -2 -11 9663.75 761.231   1
   0  -2  11 9032.83 788.002   3
  -2   2  11 9555.06 848.094   3
   0  -2  11 10092.8 651.637   1
   0  -2  14 5658.07 688.237   2
   0   2 -14 5326.04 542.037   1
   0  -2  14 6495.09 609.771   1
  -2   2  14 6194.27 734.836   2
  -2   0 -14 5434.83 648.765   1
   2  -2 -14 5866.73 675.367   1
   0  -2  17 31533.8 1765.22   2
   2  -2 -17 28577.4 1598.50   1
  -2   0 -17 30419.7 1692.18   1
   0   2 -17 29474.1 1439.88   1
  -2   2  17 29491.2 1711.15   2
   0  -2  17 30120.3 1492.62   1
  -2   2  20 39876.5 2137.40   2
  -2   0 -20 44620.9 2241.63   1
   0  -2  20 49377.3 2380.27   2
   2  -2 -20 45375.9 2180.00   1
   0   2 -20 43666.2 1962.70   1
   0   2 -23 9189.33 1030.55   1
  -2   0 -23 9133.17 1106.48   1
   0  -2  23 9466.19 1106.37   2
   2  -2 -23 9651.93 1103.24   1
  -2   0 -26 962.273 451.362   1
   0   2 -26 461.976 287.198   1
   2  -2 -26 840.530 386.417   1
   2  -2 -29 67.3674 385.742   1
   0   2 -29 283.244 330.203   1
   0   2 -32 5682.15 1043.53   1
   2  -2 -32 4550.22 1003.73   1
  -2   0 -32 5123.48 1065.02   1
   2  -2 -35 1003.55 644.280   1
   0   2 -35 1602.74 632.799   1
  -2   0 -35 1053.34 634.378   1
   2  -2 -38 175.480 502.760   1
  -2   0 -38-79.8446 448.195   1
  -2   0 -41-573.999 577.580   1
   2  -2 -41-190.296 433.697   1
  -2  -1 -43-7.81735 419.639   1
   3  -2 -40 154.877 438.505   1
  -2  -1 -40 107.532 472.734   1
   3  -2 -37-311.690 457.878   1
  -2  -1 -37 296.024 508.937   1
   3  -2 -34 582.987 430.763   1
  -1   3 -34 740.252 467.110   1
  -2  -1 -34 1228.62 630.047   1
  -1   3 -31 704.553 454.961   1
   3  -2 -31 655.010 487.959   1
  -2  -1 -31 1109.72 643.625   1
   3  -2 -28 762.650 471.738   1
  -2  -1 -28 2122.13 756.403   1
  -1   3 -28 1360.04 522.600   1
  -1   3 -25 6036.40 877.607   1
  -3   2  25 7658.56 1113.28   2
  -2  -1 -25 9903.60 1255.82   1
   3  -2 -25 6567.95 977.653   1
  -1   3 -22 37457.7 1978.14   1
   1  -3  22 43986.2 2369.29   2
  -3   2  22 45253.9 2455.86   2
  -2  -1 -22 46384.8 2478.93   1
   3  -2 -22 39690.2 2162.63   1
   3  -2 -19 105178. 3195.41   1
   1  -3  19 116261. 3537.44   2
  -2  -1 -19 109388. 3501.43   1
  -3   2  19 110478. 3551.51   2
  -1   3 -19 101898. 2870.24   1
   1  -3  16 100133. 3023.02   2
  -1   3 -16 87822.3 2384.35   1
  -2  -1 -16 91145.9 2957.40   1
  -3   2  16 102057. 3103.32   2
   3  -2 -16 94470.8 2786.89   1
   1  -3  16 98433.6 2602.20   1
   3  -2 -13 69600.9 2161.17   1
  -2  -1 -13 66624.5 2315.91   1
   1  -3  13 66381.7 2305.96   3
  -1   3 -13 65889.3 1798.78   1
  -3   2  13 74690.3 2411.41   2
  -3   2  13 70720.8 2241.08   1
   1  -3  13 69283.6 1901.34   1
   1  -3  13 68188.0 2276.51   2
   3  -2 -13 68769.3 2379.48   3
  -2  -1 -10 38186.2 1586.49   1
  -1   3 -10 37400.7 1131.24   1
  -3   2  10 40772.4 1570.07   2
   1  -3  10 36872.7 1181.80   1
  -3   2  10 39913.2 1498.61   1
   3  -2 -10 37130.7 1421.85   1
   3  -2 -10 37241.7 1547.32   3
   1  -3  10 39380.0 1498.36   2
  -3   2  10 39161.3 1642.39   3
   2   1  10 41612.3 1655.90   1
   1  -3  10 38179.8 1494.38   3
   1  -3   7 2300.60 300.812   2
  -1   3  -7 2040.94 208.456   1
   1  -3   7 2225.77 303.502   3
   3  -2  -7 2133.33 328.307   3
   2   1   7 2440.96 356.772   1
   1  -3   7 2098.19 228.946   1
  -3   2   7 2308.72 317.643   1
  -3   2   7 2086.34 324.025   3
  -2  -1  -7 1993.43 335.572   1
  -1   3  -4 328.581 79.8715   3
  -2  -1  -4 319.203 121.501   1
   3  -2  -4 285.488 109.957   3
   2   1   4 189.177 103.020   1
  -3   2   4 173.538 90.4281   3
   1  -3   4 202.017 68.1486   3
  -1   3   5 216987. 2929.26   1
   3  -2   5 204550. 3049.70   1
   2   1  -5 217012. 2840.67   3
   1  -3  -5 229618. 2986.77   1
  -2  -1   5 216553. 2840.44   3
  -3   2  -5 203854. 3134.66   1
  -3   2  -8 165838. 3058.59   1
  -2  -1   8 185880. 3137.52   3
   2   1  -8 176721. 2928.20   3
  -2  -1   8 176857. 2334.17   1
   1  -3  -8 178360. 3068.16   1
  -1   3   8 189744. 3206.89   1
   1  -3  -8 185794. 3361.36   2
   3  -2   8 185731. 3158.50   1
  -3   2 -11 9351.21 780.300   1
  -2  -1  11 10230.3 679.822   1
   2   1 -11 9737.36 635.671   1
  -1   3  11 10851.5 866.189   1
  -1   3  11 9549.86 846.115   3
   1  -3 -11 10295.2 828.272   1
   3  -2  11 10685.4 836.165   1
   2   1 -11 10124.7 797.415   3
   1  -3 -11 11003.4 958.564   2
  -3   2 -11 11536.6 1017.39   2
  -2  -1  11 11183.1 890.634   3
   2   1 -14 13031.9 1043.79   3
  -2  -1  14 13987.5 916.025   1
  -2  -1  14 13994.5 1104.69   2
   1  -3 -14 12919.4 1026.54   1
   2   1 -14 12986.4 855.465   1
   3  -2  14 13333.0 1028.46   1
  -3   2 -14 13153.5 1027.19   1
   2   1 -17 4245.14 657.077   3
  -3   2 -17 4652.67 678.326   1
   1  -3 -17 3812.08 564.261   1
   2   1 -17 4399.39 564.332   1
  -2  -1  17 4665.51 741.763   2
  -2  -1  17 4854.13 600.135   1
   2   1 -20 148.226 181.544   1
  -2  -1  20 452.517 284.305   2
  -3   2 -20 565.254 320.252   1
  -2  -1  23 4184.51 843.394   2
  -3   2 -23 3121.73 710.937   1
   2   1 -23 2627.71 567.962   1
   1  -3 -23 2914.25 662.864   1
  -2  -1  26 2150.92 770.598   2
  -3   2 -26 1235.58 572.097   1
   2   1 -26 1745.66 576.344   1
   1  -3 -26 2087.34 721.305   1
  -2  -1  29 187.999 385.822   2
  -3   2 -29 213.882 344.855   1
   2   1 -29 708.762 402.327   1
   1  -3 -29 261.646 403.988   1
   1  -3 -32-431.380 541.784   1
   2   1 -32 215.406 318.217   1
  -3   2 -32 413.272 431.961   1
   1  -3 -35-448.518 491.953   1
  -3   2 -35-808.941 684.546   1
   2   1 -35-379.293 453.842   1
   1  -3 -38-654.540 565.318   1
  -3   2 -38-2036.20 816.989   1
   1  -3 -41-893.862 644.732   1
  -1  -2 -41-221.258 482.886   1
   3  -1 -38 484.899 478.837   1
  -1  -2 -38 167.487 434.724   1
  -1  -2 -35 524.737 569.230   1
  -2   3 -35 398.267 485.529   1
   3  -1 -35 278.726 412.870   1
  -1  -2 -32 1718.86 785.702   1
   3  -1 -32 1677.63 734.771   1
  -2   3 -32 1781.28 706.072   1
   3  -1 -29 822.975 483.858   1
  -1  -2 -29 1574.70 702.268   1
  -2   3 -29 1991.37 648.037   1
   3  -1 -26 3148.99 724.468   1
  -2   3 -26 2020.30 557.765   1
  -3   1  26 4085.78 906.399   2
  -2   3 -23 13080.3 1263.26   1
   3  -1 -23 12987.5 1220.43   1
  -3   1  23 14961.9 1496.22   2
   3  -1 -20 16281.2 1264.06   1
  -1  -2 -20 17846.5 1499.65   1
  -2   3 -20 15166.5 1208.60   1
  -3   1  20 15840.7 1408.92   2
  -3   1  17 63847.6 2561.18   2
   3  -1 -17 60969.5 2517.90   3
  -2   3 -17 56944.2 2146.40   1
  -1  -2 -17 58610.6 2480.00   1
   3  -1 -17 59949.1 2232.43   1
   2  -3  17 63534.1 2263.00   1
   2  -3  14 112532. 2963.00   2
  -2   3 -14 105405. 2576.46   1
   3  -1 -14 113057. 2721.10   1
   3  -1 -14 111777. 3097.55   3
   2  -3  14 114962. 2738.94   1
  -3   1  14 117818. 3153.12   2
  -1  -2 -14 106122. 3027.61   1
  -3   1  14 113356. 2839.37   1
   3  -1 -11 101916. 2630.09   3
  -2   3 -11 99247.6 2178.56   1
  -3   1  11 103845. 2767.00   3
   3  -1 -11 101535. 2302.72   1
   2  -3  11 105046. 2548.56   2
  -3   1  11 106027. 2424.75   1
   2  -3  11 102050. 2267.78   1
  -3   1  11 101151. 2627.44   2
  -2   3 -11 105167. 2787.27   2
   1   2  11 109549. 2760.42   1
  -1  -2 -11 98227.9 2582.16   1
   1   2   8 37250.4 1442.98   1
  -3   1   8 33946.1 1202.26   1
  -3   1   8 34591.5 1388.16   3
  -2   3  -8 35150.9 1355.09   2
   2  -3   8 34229.6 1167.76   1
  -1  -2  -8 33326.3 1361.96   1
  -2   3  -8 33383.7 1105.49   1
   3  -1  -8 36315.8 1386.95   3
   2  -3   8 36578.1 1296.36   2
  -3   1   5 172082. 2638.26   3
  -2   3  -5 181113. 2353.80   2
   1   2   5 176732. 2696.58   1
   2  -3   5 178579. 2303.18   1
   2  -3   5 183257. 2257.94   2
  -1  -2  -5 174756. 2674.37   1
   3  -1  -5 178900. 2643.75   3
   2  -3  -4 43718.0 1144.71   3
   1   2  -4 40307.3 1056.48   3
  -1  -2   4 38305.8 1061.94   3
  -3   1  -4 36944.6 1335.46   1
  -2   3   4 39834.8 1186.29   1
   2  -3  -4 41787.4 1196.55   1
   2  -3  -4 40711.4 1054.58   2
  -2   3   4 40811.0 1109.48   3
  -2   3   4 42403.6 1053.63   2
   3  -1   4 37124.8 1294.91   1
   3  -1   7 5748.08 566.569   1
   2  -3  -7 5248.88 504.338   1
  -2   3   7 5454.25 517.290   3
   2  -3  -7 5614.79 521.816   2
  -1  -2   7 5274.80 486.543   3
   1   2  -7 5713.60 470.908   3
  -2   3   7 5973.60 543.490   1
  -1  -2   7 5401.22 323.827   1
  -2   3   7 5187.50 476.195   2
   3  -1  10 105485. 2605.76   1
  -2   3  10 108285. 2583.73   1
  -2   3  10 101558. 2662.31   3
  -1  -2  10 104303. 1876.51   1
   2  -3 -10 100648. 2488.50   1
   2  -3 -10 106209. 2700.51   2
   1   2 -10 99900.8 1768.88   1
  -3   1 -10 97342.9 2507.39   1
  -1  -2  10 104672. 2559.68   3
   1   2 -10 106250. 2397.14   3
  -2   3  10 109802. 2581.75   2
   3  -1  13 76829.6 2444.37   1
   1   2 -13 68405.5 2242.80   3
  -3   1 -13 68235.2 2327.56   1
  -2   3  13 73999.1 2395.42   2
   1   2 -13 67618.6 1768.64   1
  -1  -2  13 72033.4 1874.78   1
  -1  -2  13 70424.7 2354.56   2
   2  -3 -13 67277.5 2254.39   1
   1   2 -16 27001.5 1283.33   1
  -1  -2  16 30064.5 1404.34   1
   2  -3 -16 28627.8 1605.50   1
  -3   1 -16 29725.3 1658.64   1
  -1  -2  16 29892.0 1710.04   2
  -1  -2  19 28732.8 1847.23   2
   1   2 -19 28155.7 1518.77   1
   2  -3 -19 30977.8 1809.73   1
  -3   1 -19 30429.8 1828.28   1
  -3   1 -22 7019.97 970.749   1
  -1  -2  22 7914.52 1067.95   2
   1   2 -22 6247.99 804.452   1
   2  -3 -22 7980.06 1011.67   1
   2  -3 -25 801.488 429.291   1
  -3   1 -25 464.635 351.916   1
   1   2 -25 206.970 274.360   1
  -1  -2  25 368.441 318.114   2
   2  -3 -28 35.2670 367.144   1
  -1  -2  28 414.927 380.063   2
   1   2 -28-151.045 345.174   1
  -3   1 -28-108.629 346.199   1
   2  -3 -31-274.020 519.793   1
  -3   1 -31-81.3080 449.786   1
   1   2 -31-211.383 369.853   1
   2  -3 -34 736.550 504.983   1
   1   2 -34 227.211 313.089   1
  -3   1 -37-2029.99 824.712   1
   2  -3 -37 74.8696 366.053   1
  -3   1 -40-975.733 665.488   1
   2  -3 -40-694.719 572.946   1
   2  -3 -43-433.691 540.796   1
   0  -3 -42-659.552 617.063   1
   0  -3 -39-1243.25 733.082   1
  -3   3 -36-499.017 499.705   1
   0  -3 -36-2.44097 420.282   1
   0  -3 -33 933.311 648.887   1
  -3   3 -33-87.9941 427.363   1
   3   0 -33 554.452 456.713   1
  -3   3 -30 213.815 376.139   1
   3   0 -30 850.285 491.183   1
   0  -3 -30 855.554 544.719   1
  -3   0  30 613.008 500.680   2
  -3   3 -27 1491.96 594.176   1
  -3   0  27 2978.46 850.837   2
   3   0 -27 3139.95 753.014   1
  -3   0  24 6220.33 1015.69   2
   3   0 -24 6677.57 1014.55   1
  -3   3 -24 4968.97 900.291   1
   0  -3 -24 8411.64 1191.82   1
  -3   3 -21 1400.67 427.401   1
  -3   0  21 1179.86 441.436   2
   0  -3 -21 697.232 434.393   1
   3   0 -21 1818.44 466.202   1
   3   0 -18 4219.94 610.007   1
   3   0 -18 3471.81 639.371   3
  -3   3 -18 3663.32 625.914   1
   0  -3 -18 3591.88 647.654   1
  -3   0  18 3632.19 683.129   2
   0  -3 -15 21413.6 1396.38   1
   3  -3  15 24042.1 1389.13   1
   3   0 -15 22984.6 1220.30   1
  -3   0  15 23621.8 1497.51   2
  -3   3 -15 21422.6 1290.94   1
   3   0 -15 23810.7 1473.82   3
  -3   0  15 23718.8 1283.79   1
   3  -3  12 2771.66 430.588   1
  -3   3 -12 2462.21 399.937   1
   0  -3 -12 2880.31 457.904   1
  -3   0  12 3032.53 397.344   1
   3   0 -12 2676.00 465.931   3
  -3   3 -12 3382.36 550.316   2
   0  -3  -9 74894.4 2122.45   1
  -3   0   9 78229.0 2210.39   3
   0   3   9 81595.4 2250.91   1
  -3   0   9 72913.9 1758.66   1
  -3   3  -9 77336.3 2248.17   2
  -3   3  -9 71007.2 1952.57   1
   3   0  -9 75735.1 2088.06   3
   3  -3   9 74850.7 2049.24   1
   3  -3   6 177340. 2799.54   1
   0   3   6 179991. 2917.83   1
  -3   3  -6 181044. 2834.53   2
  -3   0   6 178163. 2883.91   3
   3   0  -6 181778. 2887.51   3
   0  -3  -6 186284. 2919.20   1
  -3   3  -3 54090.5 1390.06   1
   0  -3  -3 54199.1 1314.77   1
   3   0  -3 54897.8 1455.67   3
  -3   0   3 52504.0 1397.04   3
   0   3   3 53336.7 1333.37   1
   3  -3   0 28472.8 746.779   3
   3   0   0 29063.4 1054.96   1
  -3   3   0 28573.8 770.298   3
  -3   0   0 29365.8 1077.08   1
   0  -3   0 28620.5 717.737   1
   3  -3  -3 2011.06 237.505   3
  -3   3   3 1722.70 222.939   3
   0   3  -3 2082.76 195.749   3
   3   0   3 2877.27 388.076   1
   0  -3   3 1967.21 202.008   3
  -3   0  -3 1797.72 292.724   1
  -3   3   6 19898.3 869.325   2
  -3   3   6 19381.3 923.909   3
   3   0   6 21158.2 1073.65   1
  -3   3   6 19146.5 931.657   1
  -3   0  -6 18753.8 1017.66   1
   0  -3   6 19083.0 811.857   3
   0   3  -6 18782.7 756.587   3
   3  -3  -6 20079.3 919.206   3
   3   0   9 21028.4 1157.51   1
  -3   3   9 21111.1 1081.31   2
   3  -3  -9 20008.2 1102.60   3
   0  -3   9 19323.6 1009.02   3
  -3   3   9 20567.6 1128.20   3
   0   3  -9 17803.1 943.621   3
  -3   0  -9 17464.0 1080.32   1
   0  -3   9 18440.0 680.018   1
   0   3  -9 18399.1 641.448   1
   3  -3  -9 18838.2 1026.34   1
  -3   3   9 19010.2 1048.44   1
  -3   0 -12 104271. 2868.15   1
   0  -3  12 103691. 2051.83   1
   0   3 -12 105023. 1958.93   1
   0  -3  12 109234. 2843.69   3
  -3   3  12 107393. 2805.72   2
   0  -3  12 107477. 2750.45   2
   3  -3 -12 106002. 2702.20   1
   0  -3  15 108669. 3075.95   2
   0  -3  15 100008. 2363.39   1
   3  -3 -15 103571. 2929.22   1
  -3   3  15 106541. 3102.35   2
  -3   0 -15 103915. 3105.94   1
   0   3 -18 83539.6 2389.76   1
   3  -3 -18 89912.7 2993.80   1
  -3   3  18 90104.8 3142.15   2
  -3   0 -18 92228.0 3170.08   1
   0  -3  18 95530.8 3178.54   2
   0  -3  18 88760.9 2550.29   1
   0  -3  21 48884.9 2453.77   2
  -3   3  21 49567.2 2494.78   2
  -3   0 -21 48359.4 2475.86   1
   0   3 -21 40068.2 1879.47   1
   3  -3 -21 47403.0 2345.52   1
   0  -3  24 1244.45 390.395   2
   0   3 -24 1676.11 425.050   1
   3  -3 -24 2413.18 619.860   1
  -3   0 -24 852.549 422.219   1
  -3   0 -27 729.042 464.327   1
   3  -3 -27 827.278 446.201   1
   0  -3  27 687.193 486.015   2
   0   3 -27 640.352 364.530   1
  -3   0 -30-40.7852 385.942   1
   0   3 -30 420.134 355.582   1
   3  -3 -30 214.169 361.817   1
   0   3 -33 887.249 395.557   1
  -3   0 -33 1408.11 608.296   1
   3  -3 -33 976.624 557.899   1
   3  -3 -36 569.205 512.705   1
  -3   0 -36-650.549 564.738   1
  -3   0 -39-112.559 475.745   1
   3  -3 -39 158.088 414.460   1
  -3   0 -42-502.042 574.031   1
  -3  -1 -41-366.935 583.125   1
  -3  -1 -38 181.877 504.966   1
  -3  -1 -35-343.669 532.750   1
   4  -3 -35-1011.01 574.496   1
  -1   4 -32-5.16196 333.127   1
  -3  -1 -32-811.702 581.621   1
   4  -3 -32 52.7702 367.845   1
  -1   4 -29 213.098 287.544   1
   4  -3 -29 166.894 332.258   1
  -3  -1 -29-71.1236 397.726   1
  -4   3  26-707.151 517.273   2
   4  -3 -26-396.257 463.549   1
  -3  -1 -26-126.046 336.664   1
  -1   4 -26-140.640 298.417   1
   1  -4  26 315.739 337.836   2
   4  -3 -23 724.762 363.754   1
   1  -4  23 1062.50 455.706   2
  -1   4 -23 745.422 287.436   1
  -3  -1 -23 690.821 414.595   1
  -4   3  23 389.436 363.316   2
  -1   4 -20 8452.15 847.853   1
  -3  -1 -20 8586.01 1055.40   1
  -4   3  20 9951.84 1173.75   2
   1  -4  20 8538.15 1029.15   2
   4  -3 -20 9157.46 1055.24   1
  -3  -1 -17 1328.19 416.178   1
   1  -4  17 1595.52 339.679   1
  -4   3  17 812.350 343.743   2
  -1   4 -17 1609.11 314.803   1
   4  -3 -17 1756.17 479.479   1
   1  -4  17 773.621 281.868   2
   4  -3 -14 9641.57 877.309   1
  -3  -1 -14 8964.52 937.333   1
   1  -4  14 7452.78 749.974   2
  -1   4 -14 9645.63 674.057   1
   1  -4  14 9668.08 708.403   1
   4  -3 -14 9300.01 954.950   3
  -4   3  14 9101.22 879.111   2
  -4   3  11 105546. 2680.41   2
  -3  -1 -11 101325. 2845.36   1
   1  -4  11 106454. 2600.14   3
   1  -4  11 99026.2 1893.88   1
  -1   4 -11 100712. 1783.22   1
   1  -4  11 103753. 2551.60   2
  -4   3  11 105979. 2677.49   1
   4  -3 -11 101192. 2709.86   3
  -4   3   8 14343.5 920.820   3
  -1   4  -8 14568.9 523.826   1
   3   1   8 15334.3 1005.78   1
  -3  -1  -8 13221.4 951.394   1
   4  -3  -8 13923.8 904.456   3
  -4   3   8 14102.3 887.869   1
   1  -4   8 13108.2 568.608   1
   1  -4   8 14557.0 809.902   3
  -4   3   5 4261.08 431.664   3
  -1   4  -5 4486.06 321.420   3
   4  -3  -5 4560.08 444.536   3
   3   1   5 4747.67 510.792   1
  -3  -1  -5 4392.17 507.627   1
   1  -4   5 4732.20 344.206   3
  -4   3   2 78073.9 1603.47   3
  -1   4  -2 78750.7 1082.00   1
   3   1   2 78208.2 1942.68   1
  -3  -1  -2 76387.4 1928.83   1
   4  -3  -2 80475.6 1659.86   3
   3   1  -1 371.261 132.236   1
  -3  -1   1 67.1167 50.5219   3
  -3  -1   1 277.842 126.085   1
   1  -4  -1 257.281 103.900   1
  -1   4   1 253.158 88.5362   1
   3   1  -1 294.075 133.968   3
   1  -4  -4 26883.4 1044.49   1
  -1   4   4 22538.1 967.950   1
   3   1  -4 24060.2 1046.70   3
  -3  -1   4 22056.5 987.676   3
  -4   3  -4 22612.3 1100.54   1
   3   1  -7 4828.49 511.725   3
  -1   4   7 5159.84 542.209   1
  -4   3  -7 4952.15 576.127   1
  -3  -1   7 4549.33 496.988   3
   4  -3   7 5059.34 536.243   1
   1  -4  -7 5686.76 569.703   1
   1  -4 -10 417.153 184.943   2
  -4   3 -10 606.221 252.859   1
   4  -3  10 281.381 177.293   1
  -3  -1  10 268.845 126.662   1
  -1   4  10 219.609 147.973   1
   1  -4 -10 697.607 291.272   1
   3   1 -10 414.206 239.210   3
  -3  -1  10 363.322 190.512   3
  -4   3 -10 212.879 146.337   2
  -4   3 -13 2881.80 496.428   1
   4  -3  13 3308.39 530.370   1
  -3  -1  13 2703.56 319.484   1
   1  -4 -13 3337.27 544.419   1
   1  -4 -16 19212.3 1371.25   1
   3   1 -16 20891.6 1410.92   3
  -3  -1  16 21096.2 1462.71   2
  -3  -1  16 19709.1 1177.42   1
  -4   3 -16 18696.3 1346.12   1
  -4   3 -19 17190.0 1380.94   1
   3   1 -19 16716.0 1146.50   1
   1  -4 -19 16927.3 1396.60   1
  -3  -1  19 17549.4 1462.81   2
   3   1 -19 17025.0 1388.92   3
   1  -4 -22-97.0709 454.651   1
   3   1 -22-288.376 358.505   1
  -3  -1  22 113.141 323.715   2
  -4   3 -22 427.942 287.723   1
  -4   3 -25 455.237 437.637   1
   3   1 -25 1531.41 525.689   1
   1  -4 -25 1292.50 593.009   1
  -3  -1  25 752.051 463.263   2
   3   1 -28 331.879 272.305   1
  -4   3 -28-411.328 504.824   1
   1  -4 -28 175.684 360.178   1
  -4   3 -31 813.381 481.858   1
  -3  -1  31 1961.07 778.942   2
   1  -4 -31 1114.13 593.240   1
   3   1 -31 2434.57 672.990   1
   1  -4 -34 213.225 469.787   1
  -4   3 -34 664.044 562.400   1
  -4   3 -37-156.035 638.520   1
   1  -4 -37 125.027 441.588   1
   1  -4 -40-313.167 592.203   1
   1  -4 -43-701.702 639.382   1
  -2  -2 -42 8.53625 500.849   1
  -2  -2 -39 320.566 558.070   1
  -2  -2 -36 741.691 645.431   1
   4  -2 -33 318.082 423.787   1
  -2   4 -33 1122.63 583.557   1
  -2  -2 -33 1178.83 706.054   1
  -2  -2 -30 2616.47 876.448   1
  -2   4 -30 2174.54 713.469   1
   4  -2 -30 669.157 479.189   1
   4  -2 -27 125.270 369.957   1
  -2   4 -27 1335.57 510.441   1
  -2  -2 -27 2138.85 727.684   1
  -4   2  27 927.372 552.862   2
  -4   2  24 2346.22 771.142   2
  -2  -2 -24 3516.32 809.654   1
  -2   4 -24 1301.52 486.881   1
   4  -2 -24 115.424 386.541   1
   4  -2 -21 12876.3 1196.31   1
  -2  -2 -21 17041.4 1522.00   1
  -4   2  21 17310.2 1583.81   2
  -2   4 -21 13206.5 1121.10   1
   4  -2 -18 53135.2 2474.23   3
   2  -4  18 52878.6 2053.28   1
   2  -4  18 56676.2 2356.11   2
  -4   2  18 50628.5 2371.00   2
  -2  -2 -18 53622.0 2487.00   1
   4  -2 -18 48813.4 2094.02   1
  -2   4 -18 49118.5 1936.20   1
   4  -2 -15 281552. 5190.71   3
   2  -4  15 286480. 4270.57   1
   4  -2 -15 286216. 4645.61   1
  -2   4 -15 276737. 4146.46   1
   2  -4  15 291823. 4988.73   2
  -2  -2 -15 295855. 5306.51   1
  -4   2  15 289272. 5184.95   2
  -2  -2 -12 270264. 4658.93   1
   2  -4  12 268151. 3728.05   1
   4  -2 -12 266007. 4544.81   3
   2  -4  12 255737. 4257.65   3
   2  -4  12 262691. 4263.76   2
  -2   4 -12 258498. 3471.56   1
  -4   2  12 274178. 4301.44   1
  -4   2  12 279517. 4528.19   2
   4  -2  -9 154536. 3122.57   3
   2  -4   9 148925. 2453.76   1
   2  -4   9 170301. 2912.49   2
  -2  -2  -9 155714. 3252.56   1
  -4   2   9 166493. 3296.93   3
  -4   2   9 164026. 2978.94   1
   2   2   9 176193. 3427.08   1
   2  -4   9 166513. 2865.12   3
  -2   4  -9 158586. 2346.02   1
   2  -4   6 99944.7 1810.09   2
   2  -4   6 98631.1 1748.41   3
  -2  -2  -6 96777.8 2274.25   1
   4  -2  -6 101125. 2249.83   3
  -4   2   6 100127. 2199.26   3
   2   2   6 101634. 2341.44   1
  -2  -2  -3 12631.5 717.161   1
  -4   2   3 12928.3 704.151   3
   2   2   3 12935.6 737.752   1
   4  -2  -3 13129.5 733.146   3
   4  -2   0 2972.03 365.180   3
  -4   2   0 2901.22 347.870   3
   2   2   0 3097.60 325.874   1
  -2  -2   0 3073.59 306.580   1
   4  -2   3 3060.39 399.364   1
  -2   4   3 2779.16 324.391   1
   2  -4  -3 3083.53 337.483   1
  -2  -2   3 3144.37 342.141   3
  -2  -2   3 2952.86 270.847   1
  -2   4   3 2837.53 275.252   3
   2   2  -3 2803.32 331.159   3
  -4   2  -3 2679.71 379.936   1
   2  -4  -6 153950. 2675.30   2
   4  -2   6 147279. 2949.29   1
   2  -4  -6 160589. 2819.51   1
   2   2  -6 156062. 2576.29   3
  -2   4   6 149679. 2732.54   1
  -4   2  -6 144032. 3069.06   1
  -2  -2   6 152560. 2602.85   3
  -2   4   6 155323. 2646.51   3
   2  -4  -9 57103.3 1889.24   1
   2   2  -9 57179.9 1748.29   3
   4  -2   9 59527.8 2043.95   1
   2  -4  -9 58722.1 1957.16   2
  -2   4   9 55943.2 1888.06   3
  -2  -2   9 57144.7 1285.51   1
  -4   2  -9 52924.5 1961.35   1
  -2  -2   9 58209.4 1887.83   3
  -2   4   9 59437.2 1936.86   1
  -2  -2  12 213388. 3049.41   1
   2  -4 -12 211655. 3996.29   1
   2   2 -12 210747. 3766.01   3
   2  -4 -12 212192. 4325.98   2
  -4   2 -12 203435. 4052.78   1
  -2  -2  12 215590. 4128.73   3
   2   2 -15 154595. 2881.82   1
  -4   2 -15 153533. 3883.07   1
   2   2 -15 156278. 3675.89   3
  -2  -2  15 166897. 3110.64   1
   2  -4 -15 158631. 3838.56   1
  -4   2 -18 25800.5 1677.45   1
   2   2 -18 23426.6 1266.88   1
  -2  -2  18 26343.2 1392.96   1
   2  -4 -18 25095.5 1627.79   1
   2   2 -18 23861.6 1574.68   3
  -2  -2  18 25654.5 1698.37   2
   2  -4 -21 12058.3 1243.53   1
  -2  -2  21 11400.9 1265.42   2
   2   2 -21 9121.79 866.474   1
  -4   2 -21 11268.6 1198.82   1
   2  -4 -24 1774.35 610.211   1
  -4   2 -24 2221.53 626.285   1
   2   2 -24 2369.77 541.597   1
  -2  -2  24 2521.54 631.876   2
   2  -4 -27 2033.28 651.236   1
   2   2 -27 2242.86 540.963   1
  -4   2 -27 1766.15 577.453   1
  -2  -2  27 1548.06 587.431   2
  -2  -2  30-646.452 492.854   2
  -4   2 -30 78.8185 345.230   1
   2  -4 -30 43.1902 393.329   1
   2   2 -30-85.2720 362.698   1
  -4   2 -33-473.336 474.601   1
   2  -4 -33-609.774 595.035   1
   2   2 -33-48.7773 366.432   1
  -4   2 -36-2064.84 813.735   1
   2  -4 -36-629.044 543.054   1
  -4   2 -39-1373.79 740.806   1
   2  -4 -39-1202.29 691.971   1
   2  -4 -42-615.963 598.152   1
  -1  -3 -43-0.41545 545.235   1
  -1  -3 -40-198.652 519.854   1
  -1  -3 -37-203.774 467.753   1
  -3   4 -34 493.960 538.668   1
  -1  -3 -34 266.304 511.161   1
  -3   4 -31 1219.05 579.273   1
  -4   1  31 731.190 586.563   2
  -1  -3 -31 819.218 642.940   1
  -3   4 -28-953.297 534.832   1
   4  -1 -28-473.832 483.663   1
  -1  -3 -28 471.763 517.020   1
  -4   1  28-838.233 624.424   2
  -4   1  25 689.318 603.637   2
  -3   4 -25 716.432 495.332   1
  -1  -3 -25 1797.23 719.045   1
   4  -1 -25-20.9968 346.413   1
   4  -1 -22 9727.45 1042.40   1
  -3   4 -22 7173.02 901.155   1
  -1  -3 -22 9835.80 1196.47   1
  -4   1  22 9747.47 1210.26   2
   4  -1 -19 56285.5 2224.04   1
   4  -1 -19 56659.2 2572.35   3
  -1  -3 -19 53509.5 2560.29   1
  -3   4 -19 49963.1 2168.08   1
  -4   1  19 51818.9 2478.18   2
  -4   1  16 153690. 3892.90   2
   3  -4  16 152732. 3485.79   1
  -1  -3 -16 151944. 3919.03   1
  -3   4 -16 143043. 3319.19   1
   4  -1 -16 150303. 3878.49   3
   4  -1 -13 293692. 4897.32   3
   3  -4  13 287271. 4415.32   1
  -4   1  13 287673. 4353.79   1
  -3   4 -13 276964. 4150.95   1
  -1  -3 -13 283232. 4892.37   1
  -1  -3 -10 62804.4 2098.49   1
  -3   4 -10 62227.3 1820.20   1
   4  -1 -10 65636.5 2112.02   3
  -4   1  10 65203.3 1862.06   1
   3  -4  10 62784.8 1854.51   1
  -3   4 -10 65371.9 2099.09   2
  -4   1  10 66599.1 2195.82   3
   1   3  10 71746.0 2257.22   1
  -4   1   7 142691. 2807.18   3
  -3   4  -7 148578. 2589.16   2
   4  -1  -7 143270. 2835.62   3
  -1  -3  -7 144529. 2855.36   1
   1   3   7 148370. 2904.69   1
   3  -4   7 144310. 2544.53   1
  -1  -3  -4 13621.8 755.858   1
  -3   4  -4 13742.2 582.944   2
  -4   1   4 13600.0 784.113   3
  -3   4  -4 13902.5 701.830   1
   1   3   4 13519.8 760.975   1
   4  -1  -4 14472.3 832.173   3
  -4   1   1 3449.54 402.490   3
   4  -1  -1 3396.09 407.774   3
  -1  -3  -1 3684.14 325.930   1
   1   3   1 3354.10 315.342   1
  -1  -3   2 31347.7 693.226   1
   1   3  -2 34571.6 1028.07   3
  -4   1  -2 32851.1 1335.62   1
  -1  -3   2 31044.2 1019.37   3
   4  -1   2 34377.0 1348.47   1
  -3   4   2 31214.7 817.918   3
   3  -4  -2 33445.5 854.273   3
   1   3  -2 31038.1 769.335   1
  -3   4   5 15919.5 858.799   1
   1   3  -5 16187.0 747.305   3
   3  -4  -5 16060.9 724.358   2
   4  -1   5 16266.3 989.149   1
  -1  -3   5 15595.7 751.879   3
   3  -4  -5 16927.0 823.715   3
  -3   4   5 16400.7 795.570   3
  -3   4   5 17704.6 769.376   2
  -4   1  -5 14870.3 996.103   1
   1   3  -8 73425.5 1800.74   3
   3  -4  -8 78505.0 2112.82   3
   4  -1   8 79692.7 2364.86   1
  -1  -3   8 74236.3 1149.54   1
  -4   1  -8 71262.8 2280.38   1
  -3   4   8 73278.0 2061.82   3
   3  -4  -8 72017.1 1963.95   2
  -3   4   8 75621.5 2106.54   1
   3  -4  -8 72871.4 2062.68   1
  -1  -3   8 74212.7 1959.54   3
  -3   4   8 76995.6 1990.89   2
  -4   1 -11 97195.8 2824.32   1
   3  -4 -11 104959. 2728.40   1
   1   3 -11 100937. 1696.90   1
  -3   4  11 101505. 2812.59   3
  -1  -3  11 102731. 1823.37   1
  -3   4  11 107255. 2712.64   2
  -1  -3  11 102696. 2671.54   3
   3  -4 -11 101960. 2759.22   2
   1   3 -11 101228. 2460.68   3
   1   3 -14 101334. 2107.02   1
  -1  -3  14 107076. 2271.73   1
  -3   4  14 107236. 3044.51   2
  -4   1 -14 103749. 3126.72   1
   1   3 -14 105702. 2856.93   3
  -1  -3  14 108889. 3017.21   2
   3  -4 -14 110489. 3062.31   1
   1   3 -17 43804.0 1612.63   1
  -4   1 -17 47769.3 2286.62   1
   3  -4 -17 47952.0 2228.46   1
  -1  -3  17 47279.7 1734.08   1
  -1  -3  17 45672.2 2193.56   2
   1   3 -20 19176.4 1209.84   1
   3  -4 -20 21667.2 1619.11   1
  -4   1 -20 20871.4 1632.67   1
  -1  -3  20 21660.1 1627.37   2
  -4   1 -23 1832.36 530.038   1
   3  -4 -23 1581.78 492.991   1
   1   3 -23 2162.95 480.550   1
  -1  -3  23 1690.25 382.501   2
   1   3 -26 6053.46 831.299   1
   3  -4 -26 5515.53 942.113   1
  -4   1 -26 5930.83 981.056   1
  -1  -3  26 5353.29 924.093   2
  -4   1 -29-1313.23 593.498   1
   3  -4 -29-64.8867 446.905   1
   1   3 -29 303.537 277.643   1
  -1  -3  29-1188.21 559.063   2
   1   3 -32-97.1764 309.744   1
  -4   1 -32-623.251 528.771   1
   3  -4 -32-272.165 453.177   1
  -4   1 -35-104.627 428.377   1
   3  -4 -35-146.217 404.735   1
  -4   1 -38-1107.31 682.303   1
   3  -4 -38 146.085 473.151   1
  -4   1 -41-943.337 681.484   1
   3  -4 -41 224.479 500.193   1
   0  -4 -41-628.561 620.599   1
   0  -4 -38 222.496 534.419   1
   0  -4 -35 2338.42 894.625   1
  -4   4 -35 2172.18 792.046   1
  -4   4 -32 7722.46 1274.70   1
  -4   0  32 7401.52 1296.86   2
   0  -4 -32 6624.37 1298.10   1
  -4   0  29 4219.39 942.982   2
  -4   4 -29 2609.97 740.264   1
   0  -4 -29 4287.94 1002.32   1
   0  -4 -26 747.346 535.232   1
  -4   0  26-737.894 610.453   2
  -4   4 -23 81.2723 591.523   1
  -4   0  23-915.576 743.161   2
   0  -4 -23 1489.46 433.409   1
   0  -4 -20 6520.14 899.174   1
  -4   4 -20 6163.59 806.526   1
  -4   0  20 5880.08 804.505   2
   4   0 -20 7243.54 939.160   3
   0  -4 -17 16531.7 1330.40   1
  -4   0  17 15837.4 1308.23   2
   4   0 -17 15041.4 1262.76   3
  -4   4 -17 14860.7 1174.53   1
   0  -4 -14 14143.8 1123.40   1
  -4   0  14 17198.3 1057.75   1
   4   0 -14 12841.5 1035.95   3
   4  -4  14 14965.7 1108.00   1
  -4   4 -14 14517.0 1070.55   1
  -4   4 -11 12909.3 1033.15   2
   4   0 -11 11201.0 903.667   3
  -4   4 -11 11357.9 937.277   1
   0  -4 -11 12508.3 1010.35   1
   4  -4  11 12387.2 934.086   1
  -4   0  11 11676.8 791.392   1
   0  -4  -8 36102.6 1496.43   1
  -4   4  -8 35975.5 1472.77   2
   4   0  -8 37034.2 1528.48   3
  -4   4  -8 32589.3 1454.27   1
  -4   0   8 33736.1 1441.49   3
   4  -4   8 35224.1 1453.06   1
   0   4   8 37131.4 1541.62   1
   0  -4  -5 173131. 2865.56   1
  -4   4  -5 165013. 3001.45   1
  -4   0   5 167660. 2925.70   3
   4   0  -5 166857. 3018.73   3
   0   4   5 173955. 2912.72   1
   4   0  -2 49730.1 1654.09   3
  -4   0   2 49059.0 1572.33   3
   0  -4  -2 49495.9 1292.04   1
   0   4   2 49704.0 1297.48   1
   0   4  -1 6788.48 430.207   3
   4   0   1 6614.78 601.086   1
   4  -4  -1 6576.32 425.310   3
   0  -4   1 7218.04 369.941   1
  -4   0  -1 6490.77 613.295   1
   0   4  -1 6945.89 370.891   1
  -4   4   1 6940.09 436.654   3
   0   4  -4 1592.67 210.016   3
   4  -4  -4 1239.75 223.533   3
  -4   4   4 1082.10 202.835   3
  -4   0  -4 1606.16 324.202   1
   0  -4   4 1408.02 202.216   3
   4   0   4 1483.69 330.891   1
  -4   4   7 23223.3 1107.11   3
  -4   0  -7 23032.8 1305.86   1
   4  -4  -7 24444.9 1116.73   3
  -4   4   7 24517.9 1046.96   2
   0  -4   7 23518.7 991.198   3
  -4   4   7 23091.6 1144.01   1
   0   4  -7 23076.9 912.834   3
   4   0   7 26199.0 1356.61   1
  -4   4  10 11635.6 900.721   1
   0   4 -10 10097.4 459.243   1
  -4   0 -10 9850.55 915.158   1
   4  -4 -10 11407.9 877.371   1
   0   4 -10 11091.8 766.936   3
   0  -4  10 10540.7 498.557   1
   0  -4  10 11450.8 819.072   3
   4   0  10 11720.3 968.696   1
   4  -4 -10 11619.8 916.520   3
  -4   4  10 11182.8 895.537   3
  -4   4  10 11941.2 864.073   2
   4  -4 -13 443.186 260.999   1
   0  -4  13 787.198 273.797   3
   0  -4  13 886.289 321.886   2
  -4   4  13 590.205 211.107   2
  -4   0 -13 722.285 343.322   1
   0  -4  13 661.622 177.701   1
   0   4 -13 812.825 204.261   1
   0   4 -13 707.312 305.820   3
   4  -4 -13 92.0487 248.377   3
   4  -4 -16 6009.02 748.036   1
  -4   0 -16 7304.08 907.817   1
   0  -4  16 6308.11 793.690   2
   0  -4  16 6066.33 586.401   1
   0   4 -16 6175.62 567.962   1
  -4   4  16 6722.55 828.157   2
   4  -4 -19 1551.80 471.870   1
   0   4 -19 2630.46 438.430   1
  -4   0 -19 2646.61 600.476   1
  -4   4  19 2417.06 575.176   2
   0  -4  19 1809.30 373.490   1
   0  -4  19 2824.54 616.045   2
   0   4 -22 118.550 203.820   1
  -4   0 -22 266.648 307.386   1
  -4   4  22-2.54997 368.342   2
   0  -4  22-203.769 366.870   2
  -4   0 -25-330.142 420.305   1
   0  -4  25-17.1451 314.378   2
   0   4 -25-169.831 274.034   1
   4  -4 -25-563.846 525.019   1
   0   4 -28 5.22698 240.553   1
  -4   0 -28-328.679 499.856   1
   0  -4  28-1.98231 358.090   2
   4  -4 -28-113.597 393.515   1
   0   4 -31 95.7911 262.887   1
   4  -4 -31 161.972 379.829   1
  -4   0 -31-623.388 527.677   1
   4  -4 -34 91.3262 406.593   1
  -4   0 -34-711.770 558.480   1
   4  -4 -37 1763.37 823.179   1
  -4   0 -37 872.764 702.290   1
  -4   0 -40 100.574 509.376   1
  -4   0 -43 57.7341 449.178   1
  -4  -1 -42 728.172 843.396   1
  -4  -1 -39 1763.88 938.724   1
  -4  -1 -36 742.505 724.815   1
  -4  -1 -33 338.645 572.763   1
  -4  -1 -30 774.907 688.014   1
   5  -4 -30 2515.61 780.140   1
  -1   5 -30 730.844 435.692   1
  -1   5 -27 4568.72 774.295   1
   5  -4 -27 4621.85 943.144   1
  -4  -1 -27 4585.98 979.035   1
   1  -5  27 5883.88 1005.88   2
  -4  -1 -24 188.838 552.676   1
  -1   5 -24 2141.10 482.625   1
  -5   4  24 1935.55 622.261   2
   1  -5  24 1602.26 595.883   2
   5  -4 -24 2581.41 669.554   1
  -1   5 -21 10584.1 933.978   1
   1  -5  21 10858.3 967.108   1
  -4  -1 -21 9527.03 1169.00   1
   5  -4 -21 12582.1 1244.26   1
   1  -5  21 13126.0 1268.48   2
  -5   4  21 12433.6 1342.97   2
  -1   5 -18 50910.2 1763.81   1
   5  -4 -18 59376.2 2654.69   3
  -4  -1 -18 55135.9 2647.70   1
  -5   4  18 53512.1 2486.80   2
   1  -5  18 56673.5 2423.21   2
   1  -5  18 52573.5 1853.55   1
   5  -4 -18 56916.8 2394.55   1
   1  -5  15 109267. 2359.26   1
   5  -4 -15 117766. 3458.31   3
  -1   5 -15 110459. 2210.84   1
   1  -5  15 111957. 3101.74   2
  -5   4  15 117666. 3335.81   2
  -4  -1 -15 117315. 3606.88   1
   1  -5  12 112304. 2044.82   1
  -1   5 -12 119726. 1872.55   1
   1  -5  12 119694. 2939.35   2
  -4  -1 -12 117311. 3385.89   1
  -5   4  12 128649. 3119.42   2
   5  -4 -12 129280. 3277.24   3
   1  -5  12 125435. 2949.32   3
   1  -5   9 71668.4 1888.64   3
   5  -4  -9 71269.6 2191.00   3
  -1   5  -9 66752.6 1053.72   1
  -5   4   9 72355.7 2231.17   3
  -5   4   9 71375.7 2044.41   2
  -1   5  -9 70605.3 1760.13   3
  -5   4   9 73741.6 2223.14   1
  -4  -1  -9 71411.3 2421.95   1
   1  -5   9 69920.4 1225.11   1
  -4  -1  -6 140469. 3229.98   1
   1  -5   6 133430. 2072.35   3
  -1   5  -6 138216. 1938.63   3
   4   1   6 146961. 3231.68   1
   5  -4  -6 137001. 2703.41   3
  -5   4   6 135176. 2650.75   3
  -4  -1  -3 214876. 3725.41   1
   1  -5   3 207147. 2029.51   3
   4   1   3 226438. 3772.00   1
  -1   5  -3 219392. 1879.25   1
  -5   4   3 216870. 2960.02   3
   5  -4  -3 216862. 3064.57   3
  -1   5  -3 218140. 1823.94   3
   1  -5   0 224100. 2523.79   1
  -4  -1   0 205171. 3425.23   1
   4   1   0 216100. 3434.07   1
   4   1   0 203797. 3729.94   3
  -5   4   0 221913. 3015.62   3
   5  -4   0 209118. 2954.20   3
  -1   5   0 208105. 2449.61   1
  -4  -1   3 274956. 3958.93   3
  -4  -1   3 284014. 3642.35   1
  -1   5   3 275360. 3428.27   1
   1  -5  -3 275117. 3454.17   1
   4   1  -3 275684. 4119.69   3
  -1   5   6 341168. 4394.13   1
   1  -5  -6 335923. 4364.12   1
   4   1  -6 331945. 4519.40   3
  -4  -1   6 324489. 4357.40   3
   5  -4   9 318540. 4774.31   1
   4   1  -9 328223. 4752.76   3
  -4  -1   9 325800. 4739.90   3
  -5   4 -12 149942. 3835.04   2
  -5   4 -12 144263. 3658.91   1
  -4  -1  12 143160. 2745.10   1
   4   1 -12 143186. 3381.26   3
   5  -4  12 162786. 3693.33   1
   1  -5 -12 160760. 3670.08   1
  -4  -1  15 20881.4 1161.62   1
  -5   4 -15 23318.9 1533.16   1
   4   1 -15 21028.2 1356.31   3
   1  -5 -15 24835.2 1604.45   1
  -4  -1  18 2071.91 606.219   2
   1  -5 -18 2340.91 669.421   1
  -5   4 -18 2240.05 575.708   1
   4   1 -18 2859.12 627.387   3
  -4  -1  21-286.243 420.506   2
  -5   4 -21-201.450 310.471   1
   1  -5 -21-266.231 436.989   1
   4   1 -21 361.456 363.329   3
   1  -5 -24 19.1422 424.399   1
  -4  -1  24-852.876 699.498   2
   1  -5 -27 3169.93 819.377   1
  -4  -1  27 2803.45 769.420   2
  -5   4 -27 1914.82 639.413   1
  -5   4 -30 11642.3 1548.71   1
  -4  -1  30 12990.3 1682.30   2
   1  -5 -30 8778.88 1419.62   1
  -4  -1  33 12787.6 1690.41   2
  -5   4 -33 11878.4 1681.20   1
   1  -5 -33 10046.5 1643.90   1
   1  -5 -36 4539.98 1233.60   1
  -5   4 -36 4320.70 1175.86   1
   1  -5 -39 1979.53 962.948   1
   1  -5 -42 637.676 836.211   1
  -3  -2 -40 68.2182 500.310   1
  -3  -2 -37 233.658 644.486   1
  -3  -2 -34-684.269 592.011   1
  -2   5 -31 470.426 406.251   1
  -3  -2 -31 31.9955 434.438   1
  -2   5 -28 1342.29 455.544   1
  -5   3  28 1353.77 567.276   2
  -3  -2 -28 660.135 519.078   1
  -5   3  25 5445.31 942.535   2
  -2   5 -25 5743.40 814.404   1
  -3  -2 -25 3464.04 709.521   1
   2  -5  22 649.555 357.141   2
  -5   3  22 866.626 433.342   2
  -2   5 -22 1132.78 341.464   1
  -5   3  19 1433.22 452.645   2
   2  -5  19 1404.00 422.594   2
   5  -3 -19 1554.25 488.946   3
  -2   5 -19 1877.98 397.448   1
  -3  -2 -19 772.074 359.385   1
   2  -5  19 1398.71 357.771   1
  -2   5 -16 390.417 173.499   1
  -3  -2 -16-68.8201 361.475   1
  -5   3  16 802.610 398.520   2
   2  -5  16 461.043 186.438   1
   5  -3 -16 996.361 414.180   3
   2  -5  13 37095.9 1396.91   1
   2  -5  13 37244.8 1635.41   2
   5  -3 -13 38063.0 1854.98   3
  -5   3  13 39383.7 1808.29   2
  -3  -2 -13 36590.5 1902.15   1
  -2   5 -13 36817.8 1288.58   1
   2  -5  13 36802.3 1655.71   3
   5  -3 -10 14521.8 1033.72   3
  -2   5 -10 14166.1 671.508   1
  -5   3  10 13904.8 953.398   1
   2  -5  10 13434.2 716.202   1
   2  -5  10 13618.6 876.525   3
  -3  -2 -10 12906.0 1003.30   1
   2  -5  10 14100.2 888.234   2
   5  -3  -7 14140.6 935.590   3
  -2   5  -7 14139.1 627.908   1
  -5   3   7 14467.3 918.547   3
  -3  -2  -7 14059.3 984.510   1
   2  -5   7 14428.4 750.325   2
   2  -5   7 14848.5 719.468   3
   3   2   7 16129.5 1039.44   1
   3   2   4 25039.1 1189.76   1
   5  -3  -4 24541.2 1125.83   3
   2  -5   4 24301.5 598.960   3
  -5   3   4 24211.8 1061.22   3
  -3  -2  -4 23917.3 1177.19   1
   3   2   1 1230.18 253.184   1
   5  -3  -1 1315.82 265.983   3
  -2   5  -1 1436.87 196.194   1
  -5   3   1 1704.36 279.722   3
  -2   5   2 5516.12 458.813   1
  -3  -2   2 5611.44 544.371   3
   3   2  -2 5922.75 485.478   1
  -3  -2   2 5747.74 485.126   1
   2  -5  -2 6213.85 480.619   1
   3   2  -2 5761.03 568.451   3
   3   2  -5 12782.8 825.506   3
   5  -3   5 13837.0 947.853   1
  -2   5   5 12793.2 805.687   1
   2  -5  -5 13929.0 848.955   1
  -5   3  -5 13340.0 991.151   1
  -3  -2   5 12805.9 800.051   3
   2  -5  -8 6555.88 654.119   2
  -3  -2   8 5973.86 606.155   3
  -2   5   8 5588.33 577.047   1
   3   2  -8 5842.79 615.690   3
  -5   3  -8 5522.31 688.610   1
  -2   5   8 5894.92 595.745   3
   5  -3   8 5939.22 658.524   1
   2  -5  -8 7612.98 725.605   1
  -3  -2  11 1706.35 264.346   1
  -3  -2  11 1521.13 321.919   3
  -2   5  11 1484.84 356.475   3
   2  -5 -11 1979.71 407.612   2
   3   2 -11 1148.51 295.064   3
   2  -5 -11 2546.74 480.025   1
  -5   3 -11 1479.89 372.847   1
   5  -3  11 2998.54 511.793   1
  -5   3 -14 21526.3 1468.99   1
   2  -5 -14 22200.3 1444.92   1
   3   2 -14 20386.5 1311.19   3
  -3  -2  14 20942.9 1063.22   1
  -3  -2  17 12238.2 1146.94   2
   2  -5 -17 11335.3 1131.78   1
   3   2 -17 11084.1 1042.79   3
  -5   3 -17 11260.3 1123.36   1
  -3  -2  17 11625.2 893.408   1
   2  -5 -20 1019.50 387.359   1
  -5   3 -20 1266.27 437.537   1
  -3  -2  20 365.939 413.747   2
   3   2 -20 1227.42 385.187   3
   2  -5 -23 2035.42 569.399   1
  -3  -2  23 1564.36 484.537   2
  -5   3 -23 2502.03 590.933   1
  -5   3 -26-1350.98 566.848   1
   2  -5 -26-368.207 498.236   1
  -3  -2  26-840.050 590.165   2
  -5   3 -29 0.93577 359.634   1
   2  -5 -29-368.538 511.416   1
  -3  -2  29-339.448 494.475   2
  -3  -2  32 1448.50 708.516   2
   2  -5 -32-742.460 672.536   1
  -5   3 -32 724.280 573.758   1
  -3  -2  35 216.565 443.058   2
  -5   3 -35 575.510 553.066   1
   2  -5 -35 261.937 469.726   1
  -5   3 -38-874.585 636.965   1
   2  -5 -38-143.516 477.864   1
   2  -5 -41 0.37151 457.503   1
  -2  -3 -41-551.231 607.475   1
  -2  -3 -38-319.032 522.636   1
  -2  -3 -35-1049.09 678.808   1
  -3   5 -32 803.765 563.390   1
  -5   2  32 1365.02 690.261   2
  -3   5 -29 494.361 418.688   1
  -2  -3 -29 203.461 459.463   1
  -5   2  29 241.676 448.803   2
  -2  -3 -26 449.624 452.935   1
  -5   2  26 400.345 457.305   2
  -3   5 -26 330.710 361.799   1
  -3   5 -23 699.236 376.238   1
  -5   2  23 1483.18 637.773   2
  -2  -3 -23 1006.91 529.046   1
  -3   5 -20 17668.5 1274.13   1
  -5   2  20 19679.9 1608.52   2
  -2  -3 -20 18531.5 1605.72   1
   5  -2 -20 20392.8 1658.11   3
  -3   5 -17 93338.4 2660.72   1
  -2  -3 -17 99903.5 3407.51   1
   3  -5  17 97920.6 2822.53   1
   5  -2 -17 104786. 3398.68   3
   3  -5  17 100608. 3046.65   2
  -5   2  17 96683.7 3200.36   2
  -3   5 -14 251992. 3916.82   1
  -2  -3 -14 256510. 4991.40   1
   3  -5  14 259478. 4433.28   2
   5  -2 -14 263223. 4918.28   3
   3  -5  14 250862. 4133.32   1
   3  -5  11 196154. 3227.12   1
   3  -5  11 192186. 3410.55   3
   5  -2 -11 202916. 4007.89   3
  -2  -3 -11 193975. 4030.36   1
   3  -5  11 210947. 3595.16   2
  -3   5 -11 191367. 3147.08   1
  -5   2  11 202753. 3618.19   1
   2   3   8 17837.6 1096.53   1
  -3   5  -8 15128.5 841.225   1
  -5   2   8 16439.6 1030.08   3
   3  -5   8 16388.0 853.624   2
   5  -2  -8 15715.1 1028.61   3
   3  -5   8 18733.9 890.403   1
  -2  -3  -8 16251.0 1057.04   1
  -2  -3  -5 86075.0 2165.52   1
   3  -5   5 90540.3 1553.70   2
  -5   2   5 86114.1 2130.38   3
  -3   5  -5 88548.8 1776.86   1
   2   3   5 90713.5 2249.50   1
   5  -2  -5 86365.1 2230.87   3
   5  -2  -2 301972. 4081.57   3
   2   3   2 302348. 3636.32   1
  -5   2   2 309500. 3979.44   3
  -2  -3  -2 298261. 3498.20   1
  -3   5   1 458802. 2582.58   3
   2   3  -1 462299. 4856.24   3
  -5   2  -1 477411. 5299.98   1
   2   3  -1 445388. 3989.72   1
  -2  -3   1 451070. 3758.79   1
   5  -2   1 460401. 5270.32   3
   3  -5  -1 487483. 2846.63   3
   2   3  -4 69997.6 1736.37   3
  -3   5   4 66481.7 1477.48   3
   3  -5  -4 66395.5 1373.77   2
  -2  -3   4 64074.3 1249.96   1
  -5   2  -4 62759.7 2151.31   1
   5  -2   4 70994.8 2164.31   1
  -3   5   4 66090.4 1773.63   1
  -2  -3   4 63916.5 1694.58   3
  -3   5   7 971.750 242.472   1
   2   3  -7 864.952 215.457   3
   5  -2   7 1309.09 313.112   1
   3  -5  -7 1081.51 275.883   1
  -2  -3   7 1861.22 314.728   3
  -3   5   7 767.327 205.709   3
  -5   2  -7 916.107 290.336   1
  -3   5  10 89107.2 2545.12   3
  -2  -3  10 86450.4 1540.85   1
  -5   2 -10 78045.1 2670.79   1
   3  -5 -10 87210.1 2522.45   1
  -2  -3  10 85878.0 2427.62   3
   2   3 -10 84817.9 2267.17   3
   3  -5 -10 86829.5 2476.01   2
  -5   2 -13 216713. 4636.38   1
   3  -5 -13 220215. 4421.04   1
  -2  -3  13 221129. 3063.65   1
   2   3 -13 215416. 3969.26   3
  -5   2 -16 55055.0 2504.16   1
   2   3 -16 58371.0 2290.26   3
   3  -5 -16 55935.2 2403.18   1
  -2  -3  16 56538.0 1795.15   1
   3  -5 -19 20953.7 1585.16   1
   2   3 -19 17307.1 1078.23   1
  -5   2 -19 18643.8 1591.29   1
   2   3 -19 19149.5 1454.66   3
  -2  -3  19 17085.5 1383.77   2
  -2  -3  19 18661.5 1170.80   1
  -2  -3  22 2636.33 630.868   2
   3  -5 -22 4044.20 845.243   1
  -5   2 -22 3182.97 728.271   1
   2   3 -22 4295.36 653.862   1
  -2  -3  25-73.5124 322.170   2
   3  -5 -25 103.438 378.043   1
   2   3 -25 708.547 352.972   1
  -5   2 -25-30.3993 333.552   1
   2   3 -28 289.459 279.521   1
   3  -5 -28 760.494 441.938   1
  -5   2 -28 57.7134 344.287   1
  -5   2 -31-73.1687 371.151   1
   3  -5 -31-259.220 467.995   1
  -2  -3  31 1034.04 646.818   2
   2   3 -31 266.190 331.618   1
  -5   2 -34-230.784 441.536   1
   3  -5 -34-116.252 508.350   1
  -2  -3  34-290.281 414.908   2
   3  -5 -37-874.356 599.450   1
  -5   2 -37-49.7720 399.258   1
   3  -5 -40-747.504 603.203   1
  -5   2 -40-1058.85 704.739   1
  -1  -4 -42-556.534 616.891   1
  -1  -4 -39-1334.18 789.483   1
  -1  -4 -36 54.9904 422.001   1
  -4   5 -33 232.451 412.278   1
  -1  -4 -33-238.833 524.629   1
  -5   1  33 60.8108 442.726   2
  -5   1  30 508.798 457.118   2
  -4   5 -30 619.501 434.700   1
  -4   5 -27-242.121 498.920   1
  -5   1  27-847.925 708.036   2
  -1  -4 -27 502.697 364.919   1
  -4   5 -24 362.207 306.965   1
  -1  -4 -24 867.617 457.925   1
  -5   1  24 1057.30 449.303   2
   5  -1 -21 8908.71 1100.36   3
  -1  -4 -21 7648.08 1025.39   1
  -5   1  21 6743.90 928.482   2
  -4   5 -21 5421.63 663.960   1
   5  -1 -18 9480.94 1063.04   3
  -1  -4 -18 9856.91 1112.35   1
  -4   5 -18 9290.98 948.926   1
   4  -5  15 5728.58 701.214   1
  -4   5 -15 5496.99 663.660   1
  -1  -4 -15 4679.54 671.095   1
   5  -1 -15 4633.85 675.208   3
  -4   5 -12 1.08042 143.358   1
   4  -5  12-122.060 273.894   1
  -1  -4 -12 166.657 216.042   1
  -4   5 -12 131.897 162.945   2
  -5   1  12 168.189 113.653   1
   5  -1 -12-158.696 313.465   3
   4  -5   9 270.210 177.370   1
  -4   5  -9 160.163 128.894   1
  -5   1   9 486.717 167.732   3
   5  -1  -9 464.740 287.752   3
  -1  -4  -9 954.157 381.840   1
  -4   5  -9 492.557 196.699   2
  -1  -4  -6 74541.2 2069.78   1
   5  -1  -6 76307.8 2208.46   3
   1   4   6 77471.7 2137.72   1
  -4   5  -6 73462.3 1997.38   1
  -4   5  -6 74780.0 1714.53   2
  -5   1   6 75953.5 2121.62   3
   5  -1  -3 19313.1 1097.10   3
  -1  -4  -3 18575.6 901.531   1
   1   4   3 18587.8 909.965   1
  -4   5  -3 19650.7 588.099   2
  -5   1   3 19765.0 1041.35   3
   1   4   0 78029.1 1571.00   1
   5  -1   0 76234.3 2257.51   3
  -4   5   0 81671.0 1341.18   3
   4  -5   0 78672.6 1257.86   3
  -5   1   0 80053.1 2213.01   1
  -1  -4   0 78219.9 1520.80   1
  -4   5   3 9120.34 534.565   3
   5  -1   3 11459.9 872.374   1
   1   4  -3 9019.90 435.661   1
   1   4  -3 9890.50 601.929   3
  -4   5   3 9949.35 458.454   2
  -1  -4   3 9211.24 608.782   3
  -1  -4   3 10213.4 399.988   1
  -5   1  -3 9344.20 838.905   1
   4  -5  -3 9730.92 558.291   3
   4  -5  -6 30334.8 1217.16   3
  -4   5   6 29135.1 1290.17   1
  -1  -4   6 28349.8 1108.41   3
  -4   5   6 30069.6 1182.36   3
  -4   5   6 30931.2 1101.97   2
   5  -1   6 33126.6 1559.45   1
  -5   1  -6 29284.3 1567.57   1
   1   4  -6 28950.7 1087.65   3
  -1  -4   9 4699.79 270.813   1
  -5   1  -9 4469.80 653.351   1
   4  -5  -9 4597.15 567.774   1
   4  -5  -9 4403.01 507.884   3
  -4   5   9 4912.41 574.966   3
   1   4  -9 5133.92 528.850   3
   5  -1   9 5547.48 703.666   1
  -4   5   9 5087.63 552.499   2
  -1  -4   9 5301.40 562.445   3
   1   4 -12-8.63451 162.310   3
  -5   1 -12 164.338 287.655   1
   4  -5 -12 151.322 229.188   1
  -1  -4  12-12.5575 110.576   1
  -1  -4  12 122.955 164.403   3
  -5   1 -15 2178.12 542.462   1
   1   4 -15 1564.60 219.187   1
   1   4 -15 2000.31 429.247   3
  -1  -4  15 1936.71 296.643   1
   4  -5 -15 1396.38 345.436   1
  -5   1 -18-174.578 358.472   1
  -1  -4  18 144.353 296.325   2
   1   4 -18 114.578 127.214   1
   4  -5 -18-430.638 402.314   1
  -1  -4  18 190.098 104.031   1
  -1  -4  21 573.767 201.702   1
  -5   1 -21 218.763 355.300   1
   4  -5 -21 905.754 401.002   1
   1   4 -21 395.537 194.373   1
  -1  -4  21 612.824 310.000   2
  -5   1 -24 699.658 437.494   1
   1   4 -24-260.768 305.303   1
  -1  -4  24 226.349 334.792   2
  -5   1 -27-917.899 536.019   1
   4  -5 -27-571.375 492.927   1
   1   4 -27-189.372 260.699   1
  -1  -4  27 41.6212 321.703   2
  -1  -4  30 489.743 452.809   2
  -5   1 -30 1.03966 384.154   1
   4  -5 -30 613.066 488.000   1
   1   4 -30 370.026 294.361   1
   4  -5 -33-135.984 416.820   1
  -5   1 -33 112.285 492.482   1
  -1  -4  33-22.7207 373.055   2
  -5   1 -36 325.066 459.104   1
   4  -5 -36 835.145 646.004   1
   4  -5 -39 398.337 630.269   1
  -5   1 -39 237.350 552.768   1
  -5   1 -42-264.871 530.408   1
   0  -5 -40 1623.49 929.787   1
   0  -5 -37 2490.39 1023.04   1
  -5   0  34 7553.60 1403.73   2
  -5   5 -34 6803.96 1307.75   1
   0  -5 -34 6512.09 1378.52   1
  -5   5 -31 11737.0 1578.50   1
   0  -5 -31 11497.8 1670.53   1
  -5   0  31 12054.0 1624.96   2
  -5   0  28 9373.19 1364.42   2
   0  -5 -28 9975.57 1469.29   1
  -5   5 -28 8905.07 1284.05   1
  -5   0  25 12172.0 1468.95   2
  -5   5 -25 9610.07 1208.52   1
   0  -5 -25 10911.5 1408.05   1
  -5   0  22-68.5450 619.567   2
  -5   5 -22-377.440 612.867   1
   0  -5 -22 1797.42 487.097   1
   5   0 -22 1683.43 506.883   3
  -5   0  19 9233.33 1084.23   2
   5   0 -19 10591.4 1135.10   3
   0  -5 -19 12336.9 1318.55   1
  -5   5 -19 10529.3 1152.55   1
  -5   5 -16 61775.1 2509.59   1
   0  -5 -16 67522.5 2726.25   1
   5   0 -16 63668.1 2559.55   3
   5   0 -13 60485.9 2363.24   3
   5  -5  13 62263.4 2305.49   1
   0  -5 -13 64280.9 2458.42   1
  -5   0  13 58031.2 1937.44   1
  -5   5 -13 60147.2 2325.69   1
   5   0 -10 302949. 4902.21   3
   5  -5  10 305251. 4733.51   1
  -5   5 -10 305070. 4774.31   2
  -5   5  -7 444625. 4794.65   2
   0   5   7 472049. 5507.56   1
  -5   0   7 447675. 5459.81   3
   5   0  -7 452543. 5704.39   3
  -5   5  -7 425009. 5555.33   1
   0  -5  -7 452069. 5344.45   1
   0  -5  -4 203388. 3182.11   1
   5   0  -4 194936. 3682.16   3
  -5   0   4 202014. 3492.20   3
   0   5   4 196637. 3152.21   1
  -5   0   1 263553. 4124.07   1
   0   5   1 255159. 3050.02   1
   0  -5  -1 264747. 3029.02   1
   5  -5   1 252873. 2954.43   3
  -5   0   1 263662. 4133.18   3
   5   0  -1 258809. 4358.58   3
   0   5  -2 459919. 3672.46   3
   0   5  -2 421631. 3050.90   1
   5   0   2 435334. 5402.08   1
   5  -5  -2 432098. 3996.12   3
   0  -5   2 450260. 3044.65   1
  -5   0  -2 415221. 5643.82   1
  -5   5   2 427602. 3839.22   3
   0  -5   5 271328. 3062.95   3
   5  -5  -5 276813. 3619.52   3
  -5   0  -5 266284. 4760.65   1
   0   5  -5 276881. 2901.99   3
  -5   5   5 273000. 3499.90   3
   0   5  -8 185107. 2782.71   3
   0  -5   8 187551. 2996.59   3
  -5   5   8 185286. 3557.50   1
  -5   5   8 191329. 3436.19   3
  -5   5   8 190453. 3174.51   2
  -5   0  -8 182798. 4087.13   1
   5  -5  -8 187831. 3407.67   3
   0   5 -11 295459. 4090.62   3
  -5   0 -11 302700. 5465.86   1
   5  -5 -11 301032. 4929.97   3
  -5   5  11 301996. 4605.90   2
   0  -5  11 298070. 4458.58   3
   0  -5  14 109941. 2033.47   1
   5  -5 -14 120860. 3410.31   3
  -5   0 -14 115269. 3618.97   1
   0  -5  14 110744. 3046.45   2
  -5   5  14 122350. 3266.90   2
   0   5 -14 105512. 1837.41   1
   0   5 -14 111885. 2910.95   3
   0  -5  17 63045.6 2569.87   2
   0   5 -17 56407.1 1655.31   1
   0  -5  17 60247.1 1811.34   1
   5  -5 -17 68158.5 2661.16   1
  -5   5  17 71384.0 2739.93   2
  -5   0 -17 66777.0 2928.39   1
   0  -5  20 48091.4 1867.40   1
  -5   0 -20 55020.1 2819.92   1
  -5   5  20 51490.9 2533.44   2
   5  -5 -20 56981.1 2618.54   1
   0   5 -20 46080.6 1722.97   1
   0  -5  20 59217.7 2639.47   2
  -5   5  23 11174.2 1277.46   2
   0  -5  23 11340.0 1279.94   2
   0   5 -23 8447.42 859.387   1
   5  -5 -23 9809.75 1258.50   1
  -5   0 -23 10451.1 1360.96   1
  -5   0 -26 4754.71 1006.45   1
   0   5 -26 3456.25 628.813   1
   0  -5  26 3731.79 854.063   2
   5  -5 -26 5002.39 966.583   1
   0   5 -29 1176.80 485.587   1
   5  -5 -29 3113.35 915.921   1
  -5   0 -29 2005.18 840.433   1
   0  -5  29 1638.92 676.192   2
   5  -5 -32 2808.56 940.526   1
  -5   0 -32 1942.94 879.705   1
  -5   0 -35 2246.96 942.333   1
  -5   0 -38 3096.83 1198.39   1
  -5   0 -41 1217.73 892.650   1
  -5  -1 -40 3859.84 1380.41   1
  -5  -1 -37 5290.58 1432.64   1
  -5  -1 -34 4937.86 1290.77   1
  -5  -1 -31 7494.89 1514.18   1
  -5  -1 -28 16880.9 1935.49   1
  -1   6 -28 11507.7 1196.02   1
   1  -6  28 16305.9 1691.75   2
   1  -6  25 20185.7 1756.97   2
  -6   5  25 19179.7 1767.42   2
  -1   6 -25 15508.0 1225.28   1
  -5  -1 -25 17892.9 1841.54   1
   1  -6  22 31886.4 1638.24   1
  -5  -1 -22 33959.9 2421.42   1
   1  -6  22 35632.9 2180.12   2
  -1   6 -22 30078.4 1503.70   1
  -6   5  22 35846.4 2286.24   2
  -5  -1 -19 95648.2 3737.86   1
   6  -5 -19 93018.5 3468.03   3
  -1   6 -19 78321.3 2117.48   1
   1  -6  19 78540.6 2308.31   1
   1  -6  19 89074.2 3146.13   2
  -6   5  19 90754.4 3275.44   2
  -6   5  16 49147.0 2322.14   2
   6  -5 -16 50205.5 2374.61   3
   1  -6  16 45759.5 1513.64   1
   1  -6  16 51703.5 2215.76   2
  -1   6 -16 46533.3 1374.16   1
   6  -5 -13 197809. 4302.45   3
   1  -6  13 180200. 3800.49   2
   1  -6  13 164567. 2351.23   1
   1  -6  13 186343. 3780.95   3
  -5  -1 -13 196966. 4717.26   1
  -1   6 -13 179020. 2135.90   1
  -6   5  13 190696. 3999.14   2
  -1   6 -10 539838. 5232.74   3
  -5  -1 -10 538484. 7401.47   1
   1  -6  10 555168. 5589.52   3
  -6   5  10 543857. 6021.77   2
   6  -5 -10 534896. 6484.00   3
   1  -6   7 329470. 3525.81   3
  -6   5   7 342899. 4515.47   3
   6  -5  -7 333859. 4624.96   3
  -1   6  -7 338594. 3307.14   3
  -6   5   4 419179. 4525.15   3
  -1   6  -4 409413. 2625.95   1
   6  -5  -4 421529. 4796.86   3
   1  -6   4 415897. 3313.78   3
  -1   6  -4 411243. 2933.93   3
  -5  -1  -4 413646. 5835.95   1
   5   1   1 957206. 8073.89   1
  -1   6  -1 901552. 4856.29   3
   1  -6   1 930309. 5284.93   1
   5   1   1 873565. 8793.38   3
  -1   6  -1 906481. 5316.52   1
   6  -5  -1 936877. 6749.15   3
  -5  -1  -1 879053. 8213.32   1
  -6   5   1 999999. 6754.05   3
  -1   6   2 858088. 6174.02   1
  -5  -1   2 853229. 7506.55   1
   5   1  -2 860681. 8288.14   3
   1  -6  -2 852987. 6174.24   1
   6  -5   2 858756. 6687.92   3
  -5  -1   2 853695. 7841.44   3
   5   1  -5 503578. 6190.23   3
  -1   6   5 499551. 5399.88   1
  -5  -1   5 494022. 5759.98   3
   1  -6  -5 512148. 5472.04   1
  -6   5  -5 488471. 6193.26   1
  -6   5  -8 400696. 6059.81   1
   5   1  -8 418929. 5790.62   3
   6  -5  11 124775. 3317.60   1
   5   1 -11 126678. 3295.07   3
  -6   5 -11 121843. 3325.40   2
  -6   5 -11 120044. 3494.40   1
  -6   5 -14 54881.3 2456.52   1
  -5  -1  14 48821.3 1753.31   1
   1  -6 -14 49223.6 2282.28   1
   5   1 -14 52657.6 2274.61   3
   1  -6 -17 52861.8 2578.44   1
   5   1 -17 59421.4 2570.45   3
  -6   5 -17 60195.2 2679.88   1
   5   1 -20 32024.3 2013.30   3
  -5  -1  20 34513.5 2178.19   2
   1  -6 -20 30178.5 2054.13   1
  -6   5 -20 34814.8 2215.19   1
   1  -6 -23 59374.1 3069.82   1
   5   1 -23 58346.7 2889.11   3
  -6   5 -23 65152.5 3152.63   1
  -5  -1  23 63047.6 3075.20   2
   1  -6 -26 37873.2 2605.30   1
  -6   5 -26 33797.6 2459.90   1
  -5  -1  26 33541.1 2447.34   2
  -6   5 -29 11655.4 1580.97   1
   1  -6 -29 11232.6 1627.27   1
  -5  -1  29 13765.9 1695.66   2
  -5  -1  32 14424.7 1850.25   2
  -6   5 -32 12746.4 1742.95   1
   1  -6 -32 10487.6 1711.92   1
   1  -6 -35 6465.32 1423.31   1
  -5  -1  35 7040.35 1462.43   2
  -6   5 -35 5610.99 1308.05   1
   1  -6 -38 2564.88 1037.27   1
   1  -6 -41 3276.49 1279.05   1
  -4  -2 -41 284.580 657.911   1
  -4  -2 -38 2917.89 1145.09   1
  -4  -2 -35 2001.50 922.757   1
  -4  -2 -32 4581.96 1202.55   1
  -4  -2 -29 4924.41 1164.64   1
  -6   4  29 5455.08 1074.44   2
  -2   6 -29 3570.62 714.976   1
  -4  -2 -26-223.349 509.616   1
  -6   4  26 46.0246 368.646   2
  -2   6 -26-216.231 294.490   1
   2  -6  26-148.601 371.364   2
   2  -6  23 67.5833 294.000   2
  -2   6 -23 111.704 204.376   1
  -6   4  23-661.352 526.967   2
   6  -4 -20 138.298 309.846   3
  -6   4  20-523.972 514.462   2
   2  -6  20 573.694 353.413   2
  -4  -2 -20 238.229 378.671   1
  -2   6 -20 212.459 176.651   1
   2  -6  20 53.6894 139.844   1
  -2   6 -17 7933.62 685.441   1
  -6   4  17 8432.71 990.686   2
   6  -4 -17 8885.48 1038.00   3
  -4  -2 -17 7077.69 970.580   1
   2  -6  17 7283.91 856.836   2
   2  -6  17 7451.03 715.113   1
   6  -4 -14 34608.6 1856.30   3
  -6   4  14 30932.1 1681.79   2
  -2   6 -14 30280.6 1136.32   1
   2  -6  14 28285.5 1176.66   1
   2  -6  14 31287.8 1587.96   2
   2  -6  14 30001.1 1554.75   3
  -4  -2 -14 34309.1 1941.73   1
  -4  -2 -11 120252. 3410.34   1
   6  -4 -11 126859. 3284.62   3
  -2   6 -11 121758. 1898.86   1
   2  -6  11 122892. 2732.25   3
   2  -6  11 125335. 2804.60   2
   2  -6  11 129721. 2163.48   1
  -6   4   8 165867. 3331.33   3
   2  -6   8 165671. 2567.94   3
  -4  -2  -8 170530. 3771.76   1
   6  -4  -8 167502. 3406.49   3
   6  -4  -5 146764. 3022.00   3
   2  -6   5 145741. 1712.14   3
  -4  -2  -5 145850. 3301.57   1
  -6   4   5 144534. 2794.78   3
   6  -4  -2 104582. 2427.66   3
  -2   6  -2 100348. 1686.27   1
  -6   4   2 109639. 2341.57   3
  -4  -2  -2 98355.0 2522.39   1
   4   2   2 114257. 2707.73   1
   6  -4   1 11928.6 844.869   3
  -2   6   1 14201.3 753.256   1
   4   2  -1 13204.9 861.536   1
   2  -6  -1 13401.2 720.177   1
   4   2  -1 12201.1 956.294   3
  -4  -2   4 24451.9 1245.68   3
   2  -6  -4 25455.6 1169.21   1
  -2   6   4 23513.0 1103.56   1
  -4  -2   4 24808.2 1115.67   1
   4   2  -4 24080.8 1273.54   3
  -6   4  -4 24449.7 1388.13   1
   4   2  -7 174699. 3434.09   3
   2  -6  -7 177699. 3454.10   1
  -2   6   7 171792. 3357.51   1
  -4  -2   7 169510. 3320.40   3
   4   2 -10 84831.7 2542.00   3
   6  -4  10 81072.7 2659.36   1
   2  -6 -10 92464.6 2722.79   1
  -6   4 -10 82742.3 2886.76   1
   2  -6 -10 84056.0 2627.10   2
  -6   4 -13 67349.5 2710.34   1
   4   2 -13 63601.3 2362.76   3
  -4  -2  13 67376.3 1841.77   1
   2  -6 -13 70344.3 2580.06   1
  -4  -2  16 61054.8 1999.87   1
  -6   4 -16 65897.8 2803.02   1
   2  -6 -16 61503.5 2604.32   1
   4   2 -16 67185.1 2560.28   3
   4   2 -19 19514.8 1493.89   3
  -6   4 -19 20177.1 1648.60   1
   2  -6 -19 16623.6 1457.36   1
   2  -6 -22 3517.60 624.403   1
  -4  -2  22 5355.76 910.525   2
   4   2 -22 5094.36 840.812   3
  -6   4 -22 6313.17 1027.89   1
  -6   4 -25 6960.13 1128.46   1
  -4  -2  25 7446.69 1125.43   2
  -6   4 -28 2871.99 861.291   1
  -4  -2  28 3132.09 826.157   2
   2  -6 -28 2004.52 735.022   1
  -6   4 -31 2138.06 822.512   1
  -4  -2  31 2672.90 858.840   2
   2  -6 -31 101.563 600.943   1
   2  -6 -34 2227.26 896.074   1
  -4  -2  34 3024.87 966.255   2
  -6   4 -34 2324.22 925.941   1
  -6   4 -37 2418.20 943.238   1
  -4  -2  37 2559.43 942.167   2
   2  -6 -37 1725.03 854.778   1
   2  -6 -40 1179.32 830.144   1
  -3  -3 -42-1957.20 960.987   1
  -3  -3 -39-1722.69 872.988   1
  -3  -3 -36-614.635 607.087   1
  -3  -3 -33 3127.30 1011.58   1
  -3  -3 -30 1236.40 638.905   1
  -6   3  30 1145.29 586.009   2
  -3   6 -30 574.510 357.966   1
  -3  -3 -27-1022.77 552.493   1
  -6   3  27-22.3419 424.559   2
  -3   6 -27-123.463 370.275   1
  -3  -3 -24 15377.7 1614.91   1
  -6   3  24 15827.1 1584.11   2
  -3   6 -24 14694.9 1262.59   1
   3  -6  21 18182.3 1458.66   2
   6  -3 -21 15740.0 1491.36   3
  -3   6 -21 16626.9 1237.77   1
  -6   3  21 17009.0 1565.47   2
  -3  -3 -21 17326.7 1616.32   1
  -3   6 -18 12597.1 974.212   1
   3  -6  18 11645.1 1107.80   2
  -6   3  18 10903.9 1146.22   2
   3  -6  18 11617.7 986.386   1
  -3  -3 -18 10683.5 1175.33   1
   6  -3 -18 12140.5 1223.93   3
  -6   3  15 44709.9 2098.98   2
  -3  -3 -15 45330.0 2257.18   1
   3  -6  15 41544.8 1659.89   1
   3  -6  15 43282.9 1921.06   2
   6  -3 -15 47786.2 2229.52   3
  -3   6 -15 43161.7 1603.10   1
   3  -6  12 10243.9 845.073   2
  -3  -3 -12 10316.3 1003.21   1
  -3   6 -12 10589.1 705.507   1
   6  -3 -12 10357.4 973.416   3
   3  -6  12 9975.95 821.643   3
   3  -6  12 11134.5 769.153   1
   3  -6   9 3341.94 405.146   3
  -3  -3  -9 2092.79 259.752   1
   3  -6   9 3538.84 435.321   2
   6  -3  -9 3168.46 493.588   3
  -3   6  -9 3099.69 381.399   1
   3  -6   6 9218.00 549.743   2
   6  -3  -6 8354.16 767.187   3
   3   3   6 9535.90 808.859   1
  -3  -3  -6 8032.93 754.886   1
  -3   6  -6 9323.02 579.981   1
   3  -6   6 8903.74 478.233   3
  -6   3   6 8877.38 727.587   3
   3   3   3 131057. 2757.00   1
   6  -3  -3 125075. 2803.21   3
  -6   3   3 130243. 2695.09   3
  -3  -3  -3 124209. 2676.35   1
   3   3   0 19411.0 1167.23   3
   3   3   0 22262.8 1076.74   1
  -3  -3   0 20008.8 975.482   1
  -6   3   0 21917.3 1158.15   3
  -3   6   0 20160.1 874.359   1
   6  -3   0 22180.4 1209.91   3
  -3   6   3 19191.1 735.943   3
  -3  -3   3 18168.1 865.851   1
  -3   6   3 19755.2 984.528   1
  -3  -3   3 17988.1 1034.68   3
   3   3  -3 19084.3 1078.60   3
  -6   3  -3 18898.7 1223.56   1
   3   3  -3 20568.2 900.015   1
  -3  -3   6 73785.7 2045.13   3
   3   3  -6 75476.0 2110.98   3
   3  -6  -6 75962.6 2168.04   1
  -6   3  -6 70496.9 2540.35   1
   3  -6  -6 72474.6 1835.26   2
  -3   6   6 75486.9 1901.66   3
  -3  -3   6 79837.0 1657.11   1
   6  -3   6 80681.5 2541.14   1
  -3   6   6 71449.5 2115.02   1
   6  -3   9 546.710 216.367   1
   3   3  -9 316.338 187.768   3
  -3  -3   9 280.339 163.825   3
  -6   3  -9 273.152 215.030   1
  -3   6   9 330.727 168.049   3
   3  -6  -9 513.785 273.725   1
   3  -6  -9 1145.54 279.273   2
   3   3 -12 28228.2 1477.40   3
  -3  -3  12 28906.5 1054.90   1
   3  -6 -12 28591.5 1592.31   1
  -6   3 -12 26058.8 1671.91   1
   3  -6 -15 27767.5 1673.18   1
  -3  -3  15 27667.4 1204.08   1
  -6   3 -15 28875.4 1865.06   1
   3   3 -15 27991.6 1594.17   3
  -3  -3  18 36.3654 106.888   1
   3   3 -18-47.9185 261.718   3
  -6   3 -18 192.117 274.422   1
  -3  -3  21 10053.5 1189.64   2
  -6   3 -21 11576.8 1332.23   1
   3  -6 -21 10836.7 1287.51   1
   3   3 -21 10019.6 1115.63   3
  -6   3 -24 2909.09 784.820   1
   3  -6 -24 3423.57 803.618   1
  -3  -3  24 3145.56 777.756   2
   3  -6 -27-329.775 477.501   1
  -6   3 -27 319.780 469.471   1
  -3  -3  27 329.842 366.571   2
   3  -6 -30 999.907 647.519   1
  -6   3 -30 1811.90 802.081   1
  -3  -3  30 2224.37 837.391   2
  -6   3 -33 1378.60 780.403   1
  -3  -3  33 1486.26 739.815   2
   3  -6 -33 329.618 502.170   1
  -6   3 -36-38.4784 409.406   1
   3  -6 -36-149.080 442.168   1
  -3  -3  36-79.9732 405.524   2
   3  -6 -39-1040.36 705.013   1
  -6   3 -39 600.202 668.743   1
   3  -6 -42 187.194 595.328   1
  -2  -4 -40-1628.63 843.759   1
  -2  -4 -37-1507.58 777.398   1
  -6   2  34-26.0386 335.112   2
  -2  -4 -34-2081.10 856.027   1
  -4   6 -31 1279.48 577.768   1
  -6   2  31 636.675 558.359   2
  -6   2  28-115.464 429.244   2
  -2  -4 -28 398.432 416.237   1
  -4   6 -28 331.784 311.726   1
  -6   2  25 2749.36 689.536   2
  -2  -4 -25 2592.96 713.900   1
  -4   6 -25 2242.70 575.420   1
  -4   6 -22 7157.66 899.684   1
  -6   2  22 6931.52 1016.28   2
  -2  -4 -22 7342.84 1111.12   1
   6  -2 -22 7264.09 1021.02   3
  -2  -4 -19 14.9212 356.654   1
   6  -2 -19-120.937 308.239   3
  -6   2  19-706.226 619.781   2
   6  -2 -16 9969.28 1061.04   3
  -4   6 -16 10710.4 926.363   1
  -2  -4 -16 12265.0 1199.31   1
   4  -6  16 9325.66 870.511   1
  -2  -4 -13 42869.5 2092.53   1
  -4   6 -13 43469.7 1729.33   1
   4  -6  13 43253.2 1721.37   1
   4  -6  10 1562.28 298.573   2
  -2  -4 -10 1736.54 418.170   1
  -4   6 -10 1530.24 318.770   1
   6  -2 -10 1527.17 376.840   3
   6  -2  -7 62934.4 2199.68   3
  -4   6  -7 61684.9 1838.51   1
  -6   2   7 63964.2 2058.32   3
   4  -6   7 64001.2 1542.96   2
  -2  -4  -7 61624.6 2092.92   1
   2   4   7 69489.4 2186.89   1
  -2  -4  -4 26841.8 1223.32   1
   6  -2  -4 27598.8 1388.23   3
   2   4   4 28199.5 1264.78   1
  -6   2   4 26612.0 1269.26   3
  -6   2   1 81588.1 2282.33   3
   2   4   1 80473.0 1907.09   1
  -2  -4  -1 76681.6 1795.89   1
   6  -2  -1 76229.8 2344.91   3
   2   4  -2 124740. 2151.98   1
   2   4  -2 124884. 2622.12   3
  -2  -4   2 120779. 1920.95   1
  -6   2  -2 120751. 3111.47   1
   4  -6  -2 126601. 1830.94   3
  -4   6   2 118812. 1687.62   3
  -6   2  -5 147552. 3734.46   1
  -4   6   5 157654. 3048.18   1
  -4   6   5 155950. 2559.67   3
  -2  -4   5 145486. 1857.82   1
   4  -6  -5 168471. 2751.02   3
   2   4  -5 165298. 2859.86   3
   4  -6  -5 156058. 2263.58   2
   6  -2   5 166550. 3629.09   1
  -2  -4   5 157120. 2848.00   3
  -4   6   8 27274.6 1281.08   3
   4  -6  -8 24426.2 1143.74   2
   4  -6  -8 25842.0 1342.11   1
  -2  -4   8 26322.7 1240.58   3
  -2  -4   8 23325.2 616.379   1
  -6   2  -8 24552.9 1581.53   1
   2   4  -8 24850.5 1188.52   3
   4  -6 -11 28983.2 1474.77   2
  -2  -4  11 28522.9 1463.01   3
  -6   2 -11 26418.3 1717.38   1
  -2  -4  11 27889.0 849.018   1
   4  -6 -11 29014.6 1565.05   1
   2   4 -11 29073.5 1377.08   3
   2   4 -14 65240.3 2276.80   3
  -2  -4  14 66803.2 1629.99   1
   4  -6 -14 68143.6 2574.22   1
  -6   2 -14 65316.6 2831.69   1
  -6   2 -17 39061.0 2251.15   1
   2   4 -17 35645.3 1858.65   3
   4  -6 -17 40485.0 2132.27   1
  -2  -4  17 36249.6 1401.78   1
  -6   2 -20 11714.5 1337.44   1
   4  -6 -20 12119.6 1253.23   1
  -2  -4  20 11500.4 1223.49   2
  -2  -4  20 10631.2 876.136   1
   2   4 -20 9565.37 1037.75   3
  -2  -4  23 20977.0 1791.32   2
  -6   2 -23 21070.2 1916.87   1
   4  -6 -23 21006.2 1832.82   1
  -6   2 -26 3516.55 907.881   1
   4  -6 -26 4026.35 877.261   1
  -2  -4  26 4018.12 871.203   2
   4  -6 -29 87.4932 435.569   1
  -2  -4  29 1112.25 671.556   2
  -6   2 -29 799.811 622.211   1
  -2  -4  32 2074.74 758.544   2
   4  -6 -32 637.434 595.291   1
  -6   2 -32 2685.62 933.276   1
  -6   2 -35 427.434 519.939   1
  -2  -4  35 381.207 433.094   2
   4  -6 -35 285.532 457.531   1
   4  -6 -38-179.137 452.604   1
  -6   2 -38-97.0908 479.310   1
  -6   2 -41 733.347 841.331   1
   4  -6 -41-322.279 527.447   1
  -1  -5 -41 659.294 698.289   1
  -1  -5 -38 233.689 583.941   1
  -6   1  35 53.3124 405.932   2
  -1  -5 -35 361.123 508.153   1
  -5   6 -32 484.853 480.972   1
  -6   1  32 251.238 475.313   2
  -5   6 -29-166.979 335.395   1
  -6   1  29-680.278 504.590   2
  -5   6 -26 190.054 301.170   1
  -1  -5 -26 832.375 509.737   1
   6  -1 -23 511.594 363.216   3
  -5   6 -23-242.942 587.361   1
  -6   1  23-214.057 555.725   2
  -1  -5 -23 445.400 408.581   1
  -6   1  20 3527.78 550.244   2
  -1  -5 -20 5504.38 907.203   1
   6  -1 -20 5080.30 828.920   3
  -5   6 -20 5678.18 806.826   1
  -1  -5 -17 58523.6 2660.89   1
   6  -1 -17 60865.9 2617.82   3
  -5   6 -17 58955.8 2401.11   1
  -1  -5 -14 55081.1 2361.92   1
  -5   6 -14 53384.2 2184.60   1
   6  -1 -14 53015.1 2342.76   3
   5  -6  14 50380.6 2059.78   1
  -5   6 -11 8655.65 843.302   1
  -5   6 -11 7653.18 744.194   2
   5  -6  11 8711.84 800.278   1
   6  -1 -11 8597.16 899.829   3
  -1  -5 -11 9979.99 950.023   1
   6  -1  -8 56899.9 2185.62   3
  -5   6  -8 54406.1 2000.01   1
  -5   6  -8 56551.1 1752.09   2
  -1  -5  -5 10721.3 799.574   1
  -6   1   5 11660.3 869.874   3
   6  -1  -5 10813.9 927.653   3
  -5   6  -5 10446.6 573.344   2
   1   5   5 11102.3 822.859   1
  -1  -5  -2 24805.2 1054.89   1
   6  -1  -2 24490.7 1392.64   3
  -6   1   2 26202.3 1348.69   3
   5  -6   2 23271.9 811.628   3
   1   5   2 25675.7 1088.47   1
   1   5  -1 7648.80 629.189   3
  -1  -5   1 8271.24 508.323   1
   1   5  -1 7874.05 523.258   1
   6  -1   1 8030.15 839.592   3
  -6   1  -1 8925.34 866.366   1
  -5   6   1 8384.89 495.025   3
   5  -6  -1 8795.47 518.928   3
  -1  -5   4 112590. 1360.38   1
   1   5  -4 119741. 2212.48   3
   1   5  -4 105212. 1526.06   1
  -1  -5   4 111247. 2267.38   3
   5  -6  -4 116198. 2220.02   3
  -5   6   4 116347. 1837.33   2
  -5   6   4 111712. 2083.85   3
  -6   1  -4 116002. 3311.15   1
   6  -1   4 119086. 3072.28   1
  -6   1  -7 40929.2 2086.11   1
   5  -6  -7 47021.9 1642.54   3
  -5   6   7 45301.1 1455.60   2
  -5   6   7 45049.4 1589.88   3
  -1  -5   7 43725.5 1487.04   3
   1   5  -7 43697.8 1413.92   3
  -5   6  10 20706.9 1253.30   3
  -6   1 -10 17992.7 1388.45   1
   1   5 -10 21100.7 1105.00   3
   5  -6 -10 20846.2 1226.31   3
  -1  -5  10 21110.2 1174.49   3
  -6   1 -13 27411.8 1730.89   1
   1   5 -13 29990.9 1456.34   3
  -5   6  13 26358.7 1439.42   2
  -1  -5  13 27594.8 850.580   1
   5  -6 -13 31946.2 1702.84   1
  -5   6  16-426.612 410.123   2
  -6   1 -16-478.391 625.014   1
   1   5 -16-159.471 316.961   3
  -1  -5  16 74.8213 111.643   1
   5  -6 -16 104.224 303.568   1
  -1  -5  19 5733.59 793.478   2
  -1  -5  19 6150.88 603.009   1
  -6   1 -19 6451.83 971.346   1
   1   5 -19 4438.73 396.568   1
   5  -6 -22-174.262 433.937   1
  -1  -5  22 158.496 370.740   2
  -6   1 -22 31.0907 409.321   1
   1   5 -22 17.4247 273.078   1
   5  -6 -25 494.793 357.275   1
   1   5 -25 416.662 202.330   1
  -1  -5  25 419.202 317.006   2
  -6   1 -25 49.3589 396.362   1
  -1  -5  28 1280.07 540.846   2
  -6   1 -28 1006.60 530.479   1
   1   5 -28 782.398 298.502   1
   5  -6 -28 1928.64 651.820   1
  -1  -5  31 4414.83 991.253   2
  -6   1 -31 5429.19 1201.40   1
   5  -6 -31 5192.90 1100.19   1
   5  -6 -34 2433.00 885.285   1
  -1  -5  34 1113.66 695.482   2
  -6   1 -34 1438.54 780.178   1
  -6   1 -37 1794.95 935.409   1
  -6   1 -40 910.536 864.656   1
   0  -6 -39 1337.00 902.843   1
  -6   0  36 1591.06 815.263   2
   0  -6 -36 2757.18 1047.11   1
  -6   6 -33 3101.59 977.403   1
  -6   0  33 3226.20 1007.72   2
   0  -6 -33 3440.79 1172.67   1
   0  -6 -30 4935.10 1147.05   1
  -6   0  30 5472.32 1157.06   2
  -6   6 -30 4444.72 1020.96   1
   0  -6 -27 13189.5 1656.31   1
  -6   0  27 15092.9 1688.95   2
  -6   6 -27 13898.8 1599.10   1
  -6   0  24 40665.6 2560.96   2
  -6   6 -24 40568.7 2493.51   1
   6   0 -24 39770.1 2505.65   3
   0  -6 -24 42080.8 2665.13   1
   0  -6 -21 38493.1 2426.17   1
  -6   0  21 36719.3 2251.92   2
   6   0 -21 36804.9 2254.03   3
  -6   6 -21 39751.0 2342.73   1
   6   0 -18 20045.7 1572.84   3
  -6   6 -18 20052.7 1554.19   1
   0  -6 -18 19801.3 1651.29   1
   0  -6 -15 62339.0 2643.56   1
  -6   6 -15 56979.2 2496.65   1
   6   0 -15 56223.7 2498.03   3
   6  -6  12 24593.5 1468.49   1
  -6   6 -12 24217.0 1570.12   1
   0  -6 -12 25272.0 1541.74   1
  -6   6 -12 22372.3 1437.15   2
   6   0 -12 22011.9 1469.30   3
   0  -6  -9 64335.3 2253.39   1
  -6   6  -9 60223.9 2044.04   2
   6   0  -9 61813.7 2350.50   3
  -6   0   6 280175. 4468.99   3
   0  -6  -6 283372. 4293.96   1
   6   0  -6 288246. 4970.17   3
   0   6   6 293480. 4416.11   1
  -6   6  -6 271546. 4610.26   1
  -6   0   3 328440. 4940.88   3
   0  -6  -3 315663. 4039.71   1
   6  -6   3 308749. 3728.41   3
   6   0  -3 315755. 5207.98   3
   0   6   3 324200. 4121.42   1
   6  -6   0 603698. 5011.46   3
   6   0   0 620265. 7667.21   3
   0  -6   0 633940. 4841.94   1
  -6   6   0 633656. 5245.67   3
  -6   0   0 633340. 7188.98   1
   0   6   0 611426. 4870.53   1
   6   0   3 535538. 6564.67   1
   6  -6  -3 531781. 5022.78   3
  -6   6   3 533197. 4774.78   3
   0  -6   3 560468. 3513.07   1
   0   6  -3 556784. 4329.57   3
  -6   0  -3 514575. 7070.20   1
   0   6  -3 520938. 3476.88   1
   6  -6  -6 189019. 3381.94   3
   0   6  -6 186595. 2641.05   3
  -6   0  -6 192645. 4482.32   1
  -6   6   6 189348. 3211.14   3
   0  -6   6 188326. 2797.01   3
  -6   6   6 199279. 2879.43   2
  -6   6   9 169034. 3469.57   3
   0  -6   9 163805. 3041.89   3
   6  -6  -9 169473. 3501.33   3
   0   6  -9 164686. 2801.52   3
  -6   6   9 168155. 3185.46   2
  -6   0  -9 159602. 4176.69   1
  -6   6  12 81830.5 2547.11   2
  -6   0 -12 77542.5 3053.42   1
   6  -6 -12 80778.1 2738.49   3
   0  -6  12 83240.3 2477.05   3
   0   6 -12 82666.2 2299.12   3
   0   6 -15 14738.5 1102.39   3
  -6   6  15 13892.5 1208.03   2
  -6   0 -15 14913.4 1454.04   1
   0  -6  15 11764.9 655.385   1
   6  -6 -15 16028.3 1337.34   3
   0   6 -15 12334.6 575.851   1
   0  -6  18 6733.56 592.190   1
   0  -6  18 9439.34 1051.14   2
   0   6 -18 6746.47 534.386   1
  -6   6  18 9917.76 1133.18   2
  -6   6  21 27352.0 1904.12   2
   0   6 -21 19511.8 1076.03   1
   0  -6  21 20541.6 1177.82   1
   0  -6  21 29202.5 1946.02   2
  -6   0 -21 27519.1 2142.24   1
   0   6 -24 14829.1 1090.00   1
  -6   0 -24 15282.8 1691.54   1
   0   6 -27 11024.6 1056.71   1
  -6   0 -27 12746.7 1716.69   1
   0  -6  27 12777.5 1507.69   2
   0  -6  30 11182.9 1512.23   2
  -6   0 -30 11204.2 1724.19   1
   0  -6  33 4353.20 1059.02   2
  -6   0 -33 4493.84 1231.14   1
  -6   0 -36 1692.32 1005.92   1
  -6   0 -39 3811.85 1255.61   1
  -6   0 -42 400.901 767.427   1
  -6  -1 -41 314.475 741.555   1
  -6  -1 -38 3550.81 1219.83   1
  -6  -1 -35 1936.47 996.525   1
  -6  -1 -32 6635.69 1406.78   1
   1  -7  29 8771.21 1330.26   2
  -6  -1 -29 10164.1 1666.15   1
  -6  -1 -26 22591.3 2189.63   1
  -7   6  26 19393.4 1807.45   2
   1  -7  26 19557.0 1786.56   2
  -1   7 -26 16744.5 1225.59   1
  -7   6  23 45207.8 2595.07   2
   1  -7  23 42983.0 2444.12   2
  -1   7 -23 38001.1 1640.65   1
  -6  -1 -23 46399.1 2923.65   1
   1  -7  20 13993.5 973.826   1
  -6  -1 -20 19889.0 1883.22   1
  -1   7 -20 15321.0 909.116   1
   7  -6 -20 23453.5 1873.30   3
   1  -7  20 18872.5 1553.37   2
  -7   6  20 20899.7 1661.19   2
   1  -7  17 3503.20 412.059   1
   1  -7  17 4974.09 757.145   2
  -7   6  17 4664.54 805.593   2
   7  -6 -17 4959.45 862.082   3
  -1   7 -17 3970.08 385.530   1
   7  -6 -14 507.652 309.990   3
  -7   6  14 459.042 300.238   2
  -1   7 -14 449.617 105.538   1
   1  -7  14 370.558 105.654   1
   1  -7  14 492.689 238.371   3
  -6  -1 -11 7147.53 1015.47   1
   1  -7  11 6880.29 675.004   3
  -7   6  11 5006.93 619.439   2
  -1   7 -11 6651.16 635.046   3
   7  -6 -11 6517.88 812.490   3
  -7   6   8 12130.0 921.096   3
  -6  -1  -8 12106.8 1138.21   1
  -1   7  -8 12758.7 706.232   3
   7  -6  -8 12631.2 1012.34   3
   1  -7   8 12160.4 758.133   3
  -7   6   5 121844. 2612.28   3
   7  -6  -5 120274. 2807.48   3
  -1   7  -5 120583. 1441.12   1
  -1   7  -5 118193. 1776.62   3
  -6  -1  -5 116349. 3446.27   1
   1  -7   5 116060. 1978.42   3
   7  -6  -2 564167. 5687.37   3
   1  -7   2 584624. 4259.29   1
  -6  -1  -2 546457. 7281.68   1
  -7   6   2 595154. 5569.57   3
  -1   7  -2 561675. 4239.99   1
  -1   7  -2 584094. 3982.23   3
   6   1   2 573861. 6855.36   1
   1  -7  -1 612870. 5316.26   1
  -1   7   1 598637. 5227.99   1
   7  -6   1 577304. 5742.31   3
  -6  -1   1 589943. 7036.96   1
   6   1  -1 596857. 7774.94   3
  -1   7   4 461664. 5268.77   1
   1  -7  -4 466661. 5347.39   1
   6   1  -4 454382. 6550.43   3
  -6  -1   4 464979. 5833.78   1
  -6  -1   4 467067. 6096.37   3
   1  -7  -7 102105. 2804.77   1
  -7   6  -7 96870.7 3069.99   1
   6   1  -7 107455. 3162.74   3
   1  -7 -10 17968.8 1273.88   1
   6   1 -10 14155.9 1111.20   3
  -7   6 -10 15401.6 1353.63   1
  -6  -1  13 1288.77 292.056   1
   6   1 -13 635.073 388.671   3
   6   1 -16 1538.63 556.981   3
  -7   6 -16 618.469 263.706   1
   1  -7 -16 1459.57 459.768   1
   1  -7 -19 11733.2 1328.47   1
   6   1 -19 14819.2 1391.43   3
  -7   6 -19 15351.3 1484.56   1
  -7   6 -22 24660.2 1971.16   1
  -6  -1  22 17827.1 1622.25   2
   1  -7 -22 24404.2 2007.99   1
   6   1 -22 20643.3 1735.72   3
  -6  -1  25 30719.0 2284.96   2
   1  -7 -25 25263.7 2176.97   1
   6   1 -25 26389.1 2090.28   3
  -7   6 -25 30510.2 2343.25   1
  -7   6 -28 12498.1 1626.38   1
   1  -7 -28 13866.4 1721.80   1
  -6  -1  28 13209.6 1614.90   2
   1  -7 -31 4263.17 1131.68   1
  -7   6 -31 3520.26 1008.66   1
  -6  -1  31 3732.85 1028.07   2
  -7   6 -34 2702.36 984.401   1
  -6  -1  34 3273.60 1040.94   2
   1  -7 -34 3660.02 1103.86   1
  -6  -1  37 659.786 621.403   2
   1  -7 -37 1756.88 920.393   1
   1  -7 -40 1444.06 918.346   1
  -5  -2 -39 840.919 841.459   1
  -5  -2 -36 2559.93 1029.86   1
  -5  -2 -33 4779.30 1264.45   1
  -5  -2 -30 5968.00 1307.76   1
  -7   5  30 6591.00 1204.78   2
  -5  -2 -27 1049.04 648.691   1
   2  -7  27 539.863 441.203   2
  -7   5  27 926.666 594.776   2
  -2   7 -27 193.040 221.740   1
  -7   5  24 907.364 517.703   2
   2  -7  24-265.033 493.331   2
  -5  -2 -24 689.854 404.451   1
  -2   7 -24 480.884 207.197   1
   2  -7  21 9475.79 851.594   1
   7  -5 -21 12540.1 1383.35   3
  -5  -2 -21 12930.3 1481.13   1
   2  -7  21 13240.7 1271.19   2
  -2   7 -21 12050.6 891.410   1
  -7   5  21 12465.0 1331.99   2
  -2   7 -18 799.087 252.763   1
  -5  -2 -18 731.049 544.723   1
  -7   5  18 213.553 298.668   2
   2  -7  18 463.347 348.773   2
   7  -5 -18 1105.85 519.676   3
  -7   5  15 13837.4 1171.34   2
   2  -7  15 13186.5 785.314   1
   2  -7  15 13148.5 1093.14   2
  -2   7 -15 14198.7 730.744   1
   7  -5 -15 16572.0 1356.97   3
  -5  -2 -15 15790.0 1474.43   1
   2  -7  12 40749.2 1699.99   2
   7  -5 -12 42772.5 2028.41   3
  -2   7 -12 37711.2 983.545   1
   2  -7  12 42511.5 1675.95   3
  -5  -2 -12 42226.3 2221.78   1
   2  -7   9 17202.4 890.840   3
  -2   7  -9 14744.1 564.100   1
   7  -5  -9 16785.5 1197.89   3
  -5  -2  -9 16092.5 1294.09   1
  -2   7  -6 59467.3 1068.85   1
  -7   5   6 65775.2 2010.83   3
  -2   7  -6 67804.1 1266.27   3
  -5  -2  -6 66320.7 2478.96   1
   2  -7   6 63880.6 1310.69   3
   7  -5  -6 62058.9 2117.89   3
  -2   7  -3 188658. 2325.90   1
   7  -5  -3 187880. 3496.14   3
  -5  -2  -3 180781. 3875.25   1
   7  -5   0 258016. 4094.12   3
  -7   5   0 276186. 4113.04   3
   2  -7   0 268096. 3254.17   1
   5   2   0 250429. 4841.02   3
  -5  -2   0 250588. 4458.08   1
   5   2   0 272261. 4363.47   1
  -2   7   0 261789. 3271.43   1
   7  -5   3 122445. 2906.77   3
  -2   7   3 129736. 2636.98   1
  -5  -2   3 130246. 3114.13   3
   2  -7  -3 133954. 2699.79   1
  -5  -2   3 127452. 2939.55   1
   5   2  -3 135039. 3405.27   3
  -7   5  -6 98650.6 3079.88   1
  -5  -2   6 107683. 2815.14   3
  -2   7   6 104406. 2654.25   1
   5   2  -6 104130. 2972.75   3
   2  -7  -6 108740. 2741.84   1
   5   2  -9 21720.5 1378.86   3
  -7   5  -9 17698.3 1448.45   1
   2  -7  -9 22024.6 1358.85   1
  -5  -2  12 13446.1 821.926   1
   2  -7 -12 16523.5 1288.37   1
  -7   5 -12 15326.0 1376.37   1
   5   2 -12 14625.9 1176.68   3
   5   2 -15 24401.1 1625.39   3
  -7   5 -15 22315.8 1707.51   1
  -5  -2  15 21355.3 1158.97   1
   2  -7 -15 20532.9 1511.77   1
   5   2 -18 11686.7 1172.46   3
  -7   5 -18 13124.0 1369.70   1
   2  -7 -21 17534.6 1628.97   1
  -7   5 -21 21168.2 1808.40   1
   5   2 -21 18596.0 1595.38   3
  -7   5 -24 9262.95 1376.93   1
  -5  -2  24 7830.34 1170.10   2
   2  -7 -24 7534.55 1182.72   1
   5   2 -24 7686.97 1135.61   3
   2  -7 -27 8403.40 1301.13   1
  -5  -2  27 8106.85 1290.38   2
  -7   5 -27 7913.05 1309.01   1
  -5  -2  30 4008.74 1032.53   2
   2  -7 -30 2371.18 894.421   1
  -7   5 -30 2409.57 868.371   1
   2  -7 -33 1643.87 864.046   1
  -7   5 -33 1484.04 794.229   1
  -5  -2  33 1793.85 816.069   2
  -5  -2  36 1980.50 867.570   2
   2  -7 -36 1455.10 833.647   1
  -7   5 -36 1866.16 850.595   1
   2  -7 -39 783.991 739.337   1
  -5  -2  39 2020.74 861.421   2
  -4  -3 -40-748.372 709.613   1
  -4  -3 -37-172.853 619.851   1
  -4  -3 -34 3312.95 1057.15   1
  -4  -3 -31 5179.11 1202.12   1
  -7   4  31 4922.46 1078.61   2
  -4  -3 -28-1408.57 642.976   1
  -3   7 -28-486.226 521.904   1
  -7   4  28-277.034 426.922   2
  -3   7 -25 4857.30 737.600   1
  -7   4  25 5362.79 939.023   2
  -4  -3 -25 5650.96 1051.12   1
  -7   4  22 15522.7 1543.35   2
  -3   7 -22 15396.3 1153.46   1
   3  -7  22 15650.7 1400.22   2
  -4  -3 -22 16072.8 1646.41   1
   7  -4 -22 15518.3 1550.29   3
  -4  -3 -19 20517.2 1751.86   1
   7  -4 -19 21499.0 1715.12   3
   3  -7  19 17609.3 1178.53   1
   3  -7  19 21547.3 1531.79   2
  -3   7 -19 20131.4 1192.78   1
  -7   4  19 18479.1 1510.25   2
   7  -4 -16 26838.5 1745.03   3
  -4  -3 -16 27143.2 1892.57   1
   3  -7  16 27882.3 1573.94   2
  -3   7 -16 26118.4 1209.09   1
   3  -7  16 24864.5 1258.71   1
  -7   4  16 27503.1 1705.26   2
  -4  -3 -13 2971.43 606.560   1
   3  -7  13 2617.30 429.273   3
   7  -4 -13 2813.25 552.786   3
   3  -7  13 2818.06 440.266   2
   3  -7  13 3478.74 425.385   1
  -3   7 -13 2909.66 366.837   1
  -4  -3 -10 7094.85 827.091   1
  -3   7 -10 7509.23 553.563   1
   3  -7  10 7529.19 654.805   2
   7  -4 -10 6885.44 799.059   3
   3  -7  10 7451.43 620.484   3
  -3   7  -7 7062.38 515.518   1
   3  -7   7 7028.98 462.370   3
  -7   4   7 6833.56 680.614   3
  -4  -3  -7 6756.23 763.383   1
   7  -4  -7 4555.16 468.089   3
  -4  -3  -4 784.970 264.268   1
   7  -4  -4 930.325 299.831   3
   4   3   4 1057.51 278.487   1
  -7   4   4 876.196 241.944   3
   4   3   1 59303.7 1976.98   1
  -3   7  -1 52385.2 1426.22   1
  -7   4   1 57826.1 1928.82   3
  -4  -3  -1 50961.8 1794.78   1
   7  -4  -1 52378.2 1933.42   3
  -3   7   2 22276.8 1060.78   1
  -4  -3   2 21414.6 1120.04   1
   4   3  -2 24086.8 1174.59   1
   4   3  -2 22918.1 1374.31   3
   7  -4   2 22041.3 1301.12   3
  -3   7   2 23209.9 751.325   3
  -3   7   5 22339.9 986.792   3
  -3   7   5 22825.3 1198.58   1
   4   3  -5 22459.7 1292.42   3
  -4  -3   5 23267.9 1092.59   1
  -4  -3   5 22875.3 1256.60   3
  -7   4  -5 20641.2 1426.24   1
   3  -7  -5 23225.8 1237.69   1
  -4  -3   8 30915.2 1491.02   3
   3  -7  -8 30988.3 1543.47   1
  -3   7   8 30819.0 1381.07   3
   3  -7  -8 29303.4 1375.11   2
   4   3  -8 31665.1 1543.51   3
  -7   4  -8 29196.4 1825.43   1
   4   3 -11 5503.67 694.629   3
  -4  -3  11 4998.98 438.763   1
   3  -7 -11 5552.38 686.529   2
  -7   4 -11 5599.71 817.530   1
   3  -7 -11 4777.64 648.042   1
   4   3 -14 588.127 382.012   3
  -7   4 -14-101.785 444.613   1
  -4  -3  14 378.001 172.357   1
  -4  -3  17 114.860 132.396   1
   4   3 -17 214.301 284.824   3
  -7   4 -20-464.648 438.328   1
  -4  -3  20-179.759 212.854   1
   4   3 -20-758.153 490.975   3
  -4  -3  23 1350.66 573.493   2
  -7   4 -23 846.352 540.146   1
   4   3 -23 887.521 472.854   3
  -7   4 -26 994.208 662.098   1
   3  -7 -26 398.915 528.848   1
   3  -7 -29-1039.93 735.258   1
  -4  -3  29 722.538 591.472   2
  -7   4 -29 646.339 570.433   1
  -7   4 -32 2115.41 912.600   1
   3  -7 -32 52.5395 440.571   1
  -4  -3  32 2672.52 893.203   2
   3  -7 -35-127.779 467.170   1
  -4  -3  35 543.183 596.166   2
  -7   4 -35 673.249 648.112   1
   3  -7 -38 14.7235 472.537   1
  -4  -3  38 1105.67 661.263   2
  -7   4 -38 935.476 713.037   1
   3  -7 -41-182.360 575.003   1
  -3  -4 -41-1811.00 926.086   1
  -3  -4 -38-1990.22 911.881   1
  -7   3  35-10.9787 360.275   2
  -3  -4 -32 1181.84 700.767   1
  -7   3  32 539.550 502.351   2
  -4   7 -29 744.349 412.608   1
  -7   3  29 505.367 410.215   2
  -3  -4 -29 476.474 505.791   1
  -7   3  26 125.753 361.483   2
  -3  -4 -26-316.476 439.317   1
  -4   7 -26 178.497 217.593   1
   7  -3 -23 5923.36 1019.26   3
  -3  -4 -23 6498.18 1090.81   1
  -7   3  23 4923.28 927.400   2
  -4   7 -23 4687.93 754.582   1
  -4   7 -20 8961.73 929.092   1
   7  -3 -20 9559.84 1200.87   3
  -7   3  20 9378.01 1146.78   2
  -3  -4 -20 10513.4 1305.71   1
  -4   7 -17 21094.8 1283.77   1
   4  -7  17 23864.1 1486.56   2
  -7   3  17 21917.8 1588.73   2
  -3  -4 -17 22407.8 1730.19   1
   4  -7  17 20112.8 1267.37   1
   7  -3 -17 24327.0 1709.16   3
   4  -7  14 87574.5 2623.47   2
  -4   7 -14 85295.0 2375.38   1
   7  -3 -14 91890.9 3155.17   3
   4  -7  14 83209.9 2571.29   3
  -3  -4 -14 91377.5 3245.72   1
   4  -7  14 91361.4 2496.42   1
  -3  -4 -11 45105.2 2120.38   1
   7  -3 -11 49420.8 2151.59   3
  -4   7 -11 43181.5 1622.87   1
   4  -7  11 48262.8 1701.01   2
   4  -7  11 45586.8 1630.90   3
   4  -7   8 33115.0 1121.63   3
   4  -7   8 31957.0 1176.03   2
  -3  -4  -8 31793.2 1646.14   1
   7  -3  -8 31599.2 1661.23   3
  -4   7  -8 31105.0 1298.72   1
  -7   3   5 158895. 3244.00   3
   4  -7   5 154067. 1653.97   3
   7  -3  -5 154450. 3548.71   3
  -3  -4  -5 154848. 3283.73   1
   4  -7   5 155862. 2006.39   2
  -7   3   2 7709.62 719.845   3
   7  -3  -2 7039.04 753.016   3
   3   4   2 7340.29 671.187   1
  -3  -4  -2 6902.24 631.865   1
   3   4  -1 44201.1 1525.50   1
  -4   7   1 40201.1 852.752   3
   3   4  -1 41511.8 1770.84   3
  -4   7   1 41744.6 1435.49   1
  -3  -4   1 41831.3 1411.18   1
   7  -3   1 43023.2 1891.68   3
  -3  -4   4 167638. 3273.63   3
  -7   3  -4 167907. 4038.96   1
   4  -7  -4 168210. 2229.43   2
  -4   7   4 167588. 2472.04   3
  -3  -4   4 162157. 2543.92   1
  -4   7   4 173262. 3229.66   1
  -7   3  -7 123701. 3767.79   1
   3   4  -7 126727. 2896.13   3
  -3  -4   7 131601. 2119.55   1
   4  -7  -7 127640. 2535.71   2
  -3  -4   7 129866. 2900.18   3
   4  -7  -7 136181. 3100.34   1
  -4   7   7 130819. 2673.94   3
  -7   3 -10 50605.7 2458.05   1
  -3  -4  10 48624.1 1130.99   1
  -3  -4  10 51037.8 1966.37   3
  -4   7  10 52935.8 1993.33   3
   4  -7 -10 51292.0 1899.50   2
   4  -7 -10 54598.1 2171.18   1
   3   4 -10 50873.1 1937.05   3
   3   4 -13 190694. 3989.94   3
  -3  -4  13 189330. 2616.04   1
   4  -7 -13 199627. 4444.05   1
  -7   3 -13 194722. 5011.29   1
  -3  -4  16 86817.2 2074.70   1
  -7   3 -16 91675.1 3602.40   1
   3   4 -16 83209.7 2836.69   3
   4  -7 -16 91453.1 3203.79   1
  -3  -4  19 16744.7 1044.43   1
   3   4 -19 15997.4 1362.55   3
  -7   3 -19 19465.4 1727.79   1
   4  -7 -19 15461.6 1448.59   1
  -3  -4  22 18476.2 1634.97   2
   3   4 -22 20660.7 1667.98   3
   4  -7 -22 16131.9 1599.28   1
   4  -7 -25 11325.3 1442.05   1
  -3  -4  25 12413.3 1462.23   2
  -7   3 -25 13154.2 1660.96   1
   4  -7 -28 2287.69 816.424   1
  -3  -4  28 4654.43 1020.83   2
  -7   3 -28 4148.89 1084.54   1
  -3  -4  31 3564.81 1033.88   2
   4  -7 -31 931.820 693.966   1
  -7   3 -31 3543.05 1080.84   1
   4  -7 -34 454.675 588.163   1
  -3  -4  34 1882.80 849.226   2
  -7   3 -34 1145.14 778.174   1
  -3  -4  37 710.505 601.057   2
   4  -7 -37 275.679 544.990   1
  -7   3 -37 1259.13 813.642   1
   4  -7 -40 566.977 665.737   1
  -7   3 -40 742.141 751.210   1
  -2  -5 -39-926.360 677.924   1
  -2  -5 -36-1692.83 834.695   1
  -7   2  36 136.763 454.641   2
  -2  -5 -33-782.126 632.167   1
  -7   2  33 379.676 500.348   2
  -2  -5 -30 819.137 541.548   1
  -5   7 -30 1045.50 473.832   1
  -7   2  30 243.526 366.758   2
  -7   2  27 1588.51 627.712   2
  -2  -5 -27 1608.72 676.001   1
  -5   7 -27 1433.85 510.387   1
  -2  -5 -24 259.373 348.565   1
  -7   2  24 45.5025 416.799   2
  -5   7 -24-85.9663 352.536   1
   7  -2 -21 909.160 513.199   3
  -5   7 -21 1982.21 370.060   1
  -7   2  21 2191.72 542.718   2
  -2  -5 -21 2222.28 600.000   1
  -2  -5 -18 193.697 361.116   1
   7  -2 -18-590.183 531.526   3
  -5   7 -18 44.5495 236.567   1
   5  -7  15 13393.0 1060.34   1
   7  -2 -15 15268.6 1342.93   3
  -5   7 -15 13807.5 1099.93   1
  -2  -5 -15 12365.3 1156.96   1
  -5   7 -12 17724.4 1200.74   1
   7  -2 -12 19555.1 1422.65   3
   7  -2  -9 88791.0 2899.84   3
  -5   7  -9 81697.0 2474.68   1
  -2  -5  -9 91320.7 2794.19   1
   7  -2  -6 202636. 4238.36   3
  -2  -5  -6 203209. 3785.53   1
   5  -7   3 71094.4 1235.68   3
   7  -2  -3 76603.7 2575.20   3
   2   5   3 79192.0 2180.82   1
  -2  -5  -3 76604.0 2101.10   1
  -7   2   3 83583.8 2448.97   3
   2   5   0 51520.2 1568.58   1
   7  -2   0 50708.5 2165.01   3
   5  -7   0 51263.2 1064.03   3
  -2  -5   0 48274.4 1492.55   1
  -5   7   0 54090.6 1143.27   3
   2   5   0 46575.7 1816.67   3
  -7   2   0 51176.1 2083.62   1
   5  -7  -3 34740.4 1122.47   3
  -5   7   3 30538.5 1010.66   3
  -2  -5   3 29460.0 1329.73   3
   2   5  -3 34195.8 1416.90   3
  -2  -5   3 32044.1 978.552   1
   2   5  -3 32449.0 1116.91   1
  -7   2  -3 34286.8 1826.32   1
  -5   7   3 30607.2 1346.04   1
  -2  -5   6 25140.1 1219.40   3
   2   5  -6 25419.5 1198.58   3
  -5   7   6 25484.2 1137.22   3
  -2  -5   6 23804.1 686.072   1
   5  -7  -6 26766.4 1207.50   3
  -7   2  -6 25344.5 1704.22   1
  -7   2  -9 26035.0 1773.61   1
  -5   7   9 27688.5 1379.83   3
   2   5  -9 25820.9 1268.02   3
   5  -7  -9 29313.0 1467.46   3
  -2  -5   9 27050.1 1349.38   3
  -2  -5  12 69103.1 1229.14   1
   5  -7 -12 72316.9 2624.48   1
   2   5 -12 70356.4 2289.43   3
  -7   2 -12 67964.8 2945.24   1
   5  -7 -15 103768. 3402.59   1
   2   5 -15 98108.4 2913.58   3
  -2  -5  15 102926. 1923.87   1
  -7   2 -15 107831. 3892.43   1
  -2  -5  18 38918.1 1399.35   1
   5  -7 -18 40939.7 2267.15   1
  -7   2 -18 41298.4 2496.10   1
   2   5 -18 40912.7 2054.08   3
   2   5 -21 27543.5 1839.88   3
  -2  -5  21 32041.4 2086.48   2
   5  -7 -21 29695.8 2057.44   1
  -7   2 -21 34546.4 2429.29   1
  -2  -5  21 25408.9 1310.80   1
  -7   2 -24 15246.3 1739.07   1
  -2  -5  24 14571.7 1532.45   2
   5  -7 -24 11663.6 1375.51   1
  -2  -5  27 1167.79 589.515   2
   5  -7 -27 631.376 499.261   1
  -7   2 -27 1075.30 648.120   1
  -7   2 -30 2041.34 869.264   1
  -2  -5  30 1497.06 624.664   2
   5  -7 -30 1715.29 752.935   1
  -2  -5  33 654.925 591.882   2
   5  -7 -33 1641.91 747.350   1
  -7   2 -33 1838.90 780.063   1
  -2  -5  36 604.994 537.499   2
   5  -7 -36 652.796 536.433   1
  -7   2 -36-661.316 689.552   1
  -7   2 -39 7.80930 488.028   1
  -7   2 -42 3.23491 521.352   1
  -1  -6 -40 348.976 582.795   1
  -1  -6 -37-337.544 539.574   1
  -7   1  37 182.401 376.765   2
  -7   1  34-134.095 481.874   2
  -1  -6 -34 159.535 541.965   1
  -1  -6 -31-268.891 523.389   1
  -7   1  31 4.81686 385.770   2
  -6   7 -31-327.404 494.559   1
  -7   1  28 174.353 382.665   2
  -6   7 -28-256.512 400.820   1
  -1  -6 -25 1645.29 726.779   1
   7  -1 -25 909.990 536.367   3
  -7   1  25 539.798 498.672   2
  -6   7 -25 584.631 427.704   1
  -1  -6 -22 100.713 360.377   1
  -6   7 -22-835.863 683.405   1
  -7   1  22-899.736 653.977   2
   7  -1 -22 567.287 397.911   3
  -1  -6 -19-112.445 372.022   1
  -6   7 -19 107.661 234.026   1
   7  -1 -16 1441.84 475.292   3
  -1  -6 -16 1820.53 449.319   1
  -6   7 -16 1229.89 328.584   1
  -6   7 -13 9664.42 1016.77   1
   7  -1 -13 9040.03 1005.47   3
   6  -7  13 9886.01 918.365   1
  -1  -6 -13 8331.37 932.539   1
   7  -1 -10-195.556 386.615   3
  -6   7 -10-6.67673 155.958   2
  -1  -6 -10 10.1979 203.555   1
   7  -1  -7 1109.46 373.587   3
  -6   7  -7 1151.04 232.875   2
  -6   7  -7 713.615 252.146   1
  -1  -6  -7 990.979 285.140   1
  -1  -6  -4 37622.7 1509.14   1
   6  -7   4 35686.4 1176.41   3
   7  -1  -4 37267.0 1889.19   3
  -6   7  -4 36774.2 956.406   2
   1   6   4 39005.6 1567.32   1
  -7   1   1 6988.20 763.303   3
  -1  -6  -1 6891.71 571.641   1
   7  -1  -1 6644.22 826.177   3
   6  -7   1 7115.49 483.252   3
   1   6   1 7050.31 588.465   1
  -7   1   1 5916.22 705.926   1
  -6   7   2 4212.46 267.152   2
  -6   7   2 4012.07 386.288   3
  -1  -6   2 4087.57 367.442   1
  -7   1  -2 4113.23 663.589   1
   7  -1   2 4321.32 690.756   3
   1   6  -2 4526.68 494.028   3
   6  -7  -2 4218.93 413.067   3
   1   6  -2 4011.90 381.155   1
  -1  -6   5 4029.09 470.112   3
  -6   7   5 4349.56 459.565   3
   1   6  -5 4378.41 464.345   3
  -1  -6   5 4048.36 253.296   1
   1   6  -5 3747.84 293.265   1
  -7   1  -5 3610.92 670.442   1
   6  -7  -5 3793.48 458.220   3
  -6   7   5 4218.11 394.670   2
   6  -7  -8 294.755 207.315   3
  -1  -6   8 106.576 100.117   3
  -6   7   8 199.052 151.291   3
  -6   7   8 106.330 115.681   2
   1   6  -8 218.411 138.597   3
  -7   1  -8 116.090 232.964   1
  -1  -6  11 560.600 206.876   3
   1   6 -11 627.829 201.711   3
  -6   7  11 69.6791 293.080   2
   6  -7 -11 695.901 269.565   3
  -6   7  14 1907.51 438.591   2
  -7   1 -14 1194.80 354.586   1
   1   6 -14 1620.65 352.254   3
  -1  -6  14 1788.92 201.184   1
   6  -7 -14 2595.48 554.076   3
   1   6 -17 14698.9 1174.56   3
  -1  -6  17 14078.9 740.239   1
  -6   7  17 15633.8 1296.89   2
  -7   1 -17 16901.2 1595.35   1
  -1  -6  20 9162.51 1071.62   2
  -7   1 -20 9993.74 1301.12   1
  -1  -6  20 8454.31 685.707   1
   6  -7 -23 3580.37 770.608   1
  -1  -6  23 4992.81 867.722   2
  -7   1 -23 5893.75 1088.35   1
   6  -7 -26-63.9400 395.664   1
  -1  -6  26-49.2402 363.251   2
  -7   1 -29 1211.60 679.964   1
  -1  -6  29 1886.80 714.331   2
  -7   1 -32 1449.86 730.307   1
  -1  -6  32 519.846 472.115   2
  -1  -6  35 99.0979 372.165   2
  -7   1 -38 139.280 576.499   1
  -7   1 -41 478.962 744.680   1
   0  -7 -38 346.578 507.859   1
  -7   0  38-344.724 498.850   2
   0  -7 -35 627.645 644.830   1
  -7   0  35-610.150 525.043   2
   0  -7 -32 2100.42 861.316   1
  -7   7 -32 1486.42 652.457   1
  -7   0  32 498.797 561.080   2
  -7   0  29 484.647 481.662   2
  -7   7 -29 1743.86 663.006   1
   0  -7 -29 1590.46 738.039   1
   7   0 -26 8696.36 1278.99   3
  -7   0  26 7028.84 1156.41   2
   0  -7 -26 7428.92 1263.46   1
  -7   7 -26 7057.17 1138.52   1
  -7   7 -23 660.581 467.089   1
   0  -7 -23 1157.70 692.101   1
  -7   0  23-450.003 507.567   2
   7   0 -23 126.078 320.230   3
   0  -7 -20 6061.03 997.488   1
   7   0 -20 4304.43 804.882   3
  -7   7 -20 4400.18 749.067   1
   0  -7 -17 1509.16 429.804   1
  -7   7 -17 2153.41 522.049   1
   7   0 -17 1958.53 488.417   3
   7   0 -14 20006.4 1539.61   3
   0  -7 -14 19693.3 1526.89   1
  -7   7 -14 20612.2 1571.58   1
  -7   7 -11 610.800 304.748   1
  -7   7 -11 751.467 251.653   2
   0  -7 -11 559.962 320.721   1
  -7   7  -8 36082.5 1481.01   2
  -7   7  -8 34543.2 1842.56   1
   7   0  -8 39184.3 2020.57   3
   0  -7  -8 40616.2 1819.55   1
   0   7   5 80378.2 2360.51   1
   7   0  -5 73657.9 2789.09   3
   0  -7  -5 75775.5 2301.18   1
   7  -7   2 138671. 2638.15   3
   0   7   2 149770. 2872.25   1
   0  -7  -2 147610. 2810.37   1
   7   0  -2 142378. 3921.59   3
  -7   0   2 148796. 3660.88   1
   7   0   1 66703.9 2764.57   3
   0   7  -1 72485.9 1709.01   1
  -7   7   1 73864.3 1884.34   3
   0  -7   1 71347.6 1660.23   1
   0   7  -1 66879.9 1833.65   3
  -7   0  -1 68581.8 2669.58   1
   7  -7  -1 68414.8 1834.87   3
   0   7  -4 28881.9 1052.93   3
   0  -7   4 29046.5 793.394   1
  -7   0  -4 26434.4 1769.65   1
   0   7  -4 27480.8 844.634   1
  -7   7   4 27908.1 1203.92   3
   7  -7  -4 27529.3 1267.91   3
  -7   7   7 404.108 179.220   3
   0  -7   7 435.116 161.315   3
  -7   7   7 475.442 168.592   2
   0   7  -7 332.265 120.204   3
  -7   0  -7 139.266 244.327   1
   7  -7  -7 360.671 202.404   3
   0   7 -10 2396.68 376.140   3
   7  -7 -10 2763.91 509.479   3
  -7   0 -10 1018.05 440.057   1
   0  -7  10 2291.18 376.503   3
  -7   7  10 2397.31 422.279   2
   0   7 -13 3540.32 499.117   3
   7  -7 -13 3833.31 643.865   3
  -7   7  13 3474.78 559.004   2
  -7   0 -13 3103.78 680.710   1
   0  -7  13 3495.36 534.591   3
   0   7 -16 2305.93 463.810   3
   7  -7 -16 2128.54 503.996   3
   0  -7  16 1970.65 242.243   1
  -7   7  16 2130.41 483.044   2
  -7   0 -16 3554.91 781.666   1
  -7   7  19 1218.45 431.668   2
   0  -7  19 1126.27 248.552   1
   0  -7  19 950.394 395.346   2
  -7   7  22 1472.50 475.274   2
   0  -7  22 1973.58 579.822   2
   0  -7  22 1735.41 357.770   1
  -7   0 -25 1173.47 638.218   1
   0  -7  25 905.362 488.010   2
   0  -7  28 783.015 486.129   2
  -7   0 -28-52.7935 433.114   1
   0  -7  31 581.965 516.194   2
  -7   0 -31 954.454 636.117   1
  -7   0 -34-929.780 700.228   1
   0  -7  34 1029.09 624.094   2
  -7   0 -37 798.221 819.632   1
  -7   0 -40 1209.35 959.987   1
  -7  -1 -39 354.972 609.005   1
  -7  -1 -36-136.849 527.624   1
   1  -8  33 121.240 373.431   2
  -7  -1 -33 93.6227 425.626   1
   1  -8  30 805.219 539.939   2
  -7  -1 -30-4.95713 475.226   1
   1  -8  27 398.018 388.622   2
  -8   7  27-386.863 470.620   2
  -7  -1 -27 548.750 586.297   1
  -1   8 -24-242.080 247.710   1
  -8   7  24-152.115 385.979   2
  -1   8 -21 4571.35 438.517   1
  -8   7  21 5695.89 920.261   2
   1  -8  21 4667.00 529.955   1
   1  -8  21 6434.82 941.531   2
   8  -7 -21 3143.45 720.024   3
  -7  -1 -21 7541.00 1230.45   1
  -8   7  18 29394.1 1894.59   2
   1  -8  18 29100.5 1038.02   1
   8  -7 -18 32511.1 2091.17   3
   1  -8  18 32459.4 1909.92   2
  -1   8 -18 26156.9 830.198   1
  -7  -1 -18 34962.9 2404.64   1
  -7  -1 -15 22407.6 1824.02   1
   8  -7 -15 21425.3 1610.80   3
  -8   7  15 21387.0 1491.09   2
   8  -7 -12 33923.3 1851.39   3
   1  -8  12 34300.2 1560.90   3
  -7  -1 -12 34787.1 2229.10   1
  -1   8 -12 34612.3 1438.61   3
  -8   7  12 33721.8 1680.91   2
   1  -8   9 2815.10 386.906   3
  -1   8  -9 2941.14 367.736   3
   8  -7  -9 2565.37 475.747   3
  -7  -1  -9 2325.21 496.624   1
   1  -8   6 968.460 208.087   3
  -7  -1  -6 557.880 261.735   1
  -1   8  -6 898.361 129.432   1
  -1   8  -6 832.861 175.563   3
  -8   7   6 1003.16 261.085   3
   8  -7  -6 833.896 262.204   3
  -1   8  -3 6623.33 452.567   3
  -8   7   3 6723.09 634.700   3
  -7  -1  -3 6299.30 877.354   1
  -1   8  -3 7742.16 507.485   1
   8  -7  -3 6164.55 642.890   3
   1  -8   0 41737.0 1419.26   1
  -8   7   0 41623.5 1607.83   3
  -7  -1   0 38496.9 2014.10   1
   8  -7   0 38521.6 1570.96   3
   7   1   0 38163.8 2155.96   3
   8  -7   3 1296.54 309.288   3
   1  -8  -3 1329.80 310.193   1
  -7  -1   3 1851.54 439.832   1
   7   1  -3 1642.55 489.441   3
  -8   7  -6 47150.8 2164.34   1
   1  -8  -6 52544.3 2038.59   1
   7   1  -6 52117.3 2393.03   3
  -8   7  -9 10994.6 1128.22   1
   7   1  -9 11003.2 1138.06   3
   1  -8  -9 11709.8 1047.51   1
  -8   7 -12 43307.8 2424.54   1
   7   1 -12 47529.8 2339.78   3
   1  -8 -12 46375.4 2250.21   1
   1  -8 -15 771.690 316.464   1
  -8   7 -15 1381.89 455.847   1
   7   1 -15 1494.84 468.161   3
   1  -8 -18 3690.43 720.536   1
  -8   7 -18 3785.97 761.760   1
   7   1 -18 4011.74 802.996   3
   1  -8 -21 5491.23 984.677   1
  -8   7 -21 7036.41 1117.37   1
   7   1 -21 5235.05 902.490   3
  -8   7 -24 639.839 546.411   1
   7   1 -24 246.949 416.813   3
   1  -8 -24 208.305 421.484   1
  -7  -1  24-712.121 699.090   2
   7   1 -27 1241.54 529.364   3
   1  -8 -27 213.313 489.752   1
  -7  -1  27 696.737 393.132   2
  -8   7 -27-476.031 717.283   1
  -8   7 -30-1299.66 871.127   1
   1  -8 -30 320.060 485.681   1
  -7  -1  30-140.227 461.555   2
  -8   7 -33-558.356 576.568   1
  -7  -1  33-1576.74 700.672   2
   1  -8 -33 76.1138 405.400   1
  -7  -1  36-1233.43 686.176   2
   1  -8 -36 230.334 422.847   1
   1  -8 -39 88.0816 479.253   1
  -6  -2 -40 325.466 616.697   1
  -6  -2 -37 814.112 715.221   1
  -6  -2 -34 362.396 598.553   1
  -6  -2 -31 513.758 629.575   1
  -8   6  28-255.100 537.912   2
   2  -8  28 1316.03 582.827   2
  -6  -2 -28 1431.02 743.157   1
  -6  -2 -25 1736.99 723.977   1
  -8   6  25 1021.60 478.443   2
   2  -8  25 1121.23 550.632   2
  -2   8 -25 747.790 275.924   1
  -2   8 -22 372.218 171.874   1
  -8   6  22 355.171 330.271   2
   2  -8  22 814.205 423.081   2
  -6  -2 -22 717.602 465.918   1
  -6  -2 -19 425.690 327.435   1
   8  -6 -19 598.177 365.713   3
  -8   6  19 110.925 367.678   2
   2  -8  19 681.022 206.185   1
   2  -8  19 359.335 330.721   2
  -2   8 -19 339.234 127.923   1
  -2   8 -16 4276.22 366.965   1
  -6  -2 -16 5081.49 893.694   1
  -8   6  16 4516.16 717.690   2
   2  -8  16 4702.09 673.583   2
   8  -6 -16 4339.62 745.105   3
   2  -8  13 4088.24 550.773   3
  -6  -2 -13 4638.65 818.310   1
   8  -6 -13 3718.90 613.661   3
   2  -8  13 3562.99 524.449   2
  -8   6  13 3863.37 583.030   2
  -2   8 -13 3695.45 269.387   1
   8  -6 -10 49639.8 2167.47   3
  -6  -2 -10 54607.7 2558.10   1
   2  -8  10 52925.8 1669.30   3
   2  -8   7 24463.2 909.909   3
   8  -6  -7 23241.2 1396.22   3
  -6  -2  -7 24886.5 1675.58   1
  -2   8  -7 26285.0 888.113   3
  -2   8  -7 23422.8 659.576   1
  -8   6   4 1682.69 330.606   3
  -6  -2  -4 1952.95 457.415   1
  -2   8  -4 1578.62 220.669   1
   8  -6  -4 1397.25 329.036   3
  -2   8  -4 1566.52 163.902   3
  -2   8  -1 236.827 83.5946   3
   6   2   1 76.2957 247.208   3
   8  -6  -1 386.437 180.314   3
  -6  -2  -1 289.673 182.658   1
  -2   8  -1 101.709 82.4265   1
   6   2   1 593.374 249.488   1
   6   2  -2 62824.1 2620.86   3
  -2   8   2 59565.3 1829.76   1
   8  -6   2 62143.5 2162.71   3
   2  -8  -2 64058.3 1897.57   1
  -6  -2   2 59919.8 2292.49   1
   2  -8  -5 39462.9 1693.05   1
  -2   8   5 37721.5 1627.06   1
   6   2  -5 33316.3 1841.14   3
  -6  -2   5 37994.9 1719.02   1
  -8   6  -5 35896.7 1880.45   1
   2  -8  -8 67838.2 2402.05   1
   6   2  -8 68272.0 2609.79   3
  -8   6  -8 60732.0 2680.78   1
   2  -8 -11 2345.19 517.190   1
   6   2 -11 1047.20 506.457   3
  -8   6 -11 2409.84 569.891   1
   2  -8 -14 20978.6 1555.90   1
  -6  -2  14 17594.2 1042.26   1
   6   2 -14 20122.6 1498.57   3
  -8   6 -14 20804.3 1715.88   1
   2  -8 -17 3634.33 679.029   1
   6   2 -17 3261.63 662.117   3
  -8   6 -17 3566.87 739.352   1
   2  -8 -20 10500.1 1263.80   1
  -8   6 -20 11460.8 1376.05   1
   6   2 -20 10070.5 1208.09   3
  -8   6 -23 1678.31 629.624   1
   6   2 -23 1081.68 489.213   3
  -6  -2  23-57.2293 555.717   2
   2  -8 -23 412.430 376.380   1
   2  -8 -26 182.337 433.652   1
   6   2 -26 818.577 498.287   3
  -6  -2  26-43.0084 380.146   2
  -8   6 -26 897.752 543.849   1
  -8   6 -29-26.1111 768.291   1
  -6  -2  29 917.030 579.065   2
   2  -8 -29 1005.87 578.416   1
   2  -8 -32 2302.07 833.191   1
  -8   6 -32 1312.45 646.621   1
  -6  -2  32 2025.94 796.904   2
  -6  -2  35 62.8282 338.399   2
  -8   6 -35 278.036 506.218   1
   2  -8 -35 441.532 584.278   1
  -6  -2  38-83.8444 422.577   2
   2  -8 -38 615.986 630.423   1
  -5  -3 -38-20.1210 535.454   1
  -5  -3 -35 650.750 612.470   1
  -5  -3 -32 523.359 570.705   1
  -8   5  32 129.947 370.119   2
  -5  -3 -29 196.660 611.470   1
  -8   5  29 663.198 547.699   2
  -3   8 -26-464.304 368.868   1
   3  -8  26-1546.29 565.074   2
  -8   5  26-293.389 378.989   2
  -5  -3 -26-224.839 480.385   1
  -8   5  23 356.346 420.147   2
   8  -5 -23 214.733 404.565   3
  -3   8 -23 208.954 212.740   1
   3  -8  23-312.005 417.121   2
  -5  -3 -23-228.015 465.129   1
   3  -8  20 8889.89 822.536   1
  -3   8 -20 9906.28 809.587   1
   3  -8  20 9298.22 1029.94   2
  -8   5  20 9624.56 1147.86   2
  -5  -3 -20 11157.4 1434.65   1
   8  -5 -20 9724.80 1203.88   3
  -5  -3 -17 2227.52 589.189   1
   3  -8  17 3092.35 431.495   1
  -8   5  17 2049.21 521.865   2
  -3   8 -17 2871.97 396.703   1
   3  -8  17 2403.80 498.998   2
   8  -5 -17 2612.73 612.340   3
   8  -5 -14 20989.4 1541.89   3
   3  -8  14 19746.5 1270.78   2
  -3   8 -14 20141.2 904.002   1
  -5  -3 -14 22189.8 1729.96   1
   3  -8  14 20692.1 1272.24   3
  -5  -3 -11 67991.5 2771.71   1
   3  -8  11 61926.5 1986.38   2
  -3   8 -11 61469.2 1504.88   1
   3  -8  11 63360.3 1899.33   3
   8  -5 -11 64628.6 2540.11   3
   3  -8   8 22234.2 894.084   3
  -3   8  -8 21588.3 911.385   1
   8  -5  -8 21818.4 1408.47   3
  -5  -3  -8 22521.5 1502.78   1
  -8   5   5 48947.8 1815.59   3
  -3   8  -5 43714.6 1147.60   1
  -5  -3  -5 46002.8 2064.96   1
   8  -5  -5 45651.0 1942.62   3
   8  -5  -2 80333.5 2525.67   3
  -5  -3  -2 76872.4 2499.67   1
  -8   5   2 88147.7 2456.47   3
  -3   8  -2 77240.6 1789.67   1
   5   3   2 88000.8 2663.59   1
   5   3  -1 15863.5 1065.22   1
   8  -5   1 15405.4 1128.20   3
  -3   8   1 15139.5 556.725   3
   5   3  -1 14453.1 1229.47   3
  -5  -3   1 14120.6 1031.48   1
  -3   8   1 14852.6 881.814   1
   5   3  -4 32891.8 1748.17   3
  -8   5  -4 32343.7 1781.70   1
  -5  -3   4 32668.9 1518.52   1
  -5  -3   4 33077.5 1656.32   3
  -3   8   4 33660.6 1469.60   1
   3  -8  -4 34463.4 1496.21   1
  -3   8   4 33496.2 1156.02   3
  -8   5  -7 6322.09 882.921   1
   3  -8  -7 6505.86 726.087   1
  -5  -3   7 7173.57 673.575   1
   5   3  -7 7217.60 825.646   3
  -3   8   7 6468.62 619.013   3
   5   3 -10 5147.82 703.182   3
   3  -8 -10 4763.72 634.934   2
   3  -8 -10 5617.81 686.182   1
  -8   5 -10 4559.33 794.265   1
  -8   5 -13 616.134 342.130   1
  -5  -3  13 64.8618 104.389   1
   5   3 -13-177.716 322.599   3
   3  -8 -13-316.438 497.512   1
  -5  -3  16 16648.7 1005.78   1
   5   3 -16 17744.2 1427.12   3
  -8   5 -16 17344.4 1650.98   1
   3  -8 -16 19751.0 1564.51   1
   5   3 -19 8959.03 1080.25   3
  -5  -3  19 10083.1 874.577   1
  -8   5 -19 12440.7 1426.63   1
   3  -8 -19 12979.3 1371.42   1
   3  -8 -22 19882.0 1816.73   1
  -8   5 -22 20025.0 1907.70   1
   5   3 -22 17707.2 1592.31   3
   3  -8 -25 3609.59 852.358   1
   5   3 -25 4211.59 874.440   3
  -5  -3  25 6322.63 1124.35   2
  -8   5 -25 4672.59 1061.51   1
   3  -8 -28-163.378 434.847   1
  -8   5 -28 255.469 445.177   1
  -5  -3  28-322.999 434.025   2
   3  -8 -31-48.5848 492.655   1
  -8   5 -31 159.775 391.008   1
  -5  -3  31 438.945 455.472   2
  -5  -3  34 491.399 546.968   2
  -8   5 -34 1064.36 641.530   1
   3  -8 -34 180.829 485.081   1
  -5  -3  37 179.094 419.202   2
   3  -8 -37 278.830 578.899   1
  -8   5 -37 398.809 558.875   1
   3  -8 -40 254.274 556.716   1
  -4  -4 -39-997.771 751.070   1
  -4  -4 -36-1426.51 800.414   1
  -4  -4 -33-4.79031 457.736   1
  -8   4  33 357.728 409.227   2
  -8   4  30 902.369 520.301   2
  -4  -4 -30 942.465 643.147   1
  -8   4  27 202.557 381.277   2
  -4   8 -27 19.3622 201.922   1
  -4  -4 -24-133.470 522.555   1
   8  -4 -24 683.307 447.370   3
  -8   4  24 53.9789 284.677   2
  -4   8 -24 484.869 259.900   1
  -4   8 -21 4852.60 672.060   1
   4  -8  21 3633.81 674.908   2
  -8   4  21 4584.28 854.119   2
   8  -4 -21 4636.21 940.796   3
  -4  -4 -21 5325.68 997.164   1
  -4  -4 -18 53629.6 2856.06   1
   4  -8  18 53043.7 2339.02   2
   8  -4 -18 50248.0 2597.62   3
  -4   8 -18 51263.0 1980.53   1
   4  -8  18 51970.9 2009.95   1
  -8   4  18 49157.0 2497.69   2
   4  -8  15 76515.5 2511.97   2
  -4   8 -15 72720.6 2157.63   1
  -4  -4 -15 78586.1 3175.61   1
   8  -4 -15 75456.9 3001.94   3
   4  -8  15 69547.8 2421.15   3
  -4   8 -12 105799. 2471.78   1
  -4  -4 -12 118271. 3665.49   1
   4  -8  12 107301. 2604.63   3
   4  -8  12 109375. 2689.71   2
   8  -4 -12 115186. 3497.31   3
  -4  -4  -9 77704.0 2760.79   1
  -4   8  -9 72521.1 2009.32   1
   4  -8   9 74547.6 1928.47   2
   8  -4  -9 78822.5 2737.86   3
   4  -8   9 77437.6 1786.00   3
   8  -4  -6 10036.1 952.019   3
   4  -8   6 9985.09 578.550   2
  -4  -4  -6 10038.0 930.223   1
   4  -8   6 9451.65 429.461   3
   4   4   3 7134.41 748.001   1
  -4  -4  -3 7713.76 752.863   1
   8  -4  -3 7049.43 798.180   3
  -8   4   3 7385.56 732.510   3
  -4   8   0 4385.91 474.825   1
  -4  -4   0 4090.12 514.796   1
   4   4   0 4149.75 633.727   3
   4   4   0 4413.52 558.915   1
  -8   4  -3 24372.7 1579.31   1
   8  -4   3 23677.8 1499.14   3
  -4   8   3 24822.9 878.411   3
   4   4  -3 27793.6 1260.84   1
   4   4  -3 26434.1 1513.60   3
  -4  -4   3 24483.4 1378.50   3
  -4   8   3 25381.8 1266.47   1
  -4  -4   3 24735.1 1186.31   1
   4  -8  -6 124224. 3006.44   1
  -4  -4   6 115358. 2447.84   1
  -8   4  -6 114206. 3694.44   1
  -4  -4   6 123645. 3089.30   3
  -4   8   6 120105. 2453.55   3
   4  -8  -6 114564. 2335.43   2
   4   4  -6 124337. 3179.64   3
  -8   4  -9 95938.3 3613.71   1
   4  -8  -9 101527. 2602.63   2
  -4   8   9 107566. 2743.30   3
  -4  -4   9 112920. 2273.62   1
   4   4  -9 107363. 2999.10   3
   4  -8  -9 105570. 3056.62   1
  -8   4 -12 49618.1 2658.76   1
   4  -8 -12 50292.1 2245.66   1
  -4  -4  12 46256.7 1304.47   1
   4   4 -12 46531.6 2056.94   3
   4   4 -15 111295. 3379.03   3
  -8   4 -15 119724. 4256.18   1
  -4  -4  15 114578. 2311.53   1
   4  -8 -15 121518. 3746.70   1
   4  -8 -18 45294.0 2449.20   1
  -8   4 -18 47153.9 2761.12   1
   4   4 -18 39222.5 2115.34   3
  -4  -4  18 40792.3 1573.72   1
   4   4 -21 3322.67 763.907   3
   4  -8 -21 3813.54 831.618   1
  -8   4 -21 5300.03 1061.11   1
  -4  -4  21 3703.66 539.586   1
   4   4 -24 8925.99 1212.68   3
  -4  -4  24 10969.0 1369.22   2
  -8   4 -24 12502.1 1614.60   1
   4  -8 -24 9577.78 1388.08   1
  -4  -4  27 3023.69 907.054   2
  -8   4 -27 2537.21 865.621   1
   4  -8 -27 1632.22 767.561   1
   4  -8 -30 162.785 514.613   1
  -8   4 -30 686.985 588.283   1
  -4  -4  30 1698.49 799.914   2
  -4  -4  33 539.852 536.366   2
  -8   4 -33 1206.25 761.602   1
   4  -8 -33 281.070 543.331   1
  -8   4 -36 176.173 522.209   1
  -4  -4  36 727.437 617.633   2
   4  -8 -36 3.21464 466.367   1
   4  -8 -39 557.506 635.458   1
  -8   4 -39 171.879 445.976   1
  -3  -5 -40-413.275 702.575   1
  -8   3  37-365.203 468.836   2
  -3  -5 -37-814.906 707.578   1
  -8   3  34 190.664 360.326   2
  -3  -5 -34-1969.05 854.923   1
  -8   3  31-643.308 481.514   2
  -3  -5 -31-95.5314 462.601   1
  -8   3  28 2865.68 789.085   2
  -3  -5 -28 2966.68 849.103   1
  -5   8 -28 3705.78 749.912   1
   8  -3 -25-153.481 434.955   3
  -8   3  25 156.664 323.816   2
  -3  -5 -25-322.821 519.171   1
  -5   8 -25 64.7053 217.061   1
  -3  -5 -22-605.545 619.386   1
  -8   3  22-138.367 398.156   2
  -5   8 -22-276.635 384.527   1
   8  -3 -22-160.192 407.793   3
   8  -3 -19 6901.99 1010.53   3
  -3  -5 -19 6393.12 987.816   1
  -5   8 -19 6558.56 817.161   1
  -8   3  19 4867.64 803.933   2
   8  -3 -16 109443. 3703.93   3
  -5   8 -16 102477. 2918.85   1
  -3  -5 -16 107772. 3747.88   1
   5  -8  16 111652. 3006.23   1
  -5   8 -13 161543. 3545.12   1
   8  -3 -13 167547. 4366.79   3
  -3  -5 -13 170170. 4441.53   1
  -5   8 -10 139827. 3299.65   1
   5  -8  10 140144. 2625.56   3
  -5   8  -7 117321. 2673.13   1
   8  -3  -7 121074. 3437.45   3
  -3  -5  -7 124497. 3234.76   1
   8  -3  -4 26535.7 1610.96   3
   3   5   4 30500.4 1494.04   1
  -3  -5  -4 28223.0 1415.26   1
  -8   3   1 23982.4 1408.23   3
  -3  -5  -1 22617.1 1140.42   1
   8  -3  -1 21941.4 1476.57   3
   3   5   1 24799.5 1255.80   1
  -5   8   2 367.060 146.919   1
   5  -8  -2 681.768 150.479   3
   3   5  -2 670.211 236.021   3
   8  -3   2 958.386 317.344   3
   3   5  -2 671.407 202.411   1
  -3  -5   2 637.750 181.825   1
  -5   8   2 665.649 136.940   3
  -8   3  -2 650.049 278.437   1
  -8   3  -5 46542.2 2340.82   1
   3   5  -5 48300.3 1885.10   3
  -3  -5   5 44603.4 1265.73   1
  -3  -5   5 47164.4 1834.89   3
   5  -8  -5 44812.8 1217.15   2
  -5   8   5 45231.1 1409.74   3
  -3  -5   8 119971. 1995.90   1
  -5   8   8 132811. 2903.13   3
   5  -8  -8 124777. 2567.07   2
  -3  -5   8 124901. 3026.47   3
   3   5  -8 132519. 3124.58   3
  -8   3  -8 127873. 4130.37   1
  -3  -5  11 264788. 2520.05   1
   5  -8 -11 273459. 4497.64   2
   3   5 -11 281824. 4714.72   3
  -3  -5  11 283559. 3033.16   1
   5  -8 -11 283778. 5231.72   1
  -8   3 -11 262345. 6144.07   1
  -3  -5  14 139294. 2164.12   1
   3   5 -14 149068. 3653.85   3
  -8   3 -14 143149. 4696.64   1
   3   5 -17 97811.2 3176.23   3
  -3  -5  17 97737.8 2130.88   1
  -8   3 -17 104069. 4103.27   1
   5  -8 -17 106071. 3629.60   1
   5  -8 -20 8276.39 1125.91   1
  -3  -5  20 9464.73 776.030   1
   3   5 -20 10858.2 1168.26   3
   3   5 -23 2301.13 658.255   3
  -3  -5  23 3135.24 812.077   2
  -8   3 -23 4052.41 995.589   1
   5  -8 -23 2181.18 749.168   1
  -3  -5  26 1108.49 590.840   2
  -8   3 -26 1439.72 754.530   1
   5  -8 -26 305.877 416.982   1
  -8   3 -29 993.040 725.659   1
  -3  -5  29 616.978 551.145   2
   5  -8 -29 409.773 552.446   1
  -3  -5  32 35.2616 390.116   2
   5  -8 -32-81.0998 431.218   1
  -8   3 -32 532.793 575.787   1
   5  -8 -35 241.180 556.630   1
  -3  -5  35 886.241 656.798   2
  -8   3 -35-4.06308 489.840   1
   5  -8 -38 1411.63 826.167   1
  -3  -5  38 386.966 579.030   2
  -8   3 -38 553.101 701.023   1
  -8   3 -41 18.3663 484.322   1
  -2  -6 -38-579.168 608.301   1
  -8   2  38 24.0781 377.030   2
  -8   2  35 113.816 418.636   2
  -2  -6 -35-287.439 525.356   1
  -8   2  32-15.2179 373.779   2
  -2  -6 -32-738.252 600.111   1
  -2  -6 -29 57.4020 401.086   1
  -6   8 -29-350.281 413.207   1
  -2  -6 -26 481.262 600.079   1
   8  -2 -26 1230.52 603.758   3
  -8   2  26 2291.30 794.628   2
  -6   8 -26 659.128 491.574   1
  -2  -6 -23 7590.83 1193.12   1
   8  -2 -23 5336.04 948.920   3
  -8   2  23 6456.15 1045.64   2
  -6   8 -23 6803.08 994.960   1
   8  -2 -20 7168.93 1018.89   3
  -2  -6 -20 9173.37 1208.40   1
  -6   8 -20 7475.56 945.137   1
  -6   8 -17 37662.7 2021.93   1
  -2  -6 -17 36749.1 2237.35   1
   8  -2 -17 35991.4 2190.08   3
  -6   8 -14 34655.4 1859.38   1
  -2  -6 -14 34892.1 2036.19   1
   8  -2 -14 37013.7 2111.79   3
  -2  -6 -11 7336.84 855.932   1
   8  -2 -11 8767.76 993.529   3
  -6   8 -11 8278.20 895.295   1
   8  -2  -8 34600.0 1914.11   3
  -6   8  -8 31927.0 1602.08   1
  -2  -6  -8 30537.4 1649.82   1
   8  -2  -5 3372.98 601.124   3
   2   6   5 4424.82 569.863   1
  -2  -6  -5 3503.18 502.497   1
   2   6   2 4517.80 531.222   1
   8  -2  -2 4324.94 686.755   3
   6  -8   2 4158.58 323.396   3
  -2  -6  -2 4103.96 491.762   1
   2   6  -1 18002.8 961.468   1
   2   6  -1 17406.1 1153.27   3
  -6   8   1 17538.7 743.920   3
  -8   2  -1 17038.3 1351.70   1
   6  -8  -1 17545.3 744.075   3
  -2  -6   1 17288.4 877.368   1
   8  -2   1 18348.3 1430.35   3
  -8   2  -4 33091.3 1981.94   1
   6  -8  -4 32563.8 1231.91   3
   2   6  -4 30048.6 1094.42   1
  -2  -6   4 31215.0 977.407   1
  -2  -6   4 28453.1 1382.35   3
  -6   8   4 29814.7 1112.07   3
   2   6  -4 32216.1 1445.19   3
   2   6  -7 37095.9 1535.28   3
  -2  -6   7 39186.4 1614.44   3
  -8   2  -7 36668.7 2260.90   1
  -2  -6   7 34884.0 756.085   1
   6  -8  -7 39267.2 1610.33   3
  -6   8   7 37056.7 1467.39   3
   6  -8 -10 99031.0 2906.51   3
   2   6 -10 92532.9 2518.88   3
  -2  -6  10 94807.6 2695.75   3
  -8   2 -10 93906.6 3637.13   1
   2   6 -13 85801.3 2644.48   3
  -8   2 -13 93339.7 3793.80   1
  -2  -6  16 20145.3 774.396   1
   2   6 -16 21333.3 1425.81   3
   6  -8 -19 26169.3 1847.67   1
  -8   2 -19 30547.7 2291.46   1
  -2  -6  19 25532.7 1086.79   1
   2   6 -19 26324.7 1733.71   3
   6  -8 -22 712.703 570.894   1
   2   6 -22 2347.52 601.815   3
  -2  -6  22 2255.79 668.908   2
  -8   2 -22 2939.79 820.595   1
  -8   2 -25 140.431 364.686   1
  -2  -6  25 368.993 368.273   2
   6  -8 -25-691.289 619.446   1
  -2  -6  28-378.647 468.816   2
   6  -8 -28-445.170 541.189   1
  -8   2 -28-81.8685 469.233   1
  -8   2 -31-405.240 549.746   1
   6  -8 -31-215.337 511.894   1
  -2  -6  31-633.581 523.466   2
  -2  -6  34-686.425 543.496   2
  -8   2 -37-1074.54 822.784   1
  -2  -6  37 401.415 522.579   2
  -8   2 -40-365.237 620.567   1
  -1  -7 -39-429.552 591.716   1
  -8   1  36 383.226 559.056   2
  -1  -7 -36 714.995 690.607   1
  -8   1  33 2069.11 775.882   2
  -1  -7 -33 2300.99 886.970   1
  -1  -7 -30 1354.59 737.082   1
  -7   8 -30 947.954 479.950   1
  -8   1  30 525.666 465.164   2
  -7   8 -27 2803.11 828.121   1
  -1  -7 -27 3274.80 986.423   1
  -8   1  27 4405.61 1021.37   2
   8  -1 -27 3786.32 918.696   3
  -7   8 -24 22859.1 1932.37   1
  -1  -7 -24 23872.9 2167.87   1
   8  -1 -24 23387.8 2011.83   3
  -8   1  24 18567.5 1821.51   2
  -1  -7 -21 71590.4 3379.04   1
  -7   8 -21 68410.5 3066.46   1
   8  -1 -21 66111.2 3169.41   3
  -1  -7 -18 87689.9 3484.81   1
  -7   8 -18 83417.6 3292.86   1
   8  -1 -18 81410.4 3385.42   3
   8  -1 -15 34666.8 2108.96   3
  -1  -7 -15 39458.3 2204.80   1
  -7   8 -15 36279.4 2076.72   1
  -7   8 -12 13963.0 1272.77   1
   8  -1 -12 14729.1 1306.60   3
  -7   8 -12 14938.4 1120.35   2
  -1  -7 -12 13546.5 1232.91   1
  -7   8  -9 14566.4 941.310   2
  -1  -7  -9 14563.0 1158.06   1
  -7   8  -9 13214.9 1141.04   1
   8  -1  -9 15644.8 1334.79   3
  -1  -7  -6 19096.1 1218.68   1
  -7   8  -6 17890.4 834.409   2
   8  -1  -6 18497.9 1457.75   3
   8  -1  -3 7139.60 915.284   3
   1   7   3 6522.27 657.243   1
  -1  -7  -3 6521.62 643.540   1
   7  -8   3 6688.98 531.820   3
  -7   8  -3 5620.41 324.203   2
   8  -1   0 59606.9 2660.92   3
  -1  -7   0 59404.9 1692.05   1
  -8   1   0 56782.8 2471.74   1
   1   7   0 51432.7 1920.32   3
   7  -8   0 56808.3 1518.31   3
  -7   8   0 58283.8 1610.75   3
   1   7   0 58649.0 1749.75   1
  -7   8   3 182617. 2856.34   3
  -7   8   3 181831. 2084.75   2
  -1  -7   3 182741. 2442.02   1
   1   7  -3 185325. 2653.14   1
   7  -8  -3 179928. 2991.53   3
   1   7  -3 187072. 3243.39   3
  -8   1  -3 173906. 4626.73   1
   1   7  -6 73247.4 1976.73   3
   1   7  -6 69562.8 1227.06   1
  -1  -7   6 71623.9 1025.62   1
  -8   1  -6 66223.8 3032.97   1
  -7   8   6 73246.1 1783.21   2
  -1  -7   6 71017.7 2070.43   3
   7  -8  -6 74733.0 2200.12   3
  -7   8   6 72586.3 2022.38   3
  -8   1  -9 49569.3 2691.51   1
  -7   8   9 53772.1 1815.59   2
  -1  -7   9 52483.8 1859.31   3
   7  -8  -9 53211.2 2072.07   3
   1   7  -9 51014.0 1728.31   3
   1   7 -12 12182.2 924.488   3
  -8   1 -12 12059.1 1369.36   1
  -7   8  12 13013.0 1046.72   2
  -1  -7  12 12523.3 1004.01   3
   7  -8 -12 13481.7 1188.14   3
   1   7 -15 89.0752 165.463   3
  -8   1 -15-44.8852 305.085   1
  -7   8  15-156.052 274.939   2
   7  -8 -15-155.747 370.808   3
   1   7 -18 205.357 223.984   3
  -7   8  18-406.768 444.889   2
  -8   1 -18 346.515 339.399   1
  -1  -7  18 100.491 72.1442   1
  -8   1 -21 3756.75 896.871   1
  -1  -7  21 2906.13 392.433   1
  -1  -7  21 3165.57 678.246   2
  -1  -7  24 774.509 421.338   2
  -8   1 -24 2020.94 759.243   1
  -8   1 -27 980.554 640.300   1
  -1  -7  27 1047.14 516.670   2
  -8   1 -30 1177.35 681.513   1
  -1  -7  30 973.438 513.324   2
  -1  -7  33-1228.97 639.359   2
  -8   1 -33-1163.98 943.364   1
  -8   1 -36-742.188 738.351   1
  -1  -7  36-14.3160 400.653   2
  -8   1 -39-205.032 619.135   1
  -8   0  37-363.822 533.015   2
   0  -8 -37 16.8379 459.772   1
  -8   0  34 1213.74 670.216   2
   0  -8 -34 2098.42 839.403   1
  -8   0  31 63.1696 461.839   2
  -8   8 -31-397.846 509.338   1
   0  -8 -31 1031.35 758.133   1
  -8   8 -28-735.892 524.386   1
  -8   0  28-178.711 420.961   2
   8   0 -28 236.308 422.920   3
   0  -8 -28 565.432 589.699   1
  -8   0  25 4835.58 1017.57   2
   8   0 -25 8546.25 1300.17   3
   0  -8 -25 4587.91 1085.31   1
  -8   8 -25 6883.29 1216.23   1
   0  -8 -22 62185.0 3275.15   1
   8   0 -22 58754.3 3068.16   3
  -8   8 -22 60352.7 3179.05   1
   8   0 -19 48152.6 2679.05   3
  -8   8 -19 53021.9 2883.24   1
   0  -8 -19 54017.4 2864.02   1
  -8   8 -16 30328.6 2067.32   1
   0  -8 -16 31526.0 2126.43   1
   8   0 -16 31744.3 2088.65   3
  -8   8 -13 45532.3 2512.49   1
   0  -8 -13 47403.4 2381.27   1
   8   0 -13 47113.9 2484.32   3
   8   0 -10 22946.0 1678.47   3
   0  -8 -10 21043.5 1459.28   1
  -8   8 -10 20898.8 1583.93   1
  -8   8 -10 20676.9 1265.71   2
   0  -8  -7 938.521 308.310   1
   8   0  -7 888.057 331.896   3
  -8   8  -7 731.002 301.667   1
   8  -8   4 33250.2 1401.21   3
   8   0  -4 32375.1 1989.01   3
  -8   0   4 32489.8 1775.39   1
   0   8   4 34336.1 1575.97   1
   0  -8  -4 33973.3 1560.86   1
   8  -8   1 59713.8 1822.03   3
   0   8   1 64622.3 1920.62   1
   8   0  -1 62670.2 2853.78   3
   0  -8  -1 64062.0 1890.35   1
  -8   0   1 60718.3 2582.96   1
  -8   0  -2 46041.3 2409.85   1
  -8   8   2 50465.5 1653.22   3
   8   0   2 43353.5 2395.66   3
   0   8  -2 48409.3 1574.68   3
   0  -8   2 48888.7 1395.85   1
   0   8  -2 48286.3 1422.89   1
   8  -8  -2 49091.3 1709.86   3
  -8   0  -5 67464.0 3005.38   1
  -8   8   5 71544.2 2077.49   3
   0   8  -5 71247.8 1747.04   3
   0   8  -5 70876.8 1406.31   1
   8  -8  -5 71104.1 2198.51   3
  -8   0  -8 13761.6 1404.73   1
   8  -8  -8 16210.4 1161.34   3
   0   8  -8 14782.4 850.880   3
  -8   8   8 15056.5 945.049   2
   0  -8   8 15950.4 960.077   3
   0  -8  11 12963.7 961.598   3
   8  -8 -11 13449.9 1134.56   3
   0   8 -11 12332.2 861.760   3
  -8   8  11 12978.7 999.657   2
  -8   0 -11 13000.1 1388.91   1
  -8   0 -14 24748.2 1991.89   1
  -8   8  14 23458.7 1509.57   2
   0   8 -14 22835.4 1331.52   3
   8  -8 -14 25600.6 1738.69   3
   0   8 -17 6184.23 775.065   3
   8  -8 -17 6070.79 898.148   3
  -8   0 -17 6225.52 1054.14   1
  -8   8  17 5250.96 731.385   2
   0  -8  20 19582.8 1603.48   2
   0  -8  20 15657.5 758.922   1
  -8   8  20 17530.6 1522.45   2
  -8   8  23 10477.0 1258.96   2
   0  -8  23 12881.0 1408.31   2
  -8   0 -23 14859.6 1835.02   1
  -8   0 -26 942.409 610.655   1
   0  -8  26 1144.70 552.159   2
  -8   0 -29 933.494 622.789   1
   0  -8  29 1470.36 578.961   2
  -8   0 -32-147.573 528.293   1
   0  -8  32-65.8395 429.751   2
  -8   0 -35 30.1382 526.350   1
   0  -8  35 92.1870 350.856   2
  -8   0 -38-346.795 626.468   1
  -8  -1 -37-276.143 560.339   1
   1  -9  34 529.986 521.051   2
  -8  -1 -34 704.234 723.431   1
  -8  -1 -31 442.433 587.914   1
   1  -9  31 531.940 457.572   2
  -8  -1 -28-1317.06 729.209   1
   1  -9  28-42.3720 387.305   2
   1  -9  25 20867.8 1870.17   2
  -8  -1 -25 23855.6 2398.36   1
  -9   8  25 22276.2 1945.97   2
  -9   8  22 46984.6 2684.53   2
   1  -9  22 46773.2 2646.47   2
  -8  -1 -19 42762.3 2831.91   1
  -9   8  19 36413.9 2177.50   2
   9  -8 -19 36231.5 2357.33   3
   1  -9  19 42975.1 2279.59   2
   9  -8 -16 64177.5 2886.23   3
  -9   8  16 59534.2 2619.65   2
  -8  -1 -16 67838.7 3408.70   1
   1  -9  13 16211.9 1138.47   3
  -9   8  13 15550.0 1205.53   2
  -8  -1 -13 18390.0 1743.28   1
  -1   9 -13 15382.1 1039.67   3
   9  -8 -13 15713.5 1369.53   3
  -1   9 -10 149.605 114.926   3
  -9   8  10 247.607 174.142   2
  -8  -1 -10 59.7444 420.279   1
   1  -9  10 307.131 144.839   3
   9  -8 -10 402.795 225.945   3
  -1   9  -7 435.671 145.909   3
   1  -9   7 535.930 172.927   3
   9  -8  -7 451.365 215.658   3
  -8  -1  -7 303.175 248.766   1
  -1   9  -4 18584.7 806.477   3
   9  -8  -4 18778.2 1225.59   3
  -8  -1  -4 17207.2 1541.19   1
  -1   9  -4 20173.8 838.998   1
  -9   8   4 18927.7 1115.71   3
  -8  -1  -1 44792.0 2398.35   1
  -1   9  -1 49182.6 1573.30   1
   8   1   1 45784.6 2546.76   3
  -9   8   1 50397.5 1841.84   3
   9  -8  -1 45402.2 1817.07   3
   1  -9   1 48374.0 1526.34   1
  -1   9  -1 45935.4 1479.47   3
   1  -9  -2 55076.0 1891.26   1
   8   1  -2 51981.0 2645.29   3
  -8  -1   2 52543.2 2413.90   1
  -1   9   2 54841.0 1875.35   1
   9  -8   2 49570.7 1877.92   3
   1  -9  -5 131991. 3270.52   1
   8   1  -5 130974. 4124.84   3
   9  -8   5 123865. 3074.18   3
  -8  -1   5 130044. 3637.18   1
   1  -9  -8 79628.4 2748.88   1
   8   1  -8 85642.6 3310.32   3
  -9   8  -8 77435.8 3092.84   1
   8   1 -11 17976.3 1549.14   3
  -9   8 -11 16111.9 1216.45   2
  -9   8 -11 19397.4 1668.66   1
   1  -9 -11 18372.2 1418.69   1
  -9   8 -14 3551.70 775.332   1
   8   1 -14 3765.33 735.591   3
   1  -9 -14 2632.47 515.448   1
  -9   8 -17-78.4021 577.266   1
   8   1 -17 20.0564 423.532   3
   1  -9 -17 136.569 493.346   1
   8   1 -20 156.841 433.707   3
  -9   8 -20 1575.91 532.325   1
   1  -9 -20 1113.06 499.910   1
   8   1 -23 1791.85 630.674   3
  -9   8 -23 3490.76 890.203   1
   1  -9 -23 1971.41 729.734   1
  -9   8 -26 313.155 409.632   1
   8   1 -26 316.629 365.147   3
   1  -9 -26 48.6745 508.138   1
  -8  -1  26-501.133 558.173   2
   8   1 -29 2992.06 882.597   3
  -9   8 -29 1741.72 687.974   1
   1  -9 -29 3479.76 1009.11   1
  -8  -1  29 3018.34 902.603   2
  -8  -1  32-829.579 617.890   2
  -9   8 -32 657.234 586.344   1
   1  -9 -32 1161.11 792.699   1
   1  -9 -35-266.232 534.338   1
  -8  -1  35-1260.79 693.309   2
   1  -9 -38-732.474 667.885   1
  -7  -2 -38 178.473 569.679   1
  -7  -2 -35 563.012 632.087   1
  -7  -2 -32 1705.45 932.268   1
  -7  -2 -29 3728.29 1088.22   1
   2  -9  29 2385.34 802.229   2
  -9   7  29 1627.23 650.644   2
  -9   7  26 6086.07 1107.71   2
   2  -9  26 5649.03 1053.13   2
  -7  -2 -26 6596.24 1356.56   1
   2  -9  23 29878.1 2061.72   2
  -7  -2 -23 32431.5 2647.45   1
  -2   9 -23 20305.7 1033.68   1
   9  -7 -23 30226.4 2317.18   3
  -9   7  23 22294.4 1930.41   2
  -9   7  20 39251.5 2357.49   2
   2  -9  20 41943.1 2273.35   2
  -7  -2 -20 45713.1 2936.58   1
   9  -7 -20 40319.3 2491.13   3
  -2   9 -17 21298.2 672.135   1
  -9   7  17 25963.6 1775.80   2
   2  -9  17 26002.8 1675.17   2
  -7  -2 -17 28691.6 2232.98   1
   9  -7 -17 25074.5 1857.69   3
   9  -7 -14 59071.7 2642.69   3
   2  -9  14 56976.1 2168.83   3
  -7  -2 -14 55833.2 2950.95   1
   2  -9  14 55753.3 2207.87   2
  -9   7  14 54096.6 2326.07   2
   2  -9  11 11709.3 840.806   3
  -7  -2 -11 10984.3 1259.81   1
   9  -7 -11 10863.1 1089.06   3
   2  -9   8 11544.0 683.238   3
  -2   9  -8 11043.9 508.945   1
  -2   9  -8 12682.3 672.811   3
  -2   9  -8 11363.8 429.083   1
  -7  -2  -8 10554.6 1149.82   1
   9  -7  -8 10747.3 1018.86   3
  -2   9  -5 77431.4 1308.29   3
  -7  -2  -5 78105.5 3054.01   1
  -2   9  -5 79136.5 1552.86   1
   9  -7  -5 78968.7 2617.05   3
  -2   9  -2 64315.1 1209.18   3
  -9   7   2 66404.1 2179.91   3
  -2   9  -2 63681.9 1681.93   1
   9  -7  -2 59199.9 2189.16   3
   7   2   2 56861.6 2786.31   3
  -7  -2  -2 61048.7 2661.49   1
   2  -9  -1 130262. 2753.14   1
  -7  -2   1 118990. 3628.43   1
   7   2  -1 124175. 4002.70   3
   9  -7   1 121671. 3103.96   3
  -2   9   1 126603. 2733.71   1
  -7  -2   4 44708.6 2070.39   1
   9  -7   4 44638.2 1936.63   3
   2  -9  -4 47986.8 1877.37   1
   7   2  -4 46253.1 2349.09   3
   7   2  -7 38004.0 2125.35   3
  -7  -2   7 40073.7 1853.41   1
  -9   7  -7 36608.4 2100.23   1
   2  -9  -7 39450.2 1876.09   1
   2  -9 -10 46079.7 2180.54   1
   7   2 -10 44756.8 2325.18   3
  -9   7 -10 43570.7 2481.22   1
   2  -9 -13 13059.0 1234.13   1
  -9   7 -13 12752.6 1397.31   1
   7   2 -13 12679.0 1274.59   3
  -9   7 -16 15739.9 1608.93   1
   2  -9 -16 15545.5 1406.20   1
   7   2 -16 14571.1 1418.69   3
  -9   7 -19 6633.75 1099.01   1
   7   2 -19 6647.08 1034.12   3
   2  -9 -19 5371.67 857.915   1
  -9   7 -22 1370.33 582.113   1
   2  -9 -22 777.956 429.490   1
   7   2 -22 1621.84 613.580   3
   2  -9 -25 576.698 456.371   1
   7   2 -25 1569.22 576.490   3
  -9   7 -25 2285.06 736.467   1
  -7  -2  25 1685.67 576.383   2
  -9   7 -28 806.602 442.575   1
   7   2 -28 1065.75 554.181   3
  -7  -2  28 529.713 472.178   2
   2  -9 -28 360.949 398.268   1
   2  -9 -31-74.6073 455.170   1
  -9   7 -31-352.522 563.781   1
  -7  -2  31 57.5366 427.558   2
  -9   7 -34-461.845 560.546   1
   2  -9 -34-204.541 533.500   1
  -7  -2  34-1383.32 695.909   2
   2  -9 -37 42.2798 430.661   1
  -7  -2  37-1417.57 711.845   2
  -6  -3 -39 951.221 805.162   1
  -6  -3 -36 622.273 649.743   1
  -9   6  33 1337.86 684.463   2
  -6  -3 -33 2036.80 929.705   1
  -6  -3 -30 7379.59 1562.94   1
  -9   6  30 5407.71 1161.44   2
  -9   6  27 5534.50 1106.54   2
   3  -9  27 5755.33 1061.49   2
  -6  -3 -27 8401.62 1453.60   1
  -6  -3 -24 8012.74 1393.69   1
   3  -9  24 6806.97 1050.16   2
  -9   6  24 6837.22 1144.09   2
   9  -6 -24 8661.32 1293.98   3
  -3   9 -24 5502.35 647.882   1
  -6  -3 -21 14687.9 1720.29   1
   3  -9  21 15417.0 1391.88   2
  -9   6  21 13075.0 1470.17   2
  -3   9 -21 14086.6 912.738   1
   3  -9  18 4542.97 694.201   2
  -9   6  18 4939.54 841.154   2
  -6  -3 -18 5995.27 1046.41   1
   9  -6 -18 6522.65 1020.53   3
  -3   9 -18 5462.53 497.368   1
   3  -9  15 5678.06 712.689   3
   3  -9  15 5163.75 663.731   2
  -9   6  15 5359.44 772.045   2
  -6  -3 -15 6096.80 989.967   1
  -3   9 -15 5634.56 447.849   1
   9  -6 -15 5994.24 900.327   3
   3  -9  12 106697. 2794.83   2
  -3   9 -12 103822. 1753.57   1
  -6  -3 -12 117765. 3957.56   1
   9  -6 -12 113002. 3568.68   3
   3  -9  12 109673. 2629.85   3
   9  -6  -9 90811.4 3051.66   3
   3  -9   9 88468.3 1891.17   3
  -3   9  -9 87501.1 1799.89   1
  -6  -3  -9 91299.7 3307.21   1
   9  -6  -6 109980. 3204.16   3
  -6  -3  -6 112786. 3516.31   1
  -3   9  -6 106109. 1800.36   1
  -6  -3  -3 243999. 4999.91   1
  -9   6   3 259303. 4436.27   3
  -3   9  -3 247676. 3198.52   1
   9  -6  -3 249368. 4697.80   3
  -3   9   0 60889.0 1833.56   1
   9  -6   0 61676.6 2313.57   3
   6   3   0 60862.2 2746.00   3
   6   3   0 63518.0 2344.41   1
  -6  -3   0 60944.2 2425.32   1
   6   3  -3 7334.65 929.344   3
  -6  -3   3 8312.61 859.356   1
  -3   9   3 8173.38 734.285   1
   3  -9  -3 8541.37 764.376   1
   9  -6   3 7562.56 841.944   3
   6   3  -6 648.343 278.367   3
   3  -9  -6 623.697 249.977   1
  -9   6  -6 656.259 328.171   1
  -6  -3   6 822.509 253.919   1
   3  -9  -9 225.765 204.544   1
   6   3  -9 349.882 276.662   3
  -3   9   9-47.2687 190.375   3
  -9   6  -9 60.7365 251.365   1
   6   3 -12 6829.22 909.178   3
  -9   6 -12 7192.86 1079.24   1
   3  -9 -12 7396.22 906.785   1
  -6  -3  15 29846.0 1349.33   1
  -9   6 -15 32913.1 2309.73   1
   3  -9 -15 38431.4 2196.48   1
   6   3 -15 35118.9 2054.15   3
  -6  -3  18 60256.7 2081.61   1
  -9   6 -18 69132.6 3519.13   1
   6   3 -18 64733.3 2923.03   3
   3  -9 -21 17302.2 1741.82   1
  -9   6 -21 17278.6 1806.53   1
   6   3 -21 15574.3 1510.52   3
   6   3 -24 2938.43 774.815   3
  -9   6 -24 3804.15 960.362   1
   3  -9 -24 3901.77 962.079   1
  -6  -3  24 3926.79 911.761   2
  -9   6 -27 1005.61 626.855   1
   6   3 -27 682.060 485.302   3
  -6  -3  27-64.3969 448.289   2
   3  -9 -27 29.6980 416.735   1
  -6  -3  30 496.929 348.593   2
   3  -9 -30 802.698 539.582   1
  -9   6 -30 45.4454 669.879   1
   3  -9 -33 1805.38 786.262   1
  -6  -3  33 1658.96 677.749   2
  -9   6 -33 1621.14 715.248   1
  -9   6 -36 143.658 441.876   1
  -6  -3  36-108.233 515.384   2
   3  -9 -36 121.266 418.814   1
   3  -9 -39-160.506 499.572   1
  -5  -4 -37-103.588 528.231   1
  -5  -4 -34-196.986 566.232   1
  -9   5  34 293.372 396.895   2
  -5  -4 -31 390.647 612.411   1
  -9   5  31 225.942 392.502   2
  -9   5  28 1411.16 639.468   2
  -5  -4 -28 3303.55 1013.87   1
   9  -5 -25 460.566 477.144   3
  -4   9 -25 556.408 305.747   1
  -5  -4 -25-798.094 825.195   1
  -9   5  25 266.541 318.445   2
  -5  -4 -22 405.911 362.199   1
   9  -5 -22 905.157 477.779   3
   4  -9  22 468.007 291.454   2
  -9   5  22 832.398 414.403   2
  -4   9 -22 1101.82 335.813   1
  -9   5  19 10162.8 1205.67   2
   4  -9  19 10699.6 1075.25   2
   9  -5 -19 11379.8 1319.61   3
  -5  -4 -19 11859.0 1426.01   1
  -4   9 -19 11628.6 905.092   1
  -4   9 -16 9723.63 755.224   1
   9  -5 -16 10408.7 1179.54   3
  -5  -4 -16 7381.34 998.666   1
   4  -9  16 8870.82 876.603   2
  -4   9 -13 10804.2 763.269   1
  -5  -4 -13 10959.2 1225.04   1
   4  -9  13 10596.4 885.436   2
   9  -5 -13 10717.8 1132.22   3
   4  -9  13 10592.3 856.266   3
   9  -5 -10 75007.9 2847.31   3
   4  -9  10 72267.2 1807.86   3
  -5  -4 -10 75356.7 2910.88   1
   4  -9  10 68184.2 1982.74   2
  -4   9 -10 66572.1 1940.01   1
   4  -9   7 48672.8 1052.25   3
  -5  -4  -7 52454.6 2315.31   1
   9  -5  -7 50714.4 2285.87   3
   4  -9   7 50729.5 1440.60   2
  -5  -4  -4 19641.0 1337.87   1
  -4   9  -4 17740.0 876.094   1
   9  -5  -4 19833.5 1406.44   3
  -5  -4  -1 21748.5 1348.92   1
   5   4   1 25088.3 1437.26   1
   9  -5  -1 23380.1 1492.54   3
  -4   9  -1 21769.4 1071.42   1
   5   4   1 19760.8 1532.94   3
  -4   9   2 114.614 87.6829   1
   5   4  -2 691.292 304.017   3
  -4   9   2 221.511 84.8051   3
   9  -5   2 145.334 166.893   3
   5   4  -2 321.141 168.825   1
  -5  -4   2 173.686 148.927   1
  -4   9   5 14001.5 803.748   3
  -9   5  -5 13300.6 1266.82   1
   5   4  -5 14166.5 1187.15   3
  -5  -4   5 13342.9 986.147   1
  -4   9   8 24886.4 1277.04   3
   5   4  -8 25275.1 1588.91   3
   4  -9  -8 25457.9 1521.19   1
   4  -9  -8 23300.1 1224.35   2
  -5  -4   8 25045.5 1283.31   1
  -9   5  -8 23918.5 1793.62   1
   5   4 -11 4176.03 624.909   3
  -9   5 -11 4674.40 864.139   1
   4  -9 -11 4387.22 614.721   2
   4  -9 -11 4938.42 747.749   1
  -9   5 -14 10417.8 1316.10   1
  -5  -4  14 10653.7 707.153   1
   5   4 -14 10972.0 1102.43   3
   4  -9 -14 13317.8 1256.55   1
   5   4 -17 33793.1 2049.08   3
  -9   5 -17 34392.4 2462.08   1
   4  -9 -17 40207.9 2321.74   1
  -5  -4  17 33736.4 1402.68   1
   5   4 -20 17749.4 1549.91   3
  -5  -4  20 17302.9 1130.20   1
  -9   5 -20 19889.6 1934.17   1
   4  -9 -20 21571.0 1826.36   1
   5   4 -23 2653.66 694.735   3
  -9   5 -23 3877.86 969.039   1
   4  -9 -23 4720.09 986.057   1
  -5  -4  26 1715.36 726.312   2
  -9   5 -26 1542.84 760.504   1
   4  -9 -26 1971.77 778.143   1
   5   4 -26 689.093 440.099   3
   4  -9 -29-269.089 506.317   1
  -5  -4  29-226.571 473.016   2
  -9   5 -29-1488.62 740.900   1
  -9   5 -32 180.331 460.439   1
   4  -9 -32-25.1742 466.685   1
  -5  -4  32-108.397 436.361   2
  -9   5 -35 443.748 532.435   1
   4  -9 -35 665.858 629.013   1
  -5  -4  35-100.795 445.781   2
  -5  -4  38 211.082 518.487   2
  -9   5 -38-487.517 593.544   1
   4  -9 -38-133.163 486.526   1
  -4  -5 -38-351.465 535.086   1
  -4  -5 -35-340.349 501.235   1
  -9   4  35-379.918 451.924   2
  -4  -5 -32-54.5663 559.821   1
  -9   4  32 261.915 389.075   2
  -4  -5 -29 174.437 478.798   1
  -9   4  29 1052.10 519.361   2
   9  -4 -26 3294.94 836.221   3
  -4  -5 -26 1282.48 631.232   1
  -9   4  26 3131.09 791.181   2
  -5   9 -26 4204.03 721.696   1
   9  -4 -23-15.0234 380.171   3
  -5   9 -23-50.2217 238.424   1
  -9   4  23-166.201 414.046   2
  -4  -5 -23-1094.51 736.985   1
   9  -4 -20-495.518 575.669   3
  -4  -5 -20-696.996 580.932   1
  -5   9 -20-269.577 353.803   1
  -9   4  20-695.899 610.007   2
  -5   9 -17 22343.4 1348.97   1
   9  -4 -17 20159.4 1668.55   3
  -4  -5 -17 23529.6 1880.64   1
  -5   9 -14 33640.3 1591.22   1
   5  -9  14 34494.2 1594.05   2
   9  -4 -14 36980.2 2121.40   3
  -4  -5 -14 34553.4 2153.92   1
   5  -9  14 30960.2 1532.26   3
  -5   9 -11 10525.8 934.393   1
  -4  -5 -11 14155.3 1286.18   1
   5  -9  11 10844.1 810.703   2
   5  -9  11 12265.6 814.136   3
   9  -4 -11 12062.2 1184.89   3
   9  -4  -8 7543.60 892.968   3
   5  -9   8 7084.23 552.515   2
  -4  -5  -8 8080.64 919.602   1
  -5   9  -8 7504.29 698.921   1
   5  -9   8 7266.25 484.425   3
   5  -9   5 36949.1 982.689   2
  -4  -5  -5 39799.4 1840.21   1
   9  -4  -5 38853.1 2029.15   3
   9  -4  -2 126085. 3615.86   3
  -4  -5  -2 129995. 3077.00   1
  -5   9   1 107621. 1462.40   3
   4   5  -1 119412. 2885.26   1
  -5   9   1 110881. 2649.09   1
   9  -4   1 120786. 3603.00   3
  -4  -5   1 111159. 2668.97   1
  -9   4  -1 110883. 3317.01   1
   4   5  -1 106266. 3303.96   3
   4   5  -4 9036.46 908.773   3
  -5   9   4 9379.11 608.070   3
   5  -9  -4 9276.29 529.791   2
  -4  -5   4 8421.61 851.328   3
  -4  -5   4 9247.92 723.234   1
   4   5  -4 10308.1 768.027   1
  -9   4  -4 9198.92 1071.89   1
   4   5  -7 19076.8 1302.07   3
  -9   4  -7 17962.2 1573.98   1
   5  -9  -7 17002.9 926.417   2
  -4  -5   7 17217.4 919.828   1
  -5   9   7 18537.3 1038.66   3
   5  -9 -10 42905.4 1735.22   2
  -9   4 -10 43191.1 2584.35   1
  -4  -5  10 44421.1 1425.86   1
   5  -9 -10 46396.6 2127.53   1
   4   5 -10 43722.3 1991.08   3
   4   5 -13 64258.1 2502.74   3
  -9   4 -13 65256.3 3229.67   1
  -4  -5  13 64299.2 1493.45   1
   5  -9 -13 72848.0 2869.21   1
   5  -9 -16 17257.2 1515.81   1
  -9   4 -16 14570.9 1597.22   1
   4   5 -16 13601.6 1233.30   3
  -4  -5  16 13755.5 779.646   1
   4   5 -19 166.743 306.150   3
  -9   4 -19-141.759 451.335   1
  -4  -5  19 484.663 164.845   1
   5  -9 -19-289.909 452.431   1
   4   5 -22 1544.59 511.407   3
   5  -9 -22 1380.77 473.144   1
  -9   4 -22 2019.47 717.973   1
   5  -9 -25 4935.25 940.760   1
  -4  -5  25 6016.98 1036.86   2
   4   5 -25 6009.30 989.760   3
  -9   4 -25 6456.16 1242.61   1
  -9   4 -28-541.382 663.164   1
   5  -9 -28 293.785 462.888   1
  -4  -5  28-246.272 422.558   2
   5  -9 -31-17.3997 436.403   1
  -4  -5  31-612.744 503.055   2
  -9   4 -31-284.702 573.186   1
  -9   4 -34-12.3143 478.640   1
   5  -9 -34 83.3215 464.435   1
  -4  -5  34 317.353 464.427   2
   5  -9 -37 1119.27 764.532   1
  -9   4 -37-190.949 482.090   1
  -4  -5  37 258.772 491.683   2
  -9   4 -40 150.516 547.990   1
  -3  -6 -39 459.915 583.979   1
  -3  -6 -36-7.98353 500.068   1
  -9   3  36 735.229 584.360   2
  -3  -6 -33-832.308 632.809   1
  -9   3  33 670.775 517.443   2
  -9   3  30 1536.17 600.996   2
  -3  -6 -30 1205.58 541.376   1
  -6   9 -27 3115.81 721.840   1
   9  -3 -27 2581.47 772.783   3
  -9   3  27 2418.83 749.448   2
  -3  -6 -27 2111.34 762.048   1
   9  -3 -24 4348.43 908.257   3
  -6   9 -24 5179.34 853.735   1
  -9   3  24 5869.21 1014.79   2
  -3  -6 -24 4733.39 978.866   1
   9  -3 -21-757.645 434.451   3
  -6   9 -21-167.796 363.433   1
  -3  -6 -21-97.0008 414.898   1
  -9   3  21-528.125 505.567   2
  -3  -6 -18 5102.65 906.314   1
  -6   9 -18 4808.04 692.949   1
   9  -3 -18 4291.22 814.775   3
  -3  -6 -15 17240.9 1534.97   1
   6  -9  15 15592.4 1124.81   3
  -6   9 -15 18215.9 1321.05   1
   9  -3 -15 18213.8 1565.71   3
  -3  -6 -12 30779.7 1940.18   1
   6  -9  12 27565.0 1289.75   3
  -6   9 -12 29625.7 1678.92   1
   9  -3 -12 31736.8 1974.26   3
  -6   9  -9 10012.9 913.495   1
  -3  -6  -9 11194.7 1088.41   1
   9  -3  -9 11485.5 1176.22   3
  -3  -6  -6 4696.56 658.679   1
   9  -3  -6 5197.45 768.530   3
   9  -3  -3 37063.7 2054.34   3
   3   6   3 41240.0 1775.69   1
  -3  -6  -3 38025.9 1652.65   1
   3   6   0 51426.9 1868.47   1
   9  -3   0 46277.9 2316.34   3
  -6   9   0 47328.6 1111.38   3
   3   6   0 42120.7 2038.46   3
  -3  -6   0 45809.2 1635.81   1
  -9   3   0 45258.4 2189.75   1
   6  -9   0 45939.9 1055.14   3
  -6   9   3 92674.9 1810.37   3
   3   6  -3 90955.0 2272.50   1
   6  -9  -3 101764. 2059.54   3
  -3  -6   3 94035.3 2076.80   1
  -9   3  -3 94849.5 3411.31   1
   9  -3   3 92548.4 3319.14   3
   3   6  -3 99249.4 2898.29   3
  -9   3  -6 21203.1 1729.93   1
   3   6  -6 21980.9 1332.97   3
  -3  -6   6 20534.7 1268.41   3
  -3  -6   6 21452.6 847.111   1
  -6   9   6 21678.8 1071.91   3
  -6   9   9 29882.4 1471.79   3
   3   6  -9 29554.0 1530.09   3
  -3  -6   9 27271.5 830.752   1
  -9   3  -9 28405.1 2092.01   1
  -3  -6  12 5888.37 398.169   1
  -9   3 -12 5872.15 987.654   1
  -3  -6  12 5771.33 336.712   1
   3   6 -12 5651.92 712.228   3
  -3  -6  15 17549.7 686.189   1
  -9   3 -15 18583.1 1787.83   1
   3   6 -15 17513.7 1309.65   3
   3   6 -18 11410.9 1123.80   3
   6  -9 -18 13938.4 1391.80   1
  -9   3 -18 12453.2 1500.88   1
  -3  -6  18 12215.3 695.944   1
   6  -9 -21-628.292 628.035   1
   3   6 -24 2015.91 544.673   3
  -3  -6  24 1396.47 517.649   2
  -9   3 -24 2010.37 642.158   1
   6  -9 -24 161.980 707.862   1
  -3  -6  27 515.771 442.877   2
  -9   3 -27 545.939 539.178   1
   6  -9 -27 1180.37 562.942   1
  -9   3 -30-991.198 691.046   1
   6  -9 -30 423.154 477.553   1
  -3  -6  30-214.820 510.212   2
  -3  -6  33 10.6163 412.310   2
  -9   3 -33-1591.56 832.078   1
  -9   3 -36-682.188 692.424   1
  -3  -6  36 493.740 487.732   2
  -9   3 -39-15.0510 518.175   1
  -9   2  37 331.340 522.640   2
  -2  -7 -37-329.816 546.702   1
  -9   2  34 1019.32 593.199   2
  -2  -7 -34 87.0424 503.852   1
  -9   2  31 551.102 522.291   2
  -2  -7 -31 4.79723 449.540   1
  -9   2  28 155.562 429.351   2
   9  -2 -28 365.424 443.727   3
  -2  -7 -28 155.429 462.476   1
  -7   9 -28-104.372 305.584   1
   9  -2 -25 4993.88 1036.65   3
  -9   2  25 6357.71 1160.31   2
  -2  -7 -25 8240.24 1447.92   1
  -7   9 -25 5948.06 1040.11   1
   9  -2 -22 1584.96 598.295   3
  -2  -7 -22 2995.47 889.310   1
  -7   9 -22 1736.30 575.566   1
  -2  -7 -19 22571.7 1881.38   1
   9  -2 -19 19233.0 1738.83   3
  -7   9 -19 21555.2 1673.67   1
  -7   9 -16 21350.7 1619.69   1
  -2  -7 -16 25253.2 1874.39   1
   9  -2 -16 22217.7 1774.28   3
  -2  -7 -13 863.392 307.318   1
  -7   9 -13 1366.54 412.719   1
   9  -2 -13 1017.52 337.308   3
   9  -2 -10 22117.1 1682.27   3
  -2  -7 -10 21486.5 1503.29   1
  -7   9 -10 19182.5 1405.03   1
  -7   9  -7 40327.7 1811.44   1
  -2  -7  -7 43477.4 1980.35   1
   9  -2  -7 46760.6 2399.85   3
  -2  -7  -4 32559.8 1573.03   1
   9  -2  -4 34058.9 2030.79   3
   7  -9   4 31554.1 1036.87   3
   2   7   1 8229.74 738.036   1
  -2  -7  -1 8226.44 704.718   1
  -9   2   1 7352.96 883.235   1
   9  -2  -1 7560.66 983.397   3
   7  -9   1 7596.07 505.479   3
  -9   2  -2 15456.6 1373.01   1
  -7   9   2 16663.9 807.145   3
   7  -9  -2 16315.8 830.450   3
   2   7  -2 16412.6 1140.81   3
  -2  -7   2 16521.3 867.276   1
   9  -2   2 16597.0 1462.85   3
   2   7  -2 17202.7 984.590   1
   7  -9  -5 15924.4 968.289   3
   2   7  -5 16528.8 1069.20   3
  -9   2  -5 15495.7 1506.64   1
   2   7  -5 14933.9 778.458   1
  -2  -7   5 14783.3 678.798   1
  -2  -7   5 14242.1 1014.18   3
  -7   9   5 14969.4 872.996   3
  -7   9   8 33632.5 1517.99   3
   7  -9  -8 34403.1 1641.32   3
  -2  -7   8 32279.1 1554.76   3
  -9   2  -8 33375.4 2266.38   1
   2   7  -8 33979.1 1537.63   3
   7  -9 -11 38865.9 1936.00   3
   2   7 -11 36477.7 1650.98   3
  -9   2 -14 921.605 490.806   1
   2   7 -14 419.039 230.265   3
   2   7 -17 5567.75 764.787   3
  -9   2 -17 5909.06 1071.17   1
  -2  -7  20 1948.20 279.142   1
   2   7 -20 1613.45 467.770   3
  -9   2 -20 2379.99 749.714   1
  -2  -7  23 100.862 347.352   2
  -9   2 -23 116.714 387.291   1
   2   7 -23 338.002 326.550   3
  -9   2 -26 1575.26 698.463   1
  -2  -7  26 1812.09 606.997   2
  -2  -7  29 14.6606 521.480   2
  -9   2 -29 267.200 510.580   1
  -9   2 -32-2537.08 995.123   1
  -2  -7  32-968.813 596.632   2
  -9   2 -35-2119.44 977.316   1
  -2  -7  35 271.866 476.227   2
  -9   2 -38-832.507 738.069   1
  -2  -7  38 213.327 491.651   2
  -9   2 -41-652.140 688.868   1
  -1  -8 -38-228.918 538.425   1
  -9   1  35 953.739 662.434   2
  -1  -8 -35 791.386 675.023   1
  -9   1  32 1879.42 792.586   2
  -1  -8 -32 2218.74 915.246   1
  -9   1  29 610.255 549.820   2
  -8   9 -29 1550.35 717.999   1
  -1  -8 -29 1543.67 818.487   1
   9  -1 -29 1508.05 726.229   3
  -1  -8 -26 14143.6 1815.79   1
  -8   9 -26 13532.8 1629.52   1
   9  -1 -26 11078.0 1518.18   3
  -9   1  26 11251.3 1497.33   2
  -1  -8 -23 42266.8 2798.57   1
  -8   9 -23 40275.0 2570.75   1
  -8   9 -20 55900.1 2931.14   1
  -1  -8 -20 62058.1 3179.65   1
   9  -1 -20 52457.4 2926.93   3
   9  -1 -17 91408.0 3718.86   3
  -1  -8 -17 96059.2 3724.23   1
  -8   9 -17 94195.4 3694.84   1
  -8   9 -14 86149.2 3433.64   1
  -1  -8 -14 91820.4 3386.64   1
   9  -1 -14 88962.2 3570.76   3
   9  -1 -11 23365.7 1783.93   3
  -8   9 -11 22569.9 1305.63   2
  -8   9 -11 22475.5 1666.16   1
  -1  -8 -11 22697.1 1625.94   1
   9  -1  -8 41264.7 2332.71   3
  -8   9  -8 39705.0 2032.42   1
  -1  -8  -8 38795.5 1939.88   1
  -8   9  -8 39209.0 1442.99   2
   8  -9   5 66629.6 1868.89   3
   9  -1  -5 67751.5 3000.35   3
  -1  -8  -5 69929.8 2371.45   1
  -8   9  -5 62656.5 1399.10   2
   1   8   2 82133.7 2367.12   1
   9  -1  -2 79549.0 3253.52   3
  -1  -8  -2 76767.0 2256.50   1
   8  -9   2 76303.3 1889.39   3
  -9   1   2 77708.3 2973.96   1
   1   8  -1 103938. 2790.23   3
   8  -9  -1 109389. 2379.20   3
   1   8  -1 118371. 2549.81   1
  -9   1  -1 107227. 3675.50   1
  -8   9   1 118238. 2442.08   3
   9  -1   1 114886. 3980.61   3
  -1  -8   1 108353. 2337.61   1
  -9   1  -4 151471. 4651.51   1
  -8   9   4 153977. 2868.85   3
  -8   9   4 145087. 2186.21   2
   1   8  -4 158338. 3105.62   3
   8  -9  -4 149772. 3047.29   3
   1   8  -4 156933. 2564.42   1
  -1  -8   4 153940. 2281.43   1
  -8   9   7 103805. 2604.75   3
  -8   9   7 103429. 2293.46   2
   8  -9  -7 103457. 2839.35   3
  -9   1  -7 102292. 3965.13   1
  -1  -8   7 99342.4 2598.58   3
   1   8  -7 103423. 2479.83   3
  -1  -8  10 73647.6 2345.54   3
  -8   9  10 75201.7 2316.75   2
   8  -9 -10 79948.4 2716.18   3
  -9   1 -10 74009.5 3463.03   1
   1   8 -10 74228.6 2189.76   3
   1   8 -13 41428.0 1790.54   3
  -9   1 -13 42209.7 2729.14   1
   8  -9 -13 46054.9 2260.73   3
  -8   9  13 41804.4 1939.40   2
  -8   9  16 3420.19 611.750   2
  -9   1 -16 4004.61 892.152   1
   8  -9 -16 4326.82 774.766   3
   1   8 -16 4344.01 641.550   3
   1   8 -19 2045.00 518.970   3
  -9   1 -19 2243.96 740.134   1
  -1  -8  22 1362.04 498.287   2
  -9   1 -22 2350.25 815.736   1
  -9   1 -25 1424.84 789.534   1
  -1  -8  25 545.132 414.096   2
  -9   1 -28-944.394 756.138   1
  -1  -8  28-208.430 442.559   2
  -1  -8  31 676.510 466.444   2
  -9   1 -31-16.0945 495.157   1
  -1  -8  34-893.444 587.569   2
  -9   1 -34-1820.87 900.757   1
  -9   1 -37-1291.14 830.625   1
  -1  -8  37 123.494 371.605   2
  -9   1 -40 22.5978 472.316   1
  -9   0  36-508.594 517.630   2
   0  -9 -36-78.3303 426.369   1
   0  -9 -33 739.454 608.834   1
  -9   0  33-97.3262 448.044   2
  -9   9 -30 184.042 416.653   1
   0  -9 -30 1119.89 681.797   1
  -9   0  30 433.734 530.512   2
   9   0 -30 844.072 545.772   3
  -9   9 -27 1853.38 702.344   1
   9   0 -27 1091.81 644.018   3
   0  -9 -27 941.017 598.263   1
  -9   0  27 805.345 602.133   2
  -9   9 -24 2440.29 760.209   1
   0  -9 -24 1063.64 673.391   1
   9   0 -24 2037.22 695.880   3
   0  -9 -21 2239.96 767.169   1
   9   0 -21 3106.39 926.913   3
  -9   9 -21 1894.29 706.391   1
   0  -9 -18 10025.4 1243.03   1
   9   0 -18 7658.71 1125.77   3
  -9   9 -18 7652.98 1139.73   1
   9   0 -15 33980.4 2255.86   3
  -9   9 -15 33801.0 2319.70   1
   0  -9 -15 31780.7 2047.11   1
  -9   9 -12 53502.6 2841.10   1
  -9   9 -12 53832.3 2232.45   2
   9   0 -12 56161.5 2871.45   3
   0  -9 -12 52510.1 2510.36   1
   9   0  -9 51315.9 2665.58   3
  -9   9  -9 47927.9 1826.48   2
  -9   9  -9 49332.6 2505.05   1
   0  -9  -9 50710.4 2288.06   1
   9   0  -6 96462.0 3710.37   3
   9  -9   6 92613.0 2531.11   3
   0  -9  -6 96056.0 2932.52   1
   9  -9   3 74844.5 2178.84   3
   9   0  -3 77899.7 3336.14   3
   0  -9  -3 81484.3 2443.09   1
  -9   0   3 78484.1 3056.98   1
  -9   0   0 364.123 213.283   1
   9  -9   0 498.865 205.369   3
   9   0   0 288.516 253.080   3
   0   9   0 125.629 146.181   3
   0   9   0 378.542 163.189   1
  -9   0  -3 8764.67 1156.28   1
   0   9  -3 9486.22 699.680   3
  -9   9   3 9995.79 790.328   3
   0  -9   3 9430.16 630.093   1
   9   0   3 9617.54 1200.37   3
   0   9  -3 10084.9 665.768   1
   9  -9  -3 8382.64 768.867   3
   0   9  -6 20976.6 785.308   1
  -9   0  -6 19435.9 1741.34   1
   0   9  -6 21482.1 1026.03   3
   9  -9  -6 20556.3 1285.10   3
  -9   9   6 20743.1 1195.94   3
  -9   9   6 20728.0 1008.21   2
   0   9  -9 1798.07 329.444   3
   9  -9  -9 1900.20 414.082   3
  -9   0  -9 1994.39 583.805   1
  -9   9   9 2148.44 382.012   2
   0  -9   9 2394.50 402.323   3
   9  -9 -12 32041.1 1875.72   3
  -9   0 -12 31678.5 2352.86   1
  -9   9  12 30290.0 1624.04   2
   0  -9  12 30221.2 1553.68   3
   0   9 -12 30597.9 1426.30   3
   0   9 -15 44278.5 1943.18   3
   9  -9 -15 50022.3 2542.38   3
  -9   0 -15 47825.2 2982.03   1
  -9   9  15 46922.5 2195.23   2
  -9   9  18 13550.9 1291.75   2
   0   9 -18 12892.0 1151.10   3
  -9   0 -18 13886.5 1645.47   1
   9  -9 -18 14929.9 1495.02   3
  -9   9  21 4529.15 862.234   2
   0  -9  21 5169.14 901.032   2
  -9   0 -21 6230.22 1270.33   1
  -9   0 -24 4295.21 1118.44   1
   0  -9  24 1805.36 659.576   2
  -9   0 -27-2044.48 853.445   1
   0  -9  27-1287.78 582.575   2
   0  -9  30 624.187 463.831   2
  -9   0 -30 45.4380 569.631   1
  -9   0 -33-1198.49 769.147   1
   0  -9  33-890.301 562.884   2
  -9   0 -36-1593.11 898.726   1
   0  -9  36-656.690 518.299   2
  -9   0 -39-235.410 537.786   1
  -9  -1 -38 694.924 820.979   1
   1 -10  35 362.350 505.882   2
  -9  -1 -35 68.9309 552.696   1
  -9  -1 -32 1489.79 780.543   1
   1 -10  32 1551.71 639.840   2
  -9  -1 -29 1220.93 727.141   1
   1 -10  29 1316.51 588.081   2
   1 -10  26-435.552 450.799   2
 -10   9  26-389.297 490.764   2
  -9  -1 -26-830.185 709.867   1
 -10   9  23 2896.78 781.004   2
  -9  -1 -23 3413.76 1035.50   1
   1 -10  23 2034.62 582.003   2
  10  -9 -20 288.696 406.833   3
   1 -10  20-268.525 398.096   2
  -9  -1 -20-131.551 464.955   1
 -10   9  20-57.7630 325.658   2
 -10   9  17 710.681 377.388   2
  -9  -1 -17 807.743 504.692   1
  10  -9 -17 916.561 491.049   3
   1 -10  14 89.0782 135.594   3
 -10   9  14 145.085 281.449   2
  -9  -1 -14 240.868 453.130   1
  10  -9 -14-165.874 352.936   3
  -1  10 -14 190.676 177.157   3
  -1  10 -11 27824.7 1267.04   3
  -9  -1 -11 29684.4 2257.87   1
  10  -9 -11 29373.7 1830.71   3
   1 -10  11 26725.1 1350.43   3
 -10   9  11 28168.8 1545.66   2
  -9  -1  -8 36847.5 2450.08   1
   1 -10   8 31553.7 1339.86   3
  -1  10  -8 32642.1 1226.51   3
  10  -9  -8 33551.9 1845.59   3
  -1  10  -5 51169.9 1410.89   3
  -9  -1  -5 48231.2 2759.30   1
  -1  10  -5 51316.8 1369.45   1
  10  -9  -5 50037.9 2115.96   3
  10  -9  -2 28500.8 1529.41   3
  -9  -1  -2 29124.1 2118.81   1
 -10   9   2 32793.4 1556.90   3
   9   1   2 29534.4 2180.94   3
  -1  10  -2 31551.6 1212.35   3
  -1  10  -2 30709.0 1291.08   1
   1 -10   2 30649.8 1229.42   1
   1 -10  -1 6488.97 674.307   1
   9   1  -1 5801.92 976.054   3
  -1  10   1 6968.49 686.364   1
  10  -9   1 5731.33 674.457   3
  -9  -1   1 6260.80 930.492   1
  -9  -1   4 3881.20 704.113   1
  10  -9   4 3660.45 557.788   3
   1 -10  -4 3633.35 563.365   1
   9   1  -4 3369.99 705.991   3
 -10   9  -7 9843.01 1155.03   1
   9   1  -7 10108.9 1253.46   3
  -9  -1   7 10340.6 1074.07   1
   1 -10  -7 10003.7 1001.81   1
 -10   9 -10 3376.72 712.434   1
   1 -10 -10 4053.99 671.064   1
 -10   9 -13 8244.66 1246.45   1
   9   1 -13 7905.99 1112.29   3
   1 -10 -13 7094.71 986.064   1
 -10   9 -16 8933.97 1245.59   1
   1 -10 -16 10426.8 1239.35   1
   9   1 -16 10305.1 1296.86   3
 -10   9 -19 12581.0 1535.70   1
   9   1 -19 10598.3 1317.35   3
   1 -10 -19 12498.4 1464.45   1
 -10   9 -22 3808.14 869.339   1
   1 -10 -22 3933.49 866.332   1
   9   1 -22 3532.50 815.627   3
   9   1 -25-607.688 538.855   3
 -10   9 -25-400.521 590.964   1
   9   1 -28-800.588 522.019   3
 -10   9 -28-1440.47 700.898   1
   1 -10 -28-748.809 659.475   1
  -9  -1  28-1409.96 767.210   2
 -10   9 -31-1045.37 682.875   1
   1 -10 -31 1122.26 729.155   1
  -9  -1  31-2000.15 786.588   2
   9   1 -31 147.337 395.753   3
   1 -10 -34 160.021 509.211   1
  -9  -1  34-154.765 494.263   2
   1 -10 -37 433.448 655.388   1
  -8  -2 -36 230.245 584.284   1
  -8  -2 -33-98.9284 652.854   1
 -10   8  30 1149.19 574.415   2
   2 -10  30 886.726 480.291   2
  -8  -2 -30 1663.40 828.592   1
  -8  -2 -27 465.673 572.897   1
 -10   8  27 328.484 423.340   2
   2 -10  27-993.319 524.533   2
  -8  -2 -24 2750.40 904.564   1
 -10   8  24 3852.80 899.050   2
   2 -10  24 2458.83 694.107   2
   2 -10  21 6879.30 1025.39   2
 -10   8  21 6395.80 1025.85   2
  -8  -2 -21 11199.9 1595.59   1
  10  -8 -21 9869.57 1360.37   3
  10  -8 -18 18348.8 1682.61   3
 -10   8  18 16555.7 1463.28   2
  -8  -2 -18 21995.5 2055.80   1
   2 -10  18 18439.2 1455.24   2
  10  -8 -15 27952.1 1947.82   3
  -8  -2 -15 28040.1 2252.88   1
 -10   8  15 25722.9 1692.07   2
   2 -10  15 26338.2 1536.74   3
   2 -10  12 16895.4 1064.92   3
  -8  -2 -12 15778.3 1602.37   1
 -10   8  12 16720.5 1241.33   2
  10  -8 -12 17327.7 1456.46   3
   2 -10   9 319.959 105.911   3
  10  -8  -9 386.615 250.125   3
  -2  10  -9 336.284 97.3068   3
  -2  10  -6 780.820 150.048   3
  -2  10  -6 888.636 163.197   1
  -8  -2  -6 857.754 454.168   1
  10  -8  -6 739.661 275.939   3
  -2  10  -3 2210.31 242.245   3
  10  -8  -3 1817.96 414.611   3
  -8  -2  -3 2235.91 558.130   1
   8   2   3 1719.29 524.060   3
  -2  10  -3 2363.52 330.759   1
   2 -10   0 4815.81 545.186   1
  -2  10   0 5346.83 565.501   1
  -8  -2   0 4387.83 761.861   1
  -2  10   0 4368.85 437.789   3
  10  -8   0 4929.02 662.628   3
   8   2   0 4496.78 827.540   3
   8   2  -3 22790.3 1809.55   3
  -8  -2   3 23278.1 1651.68   1
  10  -8   3 22303.0 1430.59   3
   2 -10  -3 23551.7 1332.30   1
 -10   8  -6 54658.5 2558.08   1
   2 -10  -6 57501.9 2295.92   1
  -8  -2   6 58756.7 2503.69   1
  10  -8   6 55499.8 2271.15   3
   8   2  -6 56458.5 2819.17   3
   8   2  -9 23473.4 1797.30   3
   2 -10  -9 23051.0 1545.13   1
 -10   8  -9 21315.0 1727.51   1
   2 -10 -12 8758.69 1025.69   1
 -10   8 -12 8048.52 1183.35   1
   8   2 -12 8019.09 1056.25   3
 -10   8 -15-16.7232 355.341   1
   2 -10 -15-18.3055 409.677   1
   8   2 -15 54.4088 364.437   3
   2 -10 -18-428.848 497.801   1
   8   2 -18-453.525 496.087   3
   2 -10 -21-597.358 640.117   1
 -10   8 -21-1557.17 656.934   1
   8   2 -21-270.782 466.581   3
 -10   8 -24 170.888 441.599   1
   2 -10 -24-627.836 494.537   1
   8   2 -24-831.902 602.929   3
   8   2 -27 627.516 489.110   3
 -10   8 -27-619.117 532.833   1
  -8  -2  27 247.811 344.536   2
   2 -10 -27 733.432 479.467   1
   8   2 -30-516.890 452.209   3
   2 -10 -30-146.965 504.709   1
  -8  -2  30-903.808 605.560   2
 -10   8 -30-754.170 691.541   1
   2 -10 -33-416.605 552.067   1
 -10   8 -33-993.016 769.335   1
  -8  -2  33-686.029 569.877   2
   2 -10 -36-114.040 476.522   1
  -8  -2  36-1085.58 653.695   2
  -7  -3 -37 1013.11 860.935   1
  -7  -3 -34 631.146 731.098   1
 -10   7  31 1292.36 645.670   2
  -7  -3 -31 2174.48 928.359   1
  -7  -3 -28 4429.20 1230.50   1
   3 -10  28 2109.53 757.370   2
 -10   7  28 2423.84 813.573   2
  -7  -3 -25 3688.38 1098.19   1
  10  -7 -25 6206.54 1207.21   3
 -10   7  25 3804.72 958.366   2
   3 -10  25 2771.16 740.789   2
  10  -7 -22 7843.59 1324.12   3
   3 -10  22 3975.12 789.325   2
 -10   7  22 4943.53 928.641   2
  -7  -3 -22 7663.70 1393.18   1
 -10   7  19 11955.5 1314.16   2
   3 -10  19 12417.1 1262.82   2
  -3  10 -19 10781.6 606.914   1
  10  -7 -19 13825.5 1488.00   3
  -3  10 -16 56148.4 1129.06   1
  10  -7 -16 71508.6 3147.20   3
 -10   7  16 63870.2 2748.94   2
  -7  -3 -16 75336.1 3580.45   1
   3 -10  16 65432.9 2524.25   2
  10  -7 -13 82838.0 3240.86   3
   3 -10  13 79088.9 2340.25   3
  -7  -3 -13 80377.1 3534.46   1
   3 -10  13 76355.4 2505.84   2
  -3  10 -10 102424. 1860.01   1
  10  -7 -10 123657. 3720.07   3
  -7  -3 -10 117439. 4073.45   1
  -3  10 -10 102324. 1494.07   1
   3 -10  10 112039. 2328.06   3
  -3  10  -7 145182. 2105.60   1
  10  -7  -7 150702. 4007.91   3
  -7  -3  -7 151202. 4417.97   1
  -7  -3  -4 88360.0 3249.10   1
  10  -7  -4 88285.2 2944.77   3
  -3  10  -4 86548.0 1946.73   1
  10  -7  -1 44664.1 2087.85   3
  -7  -3  -1 45447.9 2264.22   1
   7   3   1 44491.2 2536.45   3
  -3  10  -1 45690.3 1608.85   1
  -3  10  -1 45048.6 919.286   3
  10  -7   2 27163.1 1631.65   3
   3 -10  -2 28276.5 1382.44   1
  -3  10   2 26328.2 1353.50   1
  -7  -3   2 24941.1 1655.84   1
   7   3  -2 27049.2 1929.31   3
   3 -10  -5 27473.5 1528.03   1
  -7  -3   5 28355.2 1665.00   1
   7   3  -5 28730.8 1927.83   3
  10  -7   5 26266.7 1613.18   3
 -10   7  -5 25606.8 1765.49   1
 -10   7  -8 48775.7 2596.97   1
   3 -10  -8 50866.8 2241.26   1
  -7  -3   8 51917.9 2161.65   1
   7   3  -8 51136.6 2552.23   3
   3 -10 -11 72414.3 2884.85   1
   7   3 -11 73526.6 3077.90   3
 -10   7 -11 66167.5 3363.72   1
 -10   7 -14 67025.2 3457.26   1
   3 -10 -14 71737.8 3049.81   1
   7   3 -14 66407.1 2990.34   3
 -10   7 -17 40973.9 2755.60   1
   7   3 -17 39520.4 2378.01   3
   3 -10 -17 42411.8 2491.26   1
   3 -10 -20 14380.8 1590.60   1
 -10   7 -20 12871.9 1661.36   1
   7   3 -20 15072.0 1577.24   3
   3 -10 -23 4097.60 933.793   1
 -10   7 -23 4013.41 954.779   1
   7   3 -23 3558.74 839.923   3
  -7  -3  26-587.386 553.514   2
 -10   7 -26 475.475 440.964   1
   3 -10 -26-366.777 531.809   1
   7   3 -26-279.887 419.051   3
   7   3 -29-232.580 343.115   3
  -7  -3  29-964.714 585.403   2
 -10   7 -29-117.149 479.292   1
   3 -10 -32 845.781 554.666   1
 -10   7 -32-0.35644 530.048   1
  -7  -3  32-10.1566 500.368   2
  -7  -3  35-1222.41 683.966   2
 -10   7 -35-1238.24 750.966   1
   3 -10 -35-446.108 629.934   1
   3 -10 -38-841.247 661.539   1
  -6  -4 -38 204.121 563.784   1
 -10   6  35 287.639 491.453   2
  -6  -4 -35 1024.25 777.471   1
 -10   6  32-87.0800 383.961   2
  -6  -4 -32 632.420 709.546   1
 -10   6  29 3.68075 387.462   2
  -6  -4 -29 2051.35 907.352   1
  -6  -4 -26 5479.37 1189.50   1
 -10   6  26 4888.23 1054.08   2
  10  -6 -26 5597.60 1112.96   3
  -6  -4 -23 10555.6 1515.85   1
  -4  10 -23 10462.0 892.429   1
   4 -10  23 7391.04 977.677   2
 -10   6  23 7732.17 1155.59   2
  10  -6 -23 12655.1 1557.30   3
  -4  10 -20 8068.72 711.983   1
  -6  -4 -20 10248.6 1428.89   1
   4 -10  20 8252.17 981.756   2
 -10   6  20 7658.23 1104.01   2
  10  -6 -20 10168.4 1321.64   3
  -4  10 -17 20101.2 1012.30   1
  10  -6 -17 24787.9 1924.39   3
  -6  -4 -17 24199.4 2004.57   1
   4 -10  17 22384.3 1498.22   2
 -10   6  17 19937.7 1595.74   2
  -6  -4 -14 15828.1 1540.34   1
  10  -6 -14 16529.8 1486.45   3
   4 -10  14 15464.8 1127.90   2
   4 -10  14 14921.3 1061.09   3
  -4  10 -14 16166.8 869.425   1
  -4  10 -11 12959.8 834.844   1
  10  -6 -11 13665.7 1297.78   3
   4 -10  11 13216.7 821.247   3
   4 -10  11 13085.7 917.552   2
  -6  -4 -11 13988.6 1372.01   1
   4 -10   8 24466.9 814.342   3
  -6  -4  -8 26038.4 1785.58   1
  10  -6  -5 20043.0 1462.78   3
  -6  -4  -5 18812.9 1421.87   1
  -4  10  -5 18626.2 917.817   1
  10  -6  -2 25410.7 1632.10   3
  -6  -4  -2 23087.2 1524.54   1
  -4  10  -2 24265.7 1155.50   1
  -4  10   1 27103.9 1337.16   1
  -6  -4   1 28225.5 1609.79   1
  -4  10   1 27467.1 736.254   3
  10  -6   1 30032.0 1763.97   3
   6   4  -1 28475.1 1600.74   1
   6   4  -1 28360.2 1938.74   3
  -4  10   4 42228.0 1316.80   3
   6   4  -4 41700.5 2248.75   3
 -10   6  -4 40264.0 2181.64   1
  10  -6   4 40748.3 2103.15   3
  -6  -4   4 39392.9 1867.83   1
  -4  10   7 51510.1 1804.18   3
  -6  -4   7 47747.2 1998.82   1
   6   4  -7 50853.6 2442.87   3
   4 -10  -7 50399.7 2169.34   1
 -10   6  -7 49188.4 2601.03   1
 -10   6 -10 11690.7 1381.92   1
   4 -10 -10 12874.5 1178.08   1
   4 -10 -10 11334.2 968.654   2
   6   4 -10 12014.5 1216.86   3
  -6  -4  10 11803.2 963.857   1
 -10   6 -13 4097.57 857.536   1
   4 -10 -13 4529.29 771.048   1
   6   4 -13 4222.38 702.553   3
  -6  -4  16 13160.0 896.914   1
   6   4 -16 13694.8 1351.75   3
   4 -10 -16 14734.8 1465.11   1
 -10   6 -16 14321.2 1628.15   1
   4 -10 -19 5728.22 948.474   1
   6   4 -19 6162.50 948.794   3
 -10   6 -19 6325.95 1157.76   1
 -10   6 -22 1571.81 644.152   1
   4 -10 -22 1633.97 565.328   1
   6   4 -22 1447.69 503.673   3
 -10   6 -25 2684.21 871.815   1
   4 -10 -25 2117.42 764.430   1
   6   4 -25 1082.32 509.291   3
  -6  -4  25 2036.77 675.124   2
 -10   6 -28-990.104 823.341   1
   4 -10 -28-659.040 646.659   1
  -6  -4  28-565.919 592.658   2
 -10   6 -31 39.5579 531.609   1
   4 -10 -31 410.497 451.928   1
  -6  -4  31-334.641 505.926   2
 -10   6 -34 815.660 638.350   1
   4 -10 -34 654.766 610.641   1
  -6  -4  34 561.359 461.397   2
   4 -10 -37 557.096 601.634   1
 -10   6 -37-33.6892 475.189   1
  -6  -4  37-130.870 499.165   2
  -5  -5 -36 1053.28 821.026   1
 -10   5  36 1161.11 656.669   2
  -5  -5 -33 3085.34 1146.88   1
 -10   5  33 2607.23 924.371   2
  -5  -5 -30 396.856 590.082   1
 -10   5  30 187.984 444.874   2
  -5  -5 -27 297.006 463.260   1
  10  -5 -27 345.891 440.258   3
  -5  10 -24 40.1567 207.863   1
  -5  -5 -24-795.842 714.533   1
 -10   5  24-519.452 600.604   2
  10  -5 -24-277.360 406.820   3
  -5  10 -21 4676.68 638.258   1
 -10   5  21 3360.78 705.592   2
  10  -5 -21 4525.38 873.433   3
  -5  -5 -21 4459.31 890.906   1
  10  -5 -18 93.2976 239.043   3
  -5  -5 -18-317.524 520.065   1
   5 -10  18-153.567 362.060   2
  -5  10 -18 499.296 190.715   1
   5 -10  15 4936.52 644.287   3
  -5  10 -15 5229.47 602.785   1
   5 -10  15 5064.58 647.807   2
  10  -5 -15 6233.33 933.819   3
  -5  -5 -15 4331.44 808.697   1
  -5  10 -12 20118.8 1221.04   1
  -5  -5 -12 24053.3 1833.87   1
   5 -10  12 22098.2 1211.98   2
  10  -5 -12 23699.8 1751.23   3
   5 -10  12 21736.6 1142.04   3
  10  -5  -9 124250. 3904.79   3
  -5  10  -9 115361. 2765.25   1
   5 -10   9 113002. 2387.00   2
  -5  -5  -9 124172. 3816.98   1
   5 -10   9 119973. 2019.35   3
   5 -10   6 118082. 1969.11   2
  10  -5  -6 122400. 3776.69   3
  -5  -5  -6 127852. 3608.30   1
  -5  -5  -3 96687.1 2977.31   1
  10  -5  -3 97719.1 3313.29   3
  -5  10  -3 89856.8 2219.12   1
  -5  10   0 41387.7 1651.11   1
   5   5   0 41363.6 2286.82   3
  -5  -5   0 43923.3 1886.84   1
  10  -5   0 44119.0 2242.83   3
   5   5  -3 15246.4 1328.62   3
 -10   5  -3 13875.0 1318.72   1
  -5  -5   3 15061.6 1058.41   1
  -5  10   3 15179.1 697.937   3
  10  -5   3 16923.3 1414.16   3
   5   5  -3 15965.3 1099.07   1
 -10   5  -6 5238.24 903.112   1
   5   5  -6 4117.82 664.748   3
   5 -10  -6 3717.05 407.849   2
  -5  10   6 4687.71 498.257   3
  -5  -5   6 4210.03 540.206   1
 -10   5  -9 213.243 395.000   1
   5 -10  -9 396.992 210.769   2
   5   5  -9 110.848 227.525   3
   5 -10  -9 1024.35 508.937   1
  -5  -5   9 106.200 186.029   1
   5 -10 -12 5509.60 895.331   1
  -5  -5  12 4146.03 500.779   1
   5   5 -12 4367.04 716.511   3
 -10   5 -12 4176.54 880.319   1
   5 -10 -15 15993.6 1434.34   1
 -10   5 -15 15590.3 1704.17   1
  -5  -5  15 14639.9 806.527   1
   5   5 -15 14178.5 1302.00   3
   5   5 -18 10782.9 1218.07   3
 -10   5 -18 9937.81 1447.73   1
  -5  -5  18 9779.94 737.197   1
   5 -10 -18 9781.00 1222.55   1
   5   5 -21 3251.54 676.380   3
   5 -10 -21 2500.44 645.989   1
 -10   5 -21 2786.84 809.572   1
   5   5 -24 1618.22 550.161   3
 -10   5 -24 1868.88 741.801   1
   5 -10 -24 590.628 454.424   1
 -10   5 -27 216.742 442.881   1
   5   5 -27 122.795 334.820   3
  -5  -5  27 361.685 382.005   2
   5 -10 -27 741.336 501.730   1
 -10   5 -30-430.738 640.693   1
   5 -10 -30-52.2193 473.142   1
  -5  -5  30-901.221 584.948   2
 -10   5 -33 191.008 523.598   1
  -5  -5  33 89.6104 429.893   2
   5 -10 -33 501.154 570.625   1
 -10   5 -36 737.541 737.892   1
   5 -10 -36 2118.26 988.769   1
  -5  -5  36 527.257 543.291   2
 -10   5 -39 1026.21 902.028   1
  -4  -6 -37 3837.77 1295.60   1
 -10   4  37 2316.61 935.175   2
 -10   4  34 2586.60 962.295   2
  -4  -6 -34 4327.86 1285.85   1
 -10   4  31 3137.71 938.991   2
  -4  -6 -31 2337.01 928.684   1
  -4  -6 -28 3509.80 1110.96   1
  10  -4 -28 4204.39 1012.27   3
 -10   4  28 3336.79 929.031   2
  -4  -6 -25 11942.3 1611.66   1
  -6  10 -25 12011.9 1254.84   1
 -10   4  25 11673.4 1474.24   2
  10  -4 -25 10858.4 1497.55   3
  -6  10 -22 15271.7 1332.08   1
 -10   4  22 14870.1 1583.03   2
  -4  -6 -22 17282.8 1805.56   1
  10  -4 -22 14951.8 1646.48   3
  -6  10 -19 1851.65 444.528   1
  -4  -6 -19 2588.74 735.929   1
  10  -4 -19 3907.64 918.383   3
  -6  10 -16 16163.5 1236.79   1
  -4  -6 -16 17789.2 1650.17   1
   6 -10  16 14785.8 1128.32   3
  10  -4 -16 17429.8 1612.96   3
  10  -4 -13 21682.2 1719.75   3
   6 -10  13 18355.5 1104.73   3
  -6  10 -13 19447.3 1350.15   1
  -4  -6 -13 20364.6 1680.31   1
  -6  10 -10 84638.7 2660.80   1
   6 -10  10 88316.9 1957.19   3
  -4  -6  -7 314354. 5612.66   1
  10  -4  -7 316787. 6260.73   3
  -4  -6  -4 344688. 5484.04   1
  10  -4  -4 348667. 6537.51   3
  -4  -6  -1 568726. 6466.81   1
  10  -4  -1 574477. 8348.03   3
  -6  10   2 353313. 3175.65   3
   4   6  -2 348167. 6180.18   3
  10  -4   2 374932. 6837.85   3
  -4  -6   2 354486. 4676.65   1
 -10   4  -2 363562. 6731.43   1
   4   6  -2 379744. 5245.62   1
   4   6  -5 318360. 5671.90   3
 -10   4  -5 324989. 6669.73   1
  -4  -6   5 308161. 3973.73   1
   6 -10  -5 295600. 3071.16   2
  -6  10   5 306607. 3794.80   3
 -10   4  -8 352068. 7563.94   1
   4   6  -8 357378. 5797.85   3
  -4  -6   8 330254. 3801.29   1
  -6  10   8 351040. 4817.04   3
   6 -10  -8 332934. 4182.93   2
   4   6 -11 49491.1 2219.36   3
 -10   4 -11 52913.3 3057.34   1
   6 -10 -11 45532.0 1831.84   2
  -4  -6  11 43326.4 1343.19   1
   4   6 -14 27042.9 1671.69   3
  -4  -6  14 26879.2 1061.94   1
 -10   4 -14 26936.1 2274.80   1
  -4  -6  14 25395.6 869.913   1
   6 -10 -17 32067.7 2124.22   1
  -4  -6  17 27348.5 1022.62   1
 -10   4 -17 30265.6 2410.16   1
   4   6 -17 28622.6 1817.85   3
   6 -10 -20 1496.98 540.284   1
 -10   4 -20 787.786 480.535   1
   4   6 -20 1166.56 409.058   3
 -10   4 -23 1398.03 645.769   1
   6 -10 -23 1851.90 597.106   1
   4   6 -23 2001.77 580.714   3
   4   6 -26 5678.08 992.069   3
   6 -10 -26 9040.52 1398.82   1
 -10   4 -26 6568.12 1306.72   1
  -4  -6  26 7830.18 1236.11   2
  -4  -6  29 3905.80 979.892   2
 -10   4 -29 5465.15 1376.47   1
 -10   4 -32 2423.89 1050.99   1
  -4  -6  32 2823.72 897.248   2
   6 -10 -32 5360.08 1275.58   1
 -10   4 -35 2156.16 1074.66   1
  -4  -6  35 3423.04 1089.43   2
 -10   4 -38 2203.07 1119.07   1
  -3  -7 -38 2024.81 1027.52   1
  -3  -7 -35 608.076 630.163   1
 -10   3  35 1344.12 731.051   2
 -10   3  32 723.969 581.268   2
  -3  -7 -32 478.487 563.068   1
  -3  -7 -29 16.4219 399.397   1
 -10   3  29 57.5018 361.658   2
  10  -3 -29 179.346 359.521   3
  -7  10 -26 1656.87 560.916   1
 -10   3  26 1412.80 620.155   2
  10  -3 -26 633.984 512.692   3
  -3  -7 -26 1266.72 722.208   1
  -3  -7 -23 9807.34 1393.83   1
  -7  10 -23 11122.6 1247.54   1
 -10   3  23 9428.47 1274.77   2
  10  -3 -23 9156.85 1313.94   3
  -7  10 -20 21485.7 1642.53   1
  -3  -7 -20 22409.9 1974.66   1
  10  -3 -20 22381.2 1953.48   3
  -7  10 -17 25573.3 1769.78   1
  10  -3 -17 25213.4 2017.18   3
  -3  -7 -17 24008.0 1884.55   1
  -7  10 -14 40597.0 2175.06   1
   7 -10  14 35903.1 1604.15   3
  -3  -7 -14 39422.3 2311.23   1
  -3  -7 -11 9140.89 1101.56   1
  10  -3 -11 8073.07 1061.30   3
  -7  10 -11 9965.58 1043.07   1
  -3  -7  -8 771.318 397.170   1
  -7  10  -8 473.364 316.658   1
   7 -10   5 15272.8 622.139   3
  10  -3  -5 17359.2 1500.74   3
  -3  -7  -5 17238.2 1262.05   1
  -3  -7  -2 3580.08 543.161   1
   3   7   2 3036.87 462.405   1
  10  -3  -2 3739.53 745.551   3
   7 -10   2 2934.79 257.624   3
  -7  10   1 54356.4 1370.87   3
  10  -3   1 54922.7 2728.82   3
   3   7  -1 51431.3 2294.39   3
 -10   3  -1 50358.8 2541.79   1
  -3  -7   1 50194.4 1733.56   1
   7 -10  -1 52885.2 1355.41   3
   3   7  -1 56900.3 2037.82   1
   3   7  -4 133393. 3441.96   3
  10  -3   4 129227. 4185.17   3
  -7  10   4 123266. 2348.05   3
  -3  -7   4 124869. 2373.84   1
   3   7  -4 125565. 2686.81   1
   7 -10  -4 135490. 2682.23   3
 -10   3  -4 127390. 4195.89   1
  -7  10   7 186500. 3406.77   3
 -10   3  -7 198332. 5659.81   1
   7 -10  -7 199597. 3824.43   3
  -3  -7   7 179019. 2366.44   1
  -3  -7   7 180500. 3960.98   3
   3   7  -7 192215. 4021.39   3
   3   7 -10 215038. 4377.12   3
 -10   3 -10 212072. 6133.92   1
 -10   3 -13 18791.2 1813.63   1
   3   7 -13 23451.7 1482.79   3
   3   7 -16-5.93475 247.128   3
 -10   3 -16-112.945 532.703   1
  -3  -7  19 975.133 173.762   1
   3   7 -19 112.825 293.378   3
 -10   3 -19 101.942 601.095   1
 -10   3 -22 4375.28 987.243   1
   3   7 -22 4137.83 778.559   3
  -3  -7  25-1162.37 564.356   2
   3   7 -25-257.422 380.097   3
 -10   3 -25-443.957 591.484   1
 -10   3 -28 3999.86 1205.88   1
  -3  -7  28 1660.71 671.465   2
 -10   3 -31 3410.95 1168.26   1
  -3  -7  31 3747.60 1004.30   2
  -3  -7  34 4162.61 1128.56   2
 -10   3 -34 1341.84 978.893   1
 -10   3 -37 1445.72 988.316   1
  -3  -7  37 3889.69 1121.10   2
 -10   3 -40 789.168 836.124   1
 -10   2  36 483.280 560.960   2
  -2  -8 -36 180.111 560.825   1
  -2  -8 -33 381.075 524.593   1
 -10   2  33 391.693 487.285   2
  -2  -8 -30-1042.42 671.261   1
 -10   2  30-75.3843 318.386   2
  10  -2 -30-305.338 389.719   3
  10  -2 -27 1489.38 682.487   3
  -8  10 -27 1674.94 634.709   1
 -10   2  27 1807.29 694.753   2
  -2  -8 -27 3411.19 981.621   1
  -8  10 -24 734.252 454.710   1
 -10   2  24 835.742 547.430   2
  10  -2 -24 427.589 434.952   3
  -2  -8 -21 3078.93 888.479   1
  -8  10 -21 1557.37 480.983   1
  10  -2 -21 2957.42 835.297   3
  10  -2 -18 1335.99 508.508   3
  -8  10 -18 771.035 304.448   1
  10  -2 -15 682.732 446.276   3
  -8  10 -15 2015.53 584.969   1
  10  -2 -12 15879.2 1525.30   3
  -2  -8 -12 12898.7 1185.28   1
  -8  10 -12 14365.4 1353.41   1
  10  -2  -9 49245.0 2646.69   3
  -2  -8  -9 44909.7 2210.23   1
  -8  10  -9 43513.3 2173.27   1
  10  -2  -6 47116.3 2595.28   3
   8 -10   6 44192.0 1424.52   3
  -2  -8  -6 43981.2 2024.53   1
  -2  -8  -3 25340.7 1409.67   1
   8 -10   3 25381.2 982.872   3
  10  -2  -3 27585.4 1962.49   3
 -10   2   3 25183.7 1674.81   1
  -2  -8   0 7000.03 658.139   1
   2   8   0 7766.17 721.822   1
   8 -10   0 7118.91 554.897   3
  -8  10   0 7202.35 584.109   3
  10  -2   0 6955.85 1026.24   3
 -10   2   0 6879.49 949.878   1
   2   8   0 6329.41 784.060   3
  -8  10   3 4525.04 465.366   3
   2   8  -3 5335.32 555.840   1
   8 -10  -3 5175.84 540.916   3
  -2  -8   3 4790.31 467.609   1
   2   8  -3 5118.34 653.602   3
  10  -2   3 5010.42 863.806   3
 -10   2  -3 4791.70 867.482   1
 -10   2  -6 1141.72 528.933   1
  -2  -8   6 1304.19 196.916   1
   2   8  -6 1269.92 324.215   3
   2   8  -6 1357.71 234.840   1
   8 -10  -6 1193.74 301.617   3
  -2  -8   6 1082.77 299.642   3
  -8  10   6 1228.80 291.098   3
   2   8  -9 1010.35 315.069   3
   8 -10  -9 1096.37 354.331   3
 -10   2  -9 722.156 464.875   1
  -2  -8   9 919.456 284.740   3
   2   8 -12 2118.55 425.085   3
   8 -10 -12 2108.16 495.089   3
 -10   2 -15 14316.6 1683.15   1
   2   8 -15 14632.5 1188.85   3
 -10   2 -18 4527.71 1009.49   1
   2   8 -18 3806.05 671.862   3
   2   8 -21 4267.14 782.883   3
 -10   2 -21 3736.54 1004.49   1
 -10   2 -24 4794.93 1125.80   1
  -2  -8  24 2526.49 700.616   2
 -10   2 -27 237.208 412.468   1
  -2  -8  27-487.279 443.499   2
 -10   2 -30-913.151 716.936   1
  -2  -8  30 39.0174 411.985   2
 -10   2 -33-640.216 655.190   1
  -2  -8  33 307.927 494.525   2
 -10   2 -36 96.7422 490.478   1
  -2  -8  36 240.264 449.671   2
 -10   2 -39-386.353 593.304   1
  -1  -9 -37-381.437 664.678   1
  -1  -9 -34-230.318 557.757   1
 -10   1  34-329.217 476.598   2
  10  -1 -31-186.142 403.658   3
  -1  -9 -31-418.193 559.627   1
 -10   1  31 160.448 434.037   2
  -9  10 -28 102.852 400.756   1
  -1  -9 -28 330.793 508.145   1
 -10   1  28-285.987 459.618   2
  10  -1 -28 274.851 394.101   3
  10  -1 -25 610.887 601.247   3
  -9  10 -25 886.348 547.758   1
  -1  -9 -25 735.782 628.330   1
  -1  -9 -22 2457.05 888.187   1
  -9  10 -22 1562.81 647.645   1
  10  -1 -22 1947.45 791.736   3
  10  -1 -19 27179.6 2196.99   3
  -9  10 -19 22997.5 1964.63   1
  -1  -9 -19 23172.0 1987.62   1
  -9  10 -16 66792.1 3261.28   1
  10  -1 -16 64149.3 3252.05   3
  -1  -9 -16 70454.3 3197.91   1
  -9  10 -13 111935. 4106.57   1
  -1  -9 -13 117694. 3869.25   1
  10  -1 -13 113336. 4231.49   3
  10  -1 -10 104693. 3949.69   3
  -9  10 -10 91672.3 2488.16   2
  -9  10 -10 97168.9 3478.62   1
  -1  -9 -10 98697.8 3332.61   1
  -1  -9  -7 29377.8 1701.29   1
   9 -10   7 29058.8 1343.48   3
  -9  10  -7 29064.6 1136.68   2
  -9  10  -7 28787.6 1728.84   1
  10  -1  -7 30949.8 2149.62   3
  10  -1  -4 120.747 425.517   3
  -1  -9  -4 628.289 254.121   1
   9 -10   4 399.663 157.138   3
  -9  10  -4 563.083 120.733   2
 -10   1   4 222.173 228.696   1
  -1  -9  -1 939.409 270.546   1
  10  -1  -1 843.926 443.265   3
   1   9   1 1003.16 276.006   1
   9 -10   1 886.976 235.172   3
 -10   1   1 749.713 335.683   1
 -10   1  -2 2420.64 609.991   1
   9 -10  -2 2099.00 368.775   3
   1   9  -2 2463.09 375.408   1
  10  -1   2 2089.46 596.453   3
  -9  10   2 2598.79 232.181   2
  -1  -9   2 2282.55 343.701   1
   1   9  -2 2356.32 428.892   3
   1   9  -5 8089.92 609.834   1
 -10   1  -5 6737.35 1054.10   1
   1   9  -5 7893.61 728.067   3
  -9  10   5 7369.02 677.991   3
  -9  10   5 7328.71 533.417   2
   9 -10  -5 7053.66 731.913   3
  -1  -9   5 7867.06 512.887   1
   1   9  -8 63187.7 2041.09   3
  -1  -9   8 60582.1 2158.49   3
  -9  10   8 63160.6 1928.93   2
 -10   1  -8 66702.6 3411.98   1
   9 -10  -8 63107.3 2369.35   3
  -1  -9  11 59588.5 2243.40   3
 -10   1 -11 62130.1 3346.15   1
  -9  10  11 60685.6 2199.81   2
   9 -10 -11 66236.4 2656.41   3
   1   9 -11 62624.0 2106.17   3
  -9  10  14 91818.4 2954.24   2
 -10   1 -14 94517.7 4285.93   1
   9 -10 -14 94075.3 3509.41   3
   1   9 -14 89226.6 2727.10   3
 -10   1 -17 42513.0 2961.20   1
   1   9 -17 38992.0 1985.72   3
 -10   1 -20 304.384 470.149   1
   1   9 -20 284.955 291.660   3
 -10   1 -23 810.339 619.714   1
  -1  -9  23 49.0534 349.527   2
 -10   1 -26 2765.63 923.616   1
  -1  -9  26 2424.29 686.917   2
 -10   1 -29 2022.61 783.618   1
  -1  -9  29 2324.97 710.603   2
 -10   1 -32-614.905 718.599   1
  -1  -9  32-453.373 467.481   2
 -10   1 -35-820.762 712.042   1
  -1  -9  35-144.927 445.333   2
  -1  -9  38-21.9592 371.649   2
 -10   1 -38 71.8651 583.470   1
   0 -10 -35 176.319 583.922   1
 -10   0  35-94.9521 429.767   2
   0 -10 -32 253.985 502.674   1
 -10   0  32-113.258 460.668   2
  10   0 -32-138.559 451.401   3
 -10  10 -29 3393.24 925.392   1
  10   0 -29 3132.45 900.252   3
 -10   0  29 2789.12 818.352   2
   0 -10 -29 3140.10 912.201   1
   0 -10 -26 1499.15 644.271   1
 -10  10 -26 1765.96 684.259   1
  10   0 -26 992.559 555.955   3
   0 -10 -23 400.617 418.612   1
 -10  10 -23 1117.65 527.158   1
  10   0 -23 727.570 430.064   3
   0 -10 -20 603.585 517.490   1
 -10  10 -20 780.111 432.301   1
  10   0 -20 1369.40 563.997   3
  10   0 -17 650.070 296.784   3
   0 -10 -17 179.223 559.872   1
 -10  10 -17 1324.06 552.347   1
  10   0 -14 10046.7 1294.44   3
 -10  10 -14 10055.0 1356.41   1
   0 -10 -14 8838.06 1103.73   1
  10   0 -11 10851.0 1223.06   3
 -10  10 -11 15068.2 1523.68   1
 -10  10 -11 12713.5 1035.88   2
   0 -10 -11 13964.8 1285.86   1
 -10  10  -8 797.575 378.238   1
   0 -10  -8 585.142 320.840   1
 -10  10  -8 463.658 196.303   2
   0 -10  -5 16994.8 1234.84   1
  10   0  -5 17823.7 1703.43   3
  10 -10   5 18004.9 1157.06   3
 -10   0   5 15750.6 1418.73   1
   0 -10  -2 66376.7 2254.28   1
  10 -10   2 61972.3 2088.58   3
  10   0  -2 60303.3 3164.79   3
 -10   0   2 61364.1 2896.28   1
 -10   0  -1 96915.5 3848.45   1
   0 -10   1 102721. 2481.89   1
   0  10  -1 101227. 2698.76   3
  10   0   1 102286. 4152.33   3
 -10  10   1 109668. 2800.34   3
   0  10  -1 108255. 2600.16   1
  10 -10  -1 98320.0 2687.92   3
   0 -10   4 47134.4 1378.70   1
   0  10  -4 48868.7 1656.22   3
  10 -10  -4 45620.3 1943.52   3
  10   0   4 43639.6 2731.95   3
 -10  10   4 47146.9 1819.14   3
 -10   0  -4 44985.3 2748.11   1
   0  10  -4 48919.1 1537.11   1
   0  10  -7 2368.00 351.150   3
   0  10  -7 1939.00 235.334   1
  10 -10  -7 2514.77 498.106   3
 -10  10   7 2339.55 374.567   2
   0 -10  10 5037.96 625.319   3
 -10   0 -10 4877.38 965.172   1
 -10  10  10 5938.73 673.224   2
  10 -10 -10 4854.19 686.709   3
   0  10 -10 5078.29 569.228   3
  10 -10 -13 3516.70 668.270   3
 -10   0 -13 2892.33 781.292   1
 -10  10  13 2870.50 489.413   2
   0  10 -13 3158.96 505.998   3
   0  10 -16 9042.67 907.818   3
 -10  10  16 8915.47 995.373   2
  10 -10 -16 9734.82 1151.97   3
 -10   0 -16 9306.06 1405.60   1
  10 -10 -19 1249.82 554.215   3
 -10   0 -19-220.984 640.499   1
 -10  10  19 817.034 411.668   2
 -10  10  22 5865.54 947.332   2
   0 -10  22 6032.14 950.468   2
 -10   0 -22 6515.04 1243.07   1
 -10   0 -25 490.585 500.274   1
   0 -10  25 619.612 445.619   2
   0 -10  28 1549.35 656.703   2
 -10   0 -28 2298.75 939.578   1
 -10   0 -31 969.905 792.239   1
   0 -10  31 1201.71 569.274   2
   0 -10  34-332.982 455.202   2
 -10   0 -34-543.077 676.955   1
   0 -10  37-29.3692 371.985   2
 -10   0 -37-10.3834 513.215   1
   1 -11  36 2379.29 943.921   2
 -10  -1 -36 2294.79 1249.18   1
 -10  -1 -33 792.501 917.156   1
   1 -11  33 1923.22 798.995   2
 -10  -1 -30 2207.57 992.299   1
   1 -11  30 2789.39 831.202   2
 -10  -1 -27 4427.28 1268.94   1
   1 -11  27 3189.25 815.522   2
 -11  10  24 17145.3 1721.22   2
   1 -11  24 15583.0 1619.82   2
 -11  10  21 20992.5 1797.05   2
   1 -11  21 20590.5 1733.55   2
 -10  -1 -21 23950.9 2414.30   1
  11 -10 -21 25057.2 2160.99   3
 -11  10  18 47197.6 2476.22   2
 -10  -1 -18 55205.2 3498.18   1
  11 -10 -18 51725.2 2902.43   3
 -10  -1 -15 75576.0 3961.65   1
 -11  10  15 70837.9 2857.03   2
  -1  11 -15 74446.2 2468.25   3
  11 -10 -15 73962.8 3265.10   3
   1 -11  12 52330.2 2012.68   3
  -1  11 -12 57485.7 1927.23   3
 -10  -1 -12 60321.9 3414.92   1
 -11  10  12 55452.1 2278.62   2
  11 -10 -12 60170.5 2755.72   3
  11 -10  -9 106491. 3515.70   3
   1 -11   9 97083.8 2524.54   3
  -1  11  -9 99248.5 2283.39   3
 -11  10   9 102348. 2759.24   2
  -1  11  -6 97260.8 1914.24   1
  -1  11  -6 93850.3 2008.63   3
  11 -10  -6 91382.7 3069.29   3
 -10  -1  -6 92769.0 3990.42   1
  11 -10  -3 118323. 3339.65   3
  -1  11  -3 126084. 2441.26   3
  10   1   3 116518. 4585.97   3
  -1  11  -3 124834. 2650.23   1
 -10  -1  -3 114239. 4355.44   1
  -1  11   0 195593. 3594.35   3
 -10  -1   0 195309. 5581.60   1
   1 -11   0 208069. 3772.16   1
  -1  11   0 211121. 3897.82   1
  11 -10   0 195474. 4157.74   3
  10   1   0 206875. 6046.27   3
  11 -10   3 287879. 4993.98   3
  10   1  -3 295892. 7081.99   3
 -10  -1   3 287907. 6390.04   1
  10   1  -6 350165. 7757.32   3
 -10  -1   6 312110. 6448.71   1
 -11  10  -6 295795. 6050.32   1
   1 -11  -6 330663. 5712.90   1
  11 -10   6 325239. 5400.31   3
   1 -11  -9 277763. 5674.07   1
  10   1  -9 270221. 6821.54   3
 -10  -1   9 261725. 5635.46   1
 -11  10  -9 267190. 6203.73   1
   1 -11 -12 164348. 4630.93   1
 -11  10 -12 162036. 5216.38   1
  10   1 -12 150984. 5062.96   3
   1 -11 -15 41177.9 2482.42   1
  10   1 -15 38362.9 2583.04   3
 -11  10 -15 33507.3 2579.19   1
 -11  10 -18 17637.0 2011.47   1
   1 -11 -18 17634.0 1723.67   1
  10   1 -18 15658.2 1729.31   3
 -11  10 -21 1843.49 719.501   1
  10   1 -21 2236.99 757.455   3
   1 -11 -21 1522.85 642.355   1
 -11  10 -24 150.779 365.059   1
  10   1 -24 942.985 637.981   3
   1 -11 -24 276.058 512.999   1
  10   1 -27 5683.32 1190.04   3
   1 -11 -27 4989.69 1137.97   1
 -11  10 -27 6222.15 1302.99   1
 -11  10 -30 5221.69 1313.92   1
  10   1 -30 5474.60 1238.20   3
   1 -11 -30 7969.64 1566.34   1
 -10  -1  30 3769.00 1022.14   2
 -10  -1  33 4020.57 1096.80   2
   1 -11 -33 6768.52 1508.31   1
  10   1 -33 5113.91 1288.64   3
   1 -11 -36 3995.55 1284.75   1
  -9  -2 -37 1382.16 893.573   1
  -9  -2 -34-58.2047 597.354   1
  -9  -2 -31 1187.52 935.491   1
   2 -11  31 2145.45 730.144   2
  -9  -2 -28 1339.21 725.244   1
 -11   9  28 1229.46 567.620   2
   2 -11  28 950.038 520.714   2
  -9  -2 -25 1474.51 719.066   1
 -11   9  25 1732.50 613.753   2
   2 -11  25 956.050 436.285   2
  -9  -2 -22 15321.5 1924.47   1
 -11   9  22 11509.1 1380.00   2
   2 -11  22 9732.12 1189.87   2
  11  -9 -22 13226.4 1604.91   3
  11  -9 -19 8698.13 1236.26   3
 -11   9  19 8311.51 1142.19   2
   2 -11  19 7552.98 994.013   2
  -9  -2 -19 11923.8 1650.58   1
 -11   9  16 4831.56 827.021   2
  11  -9 -16 5941.68 1011.16   3
   2 -11  13 15850.9 1085.13   3
  11  -9 -13 19752.5 1656.63   3
  -9  -2 -13 15758.6 1684.90   1
 -11   9  13 16471.6 1307.76   2
  11  -9 -10 22091.6 1680.79   3
  -9  -2 -10 23424.9 2007.90   1
  -2  11 -10 20757.8 971.767   3
   2 -11  10 20161.9 1064.60   3
  -2  11  -7 35730.4 1060.52   1
  -9  -2  -7 34045.3 2359.70   1
  11  -9  -7 35648.1 1990.44   3
  -2  11  -7 33352.1 1047.32   3
  -2  11  -4 64283.5 1334.56   3
  -9  -2  -4 59302.9 3008.97   1
  11  -9  -4 60955.0 2499.68   3
  -2  11  -4 66217.2 1796.55   1
  11  -9  -1 120099. 3405.06   3
  -2  11  -1 127427. 2817.18   1
   9   2   1 126370. 4650.83   3
  -2  11  -1 127630. 2280.22   3
   9   2  -2 128552. 4598.04   3
  11  -9   2 125255. 3471.28   3
  -9  -2   2 126988. 4166.33   1
   2 -11  -2 136358. 3252.91   1
  -9  -2   5 95590.6 3448.74   1
  11  -9   5 96538.9 3071.17   3
   2 -11  -5 96424.9 3006.74   1
 -11   9  -5 88641.9 3232.25   1
   9   2  -5 96989.1 3992.16   3
   9   2  -8 81293.1 3575.80   3
   2 -11  -8 82263.4 3001.34   1
  -9  -2   8 79533.1 3038.55   1
 -11   9  -8 77262.6 3315.21   1
   2 -11 -11 63549.1 2776.55   1
   9   2 -11 57424.3 3010.83   3
 -11   9 -11 60834.1 3167.90   1
   2 -11 -14 19060.8 1665.37   1
   9   2 -14 21713.5 1895.15   3
 -11   9 -14 20431.3 2023.65   1
   9   2 -17 5272.04 998.523   3
   2 -11 -17 6092.69 1041.35   1
 -11   9 -20 12217.8 1656.47   1
   2 -11 -20 12290.1 1485.81   1
   9   2 -20 12073.7 1499.54   3
   2 -11 -23 1913.53 709.085   1
   9   2 -23 1659.61 666.459   3
 -11   9 -23 1027.66 546.323   1
   9   2 -26-190.833 417.205   3
 -11   9 -26-104.905 453.612   1
   2 -11 -26 221.309 414.270   1
   9   2 -29 1912.25 774.386   3
   2 -11 -29 1532.79 773.990   1
  -9  -2  29 1131.02 587.514   2
 -11   9 -29 1608.43 673.373   1
 -11   9 -32 2702.43 1089.27   1
  -9  -2  32 1967.07 775.644   2
   9   2 -32 3382.59 1004.65   3
   2 -11 -32 3979.33 1177.66   1
   2 -11 -35 3052.83 1135.12   1
  -9  -2  35 1512.49 835.686   2
  -8  -3 -35-1719.63 928.372   1
 -11   8  32 11.8131 355.528   2
  -8  -3 -32-1150.39 773.949   1
   3 -11  29 1402.28 558.087   2
 -11   8  29 868.082 481.720   2
  -8  -3 -29 576.271 581.179   1
  -8  -3 -26 337.593 506.083   1
   3 -11  26 1002.62 413.981   2
 -11   8  26 1414.94 617.090   2
  11  -8 -26 465.677 427.078   3
  -8  -3 -23 507.469 529.328   1
   3 -11  23 176.054 405.572   2
 -11   8  23 1493.51 587.392   2
  11  -8 -23 1943.94 715.906   3
  -8  -3 -20 912.733 589.306   1
  11  -8 -20 293.870 408.168   3
 -11   8  20-2.82612 394.356   2
   3 -11  20-287.850 388.217   2
 -11   8  17 28895.8 1938.04   2
  11  -8 -17 33244.5 2279.30   3
  -8  -3 -17 32135.2 2463.97   1
   3 -11  17 30997.5 1843.73   2
  11  -8 -14 71727.1 3160.67   3
  -8  -3 -14 67804.4 3409.32   1
   3 -11  14 68901.9 2476.70   2
   3 -11  14 63664.7 2199.89   3
   3 -11  11 43965.2 1520.06   3
  11  -8 -11 45422.5 2413.46   3
  -8  -3 -11 45862.4 2730.19   1
   3 -11   8 26329.8 947.605   3
  -8  -3  -8 27197.0 2050.14   1
  11  -8  -8 28512.6 1847.93   3
  -3  11  -8 27779.6 915.191   1
  -8  -3  -5 2919.57 689.855   1
  11  -8  -5 3249.40 620.408   3
  -3  11  -5 3030.34 360.206   1
  -8  -3  -2 58815.0 2792.89   1
   8   3   2 58146.8 3079.38   3
  11  -8  -2 59568.2 2508.73   3
  -3  11  -2 59866.6 1849.29   1
  -3  11  -2 55112.3 933.807   3
  -8  -3   1 19278.8 1568.01   1
  11  -8   1 18561.7 1399.03   3
   8   3  -1 18783.7 1746.02   3
   3 -11  -4 3445.13 535.661   1
 -11   8  -4 3100.86 635.605   1
  -8  -3   4 4324.01 742.452   1
  11  -8   4 3961.38 662.805   3
   8   3  -7 55.4856 318.419   3
   3 -11  -7-63.7457 280.294   1
 -11   8  -7 202.748 285.247   1
  -8  -3   7 261.226 232.550   1
   8   3 -10 80276.5 3409.30   3
 -11   8 -10 74067.5 3475.32   1
   3 -11 -10 78211.8 3021.04   1
  -8  -3  10 80623.4 2875.49   1
   8   3 -13 64847.5 3107.82   3
   3 -11 -13 64974.8 2963.93   1
 -11   8 -13 64290.2 3483.42   1
 -11   8 -16 33321.0 2573.90   1
   3 -11 -16 34036.9 2248.42   1
   8   3 -16 30710.4 2166.82   3
   8   3 -19 17830.6 1754.13   3
 -11   8 -19 16774.7 1898.98   1
   3 -11 -19 21124.8 1869.71   1
 -11   8 -22-489.312 730.022   1
   3 -11 -22 151.889 432.110   1
   8   3 -22 494.501 364.519   3
   8   3 -25 3303.05 828.008   3
 -11   8 -25 4191.92 1030.13   1
   3 -11 -25 3722.12 962.367   1
 -11   8 -28 3176.38 988.672   1
  -8  -3  28 2189.33 713.534   2
   8   3 -28 2542.13 783.151   3
   3 -11 -28 2005.71 808.130   1
 -11   8 -31 369.208 446.486   1
   3 -11 -31 870.293 636.630   1
  -8  -3  31 243.024 410.921   2
   8   3 -31 366.031 449.216   3
 -11   8 -34-336.010 646.481   1
   3 -11 -34 204.021 474.325   1
  -8  -3  34-735.247 581.592   2
   3 -11 -37-829.246 676.779   1
  -7  -4 -36-88.3056 503.129   1
  -7  -4 -33-1072.83 733.794   1
 -11   7  33-567.411 545.067   2
  -7  -4 -30-852.687 692.801   1
 -11   7  30-390.345 457.308   2
  -7  -4 -27 593.850 577.080   1
   4 -11  27 771.076 436.961   2
 -11   7  27 944.649 487.804   2
  11  -7 -27 421.690 496.528   3
  -7  -4 -24 1210.81 672.703   1
  11  -7 -24 1039.10 601.588   3
   4 -11  24 618.796 392.325   2
 -11   7  24 725.537 528.242   2
   4 -11  21 3025.18 655.020   2
 -11   7  21 2063.72 433.929   2
  -7  -4 -21 3792.42 989.955   1
  11  -7 -21 3914.84 916.234   3
  -7  -4 -18 21813.9 2071.47   1
  -4  11 -18 19591.6 875.045   1
  11  -7 -18 22772.1 1939.90   3
   4 -11  18 20450.4 1514.16   2
 -11   7  18 17502.0 1524.07   2
  -4  11 -15 84418.3 1738.98   1
  -7  -4 -15 89832.7 3950.80   1
   4 -11  15 91500.9 2851.20   2
  11  -7 -15 95424.6 3737.10   3
   4 -11  15 85482.7 2652.79   3
  -4  11 -12 40509.2 1334.99   1
  11  -7 -12 40394.5 2342.29   3
   4 -11  12 40085.1 1499.17   3
   4 -11  12 39859.1 1714.88   2
  -7  -4 -12 40798.1 2506.27   1
   4 -11   9 21104.9 815.997   3
  -4  11  -9 21585.8 876.220   1
  -7  -4  -9 24135.1 1837.57   1
  -4  11  -9 23707.8 1097.81   1
  11  -7  -9 23941.8 1732.10   3
  -4  11  -6 5179.49 475.084   1
  -7  -4  -6 4919.71 825.670   1
  11  -7  -6 6077.36 863.834   3
  11  -7  -3 12231.9 1186.30   3
  -4  11  -3 10862.5 782.437   1
  -7  -4  -3 10826.1 1166.40   1
  -7  -4   0 6313.37 849.985   1
  -4  11   0 6259.26 660.116   1
   7   4   0 6728.13 1033.34   3
  11  -7   0 6347.29 858.144   3
  -4  11   3 179.136 102.221   3
  -7  -4   3 238.074 185.872   1
  11  -7   3 122.417 170.776   3
   7   4  -3 244.563 235.232   3
 -11   7  -3 124.344 228.265   1
  -7  -4   6 4255.37 660.967   1
   7   4  -6 3630.79 694.408   3
  -4  11   6 4224.87 503.278   3
 -11   7  -6 4451.66 803.381   1
  11  -7   6 3994.13 699.323   3
   4 -11  -6 3401.68 542.728   1
  -7  -4   9 32651.8 1728.21   1
   4 -11  -9 31661.9 1867.74   1
 -11   7  -9 31521.4 2259.49   1
   7   4  -9 34047.5 2149.79   3
  -7  -4  12 76221.7 2585.22   1
 -11   7 -12 74252.2 3729.61   1
   7   4 -12 75987.1 3189.16   3
   4 -11 -12 75940.4 3080.82   1
   4 -11 -15 41195.8 2377.18   1
 -11   7 -15 37173.4 2740.07   1
   7   4 -15 35455.2 2240.03   3
 -11   7 -18 22269.3 2189.34   1
   4 -11 -18 24810.1 1982.85   1
   7   4 -18 22027.2 1817.11   3
   7   4 -21 7327.78 1111.64   3
   4 -11 -21 10284.3 1354.80   1
 -11   7 -21 8324.18 1391.88   1
   4 -11 -24 321.287 578.432   1
 -11   7 -24-186.750 594.874   1
   4 -11 -27-95.4183 407.852   1
  -7  -4  27-680.721 559.479   2
   7   4 -27-1480.45 628.920   3
 -11   7 -27-975.534 649.534   1
 -11   7 -30 18.7647 657.246   1
   4 -11 -30 192.424 398.352   1
  -7  -4  30 475.124 499.999   2
   7   4 -30 322.962 370.494   3
  -7  -4  33-1167.35 651.182   2
 -11   7 -33-1240.54 768.780   1
   4 -11 -33 97.5185 412.614   1
   4 -11 -36-808.109 665.639   1
 -11   7 -36-120.664 522.199   1
  -7  -4  36-68.6562 422.432   2
 -11   6  37 172.032 468.925   2
  -6  -5 -37 1515.25 1070.44   1
 -11   6  34 1229.17 635.855   2
  -6  -5 -34 1295.53 976.908   1
 -11   6  31 439.128 500.365   2
  -6  -5 -31 1499.74 949.990   1
  -6  -5 -28 1820.13 834.913   1
 -11   6  28 668.869 463.138   2
  11  -6 -28 1299.00 632.570   3
  11  -6 -25-869.028 713.612   3
  -6  -5 -25-172.653 516.520   1
 -11   6  25-984.110 600.376   2
   5 -11  22 6610.92 913.038   2
  11  -6 -22 7615.72 1216.25   3
 -11   6  22 4592.82 813.135   2
  -6  -5 -22 6022.61 1110.02   1
  -5  11 -22 7476.11 770.645   1
  -5  11 -19 4346.25 537.747   1
  -6  -5 -19 3155.36 622.653   1
   5 -11  19 3551.26 607.843   2
 -11   6  19 2164.86 493.354   2
  11  -6 -19 4737.07 933.951   3
  11  -6 -16 741.833 442.698   3
   5 -11  16-216.946 329.749   2
   5 -11  16 175.170 155.148   3
  -5  11 -16 660.307 220.325   1
   5 -11  13 741.343 203.914   3
  -6  -5 -13 441.093 429.048   1
  -5  11 -13 1099.10 275.741   1
   5 -11  13 614.598 210.191   2
  11  -6 -13 365.062 317.434   3
   5 -11  10 45301.3 1306.97   3
  11  -6 -10 45698.4 2472.04   3
  -5  11 -10 42782.9 1727.29   1
   5 -11  10 42199.8 1564.02   2
  -6  -5 -10 47839.0 2524.21   1
  11  -6  -7 134242. 4089.64   3
  -6  -5  -7 145475. 4163.71   1
  -5  11  -4 57295.0 1810.92   1
  11  -6  -4 60017.2 2734.16   3
  -6  -5  -4 60019.0 2579.02   1
   6   5   1 1955.83 585.262   3
  -5  11  -1 1998.10 385.422   1
  -6  -5  -1 1869.95 400.535   1
  11  -6  -1 1183.20 320.193   3
   6   5  -2 9705.36 945.137   1
   6   5  -2 8728.50 1106.82   3
  -6  -5   2 9171.10 939.916   1
  11  -6   2 8971.57 1072.78   3
  -5  11   2 8815.08 483.417   3
  -5  11   5 1150.20 243.587   3
   6   5  -5 1089.81 294.777   3
  -6  -5   5 1112.97 329.992   1
  11  -6   5 1032.53 393.809   3
 -11   6  -5 1252.74 509.431   1
 -11   6  -8-394.680 575.267   1
   6   5  -8 167.973 266.077   3
   5 -11  -8 218.589 107.424   2
  -6  -5   8 16.0617 181.824   1
   6   5 -11 11347.2 1247.23   3
 -11   6 -11 10574.2 1407.27   1
  -6  -5  11 10286.7 885.591   1
   5 -11 -11 12057.5 1237.13   1
   5 -11 -14 24876.2 1832.76   1
  -6  -5  14 20332.6 985.711   1
   6   5 -14 25534.9 1821.43   3
 -11   6 -14 23926.7 2212.44   1
  -6  -5  14 24275.8 1336.81   1
   5 -11 -17 16498.7 1584.02   1
 -11   6 -17 13514.4 1733.78   1
   6   5 -17 14005.8 1431.58   3
  -6  -5  17 13293.1 855.034   1
   5 -11 -20 4262.45 856.111   1
   6   5 -20 4488.81 821.059   3
 -11   6 -20 4861.88 1081.65   1
   5 -11 -23 1813.18 716.426   1
 -11   6 -23 1377.58 578.112   1
   6   5 -23 2151.58 612.773   3
   5 -11 -26 227.267 449.005   1
   6   5 -26-202.840 406.315   3
  -6  -5  26-218.129 475.956   2
 -11   6 -26-1102.83 691.650   1
   5 -11 -29 188.650 470.562   1
 -11   6 -29-814.296 843.906   1
  -6  -5  29 245.299 391.500   2
   6   5 -29 825.052 483.120   3
 -11   6 -32-442.141 656.695   1
  -6  -5  32-804.018 581.697   2
   5 -11 -32-332.072 525.286   1
 -11   6 -35 186.414 603.604   1
  -6  -5  35 68.1590 410.119   2
   5 -11 -35 613.511 621.878   1
 -11   6 -38 250.032 597.697   1
 -11   5  35 5684.98 1315.12   2
  -5  -6 -35 9925.66 1884.73   1
 -11   5  32 6555.75 1366.25   2
  -5  -6 -32 7086.01 1475.13   1
  -5  -6 -29 9958.91 1708.72   1
 -11   5  29 6875.08 1291.83   2
  11  -5 -29 9257.79 1560.61   3
 -11   5  26 8411.92 1336.18   2
  11  -5 -26 12468.5 1688.49   3
  -5  -6 -26 14888.6 1901.04   1
  11  -5 -23 288.619 367.348   3
  -6  11 -23 264.863 237.125   1
  -5  -6 -20 1488.45 672.760   1
  -6  11 -20 3238.72 594.962   1
  11  -5 -20 4052.68 917.724   3
  -5  -6 -17 13913.8 1517.87   1
  -6  11 -17 17473.2 1266.02   1
  11  -5 -17 18919.3 1749.91   3
  -5  -6 -14 36799.9 2340.95   1
   6 -11  14 36847.7 1628.43   3
   6 -11  14 37659.1 1654.97   2
  -6  11 -14 38597.0 1863.31   1
  11  -5 -14 38924.4 2395.12   3
   6 -11  11 114113. 2598.80   2
  -6  11 -11 118002. 3223.77   1
  -5  -6 -11 131774. 4215.48   1
   6 -11  11 117856. 2351.71   3
  11  -5 -11 126933. 4228.69   3
  11  -5  -8 363353. 7049.02   3
   6 -11   8 346583. 3756.81   2
  -5  -6  -8 383370. 6668.35   1
  11  -5  -5 391708. 7236.45   3
  -5  -6  -5 386468. 6330.83   1
  11  -5  -2 378268. 7046.48   3
  -5  -6  -2 378359. 5882.38   1
   5   6  -1 548499. 6948.30   1
   5   6  -1 473394. 7920.71   3
  11  -5   1 544200. 8422.87   3
  -5  -6   1 501323. 6341.71   1
 -11   5  -1 472492. 7543.77   1
 -11   5  -4 206373. 5418.41   1
  -5  -6   4 201653. 3843.61   1
  11  -5   4 226464. 5463.04   3
  -6  11   4 210467. 2909.37   3
   6 -11  -4 200388. 2416.35   2
   5   6  -4 230746. 4181.39   1
   5   6  -4 212864. 5006.56   3
   5   6  -7 156321. 4245.79   3
  -5  -6   7 148574. 3066.26   1
   6 -11  -7 146257. 2650.05   2
 -11   5  -7 153784. 4970.50   1
  -6  11   7 153496. 3044.26   3
 -11   5 -10 129183. 4870.95   1
   5   6 -10 124173. 3761.56   3
   6 -11 -10 114039. 2780.16   2
  -5  -6  10 114256. 2571.72   1
 -11   5 -13 70020.2 3710.16   1
  -5  -6  13 57868.3 1799.13   1
   5   6 -13 63353.9 2720.73   3
 -11   5 -16 72507.3 3857.03   1
  -5  -6  16 67920.7 1951.57   1
   6 -11 -16 69676.0 3178.63   1
   5   6 -16 68173.2 2928.42   3
   5   6 -19 37150.8 2250.64   3
 -11   5 -19 33060.2 2780.60   1
   6 -11 -19 35771.3 2418.59   1
 -11   5 -22 9967.67 1592.60   1
   6 -11 -22 11721.2 1470.67   1
   5   6 -22 11322.9 1321.99   3
 -11   5 -25 13713.7 1949.06   1
   6 -11 -25 16168.2 1799.04   1
   5   6 -25 11088.5 1408.55   3
 -11   5 -28 2467.08 1027.00   1
   5   6 -28 2558.05 835.957   3
   6 -11 -28 3555.90 1085.14   1
  -5  -6  28 1533.22 736.637   2
   6 -11 -31 2046.27 849.583   1
  -5  -6  31 1688.21 809.146   2
 -11   5 -31 1237.96 907.980   1
  -5  -6  34 4792.51 1204.89   2
   6 -11 -34 4773.81 1285.73   1
 -11   5 -34 2768.51 1234.69   1
 -11   5 -37 2354.81 1263.87   1
  -5  -6  37 2861.46 1075.07   2
 -11   4  36 4496.37 1225.88   2
  -4  -7 -36 4492.53 1424.83   1
  -4  -7 -33 5909.49 1424.24   1
 -11   4  33 3413.74 1052.13   2
  -4  -7 -30 4394.16 1301.81   1
 -11   4  30 2089.66 870.487   2
  11  -4 -30 3867.97 1082.49   3
  -4  -7 -27 6339.20 1363.61   1
 -11   4  27 3658.68 948.232   2
  11  -4 -27 5593.34 1285.47   3
  -7  11 -24 10717.9 1232.69   1
 -11   4  24 9917.16 1393.23   2
  -4  -7 -24 14035.5 1818.64   1
  11  -4 -24 9737.30 1444.08   3
  11  -4 -21 20740.5 1993.03   3
  -4  -7 -21 21277.1 2039.77   1
  -7  11 -21 19526.2 1542.82   1
  11  -4 -18 55370.6 3069.29   3
  -7  11 -18 52493.3 2475.51   1
  -4  -7 -18 54037.9 3017.34   1
  -7  11 -15 52816.6 2437.42   1
  -4  -7 -15 48578.1 2763.19   1
   7 -11  15 44692.1 1856.57   3
  11  -4 -15 54237.9 2925.32   3
  11  -4 -12 132435. 4486.33   3
   7 -11  12 118668. 2586.01   3
  -7  11 -12 126289. 3695.24   1
  -4  -7 -12 130634. 4271.39   1
  11  -4  -9 203998. 5392.67   3
  -4  -7  -9 197720. 4810.70   1
  -7  11  -9 179597. 4102.80   1
   7 -11   9 177445. 2514.40   3
  -4  -7  -6 200195. 4544.29   1
  11  -4  -6 201641. 5370.19   3
  11  -4  -3 487991. 8309.05   3
  -4  -7  -3 502397. 6653.03   1
   4   7   0 524403. 6830.34   1
   4   7   0 426393. 7321.57   3
  -4  -7   0 470434. 5898.42   1
 -11   4   0 450266. 7486.29   1
  11  -4   0 492083. 8301.31   3
 -11   4  -3 325040. 6799.03   1
   4   7  -3 314532. 5974.44   3
  -4  -7   3 308441. 4390.21   1
   4   7  -3 314319. 4813.71   1
  -7  11   3 307359. 3427.91   3
  -7  11   6 348213. 4414.63   3
 -11   4  -6 366181. 7730.11   1
   4   7  -6 357067. 6124.52   3
  -4  -7   6 340233. 4060.08   1
   4   7  -9 241356. 4941.78   3
 -11   4  -9 252105. 6811.06   1
  -4  -7  12 96075.2 1632.05   1
   4   7 -12 108643. 3406.40   3
 -11   4 -12 113821. 4743.18   1
   4   7 -15 45798.3 2271.47   3
 -11   4 -15 49218.3 3187.08   1
   4   7 -18 17421.2 1484.18   3
  -4  -7  18 15065.2 641.839   1
  -4  -7  18 15092.6 734.448   1
 -11   4 -21 7932.30 1426.19   1
   4   7 -21 6589.85 1021.27   3
   4   7 -24 6021.56 1029.78   3
 -11   4 -24 7322.59 1437.80   1
   4   7 -27 12732.6 1566.14   3
  -4  -7  27 12241.5 1598.76   2
 -11   4 -27 16008.2 2204.26   1
 -11   4 -30 11323.2 1964.30   1
  -4  -7  30 9863.25 1546.03   2
  -4  -7  33 9868.84 1622.97   2
 -11   4 -33 6951.48 1764.74   1
 -11   4 -36 6196.59 1784.04   1
  -4  -7  36 5766.88 1336.30   2
 -11   4 -39 2689.44 1428.38   1
  -3  -8 -37 431.107 641.072   1
  -3  -8 -34 198.358 518.046   1
 -11   3  34 382.365 529.238   2
  11  -3 -31 758.950 574.286   3
  -3  -8 -31 375.717 476.301   1
 -11   3  31 288.448 518.551   2
 -11   3  28-137.827 427.060   2
  11  -3 -28-151.054 478.887   3
  -3  -8 -28-479.932 513.378   1
  11  -3 -25-174.609 468.361   3
  -3  -8 -25-809.317 567.632   1
  -8  11 -25-463.301 450.583   1
 -11   3  25-346.717 389.413   2
  -8  11 -22-119.328 285.756   1
  11  -3 -22-172.029 471.560   3
  -3  -8 -22-87.2527 435.149   1
  -3  -8 -19 2799.15 689.454   1
  -8  11 -19 2907.69 663.338   1
  11  -3 -19 3954.89 904.372   3
  -8  11 -16 48182.5 2550.77   1
  -3  -8 -16 46784.8 2706.59   1
  11  -3 -16 51083.7 2927.77   3
  -8  11 -13 30240.0 2001.15   1
  -3  -8 -13 29861.7 2049.29   1
  11  -3 -13 33293.5 2317.43   3
  -8  11 -10 12896.8 1217.16   1
  11  -3 -10 15254.2 1567.87   3
  -3  -8 -10 11304.0 1204.25   1
   8 -11   7 38052.9 1205.47   3
  11  -3  -7 41849.6 2547.88   3
  -3  -8  -7 37445.7 2010.19   1
   8 -11   4 1133.08 185.276   3
  11  -3  -4 446.075 326.642   3
  -3  -8  -4 1344.59 391.847   1
 -11   3   1 1820.73 603.623   1
  11  -3  -1 810.673 431.901   3
   3   8   1 1078.88 238.498   1
   3   8   1 231.185 426.067   3
  -3  -8  -1 1145.61 363.841   1
   8 -11   1 960.678 187.112   3
   3   8  -2 81903.3 2505.72   1
  -8  11   2 76973.2 1826.65   3
   3   8  -2 73599.5 2812.32   3
 -11   3  -2 76565.3 3336.08   1
  11  -3   2 78684.8 3468.29   3
   8 -11  -2 74984.0 1869.73   3
  -3  -8   2 73247.8 2141.33   1
  -8  11   5 150170. 2858.60   3
   3   8  -5 150753. 2982.97   1
   3   8  -5 156410. 3846.40   3
  11  -3   5 149916. 4828.90   3
  -3  -8   5 148878. 2587.50   1
   8 -11  -5 154876. 3191.43   3
 -11   3  -5 152401. 5031.26   1
   3   8  -8 112476. 3176.72   3
 -11   3  -8 112161. 4664.51   1
  -3  -8   8 105980. 1693.00   1
   8 -11  -8 117285. 3147.30   3
   3   8 -11 30377.5 1689.86   3
 -11   3 -11 29464.0 2435.70   1
   3   8 -14 5731.94 779.253   3
 -11   3 -14 5668.86 1111.69   1
   3   8 -17 468.440 297.547   3
 -11   3 -17-777.213 902.353   1
 -11   3 -20 314.616 571.053   1
   3   8 -20 501.557 296.080   3
   3   8 -23 26.8398 269.482   3
 -11   3 -23-84.9077 494.155   1
 -11   3 -26 1482.81 777.903   1
  -3  -8  26 1090.41 569.087   2
  -3  -8  29 3779.11 942.961   2
 -11   3 -29 4761.10 1328.99   1
 -11   3 -32 3063.63 1164.09   1
  -3  -8  32 3057.99 937.508   2
  -3  -8  35 2984.93 977.387   2
 -11   3 -35 2498.87 1265.94   1
 -11   3 -38 1280.10 1027.59   1
 -11   2  35-8.68787 421.276   2
  -2  -9 -35-1386.21 780.191   1
  -2  -9 -32-669.380 698.485   1
 -11   2  32-420.111 543.619   2
  11  -2 -32-75.4910 365.033   3
 -11   2  29 493.413 467.516   2
  11  -2 -29 60.3558 397.121   3
  -9  11 -26-403.152 469.969   1
  -2  -9 -26-1499.99 716.717   1
 -11   2  26 49.0207 376.595   2
  11  -2 -26-982.918 540.664   3
  -2  -9 -23 434.870 527.966   1
  -9  11 -23-646.051 537.752   1
  11  -2 -23-62.1252 321.230   3
  11  -2 -20 14805.8 1695.33   3
  -9  11 -20 13326.5 1493.11   1
  -2  -9 -20 16721.3 1768.31   1
  -9  11 -17 22548.9 1893.48   1
  -2  -9 -17 22704.7 1928.64   1
  11  -2 -17 22428.4 2001.02   3
  -2  -9 -14 18234.3 1621.22   1
  -9  11 -14 16949.1 1630.44   1
  11  -2 -14 17454.9 1717.86   3
  -9  11 -11 59093.6 2799.99   1
  -2  -9 -11 56466.3 2702.98   1
  11  -2 -11 61587.5 3191.08   3
  11  -2  -8 21825.5 1898.93   3
   9 -11   8 20343.1 1061.93   3
  -2  -9  -8 20062.8 1504.80   1
  -9  11  -8 18420.7 1406.97   1
  11  -2  -5 542.729 318.126   3
   9 -11   5 846.281 188.625   3
  -2  -9  -5 552.164 219.965   1
  11  -2  -2 337.464 353.316   3
  -2  -9  -2 196.200 156.723   1
 -11   2   2 92.7275 265.503   1
   9 -11   2 357.272 144.126   3
   9 -11  -1 11677.2 784.814   3
   2   9  -1 12401.7 950.480   1
   2   9  -1 12050.3 1103.41   3
  11  -2   1 11898.1 1420.64   3
  -9  11   1 13266.4 837.353   3
  -2  -9   1 12148.1 882.187   1
 -11   2  -1 11467.5 1313.37   1
   9 -11  -4 4887.97 576.717   3
   2   9  -4 5705.63 597.834   1
  -2  -9   4 4491.18 466.146   1
   2   9  -4 5052.71 658.654   3
  11  -2   4 5401.45 959.883   3
  -9  11   4 5034.93 527.119   3
 -11   2  -4 4205.97 873.891   1
   2   9  -7 6194.94 718.832   3
   9 -11  -7 6723.24 755.726   3
  -2  -9   7 5140.17 677.521   3
  -2  -9   7 5960.75 393.143   1
 -11   2  -7 6357.58 1107.40   1
 -11   2 -10 17675.6 1875.00   1
   9 -11 -10 17173.6 1338.73   3
   2   9 -10 16914.7 1173.05   3
   9 -11 -13 37486.5 2159.13   3
 -11   2 -13 42644.5 2932.03   1
   2   9 -13 38492.9 1859.55   3
   2   9 -16 45273.0 2149.71   3
 -11   2 -16 46107.3 3172.97   1
 -11   2 -19 16532.4 1995.55   1
   2   9 -19 16105.3 1409.00   3
   2   9 -22 1209.24 474.359   3
 -11   2 -22 1576.74 741.636   1
 -11   2 -25-364.380 587.797   1
  -2  -9  25 290.640 457.974   2
 -11   2 -28-700.999 659.235   1
  -2  -9  28 1077.76 544.513   2
 -11   2 -31-73.4250 559.102   1
  -2  -9  31 352.912 442.211   2
 -11   2 -34-59.1852 564.606   1
  -2  -9  34 350.711 507.990   2
 -11   2 -37 204.645 657.551   1
  -2  -9  37 337.288 524.419   2
  -1 -10 -36-1801.93 896.787   1
  -1 -10 -33-1380.38 775.206   1
 -11   1  33-210.147 485.748   2
  11  -1 -33-217.866 474.250   3
 -11   1  30-1207.46 634.959   2
  11  -1 -30-557.503 596.837   3
  11  -1 -27 1438.45 623.458   3
 -10  11 -27 1918.42 685.589   1
  -1 -10 -27 453.034 559.555   1
 -11   1  27 1966.34 649.977   2
  11  -1 -24-140.513 484.288   3
 -10  11 -24 523.601 406.681   1
  -1 -10 -24-177.640 593.378   1
  -1 -10 -21 1088.24 464.689   1
 -10  11 -21 953.680 495.923   1
  11  -1 -21 1903.11 701.989   3
  -1 -10 -18 20202.3 1872.62   1
 -10  11 -18 17699.5 1806.69   1
  11  -1 -18 19975.5 1931.11   3
  11  -1 -15 44953.5 2819.94   3
  -1 -10 -15 54855.7 2867.23   1
 -10  11 -15 48657.7 2970.60   1
 -10  11 -12 45921.4 2638.22   1
  -1 -10 -12 49099.4 2539.03   1
 -10  11 -12 43228.5 1876.38   2
  11  -1 -12 47087.4 2885.89   3
  11  -1  -9 48913.1 2900.41   3
  -1 -10  -9 46041.3 2330.73   1
 -10  11  -9 42444.6 1566.33   2
 -10  11  -9 42558.1 2354.30   1
  11  -1  -6 606.836 356.034   3
  -1 -10  -6 1062.12 357.156   1
  10 -11   6 812.780 241.129   3
 -10  11  -6 689.355 152.944   2
  10 -11   3 7537.94 686.406   3
  -1 -10  -3 8644.67 871.951   1
  11  -1  -3 7064.53 1099.24   3
 -11   1   3 6269.89 966.949   1
  11  -1   0 20209.4 1892.66   3
   1  10   0 19018.2 1343.60   3
 -11   1   0 20032.4 1780.59   1
  10 -11   0 19575.8 1127.16   3
   1  10   0 21387.3 1278.30   1
  -1 -10   0 19540.4 1171.65   1
   1  10  -3 35092.0 1651.15   3
 -11   1  -3 35148.0 2453.39   1
   1  10  -3 36668.7 1507.11   1
 -10  11   3 35629.5 1549.88   3
  11  -1   3 35796.8 2495.77   3
 -10  11   3 31174.8 897.854   2
  -1 -10   3 34857.4 1349.98   1
  10 -11  -3 34013.9 1583.35   3
   1  10  -6 1470.59 348.816   3
  10 -11  -6 978.196 299.174   3
   1  10  -6 1392.79 250.752   1
 -11   1  -6 1110.06 399.950   1
  -1 -10   6 1368.19 207.295   1
 -10  11   6 1313.17 251.235   2
   1  10  -9 39572.5 1716.86   3
  -1 -10   9 38219.8 1800.69   3
 -11   1  -9 41975.0 2843.28   1
 -10  11   9 39193.3 1612.79   2
  10 -11  -9 40398.1 2039.93   3
  10 -11 -12 57047.2 2630.25   3
   1  10 -12 50717.9 2035.78   3
 -10  11  12 48577.4 2031.95   2
 -11   1 -12 53335.4 3313.81   1
   1  10 -15 53392.1 2192.26   3
 -11   1 -15 56738.9 3480.78   1
 -10  11  15 46258.9 2148.52   2
  10 -11 -15 53492.3 2701.94   3
   1  10 -18 25187.5 1697.17   3
 -11   1 -18 27811.2 2569.76   1
   1  10 -21 1591.44 484.116   3
 -11   1 -21 1450.59 700.956   1
  -1 -10  24 3.92356 379.812   2
 -11   1 -24-1169.10 749.367   1
 -11   1 -27-155.560 530.548   1
  -1 -10  27 930.869 567.344   2
 -11   1 -30-173.786 487.793   1
  -1 -10  30 13.1130 400.169   2
 -11   1 -33 453.200 613.823   1
  -1 -10  33 257.941 374.981   2
  -1 -10  36-150.535 486.447   2
 -11   1 -36-172.005 583.583   1
   0 -11 -34 1771.84 931.329   1
 -11   0  34 1476.22 749.857   2
  11   0 -34 2154.29 906.649   3
   0 -11 -31 2568.47 929.972   1
  11   0 -31 2871.77 996.126   3
 -11   0  31 2763.64 918.280   2
   0 -11 -28 664.476 635.810   1
 -11   0  28 1176.80 656.284   2
  11   0 -28 1451.78 662.333   3
 -11  11 -28 1689.10 781.932   1
   0 -11 -25 395.142 558.877   1
 -11  11 -25 2712.08 848.319   1
  11   0 -25 2313.35 791.208   3
 -11  11 -22 155.584 373.391   1
   0 -11 -22-819.708 795.236   1
  11   0 -22-84.2168 336.333   3
 -11  11 -19 174.662 283.199   1
  11   0 -19 325.953 395.990   3
  11   0 -16 2918.15 782.310   3
 -11  11 -16 3051.71 872.334   1
   0 -11 -16 2739.12 674.832   1
   0 -11 -13 2615.09 601.577   1
 -11  11 -13 2741.20 748.665   1
  11   0 -13 4216.25 910.452   3
 -11  11 -10 24578.3 1909.51   1
  11   0 -10 25792.4 2175.53   3
   0 -11 -10 27289.5 1835.06   1
 -11  11 -10 20852.5 1254.33   2
  11 -11   7 52224.4 2072.04   3
 -11  11  -7 47342.5 1597.03   2
  11   0  -7 52467.3 3097.95   3
 -11  11  -7 43345.1 2333.19   1
 -11   0   7 47071.2 2504.57   1
   0 -11  -7 54856.5 2456.25   1
  11 -11   4 88772.5 2623.98   3
   0 -11  -4 85858.4 2836.56   1
  11   0  -4 90877.5 4068.13   3
 -11   0   4 84937.4 3548.20   1
  11   0  -1 86563.3 4010.41   3
   0 -11  -1 88659.0 2604.29   1
   0  11   1 83085.5 2720.11   3
  11 -11   1 83400.1 2567.27   3
 -11   0   1 88242.8 3770.13   1
  11 -11  -2 82785.7 2672.85   3
   0  11  -2 85620.4 2486.42   3
 -11   0  -2 82491.9 3858.12   1
 -11  11   2 90314.6 2649.40   3
   0 -11   2 88790.6 2303.47   1
   0  11  -2 87910.1 2422.18   1
  11   0   2 87576.1 4029.40   3
   0  11  -5 68832.6 2026.58   3
   0  11  -5 70701.8 1866.28   1
  11   0   5 63526.6 3468.91   3
  11 -11  -5 64610.5 2479.17   3
 -11  11   5 62541.1 1712.80   2
 -11   0  -5 68425.1 3554.58   1
 -11  11   8 13245.7 924.976   2
  11 -11  -8 12432.0 1134.82   3
   0  11  -8 13348.4 895.804   3
   0 -11  11 20016.0 1303.80   3
 -11   0 -11 23943.4 2227.61   1
  11 -11 -11 22545.4 1640.61   3
 -11  11  11 21147.7 1320.91   2
   0  11 -11 22400.8 1266.91   3
 -11   0 -14 8235.50 1228.35   1
 -11  11  14 6953.30 718.070   2
  11 -11 -14 8055.29 984.169   3
   0  11 -14 10509.4 958.648   3
  11 -11 -17 989.535 506.681   3
 -11  11  17 821.830 413.119   2
 -11   0 -17 133.737 501.368   1
   0  11 -17 511.188 319.978   3
 -11   0 -20 1759.51 608.639   1
  11 -11 -20 3178.65 793.541   3
 -11  11  20 2477.23 610.335   2
 -11   0 -23 2692.59 1017.57   1
   0 -11  23 780.524 396.671   2
 -11   0 -26-330.502 640.852   1
   0 -11  26 214.144 375.043   2
   0 -11  29 726.863 449.161   2
 -11   0 -29-155.741 673.262   1
 -11   0 -32 1696.27 1028.85   1
   0 -11  32 1303.29 670.506   2
 -11   0 -35 320.823 696.039   1
   0 -11  35 897.420 639.561   2
 -11  -1 -34 1629.94 1149.98   1
   1 -12  34 2859.75 973.933   2
 -11  -1 -31 1311.93 913.960   1
   1 -12  31 1607.12 758.011   2
 -11  -1 -28 1201.88 897.441   1
   1 -12  28 2561.42 783.138   2
 -11  -1 -25 14297.1 2082.54   1
 -12  11  25 10177.0 1375.21   2
   1 -12  25 13549.5 1569.03   2
 -12  11  22 35520.7 2381.19   2
  12 -11 -22 40505.1 2846.63   3
   1 -12  22 37206.1 2426.65   2
 -11  -1 -22 44819.0 3468.42   1
 -12  11  19 33334.8 2143.07   2
 -11  -1 -19 40995.8 3193.16   1
  12 -11 -19 38868.4 2636.13   3
  12 -11 -16 72489.8 3382.80   3
 -12  11  16 66648.5 2835.40   2
   1 -12  13 73643.6 2496.46   3
  12 -11 -13 84707.8 3471.50   3
 -11  -1 -13 82534.9 4250.51   1
 -12  11  13 74549.0 2763.28   2
  -1  12 -13 82422.7 2451.13   3
 -11  -1 -10 55527.1 3382.26   1
   1 -12  10 47988.3 1834.73   3
 -12  11  10 50330.0 2039.53   2
  -1  12 -10 51575.1 1707.31   3
  12 -11 -10 52628.5 2600.30   3
  12 -11  -7 111689. 3583.94   3
  -1  12  -7 114347. 2084.37   1
  -1  12  -7 111053. 2316.40   3
 -11  -1  -4 139037. 5162.06   1
  -1  12  -4 147164. 2686.90   3
  11   1   4 143207. 5304.23   3
  -1  12  -4 148432. 2908.65   1
  12 -11  -4 139193. 3845.02   3
  12 -11  -1 156393. 3906.48   3
  -1  12  -1 169991. 3296.15   3
  11   1   1 169066. 5801.78   3
  -1  12  -1 172386. 3577.76   1
   1 -12   1 173755. 3467.64   1
 -11  -1  -1 158295. 5419.77   1
  11   1  -2 218665. 6540.19   3
   1 -12  -2 215274. 4349.46   1
  12 -11   2 201437. 4402.06   3
 -11  -1   2 201798. 5782.60   1
  12 -11   5 171889. 4044.88   3
 -11  -1   5 171785. 5082.41   1
  11   1  -5 176149. 5830.55   3
   1 -12  -5 186038. 4389.57   1
  12 -11   8 170767. 4078.22   3
 -12  11  -8 160087. 4875.36   1
  11   1  -8 170546. 5730.83   3
   1 -12  -8 180398. 4611.76   1
 -11  -1   8 169736. 4924.27   1
  11   1 -11 142810. 5186.96   3
 -12  11 -11 135742. 4887.01   1
 -12  11 -11 115080. 3274.62   2
 -11  -1  11 123672. 4009.10   1
   1 -12 -11 138473. 4271.28   1
  11   1 -14 58647.1 3376.46   3
   1 -12 -14 59767.1 2983.60   1
 -12  11 -14 57465.4 3443.91   1
 -12  11 -17 8033.47 1410.20   1
   1 -12 -17 7784.84 1171.48   1
  11   1 -17 6066.28 1163.61   3
  11   1 -20 7575.88 1343.87   3
 -12  11 -20 6809.66 1337.90   1
   1 -12 -20 8370.51 1372.28   1
   1 -12 -23 8450.02 1400.72   1
 -12  11 -23 7609.58 1437.94   1
  11   1 -23 8090.28 1399.55   3
  11   1 -26 4351.75 1096.03   3
   1 -12 -26 4626.05 1206.99   1
 -12  11 -26 4649.54 1196.03   1
   1 -12 -29 12413.0 1908.58   1
 -11  -1  29 5144.13 1168.87   2
 -12  11 -29 6959.68 1520.92   1
  11   1 -29 10150.2 1663.57   3
  11   1 -32 5162.99 1308.83   3
   1 -12 -32 7617.41 1586.10   1
 -11  -1  32 5559.91 1301.31   2
  11   1 -35 4447.74 1307.51   3
   1 -12 -35 5297.60 1469.98   1
 -10  -2 -35 2539.58 1147.77   1
 -10  -2 -32 2285.77 1175.73   1
   2 -12  32 2372.04 867.086   2
 -10  -2 -29 3218.99 1172.46   1
   2 -12  29 4027.86 994.646   2
 -12  10  29 2931.27 854.882   2
 -10  -2 -26 5364.90 1378.42   1
 -12  10  26 5799.87 1080.89   2
   2 -12  26 5882.62 1067.57   2
 -10  -2 -23 22888.9 2463.81   1
  12 -10 -23 19047.1 2031.41   3
 -12  10  23 17078.4 1712.51   2
   2 -12  23 16939.0 1675.28   2
  12 -10 -20 45342.2 2930.70   3
 -12  10  20 42146.6 2569.30   2
   2 -12  20 48379.0 2551.56   2
  12 -10 -17 71954.0 3418.60   3
 -12  10  17 64524.7 2889.49   2
 -10  -2 -17 74290.4 4055.62   1
   2 -12  17 65348.2 2769.56   2
   2 -12  14 82234.6 2599.97   3
  12 -10 -14 102069. 3868.98   3
 -10  -2 -14 102201. 4572.98   1
 -12  10  14 85162.0 3097.54   2
  12 -10 -11 106028. 3797.02   3
   2 -12  11 94240.0 2450.48   3
 -10  -2 -11 110651. 4634.41   1
 -12  10  11 98934.4 3011.32   2
  -2  12 -11 106050. 2365.93   3
  -2  12  -8 84567.8 1791.62   3
 -10  -2  -8 87726.1 4003.46   1
  -2  12  -8 83149.6 1543.28   1
  12 -10  -8 83404.5 3220.35   3
  12 -10  -5 108179. 3540.11   3
 -10  -2  -5 114113. 4421.60   1
  -2  12  -5 109149. 1853.12   3
  -2  12  -5 117332. 2399.59   1
  -2  12  -2 176799. 3413.35   1
  12 -10  -2 161674. 4195.38   3
  -2  12  -2 177667. 2634.09   3
 -10  -2  -2 167967. 5280.11   1
  10   2   2 171556. 5758.63   3
 -10  -2   1 255475. 6448.64   1
  10   2  -1 254810. 6936.11   3
  12 -10   1 251531. 5156.78   3
   2 -12  -1 267644. 4595.51   1
 -10  -2   4 275373. 6386.32   1
  12 -10   4 273562. 5329.21   3
  10   2  -4 277564. 7119.65   3
   2 -12  -4 278233. 5119.74   1
  10   2  -7 262354. 6896.34   3
  12 -10   7 265031. 5323.26   3
   2 -12  -7 277397. 5582.94   1
 -12  10  -7 256953. 6102.90   1
 -10  -2   7 267709. 6006.58   1
  10   2 -10 207641. 6100.63   3
   2 -12 -10 224098. 5343.23   1
 -10  -2  10 215366. 5302.21   1
 -12  10 -10 210146. 5933.09   1
  10   2 -13 129577. 4822.10   3
   2 -12 -13 116255. 4117.36   1
 -12  10 -13 122483. 4899.00   1
 -12  10 -16 37837.7 2869.84   1
  10   2 -16 35647.1 2576.66   3
   2 -12 -16 35565.7 2401.91   1
 -12  10 -19 7936.79 1395.35   1
  10   2 -19 5565.07 1094.59   3
   2 -12 -19 6061.09 1115.92   1
  10   2 -22 7162.39 1333.60   3
   2 -12 -22 7499.75 1285.46   1
 -12  10 -22 6739.27 1357.87   1
  10   2 -25 3186.44 948.987   3
   2 -12 -25 2242.77 893.062   1
 -12  10 -25 4019.26 1124.54   1
  10   2 -28 3481.48 979.094   3
   2 -12 -28 4382.31 1207.52   1
 -12  10 -28 3339.51 1134.01   1
 -12  10 -31 10280.0 1941.07   1
  10   2 -31 8758.08 1536.69   3
   2 -12 -31 9685.39 1753.48   1
 -10  -2  31 6972.81 1389.69   2
  10   2 -34 4956.15 1258.76   3
   2 -12 -34 5535.79 1415.12   1
 -10  -2  34 4871.99 1272.34   2
  -9  -3 -36 514.729 720.560   1
  -9  -3 -33 552.397 701.419   1
  -9  -3 -30 114.150 593.213   1
   3 -12  30 1639.52 658.774   2
 -12   9  30 2035.56 732.429   2
  -9  -3 -27 1.70672 594.150   1
   3 -12  27 697.211 441.087   2
 -12   9  27 422.944 358.468   2
  -9  -3 -24-338.283 632.838   1
   3 -12  24-479.708 375.846   2
 -12   9  24-293.045 491.205   2
  12  -9 -24-73.7111 456.577   3
  -9  -3 -21 1232.55 790.739   1
   3 -12  21 361.841 296.203   2
 -12   9  21 394.758 332.973   2
  12  -9 -21 1179.23 538.392   3
  -9  -3 -18 787.443 700.924   1
  12  -9 -18 404.037 404.397   3
 -12   9  18 6.76605 280.897   2
   3 -12  18 361.703 279.872   2
  -9  -3 -15 1058.86 620.340   1
   3 -12  15 27.9766 219.039   3
 -12   9  15-279.417 365.741   2
   3 -12  15 1304.60 368.616   2
  12  -9 -15 931.242 510.962   3
   3 -12  12 2557.92 356.198   3
  -9  -3 -12 5187.89 1040.49   1
  12  -9 -12 4878.56 929.282   3
  12  -9  -9 2201.30 552.367   3
  -3  12  -9 2633.34 276.806   1
   3 -12   9 2766.47 339.160   3
  -9  -3  -9 2711.08 750.684   1
  -3  12  -9 2572.77 312.002   1
  -3  12  -6 21787.9 632.200   3
  -3  12  -6 24534.2 1042.05   1
  -9  -3  -6 22292.2 1910.17   1
  12  -9  -6 23803.2 1705.85   3
  -3  12  -3 113417. 2604.55   1
  -9  -3  -3 104787. 4010.10   1
  12  -9  -3 108685. 3609.77   3
   9   3   3 105394. 4395.09   3
  -3  12  -3 100686. 1239.80   3
  12  -9   0 89606.5 3196.24   3
   9   3   0 92752.5 4094.06   3
  -3  12   0 92644.8 1863.13   3
  -9  -3   0 88372.7 3634.29   1
   9   3  -3 59185.3 3209.34   3
  12  -9   3 58324.7 2579.51   3
  -9  -3   3 55315.5 2807.05   1
   3 -12  -3 57608.8 2233.69   1
   3 -12  -6 19165.7 1411.71   1
   9   3  -6 18775.1 1812.40   3
  12  -9   6 19716.6 1513.30   3
 -12   9  -6 17946.1 1660.14   1
   3 -12  -9 1111.98 498.206   1
   9   3  -9 1068.92 534.975   3
 -12   9  -9 348.022 367.863   1
  -9  -3   9 1197.71 455.770   1
   9   3 -12 4599.57 942.057   3
 -12   9 -12 2699.78 773.023   1
  -9  -3  12 3247.56 629.721   1
   3 -12 -12 2913.04 689.576   1
 -12   9 -15-817.068 678.476   1
   9   3 -15-162.560 420.753   3
   3 -12 -15-421.075 559.506   1
 -12   9 -18 2636.53 835.028   1
   3 -12 -18 1382.40 474.570   1
   9   3 -18 1991.43 655.278   3
   9   3 -21 2694.94 766.312   3
 -12   9 -21 1719.14 625.895   1
   3 -12 -21 2206.51 687.006   1
   9   3 -24 8863.92 1346.62   3
 -12   9 -24 9802.64 1634.43   1
   3 -12 -24 9860.26 1428.03   1
   3 -12 -27 1504.96 753.469   1
   9   3 -27 2594.88 829.703   3
 -12   9 -27 3790.33 1076.85   1
 -12   9 -30 1388.24 804.554   1
   3 -12 -30-127.436 544.999   1
   9   3 -30 1158.60 679.417   3
  -9  -3  30 435.423 424.296   2
 -12   9 -33 1184.31 823.730   1
   3 -12 -33 1166.65 762.233   1
  -9  -3  33 1695.96 810.943   2
   9   3 -33 2230.18 851.993   3
 -12   8  34 251.255 376.213   2
  -8  -4 -34 9.45626 585.719   1
  -8  -4 -31-12.2415 514.942   1
 -12   8  31-51.7237 422.678   2
  -8  -4 -28 24.8307 557.382   1
   4 -12  28 67.2937 297.637   2
  12  -8 -28 70.9921 385.591   3
  -8  -4 -25 1431.91 722.372   1
  12  -8 -25 867.004 504.397   3
   4 -12  25 1066.65 498.638   2
 -12   8  25 1228.74 571.225   2
  -8  -4 -22-579.905 650.458   1
   4 -12  22 88.1699 322.106   2
 -12   8  22-178.271 422.198   2
  12  -8 -22-18.5465 295.296   3
   4 -12  19 21830.6 1590.36   2
  12  -8 -19 23675.1 2034.22   3
 -12   8  19 21165.5 1767.91   2
  -8  -4 -19 26972.0 2399.98   1
   4 -12  16 39328.5 1847.57   3
  -8  -4 -16 44492.0 2920.03   1
  12  -8 -16 41157.7 2579.85   3
   4 -12  16 42771.2 2071.48   2
   4 -12  13 47641.8 1703.92   3
  12  -8 -13 49163.8 2749.81   3
  -4  12 -13 42633.5 968.559   1
  -4  12 -13 45432.4 1181.00   1
  -8  -4 -13 52561.4 3047.68   1
   4 -12  13 47269.1 1977.43   2
  -4  12 -10 35655.2 1071.64   1
   4 -12  10 34793.1 1123.78   3
  -4  12 -10 37718.0 1369.93   1
  12  -8 -10 38422.8 2319.67   3
  -8  -4 -10 40164.5 2521.41   1
  12  -8  -7 16783.6 1496.04   3
  -4  12  -7 17090.2 873.547   1
  -8  -4  -7 17945.7 1641.45   1
  12  -8  -4 4905.86 810.738   3
  -4  12  -4 5248.54 553.114   1
  -8  -4  -4 5617.34 904.139   1
   8   4   1 16072.0 1682.82   3
  -8  -4  -1 13275.6 1322.25   1
  -4  12  -1 14462.2 998.748   1
  12  -8  -1 15505.9 1380.97   3
  12  -8   2 1289.64 421.656   3
   8   4  -2 1229.31 475.636   3
  -4  12   2 1206.30 208.956   3
  -8  -4   2 958.586 378.718   1
  -8  -4   5 749.519 341.566   1
 -12   8  -5 207.488 263.292   1
  -4  12   5 147.133 108.817   3
  12  -8   5 490.793 283.907   3
   8   4  -5-318.795 553.802   3
   8   4  -8 47037.5 2754.35   3
  -8  -4   8 48509.2 2320.36   1
   4 -12  -8 45545.8 2301.06   1
  -4  12   8 44414.8 1826.41   3
 -12   8  -8 44664.2 2710.81   1
   8   4 -11 77661.5 3461.74   3
   4 -12 -11 76685.6 3147.82   1
 -12   8 -11 72112.2 3747.58   1
  -8  -4  11 76054.3 2841.67   1
   4 -12 -14 66445.5 3115.95   1
 -12   8 -14 71040.2 3844.90   1
  -8  -4  14 69043.4 2658.06   1
   8   4 -14 68283.5 3275.03   3
 -12   8 -17 59864.8 3697.24   1
   4 -12 -17 59499.0 3027.84   1
   8   4 -17 51462.0 2912.49   3
   4 -12 -20 13080.4 1583.30   1
 -12   8 -20 11371.6 1702.16   1
   8   4 -20 10444.8 1392.46   3
 -12   8 -23 410.138 585.702   1
   8   4 -23 413.129 414.595   3
   4 -12 -26 1411.95 779.324   1
 -12   8 -26 1236.32 744.675   1
   8   4 -26 579.579 523.129   3
 -12   8 -29-315.360 709.347   1
   4 -12 -29 639.736 579.796   1
  -8  -4  29 585.224 508.071   2
   8   4 -29-50.6463 344.436   3
 -12   8 -32 207.332 453.543   1
   8   4 -32 558.105 524.402   3
  -8  -4  32-63.8360 418.288   2
   4 -12 -32 492.821 565.150   1
   4 -12 -35 154.051 472.240   1
 -12   8 -35 198.293 563.353   1
  -8  -4  35 633.540 609.036   2
 -12   7  35 125.708 409.938   2
  -7  -5 -35-52.3591 533.018   1
 -12   7  32-477.292 540.199   2
  -7  -5 -32-618.586 649.544   1
  -7  -5 -29 55.6511 505.319   1
 -12   7  29-463.705 536.778   2
  12  -7 -29-1246.83 670.958   3
  12  -7 -26-591.338 594.426   3
  -7  -5 -26-206.898 562.282   1
 -12   7  26-217.437 498.854   2
  -7  -5 -23 71.4730 460.946   1
   5 -12  23 313.785 285.411   2
 -12   7  23 161.638 350.561   2
  12  -7 -23-44.9557 470.913   3
  12  -7 -20 3203.95 819.326   3
  -7  -5 -20 2938.87 810.404   1
   5 -12  20 3023.82 607.105   2
 -12   7  20 1468.98 470.240   2
   5 -12  17 13459.4 1151.76   2
  12  -7 -17 14354.4 1582.88   3
  -5  12 -17 14830.0 884.844   1
  -7  -5 -17 11707.8 1498.48   1
   5 -12  14 3073.29 454.030   3
  -5  12 -14 3664.24 457.012   1
   5 -12  14 3311.78 526.004   2
  12  -7 -14 4418.55 865.696   3
  -7  -5 -14 3422.78 769.490   1
  12  -7 -11 11872.1 1262.57   3
   5 -12  11 13309.5 729.468   3
  -5  12 -11 15235.4 1008.72   1
   5 -12  11 13380.4 938.252   2
  -7  -5 -11 13688.1 1432.33   1
  -5  12  -8 18858.2 955.071   1
  -7  -5  -8 21977.3 1768.46   1
   5 -12   8 17916.6 967.336   2
  12  -7  -8 21716.2 1765.24   3
  12  -7  -5 3265.64 700.723   3
  -5  12  -5 3515.38 452.946   1
  12  -7  -2 107.405 209.789   3
  -5  12  -2 69.4386 129.650   1
   7   5   2 53.9752 242.486   3
  -7  -5  -2 109.339 201.694   1
  -5  12   1 5432.16 312.746   3
  12  -7   1 6017.57 915.775   3
  -7  -5   1 5768.70 822.992   1
   7   5  -1 5229.34 934.957   3
   7   5  -4 6151.53 966.326   3
 -12   7  -4 5480.07 912.881   1
  -7  -5   4 6522.74 838.950   1
  12  -7   4 6400.18 930.038   3
  -5  12   4 6517.17 526.850   3
   7   5  -7 349.591 284.063   3
  -7  -5   7 386.075 178.411   1
  12  -7   7 469.916 306.494   3
  -5  12   7-143.563 317.995   3
 -12   7  -7 494.482 367.319   1
   5 -12 -10 11175.9 1134.59   1
   7   5 -10 13432.9 1407.38   3
 -12   7 -10 11890.3 1463.28   1
   5 -12 -10 10733.6 950.176   2
  -7  -5  10 12507.8 1099.06   1
 -12   7 -13 3210.17 761.084   1
   7   5 -13 2975.95 596.063   3
  -7  -5  13 3282.77 560.220   1
   5 -12 -13 1820.12 462.369   1
   5 -12 -16 5723.37 943.077   1
   7   5 -16 4965.18 890.165   3
 -12   7 -16 6013.32 1144.17   1
  -7  -5  16 6344.28 753.427   1
  -7  -5  16 4695.77 531.097   1
   5 -12 -19 17845.9 1755.45   1
 -12   7 -19 15062.0 1931.68   1
   7   5 -19 13386.5 1491.56   3
   5 -12 -22 9401.45 1432.00   1
   7   5 -22 5885.66 1101.48   3
 -12   7 -22 6658.37 1361.36   1
   5 -12 -25 7871.04 1334.19   1
 -12   7 -25 6420.32 1369.76   1
   7   5 -25 6215.63 1128.60   3
   5 -12 -28 1868.15 892.572   1
 -12   7 -28 95.6656 558.630   1
   7   5 -28 1035.81 578.117   3
  -7  -5  28 1506.47 706.759   2
 -12   7 -31-756.720 763.196   1
  -7  -5  31-115.079 396.219   2
   5 -12 -31 352.958 553.343   1
   7   5 -31 393.167 487.918   3
 -12   7 -34-1303.95 826.605   1
  -7  -5  34-70.6251 505.059   2
   5 -12 -34-224.964 566.460   1
 -12   7 -37-48.8545 468.419   1
 -12   6  36 534.995 604.175   2
  -6  -6 -36 2265.45 1034.47   1
  -6  -6 -33 2402.88 1137.26   1
 -12   6  33 817.145 559.278   2
  12  -6 -30 2318.27 899.763   3
 -12   6  30 1600.00 708.957   2
  -6  -6 -30 4047.30 1278.69   1
  -6  -6 -27 5803.10 1312.96   1
 -12   6  27 2798.53 873.952   2
  12  -6 -27 3530.35 1025.12   3
 -12   6  24 954.075 507.973   2
  12  -6 -24 1391.18 585.663   3
  -6  12 -21-259.454 284.399   1
  12  -6 -21-86.2271 373.475   3
  -6  12 -18 632.984 243.767   1
  12  -6 -18-19.5430 398.389   3
  12  -6 -15 419.912 321.010   3
   6 -12  15 274.589 153.576   3
   6 -12  15 476.684 212.251   2
  -6  12 -15 687.831 271.322   1
  -6  -6 -12 9605.88 1227.77   1
   6 -12  12 9922.96 812.218   2
  -6  12 -12 9149.58 896.950   1
  12  -6 -12 10949.2 1293.10   3
   6 -12  12 9265.26 678.561   3
  12  -6  -9 20683.7 1789.06   3
   6 -12   9 19622.6 983.849   2
  -6  12  -9 19021.0 1192.87   1
  12  -6  -6 47896.4 2633.05   3
  -6  -6  -6 51666.5 2493.37   1
  12  -6  -3 37487.8 2308.09   3
  -6  -6  -3 39164.5 2073.21   1
   6 -12   3 32000.8 755.778   2
  12  -6   0 13456.0 1365.92   3
   6   6   0 12545.1 1434.24   3
  -6  -6   0 15077.6 1263.67   1
  -6  12   3 32996.6 1039.51   3
 -12   6  -3 32189.2 2099.14   1
   6   6  -3 33587.4 2193.54   3
  -6  -6   3 31201.6 1645.37   1
   6 -12  -3 30654.7 925.522   2
   6   6  -3 36089.2 1843.22   1
  -6  -6   6 28923.6 1553.46   1
  12  -6   6 31225.2 2086.37   3
   6   6  -6 27760.1 1956.41   3
   6 -12  -6 26799.6 1090.18   2
 -12   6  -6 30929.2 2254.67   1
  -6  12   6 29768.1 1272.91   3
   6   6  -9 22707.1 1749.73   3
  -6  -6   9 20352.3 1255.35   1
   6 -12  -9 20312.6 1159.26   2
 -12   6  -9 21122.9 1962.02   1
  -6  -6  12 15490.8 1069.33   1
   6   6 -12 13719.7 1341.71   3
 -12   6 -12 17654.3 1917.20   1
  -6  -6  15 11196.6 885.009   1
 -12   6 -15 12830.6 1702.87   1
   6   6 -15 10252.8 1221.29   3
  -6  -6  15 8801.35 627.887   1
   6 -12 -15 12828.8 1366.05   1
 -12   6 -18 12215.2 1689.25   1
   6 -12 -18 13225.3 1499.27   1
  -6  -6  18 12837.9 950.230   1
   6   6 -18 12336.6 1361.70   3
 -12   6 -21 4843.57 1155.37   1
   6   6 -21 4197.86 844.309   3
   6   6 -24-582.590 584.956   3
 -12   6 -24-835.782 886.387   1
 -12   6 -27-1883.87 886.086   1
   6   6 -27-252.013 447.707   3
   6 -12 -27 376.031 517.808   1
  -6  -6  27-1282.70 643.517   2
   6   6 -30-154.009 371.744   3
  -6  -6  30-466.414 478.642   2
   6 -12 -30 810.457 651.796   1
 -12   6 -30-859.672 693.217   1
 -12   6 -33-943.491 768.690   1
   6 -12 -33 1261.34 786.910   1
  -6  -6  33-776.004 636.536   2
 -12   6 -36-276.725 647.467   1
  -6  -6  36 285.969 527.402   2
 -12   6 -39 718.148 857.652   1
  -5  -7 -34 4805.33 1344.64   1
 -12   5  34 1506.90 830.190   2
  -5  -7 -31 6871.40 1466.00   1
 -12   5  31 4556.79 1127.72   2
  12  -5 -31 4370.13 1263.81   3
  -5  -7 -28 11439.5 1808.96   1
 -12   5  28 8606.71 1410.83   2
  12  -5 -28 9364.20 1592.27   3
  -5  -7 -25 17890.3 2084.92   1
 -12   5  25 12076.4 1564.08   2
  12  -5 -25 14620.3 1837.42   3
  -5  -7 -22 30411.8 2530.26   1
  12  -5 -22 24605.3 2220.30   3
  -7  12 -22 28749.1 1819.65   1
  -5  -7 -19 23734.1 2140.82   1
  -7  12 -19 24266.9 1612.31   1
  12  -5 -19 23902.3 2147.95   3
  12  -5 -16 2750.25 734.761   3
  -5  -7 -16 1564.32 544.883   1
  -7  12 -16 3138.63 632.292   1
   7 -12  16 2905.55 510.698   3
  12  -5 -13 3548.35 788.599   3
  -7  12 -13 4048.76 674.251   1
  -5  -7 -13 2736.64 615.559   1
   7 -12  13 4410.87 525.618   3
   7 -12  10 49336.1 1322.68   3
  -7  12 -10 50184.3 2210.49   1
  12  -5  -7 75457.7 3406.09   3
  -5  -7  -7 80272.6 3090.25   1
  12  -5  -4 266338. 6333.01   3
  -5  -7  -4 265464. 5273.75   1
  12  -5  -1 914637. 11515.9   3
  -5  -7  -1 875123. 8897.23   1
 -12   5  -2 540667. 9002.32   1
  -7  12   2 568900. 4114.59   3
  12  -5   2 612977. 9627.36   3
   5   7  -2 544059. 8649.44   3
  -5  -7   2 567045. 6667.47   1
   5   7  -2 592456. 7369.85   1
  -7  12   5 111445. 2330.77   3
   5   7  -5 111777. 3727.81   3
 -12   5  -5 112981. 4281.73   1
  12  -5   5 119055. 4219.65   3
  -5  -7   5 113464. 2770.10   1
 -12   5  -8 67206.3 3532.67   1
   5   7  -8 68466.7 2904.92   3
  -5  -7   8 65482.0 1933.84   1
  -7  12   8 64171.5 2118.14   3
   5   7 -11 28725.3 1899.05   3
 -12   5 -11 30386.3 2522.72   1
   7 -12 -11 25122.9 1338.18   2
  -5  -7  11 25465.5 1096.93   1
   5   7 -14 905.631 386.123   3
  -5  -7  14 1069.95 222.288   1
  -5  -7  14 1057.56 189.942   1
 -12   5 -17 14274.2 1878.10   1
   5   7 -17 13641.9 1403.68   3
  -5  -7  17 12474.0 744.421   1
 -12   5 -20 27367.7 2645.57   1
   5   7 -20 26450.7 1976.96   3
 -12   5 -23 24902.4 2577.39   1
   5   7 -23 20388.8 1834.34   3
   5   7 -26 9632.27 1356.91   3
 -12   5 -26 10791.1 1827.83   1
  -5  -7  26 7200.65 1252.63   2
 -12   5 -29 5772.38 1436.42   1
   5   7 -29 6650.93 1222.20   3
  -5  -7  29 5433.87 1192.96   2
 -12   5 -32 868.658 868.943   1
  -5  -7  32 3061.39 967.897   2
 -12   5 -35 1015.58 1065.92   1
  -5  -7  35 2873.94 1028.91   2
 -12   5 -38 2025.86 1286.71   1
  -4  -8 -35 801.954 805.138   1
 -12   4  35 795.795 670.934   2
  -4  -8 -32 2069.38 894.848   1
 -12   4  32 937.758 624.793   2
  12  -4 -32 1047.55 728.949   3
  -4  -8 -29 3800.16 1105.39   1
 -12   4  29 2310.56 800.781   2
  12  -4 -29 1248.10 722.796   3
 -12   4  26 233.844 422.416   2
  -4  -8 -26 257.104 511.976   1
  12  -4 -23 4060.16 931.758   3
  -8  12 -23 4900.37 831.157   1
  -4  -8 -23 4336.91 1014.38   1
  -4  -8 -20 12309.5 1558.22   1
  -8  12 -20 10008.9 1159.48   1
  12  -4 -20 10731.9 1478.48   3
  -4  -8 -17 6577.15 1096.05   1
  -8  12 -17 5814.31 881.229   1
  12  -4 -17 5643.83 1055.78   3
  12  -4 -14 6980.65 1113.08   3
  -4  -8 -14 7045.35 1113.72   1
   8 -12  14 6252.53 658.007   3
  -8  12 -14 6669.77 946.535   1
   8 -12  11 20578.7 986.085   3
  -4  -8 -11 21945.5 1755.99   1
  -8  12 -11 22415.1 1595.25   1
   8 -12   8 23437.8 837.898   3
   8 -12   8 22806.5 787.578   3
  12  -4  -8 27514.5 2173.58   3
  -4  -8  -8 26890.9 1838.97   1
  12  -4  -5 53620.1 2936.36   3
  -4  -8  -5 53374.5 2373.50   1
  -4  -8  -2 95578.2 2933.31   1
  12  -4  -2 92667.7 3865.35   3
   4   8   2 80328.3 3332.95   3
 -12   4   2 81458.7 3252.16   1
  12  -4   1 100170. 4031.57   3
  -8  12   1 95458.5 1889.25   3
   4   8  -1 90432.3 3432.37   3
 -12   4  -1 90062.7 3722.36   1
  -4  -8   1 94254.6 2663.47   1
  -8  12   4 113296. 2283.11   3
  12  -4   4 115623. 4294.44   3
   4   8  -4 112173. 3603.80   3
  -4  -8   4 107613. 2597.03   1
   4   8  -4 112176. 2956.78   1
 -12   4  -4 114277. 4304.39   1
  -8  12   7 29931.4 1390.51   3
   4   8  -7 31657.0 1887.32   3
  -4  -8   7 29612.8 1156.83   1
 -12   4  -7 34526.5 2560.16   1
   4   8 -10 10915.9 1120.41   3
  -4  -8  10 8938.92 516.615   1
 -12   4 -10 11216.6 1556.57   1
 -12   4 -13 6768.96 1255.09   1
   4   8 -13 5451.80 786.139   3
   4   8 -16 1450.31 457.350   3
 -12   4 -16 1525.59 695.673   1
   4   8 -19 5814.30 908.541   3
 -12   4 -19 6750.18 1345.75   1
   4   8 -22 4976.24 902.836   3
 -12   4 -22 5337.34 1213.94   1
 -12   4 -25 3717.28 1151.21   1
   4   8 -25 2937.57 768.082   3
 -12   4 -28 3404.34 1193.19   1
  -4  -8  28 2737.87 858.119   2
 -12   4 -31 3726.95 1296.44   1
  -4  -8  31 3746.69 1062.68   2
 -12   4 -34 658.660 867.438   1
  -4  -8  34 2942.33 991.136   2
 -12   4 -37 1133.90 1051.91   1
  -3  -9 -33 546.754 602.341   1
 -12   3  33 302.129 361.868   2
  12  -3 -33 685.108 627.742   3
  -3  -9 -30-1222.89 877.311   1
 -12   3  30-673.549 503.385   2
  12  -3 -30-10.9636 417.666   3
  12  -3 -27-215.044 361.473   3
  -3  -9 -27-1824.41 802.110   1
 -12   3  27-1163.66 587.429   2
  -3  -9 -24 2653.12 891.647   1
  -9  12 -24 2780.56 716.607   1
  12  -3 -24 2440.51 799.667   3
  12  -3 -21 5041.90 1065.78   3
  -3  -9 -21 4255.06 990.019   1
  -9  12 -21 4153.39 857.433   1
  -3  -9 -18 7810.77 1262.42   1
  -9  12 -18 8580.80 1171.25   1
  12  -3 -18 6864.84 1168.29   3
  12  -3 -15 3516.92 838.193   3
  -9  12 -15 3972.33 776.145   1
  -3  -9 -15 3617.54 785.104   1
  -9  12 -12 800.128 291.701   1
  12  -3 -12 78.3324 493.411   3
  -3  -9 -12 127.578 297.670   1
  -3  -9  -9 4539.36 739.753   1
   9 -12   9 3740.09 432.254   3
  -9  12  -9 3464.21 639.074   1
  12  -3  -9 4630.74 908.539   3
  -3  -9  -6 8282.58 954.407   1
  12  -3  -6 8345.02 1208.47   3
   9 -12   6 8239.11 548.864   3
  -3  -9  -3 5052.13 686.602   1
  12  -3  -3 4697.18 883.126   3
 -12   3   3 5386.49 867.625   1
   9 -12   3 5755.55 445.997   3
   3   9   0 16663.5 1251.36   1
  -3  -9   0 15186.9 1097.04   1
  12  -3   0 17514.5 1748.83   3
   3   9   0 14390.2 1350.48   3
 -12   3   0 15479.9 1541.19   1
   9 -12   0 16151.1 837.490   3
   3   9  -3 8787.74 844.751   1
   9 -12  -3 8065.11 701.340   3
  -3  -9   3 7556.62 690.120   1
   3   9  -3 8594.16 978.984   3
 -12   3  -3 8010.37 1161.37   1
  -9  12   3 8550.68 663.917   3
  12  -3   3 8607.80 1221.30   3
   3   9  -6 31017.0 1758.65   3
  -3  -9   6 28875.6 1109.77   1
  12  -3   6 29496.7 2252.00   3
  -9  12   6 28221.1 1329.79   3
   3   9  -6 30421.5 1315.09   1
   9 -12  -6 29624.9 1534.04   3
 -12   3  -6 28919.3 2375.25   1
 -12   3  -9 25214.6 2279.65   1
   9 -12  -9 26586.3 1617.86   3
  -3  -9   9 22576.5 667.000   1
   3   9  -9 24581.7 1564.76   3
   3   9 -12 1901.78 445.873   3
 -12   3 -12 1844.99 611.956   1
 -12   3 -15 1998.27 705.363   1
   3   9 -15 2190.11 524.961   3
 -12   3 -18 4764.71 1073.36   1
   3   9 -18 5218.78 849.430   3
 -12   3 -21-175.308 687.612   1
   3   9 -21 722.741 359.490   3
   3   9 -24 3558.90 802.201   3
 -12   3 -24 4429.43 1229.83   1
  -3  -9  27 4069.10 982.956   2
 -12   3 -27 4247.46 1292.87   1
 -12   3 -30 1175.11 929.590   1
  -3  -9  30 2168.94 842.279   2
 -12   3 -33 746.337 798.679   1
  -3  -9  33 1644.93 782.881   2
 -12   3 -36 723.921 847.621   1
  -3  -9  36 864.743 680.179   2
  12  -2 -34 181.455 504.608   3
 -12   2  34-604.337 528.704   2
  -2 -10 -34-624.144 687.078   1
  12  -2 -31-176.526 446.047   3
  -2 -10 -31-1533.00 952.559   1
 -12   2  31-754.203 542.325   2
 -12   2  28 426.457 478.532   2
  12  -2 -28 610.516 555.768   3
  -2 -10 -25 690.988 451.941   1
  12  -2 -25 143.618 401.786   3
 -10  12 -25 755.485 490.673   1
 -10  12 -22 10332.4 1433.59   1
  -2 -10 -22 12153.9 1614.89   1
  12  -2 -22 10672.9 1554.89   3
 -10  12 -19 15573.9 1708.32   1
  -2 -10 -19 19632.3 1921.49   1
  12  -2 -19 14948.2 1769.59   3
 -10  12 -16 27602.6 2216.33   1
  -2 -10 -16 26823.4 2137.78   1
  12  -2 -16 23653.4 2192.93   3
  12  -2 -13 36086.1 2637.10   3
  -2 -10 -13 37985.1 2357.19   1
 -10  12 -13 34586.5 2330.90   1
 -10  12 -10 8769.38 1080.91   1
  -2 -10 -10 9289.18 1100.85   1
  12  -2 -10 9703.12 1358.44   3
  12  -2  -7 14665.3 1636.59   3
  -2 -10  -7 13287.7 1255.83   1
  10 -12   7 13858.1 896.646   3
  12  -2  -4 20248.3 1929.30   3
  -2 -10  -4 18153.4 1335.22   1
  10 -12   4 18509.4 979.562   3
 -12   2   4 17389.3 1603.25   1
  10 -12   1 16406.2 938.664   3
  12  -2  -1 16882.9 1768.49   3
 -12   2   1 14542.3 1537.91   1
  -2 -10  -1 15529.1 1127.57   1
   2  10   1 14640.6 1310.00   3
 -12   2  -2 37832.5 2568.24   1
   2  10  -2 41753.0 1840.38   1
   2  10  -2 37576.1 1976.86   3
  12  -2   2 41602.6 2757.91   3
 -10  12   2 39827.1 1569.84   3
  10 -12  -2 37318.9 1560.31   3
  -2 -10   2 37860.8 1559.94   1
 -12   2  -5 92877.3 4272.79   1
   2  10  -5 96395.0 2941.33   3
  12  -2   5 93360.3 4098.83   3
  10 -12  -5 90017.3 2704.88   3
  -2 -10   5 93722.1 2058.61   1
 -10  12   5 92519.9 2469.31   3
   2  10  -5 97486.6 2460.68   1
   2  10  -8 78921.0 2628.81   3
 -12   2  -8 82708.3 4118.02   1
  10 -12  -8 80449.8 2805.30   3
 -12   2 -11 48037.6 3210.75   1
  10 -12 -11 45141.6 2317.79   3
   2  10 -11 41330.4 1933.73   3
 -12   2 -14 33952.4 2824.36   1
  10 -12 -14 37147.5 2257.27   3
   2  10 -14 33250.8 1829.27   3
 -12   2 -17 29597.4 2705.55   1
   2  10 -17 25578.7 1684.26   3
   2  10 -20 13444.1 1336.75   3
 -12   2 -20 16060.2 2080.74   1
 -12   2 -23 10381.2 1820.15   1
   2  10 -23 7718.94 1170.08   3
  -2 -10  26 9786.76 1443.04   2
 -12   2 -26 9615.68 1857.73   1
 -12   2 -29 6573.02 1615.85   1
  -2 -10  29 5877.85 1205.48   2
 -12   2 -32 2058.07 1127.21   1
  -2 -10  32 2655.31 922.471   2
 -12   2 -35 452.453 817.839   1
  -2 -10  35 964.501 685.999   2
  -1 -11 -35-502.969 654.029   1
  12  -1 -35 512.708 585.609   3
 -12   1  32 171.629 394.191   2
  12  -1 -32-183.658 442.104   3
  12  -1 -29-184.915 485.197   3
  -1 -11 -29-1142.75 735.781   1
 -12   1  29 435.857 430.952   2
  -1 -11 -26 79.5731 624.136   1
 -11  12 -26 746.088 478.545   1
  12  -1 -26 628.254 442.088   3
  -1 -11 -23-302.951 668.673   1
 -11  12 -23 596.467 431.057   1
  12  -1 -23-3.53360 410.417   3
  -1 -11 -20 3257.70 788.998   1
  12  -1 -20 3439.98 906.701   3
 -11  12 -20 3009.53 844.054   1
 -11  12 -17 420.146 348.373   1
  12  -1 -17 621.529 452.999   3
 -11  12 -14 1240.54 545.067   1
  -1 -11 -14 479.042 304.034   1
  12  -1 -11 18869.0 1924.11   3
 -11  12 -11 14708.1 1027.00   2
  -1 -11 -11 17341.7 1541.35   1
 -11  12 -11 15900.0 1566.40   1
  11 -12   8 4380.74 575.169   3
  12  -1  -8 3661.72 876.419   3
 -11  12  -8 2564.42 473.539   1
 -11  12  -8 3303.25 398.797   2
  -1 -11  -8 4514.02 781.633   1
  11 -12   5 10484.4 857.631   3
  12  -1  -5 11261.5 1487.22   3
 -11  12  -5 8985.20 461.389   2
  -1 -11  -5 11761.4 1108.04   1
 -12   1   5 11158.0 1317.78   1
  11 -12   2 9090.47 796.759   3
  12  -1  -2 10132.8 1424.29   3
 -12   1   2 8500.86 1189.00   1
  -1 -11  -2 9152.20 878.635   1
  11 -12  -1 24.5872 187.814   3
   1  11  -1 202.014 185.724   3
  -1 -11   1 584.621 199.602   1
   1  11  -1 31.2430 149.088   1
  12  -1   1-30.8821 299.159   3
 -12   1  -1-393.322 643.704   1
 -12   1  -4 384.340 405.877   1
   1  11  -4-32.8492 176.636   3
  -1 -11   4 140.463 127.879   1
   1  11  -4-25.6842 159.129   1
 -11  12   4 511.107 197.431   3
  12  -1   4 148.622 307.182   3
 -11  12   4 14.5727 66.1871   2
  11 -12  -4-102.722 192.061   3
   1  11  -7 1314.20 360.417   3
   1  11  -7 834.148 187.224   1
  11 -12  -7 744.086 195.206   3
 -11  12   7 759.119 187.770   2
  11 -12 -10-78.3755 289.303   3
 -12   1 -10-114.675 420.700   1
   1  11 -10 17.9480 176.943   3
   1  11 -13 3026.10 526.394   3
 -12   1 -13 356.205 838.794   1
 -11  12  13 610.515 413.327   2
  11 -12 -13 2430.72 577.887   3
  11 -12 -16 15900.9 1570.61   3
 -12   1 -16 15965.1 1935.84   1
   1  11 -16 14970.2 1227.76   3
 -12   1 -19 24762.1 2514.72   1
   1  11 -19 25166.5 1735.72   3
 -12   1 -22 17166.8 2227.71   1
  -1 -11  25 10686.9 1454.45   2
 -12   1 -25 13478.5 2164.22   1
 -12   1 -28 240.444 610.167   1
  -1 -11  28 150.769 454.641   2
  -1 -11  31 643.886 547.964   2
 -12   1 -31 26.4263 602.741   1
 -12   1 -34 60.6421 574.675   1
  -1 -11  34-139.849 445.219   2
  -1 -11  37-18.2179 382.735   2
  12   0 -33 606.633 606.341   3
   0 -12 -33 780.326 716.892   1
 -12   0  33 373.402 525.688   2
   0 -12 -30-204.588 438.506   1
  12   0 -30-67.0403 438.135   3
 -12   0  30-148.883 384.150   2
   0 -12 -27-133.705 481.403   1
  12   0 -27-496.789 532.901   3
 -12  12 -27-1062.96 716.225   1
  12   0 -24 132.393 383.792   3
 -12  12 -24-538.280 612.457   1
   0 -12 -24-317.563 564.012   1
  12   0 -21 3429.34 906.919   3
 -12  12 -21 3153.93 881.739   1
   0 -12 -21 2563.16 679.956   1
  12   0 -18 870.828 496.191   3
 -12  12 -18 1852.18 680.382   1
   0 -12 -18 1153.91 528.724   1
  12   0 -15 3323.55 841.251   3
 -12  12 -15 4287.18 951.639   1
   0 -12 -15 3575.71 760.846   1
 -12  12 -12 2502.93 576.708   1
  12   0 -12 3040.29 886.169   3
   0 -12 -12 1547.73 469.555   1
 -12  12  -9 1209.19 519.340   1
 -12   0   9 1353.11 499.909   1
  12   0  -9 1331.40 594.399   3
   0 -12  -9 1642.85 495.401   1
 -12  12  -9 1116.12 283.088   2
  12 -12   9 1615.68 427.189   3
  12   0  -6 430.599 373.385   3
 -12   0   6 540.146 319.177   1
  12 -12   6 707.334 240.635   3
 -12  12  -6 713.978 188.816   2
  12 -12   3 1282.33 354.103   3
  12   0  -3 762.459 416.736   3
 -12   0   3 1107.09 496.023   1
   0 -12  -3 856.699 273.946   1
 -12   0   0 3426.24 679.389   1
   0  12   0 4833.22 675.924   3
   0 -12   0 4643.62 630.967   1
  12   0   0 4222.07 956.719   3
  12 -12   0 4212.98 612.932   3
   0  12  -3 39889.3 1702.81   3
   0 -12   3 41132.5 1544.69   1
  12   0   3 40940.4 2938.77   3
   0  12  -3 41880.2 1708.23   1
 -12   0  -3 37433.3 2767.28   1
 -12  12   3 36135.8 1148.14   2
  12 -12  -3 39248.2 1971.95   3
 -12   0  -6 56073.1 3389.79   1
   0  12  -6 49562.8 1799.69   3
   0  12  -6 53670.1 1692.48   1
  12   0   6 54661.5 3365.50   3
 -12  12   6 47979.4 1604.34   2
  12 -12  -6 48453.9 2264.88   3
 -12   0  -9 74307.0 3992.19   1
   0  12  -9 67237.8 2112.59   3
 -12  12   9 66426.3 2211.03   2
  12 -12  -9 68962.6 2920.21   3
 -12   0 -12 22640.2 2240.53   1
  12 -12 -12 24608.6 1844.17   3
 -12  12  12 21502.2 1401.20   2
   0  12 -12 23858.2 1348.01   3
  12 -12 -15-233.565 442.042   3
   0  12 -15 925.033 353.925   3
 -12  12  15 432.418 243.618   2
 -12   0 -15-559.688 709.242   1
   0  12 -18 223.908 229.536   3
 -12  12  18 18.6570 242.688   2
  12 -12 -18-315.852 433.974   3
 -12   0 -21 5193.25 1230.47   1
 -12   0 -24-1771.33 1098.00   1
   0 -12  24 803.166 466.996   2
 -12   0 -27-1089.50 936.155   1
   0 -12  27-58.8782 340.189   2
 -12   0 -30 612.773 637.576   1
   0 -12  30 1211.54 646.707   2
 -12   0 -33-193.424 732.463   1
   0 -12  33 1582.36 691.758   2
   0 -12  36 455.016 570.860   2
   1 -13  35 842.665 698.359   2
 -12  -1 -32-139.747 552.409   1
   1 -13  32 597.274 513.104   2
 -12  -1 -29-436.715 730.922   1
   1 -13  29 1155.49 559.193   2
 -12  -1 -26 3224.85 1127.20   1
   1 -13  26 2710.36 766.437   2
 -12  -1 -23 3081.84 1070.39   1
  13 -12 -23 3246.83 922.293   3
 -13  12  23 2564.74 694.872   2
   1 -13  23 2878.98 733.020   2
 -12  -1 -20 1751.23 802.213   1
 -13  12  20 598.376 366.688   2
   1 -13  20 904.759 426.441   2
  13 -12 -20 892.513 536.216   3
  13 -12 -17 561.931 385.765   3
 -13  12  17 668.769 326.224   2
 -12  -1 -17 899.677 629.629   1
  -1  13 -14 354.366 260.582   3
  13 -12 -14 466.434 376.944   3
 -12  -1 -14-294.657 597.524   1
 -13  12  14 353.132 309.220   2
  -1  13 -11 456.480 221.605   3
 -12  -1 -11 544.452 558.056   1
 -13  12  11 752.675 293.655   2
  13 -12 -11 332.634 371.945   3
  -1  13  -8 1312.61 224.500   1
  13 -12  -8 1253.32 440.481   3
  -1  13  -8 2077.58 334.797   3
 -13  12   8 1283.13 333.265   2
  -1  13  -5 36467.6 1386.60   3
  13 -12  -5 36440.3 2077.26   3
 -12  -1  -5 39058.6 2905.59   1
  12   1   5 39071.7 2923.40   3
  -1  13  -5 37980.7 1523.52   1
  13 -12  -2 75347.1 2895.16   3
 -12  -1  -2 81205.7 4058.92   1
  -1  13  -2 82038.8 2267.54   3
  12   1   2 80666.6 4203.99   3
  -1  13  -2 80411.0 2495.73   1
   1 -13   2 76770.7 2304.65   1
  13 -12   1 68858.2 2689.92   3
 -12  -1   1 74107.0 3768.58   1
   1 -13  -1 74844.5 2566.07   1
  -1  13   1 71376.2 2483.78   3
  12   1  -1 74076.2 4020.24   3
  12   1  -4 28230.5 2471.55   3
  13 -12   4 30384.4 1766.95   3
   1 -13  -4 31751.8 1841.63   1
 -12  -1   4 32603.2 2390.00   1
   1 -13  -7 588.753 366.264   1
  12   1  -7-60.1532 391.374   3
 -13  12  -7-687.837 736.914   1
  13 -12   7 137.064 218.476   3
 -12  -1   7 109.334 276.423   1
   1 -13 -10 8581.33 1113.41   1
 -13  12 -10 7889.92 1205.88   1
 -12  -1  10 8108.00 1147.87   1
  13 -12  10 8795.88 979.788   3
 -13  12 -10 7097.60 775.445   2
  12   1 -10 8748.70 1435.75   3
 -13  12 -13 1751.92 556.118   1
  12   1 -13 3206.21 860.263   3
   1 -13 -13 3675.36 796.891   1
  12   1 -16-228.365 716.578   3
   1 -13 -16 1633.35 583.801   1
 -13  12 -16-95.1694 545.089   1
  12   1 -19-402.343 596.635   3
   1 -13 -19-168.374 428.113   1
  12   1 -22 4007.59 1016.02   3
 -13  12 -22 3918.75 1047.94   1
   1 -13 -22 3305.88 901.729   1
   1 -13 -25 7335.12 1369.30   1
 -13  12 -25 5584.57 1217.38   1
  12   1 -25 6333.87 1304.93   3
   1 -13 -28 1622.72 824.470   1
 -13  12 -28 457.298 534.903   1
  12   1 -28 1714.83 783.603   3
  12   1 -31 1100.37 720.663   3
   1 -13 -31 1557.27 829.080   1
 -12  -1  31 379.344 527.833   2
  12   1 -34 588.635 729.093   3
 -11  -2 -33 1822.86 1081.51   1
   2 -13  33 1920.26 795.657   2
 -11  -2 -30 1423.44 870.724   1
   2 -13  30 2057.58 769.721   2
 -11  -2 -27 6340.68 1522.93   1
   2 -13  27 6247.78 1114.07   2
 -13  11  27 4393.00 977.650   2
  13 -11 -24 11184.2 1631.81   3
 -13  11  24 10192.8 1379.17   2
   2 -13  24 12742.5 1468.92   2
 -13  11  21 11453.3 1363.04   2
   2 -13  21 13964.5 1459.84   2
  13 -11 -21 14543.9 1748.93   3
 -13  11  18 10086.4 1204.51   2
   2 -13  18 11111.2 1231.84   2
  13 -11 -18 10163.5 1414.57   3
 -11  -2 -15 8819.26 1497.95   1
 -13  11  15 7921.69 996.508   2
  13 -11 -15 9786.72 1336.70   3
   2 -13  12 13746.5 998.947   3
 -11  -2 -12 18207.5 2062.37   1
  13 -11 -12 17580.7 1666.29   3
 -13  11  12 14623.5 1239.34   2
  -2  13  -9 32647.9 1194.66   3
  13 -11  -9 30516.3 2052.94   3
 -11  -2  -6 55217.0 3286.23   1
  -2  13  -6 54536.2 1658.70   1
  -2  13  -6 52537.4 1349.46   3
  13 -11  -6 51623.8 2555.98   3
  -2  13  -3 114194. 2089.69   3
 -11  -2  -3 107909. 4519.44   1
  11   2   3 110805. 4807.96   3
  -2  13  -3 113199. 2780.97   1
  13 -11  -3 110538. 3650.56   3
 -11  -2   0 154500. 5326.06   1
  13 -11   0 149702. 4165.66   3
  11   2   0 156364. 5793.81   3
   2 -13   0 162393. 3561.79   1
  -2  13   0 160564. 3087.49   3
  13 -11   3 113017. 3544.96   3
 -11  -2   3 117818. 4495.36   1
  11   2  -3 113122. 4853.24   3
   2 -13  -3 118631. 3383.76   1
  13 -11   6 50536.9 2379.51   3
  11   2  -6 43162.3 2937.81   3
   2 -13  -6 51981.9 2452.09   1
 -13  11  -6 45230.4 2576.80   1
 -11  -2   6 49138.1 2786.24   1
 -11  -2   9 36413.2 2345.76   1
  11   2  -9 37426.8 2787.62   3
  13 -11   9 36893.8 2065.42   3
 -13  11  -9 34679.7 2433.27   1
   2 -13  -9 37483.9 2234.99   1
  11   2 -12 18456.4 1960.52   3
   2 -13 -12 17992.7 1690.14   1
 -11  -2  12 16330.6 1576.62   1
 -13  11 -12 17540.7 1890.23   1
  11   2 -15 2566.57 680.188   3
 -13  11 -15 3462.90 905.496   1
   2 -13 -15 3658.90 832.067   1
  11   2 -18 2956.15 852.409   3
   2 -13 -18 3211.12 828.916   1
 -13  11 -18 3374.54 911.626   1
  11   2 -21 5667.13 1225.32   3
   2 -13 -21 3244.62 861.968   1
 -13  11 -21 3837.65 1071.51   1
   2 -13 -24 3211.60 957.134   1
 -13  11 -24 2815.42 921.320   1
  11   2 -24 4067.61 1041.61   3
  11   2 -27 4067.85 1084.44   3
   2 -13 -27 5233.86 1276.35   1
 -13  11 -27 3371.87 1159.08   1
 -13  11 -30 3907.63 1284.31   1
 -11  -2  30 1242.01 714.615   2
   2 -13 -30 2854.63 1064.15   1
  11   2 -30 4665.45 1196.81   3
  11   2 -33 3567.40 1123.40   3
   2 -13 -33 5340.39 1347.85   1
 -11  -2  33 2379.58 945.949   2
 -10  -3 -34 2464.34 1243.87   1
   3 -13  31 2559.03 800.712   2
 -10  -3 -31 2521.23 1094.32   1
 -13  10  31 2418.16 812.772   2
 -10  -3 -28 1090.57 631.664   1
 -13  10  28 816.985 449.715   2
   3 -13  28 1767.56 649.642   2
 -10  -3 -25-356.686 716.909   1
 -13  10  25-441.412 549.631   2
   3 -13  25 124.801 297.936   2
  13 -10 -25-380.812 587.892   3
  13 -10 -22 788.217 449.777   3
 -13  10  22 628.947 379.218   2
   3 -13  22 921.450 420.180   2
  13 -10 -19 483.235 486.106   3
 -13  10  19 3.04971 309.001   2
   3 -13  19 717.155 387.906   2
 -10  -3 -19 1069.93 765.328   1
  13 -10 -16 2974.08 777.610   3
 -13  10  16 1872.03 527.094   2
   3 -13  16 1820.29 473.674   2
 -10  -3 -16 2520.92 852.806   1
   3 -13  13 10682.4 837.138   3
 -10  -3 -13 13192.8 1712.43   1
  13 -10 -13 14154.4 1527.77   3
  -3  13 -10 53174.4 1202.10   1
  -3  13 -10 54550.5 1064.12   1
  13 -10 -10 54507.1 2822.68   3
  13 -10  -7 74687.5 3202.43   3
 -10  -3  -7 83399.7 3940.00   1
  -3  13  -7 82211.8 1937.84   1
  -3  13  -4 59440.9 1894.55   1
  13 -10  -4 57579.3 2716.88   3
 -10  -3  -4 55527.1 3094.90   1
  -3  13  -4 49840.8 909.046   3
  10   3   4 54347.3 3323.85   3
  13 -10  -1 31456.8 1962.35   3
 -10  -3  -1 28792.3 2222.21   1
  -3  13  -1 30819.0 976.587   3
  10   3   1 31696.8 2538.72   3
 -10  -3   2 25359.3 2035.37   1
  10   3  -2 27201.2 2331.50   3
  13 -10   2 23662.6 1698.15   3
 -10  -3   5 22127.9 1835.85   1
  10   3  -5 19103.7 1892.61   3
   3 -13  -5 23867.1 1588.87   1
  13 -10   5 23911.5 1713.97   3
 -13  10  -5 21341.9 1791.87   1
   3 -13  -8 2954.72 642.381   1
  13 -10   8 2920.03 648.742   3
 -13  10  -8 2638.66 734.385   1
 -10  -3   8 3797.12 796.007   1
  10   3  -8 2522.31 767.020   3
 -13  10 -11 1297.40 599.482   1
   3 -13 -11 799.991 407.980   1
  10   3 -11 1979.30 737.188   3
 -10  -3  11 1006.84 456.068   1
  10   3 -14 8198.51 1254.46   3
   3 -13 -14 7489.60 1077.21   1
 -13  10 -14 7432.98 1352.86   1
 -10  -3  14 9224.42 1128.91   1
  10   3 -17 3514.67 841.095   3
 -13  10 -17 6213.75 1246.71   1
   3 -13 -17 4308.13 863.978   1
 -13  10 -20 484.068 558.474   1
   3 -13 -20-21.8832 422.577   1
  10   3 -20 416.965 436.985   3
   3 -13 -23-11.0587 550.477   1
  10   3 -23 126.349 325.215   3
 -13  10 -23 554.327 580.566   1
  10   3 -26 1008.63 585.131   3
 -13  10 -26 1213.17 717.756   1
   3 -13 -26 738.032 569.818   1
   3 -13 -29-61.0479 446.324   1
 -13  10 -29 662.164 638.640   1
  10   3 -29 263.706 412.824   3
 -13  10 -32 1325.88 858.706   1
  10   3 -32 1039.48 667.788   3
   3 -13 -32 546.715 600.987   1
 -10  -3  32 598.632 602.523   2
  10   3 -35 1975.49 886.583   3
  -9  -4 -35 169.888 485.851   1
  -9  -4 -32 506.518 732.607   1
 -13   9  32 864.252 536.919   2
  -9  -4 -29-823.817 705.550   1
   4 -13  29-250.864 353.076   2
 -13   9  29-263.804 411.106   2
  -9  -4 -26 551.783 615.822   1
   4 -13  26 746.231 482.030   2
 -13   9  26 363.925 435.863   2
  13  -9 -26 878.921 575.593   3
  -9  -4 -23-304.284 585.382   1
   4 -13  23 18.1252 310.487   2
 -13   9  23 165.533 304.979   2
  13  -9 -23 259.885 444.184   3
   4 -13  20 9848.81 1134.66   2
 -13   9  20 7561.89 1083.91   2
  -9  -4 -20 10189.8 1568.11   1
  13  -9 -20 9383.58 1402.66   3
   4 -13  17 20624.8 1514.60   2
 -13   9  17 16712.9 1525.90   2
  -9  -4 -17 22106.7 2222.08   1
  13  -9 -17 18698.8 1842.52   3
   4 -13  14 2852.23 433.712   3
  13  -9 -14 2891.94 721.527   3
   4 -13  14 3138.25 538.283   2
  -9  -4 -14 2969.07 784.715   1
  -4  13 -11 955.594 210.694   1
  13  -9 -11 1006.27 468.302   3
   4 -13  11 844.982 192.594   3
  -9  -4 -11 1414.40 596.053   1
  -4  13 -11 648.112 133.355   1
  -9  -4  -8-170.808 465.302   1
  -4  13  -8 77.1700 91.4334   1
  -4  13  -5 409.804 136.081   1
  13  -9  -5 539.503 318.093   3
  -9  -4  -2-154.593 378.887   1
   9   4   2 42.3605 306.140   3
  -4  13  -2 49.2255 138.274   1
   9   4  -1 12448.4 1564.97   3
  13  -9   1 13474.2 1325.02   3
  -4  13   1 13521.2 618.483   3
  -9  -4   1 13197.8 1392.32   1
  -9  -4   4 21801.0 1755.37   1
   9   4  -4 23521.3 2090.89   3
  13  -9   4 26603.9 1873.11   3
 -13   9  -4 22213.7 1792.18   1
  -4  13   4 23847.7 1096.81   3
  -9  -4   7 7763.10 1024.49   1
  -4  13   7 7183.47 719.446   3
 -13   9  -7 6792.54 1068.30   1
   9   4  -7 7344.83 1172.50   3
  13  -9   7 7451.83 1006.04   3
   4 -13  -7 7370.18 927.889   1
   4 -13 -10 34187.9 2125.10   1
  -9  -4  10 34098.8 2075.78   1
   9   4 -10 35603.2 2516.58   3
 -13   9 -10 33416.8 2514.76   1
   4 -13 -13 19149.4 1701.74   1
   9   4 -13 25316.3 2143.79   3
 -13   9 -13 23948.9 2296.09   1
  -9  -4  13 20615.9 1590.85   1
  -9  -4  16 2181.89 544.172   1
 -13   9 -16 3300.06 982.420   1
   4 -13 -16 1342.39 378.860   1
   9   4 -16 124.527 639.877   3
 -13   9 -19 9938.38 1643.80   1
   4 -13 -19 8015.29 1220.33   1
   9   4 -19 6286.74 1161.04   3
   9   4 -22 4153.13 980.103   3
   4 -13 -22 4123.85 941.939   1
 -13   9 -22 4214.30 1142.23   1
   4 -13 -25 825.802 796.988   1
 -13   9 -25 1203.94 747.149   1
   9   4 -25 2990.68 911.540   3
   9   4 -28 1662.63 746.606   3
   4 -13 -28 1195.07 687.663   1
 -13   9 -28 717.142 718.390   1
 -13   9 -31 1827.24 1014.12   1
  -9  -4  31 1739.82 800.863   2
   4 -13 -31 1799.11 838.753   1
   9   4 -31 1856.20 802.939   3
   9   4 -34 1646.05 797.246   3
   4 -13 -34 793.876 689.856   1
 -13   9 -34 278.298 509.793   1
  -9  -4  34 1185.86 733.911   2
 -13   8  36-69.1943 336.990   2
 -13   8  33 155.464 361.846   2
  -8  -5 -33-92.2828 560.141   1
  -8  -5 -30 807.744 689.664   1
 -13   8  30-330.487 437.312   2
  13  -8 -30 1164.56 744.575   3
  -8  -5 -27 1668.44 891.701   1
  13  -8 -27 2961.48 976.255   3
 -13   8  27 1657.94 677.131   2
  -8  -5 -24 4545.18 1172.34   1
   5 -13  24 3099.42 706.486   2
 -13   8  24 3340.30 876.128   2
  13  -8 -24 3518.08 982.665   3
  -8  -5 -21 623.653 481.675   1
   5 -13  21 805.906 361.896   2
 -13   8  21 255.526 314.895   2
  13  -8 -21 818.316 475.210   3
  -8  -5 -18 3596.76 913.419   1
   5 -13  18 3609.28 644.527   2
  13  -8 -18 3480.09 860.457   3
   5 -13  15 8114.88 762.287   3
  -5  13 -15 8132.77 597.916   1
   5 -13  15 9064.29 919.191   2
  -8  -5 -15 8380.83 1331.94   1
  13  -8 -15 9345.12 1296.87   3
   5 -13  12 7170.65 736.808   2
  -8  -5 -12 7400.95 1141.39   1
  -5  13 -12 5786.76 483.491   1
  13  -8 -12 5960.70 961.663   3
   5 -13  12 6321.41 521.808   3
  -5  13 -12 7324.18 692.880   1
  13  -8  -9 58055.0 2982.64   3
  -5  13  -9 53890.9 1594.92   1
   5 -13   9 53110.5 1772.81   2
  -5  13  -6 98080.1 2393.23   1
  13  -8  -6 106020. 3928.40   3
  -8  -5  -6 105804. 3966.63   1
  13  -8  -3 97699.7 3761.91   3
  -8  -5  -3 96114.0 3700.41   1
   8   5   3 96208.9 4258.85   3
  -5  13  -3 92149.1 2579.75   1
  -8  -5   0 40537.6 2331.08   1
   8   5   0 41816.0 2809.14   3
  13  -8   0 46095.5 2519.54   3
  -8  -5   3 39262.6 2211.46   1
   8   5  -3 39531.5 2649.54   3
  -5  13   3 41153.6 1206.56   3
 -13   8  -3 35227.7 2270.45   1
  13  -8   3 43141.9 2449.15   3
  -8  -5   6 36144.8 2087.66   1
   8   5  -6 35395.2 2474.90   3
  -5  13   6 36157.0 1468.44   3
  13  -8   6 38099.4 2323.45   3
 -13   8  -6 33717.1 2373.54   1
  -8  -5   9 8307.30 1005.14   1
   8   5  -9 8406.70 1204.51   3
   5 -13  -9 8099.07 980.631   1
 -13   8  -9 8513.21 1263.00   1
 -13   8 -12 39092.9 2925.62   1
   8   5 -12 37948.1 2530.45   3
   5 -13 -12 37926.8 2299.86   1
  -8  -5  12 38355.3 2025.19   1
  -8  -5  15 61510.0 2529.89   1
   8   5 -15 61852.1 3226.26   3
   5 -13 -15 62456.5 3144.34   1
   5 -13 -18 44220.3 2804.33   1
  -8  -5  18 40331.7 2017.84   1
   8   5 -18 44046.9 2778.46   3
   5 -13 -21 51670.5 3104.57   1
 -13   8 -21 49188.3 3684.20   1
   8   5 -21 44479.0 2868.90   3
   5 -13 -24 20933.9 2103.91   1
 -13   8 -24 18769.8 2434.80   1
   8   5 -24 19328.5 1971.92   3
   5 -13 -27 6861.26 1505.20   1
 -13   8 -27 5194.21 1420.61   1
   8   5 -27 7678.11 1351.99   3
   5 -13 -30 1174.62 755.984   1
 -13   8 -30 1194.83 851.592   1
  -8  -5  30 1645.03 786.383   2
   8   5 -30 1391.20 685.640   3
   5 -13 -33 960.091 711.460   1
 -13   8 -33 356.556 677.926   1
  -8  -5  33 1159.63 703.406   2
   8   5 -33 699.330 570.901   3
 -13   8 -36 478.769 709.959   1
 -13   7  34-65.1187 412.772   2
  -7  -6 -34 102.523 514.924   1
 -13   7  31-428.983 417.731   2
  -7  -6 -31 284.936 614.237   1
  13  -7 -31 461.349 561.079   3
  -7  -6 -28 2755.94 1100.91   1
 -13   7  28 2638.20 797.546   2
  13  -7 -28 2277.45 858.596   3
  -7  -6 -25 857.856 715.595   1
 -13   7  25 1756.36 675.806   2
  13  -7 -25 1866.77 727.897   3
  -7  -6 -22-80.0742 591.878   1
  13  -7 -22-1166.47 732.520   3
 -13   7  22 112.393 391.167   2
  -7  -6 -19-145.990 636.207   1
  13  -7 -19 271.164 430.429   3
   6 -13  19 1704.77 433.515   2
   6 -13  16 517.998 200.881   3
  -7  -6 -16-6.64596 599.344   1
  -6  13 -16 944.676 268.363   1
   6 -13  16 680.618 265.548   2
  13  -7 -16 321.232 246.479   3
   6 -13  13 4801.94 500.892   3
   6 -13  13 4705.36 595.433   2
  -7  -6 -13 4459.59 914.988   1
  -6  13 -13 5114.59 669.892   1
  13  -7 -13 4467.48 917.668   3
   6 -13  10 21035.5 1089.83   2
  13  -7 -10 22503.7 1924.28   3
  -7  -6 -10 24816.3 1947.48   1
  -6  13 -10 23348.9 1383.10   1
  13  -7  -7 50086.6 2787.23   3
  -6  13  -7 42432.0 1635.88   1
   6 -13   7 44649.7 1336.77   2
  -7  -6  -7 47726.7 2601.78   1
  13  -7  -4 54423.7 2877.55   3
  -7  -6  -4 52727.7 2607.35   1
  13  -7  -1 72815.4 3260.05   3
   7   6   1 67176.6 3458.80   3
  -7  -6  -1 66979.2 2813.96   1
  -6  13   2 17720.3 645.389   3
  13  -7   2 19913.7 1717.56   3
   7   6  -2 17268.6 1731.88   3
  -7  -6   2 18462.0 1416.46   1
 -13   7  -2 15892.8 1501.05   1
  -6  13   5 991.923 219.928   3
 -13   7  -5 591.631 300.598   1
   7   6  -5 744.677 295.234   3
  -7  -6   5 1035.78 350.697   1
   6 -13  -5 1040.60 195.018   2
 -13   7  -8 942.271 625.164   1
   7   6  -8 1448.52 512.201   3
  -7  -6   8 1889.55 435.825   1
  13  -7   8 1499.88 488.204   3
   6 -13  -8 1411.90 301.294   2
  -6  13   8 1447.29 322.754   3
   7   6 -11 309.040 337.330   3
 -13   7 -11 107.594 334.686   1
  -7  -6  11 259.035 176.720   1
 -13   7 -14 8987.47 1409.54   1
  -7  -6  14 9016.00 888.349   1
   7   6 -14 8237.39 1130.57   3
   6 -13 -17 13397.7 1484.73   1
 -13   7 -17 16009.3 2044.88   1
  -7  -6  17 14026.4 1095.74   1
   7   6 -17 12395.9 1435.85   3
 -13   7 -20 27384.0 2740.81   1
   6 -13 -20 24673.7 2162.68   1
   7   6 -20 21376.9 1938.50   3
 -13   7 -23 20330.9 2424.64   1
   7   6 -23 18380.7 1845.61   3
   6 -13 -26 3011.48 988.224   1
 -13   7 -26 1495.77 885.084   1
   7   6 -26 1856.01 707.883   3
  -7  -6  29-118.800 439.816   2
   6 -13 -29 1105.46 740.990   1
   7   6 -29 266.360 400.388   3
 -13   7 -29 31.3162 571.516   1
 -13   7 -32-848.160 923.536   1
  -7  -6  32-1315.09 666.428   2
   6 -13 -32 245.570 508.903   1
   7   6 -32-121.826 372.690   3
 -13   7 -35-1445.01 928.440   1
  -7  -6  35-75.4737 475.751   2
 -13   7 -38-1182.92 879.470   1
  -6  -7 -35 1517.41 890.161   1
 -13   6  35-167.707 473.409   2
  13  -6 -32 667.306 584.093   3
 -13   6  32-493.933 487.991   2
  -6  -7 -32 330.127 557.892   1
  13  -6 -29 507.001 578.687   3
 -13   6  29 246.340 359.456   2
  -6  -7 -29 661.337 738.275   1
  13  -6 -26-132.886 490.536   3
  -6  -7 -26-898.981 701.934   1
 -13   6  26-397.459 416.515   2
  -6  -7 -23 2666.32 850.089   1
 -13   6  23 2367.19 664.622   2
  13  -6 -23 2355.93 744.795   3
  -6  -7 -20-105.977 537.553   1
  13  -6 -20 811.032 530.399   3
  -6  -7 -17 7056.05 1215.91   1
  -7  13 -17 6561.19 813.398   1
  13  -6 -17 5690.99 1048.03   3
  -7  13 -14 8761.02 969.309   1
  13  -6 -14 8641.44 1259.47   3
   7 -13  14 8657.76 733.427   3
  -6  -7 -14 9070.08 1269.97   1
  13  -6 -11 9426.75 1283.08   3
   7 -13  11 8576.87 532.422   3
  -6  -7 -11 11015.3 1292.12   1
  -7  13 -11 9505.95 966.066   1
  -6  -7  -8 1606.38 534.763   1
  13  -6  -8 1506.81 572.265   3
  13  -6  -5 6175.40 1007.60   3
  -6  -7  -5 5605.23 834.630   1
  13  -6  -2 39506.5 2526.71   3
   6   7   2 37364.7 2526.41   3
  -6  -7  -2 38513.9 2048.58   1
  13  -6   1 81489.0 3560.59   3
   6   7  -1 73582.4 3444.84   3
  -6  -7   1 76929.6 2738.86   1
 -13   6  -1 72170.7 3257.53   1
  -7  13   4 39290.9 1252.72   3
   6   7  -4 36925.4 2342.55   3
  13  -6   4 40150.3 2512.47   3
  -6  -7   4 39011.6 1830.16   1
   7 -13  -4 34212.8 949.642   2
   6   7  -4 41265.5 1980.52   1
 -13   6  -4 38431.6 2531.61   1
   6   7  -7 3438.14 741.875   3
  -6  -7   7 3298.91 511.133   1
  13  -6   7 3212.82 747.218   3
 -13   6  -7 1984.56 677.640   1
   7 -13  -7 2747.25 366.507   2
  -7  13   7 3324.32 468.851   3
   6   7 -10 163.581 244.808   3
 -13   6 -10-295.393 517.031   1
  -6  -7  10 268.051 164.975   1
   7 -13 -10 175.304 153.403   2
 -13   6 -13 7621.75 1359.65   1
  -6  -7  13 7808.74 685.666   1
   6   7 -13 7925.63 1060.50   3
 -13   6 -16 13208.9 1792.23   1
  -6  -7  16 12182.3 859.673   1
   6   7 -16 11833.8 1341.93   3
 -13   6 -19-260.581 560.018   1
   6   7 -19 222.798 287.712   3
 -13   6 -22 60.8603 639.672   1
   6   7 -22 600.748 392.061   3
   6   7 -25 394.146 408.543   3
 -13   6 -25-509.913 740.222   1
 -13   6 -28 2351.86 917.198   1
  -6  -7  28 1609.85 648.908   2
   6   7 -28 3172.49 860.982   3
  -6  -7  31-160.127 477.188   2
 -13   6 -31-365.854 750.288   1
 -13   6 -34-2900.75 1189.77   1
  -6  -7  34-1226.93 683.624   2
 -13   6 -37-772.572 808.910   1
  -5  -8 -33 1140.25 783.222   1
 -13   5  33-385.517 554.217   2
  13  -5 -33-39.7620 422.870   3
 -13   5  30-86.0816 517.424   2
  13  -5 -30 868.556 621.721   3
 -13   5  27 1161.90 570.456   2
  -5  -8 -27 2006.29 876.885   1
  13  -5 -27 1490.45 645.519   3
  13  -5 -24 495.453 418.923   3
  -5  -8 -24 370.367 429.408   1
  13  -5 -21 3240.80 837.350   3
  -5  -8 -21 4035.41 951.371   1
  -8  13 -21 3878.55 705.214   1
  13  -5 -18-365.551 520.335   3
  -5  -8 -18-183.434 424.930   1
  -5  -8 -15 22725.6 2008.20   1
  -8  13 -15 19669.2 1603.82   1
   8 -13  15 19540.1 1181.12   3
  13  -5 -15 19694.4 1963.86   3
  13  -5 -12 19487.6 1879.22   3
  -5  -8 -12 18647.2 1743.89   1
  -8  13 -12 18270.7 1475.88   1
   8 -13  12 18193.2 932.824   3
  13  -5  -9 2922.31 785.082   3
  -5  -8  -9 2849.40 647.988   1
  -8  13  -9 2192.85 463.518   1
  13  -5  -6 3214.89 816.507   3
  -5  -8  -6 3040.52 674.067   1
  13  -5  -3 90434.3 3919.35   3
  -5  -8  -3 90192.0 3112.13   1
  13  -5   0 164479. 5264.91   3
   5   8   0 144857. 4713.27   3
  -5  -8   0 157245. 3826.73   1
 -13   5   0 149550. 4730.49   1
  -8  13   3 34593.3 1164.61   3
   5   8  -3 33244.6 2166.77   3
  -5  -8   3 33096.7 1620.00   1
  13  -5   3 38330.8 2531.26   3
   5   8  -3 34428.1 1819.60   1
 -13   5  -3 34741.6 2383.72   1
  -8  13   6 6176.21 593.403   3
  13  -5   6 6781.39 1084.10   3
  -5  -8   6 6455.17 639.919   1
   5   8  -6 4191.82 709.137   3
 -13   5  -6 6397.82 1087.35   1
   5   8  -9 8185.84 1043.20   3
 -13   5  -9 6276.21 1204.56   1
  -5  -8   9 5680.70 546.297   1
 -13   5 -12 31757.9 2722.51   1
   5   8 -12 32450.6 2047.41   3
  -5  -8  12 27322.9 983.678   1
  -5  -8  15 14189.8 555.430   1
   5   8 -15 17016.1 1501.21   3
 -13   5 -18 5140.22 1157.27   1
   5   8 -18 4929.44 876.453   3
   5   8 -21 3710.22 786.873   3
 -13   5 -21 3534.06 1006.28   1
   5   8 -24 4386.21 907.138   3
 -13   5 -24 3547.66 1093.56   1
 -13   5 -27 2191.16 963.505   1
   5   8 -27 2359.44 747.772   3
  -5  -8  27 247.174 419.499   2
 -13   5 -30 2220.57 969.427   1
  -5  -8  30 2096.35 777.059   2
 -13   5 -33-2422.52 1098.84   1
  -5  -8  33 55.7923 408.837   2
 -13   5 -36-1094.76 876.743   1
  -4  -9 -34-1119.03 767.184   1
 -13   4  34-1765.60 792.921   2
  13  -4 -34 106.492 434.071   3
  -4  -9 -31-994.030 710.041   1
  13  -4 -31-109.608 422.433   3
 -13   4  31-47.0424 450.239   2
  -4  -9 -28-167.889 549.536   1
 -13   4  28-529.642 502.247   2
  13  -4 -28-7.41108 393.816   3
  -4  -9 -25-637.134 636.945   1
  13  -4 -25-91.8263 470.264   3
  -9  13 -22 3038.13 712.765   1
  -4  -9 -22 1679.83 664.900   1
  13  -4 -22 3028.50 933.050   3
  -9  13 -19 2652.33 635.402   1
  -4  -9 -19 1882.69 705.972   1
  13  -4 -19 1693.18 649.482   3
  -9  13 -16 9842.02 1244.90   1
  -4  -9 -16 9058.42 1258.76   1
  13  -4 -16 8925.88 1373.81   3
   9 -13  13 7156.28 653.853   3
  -4  -9 -13 7450.64 1087.89   1
  13  -4 -13 8925.45 1310.07   3
  -9  13 -13 7814.81 1067.72   1
  13  -4 -10 1739.28 602.443   3
   9 -13  10 1887.51 286.487   3
   9 -13  10 1817.92 271.418   3
  -4  -9 -10 1668.32 517.966   1
  -9  13 -10 2005.85 498.763   1
   9 -13   7 696.754 136.539   3
  13  -4  -7 1236.32 522.548   3
  -4  -9  -7 929.586 378.284   1
  13  -4  -4 2336.80 666.072   3
  -4  -9  -4 2855.02 569.838   1
 -13   4   1-195.075 421.359   1
  -4  -9  -1 301.389 227.603   1
  13  -4  -1 303.409 299.757   3
   9 -13   1 447.150 123.733   3
   4   9  -2 183.161 180.405   1
  -4  -9   2-20.7444 205.276   1
   4   9  -2 416.201 296.920   3
  13  -4   2 265.569 298.977   3
  -9  13   2 143.946 100.500   3
 -13   4  -2 17.3250 486.025   1
   4   9  -5 7061.58 928.849   3
  -9  13   5 7524.74 646.734   3
   4   9  -5 7332.41 753.677   1
  13  -4   5 8251.28 1225.86   3
 -13   4  -5 7893.91 1180.74   1
  -4  -9   5 6811.30 636.378   1
 -13   4  -8 28066.2 2473.76   1
   4   9  -8 27942.9 1809.47   3
  -4  -9   8 25547.5 1032.69   1
   4   9 -11 20024.2 1543.70   3
 -13   4 -11 20354.4 2145.13   1
 -13   4 -14 6644.66 1258.28   1
   4   9 -14 5617.89 831.386   3
 -13   4 -17 3637.84 953.154   1
   4   9 -17 5124.17 834.604   3
   4   9 -20 8317.54 1122.75   3
 -13   4 -20 8056.49 1540.79   1
 -13   4 -23 1476.40 717.105   1
   4   9 -23 1900.17 607.879   3
  -4  -9  26 1749.43 718.177   2
 -13   4 -26 1530.65 866.422   1
   4   9 -26 1618.18 615.822   3
  -4  -9  29 228.079 452.669   2
 -13   4 -29 451.588 738.399   1
 -13   4 -32-350.787 618.943   1
  -4  -9  32 716.794 581.704   2
 -13   4 -35 187.575 576.534   1
  -4  -9  35 202.310 453.588   2
  -3 -10 -32-845.901 682.357   1
 -13   3  32 371.990 403.134   2
  13  -3 -32 542.228 547.475   3
 -13   3  29-355.112 530.835   2
  13  -3 -29-255.909 493.078   3
  -3 -10 -26 785.478 620.998   1
  13  -3 -26 1884.96 815.326   3
 -10  13 -23 8984.96 1334.79   1
  -3 -10 -23 7890.06 1377.93   1
  13  -3 -23 8576.02 1477.19   3
 -10  13 -20 25847.3 2243.85   1
  -3 -10 -20 22816.6 2177.74   1
  13  -3 -20 24732.6 2362.02   3
 -10  13 -17 20793.8 1959.74   1
  -3 -10 -17 20358.9 1962.47   1
  13  -3 -17 20411.6 2103.42   3
  13  -3 -14 20725.0 2090.16   3
 -10  13 -14 21437.9 1912.03   1
  -3 -10 -14 20969.1 1851.57   1
  13  -3 -11 7452.80 1236.62   3
  -3 -10 -11 5870.45 921.411   1
 -10  13 -11 5870.67 918.116   1
  13  -3  -8 3.95607 329.509   3
  10 -13   8 378.215 145.586   3
  -3 -10  -8 350.213 204.427   1
  10 -13   5 1979.16 285.995   3
  13  -3  -5 2351.74 711.902   3
  -3 -10  -5 2216.39 534.393   1
 -13   3   5 2002.86 551.921   1
  13  -3  -2 29173.1 2350.51   3
  -3 -10  -2 29191.6 1671.32   1
   3  10   2 28123.6 1984.25   3
 -13   3   2 29470.2 2183.84   1
  10 -13   2 27895.9 1089.59   3
  -3 -10   1 82769.3 2564.21   1
  13  -3   1 88040.0 4125.97   3
   3  10  -1 81115.1 3260.23   3
 -13   3  -1 82743.5 3774.49   1
  10 -13  -1 81937.8 2102.72   3
  10 -13  -4 108216. 2840.43   3
   3  10  -4 119999. 3104.02   1
 -13   3  -4 112904. 4637.07   1
  -3 -10   4 109549. 2591.89   1
 -10  13   4 111207. 2590.70   3
  13  -3   4 123606. 4828.81   3
   3  10  -4 110175. 3533.57   3
 -13   3  -7 108886. 4896.04   1
   3  10  -7 106652. 3373.27   3
  13  -3   7 111696. 4575.33   3
  -3 -10   7 101021. 1994.97   1
  10 -13  -7 104588. 3094.54   3
   3  10 -10 38677.6 2017.41   3
 -13   3 -10 40142.7 3083.27   1
 -13   3 -13 11965.7 1729.79   1
   3  10 -13 10311.2 1075.09   3
 -13   3 -16 5151.01 1200.21   1
   3  10 -16 5654.80 861.568   3
 -13   3 -19 2748.07 957.777   1
   3  10 -19 3465.73 728.382   3
   3  10 -22 7650.05 1116.35   3
 -13   3 -22 7381.71 1559.13   1
 -13   3 -25 11183.6 2030.32   1
  -3 -10  25 10843.5 1511.73   2
   3  10 -25 9601.60 1317.24   3
  -3 -10  28 6322.06 1262.27   2
 -13   3 -28 8621.83 1795.60   1
 -13   3 -31 3034.41 1302.57   1
  -3 -10  31 2501.93 914.810   2
 -13   3 -34 1786.60 1114.66   1
  -3 -10  34 871.239 654.863   2
 -13   2  33-708.080 538.148   2
  -2 -11 -33-1486.71 798.288   1
  13  -2 -33-338.285 473.662   3
  -2 -11 -30-840.736 695.979   1
 -13   2  30 551.794 526.514   2
  13  -2 -30 853.243 635.338   3
  -2 -11 -27-2054.63 854.277   1
  13  -2 -27-246.757 440.194   3
 -11  13 -24 7498.79 1315.61   1
  -2 -11 -24 7684.54 1409.83   1
  13  -2 -24 6378.95 1349.41   3
 -11  13 -21 18318.3 2011.20   1
  -2 -11 -21 19604.4 2074.86   1
  13  -2 -21 17715.1 2043.44   3
 -11  13 -18 15010.5 1753.56   1
  -2 -11 -18 12778.2 1553.39   1
  13  -2 -18 13611.5 1756.38   3
  13  -2 -15 13735.8 1701.20   3
 -11  13 -15 16122.4 1781.73   1
  -2 -11 -15 17255.8 1693.40   1
  -2 -11 -12 26207.9 1966.56   1
  13  -2 -12 28515.3 2467.20   3
 -11  13 -12 26204.3 2056.66   1
  11 -13   9 13465.2 958.080   3
  -2 -11  -9 13239.2 1330.74   1
 -11  13  -9 12147.2 1291.09   1
  13  -2  -9 13765.9 1711.68   3
  13  -2  -6 13748.1 1677.59   3
  11 -13   6 11974.8 852.194   3
  -2 -11  -6 13489.4 1252.54   1
 -13   2   6 11655.0 1340.24   1
  11 -13   3 37427.0 1489.86   3
  13  -2  -3 39352.6 2823.47   3
  -2 -11  -3 37197.6 1950.88   1
 -13   2   3 37661.9 2520.75   1
  13  -2   0 29595.3 2443.48   3
  11 -13   0 28146.5 1340.28   3
   2  11   0 26871.3 1813.71   3
  -2 -11   0 29176.4 1560.64   1
 -13   2   0 28790.4 2288.08   1
   2  11  -3 35759.7 1927.19   3
 -11  13   3 35657.7 1593.82   3
  13  -2   3 38916.4 2784.65   3
  -2 -11   3 34007.1 1508.75   1
   2  11  -3 41055.0 1838.80   1
  11 -13  -3 34585.9 1657.00   3
 -13   2  -3 35161.0 2668.49   1
  11 -13  -6 47192.5 2097.79   3
 -13   2  -6 48000.0 3284.93   1
  -2 -11   6 46628.9 1401.88   1
   2  11  -6 49074.8 2172.42   3
   2  11  -6 43876.0 1632.79   1
  13  -2   6 52501.7 3217.21   3
 -13   2  -9 28338.9 2559.62   1
   2  11  -9 25101.0 1549.99   3
  11 -13  -9 27160.6 1759.57   3
 -13   2 -12 29268.6 2665.00   1
   2  11 -12 25345.2 1576.91   3
  11 -13 -12 25864.8 1874.05   3
 -13   2 -15 26582.2 2614.29   1
   2  11 -15 23961.4 1616.10   3
 -13   2 -18 20886.9 2389.14   1
   2  11 -18 18903.9 1525.88   3
 -13   2 -21 19339.4 2429.84   1
   2  11 -21 15581.9 1497.40   3
   2  11 -24 7326.37 1116.31   3
 -13   2 -24 9665.12 1885.38   1
  -2 -11  24 8988.59 1376.25   2
  -2 -11  27 3636.01 1007.96   2
 -13   2 -27 4913.66 1449.91   1
 -13   2 -30 834.140 797.820   1
  -2 -11  30 1031.85 608.114   2
 -13   2 -33 258.541 648.188   1
  -2 -11  33-64.9834 383.673   2
  -2 -11  36-500.432 507.992   2
 -13   1  31 869.239 600.349   2
  13  -1 -31 472.886 499.818   3
  -1 -12 -31 259.605 583.368   1
  13  -1 -28 1904.50 834.291   3
  -1 -12 -28 2346.91 896.873   1
  -1 -12 -25 1826.23 815.335   1
 -12  13 -25 1481.14 626.433   1
  13  -1 -25 1652.20 734.010   3
  -1 -12 -22 7486.01 1353.04   1
  13  -1 -22 5923.75 1254.58   3
 -12  13 -22 6193.11 1331.82   1
 -12  13 -19 4219.59 1007.42   1
  -1 -12 -19 4366.28 970.507   1
  13  -1 -19 2910.42 863.953   3
  13  -1 -16-184.846 613.331   3
 -12  13 -16 816.955 501.095   1
  -1 -12 -16 796.392 383.897   1
  13  -1 -13 6167.16 1214.69   3
  -1 -12 -13 6837.78 1038.30   1
 -12  13 -13 6818.22 1133.47   1
  13  -1 -10 13042.9 1716.73   3
  12 -13  10 11812.6 1006.80   3
  -1 -12 -10 12092.0 1316.11   1
 -12  13 -10 11602.5 1365.98   1
  13  -1  -7 17242.9 1943.56   3
  12 -13   7 17151.1 1171.86   3
  -1 -12  -7 17991.4 1487.99   1
 -13   1   7 18014.9 1700.62   1
  12 -13   4 31694.3 1547.92   3
  13  -1  -4 33978.6 2736.60   3
  -1 -12  -4 31438.1 1828.87   1
 -13   1   4 29669.9 2304.80   1
 -13   1   1 32632.8 2481.44   1
  12 -13   1 33298.8 1633.55   3
  13  -1  -1 34664.4 2779.44   3
   1  12   1 30773.5 1895.63   3
  -1 -12  -1 32241.6 1719.86   1
  12 -13  -2 6600.34 773.550   3
  -1 -12   2 6748.74 700.507   1
 -13   1  -2 6092.02 1083.76   1
   1  12  -2 7324.62 846.398   3
  13  -1   2 6710.09 1219.05   3
   1  12  -2 7276.73 789.465   1
 -12  13   2 6997.03 756.824   3
   1  12  -5 789.281 271.045   3
 -13   1  -5 917.992 442.580   1
   1  12  -5 933.737 258.762   1
  -1 -12   5 671.317 184.169   1
  13  -1   5 982.794 525.020   3
  12 -13  -5 700.461 284.233   3
   1  12  -8 607.746 209.934   3
  12 -13  -8 454.255 249.242   3
 -13   1  -8 90.3255 542.799   1
   1  12 -11 1552.29 378.880   3
 -13   1 -11 1793.79 590.118   1
  12 -13 -11 1544.77 485.374   3
   1  12 -14 9396.67 950.708   3
 -13   1 -14 9338.76 1534.38   1
  12 -13 -14 9817.27 1242.62   3
 -13   1 -17 22592.1 2515.99   1
  12 -13 -17 22902.6 1998.14   3
   1  12 -17 22298.5 1557.89   3
 -13   1 -20 28749.6 2856.10   1
   1  12 -20 25118.3 1789.42   3
 -13   1 -23 15396.1 2217.94   1
  -1 -12  23 14680.2 1641.12   2
  -1 -12  26 554.401 512.849   2
 -13   1 -26 282.380 549.843   1
  -1 -12  29-638.290 517.160   2
  -1 -12  32-1163.84 648.172   2
 -13   1 -32-2810.19 1193.54   1
  -1 -12  35-232.048 501.379   2
  13   0 -32 91.7040 449.729   3
   0 -13 -32-69.0400 448.012   1
 -13   0  32 186.168 436.868   2
   0 -13 -29 2238.50 914.551   1
  13   0 -29 696.001 665.655   3
  13   0 -26 3066.24 1010.44   3
   0 -13 -26 1988.03 862.726   1
 -13  13 -26 182.618 485.698   1
  13   0 -23 2052.97 876.961   3
 -13  13 -23 1261.15 790.798   1
   0 -13 -23 1774.96 818.057   1
   0 -13 -20 13247.5 1704.05   1
 -13  13 -20 15012.1 1944.58   1
  13   0 -20 12674.9 1803.22   3
 -13  13 -17 15178.9 1901.27   1
  13   0 -17 14784.7 1903.48   3
   0 -13 -17 15856.8 1771.25   1
  13   0 -14 11108.2 1639.62   3
   0 -13 -14 10911.5 1360.26   1
 -13  13 -14 10515.4 1526.00   1
  13   0 -11 25231.7 2432.52   3
 -13  13 -11 24852.6 2096.36   1
  13 -13  11 24810.3 1580.24   3
 -13   0  11 24109.8 1995.89   1
   0 -13 -11 25559.9 1949.69   1
  13   0  -8 17598.5 2034.19   3
  13 -13   8 18165.9 1329.62   3
 -13  13  -8 15446.1 921.665   2
   0 -13  -8 17841.2 1541.74   1
 -13  13  -8 14983.3 1543.38   1
 -13   0   8 17281.0 1748.75   1
   0 -13  -5 5305.04 808.478   1
  13 -13   5 6188.23 759.298   3
  13   0  -5 4684.63 1039.52   3
 -13  13  -5 4511.58 397.875   2
 -13   0   5 5137.61 955.800   1
  13   0  -2 10217.5 1535.83   3
  13 -13   2 10550.2 1008.52   3
   0 -13  -2 10546.1 1028.68   1
 -13   0   2 10839.6 1468.70   1
   0  13   2 9626.11 1026.09   3
  13 -13  -1 11890.3 1110.80   3
 -13   0  -1 11824.6 1587.42   1
   0  13  -1 12679.5 1076.62   3
  13   0   1 11425.5 1661.20   3
   0 -13   1 12158.2 989.228   1
 -13  13   1 10407.2 515.829   2
   0  13  -4 3470.43 517.469   3
 -13   0  -4 2727.71 837.009   1
   0  13  -4 3692.78 529.394   1
  13   0   4 3642.35 935.005   3
  13 -13  -4 3183.46 613.360   3
 -13  13   4 3045.02 357.351   2
   0 -13   4 3688.14 461.018   1
   0  13  -7 558.637 181.230   1
 -13   0  -7 170.157 450.612   1
  13   0   7 103.507 286.170   3
 -13  13   7 516.418 196.951   2
  13 -13  -7 336.478 273.236   3
   0  13  -7 98.0734 191.374   3
   0  13 -10 3131.04 482.038   3
 -13   0 -10 2969.25 817.546   1
 -13  13  10 3112.86 515.463   2
  13 -13 -10 3162.36 688.003   3
 -13   0 -13 10435.8 1581.41   1
 -13  13  13 10745.0 1039.29   2
  13 -13 -13 11502.7 1352.31   3
   0  13 -13 10482.4 931.139   3
 -13  13  16 3341.37 625.216   2
 -13   0 -16 3917.67 1018.57   1
   0  13 -16 4231.48 658.900   3
  13 -13 -16 3605.24 779.460   3
   0  13 -19 7741.08 945.075   3
 -13   0 -19 6137.16 1340.91   1
  13 -13 -19 6306.37 1144.78   3
   0 -13  22 3547.08 787.920   2
 -13   0 -22 3411.38 1046.74   1
 -13   0 -25-600.587 697.801   1
   0 -13  25-108.662 350.301   2
 -13   0 -28-164.625 674.945   1
   0 -13  28 99.2014 361.061   2
 -13   0 -31-1306.35 875.174   1
   0 -13  31-292.863 492.580   2
   0 -13  34-235.897 463.651   2
   1 -14  36 61.6796 376.470   2
   1 -14  33-519.936 496.905   2
 -13  -1 -30-223.527 721.300   1
   1 -14  30-691.726 503.829   2
 -13  -1 -27-84.5658 561.230   1
   1 -14  27 136.936 339.124   2
 -13  -1 -24 301.810 561.727   1
   1 -14  24-151.820 360.495   2
 -14  13  21-97.9803 316.990   2
   1 -14  21-367.750 515.413   2
 -13  -1 -21 410.137 585.846   1
  14 -13 -21 536.680 446.361   3
 -14  13  18 7880.12 1075.38   2
 -13  -1 -18 10249.1 1744.36   1
  14 -13 -18 9153.32 1367.15   3
 -13  -1 -15 31877.3 2939.28   1
 -14  13  15 28457.5 1865.48   2
  -1  14 -15 33270.3 1693.91   3
  14 -13 -15 30672.1 2363.43   3
 -13  -1 -12 19396.2 2221.50   1
 -14  13  12 17699.6 1346.37   2
  -1  14 -12 20015.4 1181.16   3
  14 -13 -12 18866.2 1771.22   3
 -13  -1  -9 15025.7 1856.22   1
 -14  13   9 13945.1 1076.98   2
  -1  14  -9 14310.5 924.923   3
  14 -13  -9 14795.5 1483.16   3
  -1  14  -6 9906.50 741.351   3
 -13  -1  -6 9184.25 1449.76   1
  13   1   6 10276.8 1575.51   3
 -14  13   6 8763.08 754.052   2
  14 -13  -6 9431.29 1144.69   3
  14 -13  -3 345.105 230.654   3
  -1  14  -3 428.982 181.685   3
 -13  -1  -3 310.345 451.037   1
  13   1   3 584.493 449.585   3
  14 -13   0 1498.44 425.984   3
 -13  -1   0 1633.56 636.850   1
   1 -14   0 1293.41 327.148   1
  -1  14   0 1400.17 356.104   3
  13   1   0 1487.87 587.804   3
  14 -13   3 6366.85 850.446   3
  13   1  -3 7697.42 1380.30   3
 -13  -1   3 6314.07 1162.37   1
   1 -14  -3 7104.03 895.235   1
  13   1  -6 13225.3 1814.92   3
  14 -13   6 12587.2 1174.82   3
 -13  -1   6 13919.4 1619.78   1
   1 -14  -6 13033.8 1319.12   1
 -14  13  -6 10349.0 1246.52   1
  13   1  -9 56972.5 3737.59   3
   1 -14  -9 54147.5 2797.87   1
  14 -13   9 54814.2 2488.18   3
 -14  13  -9 50483.4 3004.73   1
 -13  -1   9 52175.9 3075.25   1
  13   1 -12 58194.6 3803.37   3
   1 -14 -12 62332.0 3168.37   1
 -14  13 -12 62426.5 3595.98   1
  14 -13  12 59295.5 2651.78   3
 -13  -1  12 60779.7 3264.20   1
 -14  13 -15 31859.1 2798.03   1
   1 -14 -15 29166.4 2335.52   1
 -13  -1  15 27199.1 2134.33   1
  13   1 -15 29204.9 2716.42   3
 -14  13 -18 29581.4 2775.60   1
   1 -14 -18 24653.0 2269.29   1
  13   1 -18 24056.5 2478.57   3
   1 -14 -21 4243.44 1074.72   1
  13   1 -21 4687.47 1137.60   3
 -14  13 -21 4175.38 1169.19   1
   1 -14 -24 236.620 504.029   1
 -14  13 -24 101.656 501.822   1
  13   1 -24 715.384 674.671   3
  13   1 -27 1795.57 857.161   3
   1 -14 -27 343.189 600.035   1
 -14  13 -27-342.704 639.038   1
  13   1 -30 320.387 427.371   3
   1 -14 -30 528.259 724.147   1
   2 -14  34 138.526 366.458   2
 -12  -2 -31 126.006 561.681   1
   2 -14  31 250.847 407.747   2
 -12  -2 -28 826.327 747.022   1
   2 -14  28 1707.60 659.598   2
 -12  -2 -25 1078.62 802.976   1
   2 -14  25 787.337 472.617   2
 -14  12  25 87.8394 341.333   2
  14 -12 -25 741.967 580.083   3
 -12  -2 -22 417.249 639.808   1
 -14  12  22 37.8158 295.670   2
   2 -14  22-645.178 495.499   2
  14 -12 -22 988.408 648.173   3
 -12  -2 -19 4189.60 1163.33   1
  14 -12 -19 3318.67 906.689   3
 -14  12  19 2629.99 661.215   2
   2 -14  19 3357.94 703.659   2
 -12  -2 -16 29321.8 2742.10   1
 -14  12  16 26100.5 1871.45   2
  14 -12 -16 27272.7 2259.18   3
  14 -12 -13 27349.2 2159.97   3
 -12  -2 -13 29106.6 2670.31   1
 -14  12  13 27748.2 1768.34   2
  14 -12 -10 15965.6 1562.11   3
 -12  -2 -10 18010.8 2042.26   1
 -14  12  10 16291.3 1230.46   2
  -2  14 -10 17665.7 934.846   3
  14 -12  -7 1688.11 490.754   3
 -12  -2  -7 1102.30 474.391   1
  -2  14  -7 2528.30 358.132   1
  -2  14  -7 1825.07 269.061   3
 -12  -2  -4 24000.9 2279.89   1
  12   2   4 24344.8 2394.53   3
  -2  14  -4 24781.3 1329.61   1
  -2  14  -4 23284.3 954.214   3
  14 -12  -4 23347.2 1758.02   3
  14 -12  -1 41044.2 2262.53   3
 -12  -2  -1 40600.8 2891.23   1
  -2  14  -1 44251.4 1533.57   3
  12   2   1 40557.6 3105.73   3
 -12  -2   2 12512.7 1606.10   1
  14 -12   2 11652.2 1204.08   3
  12   2  -2 11616.0 1673.78   3
   2 -14  -2 11988.5 1101.71   1
  -2  14   2 11524.7 956.581   3
 -12  -2   5 208.272 284.974   1
  14 -12   5 32.5849 239.327   3
   2 -14  -5 46.2557 227.870   1
  12   2  -5-444.023 582.626   3
  14 -12   8 18833.4 1524.63   3
 -12  -2   8 17357.7 1724.37   1
   2 -14  -8 19576.4 1635.04   1
 -14  12  -8 16479.3 1705.20   1
  12   2  -8 18417.4 2083.27   3
  12   2 -11 30869.2 2660.72   3
  14 -12  11 30502.9 1949.39   3
   2 -14 -11 32209.5 2227.48   1
 -12  -2  11 30317.0 2227.05   1
 -14  12 -11 32474.2 2521.09   1
  12   2 -14 20264.5 2190.39   3
   2 -14 -14 18429.2 1823.68   1
 -14  12 -14 20339.5 2153.38   1
 -12  -2  14 18812.6 1727.91   1
 -14  12 -17 6384.80 1264.20   1
   2 -14 -17 5820.10 1053.56   1
  12   2 -17 6491.09 1248.24   3
  12   2 -20 23.4379 319.158   3
 -14  12 -20-774.153 792.425   1
   2 -14 -20-848.516 751.125   1
  12   2 -23 2763.51 903.015   3
 -14  12 -23 2539.58 901.913   1
   2 -14 -23 1293.75 572.717   1
 -14  12 -26-935.076 789.088   1
   2 -14 -26-166.246 604.327   1
  12   2 -26 623.901 541.786   3
  12   2 -29 591.401 564.361   3
 -14  12 -29 201.658 453.562   1
   2 -14 -29-23.8199 496.288   1
   2 -14 -32 467.226 618.956   1
 -12  -2  32-768.294 601.258   2
  12   2 -32 675.749 524.345   3
 -11  -3 -32 964.986 841.599   1
   3 -14  32 1085.01 615.101   2
 -11  -3 -29 624.641 640.648   1
 -14  11  29 99.7667 317.990   2
   3 -14  29 829.884 498.292   2
 -11  -3 -26-1003.35 792.031   1
 -14  11  26-200.558 387.544   2
   3 -14  26 231.195 341.295   2
  14 -11 -26-76.9676 472.538   3
  14 -11 -23 1720.12 757.696   3
 -14  11  23 696.366 424.071   2
   3 -14  23 949.233 469.708   2
 -14  11  20 7945.77 1163.87   2
   3 -14  20 9321.47 1141.59   2
 -11  -3 -20 12541.0 1907.94   1
  14 -11 -20 9657.46 1459.65   3
 -14  11  17 7771.70 1050.46   2
 -11  -3 -17 9726.45 1582.89   1
   3 -14  17 8708.27 1036.36   2
  14 -11 -17 8610.75 1314.41   3
  14 -11 -14 10790.4 1399.18   3
 -11  -3 -14 10728.8 1596.52   1
 -14  11  14 9273.39 1061.72   2
  14 -11 -11 3237.05 727.372   3
 -11  -3 -11 3256.14 892.787   1
  14 -11  -8 2333.69 578.413   3
 -11  -3  -8 3474.60 943.617   1
  -3  14  -8 3193.34 384.808   1
  14 -11  -5 1993.14 574.668   3
 -11  -3  -5 1776.11 596.530   1
  11   3   5 1645.36 630.481   3
  -3  14  -5 1665.87 171.925   3
  -3  14  -5 2490.43 403.380   1
  -3  14  -2 6880.30 426.178   3
  14 -11  -2 7586.41 1025.21   3
 -11  -3  -2 5907.22 1054.31   1
  11   3   2 7152.51 1279.22   3
  14 -11   1 1555.18 463.503   3
 -11  -3   1 1762.60 590.302   1
  11   3  -1 1369.66 651.208   3
  -3  14   1 1146.78 252.262   3
   3 -14  -4 879.030 341.657   1
 -11  -3   4 1048.43 464.806   1
  11   3  -4 669.735 428.168   3
  14 -11   4 1429.45 442.366   3
 -11  -3   7 395.457 252.160   1
  11   3  -7 598.156 429.594   3
  14 -11   7 702.138 337.264   3
   3 -14  -7 512.595 262.829   1
 -14  11  -7 248.876 305.046   1
 -14  11 -10 5873.83 1067.16   1
  11   3 -10 5999.21 1178.54   3
   3 -14 -10 6190.29 953.371   1
  14 -11  10 5615.32 870.848   3
 -11  -3  10 5986.02 969.147   1
  11   3 -13 5103.07 1101.65   3
 -14  11 -13 5048.66 1070.90   1
   3 -14 -13 4849.48 904.222   1
 -11  -3  13 4781.12 864.873   1
   3 -14 -16 1039.39 502.094   1
 -14  11 -16-39.5696 518.163   1
 -11  -3  16 712.938 382.263   1
  11   3 -19-231.678 534.345   3
   3 -14 -19 276.676 398.733   1
 -14  11 -19 709.183 549.423   1
  11   3 -22-229.377 519.493   3
 -14  11 -22 668.584 638.993   1
   3 -14 -25-1215.54 682.741   1
 -14  11 -25-116.446 445.094   1
  11   3 -25 21.4542 362.489   3
   3 -14 -28-930.144 620.457   1
  11   3 -28-16.7559 371.595   3
 -14  11 -28-352.177 653.405   1
   3 -14 -31-45.5706 525.823   1
 -11  -3  31-1022.30 645.892   2
 -14  11 -31-738.836 696.082   1
  11   3 -31 102.168 447.587   3
  11   3 -34 714.394 568.195   3
 -10  -4 -33 1206.48 978.867   1
 -14  10  33 714.985 552.250   2
 -10  -4 -30-890.142 746.690   1
   4 -14  30 146.215 340.038   2
 -14  10  30-289.694 448.239   2
   4 -14  27 806.340 454.319   2
 -14  10  27 153.004 359.270   2
 -10  -4 -27-505.809 743.149   1
  14 -10 -27 359.818 513.882   3
 -10  -4 -24 6194.62 1415.11   1
  14 -10 -24 5806.21 1252.97   3
   4 -14  24 5871.37 1007.79   2
 -14  10  24 5532.69 1113.21   2
   4 -14  21 13950.8 1414.40   2
 -14  10  21 11939.5 1499.21   2
  14 -10 -21 13179.5 1729.61   3
 -10  -4 -21 17387.2 2201.36   1
   4 -14  18 20112.4 1561.48   2
 -14  10  18 17373.3 1615.43   2
 -10  -4 -18 23798.2 2438.88   1
  14 -10 -18 19601.0 1971.15   3
  14 -10 -15 13455.1 1566.14   3
   4 -14  15 14429.6 1234.24   2
 -10  -4 -15 12060.3 1673.57   1
   4 -14  12 2121.54 312.429   3
  14 -10 -12 2287.65 663.420   3
 -10  -4 -12 2497.02 738.524   1
  14 -10  -9 83.2387 338.259   3
  -4  14  -9 798.682 183.945   1
 -10  -4  -9 345.907 353.937   1
  14 -10  -6 5228.50 905.635   3
  -4  14  -6 5579.41 581.172   1
 -10  -4  -6 4980.17 954.417   1
  14 -10  -3 746.800 338.621   3
 -10  -4  -3 510.137 296.258   1
  10   4   3 1447.75 515.285   3
  -4  14  -3 808.223 251.968   1
  14 -10   0 17529.4 1582.98   3
 -10  -4   0 15468.2 1596.49   1
  -4  14   0 15576.7 609.505   3
  10   4   0 16862.6 1913.60   3
  -4  14   0 15099.4 572.279   3
 -10  -4   3 32519.4 2289.09   1
  10   4  -3 33694.8 2682.92   3
  -4  14   3 32492.2 1221.64   3
  14 -10   3 33476.8 2130.20   3
  10   4  -6 24571.4 2271.42   3
 -10  -4   6 25459.9 2031.02   1
   4 -14  -6 27686.1 1785.72   1
  14 -10   6 27972.2 1957.20   3
  -4  14   6 25998.5 1325.23   3
 -14  10  -6 23682.4 2011.49   1
  10   4  -9 14837.6 1747.15   3
  14 -10   9 13958.5 1392.29   3
   4 -14  -9 14222.5 1396.65   1
 -14  10  -9 14770.9 1695.98   1
 -10  -4   9 13344.7 1409.78   1
   4 -14 -12 12269.0 1385.10   1
 -10  -4  12 10939.3 1237.02   1
 -14  10 -12 11657.8 1584.53   1
  10   4 -12 11006.9 1502.13   3
  10   4 -15 755.447 305.937   3
 -14  10 -15 1507.01 681.084   1
 -10  -4  15 1265.12 466.996   1
   4 -14 -15 2085.46 646.526   1
  10   4 -18 1814.18 631.970   3
 -14  10 -18 3336.38 1006.03   1
 -10  -4  18 2711.13 623.485   1
   4 -14 -18 3727.96 887.980   1
   4 -14 -21 9685.98 1456.89   1
  10   4 -21 8550.38 1394.75   3
 -14  10 -21 9380.42 1636.11   1
   4 -14 -24 1311.28 715.654   1
 -14  10 -24 828.265 650.197   1
  10   4 -24 1453.17 648.592   3
  10   4 -27 208.493 400.816   3
   4 -14 -27 45.2518 561.011   1
  10   4 -30 2289.34 889.559   3
   4 -14 -30 2066.42 835.384   1
 -10  -4  30 1858.93 796.843   2
 -14  10 -30 2220.46 1085.24   1
 -14  10 -33-1146.04 830.680   1
   4 -14 -33-6.00634 414.144   1
 -10  -4  33-333.155 476.776   2
  10   4 -33 170.225 432.952   3
 -14   9  34 88.9623 352.277   2
  -9  -5 -34-1187.16 795.446   1
  -9  -5 -31-880.858 728.173   1
 -14   9  31-54.7115 325.456   2
  -9  -5 -28-194.973 699.313   1
 -14   9  28 600.923 501.462   2
  14  -9 -28 646.886 541.193   3
  -9  -5 -25 1042.62 692.215   1
   5 -14  25 833.652 429.241   2
 -14   9  25 1114.88 594.049   2
  14  -9 -25 1671.05 747.414   3
  14  -9 -22 4917.10 1094.38   3
  -9  -5 -22 5102.60 1178.79   1
   5 -14  22 4204.81 753.953   2
 -14   9  22 4203.28 904.366   2
   5 -14  19 4073.70 703.146   2
  -9  -5 -19 4092.80 1030.22   1
  14  -9 -19 4980.70 1055.35   3
 -14   9  19 3921.18 792.251   2
  -9  -5 -16 5482.51 1151.76   1
   5 -14  16 5211.20 735.242   2
  14  -9 -16 5008.96 1006.29   3
  -5  14 -13 6030.83 546.631   1
   5 -14  13 6461.87 742.134   2
  -9  -5 -13 7585.21 1232.74   1
  14  -9 -13 5940.71 1039.38   3
  14  -9 -10 2904.66 699.614   3
  -5  14 -10 3093.86 461.343   1
  -9  -5 -10 3412.64 814.473   1
  -5  14 -10 2634.39 354.144   1
  14  -9  -7 19333.8 1772.02   3
  -9  -5  -7 19552.6 1866.26   1
  -5  14  -7 18414.8 1038.17   1
  14  -9  -4 14073.0 1469.73   3
  -9  -5  -4 13051.1 1453.19   1
   9   5   4 11064.7 1530.24   3
  -5  14  -4 12184.8 931.288   1
  14  -9  -1 13962.0 1463.87   3
  -9  -5  -1 11961.6 1345.69   1
   9   5   1 13521.9 1672.14   3
  14  -9   2 38879.0 2393.10   3
  -9  -5   2 37479.2 2344.82   1
   9   5  -2 38433.8 2797.64   3
  -5  14   2 37919.3 1019.20   3
  -9  -5   5 34228.4 2191.03   1
  -5  14   5 35784.8 1373.64   3
  14  -9   5 37991.2 2350.67   3
 -14   9  -5 33073.9 2397.01   1
   9   5  -5 34988.8 2617.39   3
  -9  -5   8 41815.8 2392.14   1
 -14   9  -8 42833.8 2849.12   1
   9   5  -8 41418.2 2822.65   3
  14  -9   8 43311.8 2528.31   3
  -5  14   8 40706.6 1781.34   3
   9   5 -11 41737.6 2839.89   3
  -9  -5  11 42125.7 2319.93   1
 -14   9 -11 39125.6 2949.72   1
   5 -14 -11 41746.6 2457.57   1
   9   5 -14 32348.6 2478.55   3
 -14   9 -14 35728.2 2948.53   1
   5 -14 -14 35967.1 2401.13   1
  -9  -5  14 32699.2 1980.07   1
   5 -14 -17 28707.1 2258.18   1
  -9  -5  17 23482.3 1682.39   1
   9   5 -17 24426.5 2192.14   3
   5 -14 -20 16123.5 1844.27   1
 -14   9 -20 16969.4 2202.31   1
   9   5 -20 14127.9 1729.79   3
   5 -14 -23 9282.16 1551.49   1
 -14   9 -23 10613.1 1882.37   1
   9   5 -23 10533.2 1535.09   3
   5 -14 -26 5121.28 1241.78   1
   9   5 -26 3326.40 1007.01   3
 -14   9 -26 1724.46 886.288   1
   9   5 -29 1495.92 740.176   3
   5 -14 -29 1784.57 831.442   1
 -14   9 -29 797.040 717.712   1
   5 -14 -32 763.896 657.232   1
 -14   9 -32-261.695 683.705   1
  -9  -5  32 404.794 499.949   2
   9   5 -32 51.9132 381.992   3
 -14   9 -35-967.068 810.598   1
 -14   8  35-180.986 411.723   2
 -14   8  32-181.864 397.633   2
  -8  -6 -32-1220.28 778.815   1
  -8  -6 -29 366.692 615.124   1
 -14   8  29 699.856 461.386   2
  14  -8 -29 840.213 651.710   3
  -8  -6 -26 3230.64 1071.56   1
 -14   8  26 2896.74 878.097   2
  14  -8 -26 3889.42 1093.80   3
  -8  -6 -23 3285.49 1045.45   1
 -14   8  23 2627.57 758.677   2
  14  -8 -23 2915.07 859.644   3
  -8  -6 -20 3526.33 917.936   1
   6 -14  20 3133.90 614.099   2
 -14   8  20 3357.42 774.464   2
  14  -8 -20 4032.32 981.665   3
  -8  -6 -17 243.702 520.137   1
   6 -14  17 1129.30 313.163   2
  14  -8 -17 1144.79 508.378   3
  14  -8 -14 1122.04 475.196   3
  -6  14 -14 1931.20 382.762   1
  -8  -6 -14 1495.50 569.422   1
   6 -14  14 1657.37 375.499   2
   6 -14  11 17141.5 1064.81   2
  -8  -6 -11 19180.9 1894.33   1
  -6  14 -11 18742.4 1234.26   1
  -6  14 -11 15883.3 922.595   1
  14  -8 -11 16880.7 1734.28   3
  14  -8  -8 23987.3 2054.72   3
  -6  14  -8 24520.7 1219.15   1
   6 -14   8 23666.1 1083.35   2
  -8  -6  -8 27717.7 2123.98   1
  14  -8  -5 41809.3 2615.55   3
  -8  -6  -5 39860.0 2451.13   1
  14  -8  -2 37611.1 2457.26   3
   8   6   2 36282.5 2685.08   3
  -8  -6  -2 39045.3 2333.16   1
  14  -8   1 18834.6 1700.18   3
   8   6  -1 16836.8 1822.25   3
  -8  -6   1 16989.4 1500.17   1
   8   6  -4 5815.86 1053.48   3
  -8  -6   4 5337.47 794.368   1
  14  -8   4 6474.26 1030.28   3
 -14   8  -4 4772.41 896.979   1
  -6  14   4 5330.12 468.196   3
   8   6  -7 1368.39 517.088   3
  -8  -6   7 1686.30 447.268   1
  14  -8   7 1781.60 541.259   3
   6 -14  -7 1530.31 299.086   2
  -6  14   7 1693.68 340.862   3
 -14   8  -7 1211.97 542.112   1
   8   6 -10 8858.61 1277.14   3
  -8  -6  10 8154.44 946.386   1
   6 -14 -10 7346.31 768.471   2
 -14   8 -10 9758.60 1463.82   1
 -14   8 -13 34556.4 2871.81   1
   8   6 -13 29780.2 2316.87   3
  -8  -6  13 30794.1 1854.50   1
 -14   8 -16 46446.2 3474.83   1
   6 -14 -16 43922.1 2695.88   1
   8   6 -16 38752.4 2633.65   3
  -8  -6  16 37846.6 1947.21   1
 -14   8 -19 41524.8 3363.16   1
   6 -14 -19 37083.7 2619.64   1
 -14   8 -22 12407.2 1980.02   1
   6 -14 -22 12087.1 1660.43   1
   8   6 -22 10466.7 1487.72   3
   6 -14 -25 4437.73 1106.38   1
 -14   8 -25 3050.92 1174.67   1
   8   6 -25 4006.47 982.172   3
   8   6 -28-189.385 443.594   3
   6 -14 -28 745.746 704.428   1
 -14   8 -28-13.7077 539.447   1
   6 -14 -31 758.039 611.360   1
  -8  -6  31 184.862 360.502   2
   8   6 -31 501.456 459.961   3
 -14   8 -31 100.959 662.781   1
 -14   8 -34-2454.74 1142.15   1
  -8  -6  34-318.306 556.893   2
 -14   8 -37-2043.18 1087.46   1
 -14   7  33-106.617 405.288   2
  -7  -7 -33 151.692 570.915   1
 -14   7  30-94.0985 344.983   2
  -7  -7 -30 114.507 567.932   1
  14  -7 -30 886.307 664.256   3
  14  -7 -27 2173.75 856.927   3
  -7  -7 -27 2891.56 1075.34   1
 -14   7  27 2283.28 809.826   2
  -7  -7 -24 6062.41 1351.12   1
 -14   7  24 4870.71 1063.68   2
  14  -7 -24 5019.23 1182.99   3
  -7  -7 -21 7755.35 1424.08   1
  14  -7 -21 7235.06 1286.16   3
  -7  -7 -18 20382.6 2095.82   1
  14  -7 -18 22551.2 2174.92   3
  -7  -7 -15 15272.5 1743.93   1
  -7  14 -15 17383.4 1340.76   1
  14  -7 -15 16220.6 1784.01   3
   7 -14  12 13482.7 606.441   3
  14  -7 -12 15842.0 1743.63   3
  -7  14 -12 16591.7 1322.78   1
   7 -14  12 13813.6 944.264   2
  14  -7  -9 24566.9 2122.00   3
   7 -14   9 22198.4 992.530   2
  -7  -7  -9 26629.3 2068.21   1
  14  -7  -6 10468.1 1368.31   3
   7 -14   6 9228.91 502.810   2
  -7  -7  -6 9952.70 1203.02   1
  14  -7  -3 12521.6 1455.04   3
   7   7   3 10867.3 1455.51   3
  -7  -7  -3 11562.7 1217.78   1
  14  -7   0 11730.3 1405.78   3
   7   7   0 10988.7 1433.09   3
  -7  -7   0 10231.2 1098.77   1
  -7  14   3 2127.22 263.550   3
   7   7  -3 1705.04 585.633   3
  14  -7   3 2067.85 620.210   3
   7 -14  -3 1820.92 210.394   2
  -7  -7   3 2160.52 491.613   1
 -14   7  -3 1534.35 521.007   1
  -7  14   6 5199.32 545.924   3
   7   7  -6 4972.99 942.286   3
  -7  -7   6 5207.48 705.980   1
  14  -7   6 5226.71 956.165   3
   7 -14  -6 4668.73 448.637   2
 -14   7  -6 4272.80 924.579   1
 -14   7  -9 13549.8 1699.11   1
   7   7  -9 12682.7 1459.30   3
  -7  -7   9 12627.7 1049.92   1
  14  -7   9 11902.9 1408.74   3
   7 -14  -9 10545.4 820.944   2
 -14   7 -12 7287.87 1360.03   1
  -7  -7  12 7351.27 767.079   1
   7   7 -12 7421.36 1131.12   3
  -7  -7  15 13756.0 1015.56   1
 -14   7 -15 15840.5 2043.65   1
   7   7 -15 13870.0 1520.94   3
 -14   7 -18 29644.5 2816.87   1
   7   7 -18 22811.1 1967.33   3
 -14   7 -21 15670.4 2185.19   1
   7   7 -21 9392.94 1346.69   3
 -14   7 -24 1969.32 951.660   1
   7   7 -24 2275.67 739.642   3
   7   7 -27-213.837 436.631   3
 -14   7 -27-1095.00 809.379   1
 -14   7 -30-1737.31 945.738   1
  -7  -7  30-867.171 593.220   2
   7   7 -30-389.605 451.382   3
  -7  -7  33-1389.06 724.756   2
 -14   7 -36-1929.50 1066.34   1
  -6  -8 -34 1704.39 930.500   1
 -14   6  34 334.776 573.465   2
  14  -6 -34 321.174 502.829   3
 -14   6  31 682.273 605.156   2
  14  -6 -31 1305.77 780.155   3
  -6  -8 -31 807.062 892.718   1
  14  -6 -28 1221.38 798.993   3
 -14   6  28 1078.83 668.041   2
  -6  -8 -28 2397.97 1133.04   1
  14  -6 -25 4102.62 1106.09   3
  -6  -8 -25 2686.68 1023.84   1
 -14   6  25 4173.11 1015.92   2
  -6  -8 -22 16388.0 1993.53   1
  14  -6 -22 15360.8 1940.11   3
  -6  -8 -19 20190.7 2108.11   1
  14  -6 -19 23099.7 2291.41   3
  -8  14 -16 45703.9 2386.13   1
  -6  -8 -16 45722.8 3033.08   1
  14  -6 -16 41357.8 2904.39   3
  -6  -8 -13 43395.3 2758.12   1
  -8  14 -13 39961.1 2222.02   1
   8 -14  13 36349.2 1292.79   3
  14  -6 -13 37825.9 2755.03   3
  -6  -8 -10 33045.4 2324.09   1
  14  -6 -10 33120.4 2531.95   3
  -8  14 -10 32152.7 1856.67   1
  14  -6  -7 19707.1 1949.49   3
  -6  -8  -7 22640.5 1795.65   1
  -6  -8  -4 1495.59 439.451   1
  14  -6  -4 1232.99 511.800   3
 -14   6   1 746.509 427.398   1
  -6  -8  -1 709.785 319.147   1
  14  -6  -1 49.9266 320.310   3
   6   8   1 355.204 328.254   3
  -8  14   2 1462.10 217.483   3
   6   8  -2 2001.99 609.614   3
  14  -6   2 1356.93 522.755   3
  -6  -8   2 1494.75 412.248   1
 -14   6  -2 1031.51 447.024   1
   6   8  -5 16113.7 1602.66   3
  -8  14   5 17077.1 920.371   3
 -14   6  -5 16675.3 1752.34   1
  14  -6   5 17997.9 1768.05   3
  -6  -8   5 16763.8 1188.25   1
  -8  14   8 21853.1 1266.41   3
   6   8  -8 23602.4 1889.19   3
  14  -6   8 23065.7 1991.91   3
  -6  -8   8 22751.0 1269.70   1
 -14   6  -8 23232.8 2212.23   1
   6   8 -11 42137.9 2496.94   3
 -14   6 -11 43962.2 3285.70   1
  -6  -8  11 39135.5 1501.06   1
  -6  -8  14 33267.6 1226.96   1
   6   8 -14 35623.6 2310.58   3
 -14   6 -17 13621.5 1931.23   1
   6   8 -17 9676.95 1251.06   3
   6   8 -20 2627.69 735.889   3
 -14   6 -20 3579.62 1106.32   1
   6   8 -23-73.1970 295.609   3
 -14   6 -23-559.385 742.928   1
 -14   6 -26-1241.98 883.538   1
   6   8 -26-78.9046 318.928   3
 -14   6 -29-1026.81 808.380   1
   6   8 -29 651.033 529.484   3
  -6  -8  29-500.620 500.710   2
 -14   6 -32-2477.90 1131.20   1
  -6  -8  32-709.393 542.459   2
 -14   6 -35-2239.07 1111.77   1
 -14   5  32 199.345 443.163   2
  14  -5 -32 1315.87 800.722   3
  -5  -9 -29 2305.15 1030.68   1
 -14   5  29 1243.70 668.446   2
  14  -5 -29 1524.40 792.089   3
 -14   5  26 1256.33 612.577   2
  -5  -9 -26 4039.21 1229.71   1
  14  -5 -26 3123.16 1007.71   3
  -5  -9 -23 3677.39 1050.01   1
  14  -5 -23 3274.61 973.518   3
  14  -5 -20 13909.5 1829.15   3
  -5  -9 -20 12022.4 1664.50   1
  -9  14 -20 15194.5 1513.27   1
  14  -5 -17 20340.0 2109.05   3
  -5  -9 -17 18821.9 1933.42   1
  -9  14 -17 21438.2 1781.81   1
  -9  14 -14 37107.9 2351.24   1
  -5  -9 -14 37475.6 2589.81   1
  14  -5 -14 34119.6 2712.00   3
  -5  -9 -11 38195.1 2474.90   1
   9 -14  11 33526.3 1060.88   3
  -9  14 -11 36274.0 2161.50   1
  14  -5 -11 37777.1 2763.12   3
   9 -14  11 32338.8 1056.10   3
  -5  -9  -8 53239.4 2748.18   1
  14  -5  -8 51048.1 3181.14   3
  14  -5  -5 35709.9 2619.25   3
  -5  -9  -5 34354.9 2077.81   1
  14  -5  -2 11299.2 1454.79   3
   5   9   2 10187.9 1321.04   3
 -14   5   2 9995.73 1259.84   1
  -5  -9  -2 11014.8 1102.13   1
  14  -5   1 6874.87 1158.96   3
   5   9  -1 7375.79 1095.96   3
  -5  -9   1 7372.99 849.933   1
 -14   5  -1 6277.13 1076.21   1
 -14   5  -4 1010.42 498.601   1
  -5  -9   4 1024.28 315.506   1
  -9  14   4 844.322 202.531   3
   5   9  -4 649.350 295.964   3
  14  -5   4 595.881 293.643   3
   5   9  -4 828.439 277.419   1
  -9  14   7 11341.7 877.184   3
   5   9  -7 11483.5 1273.61   3
  14  -5   7 12210.3 1490.63   3
  -5  -9   7 11891.7 857.683   1
 -14   5  -7 12560.3 1623.97   1
   5   9 -10 24297.2 1807.32   3
  -5  -9  10 21274.5 951.980   1
 -14   5 -13 31474.6 2837.08   1
   5   9 -13 25691.3 1889.35   3
 -14   5 -16 42638.5 3429.46   1
   5   9 -16 36653.7 2326.04   3
 -14   5 -19 16532.1 2207.51   1
   5   9 -19 13643.5 1484.26   3
   5   9 -22 1765.86 606.844   3
 -14   5 -22 2132.08 836.568   1
 -14   5 -25 144.482 591.090   1
   5   9 -25 452.267 409.310   3
   5   9 -28 403.863 446.106   3
 -14   5 -28 46.5283 529.992   1
  -5  -9  28-699.375 547.415   2
 -14   5 -31-940.877 816.755   1
  -5  -9  31-89.9771 492.577   2
 -14   5 -34-931.065 795.843   1
  -5  -9  34-104.730 418.418   2
  -4 -10 -33-106.087 554.551   1
 -14   4  33-1499.80 746.766   2
  14  -4 -33-15.1767 463.493   3
  14  -4 -30-117.754 443.075   3
  -4 -10 -30-989.748 747.274   1
 -14   4  30-1499.20 703.974   2
  -4 -10 -27-94.8176 552.317   1
  14  -4 -27-178.604 516.705   3
 -14   4  27-1712.90 711.034   2
  14  -4 -24-389.123 521.155   3
  -4 -10 -24-168.521 628.734   1
  -4 -10 -21 575.404 512.334   1
 -10  14 -21 580.230 387.350   1
  14  -4 -21 1103.07 586.577   3
 -10  14 -18 14611.3 1624.37   1
  -4 -10 -18 11521.1 1518.11   1
  14  -4 -18 12884.0 1727.46   3
 -10  14 -15 6455.30 1086.66   1
  -4 -10 -15 5961.74 1048.38   1
  14  -4 -15 7108.74 1264.72   3
  -4 -10 -12 8115.58 1132.54   1
  14  -4 -12 8486.01 1340.42   3
  10 -14  12 6723.05 583.129   3
 -10  14 -12 8193.35 1095.11   1
  14  -4  -9 20800.8 2085.36   3
  -4 -10  -9 20730.0 1704.81   1
  10 -14   9 18318.5 799.387   3
 -10  14  -9 19065.2 1551.86   1
  10 -14   9 17535.9 737.144   3
  -4 -10  -6 8666.81 1057.20   1
  14  -4  -6 9338.72 1376.27   3
  14  -4  -3 1307.77 536.497   3
  -4 -10  -3 1366.79 380.090   1
   4  10   3 1792.25 548.450   3
  10 -14   3 1322.44 171.760   3
 -14   4   3 1262.56 491.035   1
   4  10   0 3275.79 723.824   3
  14  -4   0 3998.70 924.338   3
 -14   4   0 3537.99 803.648   1
  -4 -10   0 4091.07 638.746   1
  10 -14   0 3182.72 355.475   3
 -14   4  -3 3641.83 862.281   1
  -4 -10   3 4101.13 551.301   1
   4  10  -3 3680.20 718.503   3
 -10  14   3 3883.67 467.887   3
  14  -4   3 4316.90 937.190   3
   4  10  -3 4825.50 684.050   1
 -14   4  -6 193.615 444.397   1
   4  10  -6 192.127 212.956   3
 -10  14   6 215.384 131.598   3
  -4 -10   6 334.982 145.788   1
  14  -4   6 536.122 365.228   3
   4  10  -6 597.636 224.140   1
 -14   4  -9 10806.8 1640.47   1
  -4 -10   9 9446.56 574.440   1
   4  10  -9 10408.9 1134.65   3
 -14   4 -12 11849.8 1748.87   1
   4  10 -12 8873.42 1060.73   3
 -14   4 -15 6717.16 1403.28   1
   4  10 -15 5909.33 883.272   3
 -14   4 -18 19205.9 2382.28   1
   4  10 -18 16381.8 1539.86   3
 -14   4 -21 5702.86 1353.58   1
   4  10 -21 5554.17 966.871   3
   4  10 -24 2377.68 735.170   3
 -14   4 -24 325.428 635.774   1
   4  10 -27 1111.44 592.424   3
  -4 -10  27 1672.38 693.654   2
 -14   4 -27 862.238 795.697   1
 -14   4 -30-48.6726 647.984   1
  -4 -10  30 281.837 468.876   2
 -14   4 -33-1243.37 902.328   1
  -4 -10  33 178.403 468.091   2
 -14   4 -36 181.632 683.230   1
  -3 -11 -31-204.138 519.334   1
 -14   3  31-254.358 570.533   2
  14  -3 -31 104.404 439.028   3
  14  -3 -28 590.171 458.569   3
  -3 -11 -28-420.160 648.874   1
 -14   3  28 238.032 335.096   2
  -3 -11 -25 1180.95 548.090   1
  14  -3 -25 2169.93 822.429   3
  -3 -11 -22-580.907 713.412   1
 -11  14 -22-47.4419 385.923   1
  14  -3 -22-61.0835 522.261   3
  14  -3 -19 5106.33 1143.89   3
 -11  14 -19 6883.95 1179.20   1
  -3 -11 -19 6320.65 1186.96   1
 -11  14 -16 15275.8 1751.17   1
  -3 -11 -16 14768.2 1672.49   1
  14  -3 -16 12853.7 1717.74   3
  14  -3 -13 12798.6 1706.02   3
  -3 -11 -13 13939.0 1545.63   1
 -11  14 -13 14152.7 1565.99   1
  14  -3 -10 4027.37 948.331   3
  11 -14  10 3683.51 464.449   3
 -11  14 -10 3091.82 675.876   1
  -3 -11 -10 3505.06 720.610   1
  14  -3  -7 549.685 414.379   3
  11 -14   7 569.670 168.563   3
  -3 -11  -7 755.288 334.307   1
  14  -3  -4 12095.5 1631.01   3
  -3 -11  -4 11090.2 1133.63   1
 -14   3   4 10422.7 1348.01   1
  11 -14   4 10279.8 684.185   3
  11 -14   1 6956.77 610.232   3
  14  -3  -1 7873.19 1324.42   3
  -3 -11  -1 7553.28 865.832   1
   3  11   1 6799.67 1018.39   3
 -14   3   1 7541.15 1184.76   1
 -14   3  -2 191.813 333.204   1
  11 -14  -2 234.447 151.736   3
   3  11  -2 162.172 216.984   3
  14  -3   2 415.674 376.317   3
 -11  14   2 144.133 122.483   3
  -3 -11   2 155.119 205.308   1
 -14   3  -5 1593.03 653.173   1
   3  11  -5 1442.77 415.778   3
 -11  14   5 1767.42 367.822   3
  14  -3   5 965.617 457.638   3
  -3 -11   5 1885.84 350.564   1
  11 -14  -5 1877.52 431.883   3
   3  11  -5 2196.13 427.574   1
 -14   3  -8 4168.91 1042.31   1
   3  11  -8 3092.17 589.190   3
  -3 -11   8 3104.20 320.445   1
  14  -3   8 2178.52 577.348   3
  11 -14  -8 3521.76 627.747   3
 -14   3 -11 11997.2 1753.41   1
   3  11 -11 10097.8 1067.88   3
 -14   3 -14 9880.97 1686.02   1
   3  11 -14 6925.28 916.444   3
   3  11 -17 594.271 276.124   3
 -14   3 -17-1498.86 1216.67   1
 -14   3 -20-714.890 844.012   1
   3  11 -20-42.0287 284.179   3
 -14   3 -23 196.766 592.892   1
   3  11 -23 702.512 462.867   3
  -3 -11  26 287.108 414.191   2
   3  11 -26 389.566 402.753   3
 -14   3 -26-140.802 676.593   1
 -14   3 -29-1115.38 858.834   1
  -3 -11  29-461.263 546.679   2
 -14   3 -32-3036.78 1268.18   1
  -3 -11  32-859.798 605.425   2
 -14   3 -35-633.879 770.186   1
  -3 -11  35-221.453 513.289   2
  14  -2 -32 605.894 584.457   3
 -14   2  32-806.310 563.621   2
  -2 -12 -32-219.540 623.052   1
  14  -2 -29 153.126 442.184   3
  -2 -12 -29-311.013 599.087   1
 -14   2  29 139.108 358.380   2
  14  -2 -26 1255.06 666.894   3
  -2 -12 -26 582.253 437.936   1
 -12  14 -23 56.8611 475.075   1
  14  -2 -23 145.876 357.343   3
  -2 -12 -20 1305.68 644.511   1
 -12  14 -20 1047.80 531.794   1
  14  -2 -20 383.080 423.418   3
  14  -2 -17 2428.39 783.096   3
  -2 -12 -17 2868.24 780.546   1
 -12  14 -17 3862.65 938.070   1
  14  -2 -14 12918.3 1780.77   3
  -2 -12 -14 16369.0 1690.88   1
 -12  14 -14 16537.2 1803.76   1
  14  -2 -11 13548.8 1760.23   3
 -12  14 -11 13174.4 1481.01   1
  12 -14  11 13532.0 1021.36   3
  -2 -12 -11 13353.6 1461.17   1
  14  -2  -8 460.162 377.612   3
  -2 -12  -8 392.628 303.924   1
  12 -14   8 491.102 195.087   3
 -12  14  -8 767.388 393.957   1
 -14   2   8 644.304 433.979   1
  -2 -12  -5 423.984 264.571   1
  12 -14   5 900.947 260.657   3
  14  -2  -5 812.027 494.816   3
 -14   2   5 533.596 397.664   1
 -14   2   2 6090.87 1104.43   1
  14  -2  -2 5904.12 1211.10   3
   2  12   2 5036.20 834.244   3
  -2 -12  -2 5594.90 762.677   1
  12 -14   2 5416.21 611.505   3
   2  12  -1 13364.4 1289.93   3
  14  -2   1 14885.8 1848.27   3
  -2 -12   1 13365.6 1058.64   1
  12 -14  -1 12559.8 990.624   3
 -14   2  -1 16393.9 1850.14   1
 -14   2  -4-151.227 459.162   1
   2  12  -4 169.514 164.224   1
  12 -14  -4 211.061 190.486   3
   2  12  -4 235.683 193.590   3
  14  -2   4-204.449 375.374   3
  -2 -12   4 22.2254 154.329   1
   2  12  -7 10977.6 1061.02   3
  -2 -12   7 9750.83 594.402   1
  14  -2   7 12074.4 1635.53   3
   2  12  -7 10838.1 781.443   1
  12 -14  -7 10922.1 1087.30   3
 -14   2  -7 12328.3 1745.40   1
   2  12 -10 12602.1 1126.30   3
 -14   2 -10 13509.0 1835.10   1
  12 -14 -10 13664.7 1330.27   3
 -14   2 -13 20348.3 2345.78   1
  12 -14 -13 18674.6 1697.65   3
   2  12 -13 17664.4 1373.00   3
 -14   2 -16 17188.8 2215.24   1
   2  12 -16 13825.6 1273.73   3
 -14   2 -19 575.472 803.498   1
   2  12 -19 1659.35 458.445   3
   2  12 -22-263.011 461.015   3
 -14   2 -22-3238.58 1172.31   1
 -14   2 -25-198.002 769.812   1
  -2 -12  25 629.011 389.332   2
  -2 -12  28-1249.27 634.330   2
  -2 -12  31-1454.21 689.777   2
 -14   2 -34-2237.01 1117.61   1
  -2 -12  34-1498.01 730.814   2
 -14   1  30 598.956 542.641   2
  14  -1 -30 859.840 760.068   3
  -1 -13 -30-16.1576 459.544   1
  14  -1 -27 3460.54 1097.75   3
  -1 -13 -27 2358.86 996.049   1
 -13  14 -24 6402.84 1377.14   1
  14  -1 -24 6670.10 1464.75   3
  -1 -13 -24 5718.29 1316.47   1
 -13  14 -21 14698.3 1974.16   1
  14  -1 -21 10566.7 1730.41   3
  -1 -13 -21 12955.3 1711.30   1
 -13  14 -18 21281.9 2292.56   1
  -1 -13 -18 19337.9 1998.10   1
  14  -1 -18 17036.5 2150.14   3
  -1 -13 -15 15918.9 1719.06   1
 -13  14 -15 18554.2 2056.87   1
  14  -1 -15 14737.3 1931.36   3
  14  -1 -12 8865.38 1484.91   3
  13 -14  12 9617.09 956.962   3
 -13  14 -12 9077.42 1308.12   1
  -1 -13 -12 8582.72 1184.79   1
  -1 -13  -9 7451.07 1062.93   1
  14  -1  -9 8593.32 1462.58   3
  13 -14   9 8232.52 847.299   3
 -14   1   9 7653.41 1182.27   1
 -13  14  -9 7395.83 1099.68   1
  13 -14   6 9277.56 898.656   3
  14  -1  -6 8759.50 1472.11   3
  -1 -13  -6 9230.74 1089.13   1
 -14   1   6 9550.61 1333.01   1
  -1 -13  -3 12007.3 1160.53   1
  13 -14   3 10936.6 970.436   3
  14  -1  -3 11183.5 1634.09   3
 -14   1   3 11339.2 1491.23   1
   1  13   3 10942.1 1205.62   3
  -1 -13   0 27821.8 1603.86   1
  14  -1   0 29334.1 2654.28   3
   1  13   0 27541.8 1803.20   3
  13 -14   0 26821.7 1563.87   3
 -14   1   0 28632.3 2495.99   1
 -14   1  -3 36007.4 2899.74   1
   1  13  -3 35825.4 1865.19   3
  14  -1   3 36710.3 2957.05   3
  -1 -13   3 32411.6 1515.20   1
  13 -14  -3 32253.0 1801.11   3
   1  13  -6 46339.0 2007.15   3
 -14   1  -6 50078.5 3468.91   1
  14  -1   6 46645.0 3304.44   3
  13 -14  -6 46954.0 2320.00   3
 -14   1  -9 33776.9 2907.92   1
  13 -14  -9 31451.0 2037.31   3
   1  13  -9 31576.2 1656.99   3
 -14   1 -12 11949.3 1768.48   1
  13 -14 -12 12189.8 1365.65   3
   1  13 -12 11105.3 1022.76   3
 -14   1 -15 7399.37 1485.35   1
  13 -14 -15 7744.50 1183.69   3
   1  13 -15 6506.09 843.975   3
 -14   1 -18 940.460 477.430   1
   1  13 -18 1547.30 447.098   3
   1  13 -21 482.626 310.549   3
 -14   1 -21-114.690 673.934   1
  -1 -13  24-534.536 449.464   2
 -14   1 -24-662.255 770.107   1
 -14   1 -27-2765.85 1134.93   1
  -1 -13  27-395.409 482.406   2
  -1 -13  30-473.065 493.590   2
 -14   1 -33-2726.01 1217.32   1
  -1 -13  33-846.861 572.639   2
   0 -14 -31 811.395 727.375   1
 -14   0  31 543.629 519.878   2
  14   0 -31 804.577 658.796   3
   0 -14 -28 2646.76 1098.29   1
  14   0 -28 4957.71 1303.47   3
   0 -14 -25 16153.3 2100.12   1
 -14  14 -25 13336.4 2119.29   1
  14   0 -25 17003.2 2237.62   3
   0 -14 -22 31233.6 2689.65   1
 -14  14 -22 35495.3 3211.64   1
  14   0 -22 29137.6 2882.21   3
   0 -14 -19 42296.2 3026.38   1
 -14  14 -19 46253.3 3536.89   1
  14   0 -19 36523.3 3184.66   3
   0 -14 -16 50804.5 3130.17   1
 -14  14 -16 53822.2 3673.53   1
  14   0 -16 50435.1 3660.03   3
  14   0 -13 29327.3 2789.10   3
   0 -14 -13 28039.8 2211.17   1
  14 -14  13 26723.9 1719.12   3
 -14   0  13 25346.7 2164.92   1
 -14  14 -13 28716.1 2487.99   1
   0 -14 -10 9993.26 1245.58   1
  14   0 -10 9542.93 1584.68   3
  14 -14  10 10363.3 1049.39   3
 -14   0  10 10804.9 1428.87   1
 -14  14 -10 9123.62 1309.19   1
   0 -14  -7 6439.39 943.886   1
  14   0  -7 5998.13 1248.84   3
  14 -14   7 6272.82 806.878   3
 -14  14  -7 5402.59 919.267   1
 -14   0   7 7031.99 1196.84   1
  14 -14   4 16013.8 1301.57   3
  14   0  -4 15421.8 2012.00   3
 -14   0   4 16674.4 1874.96   1
   0 -14  -4 16189.8 1410.45   1
 -14   0   1 32666.5 2731.13   1
  14 -14   1 31738.2 1842.45   3
  14   0  -1 30862.5 2827.90   3
   0  14   1 32874.7 1901.08   3
   0 -14  -1 30580.4 1758.37   1
 -14   0  -2 78093.5 4323.16   1
   0  14  -2 75545.1 2574.65   3
  14   0   2 75063.7 4325.05   3
   0 -14   2 71216.7 2377.42   1
  14 -14  -2 68399.2 2790.38   3
   0  14  -5 113519. 2921.08   3
 -14   0  -5 120437. 5481.19   1
  14   0   5 115804. 5314.83   3
  14 -14  -5 113725. 3771.01   3
 -14   0  -8 97310.4 4922.65   1
  14 -14  -8 87336.9 3488.36   3
 -14  14   8 78669.9 2293.86   2
   0  14  -8 88615.2 2545.02   3
 -14   0 -11 31159.3 2857.17   1
 -14  14  11 28064.3 1580.56   2
  14 -14 -11 30136.7 2166.44   3
   0  14 -11 29697.8 1532.54   3
 -14   0 -14 8694.96 1520.87   1
 -14  14  14 7774.28 929.697   2
  14 -14 -14 8581.31 1234.82   3
   0  14 -14 8912.35 902.789   3
  14 -14 -17 2216.96 688.291   3
   0  14 -17 2605.31 570.627   3
  14 -14 -20 154.091 403.048   3
 -14   0 -20-643.573 778.173   1
   0 -14  23-413.105 476.606   2
 -14   0 -23-432.247 806.708   1
   0 -14  26 1156.07 590.241   2
 -14   0 -26 569.324 622.782   1
 -14   0 -29-188.418 670.974   1
   0 -14  29 707.480 514.923   2
 -14   0 -32-1233.61 1005.68   1
   0 -14  32-741.901 544.779   2
   0 -14  35-295.913 453.127   2
   1 -15  34-209.881 412.694   2
 -14  -1 -31-366.181 724.172   1
   1 -15  31-616.439 509.594   2
 -14  -1 -28-2682.10 1169.34   1
   1 -15  28-341.835 443.332   2
 -14  -1 -25 201.860 680.240   1
   1 -15  25 287.105 399.370   2
   1 -15  22 1929.20 570.716   2
 -14  -1 -22 885.917 563.885   1
 -15  14  19 4384.60 829.956   2
 -14  -1 -19 4312.11 1164.89   1
  15 -14 -19 5489.79 1145.94   3
 -15  14  16 8232.23 1049.42   2
 -14  -1 -16 8176.99 1543.14   1
  15 -14 -16 8663.18 1341.16   3
 -15  14  13 4480.65 703.492   2
 -14  -1 -13 4562.81 1108.93   1
  15 -14 -13 5535.42 994.429   3
 -14  -1 -10 2990.28 904.866   1
 -15  14  10 3460.00 570.083   2
  -1  15 -10 3326.50 466.245   3
  15 -14 -10 4567.25 862.310   3
  15 -14  -7 5327.81 909.504   3
 -14  -1  -7 4187.61 1062.52   1
 -15  14   7 4187.15 545.085   2
  -1  15  -7 4745.77 530.909   3
  15 -14  -4 579.903 255.623   3
  -1  15  -4 1383.75 311.581   3
 -14  -1  -4 850.265 538.606   1
  14   1   4 1653.55 736.165   3
 -15  14   4 547.045 136.851   2
  15 -14  -1 2244.21 542.911   3
 -14  -1  -1 2345.10 796.262   1
  -1  15  -1 2470.53 434.227   3
  14   1   1 1702.15 696.439   3
   1 -15   1 2534.63 482.684   1
   1 -15  -2 7390.19 903.036   1
  15 -14   2 8374.17 1021.45   3
  14   1  -2 7359.36 1407.22   3
  -1  15   2 8046.94 905.935   3
 -14  -1   2 7407.56 1313.15   1
  15 -14   5 6023.04 859.753   3
  14   1  -5 4358.26 1113.31   3
   1 -15  -5 5960.83 887.452   1
 -14  -1   5 6545.57 1190.25   1
 -14  -1   8 5075.98 1017.78   1
  14   1  -8 4551.35 1120.76   3
  15 -14   8 5126.57 777.152   3
   1 -15  -8 5787.90 931.079   1
 -15  14  -8 4374.80 900.361   1
  14   1 -11 9811.22 1655.96   3
   1 -15 -11 10253.5 1353.14   1
 -14  -1  11 9568.59 1348.58   1
  15 -14  11 11002.8 1167.44   3
 -15  14 -11 10073.7 1453.67   1
  14   1 -14 7985.53 1529.53   3
   1 -15 -14 8505.55 1268.17   1
  15 -14  14 8951.97 1062.39   3
 -14  -1  14 7765.56 1213.92   1
 -15  14 -14 8996.17 1503.46   1
  14   1 -17 4473.11 1059.14   3
   1 -15 -17 4558.59 978.543   1
 -14  -1  17 3803.98 831.162   1
 -15  14 -17 5799.99 1305.78   1
 -15  14 -20 11283.7 1872.57   1
   1 -15 -20 9897.59 1565.89   1
  14   1 -20 8150.94 1574.75   3
   1 -15 -23 4112.93 1093.85   1
 -15  14 -23 5752.96 1481.32   1
  14   1 -23 3412.91 1056.76   3
   1 -15 -26 485.276 566.191   1
 -15  14 -26 972.110 770.781   1
  14   1 -26 1197.74 749.828   3
  14   1 -29 695.290 580.292   3
   1 -15 -29 3.16573 439.854   1
   2 -15  32-81.2508 359.346   2
 -13  -2 -29-251.365 684.039   1
   2 -15  29 295.617 401.091   2
 -13  -2 -26-698.794 835.577   1
 -15  13  26 244.628 372.537   2
   2 -15  26 384.692 466.084   2
 -15  13  23 2357.70 697.388   2
   2 -15  23 2672.26 749.394   2
  15 -13 -23 3189.76 954.080   3
 -13  -2 -23 1451.63 884.166   1
  15 -13 -20 12352.4 1704.12   3
 -15  13  20 10929.4 1339.14   2
   2 -15  20 9877.80 1237.59   2
 -13  -2 -20 13040.3 2025.14   1
 -15  13  17 20685.0 1745.52   2
 -13  -2 -17 24970.5 2688.96   1
  15 -13 -17 21880.4 2146.65   3
  15 -13 -14 24794.5 2147.92   3
 -13  -2 -14 23175.7 2525.14   1
 -15  13  14 21689.1 1631.03   2
  15 -13 -11 9914.13 1348.95   3
 -13  -2 -11 10017.5 1616.57   1
 -15  13  11 9374.47 987.582   2
  15 -13  -8 2037.84 596.220   3
 -13  -2  -8 1843.07 650.833   1
  -2  15  -8 2466.60 324.477   3
  -2  15  -5 571.810 157.208   3
 -13  -2  -5 393.913 403.412   1
  13   2   5 980.997 547.828   3
  15 -13  -5 461.383 242.800   3
  15 -13  -2 440.075 263.054   3
  -2  15  -2 549.017 177.100   3
 -13  -2  -2 1013.69 487.076   1
  13   2   2 398.146 409.743   3
  15 -13   1 23970.6 1800.55   3
 -13  -2   1 22941.7 2255.74   1
  13   2  -1 24204.2 2526.11   3
   2 -15  -1 23007.8 1498.95   1
  -2  15   1 24128.3 1348.07   3
   2 -15  -4 15091.7 1342.28   1
  15 -13   4 15460.8 1421.19   3
  13   2  -4 14137.6 1899.91   3
 -13  -2   4 15502.1 1830.50   1
  13   2  -7 20139.5 2305.54   3
  15 -13   7 21083.1 1644.47   3
 -15  13  -7 19588.4 1881.87   1
   2 -15  -7 22030.6 1742.25   1
 -13  -2   7 22960.1 2114.78   1
  13   2 -10 29115.2 2760.15   3
  15 -13  10 30943.5 1992.78   3
   2 -15 -10 30640.0 2177.54   1
 -15  13 -10 28946.9 2404.98   1
 -13  -2  10 28723.2 2315.02   1
 -15  13 -13 6692.64 1284.05   1
   2 -15 -13 6853.17 1104.19   1
  15 -13  13 6430.06 940.722   3
  13   2 -13 5977.68 1304.69   3
 -13  -2  13 6670.87 1120.49   1
  13   2 -16 5541.89 1222.84   3
 -15  13 -16 8821.52 1582.17   1
   2 -15 -16 6234.72 1122.30   1
 -13  -2  16 6575.56 1094.16   1
 -15  13 -19 7044.05 1475.16   1
   2 -15 -19 4477.27 995.002   1
 -13  -2  19 5417.47 966.039   1
  13   2 -19 5451.02 1225.82   3
 -15  13 -22 2012.98 903.422   1
   2 -15 -22 614.496 452.971   1
  13   2 -22 1295.64 696.629   3
  13   2 -25 523.836 563.840   3
 -15  13 -25-133.796 522.541   1
   2 -15 -25-621.852 681.616   1
   2 -15 -28-996.971 707.726   1
  13   2 -28 1175.97 735.582   3
 -15  13 -28-1148.42 773.554   1
   2 -15 -31-1234.99 751.570   1
  13   2 -31-465.291 518.747   3
   3 -15  33 583.800 563.422   2
 -12  -3 -30 822.483 848.908   1
 -15  12  30 611.445 511.398   2
   3 -15  30 1547.85 682.435   2
 -12  -3 -27 1794.59 978.085   1
 -15  12  27 453.828 474.173   2
   3 -15  27 971.458 602.971   2
  15 -12 -27 913.473 763.749   3
   3 -15  24 4082.51 907.535   2
 -15  12  24 3674.52 883.800   2
  15 -12 -24 3224.74 998.072   3
 -12  -3 -24 3869.18 1246.36   1
  15 -12 -21 8651.89 1480.18   3
 -15  12  21 7834.86 1252.03   2
   3 -15  21 7228.87 1095.28   2
  15 -12 -18 19039.0 2031.04   3
 -15  12  18 18193.9 1680.00   2
   3 -15  18 19151.3 1622.50   2
 -12  -3 -18 22297.4 2561.36   1
  15 -12 -15 27136.8 2300.64   3
 -12  -3 -15 29661.0 2818.29   1
 -15  12  15 24548.8 1827.76   2
 -12  -3 -12 42292.5 3291.37   1
 -15  12  12 38443.7 2086.42   2
  15 -12 -12 41567.7 2723.69   3
 -12  -3  -9 54255.8 3574.55   1
  15 -12  -9 54829.4 2991.32   3
  15 -12  -6 28692.6 2110.86   3
 -12  -3  -6 29545.9 2567.21   1
  12   3   6 33850.0 2877.26   3
  15 -12  -3 24577.6 1906.55   3
 -12  -3  -3 24422.9 2295.97   1
  12   3   3 24277.4 2465.74   3
  -3  15  -3 23880.7 733.670   3
  15 -12   0 29155.3 2047.36   3
 -12  -3   0 27664.2 2416.56   1
  -3  15   0 28559.8 1134.82   3
  12   3   0 27089.7 2596.30   3
 -12  -3   3 27272.6 2336.16   1
  12   3  -3 24293.2 2436.29   3
  15 -12   3 26622.8 1929.38   3
 -12  -3   6 15551.0 1724.07   1
  12   3  -6 13197.3 1811.98   3
  15 -12   6 14628.5 1431.95   3
   3 -15  -6 13824.8 1339.81   1
 -15  12  -6 11862.4 1441.34   1
   3 -15  -9 14815.5 1482.53   1
  12   3  -9 13842.0 1861.52   3
  15 -12   9 15775.2 1468.58   3
 -12  -3   9 14543.5 1620.96   1
 -15  12  -9 13344.2 1622.41   1
  12   3 -12 20521.8 2254.76   3
 -15  12 -12 21234.6 2220.34   1
  15 -12  12 19508.8 1647.74   3
 -12  -3  12 19087.8 1817.15   1
   3 -15 -12 18600.1 1765.10   1
  12   3 -15 14213.9 1858.57   3
 -15  12 -15 15945.4 2069.14   1
   3 -15 -15 14468.3 1627.03   1
 -12  -3  15 13721.0 1539.09   1
 -15  12 -18 18710.5 2319.62   1
   3 -15 -18 16540.5 1827.21   1
 -12  -3  18 13639.1 1500.91   1
  12   3 -18 14428.1 1908.29   3
 -15  12 -21 9167.19 1717.20   1
   3 -15 -21 7407.37 1291.52   1
  12   3 -21 6435.85 1374.87   3
  12   3 -24 3540.77 1041.84   3
   3 -15 -24 3366.52 974.234   1
 -15  12 -24 4347.00 1265.02   1
   3 -15 -27-247.975 593.229   1
 -15  12 -27 245.374 579.208   1
  12   3 -27 640.289 591.081   3
  12   3 -30-319.485 570.482   3
   3 -15 -30-1047.55 720.755   1
 -15  12 -30-713.374 700.530   1
  12   3 -33 71.5860 395.627   3
 -15  11  31 295.198 476.106   2
 -11  -4 -31 1909.28 1067.92   1
 -11  -4 -28 1163.74 789.323   1
   4 -15  28 1817.29 719.859   2
 -15  11  28 1301.60 673.212   2
  15 -11 -28 1575.91 833.285   3
  15 -11 -25 2591.12 891.148   3
 -11  -4 -25 1636.99 915.509   1
   4 -15  25 2285.07 692.841   2
 -15  11  25 1559.72 647.252   2
 -11  -4 -22 9591.83 1776.75   1
   4 -15  22 8151.13 1138.76   2
 -15  11  22 7137.02 1200.73   2
  15 -11 -22 7542.28 1372.82   3
  15 -11 -19 11669.8 1621.15   3
   4 -15  19 11254.7 1236.42   2
 -15  11  19 9914.02 1283.10   2
 -11  -4 -19 13403.2 1996.97   1
   4 -15  16 21230.5 1565.92   2
 -15  11  16 18219.5 1608.38   2
 -11  -4 -16 22358.4 2423.29   1
  15 -11 -16 21491.8 2079.17   3
 -11  -4 -13 24395.8 2418.69   1
  15 -11 -13 20668.1 1979.54   3
 -11  -4 -10 40096.6 3006.84   1
  15 -11 -10 35353.5 2494.49   3
  -4  15 -10 36105.0 1319.35   1
  15 -11  -7 61913.9 3233.64   3
 -11  -4  -7 64419.5 3707.93   1
  15 -11  -4 50475.2 2833.17   3
 -11  -4  -4 47977.4 3156.53   1
  11   4   4 52473.9 3514.95   3
  15 -11  -1 49288.8 2757.36   3
 -11  -4  -1 48808.0 3054.08   1
  11   4   1 49984.3 3470.89   3
 -11  -4   2 35219.1 2539.28   1
  15 -11   2 36633.5 2312.35   3
  11   4  -2 32576.6 2793.56   3
  -4  15   2 32827.7 1318.20   3
  -4  15   2 34002.2 1171.63   3
 -11  -4   5 16890.4 1739.97   1
  11   4  -5 16467.8 1970.99   3
  15 -11   5 19072.4 1677.95   3
 -15  11  -5 15875.0 1635.56   1
  -4  15   5 17185.2 1039.11   3
  11   4  -8 5964.39 1193.65   3
  15 -11   8 7028.70 1019.35   3
   4 -15  -8 5166.43 844.322   1
 -15  11  -8 5386.14 1061.23   1
 -11  -4   8 5881.99 1025.30   1
 -15  11 -11 2901.92 722.073   1
  11   4 -11 3927.67 954.883   3
   4 -15 -11 3393.44 738.210   1
  15 -11  11 3638.66 752.174   3
 -11  -4  11 3893.47 813.625   1
  11   4 -14 9857.32 1561.17   3
 -15  11 -14 9254.72 1560.31   1
   4 -15 -14 8427.73 1242.92   1
 -11  -4  14 8626.77 1164.19   1
 -15  11 -17 10677.6 1726.99   1
 -11  -4  17 10074.7 1248.38   1
   4 -15 -17 10813.1 1450.97   1
  11   4 -17 9770.77 1534.87   3
 -15  11 -20 12636.2 1960.31   1
  11   4 -20 9535.91 1551.76   3
   4 -15 -20 11026.4 1552.49   1
 -15  11 -23 7847.66 1692.73   1
   4 -15 -23 7019.39 1338.85   1
  11   4 -23 6186.97 1311.78   3
 -15  11 -26 1347.17 790.856   1
   4 -15 -26 1510.55 793.555   1
  11   4 -26 1539.55 713.630   3
 -15  11 -29-466.956 624.456   1
  11   4 -29-327.123 448.917   3
   4 -15 -29-145.814 581.131   1
   4 -15 -32-54.4856 461.303   1
 -11  -4  32-345.482 483.545   2
  11   4 -32-160.918 461.978   3
 -15  11 -32-1111.86 844.194   1
 -15  10  35-48.0989 376.797   2
 -10  -5 -32-27.6589 559.719   1
 -15  10  32 35.4434 344.233   2
 -10  -5 -29-1018.77 790.856   1
 -15  10  29-555.161 521.255   2
  15 -10 -29 248.675 416.044   3
 -10  -5 -26-872.124 915.523   1
   5 -15  26-132.404 387.221   2
 -15  10  26-214.141 484.630   2
  15 -10 -26-193.181 471.378   3
 -10  -5 -23-1078.13 899.808   1
   5 -15  23-305.586 425.073   2
 -15  10  23-607.569 602.332   2
  15 -10 -23-570.733 630.278   3
 -10  -5 -20 808.169 660.112   1
  15 -10 -20-42.9611 442.802   3
   5 -15  20 948.447 391.242   2
 -15  10  20 431.387 395.755   2
   5 -15  17 6954.44 887.762   2
 -10  -5 -17 8943.87 1519.54   1
  15 -10 -17 5743.31 1081.77   3
   5 -15  14 13471.8 1133.62   2
  15 -10 -14 12002.0 1532.58   3
 -10  -5 -14 13721.7 1767.68   1
  15 -10 -11 10688.5 1421.71   3
 -10  -5 -11 12167.2 1612.10   1
   5 -15  11 11195.9 942.166   2
  -5  15 -11 10808.3 809.329   1
  15 -10  -8 11877.1 1451.70   3
 -10  -5  -8 11326.5 1494.12   1
  15 -10  -5 5763.74 993.060   3
 -10  -5  -5 6229.57 1075.61   1
  10   5   5 5516.65 1131.53   3
  15 -10  -2 437.155 343.849   3
  10   5   2 478.558 411.428   3
 -10  -5  -2-218.465 521.164   1
  15 -10   1 203.165 285.184   3
  10   5  -1 156.184 346.571   3
 -10  -5   1 368.251 348.366   1
  10   5  -4 64.3610 558.658   3
 -10  -5   4 397.457 360.416   1
  15 -10   4 165.148 264.855   3
 -15  10  -4 441.529 408.578   1
  -5  15   4 162.207 108.379   3
  10   5  -7 189.533 314.584   3
 -10  -5   7 333.281 240.876   1
 -15  10  -7 582.612 388.676   1
  15 -10   7 452.392 269.139   3
  10   5 -10 10490.5 1494.06   3
  15 -10  10 10754.4 1293.19   3
 -10  -5  10 11093.7 1305.37   1
 -15  10 -10 10903.4 1549.40   1
 -15  10 -13 13415.9 1796.58   1
  10   5 -13 11808.5 1600.36   3
   5 -15 -13 12364.5 1461.87   1
 -10  -5  13 13067.3 1373.99   1
  10   5 -16 5725.61 1059.65   3
 -15  10 -16 9703.83 1613.01   1
   5 -15 -16 8052.52 1241.94   1
 -10  -5  16 7080.96 977.959   1
 -15  10 -19 8187.87 1542.41   1
   5 -15 -19 8522.68 1349.82   1
  10   5 -19 6778.27 1250.81   3
  10   5 -22 1383.59 688.017   3
   5 -15 -22 899.913 729.130   1
 -15  10 -22 814.956 748.544   1
  10   5 -25 347.171 467.117   3
   5 -15 -25 297.245 520.585   1
 -15  10 -25-1008.67 840.822   1
   5 -15 -28-65.3441 532.320   1
 -15  10 -28-607.223 797.558   1
  10   5 -28-34.6452 368.288   3
 -15  10 -31-747.171 732.816   1
 -10  -5  31 26.8585 348.982   2
  10   5 -31 325.657 446.606   3
   5 -15 -31 5.79941 408.193   1
 -15  10 -34-2262.02 1124.95   1
  10   5 -34-533.218 558.791   3
 -15   9  33-17.0613 330.694   2
  -9  -6 -33-75.3225 596.021   1
  -9  -6 -30-619.585 635.970   1
 -15   9  30 68.8237 347.062   2
  15  -9 -30 860.443 665.904   3
  -9  -6 -27 1951.29 868.479   1
 -15   9  27 2491.44 796.047   2
  15  -9 -27 3241.73 1031.19   3
  15  -9 -24 1581.89 665.149   3
  -9  -6 -24 1368.34 665.663   1
 -15   9  24 1348.11 507.863   2
  15  -9 -21-532.884 558.331   3
   6 -15  21 225.969 234.731   2
  15  -9 -18-18.0808 490.752   3
   6 -15  18 265.596 215.619   2
  -9  -6 -15 692.998 439.028   1
   6 -15  15 1391.31 375.041   2
  15  -9 -12 2961.58 763.503   3
   6 -15  12 3071.19 493.007   2
  -9  -6 -12 3632.90 878.408   1
  -6  15 -12 4206.35 589.657   1
  -9  -6  -9 2370.76 699.167   1
  15  -9  -9 3256.57 820.141   3
   6 -15   9 2176.72 379.486   2
  15  -9  -6 2761.43 589.172   3
  -9  -6  -6 4187.51 895.006   1
  15  -9  -3 18019.0 1759.33   3
   9   6   3 18633.3 2036.52   3
  -9  -6  -3 19730.5 1809.03   1
  15  -9   0 35525.5 2425.10   3
   9   6   0 32657.7 2675.64   3
  -9  -6   0 32184.3 2226.33   1
   9   6  -3 43952.5 3056.50   3
  15  -9   3 49592.7 2840.76   3
  -9  -6   3 44697.6 2511.78   1
 -15   9  -3 41463.3 2592.57   1
  -6  15   3 41726.2 1157.19   3
   9   6  -6 17216.3 1900.71   3
  -9  -6   6 17981.7 1556.23   1
  15  -9   6 18832.1 1751.54   3
  -6  15   6 17550.0 1006.67   3
 -15   9  -6 17140.4 1826.89   1
   9   6  -9 297.453 447.084   3
  -9  -6   9 802.925 311.819   1
  15  -9   9 111.083 504.853   3
 -15   9 -12 17509.3 2096.29   1
   9   6 -12 13714.2 1610.65   3
  -9  -6  12 16574.5 1421.63   1
   9   6 -15 17395.4 1870.33   3
  -9  -6  15 17479.6 1444.13   1
   9   6 -18 3513.98 846.739   3
 -15   9 -18 6544.87 1429.71   1
   6 -15 -18 6571.37 1126.83   1
 -15   9 -21-2008.97 941.748   1
   6 -15 -21-162.041 504.290   1
   9   6 -21-832.218 696.970   3
   9   6 -24 1916.22 700.322   3
 -15   9 -24 2513.42 995.502   1
   6 -15 -24 2396.46 870.052   1
 -15   9 -27 2539.03 1009.85   1
   9   6 -27 2237.27 776.464   3
   6 -15 -27 3006.73 983.978   1
 -15   9 -30 206.984 599.042   1
   9   6 -30 658.219 553.489   3
   6 -15 -30 1339.92 816.972   1
   9   6 -33-176.756 526.279   3
  -9  -6  33-137.946 524.495   2
 -15   9 -36-688.990 781.140   1
 -15   8  34 777.183 600.476   2
  15  -8 -31 826.813 616.290   3
 -15   8  31 146.201 390.111   2
  -8  -7 -31 114.208 535.806   1
  -8  -7 -28-190.361 670.045   1
 -15   8  28 548.161 470.629   2
  15  -8 -28 1068.18 712.521   3
  -8  -7 -25 235.423 519.416   1
 -15   8  25 180.724 315.252   2
  15  -8 -25 605.367 525.570   3
  -8  -7 -22-248.693 699.262   1
 -15   8  22-419.346 528.949   2
  15  -8 -22-46.3042 449.052   3
  -8  -7 -19 1998.73 488.045   1
  15  -8 -19 3125.31 908.321   3
  15  -8 -16 4580.93 995.944   3
   7 -15  16 4987.75 667.641   2
  15  -8 -13 1964.79 678.688   3
  -8  -7 -13 1584.07 608.130   1
  -7  15 -13 1552.94 399.730   1
   7 -15  13 1792.45 365.295   2
  15  -8 -10-144.236 355.564   3
   7 -15  10 41.1299 109.703   2
  -7  15 -10 135.355 191.550   1
  -8  -7 -10 298.416 331.919   1
  15  -8  -7 7154.72 1183.91   3
   7 -15   7 6117.27 468.397   2
  -8  -7  -7 7377.41 1112.14   1
  15  -8  -4 8985.06 1304.83   3
   8   7   4 8704.89 1351.30   3
   7 -15   4 8216.56 418.146   2
  -8  -7  -4 10802.3 1289.22   1
  15  -8  -1 6064.52 1057.95   3
   8   7   1 5214.96 1065.88   3
  -8  -7  -1 6300.75 945.762   1
  15  -8   2 12072.1 1458.19   3
   8   7  -2 11841.9 1568.23   3
  -8  -7   2 10646.5 1186.77   1
   7 -15  -2 9028.20 465.869   2
 -15   8  -2 10193.8 1363.67   1
  -7  15   5 2609.64 356.941   3
   8   7  -5 2268.65 712.939   3
  15  -8   5 2966.08 735.987   3
   7 -15  -5 2034.14 288.660   2
  -8  -7   5 2362.96 514.838   1
 -15   8  -5 2892.64 755.129   1
 -15   8  -8 1243.92 550.558   1
   8   7  -8 848.602 428.313   3
  -8  -7   8 1646.89 416.239   1
  15  -8   8 894.575 411.992   3
   7 -15  -8 837.826 220.805   2
   8   7 -11 482.304 387.173   3
 -15   8 -11 755.542 558.324   1
  -8  -7  11 988.117 317.795   1
   8   7 -14-109.851 545.243   3
 -15   8 -14 620.159 440.444   1
  -8  -7  14 718.774 256.700   1
   8   7 -17 2451.80 652.130   3
 -15   8 -17 4404.57 1116.58   1
 -15   8 -20-569.510 876.081   1
   8   7 -23-1442.41 633.789   3
 -15   8 -23-736.158 802.110   1
   8   7 -26-454.711 526.468   3
 -15   8 -26-755.019 828.586   1
   8   7 -29 102.752 319.217   3
 -15   8 -29-1732.01 942.364   1
  -8  -7  32-826.556 617.386   2
   8   7 -32 79.7555 394.872   3
 -15   8 -35-2390.25 1166.84   1
 -15   7  32 1430.73 714.625   2
  15  -7 -32 1834.84 882.626   3
  -7  -8 -32 1394.82 879.755   1
  15  -7 -29 1310.48 767.110   3
 -15   7  29 679.613 628.413   2
  -7  -8 -29 1262.68 756.496   1
 -15   7  26 1846.10 776.656   2
  15  -7 -26 1898.09 894.856   3
  -7  -8 -23 13827.3 1918.85   1
 -15   7  23 7651.46 1286.51   2
  15  -7 -23 12425.8 1803.47   3
  15  -7 -20 21950.2 2278.47   3
  -7  -8 -20 23223.2 2458.00   1
  -7  -8 -17 17338.7 1952.11   1
  15  -7 -17 14871.4 1835.71   3
  -8  15 -14 16684.6 1458.52   1
  -7  -8 -14 17473.1 1853.75   1
  15  -7 -14 16784.9 1908.22   3
  15  -7 -11 2465.84 746.150   3
  -7  -8 -11 1425.59 446.370   1
  -8  15 -11 2190.85 493.510   1
  -7  -8  -8-193.238 423.728   1
  15  -7  -8-6.11912 320.626   3
  15  -7  -5 394.812 380.330   3
  -7  -8  -5 142.322 291.164   1
  15  -7  -2 6415.67 1109.68   3
   7   8   2 6607.22 1146.46   3
  -7  -8  -2 6654.38 912.989   1
  15  -7   1 23886.0 2079.33   3
   7   8  -1 21383.2 2046.03   3
  -7  -8   1 21181.0 1549.85   1
 -15   7  -1 20674.3 1873.39   1
  -8  15   4 33756.9 1166.55   3
 -15   7  -4 34330.0 2530.40   1
   7   8  -4 34403.2 2495.00   3
  15  -7   4 38412.7 2676.14   3
  -7  -8   4 34280.5 1890.55   1
  -8  15   7 44534.1 1687.71   3
   7   8  -7 45867.9 2825.28   3
  15  -7   7 48564.3 2959.16   3
  -7  -8   7 45953.2 2082.18   1
 -15   7  -7 49450.8 3217.95   1
 -15   7 -10 19051.0 2169.35   1
   7   8 -10 17010.7 1722.44   3
  -7  -8  10 16152.0 1161.19   1
  15  -7  10 19196.9 1869.77   3
 -15   7 -13 816.580 502.638   1
  -7  -8  13 2049.88 374.193   1
   7   8 -13 1561.13 472.150   3
   7   8 -16 1179.50 503.429   3
 -15   7 -16 918.369 612.236   1
 -15   7 -19 1525.52 775.595   1
   7   8 -19 1017.50 461.307   3
   7   8 -22 396.389 360.738   3
 -15   7 -22 705.792 529.894   1
   7   8 -25 876.163 517.031   3
 -15   7 -25 746.459 578.135   1
 -15   7 -28 123.387 579.515   1
   7   8 -28 1168.86 592.082   3
   7   8 -31 91.8880 362.471   3
  -7  -8  31 55.5973 387.160   2
  -6  -9 -33 1167.32 798.709   1
 -15   6  33 964.427 708.050   2
  15  -6 -30 1943.64 927.420   3
 -15   6  30 1525.65 760.358   2
  -6  -9 -30 2949.52 1186.43   1
  -6  -9 -27 7157.96 1527.77   1
 -15   6  27 4917.89 1162.48   2
  15  -6 -27 5684.85 1367.63   3
  -6  -9 -24 13594.5 1956.99   1
  15  -6 -24 12432.8 1877.94   3
  -6  -9 -21 15584.2 2002.16   1
  15  -6 -21 18576.7 2202.94   3
  15  -6 -18 32344.1 2790.08   3
  -6  -9 -18 35119.1 2821.04   1
  -9  15 -15 29619.3 2122.25   1
  -6  -9 -15 30277.5 2471.60   1
  15  -6 -15 29613.8 2599.80   3
  -6  -9 -12 34895.9 2529.65   1
  15  -6 -12 36147.1 2791.38   3
  -9  15 -12 35439.6 2157.52   1
  -6  -9  -9 28664.3 2185.72   1
  15  -6  -9 27775.4 2429.06   3
  -6  -9  -6 38271.4 2344.22   1
  15  -6  -6 35556.2 2728.38   3
  15  -6  -3 36007.0 2699.98   3
   6   9   3 32072.6 2486.65   3
  -6  -9  -3 33715.2 2076.61   1
  15  -6   0 22616.0 2096.15   3
   6   9   0 21290.0 1976.63   3
  -6  -9   0 20560.4 1522.85   1
 -15   6   0 20274.6 1903.74   1
   6   9  -3 34002.5 2394.45   3
  -9  15   3 34414.2 1164.06   3
  15  -6   3 36338.7 2688.71   3
  -6  -9   3 35186.2 1856.86   1
 -15   6  -3 33135.4 2560.97   1
  -9  15   6 14633.7 921.926   3
   6   9  -6 14683.6 1552.40   3
  15  -6   6 14615.8 1710.29   3
  -6  -9   6 13611.8 1059.53   1
 -15   6  -6 14132.9 1764.26   1
 -15   6  -9 12641.9 1787.97   1
   6   9  -9 11163.3 1335.84   3
  15  -6   9 12064.3 1535.28   3
  -6  -9   9 9852.11 795.796   1
   6   9 -12 15216.8 1539.77   3
  -6  -9  12 13250.3 787.046   1
 -15   6 -15 8853.53 1601.47   1
   6   9 -15 5665.91 967.557   3
 -15   6 -18 7649.83 1591.26   1
   6   9 -18 6702.69 1118.63   3
 -15   6 -21 10255.3 1869.08   1
   6   9 -21 6826.35 1160.95   3
 -15   6 -24 3934.35 1270.70   1
   6   9 -24 3204.87 846.703   3
 -15   6 -27 1827.32 1013.94   1
   6   9 -27 2093.89 762.841   3
  -6  -9  30-301.203 508.919   2
   6   9 -30 210.755 362.800   3
 -15   6 -30-999.722 817.595   1
  -6  -9  33-530.920 525.732   2
 -15   6 -36-1266.78 932.582   1
  -5 -10 -31 1555.06 914.640   1
 -15   5  31-187.175 445.231   2
  15  -5 -31 545.168 687.793   3
  15  -5 -28 2039.17 848.106   3
  -5 -10 -28 1651.58 852.763   1
 -15   5  28 386.365 461.352   2
  -5 -10 -25 1950.88 903.679   1
  15  -5 -25 4227.03 1168.68   3
  15  -5 -22-517.444 651.674   3
  -5 -10 -22-449.231 718.063   1
  15  -5 -19-1450.20 948.770   3
  -5 -10 -19 118.155 492.631   1
 -10  15 -16 2360.15 637.426   1
  15  -5 -16 1908.91 628.362   3
  -5 -10 -16 2031.07 689.220   1
 -10  15 -13 2331.12 602.552   1
  15  -5 -13 943.259 440.491   3
  10 -15  13 1732.85 282.288   3
  -5 -10 -13 1373.56 516.619   1
  15  -5 -10 20739.2 2145.92   3
  -5 -10 -10 20658.9 1814.45   1
 -10  15 -10 19639.6 1623.87   1
  -5 -10  -7 41556.8 2431.97   1
  15  -5  -7 42410.7 3039.26   3
  15  -5  -4 35554.4 2753.99   3
  -5 -10  -4 35177.1 2111.86   1
 -15   5   4 30407.9 2251.91   1
  15  -5  -1 16704.1 1877.82   3
   5  10   1 14113.2 1581.35   3
 -15   5   1 13760.0 1569.07   1
  -5 -10  -1 13175.0 1202.66   1
  -5 -10   2-128.727 287.938   1
 -15   5  -2 96.4521 325.603   1
   5  10  -2 55.8936 318.319   3
  15  -5   2 308.308 457.931   3
 -10  15   2 136.564 85.7873   3
 -15   5  -5 1856.12 729.910   1
  -5 -10   5 951.097 244.869   1
   5  10  -5 1391.30 461.197   3
 -10  15   5 906.907 209.369   3
  15  -5   5 2339.34 766.354   3
   5  10  -8 3233.80 704.514   3
 -15   5  -8 2971.53 858.159   1
  15  -5   8 3477.40 873.325   3
  -5 -10   8 3058.12 418.228   1
   5  10 -11 332.412 288.587   3
 -15   5 -11 395.009 476.662   1
  -5 -10  11 243.789 95.1997   1
 -15   5 -14 12056.8 1849.33   1
   5  10 -14 9751.00 1207.50   3
 -15   5 -17 22045.5 2540.43   1
   5  10 -17 17765.4 1664.17   3
 -15   5 -20 13754.3 2126.43   1
   5  10 -20 10861.0 1383.68   3
   5  10 -23 3432.92 816.674   3
 -15   5 -23 3523.21 1089.73   1
   5  10 -26-153.280 354.681   3
 -15   5 -26 72.3199 544.884   1
  -5 -10  29-991.459 594.746   2
   5  10 -29-27.7323 350.223   3
  -5 -10  32 43.2490 392.178   2
 -15   5 -32-2606.92 1181.45   1
 -15   5 -35 51.1820 664.013   1
  -4 -11 -32 2635.27 1080.77   1
 -15   4  32 152.624 382.737   2
  15  -4 -32 2597.77 1030.19   3
  15  -4 -29 290.538 496.905   3
  -4 -11 -29 603.017 610.035   1
 -15   4  29-526.112 561.585   2
  -4 -11 -26 243.951 496.178   1
  15  -4 -26 1398.59 755.036   3
  -4 -11 -23 2253.50 812.502   1
  15  -4 -23 2861.19 925.447   3
  15  -4 -20-325.566 603.608   3
 -11  15 -20 769.902 380.785   1
  -4 -11 -20 301.006 506.322   1
  15  -4 -17-73.2973 731.847   3
 -11  15 -17 338.676 481.742   1
  -4 -11 -17 825.177 535.687   1
  15  -4 -14-231.675 612.059   3
 -11  15 -14 867.724 360.219   1
  -4 -11 -14 1383.50 595.116   1
  11 -15  11 885.431 217.433   3
  -4 -11 -11 892.373 494.058   1
 -11  15 -11 278.148 309.784   1
  11 -15   8 2528.71 274.149   3
  15  -4  -8 3187.29 958.393   3
  -4 -11  -8 3087.28 718.245   1
  15  -4  -5 32568.6 2748.99   3
  -4 -11  -5 33606.5 2073.88   1
 -15   4   5 29677.7 2259.23   1
  11 -15   2 64677.2 1411.24   3
  -4 -11  -2 68048.5 2752.32   1
  15  -4  -2 71688.1 4003.73   3
   4  11   2 66228.2 3353.95   3
 -15   4   2 69599.6 3563.28   1
  -4 -11   1 83064.4 2793.44   1
  15  -4   1 82360.0 4255.51   3
   4  11  -1 77377.5 3482.83   3
  11 -15  -1 78973.4 2004.12   3
 -15   4  -1 83804.0 4050.34   1
   4  11  -4 75193.6 3307.70   3
  -4 -11   4 73491.3 2358.67   1
 -11  15   4 74638.4 2202.30   3
  15  -4   4 80299.7 4164.57   3
 -15   4  -4 83003.2 4235.07   1
 -15   4  -7 34806.5 2934.78   1
   4  11  -7 30518.4 2045.07   3
  -4 -11   7 28091.9 1215.42   1
  15  -4   7 28085.3 2443.00   3
   4  11 -10 9217.87 1077.58   3
  -4 -11  10 7783.54 405.045   1
   4  11 -13 2039.83 560.176   3
 -15   4 -13 3573.80 1073.96   1
 -15   4 -16-665.577 738.002   1
   4  11 -16-277.482 351.093   3
   4  11 -19-116.984 293.070   3
 -15   4 -19-586.720 790.035   1
 -15   4 -22-365.679 761.509   1
   4  11 -22-111.429 294.165   3
 -15   4 -25 6.37855 605.859   1
   4  11 -25 280.991 331.948   3
  -4 -11  28 1779.53 722.051   2
 -15   4 -28 1087.82 760.735   1
 -15   4 -31-2827.20 1260.91   1
  -4 -11  31 521.397 529.552   2
 -15   4 -34 205.432 780.977   1
  -4 -11  34 476.637 556.402   2
  -3 -12 -30 5124.97 1361.71   1
 -15   3  30 3012.46 974.941   2
  15  -3 -30 5003.74 1337.64   3
  -3 -12 -27 5283.38 1298.30   1
  15  -3 -27 6517.90 1437.95   3
  15  -3 -24 12186.5 1886.45   3
  -3 -12 -24 12354.7 1796.14   1
 -12  15 -21 6751.52 1219.08   1
  -3 -12 -21 7729.08 1373.08   1
  15  -3 -21 6598.25 1367.05   3
  15  -3 -18 40.5966 489.280   3
 -12  15 -18 665.918 449.987   1
  -3 -12 -18 277.030 480.182   1
  15  -3 -15-347.427 744.365   3
 -12  15 -15 256.174 380.470   1
  -3 -12 -15 524.702 566.943   1
  15  -3 -12 3187.71 902.382   3
 -12  15 -12 4361.99 892.374   1
  12 -15  12 3937.84 522.698   3
  -3 -12 -12 4799.31 958.640   1
  15  -3  -9 18753.0 2194.85   3
  12 -15   9 17034.0 984.776   3
  -3 -12  -9 21936.2 1851.20   1
 -12  15  -9 18926.7 1701.19   1
  12 -15   6 74783.0 1929.19   3
  15  -3  -6 85587.1 4567.78   3
  -3 -12  -6 82524.2 3298.75   1
 -15   3   6 78658.6 3744.46   1
   3  12   3 143317. 4800.26   3
  -3 -12  -3 147785. 4136.84   1
 -15   3   3 146036. 5258.62   1
  12 -15   3 142212. 2696.56   3
   3  12   0 155264. 4825.70   3
  12 -15   0 153846. 3095.84   3
  -3 -12   0 157211. 3915.66   1
 -15   3   0 163620. 5778.57   1
   3  12  -3 143932. 4383.78   3
  15  -3   3 149417. 5856.40   3
  12 -15  -3 136705. 3324.31   3
 -12  15   3 143661. 3259.38   3
  -3 -12   3 137486. 3281.87   1
  -3 -12   6 46983.8 1616.88   1
  15  -3   6 51480.6 3375.70   3
   3  12  -6 52880.5 2560.20   3
  12 -15  -6 52515.0 2284.22   3
   3  12  -9 8052.31 959.424   3
  12 -15  -9 10525.5 1133.42   3
 -15   3  -9 10963.2 1725.25   1
  15  -3   9 9781.76 1432.43   3
 -15   3 -12 4680.22 1217.78   1
   3  12 -12 3448.16 662.182   3
 -15   3 -15 1831.84 804.977   1
   3  12 -15 1127.70 396.958   3
 -15   3 -18 6424.25 1438.87   1
   3  12 -18 3191.40 657.229   3
 -15   3 -21 11783.3 1998.65   1
   3  12 -21 8241.83 1116.37   3
 -15   3 -24 11143.9 2022.10   1
   3  12 -24 9309.62 1271.18   3
  -3 -12  27 6138.99 1227.89   2
 -15   3 -27 6547.25 1694.32   1
 -15   3 -30 680.233 665.179   1
  -3 -12  30 1555.10 736.711   2
 -15   3 -33-583.436 752.910   1
  -3 -12  33 403.234 530.758   2
 -15   2  31 256.536 469.240   2
  -2 -13 -31 234.377 638.609   1
  15  -2 -31 834.322 637.081   3
  15  -2 -28 5354.36 1369.22   3
  -2 -13 -28 3461.73 1095.85   1
  -2 -13 -25 1775.77 810.889   1
  15  -2 -25 2402.45 924.758   3
  -2 -13 -22 146.447 527.238   1
 -13  15 -22 903.855 603.039   1
  15  -2 -22 1877.19 857.784   3
  15  -2 -19-418.497 563.314   3
  -2 -13 -19-911.463 659.650   1
 -13  15 -19-1018.55 763.909   1
  15  -2 -16 631.968 549.633   3
 -13  15 -16 532.359 387.645   1
  -2 -13 -16 262.983 451.350   1
 -13  15 -13 322.820 344.411   1
  15  -2 -13 1314.26 826.595   3
  -2 -13 -13 575.446 431.968   1
  13 -15  13 696.659 288.119   3
  -2 -13 -10 1095.52 527.908   1
  15  -2 -10 1280.53 690.139   3
  13 -15  10 1057.42 304.175   3
 -15   2  10 1356.53 575.501   1
 -13  15 -10 915.888 503.657   1
  13 -15   7 9442.87 833.258   3
  15  -2  -7 11100.3 1755.81   3
  -2 -13  -7 11086.3 1336.53   1
 -15   2   7 12183.7 1561.19   1
  15  -2  -4 22846.8 2399.00   3
  13 -15   4 22091.3 1267.00   3
  -2 -13  -4 23107.6 1712.89   1
 -15   2   4 26325.7 2316.71   1
  15  -2  -1 42278.5 3232.65   3
   2  13   1 36280.8 2270.07   3
  -2 -13  -1 36756.4 1972.50   1
 -15   2   1 39171.8 2875.80   1
  13 -15   1 35648.7 1667.73   3
 -15   2  -2 18693.7 2101.81   1
   2  13  -2 18648.6 1522.72   3
  15  -2   2 17467.3 2110.95   3
  13 -15  -2 17035.0 1248.00   3
  -2 -13   2 17422.5 1208.56   1
   2  13  -5 6205.75 840.684   3
 -15   2  -5 5365.57 1217.77   1
  -2 -13   5 5711.61 576.029   1
  15  -2   5 5300.18 1123.49   3
  13 -15  -5 6342.48 832.127   3
 -15   2  -8 1763.44 757.318   1
   2  13  -8 997.661 356.899   3
  15  -2   8 678.625 434.376   3
  13 -15  -8 462.506 271.448   3
   2  13 -11 49.0190 177.116   3
 -15   2 -11-445.822 652.991   1
  13 -15 -11 281.588 273.133   3
 -15   2 -14-308.333 648.291   1
  13 -15 -14 35.6069 255.069   3
   2  13 -14 96.4914 206.021   3
 -15   2 -17-535.874 843.148   1
 -15   2 -20 2875.95 1128.78   1
   2  13 -20 1889.56 535.304   3
 -15   2 -23 631.336 586.915   1
   2  13 -23 761.856 358.587   3
  -2 -13  26-285.024 432.514   2
 -15   2 -26-2092.32 1149.28   1
 -15   2 -29-306.649 845.222   1
  -2 -13  29 949.518 629.315   2
 -15   2 -32-2322.75 1183.97   1
  -2 -13  32-192.583 464.821   2
  -1 -14 -29 703.079 740.012   1
  15  -1 -29 1780.61 877.840   3
  15  -1 -26 2039.52 908.811   3
  -1 -14 -26 1512.61 795.434   1
  -1 -14 -23 10538.1 1668.61   1
 -14  15 -23 9555.68 1780.73   1
  15  -1 -23 8708.44 1651.06   3
  15  -1 -20 11403.8 1899.18   3
  -1 -14 -20 12948.1 1752.66   1
 -14  15 -17 23227.6 2463.34   1
  -1 -14 -17 19968.1 2097.81   1
  15  -1 -17 17751.0 2252.49   3
  15  -1 -14 20315.6 2398.68   3
  14 -15  14 18163.7 1377.67   3
  -1 -14 -14 19138.1 1922.82   1
 -14  15 -14 19755.8 2104.34   1
  15  -1 -11 5544.98 1237.14   3
  14 -15  11 6479.20 798.967   3
 -15   1  11 4701.22 988.991   1
 -14  15 -11 5105.10 999.685   1
  -1 -14 -11 5617.20 998.507   1
  15  -1  -8 638.818 502.192   3
  14 -15   8 620.716 264.359   3
  -1 -14  -8 643.027 352.546   1
 -14  15  -8-36.2168 332.007   1
 -15   1   8 1088.60 485.062   1
  14 -15   5 349.664 211.373   3
  15  -1  -5 125.629 476.753   3
  -1 -14  -5 237.565 270.465   1
 -15   1   5 73.6812 331.565   1
  14 -15   2 376.618 198.514   3
  15  -1  -2 178.105 397.920   3
  -1 -14  -2-89.6025 290.319   1
 -15   1   2 373.662 435.368   1
   1  14   2 57.2799 253.923   3
  14 -15  -1 775.703 316.126   3
 -15   1  -1 1312.34 614.716   1
   1  14  -1 1142.19 406.296   3
  15  -1   1 464.058 425.879   3
  -1 -14   1 622.334 256.869   1
 -15   1  -4 18776.4 2232.83   1
   1  14  -4 17537.4 1317.91   3
  15  -1   4 19289.3 2253.35   3
  -1 -14   4 15669.6 1019.92   1
  14 -15  -4 17662.8 1425.91   3
   1  14  -7 30393.8 1698.15   3
 -15   1  -7 32187.5 2947.85   1
  15  -1   7 34489.6 2937.11   3
  14 -15  -7 30546.9 1979.86   3
 -15   1 -10 8676.31 1505.67   1
  14 -15 -10 10464.8 1245.72   3
   1  14 -10 9773.75 941.618   3
   1  14 -13 4627.80 694.184   3
 -15   1 -13 4289.08 992.522   1
  14 -15 -13 3880.15 822.647   3
   1  14 -16 1000.40 361.579   3
 -15   1 -16 862.358 565.459   1
  14 -15 -16 1044.17 481.727   3
 -15   1 -19 238.469 507.065   1
 -15   1 -22-313.005 780.131   1
  -1 -14  25 251.802 363.514   2
 -15   1 -25-462.069 753.153   1
 -15   1 -28-1470.03 964.945   1
  -1 -14  28-49.6804 446.384   2
 -15   1 -31-2653.83 1219.27   1
  -1 -14  31-643.929 516.329   2
  -1 -14  34-889.414 586.556   2
   0 -15 -30-122.442 591.444   1
  15   0 -30-329.477 498.975   3
   0 -15 -27 1641.77 834.268   1
  15   0 -27 1259.30 769.080   3
   0 -15 -24 2571.33 946.717   1
  15   0 -24 2865.45 1011.77   3
 -15  15 -24 2114.67 932.437   1
  15   0 -21 7551.18 1581.67   3
   0 -15 -21 10061.5 1626.31   1
 -15  15 -21 11739.3 1941.13   1
 -15  15 -18 16583.9 2156.92   1
   0 -15 -18 13061.3 1791.83   1
  15   0 -18 13306.8 2036.59   3
 -15  15 -15 20454.4 2302.34   1
  15   0 -15 17897.0 2326.07   3
   0 -15 -15 19736.5 1987.36   1
  15 -15  15 18385.5 1486.69   3
 -15   0  15 16838.5 1831.29   1
  15   0 -12 20362.3 2452.55   3
   0 -15 -12 22186.8 2017.91   1
  15 -15  12 22292.7 1600.67   3
 -15   0  12 19959.7 2011.44   1
 -15  15 -12 20844.4 2138.27   1
  15   0  -9 9868.64 1697.60   3
   0 -15  -9 9936.17 1256.75   1
  15 -15   9 10251.4 1047.12   3
 -15  15  -9 8675.87 1306.17   1
 -15   0   9 10105.3 1461.21   1
 -15   0   6 3516.45 935.230   1
  15 -15   6 3451.14 635.356   3
  15   0  -6 3114.93 960.894   3
   0 -15  -6 3932.76 737.813   1
  15 -15   3 4533.92 725.733   3
 -15   0   3 4716.30 1056.54   1
  15   0  -3 4223.21 1132.66   3
   0  15   3 4525.54 777.256   3
   0 -15  -3 4429.32 746.025   1
  15 -15   0 1873.13 485.613   3
 -15   0   0 1351.85 578.575   1
   0  15   0 1953.74 468.293   3
  15   0   0 1008.15 579.705   3
   0 -15   0 1530.86 399.052   1
  15 -15  -3 731.575 311.181   3
   0  15  -3 447.228 206.482   3
 -15   0  -3 650.318 454.172   1
  15   0   3 661.699 563.490   3
 -15   0  -6 14267.2 1998.33   1
  15   0   6 15804.5 2071.22   3
  15 -15  -6 11997.6 1295.76   3
   0  15  -6 13554.2 1046.04   3
 -15   0  -9 23349.8 2571.37   1
  15 -15  -9 19055.9 1716.56   3
   0  15  -9 21713.2 1291.85   3
 -15   0 -12 11220.6 1822.39   1
  15 -15 -12 11514.9 1409.86   3
 -15   0 -15 4822.63 1221.03   1
  15 -15 -15 6922.92 1175.52   3
  15 -15 -18 1254.74 580.231   3
 -15   0 -18-1103.98 1045.84   1
 -15   0 -24-826.822 932.572   1
   0 -15  24 1180.38 573.017   2
 -15   0 -27-847.339 957.801   1
   0 -15  27 19.4657 337.541   2
 -15   0 -30-1694.15 1227.87   1
   0 -15  30-536.037 489.528   2
   0 -15  33-802.640 577.442   2
   1 -16  32 966.696 656.036   2
 -15  -1 -29-305.690 749.511   1
   1 -16  29 179.431 385.947   2
 -15  -1 -26-963.819 974.980   1
   1 -16  26 412.747 407.882   2
   1 -16  23-236.496 493.545   2
 -15  -1 -23-1352.89 978.912   1
 -15  -1 -20-1134.07 1055.28   1
  16 -15 -20-50.9982 357.900   3
 -15  -1 -17-1111.85 1052.99   1
  16 -15 -17-141.851 482.650   3
 -15  -1 -14 208.036 538.504   1
  16 -15 -14 106.471 311.886   3
 -15  -1 -11 5187.40 1417.95   1
  16 -15 -11 2698.04 602.996   3
 -15  -1  -8 16807.4 2244.97   1
  15   1   8 18254.6 2299.81   3
 -15  -1  -5 32154.7 2945.01   1
  15   1   5 25986.9 2710.24   3
  16 -15  -5 25256.4 1951.60   3
  15   1   2 27866.7 2857.72   3
  16 -15  -2 29984.2 2063.29   3
 -15  -1   1 17131.0 2140.10   1
  15   1  -1 13307.7 1965.47   3
  -1  16   1 16767.9 1275.63   3
  16 -15   1 16645.9 1512.65   3
   1 -16  -1 17161.0 1368.13   1
 -15  -1   4 11683.7 1710.84   1
  16 -15   4 11338.3 1225.87   3
  15   1  -4 10517.2 1787.95   3
  -1  16   4 11554.2 1190.88   3
   1 -16  -4 12198.7 1265.51   1
 -15  -1   7 4585.01 1025.38   1
  16 -15   7 4536.90 764.453   3
  15   1  -7 4208.07 1146.90   3
   1 -16  -7 5163.65 883.522   1
 -16  15  -7 3981.67 914.776   1
 -15  -1  10-452.764 622.167   1
  15   1 -10-367.422 752.185   3
  16 -15  10 396.002 261.100   3
   1 -16 -10 228.355 317.707   1
 -16  15 -10 788.792 503.765   1
 -16  15 -13 428.001 517.455   1
  15   1 -13-956.681 1134.42   3
  16 -15  13-292.622 372.976   3
   1 -16 -13-31.5779 463.888   1
 -15  -1  13-718.540 691.558   1
 -16  15 -16 213.064 430.403   1
   1 -16 -16 4.01258 501.147   1
  15   1 -19-424.279 772.347   3
 -16  15 -19 589.062 554.729   1
   1 -16 -19 185.349 451.945   1
 -15  -1  19-1170.72 724.681   1
  15   1 -22 93.7661 413.678   3
 -16  15 -22 904.613 665.881   1
   1 -16 -22-43.8382 458.935   1
 -16  15 -25 712.206 642.848   1
   1 -16 -25 474.225 475.427   1
  15   1 -25 749.723 604.147   3
   1 -16 -28 0.71418 517.564   1
  15   1 -28-236.161 512.176   3
 -14  -2 -30 1275.30 862.457   1
   2 -16  30 269.572 410.606   2
 -14  -2 -27-906.561 1053.40   1
   2 -16  27-589.070 532.108   2
 -14  -2 -24-970.149 1016.79   1
 -16  14  24 117.056 273.794   2
   2 -16  24-461.730 454.675   2
  16 -14 -24 482.857 479.949   3
 -16  14  21 831.492 411.596   2
   2 -16  21 281.891 417.754   2
  16 -14 -21 1117.18 629.573   3
 -16  14  18 3342.99 733.033   2
 -14  -2 -18 2769.84 858.000   1
  16 -14 -18 3822.59 959.850   3
 -16  14  15 159.089 205.284   2
 -14  -2 -15-189.341 653.004   1
  16 -14 -15-249.279 447.895   3
 -16  14  12 4516.44 727.575   2
 -14  -2 -12 5420.80 1310.46   1
  16 -14 -12 5423.21 1071.53   3
 -14  -2  -9 13747.0 1999.27   1
  14   2   9 14348.4 2007.90   3
 -16  14   9 10975.5 1015.01   2
  16 -14  -9 11253.4 1414.78   3
  16 -14  -6 17393.9 1700.94   3
 -14  -2  -6 23772.3 2490.94   1
  14   2   6 19892.7 2362.29   3
  16 -14  -3 20001.9 1762.06   3
 -14  -2  -3 24392.3 2484.66   1
  14   2   3 20759.8 2439.08   3
  16 -14   0 9725.25 1196.96   3
 -14  -2   0 10071.6 1587.43   1
  -2  16   0 10332.0 834.937   3
  14   2   0 9347.79 1668.08   3
 -14  -2   3 1103.10 616.570   1
  16 -14   3 1178.36 422.408   3
  14   2  -3 372.823 372.068   3
  -2  16   3 1143.85 328.728   3
   2 -16  -3 693.799 334.744   1
 -14  -2   6 2655.99 831.180   1
  14   2  -6 2321.13 904.045   3
  16 -14   6 1765.36 490.404   3
   2 -16  -6 2429.44 608.466   1
 -16  14  -6 1970.87 640.130   1
 -16  14  -9 1701.41 611.564   1
 -14  -2   9 2170.23 682.942   1
  14   2  -9 1423.13 647.792   3
   2 -16  -9 1875.89 586.485   1
  16 -14   9 1874.68 540.221   3
   2 -16 -12 4488.06 918.594   1
  14   2 -12 2593.66 719.882   3
 -16  14 -12 5400.66 1156.21   1
 -14  -2  12 3952.03 902.813   1
  16 -14  12 5341.46 862.465   3
 -16  14 -15 10161.2 1699.32   1
  14   2 -15 6094.12 1292.94   3
  16 -14  15 6520.24 944.643   3
   2 -16 -15 8907.77 1359.82   1
 -14  -2  15 7345.61 1221.53   1
  14   2 -18 1197.89 450.725   3
 -16  14 -18 1425.42 634.589   1
   2 -16 -18 1557.15 601.653   1
 -14  -2  18 1356.17 502.246   1
 -16  14 -21-206.292 650.022   1
   2 -16 -21-372.244 522.161   1
 -16  14 -24-181.850 507.037   1
  14   2 -24 176.925 440.700   3
   2 -16 -27-240.657 651.061   1
 -16  14 -27-235.303 690.665   1
  14   2 -27 784.028 629.609   3
   2 -16 -30-919.571 756.162   1
  14   2 -30-424.869 571.174   3
 -13  -3 -28-110.399 631.004   1
 -16  13  28 836.319 541.669   2
   3 -16  28 325.172 374.765   2
 -16  13  25 1189.98 575.027   2
   3 -16  25 756.100 556.521   2
 -13  -3 -25 2449.93 1103.22   1
  16 -13 -25 1878.61 831.580   3
 -13  -3 -22 1431.96 832.187   1
 -16  13  22 1425.46 594.752   2
   3 -16  22 1776.78 615.118   2
  16 -13 -22 1627.42 757.191   3
   3 -16  19 3597.65 773.312   2
 -16  13  19 2520.33 712.611   2
 -13  -3 -19 3570.90 1134.09   1
  16 -13 -19 3084.80 901.443   3
 -16  13  16 6736.45 996.209   2
 -13  -3 -16 8686.95 1644.86   1
  16 -13 -16 7103.11 1275.62   3
 -16  13  13 3187.08 632.310   2
 -13  -3 -13 3674.01 1025.66   1
  16 -13 -13 3081.63 835.424   3
 -13  -3 -10 4439.19 1102.20   1
  16 -13 -10 4889.98 957.018   3
 -13  -3  -7 8051.19 1441.21   1
  13   3   7 11261.7 1809.45   3
  16 -13  -7 10390.7 1352.56   3
  16 -13  -4 11608.1 1384.78   3
 -13  -3  -4 13245.6 1773.03   1
  13   3   4 11882.2 1800.01   3
  16 -13  -1 11088.9 1328.54   3
 -13  -3  -1 12374.8 1695.41   1
  13   3   1 11879.8 1833.40   3
  -3  16  -1 11126.1 650.351   3
  16 -13   2 2963.49 673.437   3
 -13  -3   2 2447.38 754.471   1
  13   3  -2 2721.21 890.189   3
  -3  16   2 2869.96 447.854   3
 -13  -3   5 3881.80 942.841   1
  16 -13   5 2684.49 649.253   3
  13   3  -5 2246.13 791.674   3
   3 -16  -5 2590.75 601.374   1
 -16  13  -5 2275.42 668.427   1
 -13  -3   8 3286.92 864.454   1
 -16  13  -8 2652.91 748.846   1
  13   3  -8 2371.20 847.514   3
   3 -16  -8 3792.93 785.579   1
  16 -13   8 3267.21 678.679   3
 -16  13 -11 3542.13 872.554   1
  13   3 -11 3335.31 981.097   3
  16 -13  11 5099.97 860.202   3
   3 -16 -11 4272.67 871.414   1
 -13  -3  11 4432.76 945.630   1
  13   3 -14 5517.17 1294.72   3
 -16  13 -14 4749.51 1106.55   1
  16 -13  14 5138.17 872.930   3
   3 -16 -14 4638.82 946.184   1
 -13  -3  14 5157.58 976.264   1
  13   3 -17 1696.31 748.196   3
 -16  13 -17 394.085 690.278   1
   3 -16 -17 1493.64 602.287   1
 -13  -3  17 2461.35 696.593   1
  13   3 -20 2417.83 955.615   3
   3 -16 -20 2289.82 803.293   1
 -16  13 -20 1944.30 798.306   1
   3 -16 -23-895.055 643.841   1
 -16  13 -23 1225.81 713.911   1
  13   3 -23 780.756 587.875   3
   3 -16 -26-447.671 528.260   1
 -16  13 -26-438.940 758.147   1
  13   3 -26 503.526 528.079   3
   3 -16 -29-820.934 634.843   1
 -16  13 -29-665.359 709.122   1
  13   3 -29 28.0567 420.274   3
 -16  12  32 985.061 654.639   2
 -12  -4 -29 3239.25 1346.92   1
   4 -16  29 2171.77 768.317   2
 -16  12  29 1999.98 790.980   2
  16 -12 -26 3934.45 1156.03   3
 -12  -4 -26 4680.36 1408.39   1
   4 -16  26 3284.91 871.260   2
 -16  12  26 3446.88 943.441   2
 -12  -4 -23 4356.39 1341.29   1
   4 -16  23 2360.98 737.163   2
 -16  12  23 2481.22 759.125   2
  16 -12 -23 3801.78 1123.25   3
 -12  -4 -20 3872.44 1241.74   1
   4 -16  20 3431.29 805.458   2
 -16  12  20 2281.64 697.372   2
  16 -12 -20 2632.00 945.769   3
   4 -16  17 5658.01 859.324   2
 -12  -4 -17 6862.68 1452.78   1
 -16  12  17 3598.48 749.389   2
  16 -12 -17 6308.87 1225.44   3
 -12  -4 -14 18008.0 2229.36   1
 -16  12  14 13843.2 1369.44   2
  16 -12 -14 16550.1 1884.64   3
 -12  -4 -11 26918.9 2606.79   1
  16 -12 -11 25444.8 2203.43   3
 -12  -4  -8 53216.6 3549.30   1
  16 -12  -8 50665.1 3048.17   3
  16 -12  -5 80373.8 3729.06   3
 -12  -4  -5 79114.5 4219.53   1
  12   4   5 88968.8 4763.41   3
 -12  -4  -2 41095.7 2979.78   1
  12   4   2 45941.5 3479.16   3
  16 -12  -2 45746.2 2748.89   3
  16 -12   1 16413.5 1612.72   3
 -12  -4   1 17054.6 1872.02   1
  -4  16   1 16948.2 810.928   3
  12   4  -1 16114.9 2060.33   3
 -12  -4   4 4658.92 961.926   1
  16 -12   4 4792.59 856.104   3
  12   4  -4 3947.14 1040.50   3
 -16  12  -4 2770.78 629.090   1
 -12  -4   7 944.605 429.852   1
  12   4  -7 764.711 445.838   3
  16 -12   7 1312.93 484.322   3
 -16  12  -7 638.616 406.204   1
 -16  12 -10 2250.26 738.153   1
 -12  -4  10 2202.17 654.778   1
  12   4 -10 2433.89 841.294   3
  16 -12  10 2487.74 641.198   3
   4 -16 -10 1895.44 566.493   1
  12   4 -13 18698.3 2209.46   3
   4 -16 -13 18671.2 1831.77   1
 -16  12 -13 19438.1 2228.61   1
  16 -12  13 18100.3 1665.14   3
 -12  -4  13 19519.5 1871.17   1
  12   4 -16 23949.7 2510.11   3
 -16  12 -16 32859.3 3013.63   1
   4 -16 -16 27679.1 2335.41   1
 -12  -4  16 25071.8 2050.09   1
   4 -16 -19 13653.5 1782.57   1
 -16  12 -19 17650.1 2294.38   1
  12   4 -19 11345.2 1745.00   3
   4 -16 -22 9494.31 1564.41   1
 -16  12 -22 12421.4 2033.74   1
  12   4 -22 9610.21 1668.08   3
 -16  12 -25 1675.70 931.189   1
   4 -16 -25 363.106 560.348   1
  12   4 -25 1250.00 672.458   3
   4 -16 -28-1188.93 738.058   1
 -16  12 -28-226.145 670.469   1
  12   4 -28 561.975 522.981   3
   4 -16 -31-263.148 602.190   1
 -16  12 -31-1374.62 911.015   1
  12   4 -31-189.195 500.948   3
 -16  11  33 138.864 354.953   2
 -16  11  30-84.2568 371.297   2
  16 -11 -30 728.839 708.515   3
 -11  -5 -27-1025.26 998.047   1
   5 -16  27-167.431 347.898   2
 -16  11  27 137.136 305.654   2
  16 -11 -27 557.777 589.034   3
 -11  -5 -24-477.925 889.669   1
   5 -16  24 627.090 389.720   2
 -16  11  24 168.576 346.562   2
  16 -11 -24 160.566 428.056   3
 -11  -5 -21 472.609 508.077   1
   5 -16  21 578.458 286.799   2
 -16  11  21-170.336 448.161   2
  16 -11 -21-312.739 579.363   3
 -11  -5 -18 17.6580 520.999   1
   5 -16  18-84.6436 298.031   2
 -16  11  18-538.261 553.910   2
  16 -11 -18-1267.33 773.056   3
   5 -16  15 4590.16 696.845   2
 -11  -5 -15 4246.46 1005.42   1
  16 -11 -15 1970.23 571.676   3
  16 -11 -12 4128.01 871.262   3
   5 -16  12 5040.67 674.112   2
 -11  -5 -12 5323.99 1094.91   1
 -11  -5  -9 16038.1 1876.43   1
  16 -11  -9 15327.7 1709.75   3
  16 -11  -6 37520.6 2602.40   3
 -11  -5  -6 36908.9 2773.67   1
  11   5   6 41218.7 3228.99   3
  16 -11  -3 13200.7 1514.10   3
  11   5   3 14323.9 1920.45   3
 -11  -5  -3 13421.2 1615.88   1
  16 -11   0-185.279 395.755   3
  11   5   0-95.5119 404.495   3
 -11  -5   0 329.992 356.035   1
  16 -11   3 3063.83 707.859   3
  11   5  -3 2249.07 756.630   3
 -11  -5   3 3502.50 795.706   1
 -16  11  -3 2372.45 607.054   1
 -16  11  -6 618.706 359.928   1
  11   5  -6 836.310 459.036   3
 -11  -5   6 1260.04 514.027   1
  16 -11   6 1492.81 536.934   3
  11   5  -9 614.826 452.220   3
 -11  -5   9 424.530 341.407   1
 -16  11  -9 462.146 397.106   1
  16 -11   9 349.681 340.736   3
 -16  11 -12-239.533 483.297   1
 -11  -5  12-49.8602 267.762   1
  11   5 -12 50.8449 270.195   3
  16 -11  12 64.5928 250.386   3
   5 -16 -12 126.699 401.653   1
  11   5 -15 3460.78 890.841   3
 -16  11 -15 6133.36 1349.39   1
   5 -16 -15 5753.84 1059.55   1
 -11  -5  15 6692.96 1031.37   1
  11   5 -18 5027.50 1119.34   3
 -16  11 -18 7063.43 1490.99   1
   5 -16 -18 5060.28 1036.71   1
 -16  11 -21 1447.44 797.898   1
   5 -16 -21 240.719 554.454   1
  11   5 -21 1747.13 753.982   3
 -16  11 -24 1100.92 892.826   1
   5 -16 -24 355.983 536.766   1
  11   5 -24 566.863 493.853   3
 -16  11 -27-479.698 691.594   1
   5 -16 -27-924.125 663.971   1
  11   5 -27-185.563 509.985   3
   5 -16 -30 282.578 602.986   1
  11   5 -30-113.169 369.189   3
 -16  11 -30-1242.57 883.141   1
 -16  11 -33-2065.12 1110.46   1
  11   5 -33-397.603 572.002   3
 -16  10  34 27.1153 355.042   2
 -10  -6 -31 510.966 703.508   1
 -16  10  31 808.766 606.223   2
  16 -10 -31 1414.57 840.582   3
 -10  -6 -28 3166.19 1168.48   1
 -16  10  28 2868.88 863.645   2
  16 -10 -28 3390.18 1034.93   3
 -10  -6 -25 4622.75 1222.55   1
 -16  10  25 4367.86 1006.61   2
  16 -10 -25 4695.15 1211.04   3
   6 -16  22 8466.58 1075.86   2
 -16  10  22 7003.09 1193.89   2
  16 -10 -22 9280.04 1552.94   3
 -10  -6 -22 8975.35 1665.75   1
  16 -10 -19 10090.9 1585.50   3
 -10  -6 -19 13176.1 1909.28   1
   6 -16  19 11053.6 1141.23   2
 -16  10  19 7789.27 1169.44   2
 -10  -6 -16 1178.55 688.073   1
   6 -16  16 1476.10 433.149   2
  16 -10 -16-296.752 688.842   3
  16 -10 -13 1130.20 517.718   3
   6 -16  13 1366.07 370.563   2
 -10  -6 -13 1739.03 764.676   1
  16 -10 -10 6389.38 1143.70   3
   6 -16  10 5593.46 638.342   2
 -10  -6 -10 7444.97 1255.36   1
  -6  16 -10 6176.58 707.177   1
  16 -10  -7 12821.4 1528.63   3
[truncated: 245,074 more chars]
